# Supplementary material for: ST8SIA4-mediated polysialylation is critical for CCR2-driven monocyte egress from the bone marrow
Source: bioRxiv preprint, doi:10.64898/2026.01.09.698551, version 1 (2026-01-12)
Supplement: Table S2 [file 698551_file04.xlsx]

## Sheet: Search settings and infos
project_name	Glycoproteomics	Glycoproteomics	Glycoproteomics	Glycoproteomics	Glycoproteomics	Glycoproteomics	Glycoproteomics	Glycoproteomics	Glycoproteomics	Glycoproteomics	Glycoproteomics	Glycoproteomics	Glycoproteomics	Glycoproteomics	Glycoproteomics	Glycoproteomics	Glycoproteomics	Glycoproteomics
quant_channel_name
result_set_name	AJS Yoann Aurelien Monocytes Mouse 291121 [Mascot] OXAJS211127_02_CV45.mgf	AJS Yoann Aurelien Monocytes Mouse 291121 [Mascot] OXAJS211127_02_CV60.mgf	AJS Yoann Aurelien Monocytes Mouse 291121 [Mascot] OXAJS211127_04_CV45.mgf	AJS Yoann Aurelien Monocytes Mouse 291121 [Mascot] OXAJS211127_04_CV60.mgf	AJS Yoann Aurelien Monocytes Mouse 291121 [Mascot] OXAJS211127_06_CV45.mgf	AJS Yoann Aurelien Monocytes Mouse 291121 [Mascot] OXAJS211127_06_CV60.mgf	AJS Yoann Aurelien Monocytes Mouse 291121 [Mascot] OXAJS211127_08_CV45.mgf	AJS Yoann Aurelien Monocytes Mouse 291121 [Mascot] OXAJS211127_08_CV60.mgf	AJS Yoann Aurelien Monocytes Mouse 291121 [Mascot] OXAJS211127_10_CV45.mgf	AJS Yoann Aurelien Monocytes Mouse 291121 [Mascot] OXAJS211127_10_CV60.mgf	AJS Yoann Aurelien Monocytes Mouse 291121 [Mascot] OXAJS211127_12_CV45.mgf	AJS Yoann Aurelien Monocytes Mouse 291121 [Mascot] OXAJS211127_12_CV60.mgf	AJS Yoann Aurelien Monocytes Mouse 291121 [Mascot] OXAJS211127_14_CV45.mgf	AJS Yoann Aurelien Monocytes Mouse 291121 [Mascot] OXAJS211127_14_CV60.mgf	AJS Yoann Aurelien Monocytes Mouse 291121 [Mascot] OXAJS211127_16_CV45.mgf	AJS Yoann Aurelien Monocytes Mouse 291121 [Mascot] OXAJS211127_16_CV60.mgf	AJS Yoann Aurelien Monocytes Mouse 291121 [Mascot] OXAJS211127_18_CV45.mgf	AJS Yoann Aurelien Monocytes Mouse 291121 [Mascot] OXAJS211127_18_CV60.mgf
search_title	AJS Yoann Aurelien Monocytes Mouse 291121 [Mascot] OXAJS211127_02_CV45.mgf	AJS Yoann Aurelien Monocytes Mouse 291121 [Mascot] OXAJS211127_02_CV60.mgf	AJS Yoann Aurelien Monocytes Mouse 291121 [Mascot] OXAJS211127_04_CV45.mgf	AJS Yoann Aurelien Monocytes Mouse 291121 [Mascot] OXAJS211127_04_CV60.mgf	AJS Yoann Aurelien Monocytes Mouse 291121 [Mascot] OXAJS211127_06_CV45.mgf	AJS Yoann Aurelien Monocytes Mouse 291121 [Mascot] OXAJS211127_06_CV60.mgf	AJS Yoann Aurelien Monocytes Mouse 291121 [Mascot] OXAJS211127_08_CV45.mgf	AJS Yoann Aurelien Monocytes Mouse 291121 [Mascot] OXAJS211127_08_CV60.mgf	AJS Yoann Aurelien Monocytes Mouse 291121 [Mascot] OXAJS211127_10_CV45.mgf	AJS Yoann Aurelien Monocytes Mouse 291121 [Mascot] OXAJS211127_10_CV60.mgf	AJS Yoann Aurelien Monocytes Mouse 291121 [Mascot] OXAJS211127_12_CV45.mgf	AJS Yoann Aurelien Monocytes Mouse 291121 [Mascot] OXAJS211127_12_CV60.mgf	AJS Yoann Aurelien Monocytes Mouse 291121 [Mascot] OXAJS211127_14_CV45.mgf	AJS Yoann Aurelien Monocytes Mouse 291121 [Mascot] OXAJS211127_14_CV60.mgf	AJS Yoann Aurelien Monocytes Mouse 291121 [Mascot] OXAJS211127_16_CV45.mgf	AJS Yoann Aurelien Monocytes Mouse 291121 [Mascot] OXAJS211127_16_CV60.mgf	AJS Yoann Aurelien Monocytes Mouse 291121 [Mascot] OXAJS211127_18_CV45.mgf	AJS Yoann Aurelien Monocytes Mouse 291121 [Mascot] OXAJS211127_18_CV60.mgf
search_date	2021:11:29 15:42:50	2021:11:29 15:38:21	2021:11:29 15:43:39	2021:11:29 15:39:02	2021:11:29 15:40:47	2021:11:29 15:26:15	2021:11:29 15:44:01	2021:11:29 15:55:20	2021:11:29 16:05:23	2021:11:29 16:00:44	2021:11:29 16:09:13	2021:11:29 16:15:04	2021:11:29 16:24:13	2021:11:29 16:21:43	2021:11:29 16:31:38	2021:11:29 16:31:15	2021:11:29 16:39:27	2021:11:29 16:39:19
raw_file_name	OXAJS211127_02_CV45	OXAJS211127_02_CV60	OXAJS211127_04_CV45	OXAJS211127_04_CV60	OXAJS211127_06_CV45	OXAJS211127_06_CV60	OXAJS211127_08_CV45	OXAJS211127_08_CV60	OXAJS211127_10_CV45	OXAJS211127_10_CV60	OXAJS211127_12_CV45	OXAJS211127_12_CV60	OXAJS211127_14_CV45	OXAJS211127_14_CV60	OXAJS211127_16_CV45	OXAJS211127_16_CV60	OXAJS211127_18_CV45	OXAJS211127_18_CV60
peaklist_file_path	OXAJS211127_02_CV45.mgf	OXAJS211127_02_CV60.mgf	OXAJS211127_04_CV45.mgf	OXAJS211127_04_CV60.mgf	OXAJS211127_06_CV45.mgf	OXAJS211127_06_CV60.mgf	OXAJS211127_08_CV45.mgf	OXAJS211127_08_CV60.mgf	OXAJS211127_10_CV45.mgf	OXAJS211127_10_CV60.mgf	OXAJS211127_12_CV45.mgf	OXAJS211127_12_CV60.mgf	OXAJS211127_14_CV45.mgf	OXAJS211127_14_CV60.mgf	OXAJS211127_16_CV45.mgf	OXAJS211127_16_CV60.mgf	OXAJS211127_18_CV45.mgf	OXAJS211127_18_CV60.mgf
result_file_name	F115878.dat	F115879.dat	F115880.dat	F115883.dat	F115881.dat	F115882.dat	F115884.dat	F115888.dat	F115889.dat	F115890.dat	F115892.dat	F115895.dat	F115896.dat	F115898.dat	F115899.dat	F115902.dat	F115903.dat	F115905.dat
result_file_directory	G:\Mascot\data\20211129	G:\Mascot\data\20211129	G:\Mascot\data\20211129	G:\Mascot\data\20211129	G:\Mascot\data\20211129	G:\Mascot\data\20211129	G:\Mascot\data\20211129	G:\Mascot\data\20211129	G:\Mascot\data\20211129	G:\Mascot\data\20211129	G:\Mascot\data\20211129	G:\Mascot\data\20211129	G:\Mascot\data\20211129	G:\Mascot\data\20211129	G:\Mascot\data\20211129	G:\Mascot\data\20211129	G:\Mascot\data\20211129	G:\Mascot\data\20211129
job_number	115878	115879	115880	115883	115881	115882	115884	115888	115889	115890	115892	115895	115896	115898	115899	115902	115903	115905
user_name	stella	stella	stella	stella	stella	stella	stella	stella	stella	stella	stella	stella	stella	stella	stella	stella	stella	stella
user_email	mascot default user email	mascot default user email	mascot default user email	mascot default user email	mascot default user email	mascot default user email	mascot default user email	mascot default user email	mascot default user email	mascot default user email	mascot default user email	mascot default user email	mascot default user email	mascot default user email	mascot default user email	mascot default user email	mascot default user email	mascot default user email
queries_count	60602	46092	59533	42691	51484	30045	61280	45872	63496	47908	63535	49670	58729	44781	61325	46555	55304	42507
searched_sequences_count	17060	17060	17060	17060	17060	17060	17060	17060	17060	17060	17060	17060	17060	17060	17060	17060	17060	17060
software_name	Mascot	Mascot	Mascot	Mascot	Mascot	Mascot	Mascot	Mascot	Mascot	Mascot	Mascot	Mascot	Mascot	Mascot	Mascot	Mascot	Mascot	Mascot
software_version	2.8.0.1	2.8.0.1	2.8.0.1	2.8.0.1	2.8.0.1	2.8.0.1	2.8.0.1	2.8.0.1	2.8.0.1	2.8.0.1	2.8.0.1	2.8.0.1	2.8.0.1	2.8.0.1	2.8.0.1	2.8.0.1	2.8.0.1	2.8.0.1
instrument_config	Q-EXACTIVE (A1=FTMS F=HCD A2=FTMS)	Q-EXACTIVE (A1=FTMS F=HCD A2=FTMS)	Q-EXACTIVE (A1=FTMS F=HCD A2=FTMS)	Q-EXACTIVE (A1=FTMS F=HCD A2=FTMS)	Q-EXACTIVE (A1=FTMS F=HCD A2=FTMS)	Q-EXACTIVE (A1=FTMS F=HCD A2=FTMS)	Q-EXACTIVE (A1=FTMS F=HCD A2=FTMS)	Q-EXACTIVE (A1=FTMS F=HCD A2=FTMS)	Q-EXACTIVE (A1=FTMS F=HCD A2=FTMS)	Q-EXACTIVE (A1=FTMS F=HCD A2=FTMS)	Q-EXACTIVE (A1=FTMS F=HCD A2=FTMS)	Q-EXACTIVE (A1=FTMS F=HCD A2=FTMS)	Q-EXACTIVE (A1=FTMS F=HCD A2=FTMS)	Q-EXACTIVE (A1=FTMS F=HCD A2=FTMS)	Q-EXACTIVE (A1=FTMS F=HCD A2=FTMS)	Q-EXACTIVE (A1=FTMS F=HCD A2=FTMS)	Q-EXACTIVE (A1=FTMS F=HCD A2=FTMS)	Q-EXACTIVE (A1=FTMS F=HCD A2=FTMS)
database_names	D:/Sequences/Sprot/current/Sprot_20201022.fasta	D:/Sequences/Sprot/current/Sprot_20201022.fasta	D:/Sequences/Sprot/current/Sprot_20201022.fasta	D:/Sequences/Sprot/current/Sprot_20201022.fasta	D:/Sequences/Sprot/current/Sprot_20201022.fasta	D:/Sequences/Sprot/current/Sprot_20201022.fasta	D:/Sequences/Sprot/current/Sprot_20201022.fasta	D:/Sequences/Sprot/current/Sprot_20201022.fasta	D:/Sequences/Sprot/current/Sprot_20201022.fasta	D:/Sequences/Sprot/current/Sprot_20201022.fasta	D:/Sequences/Sprot/current/Sprot_20201022.fasta	D:/Sequences/Sprot/current/Sprot_20201022.fasta	D:/Sequences/Sprot/current/Sprot_20201022.fasta	D:/Sequences/Sprot/current/Sprot_20201022.fasta	D:/Sequences/Sprot/current/Sprot_20201022.fasta	D:/Sequences/Sprot/current/Sprot_20201022.fasta	D:/Sequences/Sprot/current/Sprot_20201022.fasta	D:/Sequences/Sprot/current/Sprot_20201022.fasta
database_releases	2021:05:07 10:59:02	2021:05:07 10:59:02	2021:05:07 10:59:02	2021:05:07 10:59:02	2021:05:07 10:59:02	2021:05:07 10:59:02	2021:05:07 10:59:02	2021:05:07 10:59:02	2021:05:07 10:59:02	2021:05:07 10:59:02	2021:05:07 10:59:02	2021:05:07 10:59:02	2021:05:07 10:59:02	2021:05:07 10:59:02	2021:05:07 10:59:02	2021:05:07 10:59:02	2021:05:07 10:59:02	2021:05:07 10:59:02
database_sequences_count	563552	563552	563552	563552	563552	563552	563552	563552	563552	563552	563552	563552	563552	563552	563552	563552	563552	563552
taxonomy	. . . . . . . . . . . . . . . . . . Mus musculus (house mouse)	. . . . . . . . . . . . . . . . . . Mus musculus (house mouse)	. . . . . . . . . . . . . . . . . . Mus musculus (house mouse)	. . . . . . . . . . . . . . . . . . Mus musculus (house mouse)	. . . . . . . . . . . . . . . . . . Mus musculus (house mouse)	. . . . . . . . . . . . . . . . . . Mus musculus (house mouse)	. . . . . . . . . . . . . . . . . . Mus musculus (house mouse)	. . . . . . . . . . . . . . . . . . Mus musculus (house mouse)	. . . . . . . . . . . . . . . . . . Mus musculus (house mouse)	. . . . . . . . . . . . . . . . . . Mus musculus (house mouse)	. . . . . . . . . . . . . . . . . . Mus musculus (house mouse)	. . . . . . . . . . . . . . . . . . Mus musculus (house mouse)	. . . . . . . . . . . . . . . . . . Mus musculus (house mouse)	. . . . . . . . . . . . . . . . . . Mus musculus (house mouse)	. . . . . . . . . . . . . . . . . . Mus musculus (house mouse)	. . . . . . . . . . . . . . . . . . Mus musculus (house mouse)	. . . . . . . . . . . . . . . . . . Mus musculus (house mouse)	. . . . . . . . . . . . . . . . . . Mus musculus (house mouse)
enzymes	Trypsin/P	Trypsin/P	Trypsin/P	Trypsin/P	Trypsin/P	Trypsin/P	Trypsin/P	Trypsin/P	Trypsin/P	Trypsin/P	Trypsin/P	Trypsin/P	Trypsin/P	Trypsin/P	Trypsin/P	Trypsin/P	Trypsin/P	Trypsin/P
max_missed_cleavages	2	2	2	2	2	2	2	2	2	2	2	2	2	2	2	2	2	2
fixed_ptms	Carbamidomethyl (C)	Carbamidomethyl (C)	Carbamidomethyl (C)	Carbamidomethyl (C)	Carbamidomethyl (C)	Carbamidomethyl (C)	Carbamidomethyl (C)	Carbamidomethyl (C)	Carbamidomethyl (C)	Carbamidomethyl (C)	Carbamidomethyl (C)	Carbamidomethyl (C)	Carbamidomethyl (C)	Carbamidomethyl (C)	Carbamidomethyl (C)	Carbamidomethyl (C)	Carbamidomethyl (C)	Carbamidomethyl (C)
variable_ptms	Acetyl (Protein N-term); Oxidation (M)	Acetyl (Protein N-term); Oxidation (M)	Acetyl (Protein N-term); Oxidation (M)	Acetyl (Protein N-term); Oxidation (M)	Acetyl (Protein N-term); Oxidation (M)	Acetyl (Protein N-term); Oxidation (M)	Acetyl (Protein N-term); Oxidation (M)	Acetyl (Protein N-term); Oxidation (M)	Acetyl (Protein N-term); Oxidation (M)	Acetyl (Protein N-term); Oxidation (M)	Acetyl (Protein N-term); Oxidation (M)	Acetyl (Protein N-term); Oxidation (M)	Acetyl (Protein N-term); Oxidation (M)	Acetyl (Protein N-term); Oxidation (M)	Acetyl (Protein N-term); Oxidation (M)	Acetyl (Protein N-term); Oxidation (M)	Acetyl (Protein N-term); Oxidation (M)	Acetyl (Protein N-term); Oxidation (M)
peptide_charge_states	2+ and 3+	2+ and 3+	2+ and 3+	2+ and 3+	2+ and 3+	2+ and 3+	2+ and 3+	2+ and 3+	2+ and 3+	2+ and 3+	2+ and 3+	2+ and 3+	2+ and 3+	2+ and 3+	2+ and 3+	2+ and 3+	2+ and 3+	2+ and 3+
peptide_mass_error_tolerance	5.0 ppm	5.0 ppm	5.0 ppm	5.0 ppm	5.0 ppm	5.0 ppm	5.0 ppm	5.0 ppm	5.0 ppm	5.0 ppm	5.0 ppm	5.0 ppm	5.0 ppm	5.0 ppm	5.0 ppm	5.0 ppm	5.0 ppm	5.0 ppm
fragment_mass_error_tolerance	20.0 mmu	20.0 mmu	20.0 mmu	20.0 mmu	20.0 mmu	20.0 mmu	20.0 mmu	20.0 mmu	20.0 mmu	20.0 mmu	20.0 mmu	20.0 mmu	20.0 mmu	20.0 mmu	20.0 mmu	20.0 mmu	20.0 mmu	20.0 mmu
is_decoy	false	false	false	false	false	false	false	false	false	false	false	false	false	false	false	false	false	false

## Sheet: Import and filters
quant_channel_name	-
result_file_name	DATASET_IdentSummary_Id1128
import_params
psm_filter_expected_fdr	-
prot_filter_expected_fdr	-

## Sheet: Quant config
intensity computation method name	INTENSITY_SUM
quant channels mapping	List(Map(quant_channel_number -> 8, quant_channels_matching -> Map(3364 -> 57923, 3363 -> 57914)), Map(quant_channel_number -> 1, quant_channels_matching -> Map(3364 -> 57916, 3363 -> 57907)), Map(quant_channel_number -> 3, quant_channels_matching -> Map(3364 -> 57918, 3363 -> 57909)), Map(quant_channel_number -> 5, quant_channels_matching -> Map(3364 -> 57920, 3363 -> 57911)), Map(quant_channel_…
quantitation ids	List(61243, 61244)
discard peptides sharing peakels	false
use only specific peptides	true
peptide stat apply miss val inference	false
peptide stat min psm count per ratio	0
peptide stat min zscore	0.04
peptide stat stat tests alpha	0.01
peptide stat apply ttest	true
peptide stat apply variance correction	false
peptide stat apply ztest	true
peptide stat apply normalization	true
peptide stat miss val inference method	GAUSSIAN_MODEL
discard missed cleaved peptides	false
oxidized peptide filtering method	DISCARD_ALL_FORMS
apply profile clustering	false
protein stat apply miss val inference	true
protein stat min psm count per ratio	0
protein stat min zscore	0.04
protein stat stat tests alpha	0.01
protein stat apply ttest	true
protein stat apply variance correction	false
protein stat miss val inference noise percentile	5
protein stat apply ztest	true
protein stat apply normalization	true
protein stat miss val inference method	PERCENTILE
abundance summarizer method	LFQ
miss cleaved peptide filtering method	DISCARD_ALL_FORMS
discard oxidized peptides	false
summarizing based on	QUANT_PEPTIDE_IONS
profile clustering method	QUANT_PROFILE

## Sheet: Protein sets
protein_set_id	accession	gene_name	samesets_accessions	subsets_accessions	description	protein_set_score	is_validated	selection_level	#sameset_protein_matches	#subset_protein_matches	coverage	MW	#observable_peptides	#sequences	#specific_sequences	#peptides	#specific_peptides	spectral_count	specific_spectral_count	quantified_peptides_count	peptides_count_St8sia4-/- 1	peptides_count_St8sia4-/- 2	peptides_count_St8sia4-/- 3	peptides_count_WT polySia low 1	peptides_count_WT polySia low 2	peptides_count_WT polySia low 3	peptides_count_WT polySia high 1	peptides_count_WT polySia high 2	peptides_count_WT polySia high 3	psm_count_St8sia4-/- 1	psm_count_St8sia4-/- 2	psm_count_St8sia4-/- 3	psm_count_WT polySia low 1	psm_count_WT polySia low 2	psm_count_WT polySia low 3	psm_count_WT polySia high 1	psm_count_WT polySia high 2	psm_count_WT polySia high 3	raw_abundance_St8sia4-/- 1	raw_abundance_St8sia4-/- 2	raw_abundance_St8sia4-/- 3	raw_abundance_WT polySia low 1	raw_abundance_WT polySia low 2	raw_abundance_WT polySia low 3	raw_abundance_WT polySia high 1	raw_abundance_WT polySia high 2	raw_abundance_WT polySia high 3	abundance_St8sia4-/- 1	abundance_St8sia4-/- 2
451071	NCAM1_MOUSE	Ncam1	NCAM1_MOUSE		sp|P13595|NCAM1_MOUSE Neural cell adhesion molecule 1 OS=Mus musculus OX=10090 GN=Ncam1 PE=1 SV=3	594.459	true	2	1	0	17.67	119427	53	14	14	15	15	23	23	14	2	2	4	3	6	6	4	12	11	0	0	0	0	0	0	3	10	9	79649.7	110598	339134	686705	721761	864144	1.31525e+06	98473000	23431996	50978.2	29057.3
451436	SNAA_MOUSE	Napa	SNAA_MOUSE		sp|Q9DB05|SNAA_MOUSE Alpha-soluble NSF attachment protein OS=Mus musculus OX=10090 GN=Napa PE=1 SV=1	77.987	true	2	1	0	5.76	33190	21	2	2	2	2	3	3	2	1	1	1	2	2	2		2	2	0	0	0	0	1	0	0	2	0	31826.9	269483	69173.3	206311	940250	634094		4.39114e+06	230660	5935.54	15705.8
451688	T3HPD_MOUSE	L3hypdh	T3HPD_MOUSE		sp|Q9CXA2|T3HPD_MOUSE Trans-L-3-hydroxyproline dehydratase OS=Mus musculus OX=10090 GN=L3hypdh PE=1 SV=1	17.961	true	2	1	0	1.98	37804	21	1	1	1	1	6	6	1	1		1			1		1	1	0	0	0	0	0	0	0	2	4	2668.58		642894			1.86002e+06		5395080	5.40574e+06	2668.58	12408.4
451891	SCEL_MOUSE	Scel	SCEL_MOUSE		sp|Q9EQG3|SCEL_MOUSE Sciellin OS=Mus musculus OX=10090 GN=Scel PE=1 SV=2	72.719	true	2	1	0	3.22	72970	48	2	2	2	2	3	3	2	1	1		1	1	2	1	2	1	0	0	0	0	0	0	0	3	0	59147.3	108335		128225	138364	173746	7771.43	9537370	119196	6942.44	6282.3
450670	DNAS1_MOUSE	Dnase1	DNAS1_MOUSE		sp|P49183|DNAS1_MOUSE Deoxyribonuclease-1 OS=Mus musculus OX=10090 GN=Dnase1 PE=1 SV=2	78.248	true	2	1	0	8.8	32027	13	3	3	3	3	26	26	3	2	1	2	2	2	1	2	2	2	3	3	3	7	5	0	2	2	1	41357260	8648296	10384012	57717168	11704615	411199	128458760	4587814	130800072	18596746	222141
451040	AMY1_MOUSE	Amy1	AMY1_MOUSE; AMYP_MOUSE		sp|P00687|AMY1_MOUSE Alpha-amylase 1 OS=Mus musculus OX=10090 GN=Amy1 PE=1 SV=2	35.366	true	2	2	0	2.35	57643	28	1	1	1	1	3	3	1			1			1		1	1	0	0	0	0	0	0	0	1	2			107027			202543		3.40892e+06	5030860	12446.4	12408.4
451411	CHSTC_MOUSE	Chst12	CHSTC_MOUSE		sp|Q99LL3|CHSTC_MOUSE Carbohydrate sulfotransferase 12 OS=Mus musculus OX=10090 GN=Chst12 PE=2 SV=2	116.765	true	2	1	0	11.93	49398	23	4	4	4	4	7	7	4	1	1	2	2	3	4		4	3	0	0	0	0	4	1	0	2	0	287676	66327.6	110821	425206	4646118	2.44587e+06		4.42819e+06	504986	11098.3	4853.72
451134	C5AR1_MOUSE	C5ar1	C5AR1_MOUSE		sp|P30993|C5AR1_MOUSE C5a anaphylatoxin chemotactic receptor 1 OS=Mus musculus OX=10090 GN=C5ar1 PE=1 SV=2	58.75	true	2	1	0	6.27	39023	10	2	2	2	2	2	2	2	1			2	1	1	1	2	2	0	0	0	2	0	0	0	0	0	1.03483e+06			509984	73309.1	325545	30670.1	799859	899184	21359	12408.4
450980	ARGAL_MOUSE	Arhgef10l	ARGAL_MOUSE		sp|A2AWP8|ARGAL_MOUSE Rho guanine nucleotide exchange factor 10-like protein OS=Mus musculus OX=10090 GN=Arhgef10l PE=1 SV=1	25.053	true	2	1	0	0.86	139985	60	1	1	1	1	1	1	1								1	1	0	0	0	0	0	0	0	1	0								580680	2.88035e+06	12446.4	12408.4
451986	PACN2_MOUSE	Pacsin2	PACN2_MOUSE		sp|Q9WVE8|PACN2_MOUSE Protein kinase C and casein kinase substrate in neurons protein 2 OS=Mus musculus OX=10090 GN=Pacsin2 PE=1 SV=1	63.98	true	2	1	0	4.12	55833	25	2	2	2	2	2	2	2			1		1	2		2	2	0	0	1	0	0	0	0	1	0			347465		399368	952905		2.64003e+06	215333	12446.4	12408.4
450987	TMPSD_MOUSE	Tmprss13	TMPSD_MOUSE		sp|Q5U405|TMPSD_MOUSE Transmembrane protease serine 13 OS=Mus musculus OX=10090 GN=Tmprss13 PE=2 SV=2	32.122	true	2	1	0	1.47	59806	33	1	1	1	1	2	2	1		1			1			1	1	0	0	0	0	1	0	0	0	1		96691			6140020			2057108	2.52919e+06	12446.4	60005.3
451984	KHDR1_MOUSE	Khdrbs1	KHDR1_MOUSE		sp|Q60749|KHDR1_MOUSE KH domain-containing, RNA-binding, signal transduction-associated protein 1 OS=Mus musculus OX=10090 GN=Khdrbs1 PE=1 SV=2	70.288	true	2	1	0	5.42	48371	21	2	2	2	2	2	2	2	1	1	2		2	2	1	2	1	0	0	0	0	0	1	0	1	0	296851	268193	832113		2.61724e+06	1889710	546526	3.11132e+06	273343	20590.4	32246.1
451682	STT3B_MOUSE	Stt3b	STT3B_MOUSE		sp|Q3TDQ1|STT3B_MOUSE Dolichyl-diphosphooligosaccharide--protein glycosyltransferase subunit STT3B OS=Mus musculus OX=10090 GN=Stt3b PE=1 SV=2	87.54	true	2	1	0	4.5	93246	37	4	4	4	4	4	4	3		1	2	1	2	3	2	2	2	0	0	1	0	0	0	1	1	0		300447	973080	82749.1	775241	964009	49040.7	995620	831915	12446.4	11231.2
450610	TRXR1_MOUSE	Txnrd1	TRXR1_MOUSE		sp|Q9JMH6|TRXR1_MOUSE Thioredoxin reductase 1, cytoplasmic OS=Mus musculus OX=10090 GN=Txnrd1 PE=1 SV=3	53.566	true	2	1	0	3.26	67084	36	2	2	2	2	2	2	2		1	1	1	2	1	1	2	2	0	0	0	0	0	0	0	2	0		104980	88530.4	31326.3	569997	112095	10405.6	848610	89071.4	12446.4	14163.7
450837	CASPE_MOUSE	Casp14	CASPE_MOUSE		sp|O89094|CASPE_MOUSE Caspase-14 OS=Mus musculus OX=10090 GN=Casp14 PE=1 SV=1	26.271	true	2	1	0	5.84	29458	14	2	2	2	2	2	2	1	1	1	1			1		1	1	0	0	0	0	0	0	0	1	0	5721.27	14315.2	210839			190668		16919544	110584	5721.27	8883.82
451512	TRM6_MOUSE	Trmt6	TRM6_MOUSE		sp|Q8CE96|TRM6_MOUSE tRNA (adenine(58)-N(1))-methyltransferase non-catalytic subunit TRM6 OS=Mus musculus OX=10090 GN=Trmt6 PE=1 SV=1	45.847	true	2	1	0	3.42	55517	34	2	2	2	2	2	2	2	1	1			1	2		2	1	0	0	0	0	1	1	0	0	0	82418.3	129102			161619	300406		9011185	381276	77336.3	9999.13
452100	CLCB_MOUSE	Cltb	CLCB_MOUSE		sp|Q6IRU5|CLCB_MOUSE Clathrin light chain B OS=Mus musculus OX=10090 GN=Cltb PE=1 SV=1	52.147	true	2	1	0	8.3	25171	10	2	2	2	2	2	2	2		1	1	1	1			2	1	0	0	0	0	0	0	0	2	0		109650	118395	109929	112277			3367872	120758	12446.4	15579.5
451496	IF4G1_MOUSE	Eif4g1	IF4G1_MOUSE		sp|Q6NZJ6|IF4G1_MOUSE Eukaryotic translation initiation factor 4 gamma 1 OS=Mus musculus OX=10090 GN=Eif4g1 PE=1 SV=1	183.886	true	2	1	0	3.75	176077	78	5	5	5	5	7	7	5		1	2	1	3	2	1	5	2	0	0	0	1	1	0	0	5	0		121924	438842	349102	1.25702e+06	337307	16757.8	5.36417e+06	557292	12446.4	12045.4
450960	CALL3_MOUSE	Calml3	CALL3_MOUSE		sp|Q9D6P8|CALL3_MOUSE Calmodulin-like protein 3 OS=Mus musculus OX=10090 GN=Calml3 PE=2 SV=1	127.978	true	2	1	0	19.46	16701	7	3	2	3	2	3	2	2	1	1	1	1	1	2		2		0	0	0	0	0	0	0	2	0	401203	137083	67216	559546	151848	130125		15703977		26443.2	8569.72
451568	PYGB_MOUSE	Pygb	PYGB_MOUSE		sp|Q8CI94|PYGB_MOUSE Glycogen phosphorylase, brain form OS=Mus musculus OX=10090 GN=Pygb PE=1 SV=3	89.7	true	2	1	0	3.32	96730	53	3	3	3	3	4	4	3	1	1	1		2			3		0	0	0	0	1	0	0	3	0	54379	48438.2	38024.4		391835			4387046		9236.54	7131.64
451905	GSDMA_MOUSE	Gsdma	GSDMA_MOUSE	GSDA3_MOUSE	sp|Q9EST1|GSDMA_MOUSE Gasdermin-A OS=Mus musculus OX=10090 GN=Gsdma PE=2 SV=1	114.452	true	2	1	1	5.38	49593	28	3	3	3	3	12	12	3	2	1	3	2	3	1	2	3	2	2	1	0	2	0	0	4	1	2	10677531	1.61744e+06	181221	9510256	323839	359023	4194043	12912120	624869	885857	55703.2
451014	NRP2_MOUSE	Nrp2	NRP2_MOUSE		sp|O35375|NRP2_MOUSE Neuropilin-2 OS=Mus musculus OX=10090 GN=Nrp2 PE=1 SV=2	78.537	true	2	1	0	2.26	104631	54	2	2	2	2	4	4	2	1			2	2	2	1	2	1	0	0	0	1	1	0	0	1	1	436714			544170	1.16743e+06	1.08298e+06	17325.9	880829	478249	43987.2	12408.4
451854	RS30_MOUSE	Fau	RS30_MOUSE		sp|P62862|RS30_MOUSE 40S ribosomal protein S30 OS=Mus musculus OX=10090 GN=Fau PE=1 SV=1	49.513	true	2	1	0	16.95	6647	3	1	1	1	1	2	2	1				1					1	0	0	0	1	0	0	0	0	1				4308202					2.5036e+06	12446.4	12408.4
452131	HNRL1_MOUSE	Hnrnpul1	HNRL1_MOUSE		sp|Q8VDM6|HNRL1_MOUSE Heterogeneous nuclear ribonucleoprotein U-like protein 1 OS=Mus musculus OX=10090 GN=Hnrnpul1 PE=1 SV=1	224.157	true	2	1	0	8.27	96002	45	6	6	6	6	14	14	6	2	2	3	4	4	4	1	5	5	0	0	0	0	2	2	0	6	4	1.58424e+06	448465	988129	1.40894e+06	7235085	5083884	4627.84	12464371	5502344	117847	25305
451315	CAND1_MOUSE	Cand1	CAND1_MOUSE		sp|Q6ZQ38|CAND1_MOUSE Cullin-associated NEDD8-dissociated protein 1 OS=Mus musculus OX=10090 GN=Cand1 PE=1 SV=2	149.923	true	2	1	0	3.82	136332	67	4	4	4	4	5	5	4		1	2	2	3	1	1	4	1	0	0	0	0	1	0	0	4	0		197164	415338	722168	1.18608e+06	249086	34291.3	6.09157e+06	134848	12446.4	10887.9
451616	SMD3_MOUSE	Snrpd3	SMD3_MOUSE		sp|P62320|SMD3_MOUSE Small nuclear ribonucleoprotein Sm D3 OS=Mus musculus OX=10090 GN=Snrpd3 PE=1 SV=1	67.607	true	2	1	0	15.08	13916	9	2	2	2	2	6	6	2	1		1	2		1		1	1	1	0	0	3	0	0	0	1	1	1.95993e+06		15844.6	2327898		46267.7		1.62065e+06	2.66587e+06	125648	12408.4
451236	ZO1_MOUSE	Tjp1	ZO1_MOUSE		sp|P39447|ZO1_MOUSE Tight junction protein ZO-1 OS=Mus musculus OX=10090 GN=Tjp1 PE=1 SV=2	109.27	true	2	1	0	2.06	194742	102	3	3	3	3	3	3	3	1	1	1		2	1		3		0	0	0	0	0	0	0	3	0	81607.8	81584.9	74639.2		102608	205732		3.1623e+06		14093.6	6001.54
450501	HMCS1_MOUSE	Hmgcs1	HMCS1_MOUSE		sp|Q8JZK9|HMCS1_MOUSE Hydroxymethylglutaryl-CoA synthase, cytoplasmic OS=Mus musculus OX=10090 GN=Hmgcs1 PE=1 SV=1	80.406	true	2	1	0	4.04	57569	26	2	2	2	2	2	2	2	1	1	1		2	1		2		0	0	0	0	0	0	0	2	0	131201	72482.1	38570.2		331620	34402.2		4965946		12357.1	8699.31
451908	LGUL_MOUSE	Glo1	LGUL_MOUSE		sp|Q9CPU0|LGUL_MOUSE Lactoylglutathione lyase OS=Mus musculus OX=10090 GN=Glo1 PE=1 SV=3	26.429	true	2	1	0	3.8	20810	11	1	1	1	1	1	1	1			1	1	1	1	1	1	1	0	0	0	0	0	0	0	1	0			200799	94664.4	303994	201450	45861.2	2.86029e+06	68864.7	12446.4	12408.4
452150	CBR1_MOUSE	Cbr1	CBR1_MOUSE		sp|P48758|CBR1_MOUSE Carbonyl reductase [NADPH] 1 OS=Mus musculus OX=10090 GN=Cbr1 PE=1 SV=3	44.239	true	2	1	0	6.86	30641	19	2	2	2	2	2	2	2	1	1			2			2		0	0	0	0	0	0	0	2	0	279697	122381			1.40519e+06			10199162		28073.5	2924.71
451717	RL29_MOUSE	Rpl29	RL29_MOUSE		sp|P47915|RL29_MOUSE 60S ribosomal protein L29 OS=Mus musculus OX=10090 GN=Rpl29 PE=1 SV=2	147.493	true	2	1	0	19.38	17587	6	4	4	4	4	14	14	4	3	2	1	3	3	2	1	2	3	2	0	0	2	5	1	1	0	3	46341420	2.35922e+06	5.22816e+06	28336052	5619538	1.02749e+06	500398	494657	42082696	2.49163e+06	339016
451479	NHP2_MOUSE	Nhp2	NHP2_MOUSE		sp|Q9CRB2|NHP2_MOUSE H/ACA ribonucleoprotein complex subunit 2 OS=Mus musculus OX=10090 GN=Nhp2 PE=1 SV=1	60.997	true	2	1	0	6.54	17247	6	1	1	1	1	7	7	1			1			1		1	1	0	0	1	0	0	2	0	2	2			828183			2594976		2.4815e+06	3261423	12446.4	12408.4
451896	MATR3_MOUSE	Matr3	MATR3_MOUSE		sp|Q8K310|MATR3_MOUSE Matrin-3 OS=Mus musculus OX=10090 GN=Matr3 PE=1 SV=1	66.847	true	2	1	0	2.36	94630	45	2	2	2	2	2	2	2			1	2	2	1		2	1	0	0	0	0	2	0	0	0	0			164226	268664	1.70627e+06	225972		1.42179e+06	34980.2	12446.4	12408.4
450536	K2C4_MOUSE	Krt4	K2C4_MOUSE		sp|P07744|K2C4_MOUSE Keratin, type II cytoskeletal 4 OS=Mus musculus OX=10090 GN=Krt4 PE=1 SV=2	342.071	true	2	1	0	13.9	56283	31	11	4	11	4	33	5	4	2	1	2	2	2	2	2	4	3	2	0	0	0	0	0	0	2	1	376676608	25236984	7.64733e+06	9750390	17831126	12345163	85132896	63837608	3.538e+06	3.34887e+06	17343.2
451648	SORCN_MOUSE	Sri	SORCN_MOUSE		sp|Q6P069|SORCN_MOUSE Sorcin OS=Mus musculus OX=10090 GN=Sri PE=1 SV=1	56.934	true	2	1	0	9.09	21627	13	2	2	2	2	3	3	2	2	1	2	1	2	2	2	2	2	0	1	0	0	1	0	0	1	0	461555	609051	507018	208782	1.59768e+06	310451	103096	7449423	223862	162320	20077.7
450700	CRNL1_MOUSE	Crnkl1	CRNL1_MOUSE		sp|P63154|CRNL1_MOUSE Crooked neck-like protein 1 OS=Mus musculus OX=10090 GN=Crnkl1 PE=1 SV=1	105.338	true	2	1	0	3.04	83416	46	2	2	2	2	3	3	2	1		2		2	2	1	2	1	0	0	0	0	1	1	0	1	0	131632		85010.3		351840	1337810	5846.36	686084	369793	8086.16	12408.4
451502	RBM8A_MOUSE	Rbm8a	RBM8A_MOUSE		sp|Q9CWZ3|RBM8A_MOUSE RNA-binding protein 8A OS=Mus musculus OX=10090 GN=Rbm8a PE=1 SV=4	183.615	true	2	1	0	36.78	19888	8	4	4	4	4	7	7	4	1	2	2		3	3		4	3	0	0	0	0	1	1	0	2	3	470799	522635	468670		4497976	4190940		6863281	1.58779e+06	9664.65	158688
451613	BAZ1B_MOUSE	Baz1b	BAZ1B_MOUSE		sp|Q9Z277|BAZ1B_MOUSE Tyrosine-protein kinase BAZ1B OS=Mus musculus OX=10090 GN=Baz1b PE=1 SV=2	49.482	true	2	1	0	1.42	170651	93	2	2	2	2	2	2	2	1	1	1		2	2		2	1	1	0	0	0	1	0	0	0	0	151356	159323	134477		785889	354079		491267	28160.2	9924.59	6395.18
450545	K2C73_MOUSE	Krt73	K2C73_MOUSE		sp|Q6NXH9|K2C73_MOUSE Keratin, type II cytoskeletal 73 OS=Mus musculus OX=10090 GN=Krt73 PE=1 SV=1	290.164	true	2	1	0	11.32	58911	37	7	2	7	2	54	2	2	1		2	1	1	1		1	2	0	0	0	1	1	0	0	0	0	282663520	224912432	101970976	55331020	140142048	144937824	228104384	165310816	32622132	7125.96	12408.4
450666	SMD1_MOUSE	Snrpd1	SMD1_MOUSE		sp|P62315|SMD1_MOUSE Small nuclear ribonucleoprotein Sm D1 OS=Mus musculus OX=10090 GN=Snrpd1 PE=1 SV=1	70.282	true	2	1	0	10.92	13281	5	2	2	2	2	7	7	2	1	1	2		2	2		2	1	0	1	1	0	1	0	0	2	2	316702	271923	850881		2.72002e+06	1.79764e+06		3763810	632517	9317.24	5580.23
451698	EIF3F_MOUSE	Eif3f	EIF3F_MOUSE		sp|Q9DCH4|EIF3F_MOUSE Eukaryotic translation initiation factor 3 subunit F OS=Mus musculus OX=10090 GN=Eif3f PE=1 SV=2	45.28	true	2	1	0	4.71	37984	16	2	2	2	2	2	2	2		1	1		1			2	1	0	0	0	0	1	0	0	1	0		10507.8	123020		193493			1.42949e+06	67247.1	12446.4	1538
451784	ARL8B_MOUSE	Arl8b	ARL8B_MOUSE		sp|Q9CQW2|ARL8B_MOUSE ADP-ribosylation factor-like protein 8B OS=Mus musculus OX=10090 GN=Arl8b PE=1 SV=1	77.442	true	2	1	0	14.52	21539	13	3	2	3	2	5	4	2	1	1	1	1	1	1		2	1	0	0	0	0	0	0	0	3	1	485946	906760	224948	47840.9	2225648	261891		9377357	244894	17818.3	73883.7
450672	EIF3D_MOUSE	Eif3d	EIF3D_MOUSE		sp|O70194|EIF3D_MOUSE Eukaryotic translation initiation factor 3 subunit D OS=Mus musculus OX=10090 GN=Eif3d PE=1 SV=2	61.453	true	2	1	0	3.47	63989	27	2	2	2	2	3	3	2	1	2	1		2	1		2	2	0	0	0	0	1	0	0	1	1	179015	868116	178461		1.42469e+06	123617		4616768	473860	13381.4	277213
450641	AL3A1_MOUSE	Aldh3a1	AL3A1_MOUSE	AL3A2_MOUSE	sp|P47739|AL3A1_MOUSE Aldehyde dehydrogenase, dimeric NADP-preferring OS=Mus musculus OX=10090 GN=Aldh3a1 PE=1 SV=2	71.545	true	2	1	1	5.74	50481	25	3	3	3	3	4	4	3	1	1	1		1			3	1	0	0	0	0	0	0	0	4	0	28923	96405.2	35136.8		76312.2			4393556	23330	21358.7	6322.36
450702	TS101_MOUSE	Tsg101	TS101_MOUSE		sp|Q61187|TS101_MOUSE Tumor susceptibility gene 101 protein OS=Mus musculus OX=10090 GN=Tsg101 PE=1 SV=2	40.31	true	2	1	0	2.56	44124	21	1	1	1	1	1	1	1			1	1	1	1	1	1	1	0	0	0	0	0	0	0	1	0			208388	17842.8	123664	518711	51178	770270	138503	12446.4	12408.4
451702	S10AB_MOUSE	S100a11	S10AB_MOUSE		sp|P50543|S10AB_MOUSE Protein S100-A11 OS=Mus musculus OX=10090 GN=S100a11 PE=1 SV=1	115.386	true	2	1	0	23.47	11083	5	2	2	3	3	10	10	3	1	1	2	1	1	2	1	3	2	0	1	1	0	0	0	3	4	1	46638.1	6.12812e+06	1.55086e+06	41541.8	3.11751e+06	1.40756e+06	236761	93189680	945912	265223	736020
451511	SLIT2_MOUSE	Slit2	SLIT2_MOUSE		sp|Q9R1B9|SLIT2_MOUSE Slit homolog 2 protein OS=Mus musculus OX=10090 GN=Slit2 PE=2 SV=2	24.53	true	2	1	0	0.46	168781	77	1	1	1	1	1	1	1							1			0	0	0	0	0	0	1	0	0							305972			12446.4	12408.4
450842	LARP1_MOUSE	Larp1	LARP1_MOUSE		sp|Q6ZQ58|LARP1_MOUSE La-related protein 1 OS=Mus musculus OX=10090 GN=Larp1 PE=1 SV=3	68.261	true	2	1	0	1.87	121123	65	2	2	2	2	2	2	2	1		1	1	2	1		2	1	0	0	0	1	0	0	0	1	0	149611		57431.5	331374	607957	58180.8		3.58401e+06	94170.2	76338.5	12408.4
451432	AIMP1_MOUSE	Aimp1	AIMP1_MOUSE		sp|P31230|AIMP1_MOUSE Aminoacyl tRNA synthase complex-interacting multifunctional protein 1 OS=Mus musculus OX=10090 GN=Aimp1 PE=1 SV=2	77.735	true	2	1	0	9.35	33997	19	2	2	2	2	2	2	2		1			2			1	1	0	1	0	0	0	0	0	1	0		65881.4			516371			422011	152927	12446.4	7004
451310	LC7L3_MOUSE	Luc7l3	LC7L3_MOUSE		sp|Q5SUF2|LC7L3_MOUSE Luc7-like protein 3 OS=Mus musculus OX=10090 GN=Luc7l3 PE=1 SV=1	68.845	true	2	1	0	6.25	51450	21	2	2	2	2	4	4	2	1	1	1		2	1		1	2	0	0	0	0	2	0	0	1	1	49926.7	384187	26433.5		1.40927e+06	642756		1.4091e+06	104517	14230.8	39566.8
451153	CCAR1_MOUSE	Ccar1	CCAR1_MOUSE		sp|Q8CH18|CCAR1_MOUSE Cell division cycle and apoptosis regulator protein 1 OS=Mus musculus OX=10090 GN=Ccar1 PE=1 SV=1	48.072	true	2	1	0	2.27	132060	57	2	2	2	2	2	2	2			1	1	1	1		1	1	0	0	0	0	1	0	0	0	1			70035.6	179484	443486	335199		330362	2.00292e+06	12446.4	12408.4
451886	DKC1_MOUSE	Dkc1	DKC1_MOUSE		sp|Q9ESX5|DKC1_MOUSE H/ACA ribonucleoprotein complex subunit DKC1 OS=Mus musculus OX=10090 GN=Dkc1 PE=1 SV=4	193.862	true	2	1	0	16.9	57402	35	7	7	7	7	8	8	7	2	1	4	1	5	5	2	6	5	0	0	1	1	1	1	0	2	2	2.83378e+06	187386	2.94855e+06	1.40284e+06	3.11135e+06	9656513	168847	7401593	1.49648e+06	210339	33899.5
452096	IF4H_MOUSE	Eif4h	IF4H_MOUSE		sp|Q9WUK2|IF4H_MOUSE Eukaryotic translation initiation factor 4H OS=Mus musculus OX=10090 GN=Eif4h PE=1 SV=3	85.705	true	2	1	0	6.45	27341	19	2	2	2	2	3	3	2	1	1	1	1	2	2		2	1	0	0	1	0	1	0	0	1	0	6365.35	1.27055e+06	1168475	556053	3.79815e+06	1.20747e+06		7.21614e+06	950190	5368.4	188650
450993	EP15R_MOUSE	Eps15l1	EP15R_MOUSE		sp|Q60902|EP15R_MOUSE Epidermal growth factor receptor substrate 15-like 1 OS=Mus musculus OX=10090 GN=Eps15l1 PE=1 SV=3	46.656	true	2	1	0	2.43	99309	53	2	2	2	2	2	2	2		1	1					2	1	0	0	0	0	0	0	0	2	0		86629.9	42200.2					899574	16638.5	12446.4	9634.63
450566	K1C13_MOUSE	Krt13	K1C13_MOUSE	K1C20_MOUSE; K1C24_MOUSE; K1C28_MOUSE; K1H2_MOUSE; KT222_MOUSE	sp|P08730|K1C13_MOUSE Keratin, type I cytoskeletal 13 OS=Mus musculus OX=10090 GN=Krt13 PE=1 SV=2	500.532	true	2	1	5	21.97	47754	31	13	2	15	2	189	4	2	1	1	1	1		1	1	2	1	1	0	0	0	0	0	0	1	2	6149779968	5067917824	2241983744	2532563200	1371389184	2192221440	2353560320	3890743040	695401600	6.74676e+06	213115
451758	U2AF1_MOUSE	U2af1	U2AF1_MOUSE		sp|Q9D883|U2AF1_MOUSE Splicing factor U2AF 35 kDa subunit OS=Mus musculus OX=10090 GN=U2af1 PE=1 SV=4	104.978	true	2	1	0	8.79	27815	12	2	2	2	2	7	7	2	1	1	2	1	2	2	2	2	2	0	0	2	0	2	2	0	1	0	1.27409e+06	2218449	1959420	1.17883e+06	6.70744e+06	4.03481e+06	22027.2	2.98739e+06	745895	44127.8	33604.7
450751	AMPL_MOUSE	Lap3	AMPL_MOUSE		sp|Q9CPY7|AMPL_MOUSE Cytosol aminopeptidase OS=Mus musculus OX=10090 GN=Lap3 PE=1 SV=3	36.769	true	2	1	0	2.31	56141	30	1	1	1	1	2	2	1			1		1	1	1	1	1	0	0	0	0	1	0	0	1	0			145653		636221	96268.1	9162.61	2.52059e+06	94252.7	12446.4	12408.4
451327	HS74L_MOUSE	Hspa4l	HS74L_MOUSE		sp|P48722|HS74L_MOUSE Heat shock 70 kDa protein 4L OS=Mus musculus OX=10090 GN=Hspa4l PE=1 SV=2	90.83	true	2	1	0	2.86	94382	61	2	2	2	2	3	3	2		1	1	1	1			2		0	0	0	0	0	0	0	3	0		47000.1	68809.7	123231	148610			2.1298e+06		12446.4	5305.32
451655	BACH_MOUSE	Acot7	BACH_MOUSE		sp|Q91V12|BACH_MOUSE Cytosolic acyl coenzyme A thioester hydrolase OS=Mus musculus OX=10090 GN=Acot7 PE=1 SV=2	104.034	true	2	1	0	9.19	42537	22	3	3	3	3	3	3	3	1	1	2		3	2	1	3	1	0	0	0	0	1	0	0	2	0	112259	150447	214686		1.296e+06	235891	11006.9	6897320	144134	8323.88	17448.6
451848	RS21_MOUSE	Rps21	RS21_MOUSE		sp|Q9CQR2|RS21_MOUSE 40S ribosomal protein S21 OS=Mus musculus OX=10090 GN=Rps21 PE=1 SV=1	124.302	true	2	1	0	28.92	9141	7	2	2	3	3	4	4	3	1	1	2	2	2	1		3	2	0	0	1	0	0	0	0	3	0	293480	332981	507372	257539	886496	255421		5.67524e+06	162655	13695.5	13649.5
450961	CALM1_MOUSE	Calm1	CALM1_MOUSE; CALM2_MOUSE; CALM3_MOUSE		sp|P0DP26|CALM1_MOUSE Calmodulin-1 OS=Mus musculus OX=10090 GN=Calm1 PE=1 SV=1	166.51	true	2	3	0	28.19	16837	9	3	2	3	2	3	2	2						1		2		0	0	0	0	0	0	0	2	0	35634.9					860989		5103189		12446.4	12408.4
451408	SC31A_MOUSE	Sec31a	SC31A_MOUSE		sp|Q3UPL0|SC31A_MOUSE Protein transport protein Sec31A OS=Mus musculus OX=10090 GN=Sec31a PE=1 SV=2	62.024	true	2	1	0	1.79	133569	55	2	2	2	2	3	3	2			1	1	2	1		2	1	0	0	0	0	1	0	0	2	0			175244	95097.9	719465	157430		791557	105733	12446.4	12408.4
450801	DERL1_MOUSE	Derl1	DERL1_MOUSE		sp|Q99J56|DERL1_MOUSE Derlin-1 OS=Mus musculus OX=10090 GN=Derl1 PE=1 SV=1	40.833	true	2	1	0	3.19	28835	11	1	1	1	1	1	1	1		1	1	1	1		1	1	1	0	0	0	0	0	0	0	1	0		1.11419e+06	92621.1	332438	203146		4.27255e+06	701395	21566	12446.4	691454
450614	SF3B4_MOUSE	Sf3b4	SF3B4_MOUSE		sp|Q8QZY9|SF3B4_MOUSE Splicing factor 3B subunit 4 OS=Mus musculus OX=10090 GN=Sf3b4 PE=1 SV=1	32.919	true	2	1	0	1.89	44356	19	1	1	1	1	1	1	1		1	1	1	1	1	1	1	1	0	0	0	0	0	0	0	0	1		31241.4	168518	17849.7	35634.3	266463	62441.5	308279	167633	12446.4	19388.1
450907	HECD1_MOUSE	Hectd1	HECD1_MOUSE		sp|Q69ZR2|HECD1_MOUSE E3 ubiquitin-protein ligase HECTD1 OS=Mus musculus OX=10090 GN=Hectd1 PE=1 SV=2	110.173	true	2	1	0	1.53	290086	149	4	4	4	4	4	4	4	1	1	1		1			4		0	0	0	0	0	0	0	4	0	59536.7	95160.4	44526.6		68152.8			3543316		15094.3	14838.3
451735	RABP2_MOUSE	Crabp2	RABP2_MOUSE		sp|P22935|RABP2_MOUSE Cellular retinoic acid-binding protein 2 OS=Mus musculus OX=10090 GN=Crabp2 PE=2 SV=2	40.119	true	2	1	0	10.14	15745	12	1	1	1	1	1	1	1						1		1		0	0	0	0	0	0	0	1	0						24107		6.16738e+06		12446.4	12408.4
450525	H2A1B_MOUSE	H2ac4	H2A1B_MOUSE; H2A1C_MOUSE; H2A1D_MOUSE; H2A1E_MOUSE; H2A1F_MOUSE; H2A1G_MOUSE; H2A1H_MOUSE; H2A1I_MOUSE; H2A1K_MOUSE; H2A1N_MOUSE; H2A1O_MOUSE; H2A1P_MOUSE; H2A3_MOUSE	H2A2B_MOUSE; H2AJ_MOUSE	sp|C0HKE1|H2A1B_MOUSE Histone H2A type 1-B OS=Mus musculus OX=10090 GN=H2ac4 PE=1 SV=1	227.108	true	2	13	2	40.77	14135	7	6	2	6	2	46	4	2	1	1	1		2	1		2	1	0	1	0	0	1	0	0	2	0	388906848	451023680	77103496	48834180	738273024	103324792	129022688	1673313664	2.72568e+06	90607.7	254077
451584	UBE2K_MOUSE	Ube2k	UBE2K_MOUSE		sp|P61087|UBE2K_MOUSE Ubiquitin-conjugating enzyme E2 K OS=Mus musculus OX=10090 GN=Ube2k PE=1 SV=3	119.005	true	2	1	0	16	22406	14	3	3	3	3	4	4	3		1	2	1	1	2	1	3	2	0	1	0	0	0	0	0	2	1		515870	811622	162099	1309258	518905	16634.5	3561111	431618	12446.4	29157.3
451225	NCPR_MOUSE	Por	NCPR_MOUSE		sp|P37040|NCPR_MOUSE NADPH--cytochrome P450 reductase OS=Mus musculus OX=10090 GN=Por PE=1 SV=2	54.297	true	2	1	0	2.95	77044	37	2	2	2	2	2	2	2	1	1	1		1	1		2	1	0	0	0	0	0	0	0	2	0	223204	140056	94160		249982	67816.7		3036856	366297	72017	30022.7
452101	MYO1D_MOUSE	Myo1d	MYO1D_MOUSE		sp|Q5SYD0|MYO1D_MOUSE Unconventional myosin-Id OS=Mus musculus OX=10090 GN=Myo1d PE=1 SV=1	24.56	true	2	1	0	1.49	116081	74	2	2	2	2	2	2	2	1	1	1		1	2		2		0	0	0	0	0	0	0	2	0	38372.7	202060	403236		47548.2	213488		2448753		7387.76	14137
451768	RS5_MOUSE	Rps5	RS5_MOUSE		sp|P97461|RS5_MOUSE 40S ribosomal protein S5 OS=Mus musculus OX=10090 GN=Rps5 PE=1 SV=3	49.119	true	2	1	0	4.41	22889	10	1	1	1	1	1	1	1		1	1		1	1		1	1	0	0	1	0	0	0	0	0	0		15549	606079		34440.5	330296		1.26983e+06	799165	12446.4	9649.53
451355	PIPNB_MOUSE	Pitpnb	PIPNB_MOUSE		sp|P53811|PIPNB_MOUSE Phosphatidylinositol transfer protein beta isoform OS=Mus musculus OX=10090 GN=Pitpnb PE=1 SV=2	51.466	true	2	1	0	8.12	31487	24	2	2	2	2	2	2	2		1	1	1	1	1	1	2	1	0	0	0	0	0	0	0	2	0		80724	32639.2	24696	176981	66459	20991.9	974854	22543.8	12446.4	31128
451837	TXNL1_MOUSE	Txnl1	TXNL1_MOUSE		sp|Q8CDN6|TXNL1_MOUSE Thioredoxin-like protein 1 OS=Mus musculus OX=10090 GN=Txnl1 PE=1 SV=3	77.667	true	2	1	0	9.34	32237	15	3	3	3	3	3	3	3	1	1	3	2	2	3		3	2	0	0	0	0	0	0	0	3	0	60085.2	59691.8	349617	101407	745249	366514		4703653	92822.4	25560.2	7168.33
451378	PSME3_MOUSE	Psme3	PSME3_MOUSE		sp|P61290|PSME3_MOUSE Proteasome activator complex subunit 3 OS=Mus musculus OX=10090 GN=Psme3 PE=1 SV=1	99.325	true	2	1	0	13.78	29506	16	2	2	2	2	3	3	2			1		1			2		0	0	0	0	0	0	0	3	0			18953.3		79969.1			911501		12446.4	12408.4
450554	NPL4_MOUSE	Nploc4	NPL4_MOUSE		sp|P60670|NPL4_MOUSE Nuclear protein localization protein 4 homolog OS=Mus musculus OX=10090 GN=Nploc4 PE=1 SV=3	83.013	true	2	1	0	5.26	68017	35	2	2	2	2	2	2	2			1		2	2		2		0	0	0	0	0	0	0	2	0			10175.6		183467	118902		844343		12446.4	12408.4
450968	NEUA_MOUSE	Cmas	NEUA_MOUSE		sp|Q99KK2|NEUA_MOUSE N-acylneuraminate cytidylyltransferase OS=Mus musculus OX=10090 GN=Cmas PE=1 SV=2	111.327	true	2	1	0	6.71	48058	29	3	3	3	3	5	5	3	1	1	2	1	1	2		2	1	0	0	0	0	1	1	0	2	0	160327	87512.7	160336	37147.7	220740	625435		4.49049e+06	27063.6	12604.4	6163.94
451982	LARP7_MOUSE	Larp7	LARP7_MOUSE		sp|Q05CL8|LARP7_MOUSE La-related protein 7 OS=Mus musculus OX=10090 GN=Larp7 PE=1 SV=2	115.293	true	2	1	0	8.07	64802	36	4	4	4	4	4	4	4	1	2	4	1	4	4	1	4	2	0	0	0	0	0	0	0	4	0	262890	392075	347308	43201.6	2.05408e+06	940105	74408.3	2.48043e+06	381515	15964.6	71454.8
450528	HYEP_MOUSE	Ephx1	HYEP_MOUSE		sp|Q9D379|HYEP_MOUSE Epoxide hydrolase 1 OS=Mus musculus OX=10090 GN=Ephx1 PE=1 SV=2	29.525	true	2	1	0	1.98	52577	32	1	1	1	1	1	1	1								1		0	0	0	0	0	0	0	1	0								4.18207e+06		12446.4	12408.4
450858	UCHL4_MOUSE	Uchl4	UCHL4_MOUSE	UCHL3_MOUSE	sp|P58321|UCHL4_MOUSE Ubiquitin carboxyl-terminal hydrolase isozyme L4 OS=Mus musculus OX=10090 GN=Uchl4 PE=2 SV=1	89.425	true	2	1	1	10.73	26450	15	2	2	2	2	2	2	2			1		1	1		2		0	0	0	0	0	0	0	2	0			24083.7		79167.9	29611		3344024		12446.4	12408.4
451782	CO1A2_MOUSE	Col1a2	CO1A2_MOUSE		sp|Q01149|CO1A2_MOUSE Collagen alpha-2(I) chain OS=Mus musculus OX=10090 GN=Col1a2 PE=1 SV=2	51.439	true	2	1	0	1.31	129557	80	2	2	2	2	7	7	2		1	1		1	1			2	0	0	1	0	0	0	0	0	6		94444.1	621241		44076.9	52995.3			10285670	12446.4	39844.6
452149	HNRPL_MOUSE	Hnrnpl	HNRPL_MOUSE		sp|Q8R081|HNRPL_MOUSE Heterogeneous nuclear ribonucleoprotein L OS=Mus musculus OX=10090 GN=Hnrnpl PE=1 SV=2	176.778	true	2	1	0	9.56	63964	22	4	4	4	4	5	5	4		1	2	1	3	2	1	2		0	0	0	0	2	1	1	1	0		240271	811679	332834	5755638	2142662	146374	4426146		12446.4	8838.69
451483	OST48_MOUSE	Ddost	OST48_MOUSE		sp|O54734|OST48_MOUSE Dolichyl-diphosphooligosaccharide--protein glycosyltransferase 48 kDa subunit OS=Mus musculus OX=10090 GN=Ddost PE=1 SV=2	95.294	true	2	1	0	5.9	49028	25	2	2	2	2	2	2	2		1	1		2	1		2		0	0	0	0	0	0	0	2	0		170939	116873		738933	80390.9		1.51384e+06		12446.4	13814.1
451447	GAPD1_MOUSE	Gapvd1	GAPD1_MOUSE		sp|Q6PAR5|GAPD1_MOUSE GTPase-activating protein and VPS9 domain-containing protein 1 OS=Mus musculus OX=10090 GN=Gapvd1 PE=1 SV=2	94.023	true	2	1	0	1.58	162402	69	2	2	2	2	2	2	2	1	1	1	1				2		0	0	0	0	0	0	0	2	0	175540	98608	67731.1	76500.6				1.83709e+06		31982.9	10501.6
450728	PUR2_MOUSE	Gart	PUR2_MOUSE		sp|Q64737|PUR2_MOUSE Trifunctional purine biosynthetic protein adenosine-3 OS=Mus musculus OX=10090 GN=Gart PE=1 SV=3	34.069	true	2	1	0	0.79	107503	53	1	1	1	1	2	2	1					1	1			1	0	0	0	0	1	0	0	0	1					741213	10267.1			272246	12446.4	12408.4
452092	PTMA_MOUSE	Ptma	PTMA_MOUSE		sp|P26350|PTMA_MOUSE Prothymosin alpha OS=Mus musculus OX=10090 GN=Ptma PE=1 SV=2	115.684	true	2	1	0	21.62	12254	3	2	2	2	2	2	2	2	1	1			2				1	0	0	0	0	2	0	0	0	0	12468.3	55026.9			1.64277e+06				355005	9040.91	17829
451431	NRDC_MOUSE	Nrdc	NRDC_MOUSE		sp|Q8BHG1|NRDC_MOUSE Nardilysin OS=Mus musculus OX=10090 GN=Nrdc PE=1 SV=1	41.043	true	2	1	0	1.46	132891	62	2	2	2	2	2	2	2	1		1		2	1		2		0	0	0	0	0	0	0	2	0	82446.1		39756.2		159030	40472.9		1.06661e+06		16064.4	12408.4
452072	TPPP3_MOUSE	Tppp3	TPPP3_MOUSE		sp|Q9CRB6|TPPP3_MOUSE Tubulin polymerization-promoting protein family member 3 OS=Mus musculus OX=10090 GN=Tppp3 PE=1 SV=1	25.529	true	2	1	0	4.55	18965	14	1	1	1	1	1	1	1				1				1		0	0	0	0	0	0	0	1	0				161099				3.01927e+06		12446.4	12408.4
450763	AMPB_MOUSE	Rnpep	AMPB_MOUSE		sp|Q8VCT3|AMPB_MOUSE Aminopeptidase B OS=Mus musculus OX=10090 GN=Rnpep PE=1 SV=2	64.45	true	2	1	0	3.54	72416	35	2	2	2	2	3	3	2	1	1	2	1	2	2		2	2	0	1	2	0	0	0	0	0	0	279516	464811	573088	104603	1.58888e+06	404856		1.48881e+06	298866	14457	11154.2
451077	SAE2_MOUSE	Uba2	SAE2_MOUSE		sp|Q9Z1F9|SAE2_MOUSE SUMO-activating enzyme subunit 2 OS=Mus musculus OX=10090 GN=Uba2 PE=1 SV=1	45.698	true	2	1	0	2.82	70569	36	2	2	2	2	3	3	2	1	2	2		2	2	2	1	2	0	0	0	0	2	1	0	0	0	741348	398604	622112		1.82956e+06	550181	24900.1	19952874	326589	29694.5	369156
451931	NOMO1_MOUSE	Nomo1	NOMO1_MOUSE		sp|Q6GQT9|NOMO1_MOUSE Nodal modulator 1 OS=Mus musculus OX=10090 GN=Nomo1 PE=1 SV=1	63.601	true	2	1	0	1.57	133420	74	2	2	2	2	3	3	2		1	1		2			2		0	0	0	0	2	0	0	1	0		112616	75296.6		496636			626841		12446.4	8935.49
450755	AL1A1_MOUSE	Aldh1a1	AL1A1_MOUSE	AL1A3_MOUSE; AL1A7_MOUSE	sp|P24549|AL1A1_MOUSE Retinal dehydrogenase 1 OS=Mus musculus OX=10090 GN=Aldh1a1 PE=1 SV=5	73.862	true	2	1	2	5.39	54468	25	3	2	3	2	4	2	2					1			2		0	0	0	0	0	0	0	2	0	55770.9			572587	2.37702e+06	2.37439e+06		6146989	269623	12446.4	12408.4
451352	SF3A3_MOUSE	Sf3a3	SF3A3_MOUSE		sp|Q9D554|SF3A3_MOUSE Splicing factor 3A subunit 3 OS=Mus musculus OX=10090 GN=Sf3a3 PE=1 SV=2	26.707	true	2	1	0	3.19	58842	28	2	2	2	2	3	3	2	1	1	2	1	2	2	1	1	1	0	0	0	1	1	0	0	1	0	367172	155771	378227	761737	1.43716e+06	1.05092e+06	114711	833416	360322	77688.9	17859.6
451953	EWS_MOUSE	Ewsr1	EWS_MOUSE		sp|Q61545|EWS_MOUSE RNA-binding protein EWS OS=Mus musculus OX=10090 GN=Ewsr1 PE=1 SV=2	1.291	true	2	1	0	1.37	68462	23	1	1	1	1	2	2	1	1		1		1	1		1		0	0	0	0	1	1	0	0	0	11084.9		34920.5		933813	658302		3.08522e+06		11084.9	12408.4
451840	RS12_MOUSE	Rps12	RS12_MOUSE		sp|P63323|RS12_MOUSE 40S ribosomal protein S12 OS=Mus musculus OX=10090 GN=Rps12 PE=1 SV=2	48.306	true	2	1	0	13.64	14525	7	2	2	2	2	2	2	2	1		2		2	2		2	2	1	0	0	0	1	0	0	0	0	714626		701284		2.7887e+06	6127312		2238831	6612827	125716	12408.4
451960	DNLI1_MOUSE	Lig1	DNLI1_MOUSE		sp|P37913|DNLI1_MOUSE DNA ligase 1 OS=Mus musculus OX=10090 GN=Lig1 PE=1 SV=2	6.626	true	2	1	0	0.98	102290	54	1	1	1	1	1	1	1		1	1		1				1	0	0	0	0	1	0	0	0	0		6345.04	4831.27		463604				11116	12446.4	3937.66
451011	DLRB2_MOUSE	Dynlrb2	DLRB2_MOUSE		sp|Q9DAJ5|DLRB2_MOUSE Dynein light chain roadblock-type 2 OS=Mus musculus OX=10090 GN=Dynlrb2 PE=1 SV=1	52.803	true	2	1	0	12.5	10875	6	1	1	1	1	1	1	1	1							1	1	0	0	0	0	0	0	0	1	0	222956							1.27525e+06	523560	222956	12408.4
451509	NCKP1_MOUSE	Nckap1	NCKP1_MOUSE		sp|P28660|NCKP1_MOUSE Nck-associated protein 1 OS=Mus musculus OX=10090 GN=Nckap1 PE=1 SV=2	82.482	true	2	1	0	2.66	128784	64	3	3	3	3	3	3	3								3		0	0	0	0	0	0	0	3	0								2.82184e+06		12446.4	12408.4
451443	C1QR1_MOUSE	Cd93	C1QR1_MOUSE		sp|O89103|C1QR1_MOUSE Complement component C1q receptor OS=Mus musculus OX=10090 GN=Cd93 PE=1 SV=1	152.472	true	2	1	0	7.61	69354	25	4	4	4	4	7	7	4	1	1			3	3		3	1	0	0	0	0	3	1	0	3	0	341141	81754.4			4.61001e+06	2.17847e+06		3.81541e+06	77503.1	25746.9	7915.52
451673	JIP3_MOUSE	Mapk8ip3	JIP3_MOUSE; JIP4_MOUSE		sp|Q9ESN9|JIP3_MOUSE C-Jun-amino-terminal kinase-interacting protein 3 OS=Mus musculus OX=10090 GN=Mapk8ip3 PE=1 SV=1	19.599	true	2	2	0	0.6	147561	70	1	1	1	1	1	1	1			1		1	1		1	1	0	0	0	0	0	0	0	1	0			23789.2		229891	46788.3		507209	55634.4	12446.4	12408.4
451645	SRPK1_MOUSE	Srpk1	SRPK1_MOUSE; SRPK2_MOUSE		sp|O70551|SRPK1_MOUSE SRSF protein kinase 1 OS=Mus musculus OX=10090 GN=Srpk1 PE=1 SV=2	9.042	true	2	2	0	1.08	73088	33	1	1	1	1	1	1	1		1	1		1	1	1	1	1	0	0	0	0	0	1	0	0	0		190154	207680		867677	1.12328e+06	14959.2	1.51241e+06	388637	12446.4	118007
451658	CYB5_MOUSE	Cyb5a	CYB5_MOUSE		sp|P56395|CYB5_MOUSE Cytochrome b5 OS=Mus musculus OX=10090 GN=Cyb5a PE=1 SV=2	68.872	true	2	1	0	15.67	15241	8	1	1	1	1	1	1	1								1		0	0	0	0	0	0	0	1	0								2.56739e+06		12446.4	12408.4
450648	HNRPF_MOUSE	Hnrnpf	HNRPF_MOUSE		sp|Q9Z2X1|HNRPF_MOUSE Heterogeneous nuclear ribonucleoprotein F OS=Mus musculus OX=10090 GN=Hnrnpf PE=1 SV=3	222.52	true	2	1	0	15.18	45730	23	4	3	4	3	11	9	3		1	3		3	2	1	3	2	0	0	1	0	2	2	0	3	1		2.31721e+06	2157534		6591003	1.15863e+06	23030.2	4639171	574249	12446.4	42338.8
450866	HUWE1_MOUSE	Huwe1	HUWE1_MOUSE		sp|Q7TMY8|HUWE1_MOUSE E3 ubiquitin-protein ligase HUWE1 OS=Mus musculus OX=10090 GN=Huwe1 PE=1 SV=5	59.406	true	2	1	0	0.41	482635	206	2	2	2	2	2	2	2	1	1	1		2	1		2		0	0	0	0	0	0	0	2	0	256711	100112	82370.3		606042	43314.5		1.49179e+06		19115.1	14002
451877	COF1_MOUSE	Cfl1	COF1_MOUSE	COF2_MOUSE	sp|P18760|COF1_MOUSE Cofilin-1 OS=Mus musculus OX=10090 GN=Cfl1 PE=1 SV=3	190.078	true	2	1	1	27.71	18560	12	4	3	5	3	20	11	3	1	1	3	1	3	2	1	3	3	0	1	0	2	1	1	1	2	3	6338200	14005730	17052024	719335	51614256	11391632	1.66664e+06	47302120	7039260	207690	160587
450967	MPCP_MOUSE	Slc25a3	MPCP_MOUSE		sp|Q8VEM8|MPCP_MOUSE Phosphate carrier protein, mitochondrial OS=Mus musculus OX=10090 GN=Slc25a3 PE=1 SV=1	74.077	true	2	1	0	4.76	39632	20	2	2	2	2	4	4	2		1	2	1	2	2	1	2		0	1	1	0	0	1	0	1	0		623814	786184	131275	1997396	553675	69582.5	1783514		12446.4	17280
451163	GSH1_MOUSE	Gclc	GSH1_MOUSE		sp|P97494|GSH1_MOUSE Glutamate--cysteine ligase catalytic subunit OS=Mus musculus OX=10090 GN=Gclc PE=1 SV=4	181.479	true	2	1	0	8.01	72571	36	5	5	5	5	5	5	4	1		2	1	3			4	1	0	0	0	0	0	0	0	4	0	58098.8		51644.8	18563.9	157692			4.96063e+06	15741.3	20386.6	12408.4
451697	S14L1_MOUSE	Sec14l1	S14L1_MOUSE		sp|A8Y5H7|S14L1_MOUSE SEC14-like protein 1 OS=Mus musculus OX=10090 GN=Sec14l1 PE=1 SV=1	115.822	true	2	1	0	5.17	81214	44	3	3	3	3	3	3	3		1						3		0	0	0	0	0	0	0	3	0		449465						955768		12446.4	12789.6
450639	ABEC3_MOUSE	Apobec3	ABEC3_MOUSE		sp|Q99J72|ABEC3_MOUSE DNA dC->dU-editing enzyme APOBEC-3 OS=Mus musculus OX=10090 GN=Apobec3 PE=1 SV=3	218.747	true	2	1	0	12.5	52212	28	6	6	6	6	9	9	6	2	1	3	3	4	4		3	4	0	0	0	2	0	3	0	1	3	3.26601e+06	515620	862082	1.82383e+06	8017338	9120630		3921066	3.73712e+06	179644	28192.9
450942	ZN207_MOUSE	Znf207	ZN207_MOUSE		sp|Q9JMD0|ZN207_MOUSE BUB3-interacting and GLEBS motif-containing protein ZNF207 OS=Mus musculus OX=10090 GN=Znf207 PE=1 SV=1	59.134	true	2	1	0	5.05	52793	18	2	2	2	2	2	2	2	1	1	2	1	2	2		2	1	0	0	0	0	0	0	0	2	0	14684.1	74624.8	334059	16397.3	1342117	282484		1.19979e+06	94745.6	6788.87	9833.69
451826	DIAP1_MOUSE	Diaph1	DIAP1_MOUSE		sp|O08808|DIAP1_MOUSE Protein diaphanous homolog 1 OS=Mus musculus OX=10090 GN=Diaph1 PE=1 SV=1	61.779	true	2	1	0	1.99	139343	71	2	2	2	2	2	2	2	1	2	2		2	2	1	2	2	0	0	0	0	2	0	0	0	0	72939.4	261574	207371		732067	238306	27827.3	516545	435435	8281.07	145726
452107	PRKDC_MOUSE	Prkdc	PRKDC_MOUSE		sp|P97313|PRKDC_MOUSE DNA-dependent protein kinase catalytic subunit OS=Mus musculus OX=10090 GN=Prkdc PE=1 SV=3	38.011	true	2	1	0	0.39	471465	249	2	2	2	2	2	2	2	1	1	1		2			2		0	0	0	0	0	0	0	2	0	226865	32585.5	26994.4		100660			1.60273e+06		47573.9	8805.46
451955	MOV10_MOUSE	Mov10	MOV10_MOUSE		sp|P23249|MOV10_MOUSE Putative helicase MOV-10 OS=Mus musculus OX=10090 GN=Mov10 PE=1 SV=2	248.25	true	2	1	0	7.17	113583	63	8	8	8	8	12	12	7	6	3	2	5	7	7		7	4	0	0	0	0	3	2	0	6	0	1.33546e+06	558768	378409	1.32554e+06	7297624	6550739		7.34898e+06	860886	1.25004e+06	29119
450773	S27A4_MOUSE	Slc27a4	S27A4_MOUSE		sp|Q91VE0|S27A4_MOUSE Long-chain fatty acid transport protein 4 OS=Mus musculus OX=10090 GN=Slc27a4 PE=1 SV=1	25.381	true	2	1	0	1.24	72319	38	1	1	1	1	1	1	1			1		1			1		0	0	0	0	0	0	0	1	0			25236.7		24565.3			1.87664e+06		12446.4	12408.4
451811	GRB2_MOUSE	Grb2	GRB2_MOUSE		sp|Q60631|GRB2_MOUSE Growth factor receptor-bound protein 2 OS=Mus musculus OX=10090 GN=Grb2 PE=1 SV=1	53.536	true	2	1	0	10.14	25238	19	2	2	2	2	2	2	2	1	1	1		1	2		2		0	0	1	0	1	0	0	0	0	266740	312624	447188		456754	592040		1.42221e+06		19748.2	13614.2
450833	TBB6_MOUSE	Tubb6	TBB6_MOUSE	TBB1_MOUSE	sp|Q922F4|TBB6_MOUSE Tubulin beta-6 chain OS=Mus musculus OX=10090 GN=Tubb6 PE=1 SV=1	194.919	true	2	1	1	8.72	50090	23	4	2	5	2	28	2	2			1		1	1		2		0	0	0	0	0	0	0	2	0	3213000	4038730	3.43536e+06	904919	7.83945e+06	3514974		37132968	4336243	12446.4	12408.4
451669	MBB1A_MOUSE	Mybbp1a	MBB1A_MOUSE		sp|Q7TPV4|MBB1A_MOUSE Myb-binding protein 1A OS=Mus musculus OX=10090 GN=Mybbp1a PE=1 SV=2	74.8	true	2	1	0	2.31	152037	81	2	2	2	2	3	3	2			2		2	2		2	2	0	0	1	0	0	1	0	0	0			379863		838140	523126		942788	242658	12446.4	12408.4
451962	ES8L1_MOUSE	Eps8l1	ES8L1_MOUSE		sp|Q8R5F8|ES8L1_MOUSE Epidermal growth factor receptor kinase substrate 8-like protein 1 OS=Mus musculus OX=10090 GN=Eps8l1 PE=1 SV=1	87.598	true	2	1	0	3.91	80026	43	3	3	3	3	3	3	3	1			1	1			3	1	0	0	0	0	0	0	0	3	0	41170.5			33532.9	37128.4			1.94812e+06	10612.6	16741.8	12408.4
451770	PAIRB_MOUSE	Serbp1	PAIRB_MOUSE		sp|Q9CY58|PAIRB_MOUSE Plasminogen activator inhibitor 1 RNA-binding protein OS=Mus musculus OX=10090 GN=Serbp1 PE=1 SV=2	37.883	true	2	1	0	2.46	44714	21	1	1	1	1	1	1	1			1	1	1	1		1	1	0	0	0	0	1	0	0	0	0			200496	315098	890921	320607		690103	261729	12446.4	12408.4
451983	SNR40_MOUSE	Snrnp40	SNR40_MOUSE		sp|Q6PE01|SNR40_MOUSE U5 small nuclear ribonucleoprotein 40 kDa protein OS=Mus musculus OX=10090 GN=Snrnp40 PE=1 SV=1	62.219	true	2	1	0	6.15	39276	17	2	2	2	2	2	2	2	1			1	1			2		0	0	0	0	1	0	0	1	0	88599.8			182363	379884			1.23026e+06		20272.5	12408.4
451558	FKBP3_MOUSE	Fkbp3	FKBP3_MOUSE		sp|Q62446|FKBP3_MOUSE Peptidyl-prolyl cis-trans isomerase FKBP3 OS=Mus musculus OX=10090 GN=Fkbp3 PE=1 SV=2	48.603	true	2	1	0	4.91	25148	15	1	1	1	1	4	4	1		1	1		1	1	1	1	1	0	1	1	0	1	0	0	1	0		246826	188461		884405	326364	47127.5	988552	164285	12446.4	153178
450918	UHRF1_MOUSE	Uhrf1	UHRF1_MOUSE		sp|Q8VDF2|UHRF1_MOUSE E3 ubiquitin-protein ligase UHRF1 OS=Mus musculus OX=10090 GN=Uhrf1 PE=1 SV=2	26.647	true	2	1	0	1.28	88304	49	1	1	1	1	1	1	1	1	1	1	1	1	1		1	1	0	0	0	0	0	1	0	0	0	60230	69766.6	80906.3	29637.9	374908	134823		8.18031e+06	142833	60230	43296.3
451841	UB2L3_MOUSE	Ube2l3	UB2L3_MOUSE		sp|P68037|UB2L3_MOUSE Ubiquitin-conjugating enzyme E2 L3 OS=Mus musculus OX=10090 GN=Ube2l3 PE=1 SV=1	63.437	true	2	1	0	10.39	17861	8	2	2	2	2	3	3	2	1	2	1	2	2	1	2	2	1	0	0	0	0	1	0	0	2	0	357257	1.09332e+06	891715	334212	2.17412e+06	731555	23498.3	2.96608e+06	452314	84072.8	710101
450798	PSME2_MOUSE	Psme2	PSME2_MOUSE		sp|P97372|PSME2_MOUSE Proteasome activator complex subunit 2 OS=Mus musculus OX=10090 GN=Psme2 PE=1 SV=4	55.782	true	2	1	0	7.95	27057	18	2	2	2	2	2	2	2	1	1	2		2	2		2	2	0	0	0	0	0	1	0	1	0	31962.9	105959	961323		1.38143e+06	568508		2.50749e+06	74817.6	8912.93	8960.6
452160	MYO5A_MOUSE	Myo5a	MYO5A_MOUSE		sp|Q99104|MYO5A_MOUSE Unconventional myosin-Va OS=Mus musculus OX=10090 GN=Myo5a PE=1 SV=2	116.465	true	2	1	0	1.94	215538	115	3	3	3	3	5	5	3	1	1	2		3	2		3	1	0	0	0	0	0	2	0	2	1	127948	109694	180716		589801	935122		1.14276e+06	401577	16430.5	11567.5
451691	SPB13_MOUSE	Serpinb13	SPB13_MOUSE		sp|Q8CDC0|SPB13_MOUSE Serpin B13 OS=Mus musculus OX=10090 GN=Serpinb13 PE=2 SV=2	87.201	true	2	1	0	6.68	44316	22	2	2	2	2	3	3	2		1	1		1	2		2		0	0	0	0	0	0	0	3	0		68719.9	93401.1		197804	198777		9324065		12446.4	30102.5
451766	AQR_MOUSE	Aqr	AQR_MOUSE		sp|Q8CFQ3|AQR_MOUSE RNA helicase aquarius OS=Mus musculus OX=10090 GN=Aqr PE=1 SV=2	61.825	true	2	1	0	1.49	170291	79	2	2	2	2	3	3	2	1	1	2		2	2	1	2	1	0	0	0	0	1	1	0	1	0	163693	5.11427e+06	2.80889e+06		845674	3821932	1.07795e+06	993186	116142	30187.6	141097
450642	RBMX_MOUSE	Rbmx	RBMX_MOUSE; RMXL1_MOUSE		sp|Q9WV02|RBMX_MOUSE RNA-binding motif protein, X chromosome OS=Mus musculus OX=10090 GN=Rbmx PE=1 SV=1	69.267	true	2	2	0	5.37	42301	34	2	2	2	2	3	3	2	1	2	2	1	1	1		2	1	0	1	1	0	1	0	0	0	0	77886.9	564133	579036	97875.6	3.50548e+06	412666		3.03897e+06	1.01058e+06	30277.3	257132
450519	CTNB1_MOUSE	Ctnnb1	CTNB1_MOUSE		sp|Q02248|CTNB1_MOUSE Catenin beta-1 OS=Mus musculus OX=10090 GN=Ctnnb1 PE=1 SV=1	94.787	true	2	1	0	5.12	85471	43	4	2	4	2	10	5	2	2	1	2	1	2	2	1	2	1	0	1	0	1	1	0	1	1	0	6.1691e+06	30421152	2.93056e+06	2.54281e+06	2046794	2.90668e+06	3.9309e+06	15250341	1.02842e+06	654846	663778
451154	SYSC_MOUSE	Sars1	SYSC_MOUSE		sp|P26638|SYSC_MOUSE Serine--tRNA ligase, cytoplasmic OS=Mus musculus OX=10090 GN=Sars1 PE=1 SV=3	132.691	true	2	1	0	7.03	58389	30	3	3	3	3	5	5	3	1	1	2	1	3	2		3	1	0	0	0	0	1	0	0	4	0	133268	152498	301588	111057	1255894	225533		5633597	69144.1	14505.2	9753.12
450807	RAB5A_MOUSE	Rab5a	RAB5A_MOUSE		sp|Q9CQD1|RAB5A_MOUSE Ras-related protein Rab-5A OS=Mus musculus OX=10090 GN=Rab5a PE=1 SV=1	130.2	true	2	1	0	20.47	23599	14	3	2	3	2	4	3	2		1			2			2		0	0	0	0	1	0	0	2	0	324867	134513	269974		1.00183e+06	273131		4369663		12446.4	9624.02
451240	CRYAB_MOUSE	Cryab	CRYAB_MOUSE		sp|P23927|CRYAB_MOUSE Alpha-crystallin B chain OS=Mus musculus OX=10090 GN=Cryab PE=1 SV=2	51.753	true	2	1	0	14.86	20068	13	1	1	1	1	1	1	1				1				1		0	0	0	0	0	0	0	1	0				299183				1.63187e+06		12446.4	12408.4
451945	SPCS2_MOUSE	Spcs2	SPCS2_MOUSE		sp|Q9CYN2|SPCS2_MOUSE Signal peptidase complex subunit 2 OS=Mus musculus OX=10090 GN=Spcs2 PE=1 SV=1	19.472	true	2	1	0	3.98	24978	14	1	1	1	1	1	1	1					1				1	0	0	0	0	1	0	0	0	0					358063				121314	12446.4	12408.4
452057	RRBP1_MOUSE	Rrbp1	RRBP1_MOUSE		sp|Q99PL5|RRBP1_MOUSE Ribosome-binding protein 1 OS=Mus musculus OX=10090 GN=Rrbp1 PE=1 SV=2	1278.19	true	2	1	0	37.82	172879	130	34	34	34	34	88	88	33	16	13	15	20	21	22	13	20	20	12	3	1	11	11	12	17	9	11	48562936	3.03647e+06	2.91873e+06	45979404	42831764	34845552	11875617	35773440	13089188	53200804	1.03777e+06
451312	RASL1_MOUSE	Rasal1	RASL1_MOUSE		sp|Q9Z268|RASL1_MOUSE RasGAP-activating-like protein 1 OS=Mus musculus OX=10090 GN=Rasal1 PE=1 SV=2	82.021	true	2	1	0	3.5	89393	49	3	3	3	3	4	4	2	1		1		1	1		2		0	0	0	0	0	1	0	2	0	152193		64131.5		77283.3	147815		1.04352e+06		14072.3	12408.4
451665	PK1IP_MOUSE	Pak1ip1	PK1IP_MOUSE		sp|Q9DCE5|PK1IP_MOUSE p21-activated protein kinase-interacting protein 1 OS=Mus musculus OX=10090 GN=Pak1ip1 PE=1 SV=2	54.039	true	2	1	0	4.45	42116	23	2	2	2	2	3	3	2			2	1	2	2		2	2	0	0	0	0	2	1	0	0	0			328776	235692	1.02789e+06	607256		635047	149642	12446.4	12408.4
450898	STAT3_MOUSE	Stat3	STAT3_MOUSE		sp|P42227|STAT3_MOUSE Signal transducer and activator of transcription 3 OS=Mus musculus OX=10090 GN=Stat3 PE=1 SV=2	30.941	true	2	1	0	1.17	88054	48	1	1	1	1	1	1	1				1	1	1	1		1	0	0	0	0	1	0	0	0	0				27014.6	189858	25773.1	8572.23		51574.3	12446.4	12408.4
451619	COX7C_MOUSE	Cox7c	COX7C_MOUSE		sp|P17665|COX7C_MOUSE Cytochrome c oxidase subunit 7C, mitochondrial OS=Mus musculus OX=10090 GN=Cox7c PE=1 SV=1	25.606	true	2	1	0	14.29	7332	5	1	1	1	1	1	1	1	1							1	1	0	0	0	0	0	0	0	1	0	220307							4.07335e+06	86381.7	220307	12408.4
450550	AINX_MOUSE	Ina	AINX_MOUSE	NFM_MOUSE	sp|P46660|AINX_MOUSE Alpha-internexin OS=Mus musculus OX=10090 GN=Ina PE=1 SV=3	75.409	true	2	1	1	3.79	55383	38	2	1	2	1	3	1	1					1			1	1	0	0	0	0	0	0	0	1	0	3.38304e+06	1.99438e+06	2954595	10443065	15647085	3.45909e+06	6148.09	8369928	34854.6	12446.4	12408.4
451421	SH3L3_MOUSE	Sh3bgrl3	SH3L3_MOUSE		sp|Q91VW3|SH3L3_MOUSE SH3 domain-binding glutamic acid-rich-like protein 3 OS=Mus musculus OX=10090 GN=Sh3bgrl3 PE=1 SV=1	131.489	true	2	1	0	31.18	10477	4	3	3	3	3	6	6	3	1	1	1	1	1	1		3	1	0	1	1	1	1	0	0	2	0	125713	771530	654993	420472	2.47729e+06	558913		13933418	780092	115101	82912.8
450715	1433T_MOUSE	Ywhaq	1433T_MOUSE		sp|P68254|1433T_MOUSE 14-3-3 protein theta OS=Mus musculus OX=10090 GN=Ywhaq PE=1 SV=1	214.835	true	2	1	0	24.08	27778	18	6	2	6	2	15	3	2	1	2	2	1	2	2		2	1	0	0	0	0	1	1	0	1	0	5.8112e+06	16630296	9572074	938914	31446352	7.69508e+06	485323	387708384	5032729	7988.25	768988
451121	DDX1_MOUSE	Ddx1	DDX1_MOUSE		sp|Q91VR5|DDX1_MOUSE ATP-dependent RNA helicase DDX1 OS=Mus musculus OX=10090 GN=Ddx1 PE=1 SV=1	73.816	true	2	1	0	2.7	82500	46	2	2	2	2	2	2	2	1	1	2	2	2	2		1	1	0	0	0	0	1	0	0	1	0	107295	223100	530861	281300	974896	389391		1.48425e+06	94997.2	10832.3	8807.95
451291	COX41_MOUSE	Cox4i1	COX41_MOUSE		sp|P19783|COX41_MOUSE Cytochrome c oxidase subunit 4 isoform 1, mitochondrial OS=Mus musculus OX=10090 GN=Cox4i1 PE=1 SV=2	70.123	true	2	1	0	13.02	19530	12	2	2	2	2	5	5	2		2	2		2	1	1	2	1	0	0	1	0	2	0	0	2	0		2.54084e+06	2.84871e+06		6.25502e+06	688508	295503	2585151	427963	12446.4	1420721
451253	SART3_MOUSE	Sart3	SART3_MOUSE		sp|Q9JLI8|SART3_MOUSE Squamous cell carcinoma antigen recognized by T-cells 3 OS=Mus musculus OX=10090 GN=Sart3 PE=1 SV=1	119.578	true	2	1	0	3.64	109619	57	3	3	3	3	4	4	2	2	1	2	1	2	1	1	2	1	0	0	0	0	2	0	0	1	0	198022	89394.6	103776	147978	901244	96821.5	11401.6	1.42693e+06	173476	116535	17239.4
451306	PP4R1_MOUSE	Ppp4r1	PP4R1_MOUSE		sp|Q8K2V1|PP4R1_MOUSE Serine/threonine-protein phosphatase 4 regulatory subunit 1 OS=Mus musculus OX=10090 GN=Ppp4r1 PE=1 SV=2	22.203	true	2	1	0	1.05	106296	49	1	1	1	1	1	1	1			1		1		1	1	1	0	0	0	0	0	0	0	1	0			21135.8		53061.8		6277.57	557458	14540.8	12446.4	12408.4
450820	G3BP1_MOUSE	G3bp1	G3BP1_MOUSE		sp|P97855|G3BP1_MOUSE Ras GTPase-activating protein-binding protein 1 OS=Mus musculus OX=10090 GN=G3bp1 PE=1 SV=1	45.762	true	2	1	0	2.37	51829	27	1	1	1	1	2	2	1		1	1	1		1	1	1	1	0	1	0	1	0	0	0	0	0		378423	328979	353847		289626	95212.5	423874	365737	12446.4	234845
450889	PFKAM_MOUSE	Pfkm	PFKAM_MOUSE		sp|P47857|PFKAM_MOUSE ATP-dependent 6-phosphofructokinase, muscle type OS=Mus musculus OX=10090 GN=Pfkm PE=1 SV=3	56.622	true	2	1	0	3.85	85269	40	3	2	3	2	3	2	2			2		1			2		0	0	0	0	0	0	0	2	0			66238.6		134877			2.05248e+06		12446.4	12408.4
451320	SUCA_MOUSE	Suclg1	SUCA_MOUSE		sp|Q9WUM5|SUCA_MOUSE Succinate--CoA ligase [ADP/GDP-forming] subunit alpha, mitochondrial OS=Mus musculus OX=10090 GN=Suclg1 PE=1 SV=4	22.281	true	2	1	0	2.6	36155	15	1	1	1	1	1	1	1								1		0	0	0	0	0	0	0	1	0								1.36976e+06		12446.4	12408.4
450796	RU17_MOUSE	Snrnp70	RU17_MOUSE		sp|Q62376|RU17_MOUSE U1 small nuclear ribonucleoprotein 70 kDa OS=Mus musculus OX=10090 GN=Snrnp70 PE=1 SV=2	70.56	true	2	1	0	5.8	51992	19	3	3	3	3	3	3	3	1	2	2	1	3	2	2	3	2	0	0	0	0	2	0	0	1	0	144797	832848	625197	238417	3.17182e+06	561312	40370.6	2.27431e+06	429735	13570.4	393838
450627	DDX17_MOUSE	Ddx17	DDX17_MOUSE		sp|Q501J6|DDX17_MOUSE Probable ATP-dependent RNA helicase DDX17 OS=Mus musculus OX=10090 GN=Ddx17 PE=1 SV=1	228.904	true	2	1	0	7.85	72399	36	5	2	6	2	16	7	2	1	1	2	1	2	2		2	1	0	1	1	0	1	2	0	2	0	2.66966e+06	2.76992e+06	4.84533e+06	1.2176e+06	8588896	8000265	32691.5	15370950	4.34581e+06	28907.2	6672.23
451258	EXOC3_MOUSE	Exoc3	EXOC3_MOUSE		sp|Q6KAR6|EXOC3_MOUSE Exocyst complex component 3 OS=Mus musculus OX=10090 GN=Exoc3 PE=1 SV=2	25.24	true	2	1	0	1.46	86455	42	1	1	1	1	1	1	1								1	1	0	0	0	0	0	0	0	1	0								580837	30490.7	12446.4	12408.4
450868	VATC2_MOUSE	Atp6v1c2	VATC2_MOUSE	VATC1_MOUSE	sp|Q99L60|VATC2_MOUSE V-type proton ATPase subunit C 2 OS=Mus musculus OX=10090 GN=Atp6v1c2 PE=1 SV=1	133.073	true	2	1	1	9.13	48350	30	4	4	4	4	4	4	4	1	1	3		2	2		4	1	0	0	0	0	0	0	0	4	0	180137	166058	288161		540837	221124		5669641	19173.9	20571.4	12590.1
451257	CCR5_MOUSE	Ccr5	CCR5_MOUSE		sp|P51682|CCR5_MOUSE C-C chemokine receptor type 5 OS=Mus musculus OX=10090 GN=Ccr5 PE=2 SV=3	32.769	true	2	1	0	3.11	40785	12	1	1	1	1	1	1	1	1			1	1	1	1	1	1	0	0	0	0	0	0	0	0	1	187482			439518	925559	605739	5701.91	651142	257341	187482	12408.4
451796	RL17_MOUSE	Rpl17	RL17_MOUSE		sp|Q9CPR4|RL17_MOUSE 60S ribosomal protein L17 OS=Mus musculus OX=10090 GN=Rpl17 PE=1 SV=3	156.679	true	2	1	0	26.63	21423	11	4	4	4	4	14	14	4	2	1	2	2	3	3	1	3	3	1	2	1	2	3	0	1	1	3	1.56556e+06	187982	4941365	4.48411e+06	5539608	2.98495e+06	310134	4919653	3391958	1168286	35004.2
451147	NQO1_MOUSE	Nqo1	NQO1_MOUSE		sp|Q64669|NQO1_MOUSE NAD(P)H dehydrogenase [quinone] 1 OS=Mus musculus OX=10090 GN=Nqo1 PE=1 SV=3	31.69	true	2	1	0	2.92	30960	15	1	1	1	1	1	1	1					1			1		0	0	0	0	0	0	0	1	0					44309.9			1.22617e+06		12446.4	12408.4
451325	IPO5_MOUSE	Ipo5	IPO5_MOUSE		sp|Q8BKC5|IPO5_MOUSE Importin-5 OS=Mus musculus OX=10090 GN=Ipo5 PE=1 SV=3	35.947	true	2	1	0	1.82	123591	57	1	1	1	1	1	1	1			1		1	1		1		0	0	0	0	0	0	0	1	0			14220.5		151053	76887.5		593231		12446.4	12408.4
451741	LRRF2_MOUSE	Lrrfip2	LRRF2_MOUSE		sp|Q91WK0|LRRF2_MOUSE Leucine-rich repeat flightless-interacting protein 2 OS=Mus musculus OX=10090 GN=Lrrfip2 PE=1 SV=1	60.659	true	2	1	0	5.3	47148	23	2	2	2	2	2	2	2	1			1		1		2	1	0	0	0	0	0	0	0	2	0	3.23046e+06			1.57712e+06		2.04307e+06		1.28227e+06	52999.5	962736	12408.4
451211	LRSM1_MOUSE	Lrsam1	LRSM1_MOUSE		sp|Q80ZI6|LRSM1_MOUSE E3 ubiquitin-protein ligase LRSAM1 OS=Mus musculus OX=10090 GN=Lrsam1 PE=1 SV=1	55.422	true	2	1	0	3.58	83975	50	2	2	2	2	2	2	2	1	1	2		2	2		2	1	0	0	0	0	0	0	0	2	0	1.16025e+06	64647.1	180046		436819	382436		1.44603e+06	24268.8	82457.7	16447.7
451950	MIC19_MOUSE	Chchd3	MIC19_MOUSE		sp|Q9CRB9|MIC19_MOUSE MICOS complex subunit Mic19 OS=Mus musculus OX=10090 GN=Chchd3 PE=1 SV=1	78.458	true	2	1	0	7.49	26335	17	2	2	2	2	4	4	2	1	1	2	1	2	2	1	2	2	0	0	0	0	1	0	0	2	1	579133	93833	307446	247873	1.25168e+06	210473	5012.22	1.48307e+06	213000	61316.8	15749.4
450699	EMD_MOUSE	Emd	EMD_MOUSE		sp|O08579|EMD_MOUSE Emerin OS=Mus musculus OX=10090 GN=Emd PE=1 SV=1	60.203	true	2	1	0	8.11	29436	12	2	2	2	2	2	2	2				1	2			1		0	0	0	0	1	0	0	1	0				52584.3	301548			463591		12446.4	12408.4
451827	HIP1R_MOUSE	Hip1r	HIP1R_MOUSE		sp|Q9JKY5|HIP1R_MOUSE Huntingtin-interacting protein 1-related protein OS=Mus musculus OX=10090 GN=Hip1r PE=1 SV=2	68.538	true	2	1	0	2.34	119426	79	2	2	2	2	2	2	2	1				1	1		2		0	0	0	0	0	0	0	2	0	74377.7				97617.1	84466.9		1.51667e+06		23106.6	12408.4
451604	RRP1B_MOUSE	Rrp1b	RRP1B_MOUSE		sp|Q91YK2|RRP1B_MOUSE Ribosomal RNA processing protein 1 homolog B OS=Mus musculus OX=10090 GN=Rrp1b PE=1 SV=2	26.354	true	2	1	0	1.52	80582	45	1	1	1	1	1	1	1		1	1		1	1		1	1	0	0	0	0	1	0	0	0	0		33909.4	47738		364615	10921.4		240672	172149	12446.4	21043.8
451313	SERF2_MOUSE	Serf2	SERF2_MOUSE		sp|P84102|SERF2_MOUSE Small EDRK-rich factor 2 OS=Mus musculus OX=10090 GN=Serf2 PE=1 SV=1	13.694	true	2	1	0	15.25	6899	3	1	1	1	1	1	1	1			1		1	1		1	1	0	0	1	0	0	0	0	0	0			205522		690256	203012		338990	300563	12446.4	12408.4
451804	SMCA4_MOUSE	Smarca4	SMCA4_MOUSE	SMCA2_MOUSE	sp|Q3TKT4|SMCA4_MOUSE Transcription activator BRG1 OS=Mus musculus OX=10090 GN=Smarca4 PE=1 SV=1	47.471	true	2	1	1	1.36	181427	72	2	2	2	2	2	2	2	1	1	1		1	1		2	1	0	0	0	0	0	1	0	1	0	220773	514753	224703		840350	289489		1.72459e+06	154630	47676.8	61365.1
451330	KC1A_MOUSE	Csnk1a1	KC1A_MOUSE		sp|Q8BK63|KC1A_MOUSE Casein kinase I isoform alpha OS=Mus musculus OX=10090 GN=Csnk1a1 PE=1 SV=2	98.445	true	2	1	0	8.61	38914	21	3	3	3	3	3	3	3	1		2		1	2		3		0	0	0	0	0	0	0	3	0	116922		311635		304383	270846		6601434		7016.18	12408.4
451241	GBB1_MOUSE	Gnb1	GBB1_MOUSE; GBB2_MOUSE; GBB4_MOUSE	GBB3_MOUSE	sp|P62874|GBB1_MOUSE Guanine nucleotide-binding protein G(I)/G(S)/G(T) subunit beta-1 OS=Mus musculus OX=10090 GN=Gnb1 PE=1 SV=3	42.752	true	2	3	1	6.18	37376	13	2	2	2	2	5	5	2	2	2	2	2	2	2	1	2	1	0	1	0	1	1	0	1	1	0	2867350	774545	495084	1.79689e+06	1.62055e+06	2.49556e+06	341029	2.13922e+06	1.27968e+06	1704654	292587
450655	CSN4_MOUSE	Cops4	CSN4_MOUSE		sp|O88544|CSN4_MOUSE COP9 signalosome complex subunit 4 OS=Mus musculus OX=10090 GN=Cops4 PE=1 SV=1	27.819	true	2	1	0	2.96	46285	28	1	1	1	1	1	1	1					1			1		0	0	0	0	0	0	0	1	0					294450			1.06071e+06		12446.4	12408.4
450712	ODO2_MOUSE	Dlst	ODO2_MOUSE		sp|Q9D2G2|ODO2_MOUSE Dihydrolipoyllysine-residue succinyltransferase component of 2-oxoglutarate dehydrogenase complex, mitochondrial OS=Mus musculus OX=10090 GN=Dlst PE=1 SV=1	68.474	true	2	1	0	6.17	48995	26	3	3	3	3	3	3	2		1	2		2	2		2		0	0	0	0	0	0	0	2	0		222472	392675		1.67947e+06	806035		3.72591e+06		12446.4	7606.15
451037	TWF1_MOUSE	Twf1	TWF1_MOUSE		sp|Q91YR1|TWF1_MOUSE Twinfilin-1 OS=Mus musculus OX=10090 GN=Twf1 PE=1 SV=2	42.208	true	2	1	0	6	40079	20	2	2	2	2	2	2	2		1	2		2			2	1	0	0	0	0	0	0	0	2	0		203689	64231.6		233183			1.6757e+06	39898.9	12446.4	20937.1
450517	H11_MOUSE	H1-1	H11_MOUSE		sp|P43275|H11_MOUSE Histone H1.1 OS=Mus musculus OX=10090 GN=H1-1 PE=1 SV=2	558.498	true	2	1	0	41.78	21785	8	11	8	12	9	67	43	9	5	4	7	4	6	4	3	9	5	4	2	4	5	4	2	4	14	4	27688988	151409040	60442172	18239060	464928064	103017800	137970016	1139715072	38037672	12616051	768624
451166	VATE1_MOUSE	Atp6v1e1	VATE1_MOUSE	VATE2_MOUSE	sp|P50518|VATE1_MOUSE V-type proton ATPase subunit E 1 OS=Mus musculus OX=10090 GN=Atp6v1e1 PE=1 SV=2	121.811	true	2	1	1	11.5	26157	16	3	3	3	3	4	4	3	2	2	2	2	1	2	2	3	2	0	1	0	0	0	1	0	2	0	311881	326913	516165	415330	781209	359850	9219.86	9368041	236403	138519	188719
451051	RAB25_MOUSE	Rab25	RAB25_MOUSE		sp|Q9WTL2|RAB25_MOUSE Ras-related protein Rab-25 OS=Mus musculus OX=10090 GN=Rab25 PE=1 SV=2	63.026	true	2	1	0	8.45	23473	14	2	1	2	1	5	1	1								1		0	0	0	0	0	0	0	1	0	1.54439e+06	1297223	983297	749064	2.15234e+06	156367		12107606	170125	12446.4	12408.4
451280	KAD1_MOUSE	Ak1	KAD1_MOUSE		sp|Q9R0Y5|KAD1_MOUSE Adenylate kinase isoenzyme 1 OS=Mus musculus OX=10090 GN=Ak1 PE=1 SV=1	34.766	true	2	1	0	6.19	21539	14	1	1	1	1	1	1	1			1					1		0	0	0	0	0	0	0	1	0			32145.8					1.04215e+06		12446.4	12408.4
451680	VAMP8_MOUSE	Vamp8	VAMP8_MOUSE		sp|O70404|VAMP8_MOUSE Vesicle-associated membrane protein 8 OS=Mus musculus OX=10090 GN=Vamp8 PE=1 SV=1	27.987	true	2	1	0	9.9	11451	6	1	1	1	1	1	1	1					1			1		0	0	0	0	0	0	0	1	0					1.05318e+06			944825		12446.4	12408.4
450741	TOM1_MOUSE	Tom1	TOM1_MOUSE		sp|O88746|TOM1_MOUSE Target of Myb protein 1 OS=Mus musculus OX=10090 GN=Tom1 PE=1 SV=1	24.098	true	2	1	0	2.24	54325	23	1	1	1	1	1	1	1								1		0	0	0	0	0	0	0	1	0								943003		12446.4	12408.4
451823	PLAP_MOUSE	Plaa	PLAP_MOUSE		sp|P27612|PLAP_MOUSE Phospholipase A-2-activating protein OS=Mus musculus OX=10090 GN=Plaa PE=1 SV=4	58.278	true	2	1	0	1.89	87221	51	1	1	1	1	1	1	1					1			1		0	0	0	0	0	0	0	1	0					285359			922529		12446.4	12408.4
451112	CCR1_MOUSE	Ccr1	CCR1_MOUSE		sp|P51675|CCR1_MOUSE C-C chemokine receptor type 1 OS=Mus musculus OX=10090 GN=Ccr1 PE=2 SV=2	46.972	true	2	1	0	3.38	40895	13	1	1	1	1	1	1	1						1		1		0	0	0	0	0	0	0	1	0						238059		907090		12446.4	12408.4
451473	GSK3B_MOUSE	Gsk3b	GSK3B_MOUSE		sp|Q9WV60|GSK3B_MOUSE Glycogen synthase kinase-3 beta OS=Mus musculus OX=10090 GN=Gsk3b PE=1 SV=2	25.118	true	2	1	0	5.71	46709	25	1	1	1	1	1	1	1								1		0	0	0	0	0	0	0	1	0								899772		12446.4	12408.4
451952	SNW1_MOUSE	Snw1	SNW1_MOUSE		sp|Q9CSN1|SNW1_MOUSE SNW domain-containing protein 1 OS=Mus musculus OX=10090 GN=Snw1 PE=1 SV=3	116.441	true	2	1	0	7.46	61475	35	3	3	3	3	4	4	3	1		2	1	2	2		3	1	0	0	0	0	0	2	0	1	1	121601		202663	48808.5	670617	1.05784e+06		915891	159964	35263.9	12408.4
451290	PPCE_MOUSE	Prep	PPCE_MOUSE		sp|Q9QUR6|PPCE_MOUSE Prolyl endopeptidase OS=Mus musculus OX=10090 GN=Prep PE=1 SV=1	80.866	true	2	1	0	2.96	80752	49	2	2	2	2	3	3	2	2	1	1		2	1		2		0	0	0	0	2	0	0	1	0	220854	124873	179317		968638	164971		2.67153e+06		51019	15472.7
451535	UBE3C_MOUSE	Ube3c	UBE3C_MOUSE		sp|Q80U95|UBE3C_MOUSE Ubiquitin-protein ligase E3C OS=Mus musculus OX=10090 GN=Ube3c PE=1 SV=2	94.104	true	2	1	0	2.68	123974	61	2	2	2	2	2	2	2	1	1	1		1			2		0	0	0	0	0	0	0	2	0	92553.4	59280.5	22681.2		36360.9			508278		34589	13856.1
450789	RL10A_MOUSE	Rpl10a	RL10A_MOUSE		sp|P53026|RL10A_MOUSE 60S ribosomal protein L10a OS=Mus musculus OX=10090 GN=Rpl10a PE=1 SV=3	219.908	true	2	1	0	19.82	24916	13	6	6	6	6	40	40	6	4	4	4	5	5	5	2	5	3	2	1	1	12	4	4	2	5	9	46134976	5.23305e+06	15925581	97087192	14396996	197073424	58736384	326280928	31123454	46546540	4408541
451464	PSB2_MOUSE	Psmb2	PSB2_MOUSE		sp|Q9R1P3|PSB2_MOUSE Proteasome subunit beta type-2 OS=Mus musculus OX=10090 GN=Psmb2 PE=1 SV=1	63.278	true	2	1	0	10.45	22906	12	2	2	2	2	2	2	1		1			1	1		1	1	0	0	0	0	0	0	0	1	0		145713			345909	77862.6		1645169	50637.3	12446.4	90427.6
450788	EZRI_MOUSE	Ezr	EZRI_MOUSE		sp|P26040|EZRI_MOUSE Ezrin OS=Mus musculus OX=10090 GN=Ezr PE=1 SV=3	243.375	true	2	1	0	11.43	69407	37	7	4	7	4	13	7	4	1	4	4	1	4	3	1	4	2	0	0	0	0	3	1	0	3	0	464608	1.76756e+06	4.67196e+06	1.00784e+06	7.57914e+06	3.29054e+06	3200.9	30222048	2700777	38828.9	576254
451012	PLST_MOUSE	Pls3	PLST_MOUSE	PLSI_MOUSE	sp|Q99K51|PLST_MOUSE Plastin-3 OS=Mus musculus OX=10090 GN=Pls3 PE=1 SV=3	281.901	true	2	1	1	15.24	70742	40	9	5	9	5	12	7	5	2	2	1	1	2			4	1	1	0	0	0	1	0	0	5	0	636941	2.9128e+06	2.42342e+06	67574.8	6435721	1.23884e+06		32450614	1.52771e+06	154087	36467.4
451689	SYLC_MOUSE	Lars1	SYLC_MOUSE		sp|Q8BMJ2|SYLC_MOUSE Leucine--tRNA ligase, cytoplasmic OS=Mus musculus OX=10090 GN=Lars1 PE=1 SV=2	56.76	true	2	1	0	0.85	134192	68	1	1	1	1	1	1	1		1			1			1	1	0	0	0	0	0	0	0	1	0		276667			235411			2.15674e+06	71893.7	12446.4	171696
450946	H2B1B_MOUSE	H2bc3	H2B1B_MOUSE; H2B1C_MOUSE; H2B1F_MOUSE; H2B1H_MOUSE; H2B1K_MOUSE; H2B1M_MOUSE; H2B1P_MOUSE; H2B2B_MOUSE	H2B1A_MOUSE	sp|Q64475|H2B1B_MOUSE Histone H2B type 1-B OS=Mus musculus OX=10090 GN=H2bc3 PE=1 SV=3	425.92	true	2	8	1	56.35	13952	11	9	4	11	4	123	20	4	4	2	2	3	3	2	1	4	2	0	1	0	7	3	0	3	5	1	17234764	130895736	100711808	80665008	1055883776	56726260	197429232	3133500672	10755171	25622458	773653
450944	ESRP1_MOUSE	Esrp1	ESRP1_MOUSE		sp|Q3US41|ESRP1_MOUSE Epithelial splicing regulatory protein 1 OS=Mus musculus OX=10090 GN=Esrp1 PE=1 SV=2	35.019	true	2	1	0	2.21	75548	42	1	1	1	1	1	1	1								1		0	0	0	0	0	0	0	1	0								847333		12446.4	12408.4
451138	HS105_MOUSE	Hsph1	HS105_MOUSE		sp|Q61699|HS105_MOUSE Heat shock protein 105 kDa OS=Mus musculus OX=10090 GN=Hsph1 PE=1 SV=2	30.804	true	2	1	0	1.63	96407	55	1	1	1	1	1	1	1								1		0	0	0	0	0	0	0	1	0								841569		12446.4	12408.4
450899	PRS27_MOUSE	Prss27	PRS27_MOUSE		sp|Q8BJR6|PRS27_MOUSE Serine protease 27 OS=Mus musculus OX=10090 GN=Prss27 PE=2 SV=1	29.262	true	2	1	0	3.05	35789	16	1	1	1	1	1	1	1								1		0	0	0	0	0	0	0	1	0								838524		12446.4	12408.4
451396	TMX3_MOUSE	Tmx3	TMX3_MOUSE		sp|Q8BXZ1|TMX3_MOUSE Protein disulfide-isomerase TMX3 OS=Mus musculus OX=10090 GN=Tmx3 PE=1 SV=2	45.349	true	2	1	0	4.61	51848	26	2	2	2	2	2	2	2					1			2		0	0	0	0	1	0	0	1	0					296906			418018		12446.4	12408.4
450647	HNRH2_MOUSE	Hnrnph2	HNRH2_MOUSE		sp|P70333|HNRH2_MOUSE Heterogeneous nuclear ribonucleoprotein H2 OS=Mus musculus OX=10090 GN=Hnrnph2 PE=1 SV=1	114.89	true	2	1	0	11.14	49280	26	3	1	3	1	6	1	1	1	1	1		1			1	1	0	0	0	0	0	0	0	1	0	1.00643e+06	1.77086e+06	1.14502e+06	390455	2.47373e+06	1.07055e+06		7230400	130065	38450.8	29256
452073	IPO7_MOUSE	Ipo7	IPO7_MOUSE		sp|Q9EPL8|IPO7_MOUSE Importin-7 OS=Mus musculus OX=10090 GN=Ipo7 PE=1 SV=2	22.768	true	2	1	0	0.87	119486	47	1	1	1	1	1	1	1					1	1		1		0	0	0	0	0	0	0	1	0					68593.5	80849		811937		12446.4	12408.4
451756	AFAD_MOUSE	Afdn	AFAD_MOUSE		sp|Q9QZQ1|AFAD_MOUSE Afadin OS=Mus musculus OX=10090 GN=Afdn PE=1 SV=3	31.569	true	2	1	0	0.71	206496	110	1	1	1	1	1	1	1								1		0	0	0	0	0	0	0	1	0								802620		12446.4	12408.4
451707	RTRAF_MOUSE	RTRAF	RTRAF_MOUSE		sp|Q9CQE8|RTRAF_MOUSE RNA transcription, translation and transport factor protein OS=Mus musculus OX=10090 GN=RTRAF PE=1 SV=1	14.869	true	2	1	0	3.69	28152	18	1	1	1	1	1	1	1		1			1	1		1	1	0	0	0	0	1	0	0	0	0		82578.5			231049	109170		733114	59469.9	12446.4	51247.3
450698	PTBP3_MOUSE	Ptbp3	PTBP3_MOUSE	PTPRB_MOUSE	sp|Q8BHD7|PTBP3_MOUSE Polypyrimidine tract-binding protein 3 OS=Mus musculus OX=10090 GN=Ptbp3 PE=1 SV=1	120.503	true	2	1	1	6.5	56701	19	4	1	4	1	7	1	1			1			1			1	0	0	0	0	0	0	0	0	1	18429.8	3.03842e+06	3208864	39809.7	12422995	3.46562e+06		12177506	2671600	12446.4	12408.4
450722	CELF2_MOUSE	Celf2	CELF2_MOUSE		sp|Q9Z0H4|CELF2_MOUSE CUGBP Elav-like family member 2 OS=Mus musculus OX=10090 GN=Celf2 PE=1 SV=1	24.686	true	2	1	0	1.57	54271	21	1	1	1	1	1	1	1	1		1			1			1	0	0	1	0	0	0	0	0	0	17667.5		182188			158928			525617	17667.5	12408.4
450989	RSMB_MOUSE	Snrpb	RSMB_MOUSE; RSMN_MOUSE		sp|P27048|RSMB_MOUSE Small nuclear ribonucleoprotein-associated protein B OS=Mus musculus OX=10090 GN=Snrpb PE=1 SV=1	44.694	true	2	2	0	6.49	23656	16	2	2	2	2	6	6	2	1		1	1	1	1		1	2	1	0	1	1	0	0	0	1	2	1.25618e+06		1.01546e+06	258141	1.2237e+06	264189		1.40607e+06	2.83742e+06	61633	12408.4
451288	CAB39_MOUSE	Cab39	CAB39_MOUSE		sp|Q06138|CAB39_MOUSE Calcium-binding protein 39 OS=Mus musculus OX=10090 GN=Cab39 PE=1 SV=2	43.566	true	2	1	0	4.69	39843	25	2	2	2	2	2	2	2	1		2		2		1	2		0	0	0	0	0	0	0	2	0	349810		131937		277773		53821	1.11604e+06		44956.3	12408.4
450586	RASH_MOUSE	Hras	RASH_MOUSE; RASK_MOUSE; RASN_MOUSE		sp|Q61411|RASH_MOUSE GTPase HRas OS=Mus musculus OX=10090 GN=Hras PE=1 SV=2	33.584	true	2	3	0	5.82	21298	11	1	1	1	1	1	1	1			1		1	1		1	1	0	0	0	0	0	0	0	1	0			215731		462564	292969		1.76153e+06	43097.9	12446.4	12408.4
450759	USO1_MOUSE	Uso1	USO1_MOUSE		sp|Q9Z1Z0|USO1_MOUSE General vesicular transport factor p115 OS=Mus musculus OX=10090 GN=Uso1 PE=1 SV=2	63.17	true	2	1	0	1.98	106983	51	2	2	2	2	3	3	2	2	1	1	1	1	1		2	1	0	0	0	0	1	0	0	2	0	225890	183113	79444.2	237183	461242	123444		3.62442e+06	37101.5	86813.5	25864.1
450843	GORS2_MOUSE	Gorasp2	GORS2_MOUSE		sp|Q99JX3|GORS2_MOUSE Golgi reassembly-stacking protein 2 OS=Mus musculus OX=10090 GN=Gorasp2 PE=1 SV=3	22.494	true	2	1	0	1.77	47038	16	1	1	1	1	1	1	1				1	1			1	1	0	0	0	0	1	0	0	0	0				5627.31	531202			110051	93312.6	12446.4	12408.4
451340	ADAS_MOUSE	Agps	ADAS_MOUSE		sp|Q8C0I1|ADAS_MOUSE Alkyldihydroxyacetonephosphate synthase, peroxisomal OS=Mus musculus OX=10090 GN=Agps PE=1 SV=1	33.05	true	2	1	0	1.55	71684	40	1	1	1	1	1	1	1	1			1		1	1	1	1	0	0	0	0	0	0	0	1	0	31838			48648.1		139269	5176.15	222066	87225.9	31838	12408.4
451004	HS71L_MOUSE	Hspa1l	HS71L_MOUSE		sp|P16627|HS71L_MOUSE Heat shock 70 kDa protein 1-like OS=Mus musculus OX=10090 GN=Hspa1l PE=1 SV=4	287.93	true	2	1	0	13.88	70637	40	7	1	7	1	35	1	1					1			1		0	0	0	0	0	0	0	1	0	8964448	9319390	9415237	7037289	26375020	9661218	2811561	107357304	2728265	12446.4	12408.4
451985	BRK1_MOUSE	Brk1	BRK1_MOUSE		sp|Q91VR8|BRK1_MOUSE Protein BRICK1 OS=Mus musculus OX=10090 GN=Brk1 PE=1 SV=1	41.182	true	2	1	0	24	8761	7	2	2	2	2	3	3	2	1	1	1	1	1	1	1	2	1	0	0	0	0	0	0	0	3	0	134686	281058	243567	162032	210548	191096	15572.6	3.56255e+06	113043	58233.4	69960.1
451752	TMEDA_MOUSE	Tmed10	TMEDA_MOUSE		sp|Q9D1D4|TMEDA_MOUSE Transmembrane emp24 domain-containing protein 10 OS=Mus musculus OX=10090 GN=Tmed10 PE=1 SV=1	50.885	true	2	1	0	7.31	24911	11	2	2	2	2	3	3	2		1	2		2	2		2	1	0	1	0	0	0	0	0	2	0		746933	927848		2.31926e+06	658426		4875539	413003	12446.4	35824.7
452063	SLK_MOUSE	Slk	SLK_MOUSE		sp|O54988|SLK_MOUSE STE20-like serine/threonine-protein kinase OS=Mus musculus OX=10090 GN=Slk PE=1 SV=2	108.625	true	2	1	0	2.43	141457	71	3	3	3	3	3	3	3			3		3	2		2	2	0	0	0	0	1	0	0	2	0			498585		2446479	481717		1.65836e+06	209168	12446.4	12408.4
450573	EVPL_MOUSE	Evpl	EVPL_MOUSE		sp|Q9D952|EVPL_MOUSE Envoplakin OS=Mus musculus OX=10090 GN=Evpl PE=1 SV=3	182.903	true	2	1	0	3.05	232009	129	6	6	6	6	8	8	6	3	4	5	1	2	5	1	6	4	2	1	0	0	0	0	0	5	0	661242	571039	251753	238798	182475	299286	11535.3	32497564	1.38747e+06	520233	356574
452015	ANX11_MOUSE	Anxa11	ANX11_MOUSE		sp|P97384|ANX11_MOUSE Annexin A11 OS=Mus musculus OX=10090 GN=Anxa11 PE=1 SV=2	55.208	true	2	1	0	3.38	54079	22	2	2	2	2	6	6	2	1	1	2		2	2		2	1	0	1	1	0	0	0	0	3	1	371037	555101	497586		1.57627e+06	620309		3.69699e+06	777895	41545.1	31163.3
450925	UN45A_MOUSE	Unc45a	UN45A_MOUSE		sp|Q99KD5|UN45A_MOUSE Protein unc-45 homolog A OS=Mus musculus OX=10090 GN=Unc45a PE=1 SV=2	52.522	true	2	1	0	1.06	103446	65	1	1	1	1	1	1	1			1					1		0	0	0	0	0	0	0	1	0			38873					945650		12446.4	12408.4
450671	ZN318_MOUSE	Znf318	ZN318_MOUSE		sp|Q99PP2|ZN318_MOUSE Zinc finger protein 318 OS=Mus musculus OX=10090 GN=Znf318 PE=1 SV=3	20.891	true	2	1	0	0.31	246320	133	1	1	1	1	1	1	1				1		1	1	1	1	0	0	0	0	0	0	1	0	0				473093		11615.4	83538.2	50739.4	8477.94	12446.4	12408.4
451620	TM205_MOUSE	Tmem205	TM205_MOUSE		sp|Q91XE8|TM205_MOUSE Transmembrane protein 205 OS=Mus musculus OX=10090 GN=Tmem205 PE=1 SV=1	22.166	true	2	1	0	4.76	21180	8	1	1	1	1	1	1	1		1	1		1	1	1	1	1	0	0	0	0	0	0	0	1	0		95740.8	181054		122994	57110.1	7822.92	1.10547e+06	122216	12446.4	59415.6
451284	RAB38_MOUSE	Rab38	RAB38_MOUSE		sp|Q8QZZ8|RAB38_MOUSE Ras-related protein Rab-38 OS=Mus musculus OX=10090 GN=Rab38 PE=1 SV=1	61.712	true	2	1	0	9.48	23776	19	2	1	2	1	2	1	1								1		0	0	0	0	0	0	0	1	0	68942.4	75952.4	549245		509570	497923		1.11925e+06		12446.4	12408.4
451724	USP9X_MOUSE	Usp9x	USP9X_MOUSE		sp|P70398|USP9X_MOUSE Probable ubiquitin carboxyl-terminal hydrolase FAF-X OS=Mus musculus OX=10090 GN=Usp9x PE=1 SV=2	28.503	true	2	1	0	0.43	290711	140	1	1	1	1	1	1	1			1		1	1		1	1	0	0	0	0	0	0	0	1	0			164942		345024	140677		502442	101421	12446.4	12408.4
452036	SF3A1_MOUSE	Sf3a1	SF3A1_MOUSE		sp|Q8K4Z5|SF3A1_MOUSE Splicing factor 3A subunit 1 OS=Mus musculus OX=10090 GN=Sf3a1 PE=1 SV=1	48.29	true	2	1	0	1.9	88545	46	2	2	2	2	2	2	2	2	1	2	2	1	2		2	2	1	0	0	1	0	0	0	0	0	297211	57439.2	459862	617389	563748	599384		1.48044e+06	456508	195813	7456.03
451775	B2L13_MOUSE	Bcl2l13	B2L13_MOUSE		sp|P59017|B2L13_MOUSE Bcl-2-like protein 13 OS=Mus musculus OX=10090 GN=Bcl2l13 PE=1 SV=2	21.838	true	2	1	0	2.53	46718	18	1	1	1	1	1	1	1	1			1	1		1	1	1	0	0	0	0	1	0	0	0	0	101608			70166	262496		11278.1	518843	48208.4	101608	12408.4
451168	EEA1_MOUSE	Eea1	EEA1_MOUSE		sp|Q8BL66|EEA1_MOUSE Early endosome antigen 1 OS=Mus musculus OX=10090 GN=Eea1 PE=1 SV=2	34.784	true	2	1	0	0.99	160915	112	1	1	1	1	1	1	1								1		0	0	0	0	0	0	0	1	0								677375		12446.4	12408.4
450612	EHD3_MOUSE	Ehd3	EHD3_MOUSE	EHD1_MOUSE	sp|Q9QXY6|EHD3_MOUSE EH domain-containing protein 3 OS=Mus musculus OX=10090 GN=Ehd3 PE=1 SV=2	54.307	true	2	1	1	3.55	60821	32	2	1	2	1	4	1	1								1		0	0	0	0	0	0	0	1	0	110755	254185	320874	172869	878468	72382.3		1.85134e+06	22569.5	12446.4	12408.4
451674	MP2K2_MOUSE	Map2k2	MP2K2_MOUSE		sp|Q63932|MP2K2_MOUSE Dual specificity mitogen-activated protein kinase kinase 2 OS=Mus musculus OX=10090 GN=Map2k2 PE=1 SV=2	91.192	true	2	1	0	8.48	44402	23	3	1	3	1	3	1	1					1			1		0	0	0	0	0	0	0	1	0		617702	413194		1.2254e+06	280184		2.2727e+06	18257.8	12446.4	12408.4
452080	THTR_MOUSE	Tst	THTR_MOUSE		sp|P52196|THTR_MOUSE Thiosulfate sulfurtransferase OS=Mus musculus OX=10090 GN=Tst PE=1 SV=3	37.427	true	2	1	0	3.37	33465	21	1	1	1	1	1	1	1	1				1			1		0	0	0	0	0	0	0	1	0	21327.7				55183.6			1.12729e+06		21327.7	12408.4
451328	CTND1_MOUSE	Ctnnd1	CTND1_MOUSE		sp|P30999|CTND1_MOUSE Catenin delta-1 OS=Mus musculus OX=10090 GN=Ctnnd1 PE=1 SV=2	162.35	true	2	1	0	5.97	104925	55	5	5	5	5	6	6	5	1	2	3		2	1		5		0	0	0	0	0	0	0	6	0	176673	144857	143152		436371	15106.8		5175395		13506.1	36290.5
451721	HSPB1_MOUSE	Hspb1	HSPB1_MOUSE		sp|P14602|HSPB1_MOUSE Heat shock protein beta-1 OS=Mus musculus OX=10090 GN=Hspb1 PE=1 SV=3	109.928	true	2	1	0	9.09	23013	14	2	2	2	2	10	10	2	1	1	1	1	2	1	1	2	1	0	1	1	0	1	0	0	5	2	5601120	1.31951e+06	789231	2.52863e+06	2.16322e+06	1.43308e+06	2341.35	65699404	474391	1215423	245699
450752	ALD1_MOUSE	Akr1b7	ALD1_MOUSE		sp|P21300|ALD1_MOUSE Aldo-keto reductase family 1 member B7 OS=Mus musculus OX=10090 GN=Akr1b7 PE=1 SV=4	101.926	true	2	1	0	8.54	35988	21	3	1	3	1	5	2	1	1				1			1		0	0	0	0	0	0	0	2	0	94759.4		207146		789328			18231776		94759.4	12408.4
450542	K2C7_MOUSE	Krt7	K2C7_MOUSE		sp|Q9DCV7|K2C7_MOUSE Keratin, type II cytoskeletal 7 OS=Mus musculus OX=10090 GN=Krt7 PE=1 SV=1	306.128	true	2	1	0	14.22	50709	35	8	1	8	1	32	1	1			1	1	1			1	1	0	0	0	0	0	0	0	1	0	366448576	24485572	3.40638e+06	9484786	17200760	8010897	84169592	19201362	2.35947e+06	12446.4	12408.4
451822	CNPY3_MOUSE	Cnpy3	CNPY3_MOUSE		sp|Q9DAU1|CNPY3_MOUSE Protein canopy homolog 3 OS=Mus musculus OX=10090 GN=Cnpy3 PE=1 SV=1	26.413	true	2	1	0	2.9	30538	17	1	1	1	1	1	1	1	1		1	1	1			1		0	0	0	0	1	0	0	0	0	3043.04		9407.99	3354.56	466476			48880.2		3043.04	12408.4
450830	DCTN1_MOUSE	Dctn1	DCTN1_MOUSE		sp|O08788|DCTN1_MOUSE Dynactin subunit 1 OS=Mus musculus OX=10090 GN=Dctn1 PE=1 SV=3	79.085	true	2	1	0	1.8	141676	75	2	2	2	2	2	2	2	1	1	1		2	1		2		0	0	0	0	0	0	0	2	0	45378.8	126947	62995.7		354667	81874.7		1.43563e+06		20305.6	26023.2
452078	STAU1_MOUSE	Stau1	STAU1_MOUSE		sp|Q9Z108|STAU1_MOUSE Double-stranded RNA-binding protein Staufen homolog 1 OS=Mus musculus OX=10090 GN=Stau1 PE=1 SV=1	45.839	true	2	1	0	2.05	53925	33	1	1	1	1	1	1	1			1		1	1		1	1	0	0	0	0	1	0	0	0	0			35353.4		882124	357329		155003	63060.9	12446.4	12408.4
451522	SYTC_MOUSE	Tars1	SYTC_MOUSE		sp|Q9D0R2|SYTC_MOUSE Threonine--tRNA ligase 1, cytoplasmic OS=Mus musculus OX=10090 GN=Tars1 PE=1 SV=2	66.633	true	2	1	0	3.05	83356	48	2	2	2	2	2	2	2					2			2		0	0	0	0	0	0	0	2	0					158000			607307		12446.4	12408.4
451314	NDUA3_MOUSE	Ndufa3	NDUA3_MOUSE		sp|Q9CQ91|NDUA3_MOUSE NADH dehydrogenase [ubiquinone] 1 alpha subcomplex subunit 3 OS=Mus musculus OX=10090 GN=Ndufa3 PE=1 SV=1	21.941	true	2	1	0	13.1	9330	5	1	1	1	1	1	1	1								1		0	0	0	0	0	0	0	1	0								607238		12446.4	12408.4
451015	MEP50_MOUSE	Wdr77	MEP50_MOUSE		sp|Q99J09|MEP50_MOUSE Methylosome protein 50 OS=Mus musculus OX=10090 GN=Wdr77 PE=1 SV=1	17.841	true	2	1	0	2.05	36943	13	1	1	1	1	1	1	1			1		1	1		1	1	0	0	0	0	0	0	0	1	0			179657		150737	62227.8		692900	70061.7	12446.4	12408.4
451833	UBE3A_MOUSE	Ube3a	UBE3A_MOUSE		sp|O08759|UBE3A_MOUSE Ubiquitin-protein ligase E3A OS=Mus musculus OX=10090 GN=Ube3a PE=1 SV=2	37.705	true	2	1	0	2.41	99818	46	2	2	2	2	2	2	2		1	2	1	2	1		2	1	0	0	0	0	1	0	0	1	0		65537.2	151017	38986.3	338566	56034.4		632546	34909	12446.4	11022.9
452129	AK1D1_MOUSE	Akr1d1	AK1D1_MOUSE		sp|Q8VCX1|AK1D1_MOUSE Aldo-keto reductase family 1 member D1 OS=Mus musculus OX=10090 GN=Akr1d1 PE=1 SV=1	25.518	true	2	1	0	2.77	37289	20	1	1	1	1	1	1	1	1				1	1		1	1	0	0	0	0	0	0	0	1	0	1.93184e+06				388388	64455.7		69950248	17380.7	1.93184e+06	12408.4
450849	ELMO1_MOUSE	Elmo1	ELMO1_MOUSE		sp|Q8BPU7|ELMO1_MOUSE Engulfment and cell motility protein 1 OS=Mus musculus OX=10090 GN=Elmo1 PE=1 SV=2	10.364	true	2	1	0	0.96	83936	45	1	1	1	1	1	1	1			1	1		1		1	1	0	0	0	0	0	0	0	1	0			202904	94825.9		120161		346153	156247	12446.4	12408.4
450782	ORML2_MOUSE	Ormdl2	ORML2_MOUSE; ORML3_MOUSE		sp|Q9CQZ0|ORML2_MOUSE ORM1-like protein 2 OS=Mus musculus OX=10090 GN=Ormdl2 PE=1 SV=1	25.803	true	2	2	0	7.19	17390	7	1	1	1	1	1	1	1		1			1		1	1	1	0	0	0	0	0	0	0	1	0		546942			460558		8802.39	1.31227e+06	70966.7	12446.4	339426
452010	PSIP1_MOUSE	Psip1	PSIP1_MOUSE		sp|Q99JF8|PSIP1_MOUSE PC4 and SFRS1-interacting protein OS=Mus musculus OX=10090 GN=Psip1 PE=1 SV=1	56.547	true	2	1	0	3.22	59697	34	2	2	2	2	2	2	2	1	1	2	2	2	2	1	2	1	0	0	0	1	0	1	0	0	0	318876	137448	311459	318876	1.02036e+06	904348	8829.94	553079	200161	28758	9799.06
450738	SCOT1_MOUSE	Oxct1	SCOT1_MOUSE		sp|Q9D0K2|SCOT1_MOUSE Succinyl-CoA:3-ketoacid coenzyme A transferase 1, mitochondrial OS=Mus musculus OX=10090 GN=Oxct1 PE=1 SV=1	66.482	true	2	1	0	3.08	55989	25	2	2	2	2	4	4	2	1	2	2		2	2	1	2	2	1	0	0	0	1	0	0	2	0	182985	339405	325282		498784	208355	7065.25	1.36174e+06	105112	14870.3	139403
450806	RAB5B_MOUSE	Rab5b	RAB5B_MOUSE		sp|P61021|RAB5B_MOUSE Ras-related protein Rab-5B OS=Mus musculus OX=10090 GN=Rab5b PE=1 SV=1	195.134	true	2	1	0	26.05	23706	14	4	3	4	3	6	5	3	1	2	1		3			3	1	0	0	0	0	1	0	0	4	0	371060	212456	392254		1.57884e+06	273131		5753774	162981	11915.4	133930
451256	OLA1_MOUSE	Ola1	OLA1_MOUSE		sp|Q9CZ30|OLA1_MOUSE Obg-like ATPase 1 OS=Mus musculus OX=10090 GN=Ola1 PE=1 SV=1	104.062	true	2	1	0	10.35	44730	28	3	3	3	3	3	3	3		2	3	1	3	1	1	3	1	0	0	0	0	0	0	0	3	0		378901	260915	50670.1	972758	441405	4768.15	2516562	133244	12446.4	180067
451372	EMC7_MOUSE	Emc7	EMC7_MOUSE		sp|Q9EP72|EMC7_MOUSE ER membrane protein complex subunit 7 OS=Mus musculus OX=10090 GN=Emc7 PE=1 SV=1	50.594	true	2	1	0	9.54	26310	13	2	2	2	2	2	2	2		2	1		2			2	1	0	0	0	0	0	0	0	2	0		5.6838e+06	56313.7		322141			1.07631e+06	27581.9	12446.4	527517
451836	SYQ_MOUSE	Qars1	SYQ_MOUSE		sp|Q8BML9|SYQ_MOUSE Glutamine--tRNA ligase OS=Mus musculus OX=10090 GN=Qars1 PE=1 SV=1	21.735	true	2	1	0	1.42	87677	51	1	1	1	1	1	1	1			1		1			1		0	0	0	0	0	0	0	1	0			27024.9		75306.5			537772		12446.4	12408.4
452023	PPP6_MOUSE	Ppp6c	PPP6_MOUSE		sp|Q9CQR6|PPP6_MOUSE Serine/threonine-protein phosphatase 6 catalytic subunit OS=Mus musculus OX=10090 GN=Ppp6c PE=1 SV=1	13.186	true	2	1	0	2.3	35159	20	1	1	1	1	1	1	1			1	1	1	1	1	1	1	0	0	0	0	1	0	0	0	0			234499	59791.9	350246	245024	2856.99	886400	91387.8	12446.4	12408.4
451210	SSRA_MOUSE	Ssr1	SSRA_MOUSE		sp|Q9CY50|SSRA_MOUSE Translocon-associated protein subunit alpha OS=Mus musculus OX=10090 GN=Ssr1 PE=1 SV=1	52.727	true	2	1	0	8.04	32065	11	2	2	2	2	5	5	2	1	1	2		2	1		2	1	1	1	0	0	2	0	0	1	0	1.34645e+06	1.33641e+06	1108665		2.60901e+06	925043		5.23348e+06	113369	108314	67735.9
450622	CPNE3_MOUSE	Cpne3	CPNE3_MOUSE	CPNE2_MOUSE; CPNE4_MOUSE; CPNE5_MOUSE; CPNE6_MOUSE; CPNE7_MOUSE; CPNE8_MOUSE; CPNE9_MOUSE	sp|Q8BT60|CPNE3_MOUSE Copine-3 OS=Mus musculus OX=10090 GN=Cpne3 PE=1 SV=2	112.344	true	2	1	7	8.07	59585	24	4	3	4	3	5	4	3		1	2	1	3	2	1	3		0	1	1	0	1	0	0	1	0	432694	1261917	942594	412273	2131454	637544	10371.9	3255931		12446.4	18071.9
450726	SCYL2_MOUSE	Scyl2	SCYL2_MOUSE		sp|Q8CFE4|SCYL2_MOUSE SCY1-like protein 2 OS=Mus musculus OX=10090 GN=Scyl2 PE=1 SV=1	16.239	true	2	1	0	0.75	103317	48	1	1	1	1	1	1	1			1		1	1		1	1	0	0	0	0	0	0	0	1	0			29369.7		85645.1	22002.8		347889	20952.9	12446.4	12408.4
450814	HMGA1_MOUSE	Hmga1	HMGA1_MOUSE		sp|P17095|HMGA1_MOUSE High mobility group protein HMG-I/HMG-Y OS=Mus musculus OX=10090 GN=Hmga1 PE=1 SV=4	22.306	true	2	1	0	8.41	11614	6	1	1	1	1	1	1	1	1	1	1	1		1	1	1		0	0	0	0	0	0	1	0	0	42719.6	48209.6	51933.7	15051.2		131617	190894	162729		42719.6	29918.3
450743	NDUV2_MOUSE	Ndufv2	NDUV2_MOUSE		sp|Q9D6J6|NDUV2_MOUSE NADH dehydrogenase [ubiquinone] flavoprotein 2, mitochondrial OS=Mus musculus OX=10090 GN=Ndufv2 PE=1 SV=2	23.407	true	2	1	0	4.03	27285	15	1	1	1	1	1	1	1			1		1			1		0	0	0	0	0	0	0	1	0			16872.3		68115.5			316662		12446.4	12408.4
450884	COX16_MOUSE	Cox16	COX16_MOUSE		sp|Q9CR63|COX16_MOUSE Cytochrome c oxidase assembly protein COX16 homolog, mitochondrial OS=Mus musculus OX=10090 GN=Cox16 PE=3 SV=1	30.252	true	2	1	0	6.6	12266	9	1	1	1	1	2	2	1	1	1		1	1	1	1		1	0	1	0	1	0	0	0	0	0	29826.8	606872		313485	314023	175195	49415.8		231941	29826.8	376618
451733	SYYC_MOUSE	Yars1	SYYC_MOUSE		sp|Q91WQ3|SYYC_MOUSE Tyrosine--tRNA ligase, cytoplasmic OS=Mus musculus OX=10090 GN=Yars1 PE=1 SV=3	30.153	true	2	1	0	2.08	59105	45	1	1	1	1	1	1	1			1					1	1	0	0	0	0	0	0	0	1	0			52234					580032	22035.7	12446.4	12408.4
451857	VATH_MOUSE	Atp6v1h	VATH_MOUSE		sp|Q8BVE3|VATH_MOUSE V-type proton ATPase subunit H OS=Mus musculus OX=10090 GN=Atp6v1h PE=1 SV=1	92.403	true	2	1	0	4.14	55855	27	2	2	2	2	2	2	2	1	1	1		1	1		2		0	0	0	0	1	0	0	1	0	95141.4	166205	127048		427430	97407.3		1351576		27951	27821
451467	CISY_MOUSE	Cs	CISY_MOUSE		sp|Q9CZU6|CISY_MOUSE Citrate synthase, mitochondrial OS=Mus musculus OX=10090 GN=Cs PE=1 SV=1	78.362	true	2	1	0	4.74	51737	21	2	2	2	2	2	2	2			2		1	1		2		0	0	0	0	0	0	0	2	0			251832		170827	72935.7		3.0269e+06		12446.4	12408.4
451863	GBA2_MOUSE	Gba2	GBA2_MOUSE		sp|Q69ZF3|GBA2_MOUSE Non-lysosomal glucosylceramidase OS=Mus musculus OX=10090 GN=Gba2 PE=1 SV=2	31.344	true	2	1	0	1.09	103292	41	1	1	1	1	1	1	1								1		0	0	0	0	0	0	0	1	0								533116		12446.4	12408.4
451060	NLRX1_MOUSE	Nlrx1	NLRX1_MOUSE		sp|Q3TL44|NLRX1_MOUSE NLR family member X1 OS=Mus musculus OX=10090 GN=Nlrx1 PE=1 SV=1	51.343	true	2	1	0	1.74	107831	51	2	2	2	2	2	2	2		1	2	1	2	1	1	2	1	0	0	0	0	0	0	0	2	0		100632	109601	44338.3	216858	44086.8	5363.45	1.50288e+06	31206.5	12446.4	26256.5
451916	PGM2_MOUSE	Pgm2	PGM2_MOUSE		sp|Q7TSV4|PGM2_MOUSE Phosphoglucomutase-2 OS=Mus musculus OX=10090 GN=Pgm2 PE=1 SV=1	62.637	true	2	1	0	4.03	68748	36	2	2	2	2	3	3	2	1	2	1	1	2	1		2	1	0	1	0	0	1	0	0	1	0	92879.6	1545318	185845	319902	1440432	145998		5186077	66699.1	16832.8	524767
451913	GPAT3_MOUSE	Gpat3	GPAT3_MOUSE		sp|Q8C0N2|GPAT3_MOUSE Glycerol-3-phosphate acyltransferase 3 OS=Mus musculus OX=10090 GN=Gpat3 PE=1 SV=1	44.703	true	2	1	0	2.74	48999	24	1	1	1	1	1	1	1								1		0	0	0	0	0	0	0	1	0								524146		12446.4	12408.4
451573	SON_MOUSE	Son	SON_MOUSE		sp|Q9QX47|SON_MOUSE Protein SON OS=Mus musculus OX=10090 GN=Son PE=1 SV=2	43.096	true	2	1	0	0.74	265651	86	2	2	2	2	2	2	2	1	1	2		2	2		2	2	0	0	1	0	0	0	0	1	0	116006	171540	429607		465750	367673		408279	52532.3	18597.8	13299.3
450784	U520_MOUSE	Snrnp200	U520_MOUSE		sp|Q6P4T2|U520_MOUSE U5 small nuclear ribonucleoprotein 200 kDa helicase OS=Mus musculus OX=10090 GN=Snrnp200 PE=1 SV=1	276.896	true	2	1	0	5.06	244547	129	10	10	10	10	12	12	10	3	5	8	5	10	9	1	10	6	0	0	0	2	3	4	0	3	0	363202	1.07588e+06	1.01578e+06	862700	4852098	3584426	248554	4.97571e+06	898981	34707.2	545308
450753	ALD2_MOUSE	Akr1b8	ALD2_MOUSE		sp|P45377|ALD2_MOUSE Aldose reductase-related protein 2 OS=Mus musculus OX=10090 GN=Akr1b8 PE=1 SV=2	135.192	true	2	1	0	12.03	36121	20	4	2	4	2	6	3	2	2				1			2		0	0	0	0	0	0	0	3	0	249589		207146		789328			20269660		176627	12408.4
450805	RAB5C_MOUSE	Rab5c	RAB5C_MOUSE		sp|P35278|RAB5C_MOUSE Ras-related protein Rab-5C OS=Mus musculus OX=10090 GN=Rab5c PE=1 SV=2	120.319	true	2	1	0	20.37	23413	14	3	2	3	2	3	2	2			2		1			2		0	0	0	0	0	0	0	2	0	324867		637053		1.10326e+06	273131		5066506		12446.4	12408.4
450523	NUDT5_MOUSE	Nudt5	NUDT5_MOUSE		sp|Q9JKX6|NUDT5_MOUSE ADP-sugar pyrophosphatase OS=Mus musculus OX=10090 GN=Nudt5 PE=1 SV=1	51.938	true	2	1	0	11.01	23984	13	2	2	2	2	3	3	2	1	2	1		2	2		2	1	0	1	0	0	0	1	0	1	0	93305.7	485097	181102		600547	312016		1.20271e+06	52551.2	12436.2	264580
451602	TM214_MOUSE	Tmem214	TM214_MOUSE		sp|Q8BM55|TM214_MOUSE Transmembrane protein 214 OS=Mus musculus OX=10090 GN=Tmem214 PE=1 SV=1	26.283	true	2	1	0	1.31	76430	38	1	1	1	1	1	1	1	1		1	1	1		1	1	1	0	0	0	0	0	0	0	1	0	445250		61462	199649	84996.2		56863.2	382288	89662.5	445250	12408.4
450589	LIS1_MOUSE	Pafah1b1	LIS1_MOUSE		sp|P63005|LIS1_MOUSE Platelet-activating factor acetylhydrolase IB subunit alpha OS=Mus musculus OX=10090 GN=Pafah1b1 PE=1 SV=2	116.841	true	2	1	0	8.54	46670	26	3	3	3	3	3	3	3	3	2	2	2	3	3	2	3	3	0	0	0	0	0	0	0	3	0	1.43986e+06	193956	878060	388198	3.12485e+06	13237477	190885	6058722	201779	1.85627e+06	319780
451835	RB27B_MOUSE	Rab27b	RB27B_MOUSE		sp|Q99P58|RB27B_MOUSE Ras-related protein Rab-27B OS=Mus musculus OX=10090 GN=Rab27b PE=1 SV=3	23.668	true	2	1	0	3.21	24559	13	1	1	1	1	1	1	1			1					1	1	0	0	0	0	0	0	0	1	0			25654.3					440338	13166.5	12446.4	12408.4
450795	CUL4A_MOUSE	Cul4a	CUL4A_MOUSE; CUL4B_MOUSE		sp|Q3TCH7|CUL4A_MOUSE Cullin-4A OS=Mus musculus OX=10090 GN=Cul4a PE=1 SV=1	36.866	true	2	2	0	1.05	87753	58	1	1	1	1	1	1	1		1	1			1		1	1	0	0	0	0	0	0	0	1	0		90136.8	93735.1			72653.1		545901	170067	12446.4	55937.9
451092	CTBP2_MOUSE	Ctbp2	CTBP2_MOUSE		sp|P56546|CTBP2_MOUSE C-terminal-binding protein 2 OS=Mus musculus OX=10090 GN=Ctbp2 PE=1 SV=2	21.539	true	2	1	0	1.8	48957	24	1	1	1	1	1	1	1			1	1	1	1				0	0	0	0	1	0	0	0	0			10647	3420.35	423871	9227.49				12446.4	12408.4
451963	MY18A_MOUSE	Myo18a	MY18A_MOUSE		sp|Q9JMH9|MY18A_MOUSE Unconventional myosin-XVIIIa OS=Mus musculus OX=10090 GN=Myo18a PE=1 SV=2	55.776	true	2	1	0	0.88	232755	139	2	2	2	2	3	3	2	1	2	2	1	2	2		2	2	0	0	0	0	0	1	0	1	1	155151	337309	197230	168726	517210	523079		1.25977e+06	241397	21481.4	113028
450825	SUMO2_MOUSE	Sumo2	SUMO2_MOUSE	SUMO3_MOUSE	sp|P61957|SUMO2_MOUSE Small ubiquitin-related modifier 2 OS=Mus musculus OX=10090 GN=Sumo2 PE=1 SV=1	90.569	true	2	1	1	23.16	10871	4	2	2	2	2	6	6	2		1	2		1	2		2	2	0	1	1	0	0	2	0	2	0		1.82005e+06	2.48905e+06		3.89795e+06	1.95735e+06		6.5971e+06	548312	12446.4	98409.8
450766	FSCN1_MOUSE	Fscn1	FSCN1_MOUSE		sp|Q61553|FSCN1_MOUSE Fascin OS=Mus musculus OX=10090 GN=Fscn1 PE=1 SV=4	32.292	true	2	1	0	2.03	54508	30	1	1	1	1	1	1	1		1						1		0	0	0	0	0	0	0	1	0		53050.8						1.27052e+06		12446.4	32922.7
451778	RRP5_MOUSE	Pdcd11	RRP5_MOUSE		sp|Q6NS46|RRP5_MOUSE Protein RRP5 homolog OS=Mus musculus OX=10090 GN=Pdcd11 PE=1 SV=2	82.685	true	2	1	0	1.66	207776	115	2	2	2	2	3	3	2	2		1	1	2	1	1	2		0	0	0	0	2	0	0	1	0	340455		100809	192685	1.88722e+06	454224	5164.68	1.57692e+06		105940	12408.4
450896	UBP47_MOUSE	Usp47	UBP47_MOUSE		sp|Q8BY87|UBP47_MOUSE Ubiquitin carboxyl-terminal hydrolase 47 OS=Mus musculus OX=10090 GN=Usp47 PE=1 SV=2	22.925	true	2	1	0	0.65	157453	79	1	1	1	1	1	1	1			1	1		1		1	1	0	0	0	0	0	0	0	0	1			74251.9	40504.2		31476		224354	68576.6	12446.4	12408.4
450903	SRSF3_MOUSE	Srsf3	SRSF3_MOUSE		sp|P84104|SRSF3_MOUSE Serine/arginine-rich splicing factor 3 OS=Mus musculus OX=10090 GN=Srsf3 PE=1 SV=1	68.706	true	2	1	0	10.37	19329	9	2	2	2	2	7	7	2	2	2	2	2	1	2	1	1	2	0	0	2	1	1	2	0	0	1	400824	2588060	3121071	783740	4.96194e+06	2651789	73608.6	9745594	1.93676e+06	101112	631079
451745	ARMD3_MOUSE	Armh3	ARMD3_MOUSE		sp|Q6PD19|ARMD3_MOUSE Armadillo-like helical domain-containing protein 3 OS=Mus musculus OX=10090 GN=Armh3 PE=1 SV=2	27.284	true	2	1	0	1.31	78631	36	1	1	1	1	1	1	1					1			1		0	0	0	0	0	0	0	1	0					180340			450786		12446.4	12408.4
450761	PPIF_MOUSE	Ppif	PPIF_MOUSE		sp|Q99KR7|PPIF_MOUSE Peptidyl-prolyl cis-trans isomerase F, mitochondrial OS=Mus musculus OX=10090 GN=Ppif PE=1 SV=1	26.785	true	2	1	0	3.4	21736	18	1	1	1	1	1	1	1	1	1	1		1	1	1	1	1	0	0	0	0	0	0	0	1	0	4918.4	66943.2	99174.9		150615	60914.2	3725.83	485513	56160	4918.4	41544.2
450976	BICD2_MOUSE	Bicd2	BICD2_MOUSE	BICD1_MOUSE	sp|Q921C5|BICD2_MOUSE Protein bicaudal D homolog 2 OS=Mus musculus OX=10090 GN=Bicd2 PE=1 SV=1	154.22	true	2	1	1	5.73	93389	60	5	5	5	5	5	5	5	2	2	3	2	3	2	1	5	1	0	0	0	0	0	0	0	5	0	147542	335878	118718	71206.9	564942	69864.3	2779.19	3.1291e+06	7792.08	42730.4	38713.2
451851	CYH4_MOUSE	Cyth4	CYH4_MOUSE		sp|Q80YW0|CYH4_MOUSE Cytohesin-4 OS=Mus musculus OX=10090 GN=Cyth4 PE=1 SV=1	30.838	true	2	1	0	2.54	45285	28	1	1	1	1	1	1	1		1	1		1	1	1			0	0	0	0	1	0	0	0	0		68481.8	37947.8		103843	31384.1	42445.2			12446.4	42499
450915	B4GT5_MOUSE	B4galt5	B4GT5_MOUSE	B4GT6_MOUSE	sp|Q9JMK0|B4GT5_MOUSE Beta-1,4-galactosyltransferase 5 OS=Mus musculus OX=10090 GN=B4galt5 PE=1 SV=2	86.65	true	2	1	1	7.22	44814	19	3	3	3	3	4	4	3	1	2	1	2	3	3		3		0	0	0	1	0	1	0	2	0	129889	142072	18786.3	538880	2.02993e+06	918911		1.74872e+06		19070.6	89144.4
451101	SUCB1_MOUSE	Sucla2	SUCB1_MOUSE		sp|Q9Z2I9|SUCB1_MOUSE Succinate--CoA ligase [ADP-forming] subunit beta, mitochondrial OS=Mus musculus OX=10090 GN=Sucla2 PE=1 SV=2	43.774	true	2	1	0	2.16	50114	31	1	1	1	1	1	1	1			1		1	1		1	1	0	0	0	0	0	0	0	1	0			178500		410429	144744		249313	139728	12446.4	12408.4
450570	SPCS3_MOUSE	Spcs3	SPCS3_MOUSE		sp|Q6ZWQ7|SPCS3_MOUSE Signal peptidase complex subunit 3 OS=Mus musculus OX=10090 GN=Spcs3 PE=1 SV=1	67.731	true	2	1	0	11.67	20313	7	2	2	2	2	2	2	2	1	2	2	1	2	2		2	1	0	0	0	0	0	0	0	2	0	1591744	344168	801973	295934	1.99918e+06	651325		3913374	211165	11855.5	102095
451714	NOG1_MOUSE	Gtpbp4	NOG1_MOUSE		sp|Q99ME9|NOG1_MOUSE Nucleolar GTP-binding protein 1 OS=Mus musculus OX=10090 GN=Gtpbp4 PE=1 SV=3	99.231	true	2	1	0	4.57	74113	43	3	3	3	3	7	7	3	2	2	2	2	3	2	2	3	2	1	2	0	0	1	1	1	1	0	1267250	1.024e+06	1.24e+06	619448	3.88274e+06	1896195	1.02239e+06	3.57603e+06	754690	1.28347e+06	598919
452030	ACACA_MOUSE	Acaca	ACACA_MOUSE		sp|Q5SWU9|ACACA_MOUSE Acetyl-CoA carboxylase 1 OS=Mus musculus OX=10090 GN=Acaca PE=1 SV=1	24.828	true	2	1	0	0.6	265257	139	1	1	1	1	1	1	1			1		1			1		0	0	0	0	0	0	0	1	0			43766.9		144568			626652		12446.4	12408.4
451774	CAVN1_MOUSE	Cavin1	CAVN1_MOUSE		sp|O54724|CAVN1_MOUSE Caveolae-associated protein 1 OS=Mus musculus OX=10090 GN=Cavin1 PE=1 SV=1	21.368	true	2	1	0	4.59	43954	21	1	1	1	1	1	1	1								1		0	0	0	0	0	0	0	1	0								419121		12446.4	12408.4
451901	MILK1_MOUSE	Micall1	MILK1_MOUSE		sp|Q8BGT6|MILK1_MOUSE MICAL-like protein 1 OS=Mus musculus OX=10090 GN=Micall1 PE=1 SV=3	29.576	true	2	1	0	0.92	94078	46	1	1	1	1	1	1	1	1		1	1				1		0	0	0	0	0	0	0	1	0	53227.3		14039.9	15540.4				838978		53227.3	12408.4
451723	PGTB1_MOUSE	Pggt1b	PGTB1_MOUSE		sp|Q8BUY9|PGTB1_MOUSE Geranylgeranyl transferase type-1 subunit beta OS=Mus musculus OX=10090 GN=Pggt1b PE=1 SV=1	26.187	true	2	1	0	2.12	42353	21	1	1	1	1	1	1	1			1			1		1	1	0	0	0	0	0	0	0	1	0			25787.9			17549.1		187278	25259.8	12446.4	12408.4
452090	FILA2_MOUSE	Flg2	FILA2_MOUSE		sp|Q2VIS4|FILA2_MOUSE Filaggrin-2 OS=Mus musculus OX=10090 GN=Flg2 PE=1 SV=2	54.775	true	2	1	0	0.72	251372	121	1	1	2	2	2	2	2	1	1	2	1	1	1		2	1	1	0	0	0	0	0	0	1	0	1.16553e+06	103708	736685	391203	464653	377750		1.05164e+06	50259.9	104779	12805.2
452121	CYRIB_MOUSE	Cyrib	CYRIB_MOUSE		sp|Q921M7|CYRIB_MOUSE CYFIP-related Rac1 interactor B OS=Mus musculus OX=10090 GN=Cyrib PE=1 SV=1	96.141	true	2	1	0	9.88	36776	23	2	2	2	2	3	3	2		2	2		2	1	1	2	1	0	0	0	0	1	1	0	0	1		317160	1.14902e+06		412130	725116	6158.85	2.20188e+06	261155	12446.4	171904
450802	ELOB_MOUSE	Elob	ELOB_MOUSE		sp|P62869|ELOB_MOUSE Elongin-B OS=Mus musculus OX=10090 GN=Elob PE=1 SV=1	11.921	true	2	1	0	5.93	13170	11	1	1	1	1	1	1	1			1		1	1		1	1	0	0	0	0	0	0	0	1	0			97989.2		118205	70634.4		2.18538e+06	7994.61	12446.4	12408.4
451311	UBQL1_MOUSE	Ubqln1	UBQL1_MOUSE		sp|Q8R317|UBQL1_MOUSE Ubiquilin-1 OS=Mus musculus OX=10090 GN=Ubqln1 PE=1 SV=1	22.822	true	2	1	0	2.92	61976	14	1	1	1	1	1	1	1					1			1		0	0	0	0	0	0	0	1	0					65626.8			396546		12446.4	12408.4
451625	DHB5_MOUSE	Akr1c6	DHB5_MOUSE	AK1CL_MOUSE; AKC1H_MOUSE	sp|P70694|DHB5_MOUSE Estradiol 17 beta-dehydrogenase 5 OS=Mus musculus OX=10090 GN=Akr1c6 PE=1 SV=1	104.781	true	2	1	2	9.6	37047	24	3	3	3	3	6	6	3	2	1	1	1	2	2		3	2	1	0	0	1	0	0	0	4	0	3135420	237682	115116	722260	746749	178640		112840128	52328.2	3.63265e+06	75727.8
450731	ERF1_MOUSE	Etf1	ERF1_MOUSE		sp|Q8BWY3|ERF1_MOUSE Eukaryotic peptide chain release factor subunit 1 OS=Mus musculus OX=10090 GN=Etf1 PE=1 SV=4	62.725	true	2	1	0	4.12	49030	28	2	2	2	2	3	3	2	1	1	2		1	1		2		1	0	0	0	0	0	0	2	0	192225	236876	438302		862568	294313		4.4503e+06		23064.7	16615.5
451281	MYH14_MOUSE	Myh14	MYH14_MOUSE		sp|Q6URW6|MYH14_MOUSE Myosin-14 OS=Mus musculus OX=10090 GN=Myh14 PE=1 SV=1	484.851	true	2	1	0	7	228586	128	13	9	13	9	31	16	9	4	7	5	2	5	4	2	9	5	1	1	1	0	1	1	0	10	1	2.87994e+06	10552406	17272346	1.61142e+06	12248468	34679300	18568.5	40880640	32029924	1.65268e+06	12839879
452064	CTBP1_MOUSE	Ctbp1	CTBP1_MOUSE		sp|O88712|CTBP1_MOUSE C-terminal-binding protein 1 OS=Mus musculus OX=10090 GN=Ctbp1 PE=1 SV=2	48.315	true	2	1	0	4.76	47745	23	2	2	2	2	3	3	2		2	1	1	2			2		0	0	0	0	1	0	0	2	0		154440	189546	50908.3	504340			1.10325e+06		12446.4	46258.6
451027	RD23B_MOUSE	Rad23b	RD23B_MOUSE	RD23A_MOUSE	sp|P54728|RD23B_MOUSE UV excision repair protein RAD23 homolog B OS=Mus musculus OX=10090 GN=Rad23b PE=1 SV=2	50.313	true	2	1	1	4.09	43513	15	2	2	2	2	2	2	2		2	1	1	2	1	1	1	1	0	0	0	0	2	0	0	0	0		866940	208360	190997	1.63831e+06	13743	2628.29	2981581	196196	12446.4	518814
450608	ARF6_MOUSE	Arf6	ARF6_MOUSE		sp|P62331|ARF6_MOUSE ADP-ribosylation factor 6 OS=Mus musculus OX=10090 GN=Arf6 PE=1 SV=2	30.33	true	2	1	0	6.29	20082	9	1	1	1	1	1	1	1			1		1	1		1		0	0	0	0	0	0	0	1	0			196416		588474	162814		2.54438e+06		12446.4	12408.4
451614	STAG1_MOUSE	Stag1	STAG1_MOUSE; STAG2_MOUSE		sp|Q9D3E6|STAG1_MOUSE Cohesin subunit SA-1 OS=Mus musculus OX=10090 GN=Stag1 PE=1 SV=3	19.201	true	2	2	0	0.79	144438	68	1	1	1	1	1	1	1					1			1		0	0	0	0	1	0	0	0	0					347308			376131		12446.4	12408.4
451191	BDH2_MOUSE	Bdh2	BDH2_MOUSE		sp|Q8JZV9|BDH2_MOUSE 3-hydroxybutyrate dehydrogenase type 2 OS=Mus musculus OX=10090 GN=Bdh2 PE=1 SV=1	23.713	true	2	1	0	4.9	26752	14	1	1	1	1	1	1	1								1		0	0	0	0	0	0	0	1	0								370929		12446.4	12408.4
451528	LYPA1_MOUSE	Lypla1	LYPA1_MOUSE		sp|P97823|LYPA1_MOUSE Acyl-protein thioesterase 1 OS=Mus musculus OX=10090 GN=Lypla1 PE=1 SV=1	11.531	true	2	1	0	3.48	24688	12	1	1	1	1	1	1	1		1	1		1	1	1	1	1	0	1	0	0	0	0	0	0	0		466345	188859		388991	346191	5519.57	3.73703e+06	136455	12446.4	289409
451607	CAPR1_MOUSE	Caprin1	CAPR1_MOUSE		sp|Q60865|CAPR1_MOUSE Caprin-1 OS=Mus musculus OX=10090 GN=Caprin1 PE=1 SV=2	72.604	true	2	1	0	2.69	78169	23	2	2	2	2	4	4	2	1	2	2	2	2	2		2	2	0	0	1	1	0	1	0	1	0	116006	332260	593169	719593	1.87373e+06	523556		2.71871e+06	241390	7143.96	138603
450646	HNRH1_MOUSE	Hnrnph1	HNRH1_MOUSE		sp|O35737|HNRH1_MOUSE Heterogeneous nuclear ribonucleoprotein H OS=Mus musculus OX=10090 GN=Hnrnph1 PE=1 SV=3	164.191	true	2	1	0	13.14	49199	26	4	1	4	1	8	1	1			1			1			1	0	0	0	0	0	1	0	0	0	967983	1.75114e+06	1.4862e+06	390455	3663891	1363705		6847656	195910	12446.4	12408.4
451951	UGPA_MOUSE	Ugp2	UGPA_MOUSE		sp|Q91ZJ5|UGPA_MOUSE UTP--glucose-1-phosphate uridylyltransferase OS=Mus musculus OX=10090 GN=Ugp2 PE=1 SV=3	93.318	true	2	1	0	5.31	56979	30	3	3	3	3	5	5	3		2	2	2	2	1		3	2	0	0	0	0	1	0	0	3	0		798038	435890	143896	1.60106e+06	125492		8201794	145326	12446.4	425808
451476	AP3D1_MOUSE	Ap3d1	AP3D1_MOUSE		sp|O54774|AP3D1_MOUSE AP-3 complex subunit delta-1 OS=Mus musculus OX=10090 GN=Ap3d1 PE=1 SV=1	18.952	true	2	1	0	0.67	135081	62	1	1	1	1	1	1	1					1			1	1	0	0	0	0	0	0	0	1	0					247637			382221	11778.7	12446.4	12408.4
451198	AIFM1_MOUSE	Aifm1	AIFM1_MOUSE		sp|Q9Z0X1|AIFM1_MOUSE Apoptosis-inducing factor 1, mitochondrial OS=Mus musculus OX=10090 GN=Aifm1 PE=1 SV=1	22.71	true	2	1	0	1.8	66765	34	1	1	1	1	1	1	1	1		1	1	1	1		1	1	0	0	0	0	0	0	0	1	0	42263.6		60893.1	31949.8	194415	60334.6		486908	64947.3	42263.6	12408.4
451579	PURA_MOUSE	Pura	PURA_MOUSE		sp|P42669|PURA_MOUSE Transcriptional activator protein Pur-alpha OS=Mus musculus OX=10090 GN=Pura PE=1 SV=1	141.306	true	2	1	0	11.21	34884	14	4	4	4	4	12	12	4	2	2	2	2	3	4		2	4	1	0	0	1	2	4	0	1	3	1.75701e+06	595614	258701	594807	1.58606e+06	6614647		750800	2.12563e+06	183631	58401.8
451250	COPG2_MOUSE	Copg2	COPG2_MOUSE		sp|Q9QXK3|COPG2_MOUSE Coatomer subunit gamma-2 OS=Mus musculus OX=10090 GN=Copg2 PE=1 SV=1	52.845	true	2	1	0	2.07	97681	48	2	2	2	2	2	2	2	1		1		2	1		2	1	0	0	0	0	1	0	0	1	0	269277		129021		645096	90054.2		1.32928e+06	11166.8	49084.5	12408.4
451181	UBP5_MOUSE	Usp5	UBP5_MOUSE		sp|P56399|UBP5_MOUSE Ubiquitin carboxyl-terminal hydrolase 5 OS=Mus musculus OX=10090 GN=Usp5 PE=1 SV=1	98.15	true	2	1	0	4.08	95833	45	3	3	3	3	4	4	3	1	2	2	2	3	2		2	2	0	0	0	0	1	0	0	2	1	334674	577823	316652	311853	1.7229e+06	318447		3778432	344829	13860.7	338803
451237	RBM12_MOUSE	Rbm12	RBM12_MOUSE		sp|Q8R4X3|RBM12_MOUSE RNA-binding protein 12 OS=Mus musculus OX=10090 GN=Rbm12 PE=1 SV=3	32.947	true	2	1	0	1.01	102796	37	1	1	1	1	1	1	1					1			1		0	0	0	0	0	0	0	1	0					145735			332599		12446.4	12408.4
451601	SEM7A_MOUSE	Sema7a	SEM7A_MOUSE		sp|Q9QUR8|SEM7A_MOUSE Semaphorin-7A OS=Mus musculus OX=10090 GN=Sema7a PE=1 SV=1	49.269	true	2	1	0	1.96	74994	47	1	1	1	1	1	1	1							1	1		0	0	0	0	0	0	0	1	0							4641.47	274783		12446.4	12408.4
450932	IASPP_MOUSE	Ppp1r13l	IASPP_MOUSE		sp|Q5I1X5|IASPP_MOUSE RelA-associated inhibitor OS=Mus musculus OX=10090 GN=Ppp1r13l PE=1 SV=1	24.253	true	2	1	0	1.58	88974	39	1	1	1	1	1	1	1								1		0	0	0	0	0	0	0	1	0								329129		12446.4	12408.4
451695	CPT2_MOUSE	Cpt2	CPT2_MOUSE		sp|P52825|CPT2_MOUSE Carnitine O-palmitoyltransferase 2, mitochondrial OS=Mus musculus OX=10090 GN=Cpt2 PE=1 SV=2	28.831	true	2	1	0	1.37	73979	44	1	1	1	1	1	1	1								1		0	0	0	0	0	0	0	1	0								322105		12446.4	12408.4
451348	BCAT2_MOUSE	Bcat2	BCAT2_MOUSE		sp|O35855|BCAT2_MOUSE Branched-chain-amino-acid aminotransferase, mitochondrial OS=Mus musculus OX=10090 GN=Bcat2 PE=1 SV=2	49.75	true	2	1	0	5.34	44127	22	2	2	2	2	2	2	2	1	1	2	1	2	2		2		0	0	0	0	1	0	0	1	0	98693.6	117927	327651	26269	735288	173227		1417852		11052.6	7512.69
451380	TPC6B_MOUSE	Trappc6b	TPC6B_MOUSE		sp|Q9D289|TPC6B_MOUSE Trafficking protein particle complex subunit 6B OS=Mus musculus OX=10090 GN=Trappc6b PE=1 SV=1	27.377	true	2	1	0	5.7	17935	14	1	1	1	1	1	1	1			1	1	1			1		0	0	0	0	0	0	0	1	0			45601.8	103635	84360.8			495457		12446.4	12408.4
450995	RS10_MOUSE	Rps10	RS10_MOUSE		sp|P63325|RS10_MOUSE 40S ribosomal protein S10 OS=Mus musculus OX=10090 GN=Rps10 PE=1 SV=1	139.05	true	2	1	0	14.55	18916	12	3	3	3	3	7	7	3		1	3		3	2		3		0	0	3	0	2	0	0	2	0		223690	881866		2341894	422753		4.24585e+06		12446.4	5873.11
450540	KRT85_MOUSE	Krt85	KRT85_MOUSE	KRT87_MOUSE	sp|Q9Z2T6|KRT85_MOUSE Keratin, type II cuticular Hb5 OS=Mus musculus OX=10090 GN=Krt85 PE=1 SV=2	160.471	true	2	1	1	11.05	55759	35	6	2	6	2	12	2	2		2	2	1	2	2	1	2	1	0	1	0	0	0	0	0	1	0	353256160	14621526	3.0652e+06	10181078	4.81829e+06	3.92698e+06	20160.5	12336897	156559	12446.4	198057
451903	PUF60_MOUSE	Puf60	PUF60_MOUSE		sp|Q3UEB3|PUF60_MOUSE Poly(U)-binding-splicing factor PUF60 OS=Mus musculus OX=10090 GN=Puf60 PE=1 SV=2	125.55	true	2	1	0	5.32	60249	30	3	3	3	3	5	5	3	1	1	3	1	3	3		3		0	0	0	0	1	0	0	4	0	109338	160547	496080	62419.6	1.80864e+06	629344		2.65947e+06		10619.4	7610.27
451544	MARE2_MOUSE	Mapre2	MARE2_MOUSE		sp|Q8R001|MARE2_MOUSE Microtubule-associated protein RP/EB family member 2 OS=Mus musculus OX=10090 GN=Mapre2 PE=1 SV=1	26.224	true	2	1	0	2.45	36945	19	1	1	1	1	1	1	1			1		1			1		0	0	0	0	0	0	0	1	0			171559		573812			1.85177e+06		12446.4	12408.4
451061	S10AA_MOUSE	S100a10	S10AA_MOUSE		sp|P08207|S10AA_MOUSE Protein S100-A10 OS=Mus musculus OX=10090 GN=S100a10 PE=1 SV=2	42.898	true	2	1	0	17.53	11186	5	2	2	2	2	5	5	2	1	1	1	1	1	1	1	2	1	0	1	1	0	0	0	0	3	0	512582	892334	302729	341279	560661	376584	16254.4	7638833	348132	237832	242881
451586	MCTS1_MOUSE	Mcts1	MCTS1_MOUSE		sp|Q9DB27|MCTS1_MOUSE Malignant T-cell-amplified sequence 1 OS=Mus musculus OX=10090 GN=Mcts1 PE=1 SV=1	23.806	true	2	1	0	4.97	20555	10	1	1	1	1	1	1	1		1	1		1	1		1	1	0	0	0	0	0	0	0	1	0		173143	190977		397397	101066		1.56592e+06	148614	12446.4	107451
451777	GNAS1_MOUSE	Gnas	GNAS1_MOUSE; GNAS2_MOUSE		sp|Q6R0H7|GNAS1_MOUSE Guanine nucleotide-binding protein G(s) subunit alpha isoforms XLas OS=Mus musculus OX=10090 GN=Gnas PE=1 SV=1	68.47	true	2	2	0	2.03	121505	51	2	2	2	2	2	2	2		1	2		2	1		2		0	0	1	0	1	0	0	0	0		79415.4	211841		576808	104672		721926		12446.4	5924.37
451893	MA2A1_MOUSE	Man2a1	MA2A1_MOUSE		sp|P27046|MA2A1_MOUSE Alpha-mannosidase 2 OS=Mus musculus OX=10090 GN=Man2a1 PE=1 SV=2	22.265	true	2	1	0	1.13	131631	63	1	1	1	1	1	1	1					1			1		0	0	0	0	1	0	0	0	0					254547			308903		12446.4	12408.4
450703	LS14A_MOUSE	Lsm14a	LS14A_MOUSE		sp|Q8K2F8|LS14A_MOUSE Protein LSM14 homolog A OS=Mus musculus OX=10090 GN=Lsm14a PE=1 SV=1	29.262	true	2	1	0	1.73	50546	24	1	1	1	1	1	1	1					1		1	1		0	0	0	0	0	0	0	1	0					92547.2		3255.98	360695		12446.4	12408.4
451146	IST1_MOUSE	Ist1	IST1_MOUSE		sp|Q9CX00|IST1_MOUSE IST1 homolog OS=Mus musculus OX=10090 GN=Ist1 PE=1 SV=1	29.191	true	2	1	0	4.7	39468	14	2	2	2	2	2	2	2		2	2		1	2		2	1	0	0	0	0	1	0	0	1	0		216362	290300		452837	306530		1.39814e+06	82995	12446.4	90029.6
451923	ITIH2_MOUSE	Itih2	ITIH2_MOUSE		sp|Q61703|ITIH2_MOUSE Inter-alpha-trypsin inhibitor heavy chain H2 OS=Mus musculus OX=10090 GN=Itih2 PE=1 SV=1	52.584	true	2	1	0	1.69	105928	51	2	2	2	2	3	3	2	1	1	1	1	1	1	2	1	1	1	0	0	1	0	0	1	0	0	922888	63488	116157	755066	24302.5	88300.3	241244	23286.7	89747.1	199766	11511.2
450861	RRS1_MOUSE	Rrs1	RRS1_MOUSE		sp|Q9CYH6|RRS1_MOUSE Ribosome biogenesis regulatory protein homolog OS=Mus musculus OX=10090 GN=Rrs1 PE=1 SV=1	36.385	true	2	1	0	4.93	41551	22	2	2	2	2	2	2	2	2	1	2	1	2	2		2	2	0	1	0	0	1	0	0	0	0	605417	284541	370678	238521	1.29369e+06	1151657		1.28565e+06	104744	56387.1	15623.9
450997	GSTO1_MOUSE	Gsto1	GSTO1_MOUSE; GSTO2_MOUSE		sp|O09131|GSTO1_MOUSE Glutathione S-transferase omega-1 OS=Mus musculus OX=10090 GN=Gsto1 PE=1 SV=2	24.795	true	2	2	0	3.75	27498	17	1	1	1	1	1	1	1			1		1			1		0	0	0	0	1	0	0	0	0			172397		482767			1.75935e+06		12446.4	12408.4
451402	NDKA_MOUSE	Nme1	NDKA_MOUSE	NDKB_MOUSE	sp|P15532|NDKA_MOUSE Nucleoside diphosphate kinase A OS=Mus musculus OX=10090 GN=Nme1 PE=1 SV=1	96.029	true	2	1	1	30.92	17208	13	4	4	4	4	11	11	4	1	2	3		4	3		4	1	0	1	0	0	4	1	0	4	1	25751	995004	11039501		17604798	5.28481e+06		44478048	2.96273e+06	9826.32	90651.7
451087	DOCK8_MOUSE	Dock8	DOCK8_MOUSE		sp|Q8C147|DOCK8_MOUSE Dedicator of cytokinesis protein 8 OS=Mus musculus OX=10090 GN=Dock8 PE=1 SV=4	75.128	true	2	1	0	1.14	238978	118	2	2	2	2	2	2	2	1	2	2	1	2	2	1	2	1	0	0	0	0	2	0	0	0	0	54698.9	474888	219535	73320.5	651870	252903	24727.1	421576	134699	15862.6	284576
451791	EIF3M_MOUSE	Eif3m	EIF3M_MOUSE		sp|Q99JX4|EIF3M_MOUSE Eukaryotic translation initiation factor 3 subunit M OS=Mus musculus OX=10090 GN=Eif3m PE=1 SV=1	58.681	true	2	1	0	4.81	42517	22	1	1	1	1	1	1	1			1		1			1		0	0	0	0	0	0	0	1	0			60203.8		178488			594387		12446.4	12408.4
450901	ODPB_MOUSE	Pdhb	ODPB_MOUSE		sp|Q9D051|ODPB_MOUSE Pyruvate dehydrogenase E1 component subunit beta, mitochondrial OS=Mus musculus OX=10090 GN=Pdhb PE=1 SV=1	22.349	true	2	1	0	4.18	38937	21	2	2	2	2	2	2	2	1	2	2	1	2	2		2	1	0	0	0	0	0	0	0	2	0	11553.9	397952	411477	45232.9	950087	330014		1.13527e+06	364725	7466.26	223088
451979	RMD1_MOUSE	Rmdn1	RMD1_MOUSE		sp|Q9DCV4|RMD1_MOUSE Regulator of microtubule dynamics protein 1 OS=Mus musculus OX=10090 GN=Rmdn1 PE=1 SV=2	6.083	true	2	1	0	2.3	34999	22	1	1	1	1	1	1	1			1		1			1		0	0	0	0	0	0	0	1	0			25685		58024			247491		12446.4	12408.4
451530	RPC4_MOUSE	Polr3d	RPC4_MOUSE		sp|Q91WD1|RPC4_MOUSE DNA-directed RNA polymerase III subunit RPC4 OS=Mus musculus OX=10090 GN=Polr3d PE=2 SV=2	6.083	true	2	1	0	1.76	44356	25	1	1	1	1	1	1	1			1		1			1		0	0	0	0	0	0	0	1	0			25685		58024			247491		12446.4	12408.4
450689	SNG1_MOUSE	Syngr1	SNG1_MOUSE		sp|O55100|SNG1_MOUSE Synaptogyrin-1 OS=Mus musculus OX=10090 GN=Syngr1 PE=1 SV=2	45.416	true	2	1	0	5.13	25653	5	1	1	1	1	1	1	1		1						1	1	0	0	0	0	0	0	0	1	0		79863.4						509758	29147.3	12446.4	49562.3
452000	PLDX1_MOUSE	Plxdc1	PLDX1_MOUSE		sp|Q91ZV7|PLDX1_MOUSE Plexin domain-containing protein 1 OS=Mus musculus OX=10090 GN=Plxdc1 PE=1 SV=2	35.83	true	2	1	0	1.4	55634	22	1	1	1	1	1	1	1		1		1	1			1	1	0	0	0	0	0	0	0	1	0		3085.08		3031.75	463321			49903.9	11163.9	12446.4	1914.56
450632	AL1L1_MOUSE	Aldh1l1	AL1L1_MOUSE		sp|Q8R0Y6|AL1L1_MOUSE Cytosolic 10-formyltetrahydrofolate dehydrogenase OS=Mus musculus OX=10090 GN=Aldh1l1 PE=1 SV=1	25.541	true	2	1	0	1.22	98708	64	1	1	1	1	1	1	1	1			1				1		0	0	0	0	0	0	0	1	0	136172			87892.9				2.96769e+06		136172	12408.4
451128	AP2M1_MOUSE	Ap2m1	AP2M1_MOUSE		sp|P84091|AP2M1_MOUSE AP-2 complex subunit mu OS=Mus musculus OX=10090 GN=Ap2m1 PE=1 SV=1	56.73	true	2	1	0	3.91	49654	29	2	2	2	2	3	3	2	2	1	2	2	2	2		2	2	0	0	0	0	0	0	0	2	1	2.03908e+06	662983	641087	187108	4.12475e+06	2.8263e+06		6444152	958276	1.34315e+06	16214.7
452070	MAP2_MOUSE	Metap2	MAP2_MOUSE		sp|O08663|MAP2_MOUSE Methionine aminopeptidase 2 OS=Mus musculus OX=10090 GN=Metap2 PE=1 SV=1	49.318	true	2	1	0	4.18	52922	30	2	2	2	2	2	2	2		2	2	1	2	2		2	1	0	0	0	0	1	0	0	1	0		147661	543388	80746.9	732156	431620		1.41668e+06	77609.3	12446.4	40665.1
450664	PRS8_MOUSE	Psmc5	PRS8_MOUSE		sp|P62196|PRS8_MOUSE 26S proteasome regulatory subunit 8 OS=Mus musculus OX=10090 GN=Psmc5 PE=1 SV=1	129.33	true	2	1	0	8.62	45626	28	3	3	3	3	4	4	3		1	1		2	1		3		0	0	0	0	1	0	0	3	0		690697	267680		568688	95508.1		2.17608e+06		12446.4	71736.4
451980	PLCH1_MOUSE	Plch1	PLCH1_MOUSE		sp|Q4KWH5|PLCH1_MOUSE 1-phosphatidylinositol 4,5-bisphosphate phosphodiesterase eta-1 OS=Mus musculus OX=10090 GN=Plch1 PE=2 SV=1	41.471	true	2	1	0	1.01	187743	96	2	2	2	2	3	3	2	2	1	2	1	2	1		2		0	0	0	0	1	0	0	2	0	269572	110263	110172	168788	329699	72891.7		3.92408e+06		95301.2	16256
451927	SDHB_MOUSE	Sdhb	SDHB_MOUSE		sp|Q9CQA3|SDHB_MOUSE Succinate dehydrogenase [ubiquinone] iron-sulfur subunit, mitochondrial OS=Mus musculus OX=10090 GN=Sdhb PE=1 SV=1	49.437	true	2	1	0	5.67	31814	23	2	2	2	2	3	3	2		2	1	1	2	1	1	1	1	0	0	0	1	1	0	0	0	1		460003	231049	95078.6	1.48974e+06	103537	14703.9	386562	198165	12446.4	230983
451676	TCTP_MOUSE	Tpt1	TCTP_MOUSE		sp|P63028|TCTP_MOUSE Translationally-controlled tumor protein OS=Mus musculus OX=10090 GN=Tpt1 PE=1 SV=1	61.923	true	2	1	0	7.56	19462	6	1	1	2	2	2	2	2		1	2		2	1		2		0	0	0	0	0	0	0	2	0		294692	361301		1.42321e+06	176951		4533957		12446.4	28176.1
452035	KAT3_MOUSE	Kyat3	KAT3_MOUSE		sp|Q71RI9|KAT3_MOUSE Kynurenine--oxoglutarate transaminase 3 OS=Mus musculus OX=10090 GN=Kyat3 PE=1 SV=1	22.784	true	2	1	0	1.98	51125	25	1	1	1	1	1	1	1		1	1	1	1	1		1	1	0	0	0	0	0	0	0	1	0		91207.4	127700	31535.8	272190	117925		855490	79659.6	12446.4	56602.3
451205	KAT1_MOUSE	Kyat1	KAT1_MOUSE		sp|Q8BTY1|KAT1_MOUSE Kynurenine--oxoglutarate transaminase 1 OS=Mus musculus OX=10090 GN=Kyat1 PE=1 SV=1	22.784	true	2	1	0	2.12	47562	18	1	1	1	1	1	1	1		1	1	1	1	1		1	1	0	0	0	0	0	0	0	1	0		91207.4	127700	31535.8	272190	117925		855490	79659.6	12446.4	56602.3
450800	STK24_MOUSE	Stk24	STK24_MOUSE		sp|Q99KH8|STK24_MOUSE Serine/threonine-protein kinase 24 OS=Mus musculus OX=10090 GN=Stk24 PE=1 SV=1	22.653	true	2	1	0	2.09	47954	20	1	1	1	1	1	1	1			1		1	1		1		0	0	0	0	0	0	0	1	0			74870.7		160063	43740.7		660589		12446.4	12408.4
451670	SRC8_MOUSE	Cttn	SRC8_MOUSE		sp|Q60598|SRC8_MOUSE Src substrate cortactin OS=Mus musculus OX=10090 GN=Cttn PE=1 SV=2	70.399	true	2	1	0	5.13	61250	29	3	3	3	3	3	3	3	3	2	1	1	3	3	1	3	2	0	0	0	0	0	0	0	3	0	471418	141932	58019.1	29415.6	454339	264205	5409.98	4.43781e+06	40295.6	493273	66227.7
452022	GCN1_MOUSE	Gcn1	GCN1_MOUSE		sp|E9PVA8|GCN1_MOUSE eIF-2-alpha kinase activator GCN1 OS=Mus musculus OX=10090 GN=Gcn1 PE=1 SV=1	72.833	true	2	1	0	1.12	293021	175	3	3	3	3	3	3	2	1	1	1	1	1	1		2	1	0	0	0	0	0	0	0	2	0	54127.1	194395	131567	48812.6	673977	184396		1.05397e+06	25853	25148.1	48199
450818	SNAG_MOUSE	Napg	SNAG_MOUSE		sp|Q9CWZ7|SNAG_MOUSE Gamma-soluble NSF attachment protein OS=Mus musculus OX=10090 GN=Napg PE=1 SV=1	22.128	true	2	1	0	2.88	34732	20	1	1	1	1	1	1	1		1	1		1	1		1	1	0	0	0	0	1	0	0	0	0		66612.4	74174.5		253965	53217.6		784355	36303.6	12446.4	41338.9
451997	CSN7A_MOUSE	Cops7a	CSN7A_MOUSE		sp|Q9CZ04|CSN7A_MOUSE COP9 signalosome complex subunit 7a OS=Mus musculus OX=10090 GN=Cops7a PE=1 SV=2	34.063	true	2	1	0	4.36	30224	16	1	1	1	1	1	1	1			1		1	1		1		0	0	0	0	0	0	0	1	0			60944.8		192543	224320		522977		12446.4	12408.4
451845	TPPC3_MOUSE	Trappc3	TPPC3_MOUSE		sp|O55013|TPPC3_MOUSE Trafficking protein particle complex subunit 3 OS=Mus musculus OX=10090 GN=Trappc3 PE=1 SV=1	35.967	true	2	1	0	10.56	20302	9	2	2	2	2	2	2	2	1	1	2		1	1		2		0	0	0	0	0	0	0	2	0	108765	107058	202528		211632	43765.2		2046031		22201	13736.1
452003	COG4_MOUSE	Cog4	COG4_MOUSE		sp|Q8R1U1|COG4_MOUSE Conserved oligomeric Golgi complex subunit 4 OS=Mus musculus OX=10090 GN=Cog4 PE=1 SV=1	35.178	true	2	1	0	2.17	88659	54	1	1	1	1	1	1	1			1		1	1		1		0	0	0	0	0	0	0	1	0			25874.6		46424.7	28756.5		215731		12446.4	12408.4
450744	PFD1_MOUSE	Pfdn1	PFD1_MOUSE		sp|Q9CWM4|PFD1_MOUSE Prefoldin subunit 1 OS=Mus musculus OX=10090 GN=Pfdn1 PE=1 SV=1	31.585	true	2	1	0	9.02	14255	9	1	1	1	1	1	1	1	1				1			1		0	0	0	0	0	0	0	1	0	43651.3				130307			856232		43651.3	12408.4
451141	TRI29_MOUSE	Trim29	TRI29_MOUSE		sp|Q8R2Q0|TRI29_MOUSE Tripartite motif-containing protein 29 OS=Mus musculus OX=10090 GN=Trim29 PE=1 SV=1	78.282	true	2	1	0	4.43	65819	42	3	3	3	3	3	3	3	1	1	3	1	2	1		3	1	0	0	0	0	0	0	0	3	0	173305	193054	66829.4	150766	192201	68677.1		10817558	32889.4	83288.3	55815.8
450727	COPB_MOUSE	Copb1	COPB_MOUSE		sp|Q9JIF7|COPB_MOUSE Coatomer subunit beta OS=Mus musculus OX=10090 GN=Copb1 PE=1 SV=1	58.384	true	2	1	0	1.89	107066	57	2	2	2	2	3	3	2	1	1	2		2	1		2		0	1	0	0	1	0	0	1	0	120123	169691	949105		1.76908e+06	226549		3506948		13847.6	9151.99
452031	RAD_MOUSE	Rrad	RAD_MOUSE		sp|O88667|RAD_MOUSE GTP-binding protein RAD OS=Mus musculus OX=10090 GN=Rrad PE=1 SV=1	20.694	true	2	1	0	3.57	33279	12	1	1	1	1	1	1	1								1		0	0	0	0	0	0	0	1	0								236586		12446.4	12408.4
452061	DNJC2_MOUSE	Dnajc2	DNJC2_MOUSE		sp|P54103|DNJC2_MOUSE DnaJ homolog subfamily C member 2 OS=Mus musculus OX=10090 GN=Dnajc2 PE=1 SV=2	16.048	true	2	1	0	1.29	71722	33	1	1	1	1	1	1	1	1	1	1	1	1	1		1	1	0	0	0	0	0	0	0	1	0	7031.91	201561	182399	10623.3	495642	197868		541144	203682	7031.91	125086
451465	ERP29_MOUSE	Erp29	ERP29_MOUSE		sp|P57759|ERP29_MOUSE Endoplasmic reticulum resident protein 29 OS=Mus musculus OX=10090 GN=Erp29 PE=1 SV=2	57.152	true	2	1	0	7.25	28823	13	2	2	2	2	5	5	2	2	1	1	1	1	1		1	2	1	1	0	0	1	0	0	1	1	536914	826896	651750	266824	2.04259e+06	162378		1.04607e+06	434918	98553	39206.1
450668	BUD31_MOUSE	Bud31	BUD31_MOUSE		sp|Q6PGH1|BUD31_MOUSE Protein BUD31 homolog OS=Mus musculus OX=10090 GN=Bud31 PE=1 SV=2	23.956	true	2	1	0	5.56	16999	9	1	1	1	1	1	1	1			1			1		1	1	0	0	0	0	0	1	0	0	0			67429.9			364467		271613	26219.8	12446.4	12408.4
450931	UBA3_MOUSE	Uba3	UBA3_MOUSE		sp|Q8C878|UBA3_MOUSE NEDD8-activating enzyme E1 catalytic subunit OS=Mus musculus OX=10090 GN=Uba3 PE=1 SV=2	23.315	true	2	1	0	1.52	51737	23	1	1	1	1	1	1	1	1	1	1		1	1		1	1	0	0	0	0	0	0	0	1	0	12583	71386.6	59093.4		106312	21895.2		509860	43857	12583	44301.7
451743	PDCD5_MOUSE	Pdcd5	PDCD5_MOUSE		sp|P56812|PDCD5_MOUSE Programmed cell death protein 5 OS=Mus musculus OX=10090 GN=Pdcd5 PE=1 SV=3	37.672	true	2	1	0	8.73	14275	10	1	1	1	1	1	1	1					1			1		0	0	0	0	1	0	0	0	0					528489			232304		12446.4	12408.4
450974	VPS4B_MOUSE	Vps4b	VPS4B_MOUSE	VPS4A_MOUSE	sp|P46467|VPS4B_MOUSE Vacuolar protein sorting-associated protein 4B OS=Mus musculus OX=10090 GN=Vps4b PE=1 SV=2	75.618	true	2	1	1	7.43	49419	27	3	3	3	3	3	3	3	1	1	2	1	1	1		3		0	0	0	0	0	0	0	3	0	68946.2	71707.4	188319	45781.4	270508	83941.1		2.93396e+06		26899	17287.9
451425	AOFB_MOUSE	Maob	AOFB_MOUSE		sp|Q8BW75|AOFB_MOUSE Amine oxidase [flavin-containing] B OS=Mus musculus OX=10090 GN=Maob PE=1 SV=4	30.176	true	2	1	0	1.54	58557	33	1	1	1	1	1	1	1		1				1		1		0	0	0	0	0	0	0	1	0		44934.9				17377		521643		12446.4	27886.1
451050	AOFA_MOUSE	Maoa	AOFA_MOUSE		sp|Q64133|AOFA_MOUSE Amine oxidase [flavin-containing] A OS=Mus musculus OX=10090 GN=Maoa PE=1 SV=3	30.176	true	2	1	0	1.52	59602	33	1	1	1	1	1	1	1		1				1		1		0	0	0	0	0	0	0	1	0		44934.9				17377		521643		12446.4	27886.1
452133	DPM1_MOUSE	Dpm1	DPM1_MOUSE		sp|O70152|DPM1_MOUSE Dolichol-phosphate mannosyltransferase subunit 1 OS=Mus musculus OX=10090 GN=Dpm1 PE=1 SV=1	65.819	true	2	1	0	8.46	29175	18	2	2	2	2	3	3	2		2	1	1	2	2		2	1	0	0	0	1	0	0	0	2	0		210507	204645	56316.3	596589	135129		1.38411e+06	7151.38	12446.4	100012
451303	MCA3_MOUSE	Eef1e1	MCA3_MOUSE		sp|Q9D1M4|MCA3_MOUSE Eukaryotic translation elongation factor 1 epsilon-1 OS=Mus musculus OX=10090 GN=Eef1e1 PE=1 SV=1	30.931	true	2	1	0	5.17	19859	14	1	1	1	1	1	1	1	1					1		1		0	0	0	0	0	0	0	1	0	55490.6					169346		1.01718e+06		55490.6	12408.4
450881	PEPL_MOUSE	Ppl	PEPL_MOUSE	AGRV1_MOUSE; IIGP5_MOUSE	sp|Q9R269|PEPL_MOUSE Periplakin OS=Mus musculus OX=10090 GN=Ppl PE=1 SV=1	502.401	true	2	1	2	11	204004	144	20	20	20	20	24	24	20	9	11	11	5	11	11	5	20	9	1	0	0	1	1	0	0	21	0	2.84858e+06	1.08267e+06	566128	966185	3.3683e+06	23350950	98037.7	137187392	608194	2.66592e+06	814684
450575	MNDAL_MOUSE	Mndal	MNDAL_MOUSE		sp|D0QMC3|MNDAL_MOUSE Myeloid cell nuclear differentiation antigen-like protein OS=Mus musculus OX=10090 GN=Mndal PE=1 SV=1	190.096	true	2	1	0	11.9	60526	33	6	4	6	4	9	4	4	2	2	2	2	2	2		2	1	2	0	0	0	0	1	0	1	0	3.2214e+06	703689	884551	1.38859e+06	5.94854e+06	5100770	141256	7163842	1.72957e+06	70437.7	146782
450678	KCY_MOUSE	Cmpk1	KCY_MOUSE		sp|Q9DBP5|KCY_MOUSE UMP-CMP kinase OS=Mus musculus OX=10090 GN=Cmpk1 PE=1 SV=1	98.046	true	2	1	0	18.88	22165	12	3	3	3	3	6	6	3		2	2		3	2		2	1	0	1	1	0	1	0	0	2	1		730181	726083		1.57804e+06	164908		2.78845e+06	956921	12446.4	324573
451699	CHP1_MOUSE	Chp1	CHP1_MOUSE		sp|P61022|CHP1_MOUSE Calcineurin B homologous protein 1 OS=Mus musculus OX=10090 GN=Chp1 PE=1 SV=2	44.085	true	2	1	0	6.15	22432	16	1	1	1	1	1	1	1	1							1		0	0	0	0	0	0	0	1	0	75401.3							1.35638e+06		75401.3	12408.4
451844	SC61B_MOUSE	Sec61b	SC61B_MOUSE		sp|Q9CQS8|SC61B_MOUSE Protein transport protein Sec61 subunit beta OS=Mus musculus OX=10090 GN=Sec61b PE=1 SV=3	101.348	true	2	1	0	26.04	9958	6	2	2	2	2	5	5	2		2	2	1	2	2		2	2	0	1	0	0	2	0	0	2	0		1.80153e+06	1.8788e+06	638983	4945195	1.44252e+06		6.84313e+06	631586	12446.4	767990
451401	EIPR1_MOUSE	Eipr1	EIPR1_MOUSE		sp|Q8K0G5|EIPR1_MOUSE EARP and GARP complex-interacting protein 1 OS=Mus musculus OX=10090 GN=Eipr1 PE=1 SV=2	16.445	true	2	1	0	2.33	43126	14	1	1	1	1	1	1	1			1					1		0	0	0	0	0	0	0	1	0			72092.5					540995		12446.4	12408.4
451272	PSMD7_MOUSE	Psmd7	PSMD7_MOUSE		sp|P26516|PSMD7_MOUSE 26S proteasome non-ATPase regulatory subunit 7 OS=Mus musculus OX=10090 GN=Psmd7 PE=1 SV=2	58.288	true	2	1	0	5.3	36540	15	2	2	2	2	2	2	2	1	2	2	2	2	2	1	2	2	0	1	0	0	0	0	0	1	0	670326	605041	843541	392801	1.64203e+06	579244	8177.27	7904603	244499	26001.8	337615
451255	SNX2_MOUSE	Snx2	SNX2_MOUSE		sp|Q9CWK8|SNX2_MOUSE Sorting nexin-2 OS=Mus musculus OX=10090 GN=Snx2 PE=1 SV=2	104.953	true	2	1	0	6.36	58471	32	3	3	3	3	3	3	3		1	2		3	1		2		0	0	0	0	1	0	0	2	0		104956	566671		1.32376e+06	85176.4		1.24081e+06		12446.4	8170.55
452005	ESYT2_MOUSE	Esyt2	ESYT2_MOUSE		sp|Q3TZZ7|ESYT2_MOUSE Extended synaptotagmin-2 OS=Mus musculus OX=10090 GN=Esyt2 PE=1 SV=1	25.888	true	2	1	0	1.07	94139	47	1	1	1	1	1	1	1	1		1	1				1	1	0	0	0	0	0	0	0	1	0	84618.2		33534.7	59418.3				473474	47284.4	84618.2	12408.4
451904	K1C26_MOUSE	Krt26	K1C26_MOUSE		sp|Q3TRJ4|K1C26_MOUSE Keratin, type I cytoskeletal 26 OS=Mus musculus OX=10090 GN=Krt26 PE=2 SV=1	19.428	true	2	1	0	1.95	51118	26	1	1	1	1	1	1	1								1		0	0	0	0	0	0	0	1	0								218378		12446.4	12408.4
451081	DDX47_MOUSE	Ddx47	DDX47_MOUSE		sp|Q9CWX9|DDX47_MOUSE Probable ATP-dependent RNA helicase DDX47 OS=Mus musculus OX=10090 GN=Ddx47 PE=2 SV=2	27.232	true	2	1	0	2.64	50639	26	1	1	1	1	1	1	1					1			1		0	0	0	0	1	0	0	0	0					264494			217113		12446.4	12408.4
451929	RS28_MOUSE	Rps28	RS28_MOUSE		sp|P62858|RS28_MOUSE 40S ribosomal protein S28 OS=Mus musculus OX=10090 GN=Rps28 PE=1 SV=1	90.128	true	2	1	0	13.04	7841	3	1	1	2	2	8	8	2	1	2	2	2	2	2	1	2	2	0	1	0	2	3	0	0	2	0	238581	1.71777e+06	1.41822e+06	439828	2431066	1.30095e+06	15755.4	3057390	521840	6790.23	1.14009e+06
451914	SAP18_MOUSE	Sap18	SAP18_MOUSE		sp|O55128|SAP18_MOUSE Histone deacetylase complex subunit SAP18 OS=Mus musculus OX=10090 GN=Sap18 PE=1 SV=1	114.509	true	2	1	0	28.76	17595	13	5	5	5	5	7	7	5		3	3	1	4	4	1	2	4	0	0	0	0	2	4	0	1	0		3.74426e+06	1.25922e+06	227780	2312807	2.31078e+06	4146.85	3613974	1.96525e+06	12446.4	587259
450769	FAS_MOUSE	Fasn	FAS_MOUSE		sp|P19096|FAS_MOUSE Fatty acid synthase OS=Mus musculus OX=10090 GN=Fasn PE=1 SV=2	252.353	true	2	1	0	2.92	272428	136	7	7	7	7	9	9	6	3	3	4	2	6	4		6	3	0	0	0	1	1	0	0	6	0	469302	788984	488821	293409	1.93529e+06	581945		30275708	137953	122188	120960
451966	ARL1_MOUSE	Arl1	ARL1_MOUSE		sp|P61211|ARL1_MOUSE ADP-ribosylation factor-like protein 1 OS=Mus musculus OX=10090 GN=Arl1 PE=1 SV=1	24.763	true	2	1	0	6.08	20412	10	1	1	1	1	1	1	1			1	1	1	1		1		0	0	0	0	0	1	0	0	0			306572	40553.8	450697	158064		2.12744e+06		12446.4	12408.4
451606	TMED3_MOUSE	Tmed3	TMED3_MOUSE		sp|Q78IS1|TMED3_MOUSE Transmembrane emp24 domain-containing protein 3 OS=Mus musculus OX=10090 GN=Tmed3 PE=1 SV=1	27.716	true	2	1	0	4.52	25465	13	1	1	1	1	1	1	1			1		1	1		1		0	0	0	0	0	0	0	1	0			386620		824417	255283		2.67972e+06		12446.4	12408.4
451239	TPM4_MOUSE	Tpm4	TPM4_MOUSE		sp|Q6IRU2|TPM4_MOUSE Tropomyosin alpha-4 chain OS=Mus musculus OX=10090 GN=Tpm4 PE=1 SV=3	122.992	true	2	1	0	18.95	28468	20	5	5	5	5	6	6	5	2	2	4	2	5	4	1	4	2	0	0	0	0	3	0	0	2	1	47550.2	990031	1314629	61287.2	3079063	870778	16286	5375053	475278	23054.2	168445
451488	VPS51_MOUSE	Vps51	VPS51_MOUSE		sp|Q3UVL4|VPS51_MOUSE Vacuolar protein sorting-associated protein 51 homolog OS=Mus musculus OX=10090 GN=Vps51 PE=1 SV=2	12.618	true	2	1	0	1.15	86187	43	1	1	1	1	1	1	1	1				1			1		0	0	0	0	0	0	0	1	0	30349.1				112791			484537		30349.1	12408.4
452114	RBM39_MOUSE	Rbm39	RBM39_MOUSE		sp|Q8VH51|RBM39_MOUSE RNA-binding protein 39 OS=Mus musculus OX=10090 GN=Rbm39 PE=1 SV=2	29.253	true	2	1	0	2.08	59407	26	1	1	1	1	1	1	1		1	1			1		1	1	0	0	0	0	0	0	0	1	0		2.21713e+06	452088			514424		803944	5561674	12446.4	1375927
452118	PLIN3_MOUSE	Plin3	PLIN3_MOUSE		sp|Q9DBG5|PLIN3_MOUSE Perilipin-3 OS=Mus musculus OX=10090 GN=Plin3 PE=1 SV=1	14.55	true	2	1	0	1.6	47262	29	1	1	1	1	2	2	1	1	1	1	1	1	1	1	1		0	0	0	0	1	0	0	1	0	45067.9	268836	18051.2	25588	1.1063e+06	246317	13042.6	1.74762e+06		45067.9	166837
450607	DHX29_MOUSE	Dhx29	DHX29_MOUSE		sp|Q6PGC1|DHX29_MOUSE ATP-dependent RNA helicase DHX29 OS=Mus musculus OX=10090 GN=Dhx29 PE=1 SV=1	30.537	true	2	1	0	0.88	153975	82	1	1	1	1	1	1	1	1		1	1	1			1	1	0	0	0	0	0	0	0	1	0	48150.4		52205.6	46184.7	136511			457421	39304.8	48150.4	12408.4
451068	TCP4_MOUSE	Sub1	TCP4_MOUSE		sp|P11031|TCP4_MOUSE Activated RNA polymerase II transcriptional coactivator p15 OS=Mus musculus OX=10090 GN=Sub1 PE=1 SV=3	106.304	true	2	1	0	16.54	14427	10	3	3	3	3	9	9	3	1	2	2	1	3	2	1	3	2	1	1	0	1	1	1	0	3	1	1.99009e+06	3.39226e+06	2.88877e+06	991877	1.55245e+06	3157454	6852.6	9748831	808703	61510.3	1.78847e+06
451500	EPN3_MOUSE	Epn3	EPN3_MOUSE		sp|Q91W69|EPN3_MOUSE Epsin-3 OS=Mus musculus OX=10090 GN=Epn3 PE=1 SV=1	97.004	true	2	1	0	4.25	68239	27	3	2	3	2	3	2	1			1		1			1		0	0	0	0	0	0	0	1	0		158814	123740		108727			1617676		12446.4	12408.4
451895	EF1A1_MOUSE	Eef1a1	EF1A1_MOUSE	EF1A2_MOUSE	sp|P10126|EF1A1_MOUSE Elongation factor 1-alpha 1 OS=Mus musculus OX=10090 GN=Eef1a1 PE=1 SV=3	560.271	true	2	1	1	27.06	50114	25	11	11	13	13	50	50	13	6	12	10	6	12	9	5	12	8	3	6	3	6	8	2	1	16	5	51265948	77246464	95313128	5514867	159880624	74619272	8856401	564841088	18861920	1738100	49180436
451860	ARGL1_MOUSE	Arglu1	ARGL1_MOUSE		sp|Q3UL36|ARGL1_MOUSE Arginine and glutamate-rich protein 1 OS=Mus musculus OX=10090 GN=Arglu1 PE=1 SV=2	68.129	true	2	1	0	11.07	32887	15	4	4	4	4	7	7	4	1	3	4	1	4	4	1	3	3	0	2	0	0	1	2	1	0	1	643976	2483393	5977849	962521	7.58309e+06	3.79911e+06	165690	5.49348e+06	2.52905e+06	31953.1	2.05422e+06
450505	RAB1B_MOUSE	Rab1b	RAB1B_MOUSE	RAB12_MOUSE; RAB13_MOUSE; RAB26_MOUSE; RAB30_MOUSE; RAB37_MOUSE; RAB3A_MOUSE; RAB3B_MOUSE; RAB3C_MOUSE; RAB3D_MOUSE; RAB43_MOUSE; RB39B_MOUSE	sp|Q9D1G1|RAB1B_MOUSE Ras-related protein Rab-1B OS=Mus musculus OX=10090 GN=Rab1b PE=1 SV=1	306.315	true	2	1	11	47.26	22187	18	8	2	8	2	11	2	2	1	1	2		2	2		2		0	1	1	0	0	0	0	0	0	5671427	5.84727e+06	9100962	1405121	19503272	6.54316e+06	7378.14	65554752	767573	11002.7	7061.62
451155	SNX5_MOUSE	Snx5	SNX5_MOUSE		sp|Q9D8U8|SNX5_MOUSE Sorting nexin-5 OS=Mus musculus OX=10090 GN=Snx5 PE=1 SV=1	48.962	true	2	1	0	4.46	46797	26	2	2	2	2	2	2	2		1	2		2			2	1	0	0	0	0	2	0	0	0	0		112798	118781		646815			540244	9707.82	12446.4	15441.3
451515	TACC2_MOUSE	Tacc2	TACC2_MOUSE		sp|Q9JJG0|TACC2_MOUSE Transforming acidic coiled-coil-containing protein 2 OS=Mus musculus OX=10090 GN=Tacc2 PE=1 SV=2	10.634	true	2	1	0	0.78	124129	58	1	1	1	1	1	1	1	1	1	1	1		1		1	1	0	0	0	0	0	0	0	1	0	31876.8	48333.9	30172.2	14483.9		34164.4		654016	23690.1	31876.8	29995.4
451354	JMJD7_MOUSE	Jmjd7	JMJD7_MOUSE		sp|P0C872|JMJD7_MOUSE Bifunctional peptidase and (3S)-lysyl hydroxylase Jmjd7 OS=Mus musculus OX=10090 GN=Jmjd7 PE=1 SV=1	37.184	true	2	1	0	2.85	35916	19	1	1	1	1	1	1	1					1			1		0	0	0	0	0	0	0	1	0					35000.7			184090		12446.4	12408.4
451100	PURA2_MOUSE	Adss2	PURA2_MOUSE		sp|P46664|PURA2_MOUSE Adenylosuccinate synthetase isozyme 2 OS=Mus musculus OX=10090 GN=Adss2 PE=1 SV=2	96.053	true	2	1	0	6.58	50021	26	2	2	2	2	4	4	2		1	1		2	1		1	1	0	0	0	0	2	1	0	1	0		363436	447186		2.12511e+06	331897		872601	260035	12446.4	80955.4
451587	CHDH_MOUSE	Chdh	CHDH_MOUSE		sp|Q8BJ64|CHDH_MOUSE Choline dehydrogenase, mitochondrial OS=Mus musculus OX=10090 GN=Chdh PE=1 SV=1	110.027	true	2	1	0	5.03	66413	39	3	3	3	3	3	3	2		1	2	1	2	2		2	1	0	0	0	0	2	0	0	0	0		180746	455268	89961.8	937186	201605		609791	73054	12446.4	15258
451499	PXL2A_MOUSE	Prxl2a	PXL2A_MOUSE		sp|Q9CYH2|PXL2A_MOUSE Peroxiredoxin-like 2A OS=Mus musculus OX=10090 GN=Prxl2a PE=1 SV=2	28.792	true	2	1	0	3.67	24395	15	1	1	1	1	1	1	1								1		0	0	0	0	0	0	0	1	0								180031		12446.4	12408.4
451353	H10_MOUSE	H1-0	H10_MOUSE		sp|P10922|H10_MOUSE Histone H1.0 OS=Mus musculus OX=10090 GN=H1-0 PE=2 SV=4	40.494	true	2	1	0	9.28	20861	7	2	2	2	2	4	4	2	1	1	1	1	2	1		1	1	0	0	1	1	1	0	0	0	1	1.32103e+06	581292	139124	604061	3.66372e+06	1.97497e+06		4.28988e+06	555788	194802	135413
450979	VDAC3_MOUSE	Vdac3	VDAC3_MOUSE		sp|Q60931|VDAC3_MOUSE Voltage-dependent anion-selective channel protein 3 OS=Mus musculus OX=10090 GN=Vdac3 PE=1 SV=1	81.28	true	2	1	0	7.42	30753	17	2	2	2	2	9	9	2	1	2	2	1	2	2		2	1	1	2	1	0	1	0	0	3	1	888414	1.78901e+06	1.7922e+06	133925	6758648	1.72726e+06		20554020	545220	27385.8	1.0674e+06
451930	RL39_MOUSE	Rpl39	RL39_MOUSE		sp|P62892|RL39_MOUSE 60S ribosomal protein L39 OS=Mus musculus OX=10090 GN=Rpl39 PE=1 SV=2	10.034	true	2	1	0	13.73	6406	1	1	1	1	1	1	1	1				1						0	0	0	1	0	0	0	0	0				805876						12446.4	12408.4
450562	KRT36_MOUSE	Krt36	KRT36_MOUSE	K1H2_MOUSE	sp|B1AQ75|KRT36_MOUSE Keratin, type I cuticular Ha6 OS=Mus musculus OX=10090 GN=Krt36 PE=1 SV=1	42.449	true	2	1	1	2.96	52790	30	2	1	2	1	44	1	1				1	1	1				0	0	0	1	0	0	0	0	0	2688946176	2448289792	935571776	824639872	18985030	661695040	342553472	2432156672	302589312	12446.4	12408.4
450777	ATX2L_MOUSE	Atxn2l	ATX2L_MOUSE		sp|Q7TQH0|ATX2L_MOUSE Ataxin-2-like protein OS=Mus musculus OX=10090 GN=Atxn2l PE=1 SV=1	22.353	true	2	1	0	1.05	110649	43	1	1	1	1	1	1	1					1					0	0	0	0	1	0	0	0	0					276568					12446.4	12408.4
451633	CREG1_MOUSE	Creg1	CREG1_MOUSE		sp|O88668|CREG1_MOUSE Protein CREG1 OS=Mus musculus OX=10090 GN=Creg1 PE=1 SV=1	26.019	true	2	1	0	3.18	24452	11	1	1	1	1	1	1	1					1					0	0	0	0	1	0	0	0	0					96880.4					12446.4	12408.4
452084	VP26B_MOUSE	Vps26b	VP26B_MOUSE		sp|Q8C0E2|VP26B_MOUSE Vacuolar protein sorting-associated protein 26B OS=Mus musculus OX=10090 GN=Vps26b PE=1 SV=1	32.422	true	2	1	0	3.27	39125	23	1	1	1	1	1	1	1					1					0	0	0	0	1	0	0	0	0					141932					12446.4	12408.4
451461	HMGN2_MOUSE	Hmgn2	HMGN2_MOUSE		sp|P09602|HMGN2_MOUSE Non-histone chromosomal protein HMG-17 OS=Mus musculus OX=10090 GN=Hmgn2 PE=1 SV=2	28.601	true	2	1	0	10	9423	4	1	1	1	1	1	1	1					1					0	0	0	0	1	0	0	0	0					116547					12446.4	12408.4
450665	SEPT9_MOUSE	Septin9	SEPT9_MOUSE		sp|Q80UG5|SEPT9_MOUSE Septin-9 OS=Mus musculus OX=10090 GN=Septin9 PE=1 SV=1	112.827	true	2	1	0	4.8	65575	43	3	3	3	3	5	5	3	1		2		3	2	1	2	1	0	0	1	0	3	1	0	0	0	203270		745673		2192922	555910	4262.76	1.37678e+06	219609	33301.1	12408.4
452016	RBM14_MOUSE	Rbm14	RBM14_MOUSE		sp|Q8C2Q3|RBM14_MOUSE RNA-binding protein 14 OS=Mus musculus OX=10090 GN=Rbm14 PE=1 SV=1	61.78	true	2	1	0	2.84	69449	26	2	2	2	2	3	3	2	1	1	2		2	1		2		0	0	0	0	2	0	0	1	0	105262	74288.7	209902		755753	102959		1.32567e+06		22903.2	11946.5
450890	PFKAL_MOUSE	Pfkl	PFKAL_MOUSE	PFKAP_MOUSE	sp|P12382|PFKAL_MOUSE ATP-dependent 6-phosphofructokinase, liver type OS=Mus musculus OX=10090 GN=Pfkl PE=1 SV=4	80.256	true	2	1	1	3.59	85360	40	2	1	2	1	2	1	1		1	1			1		1		0	0	0	0	0	0	0	1	0		74700.9	29566.9		67259.5	30434.4		932928		12446.4	46358.5
451034	CB39L_MOUSE	Cab39l	CB39L_MOUSE		sp|Q9DB16|CB39L_MOUSE Calcium-binding protein 39-like OS=Mus musculus OX=10090 GN=Cab39l PE=1 SV=3	21.082	true	2	1	0	2.67	39106	23	1	1	1	1	1	1	1			1		1			1		0	0	0	0	0	0	0	1	0			54650.5		134176			321182		12446.4	12408.4
450713	SF3B1_MOUSE	Sf3b1	SF3B1_MOUSE		sp|Q99NB9|SF3B1_MOUSE Splicing factor 3B subunit 1 OS=Mus musculus OX=10090 GN=Sf3b1 PE=1 SV=1	84.719	true	2	1	0	2.22	145816	73	2	2	2	2	2	2	2	1	2	1		2	1		2		0	0	0	0	0	0	0	2	0	74868.6	264122	112007		743780	171681		1.02069e+06		11849	120359
452081	ILF2_MOUSE	Ilf2	ILF2_MOUSE		sp|Q9CXY6|ILF2_MOUSE Interleukin enhancer-binding factor 2 OS=Mus musculus OX=10090 GN=Ilf2 PE=1 SV=1	65.669	true	2	1	0	7.69	43062	21	2	2	2	2	2	2	2	1	1	2		2	1		2		0	0	0	0	0	0	0	2	0	264876	144748	268596		914412	116087		2.62843e+06		26828	12376.3
451444	FA83G_MOUSE	Fam83g	FA83G_MOUSE		sp|Q5SWY7|FA83G_MOUSE Protein FAM83G OS=Mus musculus OX=10090 GN=Fam83g PE=1 SV=1	48.535	true	2	1	0	1.97	89828	48	2	2	2	2	2	2	2	1	2	2		1	2	1	2	1	0	0	0	0	0	0	0	2	0	50493.3	135174	223638		29912.5	384494	5540.72	533371	13025.9	14498.5	96468
450957	FIBB_MOUSE	Fgb	FIBB_MOUSE		sp|Q8K0E8|FIBB_MOUSE Fibrinogen beta chain OS=Mus musculus OX=10090 GN=Fgb PE=1 SV=1	103.329	true	2	1	0	4.37	54753	29	2	2	2	2	2	2	2		1	2		1	1	1	1	2	0	0	2	0	0	0	0	0	0		309176	636701		86607.3	182378	2808.91	1.71275e+06	553292	12446.4	91961.9
452106	AHSA1_MOUSE	Ahsa1	AHSA1_MOUSE		sp|Q8BK64|AHSA1_MOUSE Activator of 90 kDa heat shock protein ATPase homolog 1 OS=Mus musculus OX=10090 GN=Ahsa1 PE=1 SV=2	59.884	true	2	1	0	5.03	38117	23	2	2	2	2	2	2	2	1	2	2	1	2	2		2	2	0	0	0	0	0	0	0	1	1	287133	739060	492982	174636	1.50338e+06	420334		1.97413e+06	265025	10309.4	390634
451409	SNP29_MOUSE	Snap29	SNP29_MOUSE		sp|Q9ERB0|SNP29_MOUSE Synaptosomal-associated protein 29 OS=Mus musculus OX=10090 GN=Snap29 PE=1 SV=1	33.097	true	2	1	0	4.62	29572	18	1	1	1	1	1	1	1			1		1			1		0	0	0	0	1	0	0	0	0			34009.7		226352			189254		12446.4	12408.4
451543	GET3_MOUSE	Get3	GET3_MOUSE		sp|O54984|GET3_MOUSE ATPase GET3 OS=Mus musculus OX=10090 GN=Get3 PE=1 SV=2	35.098	true	2	1	0	2.01	38823	15	1	1	1	1	1	1	1		1	1		1	1		1	1	0	0	0	0	0	0	0	1	0		134990	136878		874852	131752		1.47267e+06	45904.9	12446.4	83773.4
451394	TM9S2_MOUSE	Tm9sf2	TM9S2_MOUSE		sp|P58021|TM9S2_MOUSE Transmembrane 9 superfamily member 2 OS=Mus musculus OX=10090 GN=Tm9sf2 PE=1 SV=1	18.831	true	2	1	0	1.06	75330	26	1	1	1	1	1	1	1		1	1	1	1	1	1	1	1	0	1	0	0	0	0	0	0	0		340920	240438	67566.1	572146	178859	6215.41	1110661	163101	12446.4	211571
451815	SE1L1_MOUSE	Sel1l	SE1L1_MOUSE		sp|Q9Z2G6|SE1L1_MOUSE Protein sel-1 homolog 1 OS=Mus musculus OX=10090 GN=Sel1l PE=1 SV=2	30.518	true	2	1	0	1.27	88340	41	1	1	1	1	1	1	1		1	1		1	1		1	1	0	0	0	0	0	0	0	1	0		130651	41916.7		81152.6	26146.5		372884	51942.5	12446.4	81080.3
452045	DR9C7_MOUSE	Sdr9c7	DR9C7_MOUSE		sp|Q8K3P0|DR9C7_MOUSE Short-chain dehydrogenase/reductase family 9C member 7 OS=Mus musculus OX=10090 GN=Sdr9c7 PE=2 SV=1	22.306	true	2	1	0	3.83	35148	21	1	1	1	1	1	1	1			1			1		1		0	0	0	0	0	0	0	1	0			166051			85084.2		887315		12446.4	12408.4
450855	EMC3_MOUSE	Emc3	EMC3_MOUSE		sp|Q99KI3|EMC3_MOUSE ER membrane protein complex subunit 3 OS=Mus musculus OX=10090 GN=Emc3 PE=1 SV=3	26.733	true	2	1	0	5.36	29980	14	1	1	1	1	1	1	1			1		1	1		1		0	0	0	0	0	0	0	1	0			49494.9		97172.5	34428.1		263529		12446.4	12408.4
451251	NH2L1_MOUSE	Snu13	NH2L1_MOUSE		sp|Q9D0T1|NH2L1_MOUSE NHP2-like protein 1 OS=Mus musculus OX=10090 GN=Snu13 PE=1 SV=4	80.762	true	2	1	0	14.84	14173	10	2	2	2	2	4	4	2	1	2	1		2	1		1	1	1	1	0	0	2	0	0	0	0	1.98067e+06	1.55496e+06	75153.6		1.89174e+06	600716		715636	531090	20233.3	1.4449e+06
452091	ZW10_MOUSE	Zw10	ZW10_MOUSE		sp|O54692|ZW10_MOUSE Centromere/kinetochore protein zw10 homolog OS=Mus musculus OX=10090 GN=Zw10 PE=1 SV=3	7.218	true	2	1	0	1.03	88061	49	1	1	1	1	1	1	1		1	1		1	1		1		0	0	0	0	0	0	0	1	0		33268.3	32048.5		92157	18945.1		281969		12446.4	20645.9
451365	CSRP1_MOUSE	Csrp1	CSRP1_MOUSE		sp|P97315|CSRP1_MOUSE Cysteine and glycine-rich protein 1 OS=Mus musculus OX=10090 GN=Csrp1 PE=1 SV=3	53.469	true	2	1	0	11.4	20583	15	1	1	1	1	1	1	1			1		1	1		1		0	0	1	0	0	0	0	0	0			151361		461480	115950		799249		12446.4	12408.4
450561	KRT34_MOUSE	Krt34	KRT34_MOUSE; KT33A_MOUSE		sp|Q9D646|KRT34_MOUSE Keratin, type I cuticular Ha4 OS=Mus musculus OX=10090 GN=Krt34 PE=2 SV=1	63.961	true	2	2	0	6.12	44560	26	3	1	3	1	5	3	1	1	1	1	1	1	1	1	1	1	0	0	0	0	2	0	1	0	0	792783	1.42863e+06	354458	5268049	2.429e+06	1.61823e+06	236356	3280116	554304	559440	612920
450972	WASP_MOUSE	Was	WASP_MOUSE		sp|P70315|WASP_MOUSE Wiskott-Aldrich syndrome protein homolog OS=Mus musculus OX=10090 GN=Was PE=1 SV=1	19.807	true	2	1	0	1.92	54192	21	1	1	1	1	1	1	1			1		1	1		1	1	0	0	0	0	1	0	0	0	0			222118		512645	207918		181675	84693.6	12446.4	12408.4
451523	MLF2_MOUSE	Mlf2	MLF2_MOUSE		sp|Q99KX1|MLF2_MOUSE Myeloid leukemia factor 2 OS=Mus musculus OX=10090 GN=Mlf2 PE=1 SV=1	37.091	true	2	1	0	3.64	28054	11	1	1	1	1	2	2	1		1			1			1		0	0	0	0	0	0	0	2	0		124704			160361			955282		12446.4	77390
452041	SC23B_MOUSE	Sec23b	SC23B_MOUSE		sp|Q9D662|SC23B_MOUSE Protein transport protein Sec23B OS=Mus musculus OX=10090 GN=Sec23b PE=1 SV=1	43.644	true	2	1	0	1.43	86437	40	1	1	1	1	1	1	1		1	1		1	1		1	1	0	0	0	0	0	0	0	1	0		152270	116637		194735	72364.7		1.00824e+06	60328.3	12446.4	94497.3
450512	EIF3G_MOUSE	Eif3g	EIF3G_MOUSE		sp|Q9Z1D1|EIF3G_MOUSE Eukaryotic translation initiation factor 3 subunit G OS=Mus musculus OX=10090 GN=Eif3g PE=1 SV=2	32.956	true	2	1	0	2.81	35638	22	1	1	1	1	2	2	1	1	1			1			1		0	0	0	0	1	0	0	1	0	15289	72434.6			837991			677462		15289	44952.1
451287	UBL5_MOUSE	Ubl5	UBL5_MOUSE		sp|Q9EPV8|UBL5_MOUSE Ubiquitin-like protein 5 OS=Mus musculus OX=10090 GN=Ubl5 PE=1 SV=1	16.438	true	2	1	0	12.33	8546	5	1	1	1	1	1	1	1		1	1		1	1		1	1	0	0	0	0	0	1	0	0	0		358811	285163		1.01228e+06	344614		1.11697e+06	311159	12446.4	222674
451132	SEC13_MOUSE	Sec13	SEC13_MOUSE		sp|Q9D1M0|SEC13_MOUSE Protein SEC13 homolog OS=Mus musculus OX=10090 GN=Sec13 PE=1 SV=3	44.441	true	2	1	0	3.42	35566	13	1	1	1	1	1	1	1		1		1	1			1		0	0	0	0	0	0	0	1	0		112187		212409	164508			831642		12446.4	69621.9
452145	C1QC_MOUSE	C1qc	C1QC_MOUSE		sp|Q02105|C1QC_MOUSE Complement C1q subcomponent subunit C OS=Mus musculus OX=10090 GN=C1qc PE=1 SV=2	35.806	true	2	1	0	4.07	25992	12	1	1	1	1	16	16	1	1	1	1	1	1	1	1	1	1	1	2	2	4	1	1	1	2	2	33067452	10779215	10375071	8616299	92062208	10061646	10233617	88739048	4179862	33067452	6.68946e+06
451118	SWP70_MOUSE	Swap70	SWP70_MOUSE		sp|Q6A028|SWP70_MOUSE Switch-associated protein 70 OS=Mus musculus OX=10090 GN=Swap70 PE=1 SV=2	26.9	true	2	1	0	1.37	68996	41	1	1	1	1	1	1	1		1	1	1	1		1			0	0	0	0	1	0	0	0	0		96025.6	23111.1	8710.74	270722		12089.7			12446.4	59592.4
451812	TAP1_MOUSE	Tap1	TAP1_MOUSE		sp|P21958|TAP1_MOUSE Antigen peptide transporter 1 OS=Mus musculus OX=10090 GN=Tap1 PE=1 SV=3	24.284	true	2	1	0	1.24	78864	34	1	1	1	1	1	1	1			1		1	1		1		0	0	0	0	1	0	0	0	0			49963.2		259136	247410		247378		12446.4	12408.4
451263	S38A3_MOUSE	Slc38a3	S38A3_MOUSE		sp|Q9DCP2|S38A3_MOUSE Sodium-coupled neutral amino acid transporter 3 OS=Mus musculus OX=10090 GN=Slc38a3 PE=1 SV=1	21.43	true	2	1	0	1.58	55592	16	1	1	1	1	1	1	1			1		1			1		0	0	0	0	1	0	0	0	0			16699.8		140912			82110.5		12446.4	12408.4
450506	RAB1A_MOUSE	Rab1A	RAB1A_MOUSE	RAB12_MOUSE; RAB13_MOUSE; RAB26_MOUSE; RAB30_MOUSE; RAB37_MOUSE; RAB3A_MOUSE; RAB3B_MOUSE; RAB3C_MOUSE; RAB3D_MOUSE; RAB43_MOUSE; RB39B_MOUSE	sp|P62821|RAB1A_MOUSE Ras-related protein Rab-1A OS=Mus musculus OX=10090 GN=Rab1A PE=1 SV=3	310.704	true	2	1	11	47.32	22677	18	8	2	8	2	11	2	2			1		1			1	1	0	0	0	0	0	0	0	1	1	5388314	5.54876e+06	8942632	1405121	18691464	6230843	7378.14	64408080	899193	12446.4	12408.4
452110	GLNA_MOUSE	Glul	GLNA_MOUSE		sp|P15105|GLNA_MOUSE Glutamine synthetase OS=Mus musculus OX=10090 GN=Glul PE=1 SV=6	29.553	true	2	1	0	5.36	42120	21	1	1	1	1	1	1	1	1		1		1	1		1		0	0	0	0	0	0	0	1	0	226761		46215.2		136198	61842.5		4.06114e+06		226761	12408.4
451957	SF3B3_MOUSE	Sf3b3	SF3B3_MOUSE		sp|Q921M3|SF3B3_MOUSE Splicing factor 3B subunit 3 OS=Mus musculus OX=10090 GN=Sf3b3 PE=1 SV=1	67.513	true	2	1	0	1.56	135550	60	2	2	2	2	3	3	2	1	1	2	1	2	2	1	2	1	0	0	0	0	1	0	0	2	0	261768	510892	477971	291907	1.58166e+06	533207	5057.41	1.93463e+06	314969	51034	46648.3
451308	TYY1_MOUSE	Yy1	TYY1_MOUSE; TYY2_MOUSE		sp|Q00899|TYY1_MOUSE Transcriptional repressor protein YY1 OS=Mus musculus OX=10090 GN=Yy1 PE=1 SV=1	29.984	true	2	2	0	1.93	44717	20	1	1	1	1	1	1	1		1	1		1	1	1	1	1	0	0	0	0	1	0	0	0	0		310907	255772		598831	244052	7662.63	540886	229180	12446.4	192945
451349	CY1_MOUSE	Cyc1	CY1_MOUSE		sp|Q9D0M3|CY1_MOUSE Cytochrome c1, heme protein, mitochondrial OS=Mus musculus OX=10090 GN=Cyc1 PE=1 SV=1	22.71	true	2	1	0	3.69	35328	16	1	1	1	1	1	1	1			1			1		1		0	0	0	0	0	0	0	1	0			176066			128144		830821		12446.4	12408.4
452048	SH3L1_MOUSE	Sh3bgrl	SH3L1_MOUSE		sp|Q9JJU8|SH3L1_MOUSE SH3 domain-binding glutamic acid-rich-like protein OS=Mus musculus OX=10090 GN=Sh3bgrl PE=1 SV=1	23.281	true	2	1	0	8.77	12811	9	1	1	1	1	1	1	1	1							1	1	0	0	0	0	0	0	0	1	0	80447.1							918885	12683.8	80447.1	12408.4
451566	CATG_MOUSE	Ctsg	CATG_MOUSE		sp|P28293|CATG_MOUSE Cathepsin G OS=Mus musculus OX=10090 GN=Ctsg PE=1 SV=2	185.038	true	2	1	0	25.29	29096	13	6	6	6	6	13	13	6	1	2	3	2	4	3		2	4	1	2	2	2	1	1	0	1	3	6662643	10216079	18345976	1.71099e+06	12590944	12647466		19294948	22096540	19546.4	509656
450923	KINH_MOUSE	Kif5b	KINH_MOUSE	KIF5A_MOUSE; KIF5C_MOUSE	sp|Q61768|KINH_MOUSE Kinesin-1 heavy chain OS=Mus musculus OX=10090 GN=Kif5b PE=1 SV=3	124.223	true	2	1	2	3.01	109551	67	3	3	3	3	3	3	3	1	2	3	1	2	2	1	3	1	0	0	0	0	0	0	0	3	0	78751.2	247814	400402	88544.1	556264	319853	12000.5	4.40501e+06	105110	18850.8	152526
451920	WDR13_MOUSE	Wdr13	WDR13_MOUSE		sp|Q91V09|WDR13_MOUSE WD repeat-containing protein 13 OS=Mus musculus OX=10090 GN=Wdr13 PE=1 SV=1	36.964	true	2	1	0	2.27	53663	25	1	1	1	1	1	1	1		1						1		0	0	0	0	0	0	0	1	0		39462.6						259328		12446.4	24490
451885	KEAP1_MOUSE	Keap1	KEAP1_MOUSE		sp|Q9Z2X8|KEAP1_MOUSE Kelch-like ECH-associated protein 1 OS=Mus musculus OX=10090 GN=Keap1 PE=1 SV=1	32.896	true	2	1	0	1.6	69552	40	1	1	1	1	1	1	1		1	1		1			1		0	0	0	0	0	0	0	1	0		39499	65656		108530			576545		12446.4	24512.7
451279	LONM_MOUSE	Lonp1	LONM_MOUSE		sp|Q8CGK3|LONM_MOUSE Lon protease homolog, mitochondrial OS=Mus musculus OX=10090 GN=Lonp1 PE=1 SV=2	45.519	true	2	1	0	1.05	105843	54	1	1	1	1	2	2	1			1	1	1				1	0	0	0	1	1	0	0	0	0			176062	55637.2	305087				58711.4	12446.4	12408.4
451213	SCMC1_MOUSE	Slc25a24	SCMC1_MOUSE		sp|Q8BMD8|SCMC1_MOUSE Calcium-binding mitochondrial carrier protein SCaMC-1 OS=Mus musculus OX=10090 GN=Slc25a24 PE=1 SV=1	47.899	true	2	1	0	3.37	52902	29	2	2	2	2	2	2	2	1	2	2	1	2	2		2	2	0	0	0	0	1	0	0	0	1	343618	459147	608813	241825	1.27924e+06	412127		1.1084e+06	280891	13621.7	259483
451760	XPO2_MOUSE	Cse1l	XPO2_MOUSE		sp|Q9ERK4|XPO2_MOUSE Exportin-2 OS=Mus musculus OX=10090 GN=Cse1l PE=1 SV=1	130.988	true	2	1	0	3.71	110455	56	4	4	4	4	7	7	4	1	2	4		4	3		4	1	0	0	0	0	3	0	0	4	0	71916.4	322826	599120		1.39985e+06	319488		4.18371e+06	227083	15262.9	46641.2
450756	AL1B1_MOUSE	Aldh1b1	AL1B1_MOUSE	AL1A3_MOUSE	sp|Q9CZS1|AL1B1_MOUSE Aldehyde dehydrogenase X, mitochondrial OS=Mus musculus OX=10090 GN=Aldh1b1 PE=1 SV=1	19.438	true	2	1	1	3.08	57553	29	2	1	2	1	3	1	1		1	1		1	1		1	1	0	0	0	0	1	0	0	0	0	55770.9	64699	430926	572587	3.96505e+06	2769992		3746522	439737	12446.4	40151.4
451686	PLBL2_MOUSE	Plbd2	PLBL2_MOUSE		sp|Q3TCN2|PLBL2_MOUSE Putative phospholipase B-like 2 OS=Mus musculus OX=10090 GN=Plbd2 PE=1 SV=2	27.237	true	2	1	0	1.52	66289	29	1	1	1	1	1	1	1		1	1		1	1	1	1	1	0	0	0	0	1	0	0	0	0		141090	68772.9		209615	70615.7	7740.35	305743	44970.7	12446.4	87559.1
452047	HIC2_MOUSE	Hic2	HIC2_MOUSE		sp|Q9JLZ6|HIC2_MOUSE Hypermethylated in cancer 2 protein OS=Mus musculus OX=10090 GN=Hic2 PE=2 SV=4	23.235	true	2	1	0	1.62	66766	30	1	1	1	1	1	1	1			1		1	1		1		0	0	0	0	1	0	0	0	0			135393		506853	321177		579611		12446.4	12408.4
451783	ARL8A_MOUSE	Arl8a	ARL8A_MOUSE		sp|Q8VEH3|ARL8A_MOUSE ADP-ribosylation factor-like protein 8A OS=Mus musculus OX=10090 GN=Arl8a PE=1 SV=1	42.554	true	2	1	0	9.68	21390	13	2	1	2	1	2	1	1	1							1		0	0	0	0	0	0	0	1	0	485946	279412	152651		518785	172065		5328765		256679	12408.4
451746	ZO2_MOUSE	Tjp2	ZO2_MOUSE		sp|Q9Z0U1|ZO2_MOUSE Tight junction protein ZO-2 OS=Mus musculus OX=10090 GN=Tjp2 PE=1 SV=2	31.587	true	2	1	0	0.77	131278	74	1	1	1	1	1	1	1	1		1		1			1		0	0	0	0	0	0	0	1	0	82295.5		30346.8		970371			842082		82295.5	12408.4
451323	CDC42_MOUSE	Cdc42	CDC42_MOUSE		sp|P60766|CDC42_MOUSE Cell division control protein 42 homolog OS=Mus musculus OX=10090 GN=Cdc42 PE=1 SV=2	100.157	true	2	1	0	15.18	21258	9	3	3	3	3	9	9	3	1	2	2	1	1	2	1	2	2	0	1	1	1	1	2	0	2	1	148055	1.69863e+06	702645	309020	3992966	790437	6061.4	1.43936e+06	774088	22871.3	748130
451947	FA83H_MOUSE	Fam83h	FA83H_MOUSE		sp|Q148V8|FA83H_MOUSE Protein FAM83H OS=Mus musculus OX=10090 GN=Fam83h PE=1 SV=1	25.903	true	2	1	0	0.58	131113	76	1	1	1	1	1	1	1		1	1					1	1	0	0	0	0	0	0	0	1	0		125177	64000.7					1.31735e+06	16675.7	12446.4	77683.2
451107	PEPL1_MOUSE	Npepl1	PEPL1_MOUSE		sp|Q6NSR8|PEPL1_MOUSE Probable aminopeptidase NPEPL1 OS=Mus musculus OX=10090 GN=Npepl1 PE=1 SV=1	22.032	true	2	1	0	2.29	55940	24	1	1	1	1	1	1	1		1	1		1	1	1	1	1	0	0	0	0	0	0	0	1	0		188086	72219.1		205944	92870.6	9162.61	272148	57242.3	12446.4	116724
451469	ANXA7_MOUSE	Anxa7	ANXA7_MOUSE		sp|Q07076|ANXA7_MOUSE Annexin A7 OS=Mus musculus OX=10090 GN=Anxa7 PE=1 SV=2	127.119	true	2	1	0	6.48	49925	24	3	3	3	3	6	6	3	1	3	2	1	2	2		3	2	0	1	0	0	2	1	0	2	0	603173	2300314	933018	541323	1.90323e+06	777853		7270590	638369	34884.4	971075
450863	CAZA2_MOUSE	Capza2	CAZA2_MOUSE		sp|P47754|CAZA2_MOUSE F-actin-capping protein subunit alpha-2 OS=Mus musculus OX=10090 GN=Capza2 PE=1 SV=3	96.645	true	2	1	0	10.49	32967	16	3	2	3	2	6	5	2	1	2	1	1	1	1		1	2	0	1	0	1	1	1	0	0	1	1.5002e+06	5.57453e+06	3.12139e+06	908266	3110586	803364		12281051	460066	52199.6	351996
450986	IF2G_MOUSE	Eif2s3x	IF2G_MOUSE	IF2H_MOUSE	sp|Q9Z0N1|IF2G_MOUSE Eukaryotic translation initiation factor 2 subunit 3, X-linked OS=Mus musculus OX=10090 GN=Eif2s3x PE=1 SV=2	120.375	true	2	1	1	7.42	51065	25	3	3	3	3	6	6	3	1	2	2		3	2		3	2	0	1	0	0	3	1	0	0	1	23330.5	1.25667e+06	969548		4.27147e+06	672779		9993149	824720	16368.6	908516
450794	GLMP_MOUSE	Glmp	GLMP_MOUSE		sp|Q9JHJ3|GLMP_MOUSE Glycosylated lysosomal membrane protein OS=Mus musculus OX=10090 GN=Glmp PE=1 SV=1	25.775	true	2	1	0	2.23	43804	13	1	1	1	1	1	1	1			1		1	1		1	1	0	0	0	0	1	0	0	0	0			65900.5		311244	176310		130307	27332.6	12446.4	12408.4
451936	ARBK1_MOUSE	Grk2	ARBK1_MOUSE		sp|Q99MK8|ARBK1_MOUSE Beta-adrenergic receptor kinase 1 OS=Mus musculus OX=10090 GN=Grk2 PE=1 SV=2	56.705	true	2	1	0	2.61	79639	46	2	2	2	2	2	2	2	2	2	1	1	2	1		2	1	0	1	0	0	1	0	0	0	0	168557	589886	270362	8603.54	1255082	162561		1.96259e+06	129176	80484	302095
451189	DNJB1_MOUSE	Dnajb1	DNJB1_MOUSE		sp|Q9QYJ3|DNJB1_MOUSE DnaJ homolog subfamily B member 1 OS=Mus musculus OX=10090 GN=Dnajb1 PE=1 SV=3	23.803	true	2	1	0	2.06	38167	21	1	1	1	1	1	1	1		1	1		1	1		1		0	0	0	0	0	0	0	1	0		84336.7	58141.4		165659	71241		976416		12446.4	52338.4
451972	PLCG2_MOUSE	Plcg2	PLCG2_MOUSE		sp|Q8CIH5|PLCG2_MOUSE 1-phosphatidylinositol 4,5-bisphosphate phosphodiesterase gamma-2 OS=Mus musculus OX=10090 GN=Plcg2 PE=1 SV=1	55.038	true	2	1	0	1.58	147592	77	2	2	2	2	2	2	2	1	2	2	1	2	2	1	2	1	0	0	1	0	1	0	0	0	0	91161.4	281031	263420	102019	786266	251693	21337.1	510096	143460	22713.5	186590
451074	SRP54_MOUSE	Srp54	SRP54_MOUSE		sp|P14576|SRP54_MOUSE Signal recognition particle 54 kDa protein OS=Mus musculus OX=10090 GN=Srp54 PE=1 SV=2	67.5	true	2	1	0	3.97	55721	36	2	2	2	2	3	3	2	2	2	1	1	2	1		1	2	0	1	0	0	1	0	0	1	0	415323	528911	280366	384812	1.3296e+06	328313		2555363	294849	127905	197607
450828	AP1M2_MOUSE	Ap1m2	AP1M2_MOUSE		sp|Q9WVP1|AP1M2_MOUSE AP-1 complex subunit mu-2 OS=Mus musculus OX=10090 GN=Ap1m2 PE=1 SV=3	41.989	true	2	1	0	3.78	48137	29	2	2	2	2	2	2	1	1	1			1			1		0	0	0	0	0	0	0	1	0	60093.7	41800.5			12346.3			1.14816e+06		60093.7	25940.9
450706	EI3JA_MOUSE	Eif3j1	EI3JA_MOUSE; EI3JB_MOUSE		sp|Q3UGC7|EI3JA_MOUSE Eukaryotic translation initiation factor 3 subunit J-A OS=Mus musculus OX=10090 GN=Eif3j1 PE=2 SV=1	22.634	true	2	2	0	3.07	29344	16	1	1	1	1	1	1	1		1	1	1		1		1	1	0	0	0	0	0	0	0	1	0		145875	110573	144923		149429		939639	43805.4	12446.4	90528
451932	COPD_MOUSE	Arcn1	COPD_MOUSE		sp|Q5XJY5|COPD_MOUSE Coatomer subunit delta OS=Mus musculus OX=10090 GN=Arcn1 PE=1 SV=2	93.8	true	2	1	0	6.07	57229	31	3	3	3	3	8	8	3	1	1	3	1	3	3		3	1	0	0	0	0	3	1	0	4	0	255414	194942	814187	93549.2	1.79331e+06	667694		4023559	33828.6	19004	7621.74
451194	HERC4_MOUSE	Herc4	HERC4_MOUSE		sp|Q6PAV2|HERC4_MOUSE Probable E3 ubiquitin-protein ligase HERC4 OS=Mus musculus OX=10090 GN=Herc4 PE=1 SV=2	32.084	true	2	1	0	1.14	118412	54	1	1	1	1	1	1	1		1			1			1		0	0	0	0	0	0	0	1	0		79841.5			150731			445813		12446.4	49548.7
451793	LSM6_MOUSE	Lsm6	LSM6_MOUSE		sp|P62313|LSM6_MOUSE U6 snRNA-associated Sm-like protein LSm6 OS=Mus musculus OX=10090 GN=Lsm6 PE=1 SV=1	35.019	true	2	1	0	10	9127	5	1	1	1	1	2	2	1		1	1	1	1	1		1	1	0	1	1	0	0	0	0	0	0		455146	311280	274319	846487	59978.7		1.65045e+06	213459	12446.4	282459
450661	ZFR_MOUSE	Zfr	ZFR_MOUSE		sp|O88532|ZFR_MOUSE Zinc finger RNA-binding protein OS=Mus musculus OX=10090 GN=Zfr PE=1 SV=2	15.122	true	2	1	0	0.65	116859	51	1	1	1	1	1	1	1	1	1	1	1	1	1	1	1	1	0	0	0	1	0	0	0	0	0	145971	39092.7	32515.1	209872	236702	253627	4747.6	296678	100569	145971	24260.5
451800	HPCA_MOUSE	Hpca	HPCA_MOUSE; NCALD_MOUSE		sp|P84075|HPCA_MOUSE Neuron-specific calcium-binding protein hippocalcin OS=Mus musculus OX=10090 GN=Hpca PE=1 SV=2	22.137	true	2	2	0	4.15	22427	15	1	1	1	1	1	1	1			1					1		0	0	0	0	0	0	0	1	0			58295.3					216809		12446.4	12408.4
452008	PTBP2_MOUSE	Ptbp2	PTBP2_MOUSE		sp|Q91Z31|PTBP2_MOUSE Polypyrimidine tract-binding protein 2 OS=Mus musculus OX=10090 GN=Ptbp2 PE=1 SV=2	25.091	true	2	1	0	1.51	57489	22	1	1	1	1	4	4	1	1	1	1		1	1		1	1	0	0	0	0	1	1	0	1	1	18429.8	1.2603e+06	1.56838e+06		4.39488e+06	1.531e+06		4303453	1.66013e+06	18429.8	782128
451028	NEP1_MOUSE	Emg1	NEP1_MOUSE		sp|O35130|NEP1_MOUSE Ribosomal RNA small subunit methyltransferase NEP1 OS=Mus musculus OX=10090 GN=Emg1 PE=1 SV=1	30.716	true	2	1	0	3.28	26974	17	1	1	1	1	1	1	1	1		1	1	1	1		1	1	0	0	0	0	0	0	0	0	1	90986		85062.6	89199.8	347758	177052		296977	100336	90986	12408.4
451819	MK14_MOUSE	Mapk14	MK14_MOUSE		sp|P47811|MK14_MOUSE Mitogen-activated protein kinase 14 OS=Mus musculus OX=10090 GN=Mapk14 PE=1 SV=3	25.128	true	2	1	0	3.61	41287	18	1	1	1	1	1	1	1			1		1	1		1		0	0	0	0	1	0	0	0	0			286433		808320	238748		1.03868e+06		12446.4	12408.4
450509	RAB8B_MOUSE	Rab8b	RAB8B_MOUSE	RAB12_MOUSE; RAB13_MOUSE; RAB26_MOUSE; RAB30_MOUSE; RAB37_MOUSE; RAB3A_MOUSE; RAB3B_MOUSE; RAB3C_MOUSE; RAB3D_MOUSE; RAB43_MOUSE; RB39B_MOUSE	sp|P61028|RAB8B_MOUSE Ras-related protein Rab-8B OS=Mus musculus OX=10090 GN=Rab8b PE=1 SV=1	173.541	true	2	1	11	27.05	23603	16	6	3	6	3	12	6	3	1	3	1	1	3	2		2	1	0	0	1	1	3	0	0	1	0	5213266	5.06315e+06	6956566	1.152e+06	16119689	5386351	7378.14	51386680	633264	18516.1	1.3035e+06
451549	EIF3I_MOUSE	Eif3i	EIF3I_MOUSE		sp|Q9QZD9|EIF3I_MOUSE Eukaryotic translation initiation factor 3 subunit I OS=Mus musculus OX=10090 GN=Eif3i PE=1 SV=1	139.194	true	2	1	0	14.15	36461	22	4	4	4	4	6	6	4	2	2	2	3	3	2		4	2	0	0	0	1	2	0	0	3	0	649453	488625	472315	767864	1789888	360909		6589475	270018	260535	160260
451169	GARS_MOUSE	Gars1	GARS_MOUSE		sp|Q9CZD3|GARS_MOUSE Glycine--tRNA ligase OS=Mus musculus OX=10090 GN=Gars1 PE=1 SV=1	178.171	true	2	1	0	6.17	81878	51	6	6	6	6	7	7	6	4	2	4	4	4	4	2	6	3	0	1	0	0	1	0	0	5	0	1.02641e+06	331374	792624	1.27855e+06	4.25035e+06	570223	2.04514e+06	4.14895e+06	192716	2.4984e+06	299962
451075	UBC12_MOUSE	Ube2m	UBC12_MOUSE		sp|P61082|UBC12_MOUSE NEDD8-conjugating enzyme Ubc12 OS=Mus musculus OX=10090 GN=Ube2m PE=1 SV=1	99.658	true	2	1	0	16.39	20899	12	3	3	3	3	3	3	3	2	1	3	1	3	3		2	2	0	0	0	0	2	0	0	1	0	122216	198574	800082	72690.4	1.45463e+06	443828		2561244	101492	59945.3	14707.7
451872	ODPA_MOUSE	Pdha1	ODPA_MOUSE		sp|P35486|ODPA_MOUSE Pyruvate dehydrogenase E1 component subunit alpha, somatic form, mitochondrial OS=Mus musculus OX=10090 GN=Pdha1 PE=1 SV=1	43.953	true	2	1	0	3.33	43232	25	1	1	1	1	1	1	1			1		1	1		1		0	0	0	0	0	0	0	1	0			292729		420835	272738		1.03124e+06		12446.4	12408.4
450910	MACF1_MOUSE	Macf1	MACF1_MOUSE		sp|Q9QXZ0|MACF1_MOUSE Microtubule-actin cross-linking factor 1 OS=Mus musculus OX=10090 GN=Macf1 PE=1 SV=2	110.635	true	2	1	0	0.52	831878	474	4	4	4	4	4	4	3	2	2	2	1	3	1		3	2	0	0	0	0	0	0	0	3	0	212678	106768	102969	31389.6	595265	50862.4		2.51578e+06	56658.1	145012	54721.6
451142	IDH3A_MOUSE	Idh3a	IDH3A_MOUSE		sp|Q9D6R2|IDH3A_MOUSE Isocitrate dehydrogenase [NAD] subunit alpha, mitochondrial OS=Mus musculus OX=10090 GN=Idh3a PE=1 SV=1	27.753	true	2	1	0	3.01	39639	22	1	1	1	1	1	1	1	1	1		1	1			1	1	0	1	0	0	0	0	0	0	0	164581	536962		170799	1367012			1567628	303288	164581	333232
451332	LMAN1_MOUSE	Lman1	LMAN1_MOUSE		sp|Q9D0F3|LMAN1_MOUSE Protein ERGIC-53 OS=Mus musculus OX=10090 GN=Lman1 PE=1 SV=1	23.411	true	2	1	0	1.55	57789	24	1	1	1	1	1	1	1	1	1			1	1	1	1	1	0	0	0	0	1	0	0	0	0	3311.81	109177			485699	105706	4573.73	42958.1	37752.9	3311.81	67753.7
451338	DNJC7_MOUSE	Dnajc7	DNJC7_MOUSE		sp|Q9QYI3|DNJC7_MOUSE DnaJ homolog subfamily C member 7 OS=Mus musculus OX=10090 GN=Dnajc7 PE=1 SV=2	48.871	true	2	1	0	2.23	56476	36	1	1	1	1	1	1	1		1		1	1	1		1	1	0	0	0	0	1	0	0	0	0		183057		51155	391783	81977.5		149699	81198.7	12446.4	113603
450578	PSD12_MOUSE	Psmd12	PSD12_MOUSE		sp|Q9D8W5|PSD12_MOUSE 26S proteasome non-ATPase regulatory subunit 12 OS=Mus musculus OX=10090 GN=Psmd12 PE=1 SV=4	48.129	true	2	1	0	4.61	52895	34	2	2	2	2	2	2	2	2	1	2	2	2	1		2	1	0	0	0	0	1	0	0	1	0	133331	158097	564174	96695.8	897163	173313		1.30149e+06	128836	85253.5	17991.2
451510	SC22B_MOUSE	Sec22b	SC22B_MOUSE		sp|O08547|SC22B_MOUSE Vesicle-trafficking protein SEC22b OS=Mus musculus OX=10090 GN=Sec22b PE=1 SV=3	33.014	true	2	1	0	4.65	24741	14	1	1	1	1	1	1	1	1	1			1	1		1		0	0	0	0	0	0	0	1	0	202832	81005			2.00382e+06	490757		6409885		202832	50270.8
450786	RADI_MOUSE	Rdx	RADI_MOUSE		sp|P26043|RADI_MOUSE Radixin OS=Mus musculus OX=10090 GN=Rdx PE=1 SV=3	195.226	true	2	1	0	6.52	68543	37	5	1	5	1	13	3	1		1	1	1	1	1		1	1	0	0	0	0	1	1	0	1	0	3.23023e+06	4.74864e+06	7048497	3.41618e+06	14111021	7252084	522906	20390204	3114197	12446.4	107911
451130	ECHB_MOUSE	Hadhb	ECHB_MOUSE		sp|Q99JY0|ECHB_MOUSE Trifunctional enzyme subunit beta, mitochondrial OS=Mus musculus OX=10090 GN=Hadhb PE=1 SV=1	69.479	true	2	1	0	5.89	51386	28	3	3	3	3	3	3	3		2	3	1	3	1	1	3	2	0	0	0	0	2	0	0	1	0		459133	772209	70881.2	1773908	161490	4387.24	2.42917e+06	119644	12446.4	331035
450681	ARF1_MOUSE	Arf1	ARF1_MOUSE; ARF2_MOUSE; ARF3_MOUSE	ARF5_MOUSE	sp|P84078|ARF1_MOUSE ADP-ribosylation factor 1 OS=Mus musculus OX=10090 GN=Arf1 PE=1 SV=2	126.608	true	2	3	1	10.5	20696	11	2	1	3	1	6	1	1	1	1	1	1	1	1		1	1	0	0	0	0	0	0	0	1	0	947806	783958	1.28991e+06	221166	1.62974e+06	1.24889e+06		9957328	28702.1	69927.4	72612.2
452099	SIA8D_MOUSE	St8sia4	SIA8D_MOUSE		sp|Q64692|SIA8D_MOUSE CMP-N-acetylneuraminate-poly-alpha-2,8-sialyltransferase OS=Mus musculus OX=10090 GN=St8sia4 PE=2 SV=1	24.547	true	2	1	0	2.79	41256	25	1	1	1	1	1	1	1	1				1	1		1		0	0	0	0	0	1	0	0	0	132910				1114615	1.12986e+06		1.01073e+06		132910	12408.4
451736	RPF2_MOUSE	Rpf2	RPF2_MOUSE		sp|Q9JJ80|RPF2_MOUSE Ribosome production factor 2 homolog OS=Mus musculus OX=10090 GN=Rpf2 PE=2 SV=2	50.369	true	2	1	0	6.86	35363	19	2	2	2	2	2	2	2			2		2	2		2		0	0	0	0	2	0	0	0	0			201400		805239	500478		737385		12446.4	12408.4
452029	VPS52_MOUSE	Vps52	VPS52_MOUSE		sp|Q8C754|VPS52_MOUSE Vacuolar protein sorting-associated protein 52 homolog OS=Mus musculus OX=10090 GN=Vps52 PE=1 SV=1	25.128	true	2	1	0	1.11	82044	44	1	1	1	1	1	1	1	1	1	1	1	1	1		1	1	0	0	0	0	0	0	0	1	0	13597	55918	45072	28844.1	104004	42384.8		425373	13663	13597	34702.1
451293	TRAM1_MOUSE	Tram1	TRAM1_MOUSE		sp|Q91V04|TRAM1_MOUSE Translocating chain-associated membrane protein 1 OS=Mus musculus OX=10090 GN=Tram1 PE=1 SV=3	26.156	true	2	1	0	2.14	43039	13	1	1	1	1	2	2	1		1	1		1	1		1	1	0	0	0	0	1	0	0	1	0		76940.8	232956		676774	180927		294896	127134	12446.4	47748.6
451359	CCR2_MOUSE	Ccr2	CCR2_MOUSE		sp|P51683|CCR2_MOUSE C-C chemokine receptor type 2 OS=Mus musculus OX=10090 GN=Ccr2 PE=1 SV=2	23.375	true	2	1	0	1.88	42782	12	1	1	1	1	1	1	1		1	1	1	1	1		1	1	0	0	0	0	0	1	0	0	0		487878	51090	216330	2.124e+06	1.05799e+06		456925	113165	12446.4	302771
451262	BAP31_MOUSE	Bcap31	BAP31_MOUSE		sp|Q61335|BAP31_MOUSE B-cell receptor-associated protein 31 OS=Mus musculus OX=10090 GN=Bcap31 PE=1 SV=4	83.948	true	2	1	0	10.61	27957	15	3	3	3	3	5	5	3	2	1	2	1	3	2	1	2	2	0	0	1	0	2	0	0	2	0	196577	317168	211261	86416.2	1.76304e+06	177780	11981	1.21075e+06	21369.1	160023	69310.1
451571	PHF5A_MOUSE	Phf5a	PHF5A_MOUSE		sp|P83870|PHF5A_MOUSE PHD finger-like domain-containing protein 5A OS=Mus musculus OX=10090 GN=Phf5a PE=1 SV=1	15.207	true	2	1	0	7.27	12405	9	1	1	1	1	1	1	1	1	1	1		1	1		1	1	0	0	1	0	0	0	0	0	0	15525.9	298196	378122		1.1867e+06	527700		1.15391e+06	250742	15525.9	185057
450674	CSN1_MOUSE	Gps1	CSN1_MOUSE		sp|Q99LD4|CSN1_MOUSE COP9 signalosome complex subunit 1 OS=Mus musculus OX=10090 GN=Gps1 PE=1 SV=1	26.347	true	2	1	0	2.34	53442	26	1	1	1	1	1	1	1			1		1	1		1		0	0	0	0	0	0	0	1	0			158538		268162	146452		491759		12446.4	12408.4
451795	PRS4_MOUSE	Psmc1	PRS4_MOUSE		sp|P62192|PRS4_MOUSE 26S proteasome regulatory subunit 4 OS=Mus musculus OX=10090 GN=Psmc1 PE=1 SV=1	51.526	true	2	1	0	4.77	49184	27	2	2	2	2	3	3	2	1	2	2	1	1	2		2	2	0	1	0	0	1	0	0	1	0	657839	1.76673e+06	1.63113e+06	268615	2.91884e+06	1.23184e+06		14942634	154251	26098.2	786219
452111	ERG28_MOUSE	Erg28	ERG28_MOUSE		sp|Q9ERY9|ERG28_MOUSE Ergosterol biosynthetic protein 28 homolog OS=Mus musculus OX=10090 GN=Erg28 PE=2 SV=1	23.409	true	2	1	0	5.71	15805	7	1	1	1	1	1	1	1		1	1	1	1	1		1	1	0	0	0	0	0	0	0	1	0		185100	52101.6	28162.4	106747	43445.4		718748	27238.4	12446.4	114871
452039	SYIM_MOUSE	Iars2	SYIM_MOUSE		sp|Q8BIJ6|SYIM_MOUSE Isoleucine--tRNA ligase, mitochondrial OS=Mus musculus OX=10090 GN=Iars2 PE=1 SV=1	22.616	true	2	1	0	1.68	112804	48	1	1	1	1	1	1	1			1		1			1		0	0	0	0	0	0	0	1	0			91628.6		62571.4			281577		12446.4	12408.4
451170	RS23_MOUSE	Rps23	RS23_MOUSE		sp|P62267|RS23_MOUSE 40S ribosomal protein S23 OS=Mus musculus OX=10090 GN=Rps23 PE=1 SV=3	90.779	true	2	1	0	16.08	15807	8	3	3	3	3	5	5	3		1	2		2	1		3	1	0	0	1	0	1	0	0	2	1		649122	1.55003e+06		2.19873e+06	502517		1.05974e+06	522233	12446.4	114996
451029	CUL3_MOUSE	Cul3	CUL3_MOUSE	PRDM1_MOUSE	sp|Q9JLV5|CUL3_MOUSE Cullin-3 OS=Mus musculus OX=10090 GN=Cul3 PE=1 SV=1	34.98	true	2	1	1	2.47	88948	51	2	2	2	2	4	4	2	2	2	1	1	1	1		2	1	0	0	0	0	1	0	0	2	1	507399	247510	130940	18820.8	341809	175399		2.86476e+06	92471.9	188757	109423
451292	TRFL_MOUSE	Ltf	TRFL_MOUSE		sp|P08071|TRFL_MOUSE Lactotransferrin OS=Mus musculus OX=10090 GN=Ltf PE=1 SV=4	109.613	true	2	1	0	4.1	77838	50	3	3	3	3	5	5	3		2	2		2	1		2		0	2	1	0	1	0	0	1	0		781855	1.32122e+06		881500	336285		3.40703e+06		12446.4	11755.2
451989	VATG1_MOUSE	Atp6v1g1	VATG1_MOUSE		sp|Q9CR51|VATG1_MOUSE V-type proton ATPase subunit G 1 OS=Mus musculus OX=10090 GN=Atp6v1g1 PE=1 SV=3	55.187	true	2	1	0	9.32	13724	6	1	1	1	1	5	5	1		1			1			1	1	0	1	0	0	1	0	0	2	0		510082			862839			3305341	8980.61	12446.4	316551
450812	MYO1E_MOUSE	Myo1e	MYO1E_MOUSE		sp|E9Q634|MYO1E_MOUSE Unconventional myosin-Ie OS=Mus musculus OX=10090 GN=Myo1e PE=1 SV=1	152.308	true	2	1	0	4.88	126818	67	5	2	5	2	7	3	2	2		1	2	1	1		2	1	0	0	0	0	1	0	0	2	0	913469	471471	1.4028e+06	833787	2.73452e+06	1.48684e+06		3.26203e+06	160503	620445	12408.4
451814	BZW2_MOUSE	Bzw2	BZW2_MOUSE; BZW2_MUSMM		sp|Q91VK1|BZW2_MOUSE Basic leucine zipper and W2 domain-containing protein 2 OS=Mus musculus OX=10090 GN=Bzw2 PE=1 SV=1	84.7	true	2	2	0	5.01	48063	31	2	2	2	2	2	2	2	1	2	2	1	1	2		2	1	0	0	0	0	0	0	0	2	0	107711	458176	404496	322050	1.81782e+06	388476		2120392	84301.7	18589.2	249246
451600	WDR43_MOUSE	Wdr43	WDR43_MOUSE		sp|Q6ZQL4|WDR43_MOUSE WD repeat-containing protein 43 OS=Mus musculus OX=10090 GN=Wdr43 PE=1 SV=2	64.928	true	2	1	0	1.62	75381	42	1	1	1	1	1	1	1	1		1	1	1	1		1	1	1	0	0	0	0	0	0	0	0	336312		54017.9	338055	59288.5	45900.5		403754	140909	336312	12408.4
451376	SDHA_MOUSE	Sdha	SDHA_MOUSE		sp|Q8K2B3|SDHA_MOUSE Succinate dehydrogenase [ubiquinone] flavoprotein subunit, mitochondrial OS=Mus musculus OX=10090 GN=Sdha PE=1 SV=1	56.181	true	2	1	0	3.61	72585	37	2	2	2	2	2	2	2		1	2		1	2		2		0	0	1	0	1	0	0	0	0		266489	699550		796950	533453		906431		12446.4	10851.3
451046	IF4B_MOUSE	Eif4b	IF4B_MOUSE		sp|Q8BGD9|IF4B_MOUSE Eukaryotic translation initiation factor 4B OS=Mus musculus OX=10090 GN=Eif4b PE=1 SV=1	15.915	true	2	1	0	1.15	68840	35	1	1	1	1	1	1	1		1	1		1	1	1	1	1	0	0	0	0	1	0	0	0	0		58807.2	129470		520655	158263	4780.47	603644	19624.2	12446.4	36495.1
450902	RLA2_MOUSE	Rplp2	RLA2_MOUSE		sp|P99027|RLA2_MOUSE 60S acidic ribosomal protein P2 OS=Mus musculus OX=10090 GN=Rplp2 PE=1 SV=3	137.738	true	2	1	0	38.26	11651	5	3	3	3	3	6	6	3	1	1	3		2	1		3		0	0	1	0	2	0	0	3	0	451311	654755	1.02066e+06		2.6963e+06	502748		7809086		33603.4	25437.5
451605	TM165_MOUSE	Tmem165	TM165_MOUSE		sp|P52875|TM165_MOUSE Transmembrane protein 165 OS=Mus musculus OX=10090 GN=Tmem165 PE=1 SV=2	30.116	true	2	1	0	3.41	34791	16	1	1	1	1	1	1	1		1			1			1		0	0	0	0	0	0	0	1	0		251083			372455			1.05695e+06		12446.4	155819
451911	MCM2_MOUSE	Mcm2	MCM2_MOUSE		sp|P97310|MCM2_MOUSE DNA replication licensing factor MCM2 OS=Mus musculus OX=10090 GN=Mcm2 PE=1 SV=3	109.6	true	2	1	0	2.77	102078	51	2	2	2	2	2	2	2	1	1	2		2	1		2		0	0	1	0	1	0	0	0	0	111570	200541	477920		1.04275e+06	167569		651393		12168	9737.4
451706	SRRT_MOUSE	Srrt	SRRT_MOUSE		sp|Q99MR6|SRRT_MOUSE Serrate RNA effector molecule homolog OS=Mus musculus OX=10090 GN=Srrt PE=1 SV=1	24.05	true	2	1	0	0.91	100452	52	1	1	1	1	1	1	1			1		1	1		1		0	0	0	0	0	0	0	1	0			167549		326056	91713.8		473056		12446.4	12408.4
451437	RL38_MOUSE	Rpl38	RL38_MOUSE		sp|Q9JJI8|RL38_MOUSE 60S ribosomal protein L38 OS=Mus musculus OX=10090 GN=Rpl38 PE=1 SV=3	40.175	true	2	1	0	14.29	8204	3	1	1	1	1	1	1	1			1		1	1		1		0	0	0	0	0	1	0	0	0			329245		309647	402369		926015		12446.4	12408.4
451452	CO1A1_MOUSE	Col1a1	CO1A1_MOUSE		sp|P11087|CO1A1_MOUSE Collagen alpha-1(I) chain OS=Mus musculus OX=10090 GN=Col1a1 PE=1 SV=4	110.048	true	2	1	0	3.51	138032	88	4	4	4	4	7	7	4	1	3	3	1	2	1	1	2	4	0	0	0	0	0	0	0	0	7	1.73394e+06	4.09001e+06	1.67124e+06	1115100	1.40534e+06	1.33382e+06	3353.05	2.40121e+06	14637734	85094.2	1462343
450623	PADI2_MOUSE	Padi2	PADI2_MOUSE		sp|Q08642|PADI2_MOUSE Protein-arginine deiminase type-2 OS=Mus musculus OX=10090 GN=Padi2 PE=1 SV=2	31.428	true	2	1	0	2.38	76248	40	1	1	1	1	1	1	1			1		1					0	0	0	0	1	0	0	0	0			62572.3		188135					12446.4	12408.4
452007	SPB5_MOUSE	Serpinb5	SPB5_MOUSE		sp|P70124|SPB5_MOUSE Serpin B5 OS=Mus musculus OX=10090 GN=Serpinb5 PE=1 SV=1	189.407	true	2	1	0	10.13	42110	22	4	4	4	4	7	7	4	2	4	4	2	4	2	1	4	2	0	0	0	1	0	0	1	5	0	637117	559634	539233	879169	570669	233181	123343	49417256	77431.6	168717	578399
452125	EF1B_MOUSE	Eef1b	EF1B_MOUSE		sp|O70251|EF1B_MOUSE Elongation factor 1-beta OS=Mus musculus OX=10090 GN=Eef1b PE=1 SV=5	57.636	true	2	1	0	7.11	24694	15	2	2	2	2	3	3	2		2	1	1	1	1		1	1	0	2	0	0	0	0	0	0	1		2.63038e+06	1413289	563375	2375843	462854		13996497	110895	12446.4	2.07221e+06
450656	HNRLL_MOUSE	Hnrnpll	HNRLL_MOUSE		sp|Q921F4|HNRLL_MOUSE Heterogeneous nuclear ribonucleoprotein L-like OS=Mus musculus OX=10090 GN=Hnrnpll PE=1 SV=3	25.812	true	2	1	0	2.54	64125	30	1	1	1	1	1	1	1			1		1					0	0	0	0	1	0	0	0	0			63503.3		144657					12446.4	12408.4
451703	PA2G4_MOUSE	Pa2g4	PA2G4_MOUSE		sp|P50580|PA2G4_MOUSE Proliferation-associated protein 2G4 OS=Mus musculus OX=10090 GN=Pa2g4 PE=1 SV=3	331.056	true	2	1	0	26.65	43699	24	9	9	10	10	12	12	9	3	6	7	4	7	5	2	9	6	0	3	0	0	2	1	0	5	0	868651	4919136	4.99734e+06	678987	13177597	3006479	33346.8	27031876	1.18076e+06	154289	2.29926e+06
451007	VA0D1_MOUSE	Atp6v0d1	VA0D1_MOUSE		sp|P51863|VA0D1_MOUSE V-type proton ATPase subunit d 1 OS=Mus musculus OX=10090 GN=Atp6v0d1 PE=1 SV=2	36.772	true	2	1	0	2.28	40301	17	1	1	1	1	1	1	1		1	1		1	1		1		0	0	0	0	0	0	0	1	0		216378	48594		119159	65441.7		1.43554e+06		12446.4	134282
450499	CTCFL_MOUSE	Ctcfl	CTCFL_MOUSE; CTCF_MOUSE		sp|A2APF3|CTCFL_MOUSE Transcriptional repressor CTCFL OS=Mus musculus OX=10090 GN=Ctcfl PE=1 SV=1	26.975	true	2	2	0	1.26	73107	38	1	1	1	1	1	1	1					1			1	1	0	0	0	0	1	0	0	0	0					384454			39389.3	26753.4	12446.4	12408.4
451582	RB27A_MOUSE	Rab27a	RB27A_MOUSE		sp|Q9ERI2|RB27A_MOUSE Ras-related protein Rab-27A OS=Mus musculus OX=10090 GN=Rab27a PE=1 SV=1	58.052	true	2	1	0	8.14	25017	13	2	2	2	2	2	2	2	1	1	2		1	2		1	1	0	0	0	0	1	0	0	0	1	259094	610339	839333		1.88807e+06	751704		1.61086e+06	181506	38149.9	42585.9
451477	PDCD4_MOUSE	Pdcd4	PDCD4_MOUSE		sp|Q61823|PDCD4_MOUSE Programmed cell death protein 4 OS=Mus musculus OX=10090 GN=Pdcd4 PE=1 SV=1	21.734	true	2	1	0	1.92	51701	25	1	1	1	1	1	1	1	1	1	1	1	1		1	1	1	0	1	0	0	0	0	0	0	0	6227.39	235224	18831	5318.01	53334.7		3117.61	92348.4	52803.7	6227.39	145977
451958	UBP15_MOUSE	Usp15	UBP15_MOUSE		sp|Q8R5H1|UBP15_MOUSE Ubiquitin carboxyl-terminal hydrolase 15 OS=Mus musculus OX=10090 GN=Usp15 PE=1 SV=1	62.492	true	2	1	0	1.73	112325	57	2	2	2	2	2	2	2	1	1	2		2	2		2	1	0	0	0	0	1	0	0	1	0	75400.2	88217	150049		318746	135623		2766355	13036.1	33326.6	22640.2
451790	TIPRL_MOUSE	Tiprl	TIPRL_MOUSE		sp|Q8BH58|TIPRL_MOUSE TIP41-like protein OS=Mus musculus OX=10090 GN=Tiprl PE=1 SV=1	22.239	true	2	1	0	4.43	31254	18	1	1	1	1	1	1	1		1	1	1	1	1		1	1	0	0	0	0	1	0	0	0	0		252682	1.06014e+06	38864.5	343267	19217.7		1.0252e+06	466471	12446.4	156812
451786	IF6_MOUSE	Eif6	IF6_MOUSE		sp|O55135|IF6_MOUSE Eukaryotic translation initiation factor 6 OS=Mus musculus OX=10090 GN=Eif6 PE=1 SV=2	77.828	true	2	1	0	11.84	26511	10	2	2	2	2	3	3	2	1	1	2		2	2		2		0	0	1	0	0	0	0	2	0	701139	119284	447982		666858	595412		8171001		50411	16670.3
451994	SAE1_MOUSE	Sae1	SAE1_MOUSE		sp|Q9R1T2|SAE1_MOUSE SUMO-activating enzyme subunit 1 OS=Mus musculus OX=10090 GN=Sae1 PE=1 SV=1	56.295	true	2	1	0	8.57	38620	24	2	2	2	2	2	2	2	1	1	1		2	1		2	1	0	0	0	0	0	0	0	2	0	180540	57110.7	40755.7		219538	46955.6		362784	44169.4	111498	29166.6
451286	CKAP5_MOUSE	Ckap5	CKAP5_MOUSE		sp|A2AGT5|CKAP5_MOUSE Cytoskeleton-associated protein 5 OS=Mus musculus OX=10090 GN=Ckap5 PE=1 SV=1	32.685	true	2	1	0	0.59	225635	121	1	1	1	1	1	1	1		1		1	1			1		0	0	0	0	0	0	0	1	0		74400.3		90716.2	196478			291744		12446.4	46172
450850	MTAP2_MOUSE	Map2	MTAP2_MOUSE		sp|P20357|MTAP2_MOUSE Microtubule-associated protein 2 OS=Mus musculus OX=10090 GN=Map2 PE=1 SV=2	20.29	true	2	1	0	0.44	199132	100	1	1	1	1	1	1	1		1			1	1		1	1	0	0	0	0	0	0	0	1	0		102062			14000.9	32288.8		474184	11090.6	12446.4	63338.4
452152	OTU1_MOUSE	Yod1	OTU1_MOUSE		sp|Q8CB27|OTU1_MOUSE Ubiquitin thioesterase OTU1 OS=Mus musculus OX=10090 GN=Yod1 PE=1 SV=1	40.166	true	2	1	0	2.62	37485	21	1	1	1	1	2	2	1		1	1		1	1		1	1	0	0	1	0	0	0	0	1	0		873821	143653		177193	150746		3.4703e+06	63121	12446.4	542283
451361	TWF2_MOUSE	Twf2	TWF2_MOUSE		sp|Q9Z0P5|TWF2_MOUSE Twinfilin-2 OS=Mus musculus OX=10090 GN=Twf2 PE=1 SV=1	26.6	true	2	1	0	5.44	39471	22	1	1	1	1	2	2	1	1		1		1	1		1	1	0	0	1	0	0	0	0	0	1	205581		371144		821493	206276		629019	338056	205581	12408.4
452086	G6PI_MOUSE	Gpi	G6PI_MOUSE		sp|P06745|G6PI_MOUSE Glucose-6-phosphate isomerase OS=Mus musculus OX=10090 GN=Gpi PE=1 SV=4	171.696	true	2	1	0	8.24	62767	33	5	5	5	5	13	13	5	3	2	5	3	3	5	1	4	4	1	2	3	0	3	1	0	3	0	481870	1.71301e+06	2.05839e+06	337053	4.43973e+06	1.44182e+06	4182.22	6.68411e+06	885155	238820	40474.9
450601	COPG1_MOUSE	Copg1	COPG1_MOUSE		sp|Q9QZE5|COPG1_MOUSE Coatomer subunit gamma-1 OS=Mus musculus OX=10090 GN=Copg1 PE=1 SV=1	96.23	true	2	1	0	3.43	97513	48	3	3	3	3	3	3	3	1	3	3	1	3	3	1	3	1	0	0	0	0	0	0	0	3	0	65565.1	438351	446268	6831.99	1.32551e+06	724485	112145	2.80673e+06	329229	18394.9	504267
450781	PININ_MOUSE	Pnn	PININ_MOUSE		sp|O35691|PININ_MOUSE Pinin OS=Mus musculus OX=10090 GN=Pnn PE=1 SV=4	21.678	true	2	1	0	1.24	82436	42	1	1	1	1	2	2	1		1	1		1	1		1	1	0	0	1	0	0	1	0	0	0		227488	311063		515758	446034		676010	179735	12446.4	141177
451226	AT131_MOUSE	Atp13a1	AT131_MOUSE		sp|Q9EPE9|AT131_MOUSE Manganese-transporting ATPase 13A1 OS=Mus musculus OX=10090 GN=Atp13a1 PE=1 SV=2	103.184	true	2	1	0	2.42	132388	61	3	3	3	3	3	3	2	1	1	2	1	2	1		2	1	0	0	0	0	0	0	0	2	0	303351	109370	224350	315319	525083	58583.3		834936	57004.3	66425.2	21829.8
451445	MYO6_MOUSE	Myo6	MYO6_MOUSE		sp|Q64331|MYO6_MOUSE Unconventional myosin-VI OS=Mus musculus OX=10090 GN=Myo6 PE=1 SV=1	22.672	true	2	1	0	0.71	146407	77	1	1	1	1	1	1	1		1	1		1	1		1		0	0	0	0	0	0	0	1	0		95793.7	81278.7		193747	28799.2		1.00295e+06		12446.4	59448.5
451267	CD44_MOUSE	Cd44	CD44_MOUSE		sp|P15379|CD44_MOUSE CD44 antigen OS=Mus musculus OX=10090 GN=Cd44 PE=1 SV=3	23.281	true	2	1	0	1.54	85617	24	1	1	1	1	1	1	1		1						1	1	0	0	0	0	0	0	0	0	1		11187944						1.56722e+06	355301	12446.4	6943109
452032	RFA2_MOUSE	Rpa2	RFA2_MOUSE		sp|Q62193|RFA2_MOUSE Replication protein A 32 kDa subunit OS=Mus musculus OX=10090 GN=Rpa2 PE=1 SV=1	22.756	true	2	1	0	2.96	29718	16	1	1	1	1	1	1	1	1		1		1	1		1	1	0	0	0	0	0	0	0	1	0	215416		252642		760198	42353.5		986891	148582	215416	12408.4
450985	HXK1_MOUSE	Hk1	HXK1_MOUSE		sp|P17710|HXK1_MOUSE Hexokinase-1 OS=Mus musculus OX=10090 GN=Hk1 PE=1 SV=3	223.061	true	2	1	0	7.19	108303	57	7	5	8	5	8	5	5	2	3	5	1	5	3	1	5	2	0	0	1	0	0	0	0	4	0	514733	555372	1.34277e+06	155182	1.88969e+06	462203	11147.1	10911227	276415	43209.7	395791
451829	RIR1_MOUSE	Rrm1	RIR1_MOUSE		sp|P07742|RIR1_MOUSE Ribonucleoside-diphosphate reductase large subunit OS=Mus musculus OX=10090 GN=Rrm1 PE=1 SV=2	82.87	true	2	1	0	3.66	90210	44	3	3	3	3	4	4	2	1	2	2	1	2	2		2	1	0	0	0	0	1	1	0	1	0	329992	972468	787151	265490	2805231	791894		2.34657e+06	328874	16322.2	519712
451345	NCEH1_MOUSE	Nceh1	NCEH1_MOUSE		sp|Q8BLF1|NCEH1_MOUSE Neutral cholesterol ester hydrolase 1 OS=Mus musculus OX=10090 GN=Nceh1 PE=1 SV=1	52.138	true	2	1	0	2.94	45740	20	1	1	1	1	1	1	1			1		1	1		1		0	0	0	0	0	0	0	1	0			104181		376291	112033		262983		12446.4	12408.4
451109	PIPNA_MOUSE	Pitpna	PIPNA_MOUSE		sp|P53810|PIPNA_MOUSE Phosphatidylinositol transfer protein alpha isoform OS=Mus musculus OX=10090 GN=Pitpna PE=1 SV=2	41.835	true	2	1	0	7.38	31893	26	2	2	2	2	2	2	1	1	1	1	1	1	1		1	1	0	0	0	0	0	0	0	1	0	106359	193375	176696	65052.9	375045	224974		1.20151e+06	403154	106359	120006
450679	RL1D1_MOUSE	Rsl1d1	RL1D1_MOUSE		sp|Q8BVY0|RL1D1_MOUSE Ribosomal L1 domain-containing protein 1 OS=Mus musculus OX=10090 GN=Rsl1d1 PE=1 SV=1	101.068	true	2	1	0	8.85	50421	21	3	3	3	3	8	8	3	1	2	1	1	2	1		1	2	1	2	0	0	3	0	0	0	2	379679	1.46311e+06	737775	18083.8	4432014	3.02077e+06		2.07378e+06	1.70013e+06	214148	306195
451767	QCR2_MOUSE	Uqcrc2	QCR2_MOUSE		sp|Q9DB77|QCR2_MOUSE Cytochrome b-c1 complex subunit 2, mitochondrial OS=Mus musculus OX=10090 GN=Uqcrc2 PE=1 SV=1	162.547	true	2	1	0	11.92	48235	22	4	4	4	4	6	6	4	1	4	2	1	4	2	1	4	1	0	1	0	0	2	1	0	2	0	100581	907699	1180726	74964.5	2.61141e+06	550411	16398.8	1.86814e+06	373297	37240.7	651736
451749	NASP_MOUSE	Nasp	NASP_MOUSE		sp|Q99MD9|NASP_MOUSE Nuclear autoantigenic sperm protein OS=Mus musculus OX=10090 GN=Nasp PE=1 SV=2	47.754	true	2	1	0	2.46	83954	43	2	2	2	2	2	2	2	2	1	2	1	2	1		1	2	0	0	0	0	2	0	0	0	0	628081	82074.4	308706	27891.7	1219993	183362		345985	569655	222743	10334.8
452065	CYC_MOUSE	Cycs	CYC_MOUSE		sp|P62897|CYC_MOUSE Cytochrome c, somatic OS=Mus musculus OX=10090 GN=Cycs PE=1 SV=2	30.594	true	2	1	0	10.48	11605	8	1	1	1	1	2	2	1			1		1	1	1	1		0	0	0	0	1	0	0	1	0			977172		1640733	712387	2939.08	3.12512e+06		12446.4	12408.4
452004	TECR_MOUSE	Tecr	TECR_MOUSE		sp|Q9CY27|TECR_MOUSE Very-long-chain enoyl-CoA reductase OS=Mus musculus OX=10090 GN=Tecr PE=1 SV=1	64.459	true	2	1	0	5.19	36090	16	2	2	2	2	2	2	2	1	1	2	2	1	2		1	1	1	0	0	0	0	0	0	1	0	806626	14981.2	178240	510759	116390	158545		1000058	14100.6	116105	7463.85
452082	MAGT1_MOUSE	Magt1	MAGT1_MOUSE		sp|Q9CQY5|MAGT1_MOUSE Magnesium transporter protein 1 OS=Mus musculus OX=10090 GN=Magt1 PE=1 SV=1	54.808	true	2	1	0	5.07	37970	17	2	2	2	2	4	4	2	1	2	2		1	2		2	2	0	0	2	0	0	0	0	1	0	144221	846191	967226		614549	773876		2141529	189011	10950.3	430512
451435	MEMO1_MOUSE	Memo1	MEMO1_MOUSE		sp|Q91VH6|MEMO1_MOUSE Protein MEMO1 OS=Mus musculus OX=10090 GN=Memo1 PE=1 SV=1	45.978	true	2	1	0	4.38	33692	19	1	1	1	1	1	1	1		1				1		1		0	0	0	0	0	0	0	1	0		144003				94802.6		510101		12446.4	89366.4
450654	UD11_MOUSE	Ugt1a1	UD11_MOUSE; UD12_MOUSE; UD16_MOUSE; UD17_MOUSE; UD19_MOUSE; UDB17_MOUSE		sp|Q63886|UD11_MOUSE UDP-glucuronosyltransferase 1A1 OS=Mus musculus OX=10090 GN=Ugt1a1 PE=1 SV=2	31.737	true	2	6	0	2.24	60047	26	1	1	1	1	1	1	1			1	1	1			1		0	0	0	0	1	0	0	0	0			84836.8	93643.9	558498			204828		12446.4	12408.4
452119	DIP2B_MOUSE	Dip2b	DIP2B_MOUSE		sp|Q3UH60|DIP2B_MOUSE Disco-interacting protein 2 homolog B OS=Mus musculus OX=10090 GN=Dip2b PE=1 SV=1	45.222	true	2	1	0	1.14	171126	85	2	2	2	2	2	2	2	1	2	1	1	2	2	1	2	1	0	0	0	0	0	0	0	2	0	443245	218073	36132.8	162636	296056	295325	2823.79	1.58661e+06	16234.8	68737.4	155541
451798	CATA_MOUSE	Cat	CATA_MOUSE		sp|P24270|CATA_MOUSE Catalase OS=Mus musculus OX=10090 GN=Cat PE=1 SV=4	73.715	true	2	1	0	5.5	59795	35	3	3	3	3	3	3	3	1		1	2	1	1	1			0	0	0	1	1	0	1	0	0	3128.41		13624	410654	241345	12924.5	618292			60977.9	12408.4
451259	HM13_MOUSE	Hm13	HM13_MOUSE		sp|Q9D8V0|HM13_MOUSE Minor histocompatibility antigen H13 OS=Mus musculus OX=10090 GN=Hm13 PE=1 SV=1	94.282	true	2	1	0	6.08	41748	17	2	2	2	2	2	2	2	1	2	2	1	2	1		2	1	0	0	0	0	1	0	0	1	0	32428.2	463788	214175	44817.5	647590	74694.4		1.09704e+06	87717.4	13332	256490
451129	MYO9B_MOUSE	Myo9b	MYO9B_MOUSE		sp|Q9QY06|MYO9B_MOUSE Unconventional myosin-IXb OS=Mus musculus OX=10090 GN=Myo9b PE=1 SV=2	20.872	true	2	1	0	0.38	238834	132	1	1	1	1	1	1	1					1				1	0	0	0	0	1	0	0	0	0					48203.4				5168.81	12446.4	12408.4
451177	HPBP1_MOUSE	Hspbp1	HPBP1_MOUSE		sp|Q99P31|HPBP1_MOUSE Hsp70-binding protein 1 OS=Mus musculus OX=10090 GN=Hspbp1 PE=1 SV=1	34.425	true	2	1	0	2.8	39166	20	1	1	1	1	1	1	1	1				1			1		0	0	0	0	0	0	0	1	0	181779				89200.6			997195		181779	12408.4
451651	BIN2_MOUSE	Bin2	BIN2_MOUSE		sp|D3Z6Q9|BIN2_MOUSE Bridging integrator 2 OS=Mus musculus OX=10090 GN=Bin2 PE=1 SV=1	62.033	true	2	1	0	2.86	52554	23	2	2	2	2	2	2	2	1	2	1	1	2	1	1	2	1	0	0	0	0	2	0	0	0	0	11792.5	791726	493523	7847.02	2.27167e+06	370758	6752.22	853320	41664.2	12083.7	130201
450710	DENR_MOUSE	Denr	DENR_MOUSE		sp|Q9CQJ6|DENR_MOUSE Density-regulated protein OS=Mus musculus OX=10090 GN=Denr PE=1 SV=1	19.346	true	2	1	0	4.04	22166	9	1	1	1	1	1	1	1		1	1	1	1	1		1	1	0	0	0	0	0	0	0	1	0		84121.9	84224.2	64086.3	224964	79847.6		321000	33580.1	12446.4	52205.1
451532	S10A4_MOUSE	S100a4	S10A4_MOUSE		sp|P07091|S10A4_MOUSE Protein S100-A4 OS=Mus musculus OX=10090 GN=S100a4 PE=1 SV=1	89.572	true	2	1	0	16.83	11721	5	2	2	3	3	5	5	3	1	3	3	1	3	3	1	3	3	0	0	1	0	2	1	0	1	0	8087.95	1330234	1.18999e+06	10376.8	2224216	1.20432e+06	6201.23	2.41694e+06	993688	11733.2	1.10314e+06
450894	ABCF3_MOUSE	Abcf3	ABCF3_MOUSE		sp|Q8K268|ABCF3_MOUSE ATP-binding cassette sub-family F member 3 OS=Mus musculus OX=10090 GN=Abcf3 PE=1 SV=1	28.597	true	2	1	0	1.69	79863	40	1	1	1	1	1	1	1	1		1		1	1		1		0	0	0	0	0	0	0	1	0	40383.6		45576.2		129953	36165.6		339686		40383.6	12408.4
451160	PBDC1_MOUSE	Pbdc1	PBDC1_MOUSE		sp|Q9D0B6|PBDC1_MOUSE Protein PBDC1 OS=Mus musculus OX=10090 GN=Pbdc1 PE=1 SV=1	28.55	true	2	1	0	5.05	22223	13	1	1	1	1	1	1	1	1		1	1				1		0	0	0	0	0	0	0	1	0	74395.4		32448	350797				438556		74395.4	12408.4
450603	HVM17_MOUSE		HVM17_MOUSE; HVM18_MOUSE; HVM19_MOUSE; HVM20_MOUSE; HVM21_MOUSE; HVM22_MOUSE; HVM23_MOUSE; HVM24_MOUSE; HVM25_MOUSE		sp|P01786|HVM17_MOUSE Ig heavy chain V region MOPC 47A OS=Mus musculus OX=10090 PE=1 SV=1	62.431	true	2	9	0	13.68	12974	7	1	1	1	1	1	1	1	1							1		0	0	0	0	0	0	0	1	0	181711							964473		181711	12408.4
451126	SRSF7_MOUSE	Srsf7	SRSF7_MOUSE		sp|Q8BL97|SRSF7_MOUSE Serine/arginine-rich splicing factor 7 OS=Mus musculus OX=10090 GN=Srsf7 PE=1 SV=1	108.581	true	2	1	0	13.11	30818	15	3	3	3	3	7	7	3	1	2	3	2	2	2		3	2	0	0	2	1	1	0	0	2	1	83614.2	3.48954e+06	3.35098e+06	531638	7027865	3.67133e+06		7939429	2.10238e+06	15629.8	1.59709e+06
451640	DDX41_MOUSE	Ddx41	DDX41_MOUSE		sp|Q91VN6|DDX41_MOUSE Probable ATP-dependent RNA helicase DDX41 OS=Mus musculus OX=10090 GN=Ddx41 PE=1 SV=2	27.85	true	2	1	0	1.45	69820	47	1	1	1	1	1	1	1		1	1		1	1		1	1	0	0	0	0	0	0	0	1	0		31719.6	258927		230732	178086		284824	42105.1	12446.4	19684.8
451003	HS71A_MOUSE	Hspa1a	HS71A_MOUSE; HS71B_MOUSE		sp|Q61696|HS71A_MOUSE Heat shock 70 kDa protein 1A OS=Mus musculus OX=10090 GN=Hspa1a PE=1 SV=2	383.367	true	2	2	0	16.69	70079	37	9	3	9	3	39	4	3	3	3	2	2	3	1	1	3	2	1	0	0	0	0	0	0	3	0	11890510	11966534	7.49446e+06	7513266	27034648	10782580	2848358	108731544	3.77206e+06	1.79796e+06	582835
451133	DAD1_MOUSE	Dad1	DAD1_MOUSE		sp|P61804|DAD1_MOUSE Dolichyl-diphosphooligosaccharide--protein glycosyltransferase subunit DAD1 OS=Mus musculus OX=10090 GN=Dad1 PE=1 SV=3	27.256	true	2	1	0	8.85	12497	5	1	1	1	1	1	1	1		1	1		1	1		1	1	0	0	0	0	0	0	0	1	0		308918	289278		655406	70314.9		2.19415e+06	58245.6	12446.4	191711
450862	CAZA1_MOUSE	Capza1	CAZA1_MOUSE		sp|P47753|CAZA1_MOUSE F-actin-capping protein subunit alpha-1 OS=Mus musculus OX=10090 GN=Capza1 PE=1 SV=4	87.779	true	2	1	0	16.78	32940	17	3	2	3	2	4	3	2		2	1		2	1		2		0	1	0	0	0	0	0	2	0	365719	4361648	2.16036e+06		1.01668e+06	320551		11199228		12446.4	305289
451825	RDH12_MOUSE	Rdh12	RDH12_MOUSE		sp|Q8BYK4|RDH12_MOUSE Retinol dehydrogenase 12 OS=Mus musculus OX=10090 GN=Rdh12 PE=2 SV=1	76.856	true	2	1	0	6.96	35292	22	2	2	2	2	2	2	1	1	1			1			1		0	0	0	0	0	0	0	1	0	156763	156804			250200			6249584		156763	97310.6
451220	VPP1_MOUSE	Atp6v0a1	VPP1_MOUSE		sp|Q9Z1G4|VPP1_MOUSE V-type proton ATPase 116 kDa subunit a1 OS=Mus musculus OX=10090 GN=Atp6v0a1 PE=1 SV=3	26.075	true	2	1	0	1.19	96467	39	1	1	1	1	1	1	1	1		1					1		0	0	0	0	0	0	0	1	0	133857		44278.1					1.02302e+06		133857	12408.4
450940	LYN_MOUSE	Lyn	LYN_MOUSE	BLK_MOUSE; CDK20_MOUSE; CILK1_MOUSE; FGFR1_MOUSE; FGFR2_MOUSE; FGFR3_MOUSE; FGFR4_MOUSE; FGR_MOUSE; FYN_MOUSE; HCK_MOUSE; LCK_MOUSE; MAK_MOUSE; YES_MOUSE	sp|P25911|LYN_MOUSE Tyrosine-protein kinase Lyn OS=Mus musculus OX=10090 GN=Lyn PE=1 SV=4	101.932	true	2	1	13	4.88	58812	33	3	3	3	3	5	5	3	1	3	3	2	3	2	1	3	3	0	1	1	0	1	0	0	2	0	485909	1.66872e+06	1.26105e+06	273837	3.28556e+06	785603	12702.9	2.66622e+06	321111	18023.4	699156
451347	TPR_MOUSE	Tpr	TPR_MOUSE		sp|F6ZDS4|TPR_MOUSE Nucleoprotein TPR OS=Mus musculus OX=10090 GN=Tpr PE=1 SV=1	25.908	true	2	1	0	0.33	273990	145	1	1	1	1	1	1	1		1	1	1	1	1	1	1	1	0	0	1	0	0	0	0	0	0		123536	119721	91730	311721	69836.7	5004.45	256273	61706.3	12446.4	76665.2
450951	NRM_MOUSE	Nrm	NRM_MOUSE		sp|Q8VC65|NRM_MOUSE Nurim OS=Mus musculus OX=10090 GN=Nrm PE=1 SV=1	24.782	true	2	1	0	3.05	29434	14	1	1	1	1	1	1	1			1		1	1		1		0	0	1	0	0	0	0	0	0			248216		497316	133735		519047		12446.4	12408.4
451395	ACAD8_MOUSE	Acad8	ACAD8_MOUSE		sp|Q9D7B6|ACAD8_MOUSE Isobutyryl-CoA dehydrogenase, mitochondrial OS=Mus musculus OX=10090 GN=Acad8 PE=1 SV=2	23.028	true	2	1	0	1.94	45020	26	1	1	1	1	1	1	1	1				1	1		1		0	0	0	0	0	0	0	1	0	79597.9				189386	10969		389820		79597.9	12408.4
451422	ROA1_MOUSE	Hnrnpa1	ROA1_MOUSE		sp|P49312|ROA1_MOUSE Heterogeneous nuclear ribonucleoprotein A1 OS=Mus musculus OX=10090 GN=Hnrnpa1 PE=1 SV=2	178.549	true	2	1	0	18.12	34196	19	5	4	5	4	8	7	4	1	3	3		4	2	1	4	2	0	2	2	0	1	0	0	2	0	677081	2546721	2143125		5569913	1.73195e+06	8204.61	14060278	151171	25198.3	1.52576e+06
450971	GBRAP_MOUSE	Gabarap	GBRAP_MOUSE; GBRL1_MOUSE; GBRL2_MOUSE		sp|Q9DCD6|GBRAP_MOUSE Gamma-aminobutyric acid receptor-associated protein OS=Mus musculus OX=10090 GN=Gabarap PE=1 SV=2	12.557	true	2	3	0	5.98	13918	4	1	1	1	1	4	4	1		1	1		1	1		1	1	0	0	1	0	1	1	0	1	0		710802	1.11526e+06		2.26361e+06	689537		4.63137e+06	233941	12446.4	441116
450954	MP2K3_MOUSE	Map2k3	MP2K3_MOUSE		sp|O09110|MP2K3_MOUSE Dual specificity mitogen-activated protein kinase kinase 3 OS=Mus musculus OX=10090 GN=Map2k3 PE=1 SV=2	28.221	true	2	1	0	2.31	39296	25	1	1	1	1	1	1	1		1	1		1	1		1		0	0	0	0	0	0	0	1	0		63671	72965.5		52724.2	111601		477189		12446.4	39513.5
450880	STXB3_MOUSE	Stxbp3	STXB3_MOUSE		sp|Q60770|STXB3_MOUSE Syntaxin-binding protein 3 OS=Mus musculus OX=10090 GN=Stxbp3 PE=1 SV=1	31.419	true	2	1	0	1.69	67942	36	1	1	1	1	1	1	1	1		1	1	1	1		1		0	0	0	0	0	0	0	1	0	112837		20983.1	17478.8	103556	27189.2		390457		112837	12408.4
451105	SMHD1_MOUSE	Smchd1	SMHD1_MOUSE		sp|Q6P5D8|SMHD1_MOUSE Structural maintenance of chromosomes flexible hinge domain-containing protein 1 OS=Mus musculus OX=10090 GN=Smchd1 PE=1 SV=2	22.006	true	2	1	0	0.45	225645	129	1	1	1	1	1	1	1		1	1		1	1		1	1	0	0	0	0	0	0	0	1	0		634521	63397.3		327970	106124		212820	254079	12446.4	393777
451671	FABP5_MOUSE	Fabp5	FABP5_MOUSE		sp|Q05816|FABP5_MOUSE Fatty acid-binding protein 5 OS=Mus musculus OX=10090 GN=Fabp5 PE=1 SV=3	98.273	true	2	1	0	13.33	15137	10	2	2	2	2	10	10	2	1	2	2	1	1	2		2	2	1	3	0	2	1	1	0	1	1	234734	38240848	1.74482e+06	2.91203e+06	3185352	1.89246e+06		104905448	2.02075e+06	134484	10050566
451139	MARH5_MOUSE	Marchf5	MARH5_MOUSE		sp|Q3KNM2|MARH5_MOUSE E3 ubiquitin-protein ligase MARCHF5 OS=Mus musculus OX=10090 GN=Marchf5 PE=1 SV=1	30.425	true	2	1	0	5.76	31232	17	1	1	1	1	1	1	1	1		1		1	1		1		0	0	0	0	0	0	0	1	0	51797.1		66321.7		182840	40132.1		559729		51797.1	12408.4
450500	A16A1_MOUSE	Aldh16a1	A16A1_MOUSE		sp|Q571I9|A16A1_MOUSE Aldehyde dehydrogenase family 16 member A1 OS=Mus musculus OX=10090 GN=Aldh16a1 PE=1 SV=2	48.122	true	2	1	0	1.37	84756	27	1	1	1	1	4	4	1		1	1		1	1		1	1	0	1	0	0	1	0	0	1	1		198523	212578		504296	190618		281563	199885	12446.4	123201
451039	RU2A_MOUSE	Snrpa1	RU2A_MOUSE		sp|P57784|RU2A_MOUSE U2 small nuclear ribonucleoprotein A' OS=Mus musculus OX=10090 GN=Snrpa1 PE=1 SV=2	46.131	true	2	1	0	4.71	28357	14	1	1	1	1	1	1	1		1	1	1	1	1		1	1	0	0	0	0	1	0	0	0	0		305856	199088	321687	752063	845783		263223	304567	12446.4	189810
452079	ADH1_MOUSE	Adh1	ADH1_MOUSE		sp|P00329|ADH1_MOUSE Alcohol dehydrogenase 1 OS=Mus musculus OX=10090 GN=Adh1 PE=1 SV=2	20.745	true	2	1	0	2.13	39771	19	1	1	1	1	1	1	1		1	1					1		0	1	0	0	0	0	0	0	0		788926	36417.7					2.86959e+06		12446.4	489598
450667	TM87A_MOUSE	Tmem87a	TM87A_MOUSE		sp|Q8BXN9|TM87A_MOUSE Transmembrane protein 87A OS=Mus musculus OX=10090 GN=Tmem87a PE=1 SV=1	12.706	true	2	1	0	1.26	63380	30	1	1	1	1	1	1	1		1	1		1	1		1		0	0	0	0	0	0	0	1	0		70165	77968.5		113681	73702.8		541068		12446.4	43543.6
451866	PUR8_MOUSE	Adsl	PUR8_MOUSE		sp|P54822|PUR8_MOUSE Adenylosuccinate lyase OS=Mus musculus OX=10090 GN=Adsl PE=1 SV=2	25.911	true	2	1	0	2.27	54866	31	1	1	1	1	2	2	1		1	1		1	1		1	1	0	0	0	0	1	0	0	1	0		158646	93738.2		314031	116986		298863	64576.6	12446.4	98454
451183	NEK9_MOUSE	Nek9	NEK9_MOUSE		sp|Q8K1R7|NEK9_MOUSE Serine/threonine-protein kinase Nek9 OS=Mus musculus OX=10090 GN=Nek9 PE=1 SV=2	32.005	true	2	1	0	0.91	107143	54	1	1	1	1	1	1	1			1		1			1		0	0	0	0	1	0	0	0	0			90399		336299			177570		12446.4	12408.4
451174	TCPE_MOUSE	Cct5	TCPE_MOUSE		sp|P80316|TCPE_MOUSE T-complex protein 1 subunit epsilon OS=Mus musculus OX=10090 GN=Cct5 PE=1 SV=1	147.547	true	2	1	0	5.91	59624	37	4	4	4	4	6	6	4	2	3	4	2	3	4	1	4	2	0	1	0	1	1	0	0	3	0	234330	1.37757e+06	1.38624e+06	417341	3.21968e+06	1.22702e+06	4809.81	9476520	646098	47745.8	680751
451299	SMD2_MOUSE	Snrpd2	SMD2_MOUSE		sp|P62317|SMD2_MOUSE Small nuclear ribonucleoprotein Sm D2 OS=Mus musculus OX=10090 GN=Snrpd2 PE=1 SV=1	66.157	true	2	1	0	16.1	13526	8	2	2	2	2	4	4	2		2	2		2	2		2	1	0	0	0	0	2	2	0	0	0		1.1662e+06	926697		2.58412e+06	1.52991e+06		3942417	275811	12446.4	624741
451033	PA24E_MOUSE	Pla2g4e	PA24E_MOUSE		sp|Q50L42|PA24E_MOUSE Cytosolic phospholipase A2 epsilon OS=Mus musculus OX=10090 GN=Pla2g4e PE=1 SV=1	43.578	true	2	1	0	1.03	100155	40	1	1	1	1	1	1	1		1	1				1	1		0	0	0	0	0	0	0	1	0		498536	41098.9				10231.6	748277		12446.4	309386
451021	MBOA7_MOUSE	Mboat7	MBOA7_MOUSE		sp|Q8CHK3|MBOA7_MOUSE Lysophospholipid acyltransferase 7 OS=Mus musculus OX=10090 GN=Mboat7 PE=1 SV=1	28.207	true	2	1	0	1.48	53436	18	1	1	1	1	1	1	1		1	1	1	1	1		1	1	0	0	1	0	0	0	0	0	0		131801	126596	269362	434139	71648.8		466842	45478.3	12446.4	81794.4
450841	HNRL2_MOUSE	Hnrnpul2	HNRL2_MOUSE		sp|Q00PI9|HNRL2_MOUSE Heterogeneous nuclear ribonucleoprotein U-like protein 2 OS=Mus musculus OX=10090 GN=Hnrnpul2 PE=1 SV=2	60.958	true	2	1	0	2.55	84940	41	2	2	2	2	3	3	2	1	1	2	1	2	1	1	2	1	0	0	0	0	2	0	0	1	0	340934	111540	335982	115351	903098	101810	7894.76	715701	23315.9	67383.4	14401.8
450638	A1AT6_MOUSE	Serpina1f	A1AT6_MOUSE		sp|Q9DCQ7|A1AT6_MOUSE Alpha-1-antitrypsin 1-6 OS=Mus musculus OX=10090 GN=Serpina1f PE=2 SV=1	26.309	true	2	1	0	1.95	46336	21	1	1	1	1	1	1	1	1			1			1	1	1	1	0	0	0	0	0	0	0	0	553924			115447			6919.27	72847.3	249609	553924	12408.4
451242	ABCB7_MOUSE	Abcb7	ABCB7_MOUSE		sp|Q61102|ABCB7_MOUSE ATP-binding cassette sub-family B member 7, mitochondrial OS=Mus musculus OX=10090 GN=Abcb7 PE=1 SV=3	22.415	true	2	1	0	1.46	82581	41	1	1	1	1	1	1	1			1		1	1		1		0	0	0	0	1	0	0	0	0			159727		453439	152027		304123		12446.4	12408.4
451879	CLCA_MOUSE	Clta	CLCA_MOUSE		sp|O08585|CLCA_MOUSE Clathrin light chain A OS=Mus musculus OX=10090 GN=Clta PE=1 SV=2	30.281	true	2	1	0	6.38	25604	10	2	2	2	2	2	2	2		1	2		2	1		2	1	0	0	0	0	0	0	0	2	0		306860	329374		841813	144520		1.44451e+06	16327.4	12446.4	46040.9
450548	NFL_MOUSE	Nefl	NFL_MOUSE	NFM_MOUSE	sp|P08551|NFL_MOUSE Neurofilament light polypeptide OS=Mus musculus OX=10090 GN=Nefl PE=1 SV=5	66.613	true	2	1	1	3.13	61508	42	2	1	2	1	4	2	1	1		1	1	1	1		1	1	0	0	0	1	0	0	0	1	0	3.60113e+06	1.99438e+06	3.01725e+06	11279193	15635225	3761351	6148.09	8335434	50674.3	218098	12408.4
451978	PSB10_MOUSE	Psmb10	PSB10_MOUSE		sp|O35955|PSB10_MOUSE Proteasome subunit beta type-10 OS=Mus musculus OX=10090 GN=Psmb10 PE=1 SV=1	54.354	true	2	1	0	8.06	29063	13	2	2	2	2	2	2	2		1	2		1			2		0	0	0	0	1	0	0	1	0		531242	889011		1.64064e+06			1.27191e+06		12446.4	24493.2
451956	PNKP_MOUSE	Pnkp	PNKP_MOUSE		sp|Q9JLV6|PNKP_MOUSE Bifunctional polynucleotide phosphatase/kinase OS=Mus musculus OX=10090 GN=Pnkp PE=1 SV=2	92.521	true	2	1	0	6.13	57223	30	3	3	3	3	3	3	3		2	1	1	3	2		2		0	1	0	0	2	0	0	0	0		391287	165298	24181	1.28481e+06	287494		507456		12446.4	166099
451197	ALDOC_MOUSE	Aldoc	ALDOC_MOUSE	ALDOB_MOUSE	sp|P05063|ALDOC_MOUSE Fructose-bisphosphate aldolase C OS=Mus musculus OX=10090 GN=Aldoc PE=1 SV=4	51.714	true	2	1	1	9.09	39395	24	3	2	3	2	5	2	2	2	1	2	2	1	2		2	1	0	0	0	0	0	0	0	2	0	2.41258e+06	1.50312e+06	1192723	1.15889e+06	2.11026e+06	610122		13814297	181836	671435	11272.5
451466	ARP3_MOUSE	Actr3	ARP3_MOUSE		sp|Q99JY9|ARP3_MOUSE Actin-related protein 3 OS=Mus musculus OX=10090 GN=Actr3 PE=1 SV=3	185.294	true	2	1	0	16.75	47357	22	5	5	5	5	12	12	4	2	4	4	1	4	4	1	4	1	0	1	1	0	3	2	1	1	2	304593	3085759	3582721	3.63116e+06	10565782	3.40876e+06	132766	13623684	1.95273e+06	77067.1	2.41185e+06
451119	H2AY_MOUSE	Macroh2a1	H2AY_MOUSE	H2AW_MOUSE	sp|Q9QZQ8|H2AY_MOUSE Core histone macro-H2A.1 OS=Mus musculus OX=10090 GN=Macroh2a1 PE=1 SV=3	336.346	true	2	1	1	30.38	39735	19	11	11	11	11	17	17	11	3	7	8	2	11	9	2	11	3	2	1	0	0	4	1	0	9	0	4570398	15135422	2.55476e+06	521180	54471456	6.27176e+06	68352.9	175056080	189325	208198	9981798
450637	LA_MOUSE	Ssb	LA_MOUSE		sp|P32067|LA_MOUSE Lupus La protein homolog OS=Mus musculus OX=10090 GN=Ssb PE=1 SV=1	202.087	true	2	1	0	13.49	47756	30	7	7	7	7	12	12	7	2	6	6	2	7	5		6	4	0	0	0	0	5	2	0	4	1	652807	1.30476e+06	963668	1.3014e+06	14311842	4558947		8753253	1.42269e+06	53049.6	1.00943e+06
451441	GIPC1_MOUSE	Gipc1	GIPC1_MOUSE		sp|Q9Z0G0|GIPC1_MOUSE PDZ domain-containing protein GIPC1 OS=Mus musculus OX=10090 GN=Gipc1 PE=1 SV=1	34.981	true	2	1	0	3.6	36128	18	1	1	1	1	1	1	1		1	1		1			1		0	0	0	0	0	0	0	1	0		131265	54353.1		120747			630218		12446.4	81461.7
450867	RENR_MOUSE	Atp6ap2	RENR_MOUSE		sp|Q9CYN9|RENR_MOUSE Renin receptor OS=Mus musculus OX=10090 GN=Atp6ap2 PE=1 SV=2	10.889	true	2	1	0	2.29	39092	17	1	1	1	1	1	1	1		1	1		1	1		1	1	0	0	0	0	0	0	0	1	0		136816	50503.1		146501	73307.8		938694	8453.7	12446.4	84906.3
450717	1433E_MOUSE	Ywhae	1433E_MOUSE		sp|P62259|1433E_MOUSE 14-3-3 protein epsilon OS=Mus musculus OX=10090 GN=Ywhae PE=1 SV=1	619.668	true	2	1	0	52.55	29173	18	13	10	16	13	32	26	13	6	6	10	2	10	8	2	13	5	2	1	1	0	5	2	0	15	0	7406257	8253975	6070060	196469	21179730	3751872	496437	158952768	801299	1.17851e+06	787845
451590	PPIL1_MOUSE	Ppil1	PPIL1_MOUSE		sp|Q9D0W5|PPIL1_MOUSE Peptidyl-prolyl cis-trans isomerase-like 1 OS=Mus musculus OX=10090 GN=Ppil1 PE=1 SV=1	24.854	true	2	1	0	4.82	18236	10	1	1	1	1	1	1	1		1	1			1		1	1	0	0	0	0	0	0	0	1	0		28896.1	102315			222238		474303	7026.41	12446.4	17932.6
450716	1433B_MOUSE	Ywhab	1433B_MOUSE		sp|Q9CQV8|1433B_MOUSE 14-3-3 protein beta/alpha OS=Mus musculus OX=10090 GN=Ywhab PE=1 SV=3	255.981	true	2	1	0	36.99	28086	17	8	3	8	3	17	4	3	2	2	2	1	1	2	1	2	1	2	0	1	1	0	0	0	0	0	6916468	16258744	9297599	740526	28754550	7466578	834957	364086816	4.64143e+06	935232	532130
451998	FUBP2_MOUSE	Khsrp	FUBP2_MOUSE		sp|Q3U0V1|FUBP2_MOUSE Far upstream element-binding protein 2 OS=Mus musculus OX=10090 GN=Khsrp PE=1 SV=2	63.439	true	2	1	0	3.74	76775	39	3	3	3	3	7	7	3	1	3	2		2	3	1	3	2	0	1	0	0	2	1	0	1	2	597140	857140	1.15401e+06		2.28637e+06	805307	4830.45	4334388	585923	20640.3	739510
450929	PCP_MOUSE	Prcp	PCP_MOUSE		sp|Q7TMR0|PCP_MOUSE Lysosomal Pro-X carboxypeptidase OS=Mus musculus OX=10090 GN=Prcp PE=1 SV=2	22.419	true	2	1	0	2.04	55027	21	1	1	1	1	1	1	1			1		1	1		1		0	0	1	0	0	0	0	0	0			349628		519168	235638		592333		12446.4	12408.4
451526	DD19A_MOUSE	Ddx19a	DD19A_MOUSE		sp|Q61655|DD19A_MOUSE ATP-dependent RNA helicase DDX19A OS=Mus musculus OX=10090 GN=Ddx19a PE=1 SV=2	24.565	true	2	1	0	2.51	53933	34	1	1	1	1	1	1	1	1		1		1	1		1		0	0	0	0	0	0	0	1	0	77488.6		45135.3		209523	57635.9		475035		77488.6	12408.4
451120	VPS35_MOUSE	Vps35	VPS35_MOUSE		sp|Q9EQH3|VPS35_MOUSE Vacuolar protein sorting-associated protein 35 OS=Mus musculus OX=10090 GN=Vps35 PE=1 SV=1	189.37	true	2	1	0	8.54	91713	48	5	5	5	5	5	5	5	1	3	3		3	3		5	1	0	0	0	0	2	0	0	3	0	437955	357283	783779		1.98411e+06	681198		6736731	18983.3	12446.2	243409
452127	3BP1_MOUSE	Sh3bp1	3BP1_MOUSE		sp|P55194|3BP1_MOUSE SH3 domain-binding protein 1 OS=Mus musculus OX=10090 GN=Sh3bp1 PE=1 SV=3	36.42	true	2	1	0	1.62	74172	37	1	1	1	1	1	1	1	1	1			1			1		0	0	0	0	0	0	0	1	0	40043.8	63177.9			126268			501889		40043.8	39207.5
451420	SGMR1_MOUSE	Sigmar1	SGMR1_MOUSE		sp|O55242|SGMR1_MOUSE Sigma non-opioid intracellular receptor 1 OS=Mus musculus OX=10090 GN=Sigmar1 PE=1 SV=1	15.134	true	2	1	0	3.59	25250	7	1	1	1	1	1	1	1		1						1		0	0	0	0	0	0	0	1	0		363713						892794		12446.4	225716
450933	NECP2_MOUSE	Necap2	NECP2_MOUSE		sp|Q9D1J1|NECP2_MOUSE Adaptin ear-binding coat-associated protein 2 OS=Mus musculus OX=10090 GN=Necap2 PE=1 SV=1	47.478	true	2	1	0	10.15	28598	16	1	1	1	1	1	1	1		1			1			1		0	0	0	0	0	0	0	1	0		219744			682277			538718		12446.4	136370
450835	MRCKB_MOUSE	Cdc42bpb	MRCKB_MOUSE; RHG25_MOUSE		sp|Q7TT50|MRCKB_MOUSE Serine/threonine-protein kinase MRCK beta OS=Mus musculus OX=10090 GN=Cdc42bpb PE=1 SV=2	5.83	true	2	2	0	0.41	194753	94	1	1	1	1	3	3	1	1	1	1	1	1	1		1	1	0	0	0	0	1	0	0	1	1	114309	126800	130940	18820.8	341809	175399		1.79214e+06	92471.9	114309	78690.9
450765	MDHC_MOUSE	Mdh1	MDHC_MOUSE		sp|P14152|MDHC_MOUSE Malate dehydrogenase, cytoplasmic OS=Mus musculus OX=10090 GN=Mdh1 PE=1 SV=3	125.834	true	2	1	0	8.98	36511	21	3	3	3	3	9	9	2	1	2	2		2	2		2	2	1	1	1	0	1	1	0	2	1	973559	1.46458e+06	1.52129e+06		2.27517e+06	732773		11118826	2266032	119879	1.35267e+06
450917	PYR1_MOUSE	Cad	PYR1_MOUSE	CPSM_MOUSE	sp|B2RQC6|PYR1_MOUSE CAD protein OS=Mus musculus OX=10090 GN=Cad PE=1 SV=1	86.234	true	2	1	1	1.62	243238	120	4	4	4	4	5	5	4	2	1	4	1	4	3		2	2	0	0	2	0	1	1	0	1	0	259698	381660	803497	62073.1	2.16645e+06	316020		1.32504e+06	108536	94518.1	8557.58
451622	CBPA2_MOUSE	Cpa2	CBPA2_MOUSE; CBPA4_MOUSE		sp|Q504N0|CBPA2_MOUSE Carboxypeptidase A2 OS=Mus musculus OX=10090 GN=Cpa2 PE=1 SV=1	23.909	true	2	2	0	1.68	47056	22	1	1	1	1	1	1	1	1			1				1	1	0	0	0	0	0	0	0	1	0	295701			215209				985282	14895.4	295701	12408.4
451967	PSD11_MOUSE	Psmd11	PSD11_MOUSE		sp|Q8BG32|PSD11_MOUSE 26S proteasome non-ATPase regulatory subunit 11 OS=Mus musculus OX=10090 GN=Psmd11 PE=1 SV=3	149.42	true	2	1	0	14.69	47437	32	5	5	5	5	6	6	4		3	3		3	2		3	1	0	0	1	0	1	0	0	3	0		538975	716302		1.8068e+06	332168		5.74958e+06	181515	12446.4	312992
452115	SPTB2_MOUSE	Sptbn1	SPTB2_MOUSE		sp|Q62261|SPTB2_MOUSE Spectrin beta chain, non-erythrocytic 1 OS=Mus musculus OX=10090 GN=Sptbn1 PE=1 SV=2	424.178	true	2	1	0	5.8	274223	163	13	13	13	13	18	18	12	4	8	10	4	9	12	1	10	7	0	0	1	1	5	1	0	8	1	1.10184e+06	2014155	2.25037e+06	4924829	4.65218e+06	1.68617e+06	44179.7	8422594	882086	165853	1.64122e+06
451738	SMC1A_MOUSE	Smc1a	SMC1A_MOUSE		sp|Q9CU62|SMC1A_MOUSE Structural maintenance of chromosomes protein 1A OS=Mus musculus OX=10090 GN=Smc1a PE=1 SV=4	71.889	true	2	1	0	2.19	143235	88	3	3	3	3	4	4	2		2	2	1	2	2		2	1	0	1	0	0	1	0	0	1	0		436156	317713	104666	937419	464392		952986	79037.6	12446.4	227693
451398	STOM_MOUSE	Stom	STOM_MOUSE		sp|P54116|STOM_MOUSE Stomatin OS=Mus musculus OX=10090 GN=Stom PE=1 SV=3	70.817	true	2	1	0	6.69	31375	17	2	2	2	2	2	2	2		1	1		1	1		1	1	0	0	1	0	1	0	0	0	0		16136.7	419225		51313.8	309787		495558	286577	12446.4	144876
451480	C1TM_MOUSE	Mthfd1l	C1TM_MOUSE		sp|Q3V3R1|C1TM_MOUSE Monofunctional C1-tetrahydrofolate synthase, mitochondrial OS=Mus musculus OX=10090 GN=Mthfd1l PE=1 SV=2	130.218	true	2	1	0	4.09	105729	58	4	4	4	4	7	7	4	2	3	4	2	4	3		4	3	0	0	2	1	3	0	0	1	0	96570.2	899286	948355	192652	2.35779e+06	628085		1.77325e+06	467754	20169	441262
450597	LV1B_MOUSE		LV1B_MOUSE; LV1C_MOUSE		sp|P01724|LV1B_MOUSE Ig lambda-1 chain V regions MOPC 104E/RPC20/J558/S104 OS=Mus musculus OX=10090 PE=1 SV=1	23.923	true	2	2	0	6.98	13479	4	1	1	1	1	2	2	1	1	1	1		1	1		1	1	0	0	0	0	0	0	0	2	0	86382.9	80312.7	13361.2		244075	117372		767324	10036.8	86382.9	49841.1
451490	RBMX2_MOUSE	Rbmx2	RBMX2_MOUSE		sp|Q8R0F5|RBMX2_MOUSE RNA-binding motif protein, X-linked 2 OS=Mus musculus OX=10090 GN=Rbmx2 PE=1 SV=1	67.581	true	2	1	0	6.75	37536	16	2	2	2	2	2	2	2	1	1	2	2	2	1		2	1	0	0	0	1	0	1	0	0	0	520118	263893	165166	484244	439728	304143		309820	146735	63345.2	28182.5
451414	HTRA2_MOUSE	Htra2	HTRA2_MOUSE		sp|Q9JIY5|HTRA2_MOUSE Serine protease HTRA2, mitochondrial OS=Mus musculus OX=10090 GN=Htra2 PE=1 SV=2	33.341	true	2	1	0	2.84	49348	24	1	1	1	1	1	1	1			1		1					0	0	0	0	1	0	0	0	0			113353		220128					12446.4	12408.4
450865	HNRPM_MOUSE	Hnrnpm	HNRPM_MOUSE	PLVAP_MOUSE	sp|Q9D0E1|HNRPM_MOUSE Heterogeneous nuclear ribonucleoprotein M OS=Mus musculus OX=10090 GN=Hnrnpm PE=1 SV=3	624.844	true	2	1	1	25.24	77649	55	18	18	19	19	35	35	19	11	10	12	9	14	11	3	14	14	4	1	3	2	7	3	1	6	8	4.05297e+06	3.73511e+06	3.98616e+06	6411918	20570304	5693054	537136	27950140	3513864	3.08131e+06	2.65976e+06
450817	RL24_MOUSE	Rpl24	RL24_MOUSE		sp|Q8BP67|RL24_MOUSE 60S ribosomal protein L24 OS=Mus musculus OX=10090 GN=Rpl24 PE=1 SV=2	136.653	true	2	1	0	19.11	17778	8	3	3	4	4	12	12	4	2	2	3	1	1	3	1	2	2	1	1	1	1	1	2	1	2	2	2.23296e+06	3654889	2175424	1.64884e+06	754270	2744757	1.83242e+06	2.56185e+06	7976848	885113	448868
450947	ATPD_MOUSE	Atp5f1d	ATPD_MOUSE		sp|Q9D3D9|ATPD_MOUSE ATP synthase subunit delta, mitochondrial OS=Mus musculus OX=10090 GN=Atp5f1d PE=1 SV=1	37.357	true	2	1	0	5.36	17600	7	1	1	1	1	1	1	1	1	1			1			1	1	0	0	0	0	0	0	0	1	0	188931	194009			165386			2986737	29395.9	188931	120400
451667	SHIP1_MOUSE	Inpp5d	SHIP1_MOUSE		sp|Q9ES52|SHIP1_MOUSE Phosphatidylinositol 3,4,5-trisphosphate 5-phosphatase 1 OS=Mus musculus OX=10090 GN=Inpp5d PE=1 SV=2	28.677	true	2	1	0	2.02	133542	82	2	2	2	2	2	2	2			2		2	2		2	1	0	0	0	0	1	1	0	0	0			298504		736532	215886		467843	9810.7	12446.4	12408.4
451116	DCTN5_MOUSE	Dctn5	DCTN5_MOUSE		sp|Q9QZB9|DCTN5_MOUSE Dynactin subunit 5 OS=Mus musculus OX=10090 GN=Dctn5 PE=1 SV=1	26.085	true	2	1	0	6.04	20141	7	1	1	1	1	1	1	1		1		1	1			1		0	0	0	0	0	0	0	1	0		163237		93737.8	391876			365440		12446.4	101303
451156	AP3B1_MOUSE	Ap3b1	AP3B1_MOUSE	AP3B2_MOUSE	sp|Q9Z1T1|AP3B1_MOUSE AP-3 complex subunit beta-1 OS=Mus musculus OX=10090 GN=Ap3b1 PE=1 SV=2	169.993	true	2	1	1	4.8	122740	64	5	5	5	5	6	6	5	1	3	4	2	5	2		5	1	0	0	0	0	3	0	0	3	0	66809.5	307663	396923	76061.2	969480	134145		3636081	18063	9045.71	160530
451603	RL13_MOUSE	Rpl13	RL13_MOUSE		sp|P47963|RL13_MOUSE 60S ribosomal protein L13 OS=Mus musculus OX=10090 GN=Rpl13 PE=1 SV=3	218.893	true	2	1	0	27.01	24305	13	6	6	6	6	23	23	5	2	3	4	4	4	4	2	4	3	1	2	1	4	4	2	1	1	6	15174846	11144713	21117542	14663104	16050910	11846082	777661	14632212	14222476	2.99171e+06	4.4007e+06
451527	CDC73_MOUSE	Cdc73	CDC73_MOUSE		sp|Q8JZM7|CDC73_MOUSE Parafibromin OS=Mus musculus OX=10090 GN=Cdc73 PE=1 SV=1	23.047	true	2	1	0	1.69	60576	36	1	1	1	1	1	1	1	1	1	1		1	1		1	1	0	0	0	0	1	0	0	0	0	21389.2	106266	63694.9		239158	47120		268526	42954.3	21389.2	65947.5
450544	K2C75_MOUSE	Krt75	K2C75_MOUSE	KRT84_MOUSE	sp|Q8BGZ7|K2C75_MOUSE Keratin, type II cytoskeletal 75 OS=Mus musculus OX=10090 GN=Krt75 PE=1 SV=1	721.979	true	2	1	1	22.87	59741	36	19	3	21	4	173	23	4	2	2	1	2	1	1	2	1	1	2	9	2	4	1	0	0	4	1	511351616	1271675008	132404440	116692616	127320176	199840640	129221448	223439200	28959830	3.12831e+06	3816442
451117	ACTY_MOUSE	Actr1b	ACTY_MOUSE; ACTZ_MOUSE		sp|Q8R5C5|ACTY_MOUSE Beta-centractin OS=Mus musculus OX=10090 GN=Actr1b PE=1 SV=1	21.822	true	2	2	0	2.66	42281	23	1	1	1	1	1	1	1	1	1	1	1	1	1	1	1	1	0	0	0	0	1	0	0	0	0	604099	439616	175422	276736	1.23014e+06	307762	18370.7	4.77867e+06	161443	604099	272821
451550	MAT2B_MOUSE	Mat2b	MAT2B_MOUSE		sp|Q99LB6|MAT2B_MOUSE Methionine adenosyltransferase 2 subunit beta OS=Mus musculus OX=10090 GN=Mat2b PE=1 SV=1	38.535	true	2	1	0	3.89	37392	18	1	1	1	1	1	1	1		1	1		1			1		0	0	0	0	0	0	0	1	0		81160.3	130996		230724			789116		12446.4	50367.1
450973	RL36A_MOUSE	Rpl36a	RL36A_MOUSE		sp|P83882|RL36A_MOUSE 60S ribosomal protein L36a OS=Mus musculus OX=10090 GN=Rpl36a PE=3 SV=2	53.553	true	2	1	0	22.64	12440	6	3	3	3	3	3	3	3	2	2	1	3	2	2	1	2	3	2	0	0	0	0	0	0	0	1	5714855	1.51831e+06	27872.7	6.02035e+06	2.61242e+06	5.33321e+06	4046.42	2.26857e+06	8053890	7199259	1.18548e+06
451188	PLP2_MOUSE	Plp2	PLP2_MOUSE		sp|Q9R1Q7|PLP2_MOUSE Proteolipid protein 2 OS=Mus musculus OX=10090 GN=Plp2 PE=1 SV=1	39.481	true	2	1	0	7.89	16608	6	1	1	1	1	1	1	1	1	1	1	1	1	1	1	1	1	0	0	0	0	0	0	0	1	0	140325	1.01033e+06	693184	283460	2.36362e+06	495437	69671	743529	563661	140325	627000
450977	ABD12_MOUSE	Abhd12	ABD12_MOUSE		sp|Q99LR1|ABD12_MOUSE Lysophosphatidylserine lipase ABHD12 OS=Mus musculus OX=10090 GN=Abhd12 PE=1 SV=2	22.169	true	2	1	0	2.01	45270	20	1	1	1	1	1	1	1	1		1		1	1		1		0	0	0	0	0	0	0	1	0	85268.4		81966.4		205161	50051.8		819016		85268.4	12408.4
452066	IRF8_MOUSE	Irf8	IRF8_MOUSE		sp|P23611|IRF8_MOUSE Interferon regulatory factor 8 OS=Mus musculus OX=10090 GN=Irf8 PE=1 SV=1	21.641	true	2	1	0	2.59	48237	25	1	1	1	1	1	1	1			1	1	1					0	0	0	0	1	0	0	0	0			120634	61170.3	240410					12446.4	12408.4
452058	ELNE_MOUSE	Elane	ELNE_MOUSE		sp|Q3UP87|ELNE_MOUSE Neutrophil elastase OS=Mus musculus OX=10090 GN=Elane PE=1 SV=1	67.565	true	2	1	0	7.17	28648	12	2	2	2	2	6	6	2	2	1	2	1	2	2	1	2	2	1	0	1	1	0	0	0	1	2	3.21379e+06	4.33326e+06	7550961	959593	10310106	3473254	3211.99	19900492	2.05939e+06	1.46397e+06	49750.4
451965	SOAT1_MOUSE	Soat1	SOAT1_MOUSE		sp|Q61263|SOAT1_MOUSE Sterol O-acyltransferase 1 OS=Mus musculus OX=10090 GN=Soat1 PE=1 SV=2	23.282	true	2	1	0	1.67	63799	25	1	1	1	1	1	1	1			1		1	1		1		0	0	0	0	1	0	0	0	0			89236.4		219934	82352.3		129223		12446.4	12408.4
451392	PSA6_MOUSE	Psma6	PSA6_MOUSE		sp|Q9QUM9|PSA6_MOUSE Proteasome subunit alpha type-6 OS=Mus musculus OX=10090 GN=Psma6 PE=1 SV=1	233.438	true	2	1	0	25.2	27372	17	6	6	6	6	17	17	6	4	2	4	2	4	4	2	6	3	3	1	1	1	4	1	1	3	2	6.36464e+06	4802460	4012034	1.56123e+06	8943547	2.81338e+06	541746	23297342	2534071	5228197	224530
450643	BDH_MOUSE	Bdh1	BDH_MOUSE		sp|Q80XN0|BDH_MOUSE D-beta-hydroxybutyrate dehydrogenase, mitochondrial OS=Mus musculus OX=10090 GN=Bdh1 PE=1 SV=2	27.894	true	2	1	0	2.92	38298	22	1	1	1	1	1	1	1			1	1		1		1		0	0	0	0	0	0	0	1	0			125293	124474		85228.6		179003		12446.4	12408.4
450635	VAT1_MOUSE	Vat1	VAT1_MOUSE		sp|Q62465|VAT1_MOUSE Synaptic vesicle membrane protein VAT-1 homolog OS=Mus musculus OX=10090 GN=Vat1 PE=1 SV=3	83.019	true	2	1	0	5.91	43097	19	2	2	2	2	3	3	2	1	1	1	1	1	1		2	1	0	0	1	0	0	0	0	2	0	228000	200086	201493	96272.2	525544	199451		6214422	9981.74	95414.9	52887.4
451390	SEPT7_MOUSE	Septin7	SEPT7_MOUSE		sp|O55131|SEPT7_MOUSE Septin-7 OS=Mus musculus OX=10090 GN=Septin7 PE=1 SV=1	40.822	true	2	1	0	2.29	50550	27	1	1	1	1	1	1	1		1	1	1	1			1		0	0	0	0	0	0	0	1	0		166341	173281	151214	700399			2.03141e+06		12446.4	103229
450994	ADRO_MOUSE	Fdxr	ADRO_MOUSE		sp|Q61578|ADRO_MOUSE NADPH:adrenodoxin oxidoreductase, mitochondrial OS=Mus musculus OX=10090 GN=Fdxr PE=1 SV=1	10.635	true	2	1	0	1.42	54201	32	1	1	1	1	1	1	1	1	1	1		1			1		0	0	0	0	0	0	0	1	0	40353.8	47719.3	40852.3		138804			444787		40353.8	29614
451970	B4GT1_MOUSE	B4galt1	B4GT1_MOUSE		sp|P15535|B4GT1_MOUSE Beta-1,4-galactosyltransferase 1 OS=Mus musculus OX=10090 GN=B4galt1 PE=1 SV=1	33.013	true	2	1	0	2.01	44410	22	1	1	1	1	2	2	1		1		1	1	1		1		0	0	0	1	0	0	0	1	0		94814.6		306543	409781	165462		193730		12446.4	58840.8
451008	FACE1_MOUSE	Zmpste24	FACE1_MOUSE		sp|Q80W54|FACE1_MOUSE CAAX prenyl protease 1 homolog OS=Mus musculus OX=10090 GN=Zmpste24 PE=1 SV=2	8.164	true	2	1	0	1.68	54735	21	1	1	1	1	1	1	1		1	1		1	1		1		0	0	0	0	1	0	0	0	0		94983.8	135648		276483	68485.6		891803		12446.4	58945.8
450811	MYO1F_MOUSE	Myo1f	MYO1F_MOUSE		sp|P70248|MYO1F_MOUSE Unconventional myosin-If OS=Mus musculus OX=10090 GN=Myo1f PE=1 SV=1	165.503	true	2	1	0	4.82	125947	62	5	2	5	2	7	3	2	2		1	2	2	1	1	1	1	1	0	0	0	1	0	0	1	0	1.39877e+06	471471	1.4028e+06	1.1186e+06	2.77331e+06	1.48684e+06	10610.5	2.945e+06	160503	995890	12408.4
451439	LASP1_MOUSE	Lasp1	LASP1_MOUSE		sp|Q61792|LASP1_MOUSE LIM and SH3 domain protein 1 OS=Mus musculus OX=10090 GN=Lasp1 PE=1 SV=1	103.435	true	2	1	0	10.27	29994	16	3	3	3	3	5	5	3	1	2	3	1	3	2	1	3	3	0	0	0	0	2	1	0	2	0	737082	843960	1219246	518985	3.73495e+06	867129	9415.58	1.9387e+06	697506	39558	500307
451551	LSM2_MOUSE	Lsm2	LSM2_MOUSE		sp|O35900|LSM2_MOUSE U6 snRNA-associated Sm-like protein LSm2 OS=Mus musculus OX=10090 GN=Lsm2 PE=1 SV=1	35	true	2	1	0	20	10834	7	1	1	1	1	1	1	1		1	1		1	1		1		0	0	0	0	0	0	0	1	0		82895.7	72103.5		108989	45388.4		406787		12446.4	51444.1
451364	NSUN2_MOUSE	Nsun2	NSUN2_MOUSE		sp|Q1HFZ0|NSUN2_MOUSE RNA cytosine C(5)-methyltransferase NSUN2 OS=Mus musculus OX=10090 GN=Nsun2 PE=1 SV=2	20.639	true	2	1	0	1.06	85452	46	1	1	1	1	1	1	1		1	1	1	1	1	1	1		0	0	0	0	1	0	0	0	0		99433	105221	26497.8	201006	91717.1	23027	117474		12446.4	61707
450615	TNPO1_MOUSE	Tnpo1	TNPO1_MOUSE; TNPO2_MOUSE		sp|Q8BFY9|TNPO1_MOUSE Transportin-1 OS=Mus musculus OX=10090 GN=Tnpo1 PE=1 SV=2	28.766	true	2	2	0	1.34	102357	45	1	1	1	1	1	1	1		1	1					1		0	0	0	0	0	0	0	1	0		152013	77312.9					782924		12446.4	94337.4
450522	UB2D3_MOUSE	Ube2d3	UB2D3_MOUSE	U2D2B_MOUSE; UB2D2_MOUSE	sp|P61079|UB2D3_MOUSE Ubiquitin-conjugating enzyme E2 D3 OS=Mus musculus OX=10090 GN=Ube2d3 PE=1 SV=1	52.048	true	2	1	2	12.24	16687	5	2	2	2	2	2	2	2	2	2	2	1	2	2	1	1	1	0	0	0	0	0	0	0	1	1	125982	197607	829492	10696.7	2.46495e+06	603589	5509.19	1.1346e+06	317938	125177	110393
450725	WWP1_MOUSE	Wwp1	WWP1_MOUSE		sp|Q8BZZ3|WWP1_MOUSE NEDD4-like E3 ubiquitin-protein ligase WWP1 OS=Mus musculus OX=10090 GN=Wwp1 PE=1 SV=2	93.939	true	2	1	0	3.16	104694	58	3	2	3	2	7	5	2	2	1	1	2	2	1		2		1	1	0	0	2	0	0	1	0	821359	824752	541773	336430	3.6934e+06	288148		2.91154e+06		320674	31810.5
451683	VATD_MOUSE	Atp6v1d	VATD_MOUSE		sp|P57746|VATD_MOUSE V-type proton ATPase subunit D OS=Mus musculus OX=10090 GN=Atp6v1d PE=1 SV=1	54.65	true	2	1	0	11.34	28369	14	3	3	3	3	4	4	3	1	2	3	1	3	3		3	1	0	0	1	0	1	0	0	2	0	61927.6	281486	383855	206096	1.04385e+06	360850		4.15402e+06	61349.1	14317.4	144655
451030	LEG9_MOUSE	Lgals9	LEG9_MOUSE		sp|O08573|LEG9_MOUSE Galectin-9 OS=Mus musculus OX=10090 GN=Lgals9 PE=1 SV=1	37.694	true	2	1	0	2.27	40036	16	1	1	1	1	4	4	1	1		1	1	1	1		1	1	0	0	1	0	0	1	0	1	1	238021		307663	324735	611054	390083		855917	118108	238021	12408.4
451629	HYOU1_MOUSE	Hyou1	HYOU1_MOUSE		sp|Q9JKR6|HYOU1_MOUSE Hypoxia up-regulated protein 1 OS=Mus musculus OX=10090 GN=Hyou1 PE=1 SV=1	56.249	true	2	1	0	3.7	111181	55	3	3	3	3	4	4	3		2	3		2	2	1	3	1	0	1	2	0	1	0	0	0	0		1.66255e+06	1.45944e+06		1.75338e+06	1.23079e+06	3828.99	2.66932e+06	472167	12446.4	967154
451727	PAI2_MOUSE	Serpinb2	PAI2_MOUSE		sp|P12388|PAI2_MOUSE Plasminogen activator inhibitor 2, macrophage OS=Mus musculus OX=10090 GN=Serpinb2 PE=1 SV=1	47.703	true	2	1	0	2.17	46292	19	1	1	1	1	1	1	1	1	1	1	1	1	1	1	1	1	0	0	0	0	0	0	0	1	0	37219.3	465554	158649	198534	227489	253117	4782.17	1.91254e+06	79493.1	37219.3	288917
451504	PROF1_MOUSE	Pfn1	PROF1_MOUSE		sp|P62962|PROF1_MOUSE Profilin-1 OS=Mus musculus OX=10090 GN=Pfn1 PE=1 SV=2	203.692	true	2	1	0	39.29	14957	9	5	5	6	6	15	15	6	3	4	5	2	6	5		6	3	0	1	0	1	3	1	0	6	3	1.71921e+06	3.32451e+06	6222198	327550	24367578	5388236		26832856	4.12301e+06	355655	507489
450854	SRRM2_MOUSE	Srrm2	SRRM2_MOUSE		sp|Q8BTI8|SRRM2_MOUSE Serine/arginine repetitive matrix protein 2 OS=Mus musculus OX=10090 GN=Srrm2 PE=1 SV=3	30.313	true	2	1	0	0.3	294840	160	1	1	1	1	2	2	1			1		1	1		1	1	0	0	0	0	1	1	0	0	0			377687		520837	633075		173050	37070.5	12446.4	12408.4
451852	VP26A_MOUSE	Vps26a	VP26A_MOUSE		sp|P40336|VP26A_MOUSE Vacuolar protein sorting-associated protein 26A OS=Mus musculus OX=10090 GN=Vps26a PE=1 SV=1	41.856	true	2	1	0	6.12	38114	23	2	2	2	2	2	2	2	1	2	1		2	1		2		0	1	0	0	0	0	0	1	0	414116	676784	206132		732440	201841		2.74493e+06		40732.5	394835
451876	PNPO_MOUSE	Pnpo	PNPO_MOUSE		sp|Q91XF0|PNPO_MOUSE Pyridoxine-5'-phosphate oxidase OS=Mus musculus OX=10090 GN=Pnpo PE=1 SV=1	26.188	true	2	1	0	3.07	30113	14	1	1	1	1	1	1	1			1		1			1		0	0	0	0	1	0	0	0	0			91326		207732			117300		12446.4	12408.4
450541	K22O_MOUSE	Krt76	K22O_MOUSE	KRT84_MOUSE	sp|Q3UV17|K22O_MOUSE Keratin, type II cytoskeletal 2 oral OS=Mus musculus OX=10090 GN=Krt76 PE=1 SV=1	547.771	true	2	1	1	13.13	62845	40	13	2	15	2	127	44	2	2	1	1	2	2	2	1	1	1	3	4	3	7	2	4	9	2	10	2009353600	396115520	531889280	1061440896	1090871168	49792380	939778240	137351568	27372096	1604492928	4.64982e+06
451643	MK67I_MOUSE	Nifk	MK67I_MOUSE		sp|Q91VE6|MK67I_MOUSE MKI67 FHA domain-interacting nucleolar phosphoprotein OS=Mus musculus OX=10090 GN=Nifk PE=1 SV=1	20.553	true	2	1	0	2.52	36265	20	1	1	1	1	1	1	1			1			1		1	1	0	0	0	0	0	1	0	0	0			68259.5			137237		135484	8506.87	12446.4	12408.4
450758	ETHE1_MOUSE	Ethe1	ETHE1_MOUSE		sp|Q9DCM0|ETHE1_MOUSE Persulfide dioxygenase ETHE1, mitochondrial OS=Mus musculus OX=10090 GN=Ethe1 PE=1 SV=2	27.265	true	2	1	0	5.51	27739	18	1	1	1	1	1	1	1		1			1	1		1		0	0	0	0	1	0	0	0	0		224187			399550	177337		421254		12446.4	139128
451809	SYNJ1_MOUSE	Synj1	SYNJ1_MOUSE		sp|Q8CHC4|SYNJ1_MOUSE Synaptojanin-1 OS=Mus musculus OX=10090 GN=Synj1 PE=1 SV=3	24.42	true	2	1	0	0.51	172617	101	1	1	1	1	1	1	1		1			1			1		0	0	0	0	1	0	0	0	0		71171.4			120430			131413		12446.4	44168.2
451596	HCDH_MOUSE	Hadh	HCDH_MOUSE		sp|Q61425|HCDH_MOUSE Hydroxyacyl-coenzyme A dehydrogenase, mitochondrial OS=Mus musculus OX=10090 GN=Hadh PE=1 SV=2	31.034	true	2	1	0	2.55	34464	19	1	1	1	1	2	2	1	1	1	1	1	1	1		1	1	0	0	1	0	1	0	0	0	0	94931.1	140476	246811	106900	497416	201063		1.17737e+06	185887	94931.1	87177.6
450685	PCNA_MOUSE	Pcna	PCNA_MOUSE		sp|P17918|PCNA_MOUSE Proliferating cell nuclear antigen OS=Mus musculus OX=10090 GN=Pcna PE=1 SV=2	90.835	true	2	1	0	9.96	28785	18	3	3	3	3	3	3	3	1	2	3	1	2	3	1	3	2	0	0	0	0	0	0	0	3	0	555710	599257	1.69768e+06	447330	2.70643e+06	1.26729e+06	8545.78	4176653	410312	52705	457345
451200	NSF_MOUSE	Nsf	NSF_MOUSE	SMCE1_MOUSE	sp|P46460|NSF_MOUSE Vesicle-fusing ATPase OS=Mus musculus OX=10090 GN=Nsf PE=1 SV=2	125.603	true	2	1	1	5.11	82613	55	4	4	4	4	6	6	4	3	3	4	2	4	2		4	3	0	0	0	0	2	0	0	4	0	305308	443306	525789	124754	1.91928e+06	342139		6.03182e+06	221988	230351	193372
450803	THOC3_MOUSE	Thoc3	THOC3_MOUSE		sp|Q8VE80|THOC3_MOUSE THO complex subunit 3 OS=Mus musculus OX=10090 GN=Thoc3 PE=2 SV=1	37.672	true	2	1	0	2.56	38738	20	1	1	1	1	1	1	1		1	1		1	1		1		0	0	0	0	1	0	0	0	0		69338.6	71666.5		195041	85007.8		305545		12446.4	43030.8
450513	H12_MOUSE	H1-2	H12_MOUSE	H1T_MOUSE	sp|P15864|H12_MOUSE Histone H1.2 OS=Mus musculus OX=10090 GN=H1-2 PE=1 SV=2	660.857	true	2	1	1	44.34	21267	11	16	3	16	3	96	9	3	1	1	2	1	2	2		2	1	1	1	1	1	2	0	0	2	1	133462264	252163360	115277184	86434416	756190336	198634432	183843488	1616059264	111987120	1.12233e+06	63949.2
450631	TP8L2_MOUSE	Tnfaip8l2	TP8L2_MOUSE		sp|Q9D8Y7|TP8L2_MOUSE Tumor necrosis factor alpha-induced protein 8-like protein 2 OS=Mus musculus OX=10090 GN=Tnfaip8l2 PE=1 SV=1	19.821	true	2	1	0	4.35	20615	11	1	1	1	1	1	1	1		1	1		1	1		1	1	0	0	0	0	1	0	0	0	0		248138	364990		1.06081e+06	308008		430573	168229	12446.4	153991
451254	RTN3_MOUSE	Rtn3	RTN3_MOUSE		sp|Q9ES97|RTN3_MOUSE Reticulon-3 OS=Mus musculus OX=10090 GN=Rtn3 PE=1 SV=2	58.692	true	2	1	0	1.97	103879	46	2	2	2	2	3	3	2	1	2	2	1	2	1	1	2		1	0	0	1	1	0	0	0	0	2.07115e+06	634631	789085	1.16733e+06	2.0048e+06	506494	6085.2	7.81334e+06		43231.3	394292
450537	K2C71_MOUSE	Krt71	K2C71_MOUSE	K2C74_MOUSE	sp|Q9R0H5|K2C71_MOUSE Keratin, type II cytoskeletal 71 OS=Mus musculus OX=10090 GN=Krt71 PE=1 SV=1	308.85	true	2	1	1	11.83	57383	36	8	2	8	2	52	2	2	1	1	2	2	1		1	1	2	0	0	1	1	0	0	0	0	0	265542272	213578432	95091520	50693232	140161264	138758128	230951888	222773360	36337312	9942.01	33203
451922	PTGR1_MOUSE	Ptgr1	PTGR1_MOUSE		sp|Q91YR9|PTGR1_MOUSE Prostaglandin reductase 1 OS=Mus musculus OX=10090 GN=Ptgr1 PE=1 SV=2	52.408	true	2	1	0	4.86	35560	20	2	2	2	2	4	4	2	2	1	2	2	2			2		0	0	0	0	3	0	0	1	0	181353	117287	257154	96992.8	1.5565e+06			1451907		122440	10201.9
451032	TXND5_MOUSE	Txndc5	TXND5_MOUSE		sp|Q91W90|TXND5_MOUSE Thioredoxin domain-containing protein 5 OS=Mus musculus OX=10090 GN=Txndc5 PE=1 SV=2	26.75	true	2	1	0	2.16	46415	22	1	1	1	1	1	1	1			1		1			1		0	0	0	0	1	0	0	0	0			133393		427914			157328		12446.4	12408.4
450936	FA98A_MOUSE	Fam98a	FA98A_MOUSE		sp|Q3TJZ6|FA98A_MOUSE Protein FAM98A OS=Mus musculus OX=10090 GN=Fam98a PE=1 SV=1	48.781	true	2	1	0	2.91	55054	24	1	1	1	1	1	1	1	1		1		1			1		0	0	0	0	0	0	0	1	0	77375.2		76741.2		78864.3			560225		77375.2	12408.4
450590	ARP19_MOUSE	Arpp19	ARP19_MOUSE		sp|P56212|ARP19_MOUSE cAMP-regulated phosphoprotein 19 OS=Mus musculus OX=10090 GN=Arpp19 PE=1 SV=2	21.945	true	2	1	0	7.14	12292	8	1	1	1	1	1	1	1	1	1	1		1		1	1	1	0	0	0	0	0	0	0	1	0	217706	57547	253580		1.23297e+06		12195.9	706236	87614.8	217706	35713
451049	KPRB_MOUSE	Prpsap2	KPRB_MOUSE	KPRA_MOUSE	sp|Q8R574|KPRB_MOUSE Phosphoribosyl pyrophosphate synthase-associated protein 2 OS=Mus musculus OX=10090 GN=Prpsap2 PE=1 SV=1	55.394	true	2	1	1	5.96	40881	26	2	2	2	2	2	2	2	2	1	2	2	2	2	1	2	1	0	0	0	0	1	0	0	1	0	306632	210741	382655	166116	1.08565e+06	373616	3769.65	1.25324e+06	168796	256877	21488.8
451428	IGHG3_MOUSE		IGHG3_MOUSE		sp|P03987|IGHG3_MOUSE Ig gamma-3 chain C region OS=Mus musculus OX=10090 PE=1 SV=2	66.157	true	2	1	0	5.28	43929	18	2	2	2	2	2	2	2	2	2	2	1	2	2	1	2	1	1	0	0	0	1	0	0	0	0	1.53176e+06	1.88865e+06	871082	179320	2302314	2.39917e+06	20699.9	2.9318e+06	197714	816570	816362
451578	EVL_MOUSE	Evl	EVL_MOUSE		sp|P70429|EVL_MOUSE Ena/VASP-like protein OS=Mus musculus OX=10090 GN=Evl PE=1 SV=2	27.472	true	2	1	0	4.59	44337	24	1	1	1	1	1	1	1	1		1		1		1	1		0	0	0	0	1	0	0	0	0	69609.5		105455		184799		17124.6	152363		69609.5	12408.4
451792	GAPR1_MOUSE	Glipr2	GAPR1_MOUSE		sp|Q9CYL5|GAPR1_MOUSE Golgi-associated plant pathogenesis-related protein 1 OS=Mus musculus OX=10090 GN=Glipr2 PE=1 SV=3	77.931	true	2	1	0	16.88	17090	10	2	2	2	2	5	5	2	1	2	2	1	2	2		2	2	0	1	1	0	1	0	0	2	0	405583	969312	751104	255498	952785	158002		1318617	476543	24505.6	622863
451705	MORC3_MOUSE	Morc3	MORC3_MOUSE		sp|F7BJB9|MORC3_MOUSE MORC family CW-type zinc finger protein 3 OS=Mus musculus OX=10090 GN=Morc3 PE=1 SV=1	43.184	true	2	1	0	1.17	106521	56	1	1	1	1	1	1	1		1	1		1	1			1	0	0	0	0	1	0	0	0	0		75144.6	95225.3		226561	59366.3			30398.6	12446.4	46633.9
451710	NPM_MOUSE	Npm1	NPM_MOUSE		sp|Q61937|NPM_MOUSE Nucleophosmin OS=Mus musculus OX=10090 GN=Npm1 PE=1 SV=1	199.98	true	2	1	0	17.12	32560	16	5	5	6	6	16	16	6	3	3	4	3	4	4	2	6	4	1	1	2	1	1	2	1	5	2	6523125	6941207	10553964	4.84228e+06	16439151	8533606	340009	46059792	4.34589e+06	2.97482e+06	2.27893e+06
450583	PSMD6_MOUSE	Psmd6	PSMD6_MOUSE		sp|Q99JI4|PSMD6_MOUSE 26S proteasome non-ATPase regulatory subunit 6 OS=Mus musculus OX=10090 GN=Psmd6 PE=1 SV=1	144.818	true	2	1	0	12.85	45536	29	4	4	4	4	4	4	4		2	2	1	3	3		4	1	0	0	0	0	0	0	0	4	0		338315	325312	9912.67	756796	279586		6047311	9553.19	12446.4	190220
451729	BCLF1_MOUSE	Bclaf1	BCLF1_MOUSE		sp|Q8K019|BCLF1_MOUSE Bcl-2-associated transcription factor 1 OS=Mus musculus OX=10090 GN=Bclaf1 PE=1 SV=2	25.646	true	2	1	0	0.98	106002	49	1	1	1	1	1	1	1		1	1	1	1	1	1	1	1	0	0	0	0	1	0	0	0	0		365759	335304	327932	813076	379353	5247.89	365236	179931	12446.4	226986
450721	1433S_MOUSE	Sfn	1433S_MOUSE		sp|O70456|1433S_MOUSE 14-3-3 protein sigma OS=Mus musculus OX=10090 GN=Sfn PE=1 SV=2	675.528	true	2	1	0	38.31	27706	19	12	9	16	13	33	27	12	9	6	6	4	7	6	2	12	4	3	3	1	1	3	1	0	14	0	11581572	16050911	9338455	2706385	30088154	8.14214e+06	499133	620608064	4.91135e+06	9753870	1.80046e+06
451478	ALRF2_MOUSE	Alyref2	ALRF2_MOUSE; THOC4_MOUSE		sp|Q9JJW6|ALRF2_MOUSE Aly/REF export factor 2 OS=Mus musculus OX=10090 GN=Alyref2 PE=1 SV=1	33.247	true	2	2	0	5.05	23730	11	1	1	1	1	5	5	1		1	1	1	1	1		1	1	0	1	0	1	1	0	0	1	1		2823703	2.06747e+06	331120	4.30621e+06	2.20922e+06		3.1703e+06	1.32223e+06	12446.4	1.75236e+06
450526	H2AX_MOUSE	H2ax	H2AX_MOUSE	H2A2B_MOUSE	sp|P27661|H2AX_MOUSE Histone H2AX OS=Mus musculus OX=10090 GN=H2ax PE=1 SV=2	101.607	true	2	1	1	22.38	15143	9	4	1	4	1	33	1	1					1			1		0	0	0	0	1	0	0	0	0	338566720	418050080	77063096	48645968	642861824	100962816	121875264	1363412480	2.6766e+06	12446.4	12408.4
450999	RL21_MOUSE	Rpl21	RL21_MOUSE		sp|O09167|RL21_MOUSE 60S ribosomal protein L21 OS=Mus musculus OX=10090 GN=Rpl21 PE=1 SV=3	101.045	true	2	1	0	18.75	18562	8	3	3	3	3	12	12	3	2	2	2	3	2	1		2	2	1	1	2	3	2	1	0	1	1	12490285	1374101	7326765	5.57374e+06	6399610	1.29191e+06		1470873	6.35722e+06	31095.7	279645
450662	SMC2_MOUSE	Smc2	SMC2_MOUSE		sp|Q8CG48|SMC2_MOUSE Structural maintenance of chromosomes protein 2 OS=Mus musculus OX=10090 GN=Smc2 PE=1 SV=2	116.97	true	2	1	0	2.35	134239	76	3	3	3	3	3	3	3	1	3	3	2	3	3		3	2	0	0	0	0	3	0	0	0	0	243623	598399	840518	144270	2.20586e+06	646087		1.42472e+06	249514	11182.5	477571
451151	ERH_MOUSE	Erh	ERH_MOUSE		sp|P84089|ERH_MOUSE Enhancer of rudimentary homolog OS=Mus musculus OX=10090 GN=Erh PE=1 SV=1	45.5	true	2	1	0	10.58	12258	6	1	1	1	1	1	1	1		1	1		1	1		1		0	0	0	0	0	0	0	1	0		299926	384504		1.07189e+06	139170		6180461		12446.4	186131
451928	THIM_MOUSE	Acaa2	THIM_MOUSE		sp|Q8BWT1|THIM_MOUSE 3-ketoacyl-CoA thiolase, mitochondrial OS=Mus musculus OX=10090 GN=Acaa2 PE=1 SV=3	82.604	true	2	1	0	10.33	41830	25	3	3	3	3	4	4	3	3		1	1	2	2		2	1	1	0	0	0	1	0	0	2	0	439869		328694	1.43062e+06	621306	328522		903210	11052.4	1.41945e+06	12408.4
451222	PPA6_MOUSE	Acp6	PPA6_MOUSE		sp|Q8BP40|PPA6_MOUSE Lysophosphatidic acid phosphatase type 6 OS=Mus musculus OX=10090 GN=Acp6 PE=1 SV=1	30.537	true	2	1	0	1.91	47625	27	1	1	1	1	1	1	1		1			1	1		1		0	0	0	0	1	0	0	0	0		55760.8			151432	59304.2		86457.2		12446.4	34604.5
451370	ADK_MOUSE	Adk	ADK_MOUSE		sp|P55264|ADK_MOUSE Adenosine kinase OS=Mus musculus OX=10090 GN=Adk PE=1 SV=2	66.85	true	2	1	0	3.88	40149	22	1	1	1	1	2	2	1	1	1	1		1	1		1		0	0	0	0	0	0	0	2	0	41135.9	100835	69319.8		245456	164824		1.21634e+06		41135.9	62577
451594	TPIS_MOUSE	Tpi1	TPIS_MOUSE		sp|P17751|TPIS_MOUSE Triosephosphate isomerase OS=Mus musculus OX=10090 GN=Tpi1 PE=1 SV=5	319.517	true	2	1	0	52.21	26712	15	9	9	9	9	16	16	8	1	4	7	1	8	5		7	2	0	2	1	0	4	0	0	8	0	501513	2.82932e+06	5110666	312133	13959391	2.80386e+06		27953852	1273633	43327.1	135249
451486	MAP4_MOUSE	Map4	MAP4_MOUSE		sp|P27546|MAP4_MOUSE Microtubule-associated protein 4 OS=Mus musculus OX=10090 GN=Map4 PE=1 SV=3	27.176	true	2	1	0	2.22	117429	60	2	2	2	2	2	2	2	2	1	1	1	2	1	1	1		1	0	1	0	0	0	0	0	0	341548	175899	185577	146685	1.08476e+06	315237	20901	1.82346e+06		265243	54557.2
450624	NMT1_MOUSE	Nmt1	NMT1_MOUSE; NMT2_MOUSE		sp|O70310|NMT1_MOUSE Glycylpeptide N-tetradecanoyltransferase 1 OS=Mus musculus OX=10090 GN=Nmt1 PE=1 SV=1	12.294	true	2	2	0	1.41	56888	27	1	1	1	1	1	1	1		1	1		1	1		1	1	0	0	0	0	0	0	0	1	0		91264.2	107019		490105	42844.1		612946	10920.6	12446.4	56637.5
451899	LMAN2_MOUSE	Lman2	LMAN2_MOUSE		sp|Q9DBH5|LMAN2_MOUSE Vesicular integral-membrane protein VIP36 OS=Mus musculus OX=10090 GN=Lman2 PE=1 SV=2	67.637	true	2	1	0	6.15	40430	23	2	2	2	2	4	4	2		2	2		2	2		2	1	0	0	0	0	2	0	0	2	0		752354	571265		1625673	363315		1.89549e+06	209643	12446.4	480444
451647	FMNL1_MOUSE	Fmnl1	FMNL1_MOUSE	FMNL2_MOUSE	sp|Q9JL26|FMNL1_MOUSE Formin-like protein 1 OS=Mus musculus OX=10090 GN=Fmnl1 PE=1 SV=1	128.86	true	2	1	1	3.56	122060	66	4	4	4	4	4	4	4	2	2	3	2	4	3		3	3	0	0	0	0	4	0	0	0	0	270538	533279	670373	255684	2.18574e+06	668309		769214	483448	148183	94836.3
451898	AMRP_MOUSE	Lrpap1	AMRP_MOUSE		sp|P55302|AMRP_MOUSE Alpha-2-macroglobulin receptor-associated protein OS=Mus musculus OX=10090 GN=Lrpap1 PE=1 SV=1	26.695	true	2	1	0	3.61	42215	26	1	1	1	1	1	1	1	1		1		1	1		1		0	0	0	0	1	0	0	0	0	27147.8		113529		706294	110056		251127		27147.8	12408.4
451145	IF5_MOUSE	Eif5	IF5_MOUSE		sp|P59325|IF5_MOUSE Eukaryotic translation initiation factor 5 OS=Mus musculus OX=10090 GN=Eif5 PE=1 SV=1	35.421	true	2	1	0	2.33	48968	26	1	1	1	1	1	1	1			1		1	1		1		0	0	0	0	1	0	0	0	0			233981		718782	362447		231790		12446.4	12408.4
452153	RL14_MOUSE	Rpl14	RL14_MOUSE		sp|Q9CR57|RL14_MOUSE 60S ribosomal protein L14 OS=Mus musculus OX=10090 GN=Rpl14 PE=1 SV=3	101.091	true	2	1	0	13.36	23564	12	3	3	3	3	6	6	3	1	2	2	2	1	2	1	1	2	0	1	1	2	1	0	0	0	1	5043111	5606177	4203221	11001420	337506	1.96948e+06	33333	2.87568e+06	8441819	48989.4	1375063
451661	ML12B_MOUSE	Myl12b	ML12B_MOUSE	MYL9_MOUSE	sp|Q3THE2|ML12B_MOUSE Myosin regulatory light chain 12B OS=Mus musculus OX=10090 GN=Myl12b PE=1 SV=2	321.849	true	2	1	1	40.12	19779	11	6	6	8	8	19	19	7	2	6	6	3	7	7		7	5	2	3	1	0	3	4	0	5	0	998214	4.74837e+06	5050076	773237	10558327	5.15904e+06		35007260	548318	60799.8	2.22355e+06
450598	CWC22_MOUSE	Cwc22	CWC22_MOUSE		sp|Q8C5N3|CWC22_MOUSE Pre-mRNA-splicing factor CWC22 homolog OS=Mus musculus OX=10090 GN=Cwc22 PE=1 SV=1	50.152	true	2	1	0	1.87	104772	50	2	2	2	2	2	2	2	2	1			1	2		1	1	0	0	0	0	0	1	0	1	0	83570.7	92793.7			147098	637493		244768	25890.7	53891.2	37162
451694	STK10_MOUSE	Stk10	STK10_MOUSE		sp|O55098|STK10_MOUSE Serine/threonine-protein kinase 10 OS=Mus musculus OX=10090 GN=Stk10 PE=1 SV=2	27.884	true	2	1	0	0.83	111906	53	1	1	1	1	1	1	1	1	1	1	1	1	1		1	1	0	0	0	0	0	0	0	1	0	140195	103326	132115	1.71961e+06	343624	177841		714715	131425	140195	64123.2
451934	CT2NL_MOUSE	Cttnbp2nl	CT2NL_MOUSE		sp|Q99LJ0|CT2NL_MOUSE CTTNBP2 N-terminal-like protein OS=Mus musculus OX=10090 GN=Cttnbp2nl PE=1 SV=1	22.192	true	2	1	0	1.41	69840	42	1	1	1	1	1	1	1	1				1			1		0	0	0	0	0	0	0	1	0	118868				67129.5			256123		118868	12408.4
452038	SP16H_MOUSE	Supt16h	SP16H_MOUSE		sp|Q920B9|SP16H_MOUSE FACT complex subunit SPT16 OS=Mus musculus OX=10090 GN=Supt16h PE=1 SV=2	335.575	true	2	1	0	7.45	119825	63	8	8	8	8	13	13	8	5	4	6	3	8	4	2	8	4	3	0	0	1	3	0	0	5	1	11784113	641369	862468	8720908	6.78348e+06	455736	686625	15316492	214909	4.81944e+06	484618
451598	PDIA6_MOUSE	Pdia6	PDIA6_MOUSE		sp|Q922R8|PDIA6_MOUSE Protein disulfide-isomerase A6 OS=Mus musculus OX=10090 GN=Pdia6 PE=1 SV=3	88.142	true	2	1	0	4.55	48100	25	2	2	2	2	4	4	2		2	1		1	1		2		0	2	0	0	1	1	0	0	0		1.53264e+06	324012		800184	243131		1802192		12446.4	454732
451585	CHM2A_MOUSE	Chmp2a	CHM2A_MOUSE		sp|Q9DB34|CHM2A_MOUSE Charged multivesicular body protein 2a OS=Mus musculus OX=10090 GN=Chmp2a PE=1 SV=1	55.369	true	2	1	0	7.21	25134	12	2	2	2	2	3	3	2	1	2	2	1	2	2		2	2	0	1	2	0	0	0	0	0	0	864572	1.13105e+06	2288969	465596	2472658	592161		3.06711e+06	238772	20365.1	523123
452052	STAM1_MOUSE	Stam	STAM1_MOUSE		sp|P70297|STAM1_MOUSE Signal transducing adapter molecule 1 OS=Mus musculus OX=10090 GN=Stam PE=1 SV=3	24.625	true	2	1	0	1.28	59770	21	1	1	1	1	1	1	1	1	1	1		1	1		1		0	0	0	0	0	0	0	1	0	33817.9	68857.9	31095		121510	30858.5		260936		33817.9	42732.4
450764	RENT1_MOUSE	Upf1	RENT1_MOUSE	DNA2_MOUSE	sp|Q9EPU0|RENT1_MOUSE Regulator of nonsense transcripts 1 OS=Mus musculus OX=10090 GN=Upf1 PE=1 SV=2	667.443	true	2	1	1	17.44	123967	64	19	19	19	19	36	36	19	10	9	12	5	16	18	2	17	9	4	1	1	1	7	6	0	13	2	7146382	1.59193e+06	1.46517e+06	3.93882e+06	28932008	19404174	35739.7	33521516	3.52063e+06	7.50406e+06	707511
451265	RS20_MOUSE	Rps20	RS20_MOUSE		sp|P60867|RS20_MOUSE 40S ribosomal protein S20 OS=Mus musculus OX=10090 GN=Rps20 PE=1 SV=1	130.793	true	2	1	0	22.69	13372	6	3	3	3	3	6	6	3	1	2	3	2	3	3		2	1	0	0	2	1	2	0	0	1	0	241076	4.02028e+06	8291375	4287790	17848198	5615536		23386468	1.41788e+06	36211.4	66469.4
450847	MA2B1_MOUSE	Man2b1	MA2B1_MOUSE		sp|O09159|MA2B1_MOUSE Lysosomal alpha-mannosidase OS=Mus musculus OX=10090 GN=Man2b1 PE=1 SV=4	53.191	true	2	1	0	1.78	114648	49	2	2	2	2	2	2	2		1	1	1	2	1		1	1	0	0	0	0	2	0	0	0	0		160820	246201	72102.4	1.05254e+06	270663		364868	50100.1	12446.4	80054.7
451232	FXR1_MOUSE	Fxr1	FXR1_MOUSE		sp|Q61584|FXR1_MOUSE Fragile X mental retardation syndrome-related protein 1 OS=Mus musculus OX=10090 GN=Fxr1 PE=1 SV=2	147.122	true	2	1	0	4.73	76222	42	4	4	4	4	6	6	4	2	2	4	2	4	3	1	3	3	0	0	0	1	2	2	0	1	0	921917	322058	762607	1.82688e+06	1.44363e+06	1544334	8961.03	919814	325757	374692	51245.8
451424	NAMPT_MOUSE	Nampt	NAMPT_MOUSE		sp|Q99KQ4|NAMPT_MOUSE Nicotinamide phosphoribosyltransferase OS=Mus musculus OX=10090 GN=Nampt PE=1 SV=1	185.034	true	2	1	0	14.26	55447	30	5	5	5	5	5	5	5	2	4	2	1	4	1		5	1	0	0	0	0	0	0	0	5	0	457290	489519	318773	45324.5	1.35338e+06	214602		7240452	11574.9	57747.6	266358
451150	VIGLN_MOUSE	Hdlbp	VIGLN_MOUSE		sp|Q8VDJ3|VIGLN_MOUSE Vigilin OS=Mus musculus OX=10090 GN=Hdlbp PE=1 SV=1	161.196	true	2	1	0	3.15	141743	80	4	4	4	4	4	4	3	2	1	3	2	3	2		3	2	0	0	0	0	0	0	0	3	0	1.09148e+06	373758	761975	585357	1.37813e+06	798187		3.06589e+06	252170	860571	22628.7
451379	STK38_MOUSE	Stk38	STK38_MOUSE		sp|Q91VJ4|STK38_MOUSE Serine/threonine-protein kinase 38 OS=Mus musculus OX=10090 GN=Stk38 PE=1 SV=1	23.75	true	2	1	0	2.15	54173	27	1	1	1	1	1	1	1	1		1	1	1	1		1		0	0	0	0	1	0	0	0	0	74086.7		120125	54379.2	467355	127259		620301		74086.7	12408.4
451374	PSMD4_MOUSE	Psmd4	PSMD4_MOUSE		sp|O35226|PSMD4_MOUSE 26S proteasome non-ATPase regulatory subunit 4 OS=Mus musculus OX=10090 GN=Psmd4 PE=1 SV=1	33.121	true	2	1	0	2.93	40704	15	1	1	1	1	1	1	1	1		1					1		0	0	0	0	0	0	0	1	0	294805		63670.8					1.30588e+06		294805	12408.4
451943	ASSY_MOUSE	Ass1	ASSY_MOUSE		sp|P16460|ASSY_MOUSE Argininosuccinate synthase OS=Mus musculus OX=10090 GN=Ass1 PE=1 SV=1	165.824	true	2	1	0	9.47	46584	25	6	6	6	6	13	13	6	4	2	6	4	4	6	1	6	3	0	1	2	1	4	0	0	4	1	2.04895e+06	4.58666e+06	5420201	2646030	16544620	6.11723e+06	19606.2	10069275	1509648	755833	139000
451341	PR40A_MOUSE	Prpf40a	PR40A_MOUSE		sp|Q9R1C7|PR40A_MOUSE Pre-mRNA-processing factor 40 homolog A OS=Mus musculus OX=10090 GN=Prpf40a PE=1 SV=1	28.503	true	2	1	0	1.05	108481	41	1	1	1	1	1	1	1	1	1	1	1	1	1	1	1	1	0	0	0	0	0	0	0	1	0	472532	473097	464373	581314	735951	623022	41865.9	1.02709e+06	421674	472532	293598
450879	BRD1_MOUSE	Brd1	BRD1_MOUSE		sp|G5E8P1|BRD1_MOUSE Bromodomain-containing protein 1 OS=Mus musculus OX=10090 GN=Brd1 PE=1 SV=1	35.459	true	2	1	0	0.85	119714	62	1	1	1	1	3	3	1	1		1	1	1	1		1	1	1	0	0	1	1	0	0	0	0	337817		68500.6	233220	252072	193134		309621	67510.1	337817	12408.4
450771	MARK1_MOUSE	Mark1	MARK1_MOUSE; MARK2_MOUSE; MARK3_MOUSE; MARK4_MOUSE		sp|Q8VHJ5|MARK1_MOUSE Serine/threonine-protein kinase MARK1 OS=Mus musculus OX=10090 GN=Mark1 PE=1 SV=2	26.265	true	2	4	0	1.13	88333	49	1	1	1	1	1	1	1	1		1		1	1		1		0	0	0	0	0	0	0	1	0	100046		81715.6		192013	79601.6		558026		100046	12408.4
451123	IPYR_MOUSE	Ppa1	IPYR_MOUSE		sp|Q9D819|IPYR_MOUSE Inorganic pyrophosphatase OS=Mus musculus OX=10090 GN=Ppa1 PE=1 SV=1	14.981	true	2	1	0	2.77	32667	20	1	1	1	1	1	1	1			1		1			1		0	0	0	0	1	0	0	0	0			198411		510348			167990		12446.4	12408.4
450832	TBB2A_MOUSE	Tubb2a	TBB2A_MOUSE	TBB1_MOUSE; TBB2B_MOUSE	sp|Q7TMM9|TBB2A_MOUSE Tubulin beta-2A chain OS=Mus musculus OX=10090 GN=Tubb2a PE=1 SV=1	507.099	true	2	1	2	23.37	49906	22	9	1	12	1	39	1	1	1	1			1			1		0	0	0	0	0	0	0	1	0	5060767	6698027	6.35038e+06	967418	13057416	5755784		57233436	4.74824e+06	229460	111335
451732	PSMD5_MOUSE	Psmd5	PSMD5_MOUSE		sp|Q8BJY1|PSMD5_MOUSE 26S proteasome non-ATPase regulatory subunit 5 OS=Mus musculus OX=10090 GN=Psmd5 PE=1 SV=4	76.518	true	2	1	0	3.77	55972	30	2	2	2	2	4	4	1		1	1		1	1		1		0	1	0	0	1	0	0	1	0		184017	167202		384933	23942.6		1.29684e+06		12446.4	114199
451104	SEPT8_MOUSE	Septin8	SEPT8_MOUSE	SEP11_MOUSE; SEPT6_MOUSE	sp|Q8CHH9|SEPT8_MOUSE Septin-8 OS=Mus musculus OX=10090 GN=Septin8 PE=1 SV=4	74.542	true	2	1	2	5.59	49812	24	3	3	3	3	3	3	3	2	1	2	1	2	2		3		0	1	0	0	0	0	0	2	0	248315	407028	569861	113633	1.02527e+06	519423		3407897		130137	38549.6
450729	THOC6_MOUSE	Thoc6	THOC6_MOUSE		sp|Q5U4D9|THOC6_MOUSE THO complex subunit 6 homolog OS=Mus musculus OX=10090 GN=Thoc6 PE=1 SV=1	27.65	true	2	1	0	4.11	37314	19	1	1	1	1	1	1	1		1	1	1	1			1	1	0	0	0	0	0	0	0	1	0		64758.8	81566.1	56168.4	187742			198802	14660.4	12446.4	40188.6
451734	AP1G2_MOUSE	Ap1g2	AP1G2_MOUSE		sp|O88512|AP1G2_MOUSE AP-1 complex subunit gamma-like 2 OS=Mus musculus OX=10090 GN=Ap1g2 PE=1 SV=2	33.913	true	2	1	0	1.14	87862	43	1	1	1	1	1	1	1	1	1						1		0	0	0	0	0	0	0	1	0	72733.3	71842						514938		72733.3	44584.3
451882	SNX3_MOUSE	Snx3	SNX3_MOUSE		sp|O70492|SNX3_MOUSE Sorting nexin-3 OS=Mus musculus OX=10090 GN=Snx3 PE=1 SV=3	40.077	true	2	1	0	9.26	18757	11	2	2	2	2	2	2	2	1	1	1	1	2	1	1	1	1	0	0	1	0	1	0	0	0	0	459462	380713	396770	26900.4	1.31797e+06	236064	15270.6	1.37197e+06	21170.7	174509	92038.1
451358	RFC2_MOUSE	Rfc2	RFC2_MOUSE		sp|Q9WUK4|RFC2_MOUSE Replication factor C subunit 2 OS=Mus musculus OX=10090 GN=Rfc2 PE=1 SV=1	32.184	true	2	1	0	2.58	38725	25	1	1	1	1	1	1	1		1	1		1	1		1	1	0	0	0	0	1	0	0	0	0		188996	222361		786923	147266		344545	65847.3	12446.4	117289
451641	DYHC1_MOUSE	Dync1h1	DYHC1_MOUSE		sp|Q9JHU4|DYHC1_MOUSE Cytoplasmic dynein 1 heavy chain 1 OS=Mus musculus OX=10090 GN=Dync1h1 PE=1 SV=2	486.912	true	2	1	0	4.61	532045	287	19	19	19	19	20	20	18	7	8	12	3	12	11	4	18	6	0	2	0	0	1	0	0	15	1	7241511	1873565	3168802	360717	4.85713e+06	1.38429e+06	76961.8	24148002	469619	999150	1.10478e+06
450530	EFHD2_MOUSE	Efhd2	EFHD2_MOUSE	EFHD1_MOUSE	sp|Q9D8Y0|EFHD2_MOUSE EF-hand domain-containing protein D2 OS=Mus musculus OX=10090 GN=Efhd2 PE=1 SV=1	122.044	true	2	1	1	13.33	26791	16	3	3	3	3	5	5	3	1	2	2	1	2	2		2	1	0	1	1	0	0	0	0	1	1	380952	800334	1.65651e+06	334714	2880641	792406		3.38813e+06	131892	17590.3	386050
451371	PLBL1_MOUSE	Plbd1	PLBL1_MOUSE		sp|Q8VCI0|PLBL1_MOUSE Phospholipase B-like 1 OS=Mus musculus OX=10090 GN=Plbd1 PE=1 SV=1	85.284	true	2	1	0	4	62998	28	2	2	2	2	2	2	2		1	1		1	1			1	0	1	0	0	0	0	0	0	1		387158	10765.4		159352	306655			555397	12446.4	654098
452067	EIF1B_MOUSE	Eif1b	EIF1B_MOUSE; EIF1_MOUSE		sp|Q9CXU9|EIF1B_MOUSE Eukaryotic translation initiation factor 1b OS=Mus musculus OX=10090 GN=Eif1b PE=1 SV=2	23.262	true	2	2	0	14.16	12824	5	1	1	1	1	1	1	1		1	1		1	1		1		0	0	0	0	0	0	0	1	0		109745	118187		129198	78050.7		520528		12446.4	68106.3
451808	PRS10_MOUSE	Psmc6	PRS10_MOUSE		sp|P62334|PRS10_MOUSE 26S proteasome regulatory subunit 10B OS=Mus musculus OX=10090 GN=Psmc6 PE=1 SV=1	107.474	true	2	1	0	14.65	44172	26	4	4	4	4	4	4	3	2	3	3	3	3	2		3	1	0	0	1	0	1	0	0	1	0	223500	883110	430816	309976	3.38902e+06	314512		9926734	245612	90598.1	537682
450928	QCR7_MOUSE	Uqcrb	QCR7_MOUSE		sp|Q9D855|QCR7_MOUSE Cytochrome b-c1 complex subunit 7 OS=Mus musculus OX=10090 GN=Uqcrb PE=1 SV=3	24.556	true	2	1	0	9.01	13527	8	1	1	1	1	1	1	1		1	1		1			1		0	0	0	0	0	0	0	1	0		129934	79154.8		355683			408665		12446.4	80635.4
450963	F262_MOUSE	Pfkfb2	F262_MOUSE		sp|P70265|F262_MOUSE 6-phosphofructo-2-kinase/fructose-2,6-bisphosphatase 2 OS=Mus musculus OX=10090 GN=Pfkfb2 PE=1 SV=2	24.669	true	2	1	0	1.54	59924	42	1	1	1	1	1	1	1		1		1	1			1		0	0	0	0	0	0	0	1	0		297167		132254	29270.3			344889		12446.4	184419
452130	CD11B_MOUSE	Cdk11b	CD11B_MOUSE		sp|P24788|CD11B_MOUSE Cyclin-dependent kinase 11B OS=Mus musculus OX=10090 GN=Cdk11b PE=1 SV=2	26.919	true	2	1	0	1.15	91513	44	1	1	1	1	1	1	1		1	1		1	1		1		0	0	0	0	0	0	0	1	0		112132	187138		341721	219651		826899		12446.4	69587.9
451043	MAPK2_MOUSE	Mapkapk2	MAPK2_MOUSE; MAPK3_MOUSE		sp|P49138|MAPK2_MOUSE MAP kinase-activated protein kinase 2 OS=Mus musculus OX=10090 GN=Mapkapk2 PE=1 SV=2	37.906	true	2	2	0	2.07	44050	22	1	1	1	1	2	2	1		1	1		1	1			1	0	0	0	0	1	1	0	0	0		324892	14471.4		805362	205779			13878.6	12446.4	201624
450518	SYAC_MOUSE	Aars1	SYAC_MOUSE		sp|Q8BGQ7|SYAC_MOUSE Alanine--tRNA ligase, cytoplasmic OS=Mus musculus OX=10090 GN=Aars1 PE=1 SV=1	127.944	true	2	1	0	3.41	106909	59	3	3	3	3	4	4	3	3	2	2	2	3	2	1	2	2	0	0	0	0	3	0	0	1	0	275481	386746	357061	139288	1.32581e+06	373822	8908.5	1.72379e+06	222750	232087	212981
451235	SND1_MOUSE	Snd1	SND1_MOUSE		sp|Q78PY7|SND1_MOUSE Staphylococcal nuclease domain-containing protein 1 OS=Mus musculus OX=10090 GN=Snd1 PE=1 SV=1	364.309	true	2	1	0	11.1	102088	62	9	9	10	10	19	19	10	6	3	7	2	9	6	2	9	4	1	3	0	0	6	1	0	7	1	972902	1.14643e+06	2.57002e+06	333937	5955967	1.75517e+06	30506.6	15088924	1077586	848624	126200
451961	NDUS7_MOUSE	Ndufs7	NDUS7_MOUSE		sp|Q9DC70|NDUS7_MOUSE NADH dehydrogenase [ubiquinone] iron-sulfur protein 7, mitochondrial OS=Mus musculus OX=10090 GN=Ndufs7 PE=1 SV=1	39.029	true	2	1	0	4.02	24683	14	1	1	1	1	1	1	1		1		1	1			1		0	0	0	0	1	0	0	0	0		184899		4898.93	679519			211700		12446.4	114746
450877	ILF3_MOUSE	Ilf3	ILF3_MOUSE	STRBP_MOUSE	sp|Q9Z1X4|ILF3_MOUSE Interleukin enhancer-binding factor 3 OS=Mus musculus OX=10090 GN=Ilf3 PE=1 SV=2	132.015	true	2	1	1	4.68	96021	42	4	4	4	4	6	6	4	2	2	3	1	3	4		4	1	0	0	0	0	2	1	0	3	0	466063	416444	477248	325872	1.40568e+06	1.30374e+06		6.0031e+06	37751.4	129952	72827
450824	ILEUA_MOUSE	Serpinb1a	ILEUA_MOUSE	ILEUB_MOUSE; ILEUC_MOUSE	sp|Q9D154|ILEUA_MOUSE Leukocyte elastase inhibitor A OS=Mus musculus OX=10090 GN=Serpinb1a PE=1 SV=1	265.258	true	2	1	2	17.15	42575	23	6	6	6	6	8	8	6	1	5	6	1	5	6		6	4	0	1	1	0	1	0	0	3	2	505485	3.70965e+06	3525150	315794	6.58687e+06	2398966		6091032	2.67085e+06	34255	2.41727e+06
451709	PDS5A_MOUSE	Pds5a	PDS5A_MOUSE		sp|Q6A026|PDS5A_MOUSE Sister chromatid cohesion protein PDS5 homolog A OS=Mus musculus OX=10090 GN=Pds5a PE=1 SV=3	1.221	true	2	1	0	0.53	150327	89	1	1	1	1	1	1	1	1	1	1		1	1		1	1	0	0	0	0	0	0	0	1	0	20016.7	33333.2	183685		472943	131657		452568	10999.8	20016.7	20686.2
451271	NHRF1_MOUSE	Slc9a3r1	NHRF1_MOUSE		sp|P70441|NHRF1_MOUSE Na(+)/H(+) exchange regulatory cofactor NHE-RF1 OS=Mus musculus OX=10090 GN=Slc9a3r1 PE=1 SV=3	72.343	true	2	1	0	6.76	38600	26	2	2	2	2	2	2	2	1	2	2	2	2	2		2	1	0	0	0	0	0	0	0	2	0	211522	385537	1.16981e+06	284858	1.9986e+06	595372		1.78671e+06	351450	24413.5	235073
451593	F107B_MOUSE	Fam107b	F107B_MOUSE		sp|Q3TGF2|F107B_MOUSE Protein FAM107B OS=Mus musculus OX=10090 GN=Fam107b PE=1 SV=2	17.201	true	2	1	0	6.11	15571	10	1	1	1	1	4	4	1	1		1	1	1	1		1	1	1	0	1	0	1	0	0	1	0	282871		505166	222261	2.80983e+06	692249		779546	147873	282871	12408.4
452076	CSK21_MOUSE	Csnk2a1	CSK21_MOUSE		sp|Q60737|CSK21_MOUSE Casein kinase II subunit alpha OS=Mus musculus OX=10090 GN=Csnk2a1 PE=1 SV=2	148.925	true	2	1	0	10.23	45134	20	4	4	4	4	8	8	4	1	3	3	2	3	2		2	2	1	0	1	0	3	0	0	1	2	492281	856419	822795	493525	1916657	699663		4227102	593056	26352.2	841973
452077	PYRG1_MOUSE	Ctps1	PYRG1_MOUSE		sp|P70698|PYRG1_MOUSE CTP synthase 1 OS=Mus musculus OX=10090 GN=Ctps1 PE=1 SV=2	34.756	true	2	1	0	1.69	66682	35	1	1	1	1	1	1	1	1	1	1	1	1		1	1	1	0	0	0	0	0	0	0	1	0	147268	138966	141711	83461.2	357064		9724.33	779767	59000.5	147268	86240.4
451301	PERM_MOUSE	Mpo	PERM_MOUSE		sp|P11247|PERM_MOUSE Myeloperoxidase OS=Mus musculus OX=10090 GN=Mpo PE=1 SV=2	1225	true	2	1	0	42.62	81182	50	29	25	33	29	169	155	29	23	15	22	15	21	23	5	24	21	19	4	11	27	14	16	7	22	35	436264960	69650768	114445200	92219288	571423552	241015440	129858736	1045257536	396344928	608544704	53465740
451072	ODP2_MOUSE	Dlat	ODP2_MOUSE		sp|Q8BMF4|ODP2_MOUSE Dihydrolipoyllysine-residue acetyltransferase component of pyruvate dehydrogenase complex, mitochondrial OS=Mus musculus OX=10090 GN=Dlat PE=1 SV=2	40.343	true	2	1	0	2.49	67942	36	1	1	1	1	1	1	1	1	1	1	1	1	1		1	1	0	1	0	0	0	0	0	0	0	342304	773283	23541.3	212499	1.25303e+06	638186		1.44638e+06	170715	342304	479890
451638	SEC63_MOUSE	Sec63	SEC63_MOUSE		sp|Q8VHE0|SEC63_MOUSE Translocation protein SEC63 homolog OS=Mus musculus OX=10090 GN=Sec63 PE=1 SV=4	28.529	true	2	1	0	1.18	87870	43	1	1	1	1	1	1	1		1	1		1	1		1		0	0	0	0	0	0	0	1	0		100242	95084.9		237356	54409.4		350444		12446.4	62209.2
451763	MOB2_MOUSE	Mob2	MOB2_MOUSE		sp|Q8VI63|MOB2_MOUSE MOB kinase activator 2 OS=Mus musculus OX=10090 GN=Mob2 PE=1 SV=1	67.645	true	2	1	0	7.66	26851	11	2	2	2	2	3	3	2	1	2	2		2	1		2		0	0	0	0	1	0	0	2	0	169679	189741	208651		535054	61118.4		1.42028e+06		18455.4	130394
451026	CSTF2_MOUSE	Cstf2	CSTF2_MOUSE		sp|Q8BIQ5|CSTF2_MOUSE Cleavage stimulation factor subunit 2 OS=Mus musculus OX=10090 GN=Cstf2 PE=1 SV=2	21.776	true	2	1	0	1.55	61341	25	1	1	1	1	1	1	1	1	1	1		1	1		1		0	0	0	0	0	0	0	1	0	47828.7	48321.7	89216.8		250608	45735.5		601516		47828.7	29987.9
450895	NCF1_MOUSE	Ncf1	NCF1_MOUSE		sp|Q09014|NCF1_MOUSE Neutrophil cytosol factor 1 OS=Mus musculus OX=10090 GN=Ncf1 PE=1 SV=3	34.731	true	2	1	0	3.85	44667	27	2	2	2	2	2	2	2	2	2	2	2	2	2	1	1	2	0	0	0	0	2	0	0	0	0	116858	337907	254019	127500	1.03562e+06	269047	8739.38	40028.1	246402	59753.7	191881
452021	RTCA_MOUSE	RtcA	RTCA_MOUSE		sp|Q9D7H3|RTCA_MOUSE RNA 3'-terminal phosphate cyclase OS=Mus musculus OX=10090 GN=RtcA PE=1 SV=2	29.056	true	2	1	0	2.73	39254	21	1	1	1	1	1	1	1		1	1		1	1				0	0	0	0	1	0	0	0	0		49407.7	98229.2		124617	33474.2				12446.4	30661.8
450686	NUP43_MOUSE	Nup43	NUP43_MOUSE		sp|P59235|NUP43_MOUSE Nucleoporin Nup43 OS=Mus musculus OX=10090 GN=Nup43 PE=1 SV=2	53.019	true	2	1	0	4.47	41989	12	1	1	1	1	1	1	1	1		1		1			1		0	0	0	0	0	0	0	1	0	63729		74884.9		129955			275866		63729	12408.4
450560	KT33B_MOUSE	Krt33b	KT33B_MOUSE	K1C40_MOUSE; K1H2_MOUSE	sp|Q61897|KT33B_MOUSE Keratin, type I cuticular Ha3-II OS=Mus musculus OX=10090 GN=Krt33b PE=1 SV=2	111.99	true	2	1	2	8.66	45864	30	4	1	4	1	48	3	1		1	1	1	1	1		1		0	0	0	1	0	1	0	1	0	2689179392	2448942336	935758592	825783744	20413146	662881984	342558208	2434379264	302766560	12446.4	131162
450555	K1H1_MOUSE	Krt31	K1H1_MOUSE	K1C40_MOUSE; K1H2_MOUSE	sp|Q61765|K1H1_MOUSE Keratin, type I cuticular Ha1 OS=Mus musculus OX=10090 GN=Krt31 PE=1 SV=2	111.99	true	2	1	2	8.41	47117	30	4	1	4	1	48	3	1		1	1	1	1	1		1		0	0	0	1	0	1	0	1	0	2689179392	2448942336	935758592	825783744	20413146	662881984	342558208	2434379264	302766560	12446.4	131162
452051	ATP5E_MOUSE	Atp5f1e	ATP5E_MOUSE		sp|P56382|ATP5E_MOUSE ATP synthase subunit epsilon, mitochondrial OS=Mus musculus OX=10090 GN=Atp5f1e PE=1 SV=2	34.078	true	2	1	0	28.85	5838	4	2	2	2	2	2	2	2	2	2	1	2	2	1	1	2	1	0	0	0	0	1	0	0	0	1	410192	1.55836e+06	275112	237840	1885527	157068	5439.29	2870324	130911	273177	753771
450981	KCD20_MOUSE	Kctd20	KCD20_MOUSE		sp|Q8CDD8|KCD20_MOUSE BTB/POZ domain-containing protein KCTD20 OS=Mus musculus OX=10090 GN=Kctd20 PE=1 SV=1	26.488	true	2	1	0	2.15	47067	20	1	1	1	1	1	1	1			1							0	0	1	0	0	0	0	0	0			246780							12446.4	12408.4
451381	CDC5L_MOUSE	Cdc5l	CDC5L_MOUSE		sp|Q6A068|CDC5L_MOUSE Cell division cycle 5-like protein OS=Mus musculus OX=10090 GN=Cdc5l PE=1 SV=2	150.972	true	2	1	0	5.49	92190	48	5	5	5	5	6	6	5	3	3	5	3	5	5	1	4	4	0	0	0	1	1	2	0	1	1	899909	1.17426e+06	812205	1.60798e+06	3170175	3439194	24836	2.44236e+06	1.69734e+06	854190	329604
452123	M4K5_MOUSE	Map4k5	M4K5_MOUSE		sp|Q8BPM2|M4K5_MOUSE Mitogen-activated protein kinase kinase kinase kinase 5 OS=Mus musculus OX=10090 GN=Map4k5 PE=1 SV=2	21.373	true	2	1	0	1.06	95043	46	1	1	1	1	1	1	1		1	1					1		0	0	0	0	0	0	0	1	0		199086	39745.9					274043		12446.4	123551
451375	AP1G1_MOUSE	Ap1g1	AP1G1_MOUSE		sp|P22892|AP1G1_MOUSE AP-1 complex subunit gamma-1 OS=Mus musculus OX=10090 GN=Ap1g1 PE=1 SV=3	67.485	true	2	1	0	3.16	91350	45	3	3	3	3	3	3	3	2	3	2	1	2	1		3	2	0	0	0	0	1	0	0	2	0	88265.5	606186	346207	12829.7	805833	43104.6		3278872	57584.9	35013.8	385806
451487	ABI1_MOUSE	Abi1	ABI1_MOUSE	ABI2_MOUSE	sp|Q8CBW3|ABI1_MOUSE Abl interactor 1 OS=Mus musculus OX=10090 GN=Abi1 PE=1 SV=3	101.893	true	2	1	1	4.16	52288	23	2	2	2	2	2	2	2	2	1	2		1			2		0	0	0	0	0	0	0	2	0	332732	272354	263709		428744			2700221		189623	28268.7
451329	ERLN1_MOUSE	Erlin1	ERLN1_MOUSE; ERLN2_MOUSE		sp|Q91X78|ERLN1_MOUSE Erlin-1 OS=Mus musculus OX=10090 GN=Erlin1 PE=1 SV=2	61.487	true	2	2	0	5.46	39181	25	2	2	2	2	3	3	2	1	2	2		2	2		2	1	0	0	1	0	0	0	0	2	0	394720	832641	1.02377e+06		1.56545e+06	652271		2.95337e+06	94003.3	11331.8	473687
450735	ITA4_MOUSE	Itga4	ITA4_MOUSE		sp|Q00651|ITA4_MOUSE Integrin alpha-4 OS=Mus musculus OX=10090 GN=Itga4 PE=1 SV=1	23.684	true	2	1	0	0.77	115696	51	1	1	1	1	1	1	1	1	1	1		1			1		0	0	0	0	1	0	0	0	0	26581.5	39571.7	42738.6		117407			121312		26581.5	24557.7
452013	ANXA8_MOUSE	Anxa8	ANXA8_MOUSE		sp|O35640|ANXA8_MOUSE Annexin A8 OS=Mus musculus OX=10090 GN=Anxa8 PE=1 SV=2	25.428	true	2	1	0	2.14	36723	23	1	1	1	1	1	1	1	1		1	1		1		1	1	0	0	0	0	0	0	0	1	0	25991		188485	12079.6		30459.3		478404	7270.49	25991	12408.4
450673	CARM1_MOUSE	Carm1	CARM1_MOUSE		sp|Q9WVG6|CARM1_MOUSE Histone-arginine methyltransferase CARM1 OS=Mus musculus OX=10090 GN=Carm1 PE=1 SV=2	32.497	true	2	1	0	1.48	65852	27	1	1	1	1	1	1	1	1	1	1		1			1		0	0	0	0	0	0	0	1	0	34769.7	70454.4	91802.3		151973			601912		34769.7	43723.2
451399	ARPC3_MOUSE	Arpc3	ARPC3_MOUSE		sp|Q9JM76|ARPC3_MOUSE Actin-related protein 2/3 complex subunit 3 OS=Mus musculus OX=10090 GN=Arpc3 PE=1 SV=3	122.224	true	2	1	0	23.6	20525	12	4	4	4	4	5	5	4		2	3		3	2		3	1	0	1	1	0	1	0	0	2	0		4210005	5176692		6279656	2.22748e+06		3005309	99388.8	12446.4	498946
450553	AT2A2_MOUSE	Atp2a2	AT2A2_MOUSE	AT2A1_MOUSE	sp|O55143|AT2A2_MOUSE Sarcoplasmic/endoplasmic reticulum calcium ATPase 2 OS=Mus musculus OX=10090 GN=Atp2a2 PE=1 SV=2	167.846	true	2	1	1	5.65	114858	53	5	5	5	5	7	7	5	2	3	4	2	3	3		5	2	0	1	0	0	2	0	0	4	0	317323	584661	612306	251671	1.09825e+06	440754		6.52177e+06	76365.9	88724.6	194768
451713	PPIH_MOUSE	Ppih	PPIH_MOUSE		sp|Q9D868|PPIH_MOUSE Peptidyl-prolyl cis-trans isomerase H OS=Mus musculus OX=10090 GN=Ppih PE=1 SV=1	34.147	true	2	1	0	4.79	20464	14	1	1	1	1	1	1	1		1	1	1	1	1		1	1	0	0	0	0	0	0	0	1	0		112498	110130	38864.6	207512	139887		682279	7814.63	12446.4	69815.1
451644	YKT6_MOUSE	Ykt6	YKT6_MOUSE		sp|Q9CQW1|YKT6_MOUSE Synaptobrevin homolog YKT6 OS=Mus musculus OX=10090 GN=Ykt6 PE=1 SV=1	49.38	true	2	1	0	8.59	22314	14	2	2	2	2	2	2	2	1	2	2	1	2	1		2		0	0	0	0	1	1	0	0	0	36175.2	460842	346776	31103	874757	124524		1705403		10384.6	224266
452142	EMC2_MOUSE	Emc2	EMC2_MOUSE		sp|Q9CRD2|EMC2_MOUSE ER membrane protein complex subunit 2 OS=Mus musculus OX=10090 GN=Emc2 PE=1 SV=1	40.644	true	2	1	0	4.38	34935	16	1	1	1	1	1	1	1	1		1		1			1		0	0	0	0	0	0	0	1	0	77724.5		147994		176189			599608		77724.5	12408.4
451078	PEBP1_MOUSE	Pebp1	PEBP1_MOUSE		sp|P70296|PEBP1_MOUSE Phosphatidylethanolamine-binding protein 1 OS=Mus musculus OX=10090 GN=Pebp1 PE=1 SV=3	41.234	true	2	1	0	6.95	20830	10	1	1	1	1	1	1	1		1	1		1	1	1			0	0	0	0	1	0	0	0	0		240505	276039		604449	608502	47061.1			12446.4	149255
451185	SRSF6_MOUSE	Srsf6	SRSF6_MOUSE		sp|Q3TWW8|SRSF6_MOUSE Serine/arginine-rich splicing factor 6 OS=Mus musculus OX=10090 GN=Srsf6 PE=1 SV=1	130.565	true	2	1	0	10.91	39025	20	4	2	4	2	6	3	2	1	2	1	1	2	1		1	2	0	0	0	0	1	1	0	1	0	1.50894e+06	2.74992e+06	2138086	569341	7.85422e+06	1.43698e+06		2.92248e+06	207752	53379.6	326073
451942	GIT2_MOUSE	Git2	GIT2_MOUSE		sp|Q9JLQ2|GIT2_MOUSE ARF GTPase-activating protein GIT2 OS=Mus musculus OX=10090 GN=Git2 PE=1 SV=2	22.053	true	2	1	0	0.99	78766	38	1	1	1	1	1	1	1	1	1	1	1	1	1	1	1	1	1	0	0	0	0	0	0	0	0	97459.6	55483.5	206651	92125	150607	146569	2944.35	301032	164810	97459.6	34432.4
451999	RS6_MOUSE	Rps6	RS6_MOUSE		sp|P62754|RS6_MOUSE 40S ribosomal protein S6 OS=Mus musculus OX=10090 GN=Rps6 PE=1 SV=1	89.176	true	2	1	0	14.06	28680	13	3	3	3	3	10	10	3	2	2	2	1	1	2	3	2	2	1	1	1	1	0	2	1	0	3	16731050	3.5211e+06	7245923	10217448	274976	9042506	2.20321e+06	10764522	4055021	19684524	2.92598e+06
451761	IF4G2_MOUSE	Eif4g2	IF4G2_MOUSE		sp|Q62448|IF4G2_MOUSE Eukaryotic translation initiation factor 4 gamma 2 OS=Mus musculus OX=10090 GN=Eif4g2 PE=1 SV=2	27.388	true	2	1	0	1.1	102106	56	1	1	1	1	1	1	1		1	1		1					0	0	0	0	1	0	0	0	0		124067	44515.7		247463					12446.4	76994.8
451458	TMM33_MOUSE	Tmem33	TMM33_MOUSE		sp|Q9CR67|TMM33_MOUSE Transmembrane protein 33 OS=Mus musculus OX=10090 GN=Tmem33 PE=1 SV=1	21.931	true	2	1	0	3.64	28031	12	1	1	1	1	1	1	1		1	1		1	1		1		0	0	0	0	0	0	0	1	0		216736	253379		513924	89046		1.74114e+06		12446.4	134504
451404	NB5R3_MOUSE	Cyb5r3	NB5R3_MOUSE		sp|Q9DCN2|NB5R3_MOUSE NADH-cytochrome b5 reductase 3 OS=Mus musculus OX=10090 GN=Cyb5r3 PE=1 SV=3	54.122	true	2	1	0	6.64	34128	18	2	2	2	2	2	2	2	1	1	1		2	2		2	1	0	0	1	0	0	0	0	1	0	539762	4850998	846446		1.38424e+06	436287		912410	27667.4	92362.9	203879
451902	PAPS2_MOUSE	Papss2	PAPS2_MOUSE		sp|O88428|PAPS2_MOUSE Bifunctional 3'-phosphoadenosine 5'-phosphosulfate synthase 2 OS=Mus musculus OX=10090 GN=Papss2 PE=1 SV=2	5.574	true	2	1	0	1.13	70351	39	1	1	1	1	1	1	1		1		1	1	1				0	0	0	0	1	0	0	0	0		191628		227647	591211	206551				12446.4	118922
451377	PSA_MOUSE	Npepps	PSA_MOUSE		sp|Q11011|PSA_MOUSE Puromycin-sensitive aminopeptidase OS=Mus musculus OX=10090 GN=Npepps PE=1 SV=2	349.601	true	2	1	0	9.78	103325	57	9	9	9	9	14	14	9	4	6	7	5	7	6	1	9	3	1	2	0	0	1	1	0	8	0	1042907	2.5811e+06	1.5101e+06	270572	2876305	1.2137e+06	4386.17	15332106	644452	132497	1.58058e+06
451742	UT1_MOUSE	Slc14a1	UT1_MOUSE		sp|Q8VHL0|UT1_MOUSE Urea transporter 1 OS=Mus musculus OX=10090 GN=Slc14a1 PE=1 SV=2	11.635	true	2	1	0	1.82	42125	11	1	1	1	1	1	1	1			1							0	0	1	0	0	0	0	0	0			283680							12446.4	12408.4
451817	CG050_MOUSE		CG050_MOUSE		sp|Q9CXL3|CG050_MOUSE Uncharacterized protein C7orf50 homolog OS=Mus musculus OX=10090 PE=1 SV=3	31.138	true	2	1	0	13.85	22168	12	1	1	1	1	2	2	1	1				1	1		1		0	0	0	0	0	1	0	1	0	210668				369682	281533		305151		210668	12408.4
450585	TBA4A_MOUSE	Tuba4a	TBA4A_MOUSE	TBA8_MOUSE; TBAL3_MOUSE	sp|P68368|TBA4A_MOUSE Tubulin alpha-4A chain OS=Mus musculus OX=10090 GN=Tuba4a PE=1 SV=1	566.068	true	2	1	2	31.25	49924	23	13	3	15	3	48	12	3	1	2	3	2	3	3		3	1	0	2	1	1	2	2	0	3	1	1.71076e+06	21366834	17767346	4844061	47358640	20433630	46367.8	115057408	8041789	30031	1.99934e+06
451228	CUL1_MOUSE	Cul1	CUL1_MOUSE		sp|Q9WTX6|CUL1_MOUSE Cullin-1 OS=Mus musculus OX=10090 GN=Cul1 PE=1 SV=1	22.732	true	2	1	0	1.16	89692	52	1	1	1	1	1	1	1		1	1		1	1		1		0	0	0	0	0	0	0	1	0		145536	194970		338354	112706		868195		12446.4	90317.7
451560	EMC1_MOUSE	Emc1	EMC1_MOUSE		sp|Q8C7X2|EMC1_MOUSE ER membrane protein complex subunit 1 OS=Mus musculus OX=10090 GN=Emc1 PE=1 SV=1	65.196	true	2	1	0	2.01	111605	52	2	2	2	2	3	3	2	1	2	2		1	2		2		0	0	0	0	1	0	0	2	0	87819	296296	185919		258623	142783		1.03099e+06		13096.7	166838
452146	DHX9_MOUSE	Dhx9	DHX9_MOUSE		sp|O70133|DHX9_MOUSE ATP-dependent RNA helicase A OS=Mus musculus OX=10090 GN=Dhx9 PE=1 SV=2	165.386	true	2	1	0	5.36	149475	76	8	8	8	8	9	9	8	2	7	7	2	7	5	2	6	4	0	1	1	0	4	0	0	3	0	340574	3341194	3168019	797565	6706604	2.31647e+06	12272.7	9953301	377400	33844	2752108
451650	PGRC2_MOUSE	Pgrmc2	PGRC2_MOUSE		sp|Q80UU9|PGRC2_MOUSE Membrane-associated progesterone receptor component 2 OS=Mus musculus OX=10090 GN=Pgrmc2 PE=1 SV=2	48.145	true	2	1	0	7.37	23334	14	2	2	2	2	2	2	2	1	2	2		2	2		2	1	0	0	0	0	0	0	0	2	0	110932	219569	240285		511856	234905		1.55018e+06	9186.93	15623.7	160301
451056	ECHD1_MOUSE	Echdc1	ECHD1_MOUSE		sp|Q9D9V3|ECHD1_MOUSE Ethylmalonyl-CoA decarboxylase OS=Mus musculus OX=10090 GN=Echdc1 PE=1 SV=2	21.348	true	2	1	0	2.48	35466	21	1	1	1	1	1	1	1	1	1	1	1	1	1	1	1	1	0	0	0	0	0	0	0	1	0	78103.5	88990.7	60552.7	20222.4	119560	46233.3	11032.3	769098	5957.76	78103.5	55226.6
452046	ZFA_MOUSE	Zfa	ZFA_MOUSE; ZFX_MOUSE		sp|P23607|ZFA_MOUSE Zinc finger autosomal protein OS=Mus musculus OX=10090 GN=Zfa PE=3 SV=1	37.701	true	2	2	0	1.21	84658	32	1	1	1	1	1	1	1	1		1		1	1		1	1	0	0	0	0	0	0	0	1	0	337814		70325.3		115282	69782.1		342522	42886.9	337814	12408.4
451937	EFTU_MOUSE	Tufm	EFTU_MOUSE		sp|Q8BFR5|EFTU_MOUSE Elongation factor Tu, mitochondrial OS=Mus musculus OX=10090 GN=Tufm PE=1 SV=1	155.427	true	2	1	0	11.06	49508	32	5	5	5	5	7	7	5	1	3	4	1	4	3		4	2	0	0	1	1	2	0	0	3	0	129991	977525	484744	158615	1.90303e+06	149752		2.95909e+06	70263.7	20742.5	408351
451575	API5_MOUSE	Api5	API5_MOUSE		sp|O35841|API5_MOUSE Apoptosis inhibitor 5 OS=Mus musculus OX=10090 GN=Api5 PE=1 SV=2	141.173	true	2	1	0	8.13	56785	34	4	4	4	4	4	4	4	1	4	4		4	2	1	4	2	0	0	0	0	2	1	0	1	0	141471	1.46165e+06	1.8928e+06		3951248	439827	5754.17	4150113	95171.2	19279.3	749043
451135	AP2A1_MOUSE	Ap2a1	AP2A1_MOUSE		sp|P17426|AP2A1_MOUSE AP-2 complex subunit alpha-1 OS=Mus musculus OX=10090 GN=Ap2a1 PE=1 SV=1	86.322	true	2	1	0	2.87	107664	60	3	1	3	1	4	1	1	1	1	1		1	1		1		0	0	0	0	0	0	0	1	0	235817	685449	564761	192130	1.4394e+06	768917	18137.4	3.10391e+06	382899	35405.1	135634
451810	LDHB_MOUSE	Ldhb	LDHB_MOUSE		sp|P16125|LDHB_MOUSE L-lactate dehydrogenase B chain OS=Mus musculus OX=10090 GN=Ldhb PE=1 SV=2	57.292	true	2	1	0	5.69	36572	21	2	2	2	2	3	3	1	1	1	1		1			1	1	0	0	0	0	1	0	0	1	0	49108.4	455694	271994		1.27694e+06			2.27418e+06	81539.1	49108.4	282798
451636	NMNA1_MOUSE	Nmnat1	NMNA1_MOUSE		sp|Q9EPA7|NMNA1_MOUSE Nicotinamide/nicotinic acid mononucleotide adenylyltransferase 1 OS=Mus musculus OX=10090 GN=Nmnat1 PE=1 SV=2	42.365	true	2	1	0	3.86	32355	21	1	1	1	1	1	1	1	1			1	1	1		1		0	0	0	0	0	0	0	1	0	520164			92727.9	406395	210488		704735		520164	12408.4
451719	IKZF1_MOUSE	Ikzf1	IKZF1_MOUSE		sp|Q03267|IKZF1_MOUSE DNA-binding protein Ikaros OS=Mus musculus OX=10090 GN=Ikzf1 PE=1 SV=2	25.644	true	2	1	0	1.93	57336	35	1	1	1	1	1	1	1	1	1	1		1	1			1	0	0	0	0	1	0	0	0	0	33925.8	201346	182914		1.00843e+06	223929			214751	33925.8	124953
451455	PICAL_MOUSE	Picalm	PICAL_MOUSE	AP180_MOUSE	sp|Q7M6Y3|PICAL_MOUSE Phosphatidylinositol-binding clathrin assembly protein OS=Mus musculus OX=10090 GN=Picalm PE=1 SV=1	38.917	true	2	1	1	2.58	71543	27	2	2	2	2	2	2	2	2	2	2	1	2	1		2	1	0	0	0	0	0	0	0	2	0	148107	196187	128641	61688.3	401780	37832.6		1461762	77107.5	149436	122793
452158	RPIA_MOUSE	Rpia	RPIA_MOUSE		sp|P47968|RPIA_MOUSE Ribose-5-phosphate isomerase OS=Mus musculus OX=10090 GN=Rpia PE=1 SV=2	102.775	true	2	1	0	9.24	32451	17	2	2	2	2	2	2	2	1	1	2	1	2	2		1	1	0	1	0	0	0	0	0	1	0	424054	377889	797908	38075.5	1.13895e+06	682155		802127	93992.1	45229.7	26530.8
451572	RBBP5_MOUSE	Rbbp5	RBBP5_MOUSE		sp|Q8BX09|RBBP5_MOUSE Retinoblastoma-binding protein 5 OS=Mus musculus OX=10090 GN=Rbbp5 PE=1 SV=2	32.741	true	2	1	0	2.04	59096	29	1	1	1	1	1	1	1	1		1	1	1					0	0	0	0	1	0	0	0	0	78307.7		50062.6	76626.3	171066					78307.7	12408.4
451388	PARP1_MOUSE	Parp1	PARP1_MOUSE		sp|P11103|PARP1_MOUSE Poly [ADP-ribose] polymerase 1 OS=Mus musculus OX=10090 GN=Parp1 PE=1 SV=3	43.812	true	2	1	0	1.38	113100	61	1	1	1	1	2	2	1	1				1	1		1		1	0	0	0	1	0	0	0	0	320500				783920	164145		418246		320500	12408.4
451337	MSRA_MOUSE	Msra	MSRA_MOUSE		sp|Q9D6Y7|MSRA_MOUSE Mitochondrial peptide methionine sulfoxide reductase OS=Mus musculus OX=10090 GN=Msra PE=1 SV=1	32.713	true	2	1	0	4.72	25988	17	1	1	1	1	1	1	1		1		1	1	1				0	0	0	0	1	0	0	0	0		219641		47165.9	554437	117925				12446.4	136307
451090	AFG32_MOUSE	Afg3l2	AFG32_MOUSE		sp|Q8JZQ2|AFG32_MOUSE AFG3-like protein 2 OS=Mus musculus OX=10090 GN=Afg3l2 PE=1 SV=1	25.381	true	2	1	0	1.12	89519	53	1	1	1	1	1	1	1	1	1	1		1	1		1		0	0	0	0	0	0	0	1	0	74385.8	34346	44555.3		67972	196316		247175		74385.8	21314.8
451773	ODPX_MOUSE	Pdhx	ODPX_MOUSE		sp|Q8BKZ9|ODPX_MOUSE Pyruvate dehydrogenase protein X component, mitochondrial OS=Mus musculus OX=10090 GN=Pdhx PE=1 SV=1	32.665	true	2	1	0	1.8	53999	28	1	1	1	1	1	1	1		1	1		1	1		1	1	0	0	0	0	1	0	0	0	0		106299	71173.7		233075	67779		292044	9095.62	12446.4	65967.8
450778	PDCD6_MOUSE	Pdcd6	PDCD6_MOUSE		sp|P12815|PDCD6_MOUSE Programmed cell death protein 6 OS=Mus musculus OX=10090 GN=Pdcd6 PE=1 SV=2	34.775	true	2	1	0	6.81	21867	12	1	1	1	1	1	1	1	1				1			1		0	0	0	0	0	0	0	1	0	510565				77335.5			640128		510565	12408.4
451229	EDC4_MOUSE	Edc4	EDC4_MOUSE		sp|Q3UJB9|EDC4_MOUSE Enhancer of mRNA-decapping protein 4 OS=Mus musculus OX=10090 GN=Edc4 PE=1 SV=2	15.114	true	2	1	0	0.71	152484	68	1	1	1	1	1	1	1		1	1		1			1		0	0	0	0	0	0	0	1	0		148242	170087		357542			669351		12446.4	91997.1
452104	NDUS1_MOUSE	Ndufs1	NDUS1_MOUSE		sp|Q91VD9|NDUS1_MOUSE NADH-ubiquinone oxidoreductase 75 kDa subunit, mitochondrial OS=Mus musculus OX=10090 GN=Ndufs1 PE=1 SV=2	70.587	true	2	1	0	4.81	79777	45	4	4	4	4	4	4	4	2	3	4	1	4	3	1	4	2	0	0	0	0	1	0	0	3	0	182609	598358	535103	45258.6	1.45207e+06	297459	23011.8	1.84436e+06	134056	53639.9	519787
451045	RALA_MOUSE	Rala	RALA_MOUSE		sp|P63321|RALA_MOUSE Ras-related protein Ral-A OS=Mus musculus OX=10090 GN=Rala PE=1 SV=1	28.231	true	2	1	0	7.28	23553	10	1	1	1	1	1	1	1	1		1			1		1		0	0	0	0	0	1	0	0	0	138121		98841.3			103876		580769		138121	12408.4
451662	HP1B3_MOUSE	Hp1bp3	HP1B3_MOUSE		sp|Q3TEA8|HP1B3_MOUSE Heterochromatin protein 1-binding protein 3 OS=Mus musculus OX=10090 GN=Hp1bp3 PE=1 SV=1	185.168	true	2	1	0	8.48	60867	30	5	5	5	5	22	22	5	4	4	4	4	3	4	3	5	4	5	3	1	3	3	1	2	2	0	10455128	3431634	3.31036e+06	8739228	6399303	8863771	2.26502e+06	8178317	1.51072e+06	11687407	2516004
451019	XPO7_MOUSE	Xpo7	XPO7_MOUSE		sp|Q9EPK7|XPO7_MOUSE Exportin-7 OS=Mus musculus OX=10090 GN=Xpo7 PE=1 SV=3	30.997	true	2	1	0	0.83	123810	58	1	1	1	1	1	1	1	1	1	1	1		1		1		0	0	0	0	0	0	0	1	0	35920.5	98629.2	79007.7	15464.9		32749.8		588342		35920.5	61208.2
450531	KRT81_MOUSE	Krt81	KRT81_MOUSE; KRT86_MOUSE	KRT87_MOUSE	sp|Q9ERE2|KRT81_MOUSE Keratin, type II cuticular Hb1 OS=Mus musculus OX=10090 GN=Krt81 PE=2 SV=2	140.798	true	2	2	1	9.36	52863	32	6	3	6	3	9	5	3	3		2	2	3	2		2	1	0	0	0	1	2	0	0	2	0	337644096	4123.82	392993	5226192	1.3002e+06	1.23891e+06	16951.3	1829514	68170.9	539692	12408.4
451912	ACADM_MOUSE	Acadm	ACADM_MOUSE		sp|P45952|ACADM_MOUSE Medium-chain specific acyl-CoA dehydrogenase, mitochondrial OS=Mus musculus OX=10090 GN=Acadm PE=1 SV=1	25.381	true	2	1	0	2.14	46481	22	1	1	1	1	1	1	1		1	1	1		1	1	1	1	0	0	0	0	0	0	0	1	0		84824.6	116249	32760		83804	3373.14	271904	13922.5	12446.4	52641.2
451059	AIP_MOUSE	Aip	AIP_MOUSE		sp|O08915|AIP_MOUSE AH receptor-interacting protein OS=Mus musculus OX=10090 GN=Aip PE=1 SV=1	23.844	true	2	1	0	5.15	37605	20	1	1	1	1	1	1	1	1		1		1			1		0	0	1	0	0	0	0	0	0	76104.5		77861.1		207409			242540		76104.5	12408.4
451883	RPB2_MOUSE	Polr2b	RPB2_MOUSE		sp|Q8CFI7|RPB2_MOUSE DNA-directed RNA polymerase II subunit RPB2 OS=Mus musculus OX=10090 GN=Polr2b PE=1 SV=2	25.288	true	2	1	0	0.68	133911	72	1	1	1	1	1	1	1		1	1		1			1		0	0	0	0	0	0	0	1	0		130170	93448.6		278365			309836		12446.4	80781.8
451541	AGO1_MOUSE	Ago1	AGO1_MOUSE; AGO2_MOUSE		sp|Q8CJG1|AGO1_MOUSE Protein argonaute-1 OS=Mus musculus OX=10090 GN=Ago1 PE=1 SV=2	21.519	true	2	2	0	1.17	97214	56	1	1	1	1	1	1	1		1			1					0	0	0	0	1	0	0	0	0		236858			1.1803e+06					12446.4	146991
451678	RBM3_MOUSE	Rbm3	RBM3_MOUSE		sp|O89086|RBM3_MOUSE RNA-binding protein 3 OS=Mus musculus OX=10090 GN=Rbm3 PE=1 SV=1	24.003	true	2	1	0	6.54	16605	9	1	1	1	1	1	1	1	1	1	1	1	1	1		1	1	0	0	0	0	0	1	0	0	0	134528	188261	200691	94591.6	475979	304569		1.14122e+06	119036	134528	116833
451331	RL31_MOUSE	Rpl31	RL31_MOUSE		sp|P62900|RL31_MOUSE 60S ribosomal protein L31 OS=Mus musculus OX=10090 GN=Rpl31 PE=1 SV=1	61.799	true	2	1	0	13.6	14462	7	2	2	2	2	7	7	2	1	1	2	2	2	2		2	1	1	0	0	1	1	1	0	2	1	12943540	4.3889e+06	9811745	8337622	9819729	3031592		10381912	1.61735e+06	247513	103109
452040	BTF3_MOUSE	Btf3	BTF3_MOUSE		sp|Q64152|BTF3_MOUSE Transcription factor BTF3 OS=Mus musculus OX=10090 GN=Btf3 PE=1 SV=3	33.181	true	2	1	0	9.31	22031	12	1	1	1	1	2	2	1		1	1		1			1		0	1	0	0	0	0	0	1	0		379550	253202		319104			2414113		12446.4	235544
451581	PYGL_MOUSE	Pygl	PYGL_MOUSE		sp|Q9ET01|PYGL_MOUSE Glycogen phosphorylase, liver form OS=Mus musculus OX=10090 GN=Pygl PE=1 SV=4	63.132	true	2	1	0	3.29	97463	53	3	3	3	3	4	4	3	2	1	2		2	2		2	2	0	0	0	0	0	0	0	2	2	7.92076e+06	196631	326983		590175	361765		1.60068e+06	775850	4.05096e+06	52605.9
451285	LOXE3_MOUSE	Aloxe3	LOXE3_MOUSE		sp|Q9WV07|LOXE3_MOUSE Hydroperoxide isomerase ALOXE3 OS=Mus musculus OX=10090 GN=Aloxe3 PE=1 SV=2	49.056	true	2	1	0	4.08	80471	34	2	2	2	2	2	2	2	1	2	1		2	1		2		1	0	1	0	0	0	0	0	0	569941	606142	132541		231551	76408.1		820124		28796.7	525989
451324	INSRR_MOUSE	Insrr	INSRR_MOUSE		sp|Q9WTL4|INSRR_MOUSE Insulin receptor-related protein OS=Mus musculus OX=10090 GN=Insrr PE=1 SV=2	28.491	true	2	1	0	0.54	144875	70	1	1	1	1	11	11	1	1	1	1	1	1	1	1	1	1	1	2	1	1	0	1	3	0	2	30597712	8728314	30957274	28093096	10897237	34846808	2.46358e+06	63027580	5276008	30597712	5416691
450891	PP1R7_MOUSE	Ppp1r7	PP1R7_MOUSE		sp|Q3UM45|PP1R7_MOUSE Protein phosphatase 1 regulatory subunit 7 OS=Mus musculus OX=10090 GN=Ppp1r7 PE=1 SV=2	29.731	true	2	1	0	2.49	41292	21	1	1	1	1	2	2	1		1	1		1	1		1		0	0	0	0	0	0	0	2	0		140374	208099		387123	155768		711880		12446.4	87114.7
452147	ARHG1_MOUSE	Arhgef1	ARHG1_MOUSE		sp|Q61210|ARHG1_MOUSE Rho guanine nucleotide exchange factor 1 OS=Mus musculus OX=10090 GN=Arhgef1 PE=1 SV=2	31.254	true	2	1	0	1.09	102805	50	1	1	1	1	1	1	1		1	1		1	1		1		0	0	0	0	1	0	0	0	0		71911.6	115633		382299	96811		201883		12446.4	44627.5
450912	MICA1_MOUSE	Mical1	MICA1_MOUSE		sp|Q8VDP3|MICA1_MOUSE [F-actin]-monooxygenase MICAL1 OS=Mus musculus OX=10090 GN=Mical1 PE=1 SV=1	25.302	true	2	1	0	0.76	116785	52	1	1	1	1	1	1	1	1		1	1	1	1		1	1	0	0	0	0	1	0	0	0	0	37178.6		116925	41631.4	181077	58032.5		152146	14658.6	37178.6	12408.4
451564	NDUB3_MOUSE	Ndufb3	NDUB3_MOUSE		sp|Q9CQZ6|NDUB3_MOUSE NADH dehydrogenase [ubiquinone] 1 beta subcomplex subunit 3 OS=Mus musculus OX=10090 GN=Ndufb3 PE=1 SV=1	41.328	true	2	1	0	10.58	11692	5	1	1	1	1	1	1	1		1	1	1	1	1			1	0	0	0	0	1	0	0	0	0		164426	258816	58407.2	484157	301134			77186.5	12446.4	102041
450793	PSMD3_MOUSE	Psmd3	PSMD3_MOUSE		sp|P14685|PSMD3_MOUSE 26S proteasome non-ATPase regulatory subunit 3 OS=Mus musculus OX=10090 GN=Psmd3 PE=1 SV=3	207.001	true	2	1	0	11.32	60718	39	6	6	6	6	8	8	6	5	2	6	3	6	5		6	2	0	1	1	0	0	0	0	6	0	1.07776e+06	1.02971e+06	1.39882e+06	1.35872e+06	2.97977e+06	1.15065e+06		14860245	878441	1.32803e+06	30588
451054	RS17_MOUSE	Rps17	RS17_MOUSE		sp|P63276|RS17_MOUSE 40S ribosomal protein S17 OS=Mus musculus OX=10090 GN=Rps17 PE=1 SV=2	264.281	true	2	1	0	48.89	15524	6	5	5	6	6	7	7	5	2	2	5		5	5		5		0	0	1	0	1	1	0	3	0	700895	714245	2.42268e+06		2617207	1313614		7847827		44007.7	20804
451944	TM9S3_MOUSE	Tm9sf3	TM9S3_MOUSE		sp|Q9ET30|TM9S3_MOUSE Transmembrane 9 superfamily member 3 OS=Mus musculus OX=10090 GN=Tm9sf3 PE=1 SV=1	64.719	true	2	1	0	3.07	67545	22	2	2	2	2	2	2	2	1	1	2	1	2	2		2	1	0	0	0	0	0	0	0	2	0	30290.3	425311	1.00842e+06	103021	941602	961384		3609795	4284.07	15134.3	39603.8
450653	IL16_MOUSE	Il16	IL16_MOUSE		sp|O54824|IL16_MOUSE Pro-interleukin-16 OS=Mus musculus OX=10090 GN=Il16 PE=1 SV=3	52.103	true	2	1	0	1.89	141435	74	2	2	2	2	2	2	2	1	2			2	1		1		0	0	0	0	1	0	0	1	0	88736.9	294820			279136	84000		164258		12958.9	197204
450687	RBM42_MOUSE	Rbm42	RBM42_MOUSE		sp|Q91V81|RBM42_MOUSE RNA-binding protein 42 OS=Mus musculus OX=10090 GN=Rbm42 PE=1 SV=2	31.306	true	2	1	0	1.67	50235	20	1	1	1	1	1	1	1		1	1	1	1	1		1		0	0	0	0	1	0	0	0	0		64994.4	63387.1	20931.5	112722	37442.6		94622.1		12446.4	40334.8
451591	HNRPK_MOUSE	Hnrnpk	HNRPK_MOUSE		sp|P61979|HNRPK_MOUSE Heterogeneous nuclear ribonucleoprotein K OS=Mus musculus OX=10090 GN=Hnrnpk PE=1 SV=1	273.474	true	2	1	0	12.53	50976	26	6	6	8	8	20	20	8	4	7	6	4	8	5	1	8	7	1	1	2	1	5	2	0	6	2	1.03735e+06	4609184	2303146	894488	10164109	2.48907e+06	43070.3	15857349	1.70728e+06	620622	2.88049e+06
450621	CPNE1_MOUSE	Cpne1	CPNE1_MOUSE		sp|Q8C166|CPNE1_MOUSE Copine-1 OS=Mus musculus OX=10090 GN=Cpne1 PE=1 SV=1	51.334	true	2	1	0	3.36	58887	25	2	1	2	1	2	1	1		1		1	1					0	1	0	0	0	0	0	0	0	432694	784649	381546	77943.2	1.19825e+06	394721		838166		12446.4	162215
450876	GLYM_MOUSE	Shmt2	GLYM_MOUSE		sp|Q9CZN7|GLYM_MOUSE Serine hydroxymethyltransferase, mitochondrial OS=Mus musculus OX=10090 GN=Shmt2 PE=1 SV=1	111.286	true	2	1	0	6.75	55759	31	4	4	4	4	8	8	4	3	4	4	2	4	4	2	3	3	0	1	1	0	3	0	0	3	0	221321	2125561	1.76586e+06	183174	6115533	1310177	17546.6	4.53404e+06	520297	146861	1.32101e+06
451807	RFA1_MOUSE	Rpa1	RFA1_MOUSE		sp|Q8VEE4|RFA1_MOUSE Replication protein A 70 kDa DNA-binding subunit OS=Mus musculus OX=10090 GN=Rpa1 PE=1 SV=1	31.232	true	2	1	0	1.61	69037	36	1	1	1	1	1	1	1	1	1	1	1	1	1	1	1	1	0	0	0	0	0	0	0	1	0	415717	134910	278211	431043	447050	267436	14698.4	683026	141809	415717	83723.9
452120	ACON_MOUSE	Aco2	ACON_MOUSE		sp|Q99KI0|ACON_MOUSE Aconitate hydratase, mitochondrial OS=Mus musculus OX=10090 GN=Aco2 PE=1 SV=1	160.559	true	2	1	0	7.44	85464	44	5	5	5	5	9	9	5	1	3	4		4	4		5	4	0	0	1	0	2	0	0	5	1	122865	1.47009e+06	2.22861e+06		3.86944e+06	1.34798e+06		4738610	508256	20088.2	839221
451419	TPD54_MOUSE	Tpd52l2	TPD54_MOUSE		sp|Q9CYZ2|TPD54_MOUSE Tumor protein D54 OS=Mus musculus OX=10090 GN=Tpd52l2 PE=1 SV=1	62.659	true	2	1	0	7.73	24043	16	2	2	2	2	3	3	2	2	2	2		2	2		2	1	0	1	0	0	1	0	0	1	0	175091	288068	303505		999892	247498		3.35753e+06	103805	174445	175819
451023	GOLI4_MOUSE	Golim4	GOLI4_MOUSE		sp|Q8BXA1|GOLI4_MOUSE Golgi integral membrane protein 4 OS=Mus musculus OX=10090 GN=Golim4 PE=1 SV=1	10.607	true	2	1	0	1.37	76785	38	1	1	1	1	1	1	1	1	1	1	1	1	1		1	1	0	0	0	0	0	0	0	1	0	57241.1	1.10982e+06	57969	96048.2	399116	211679		565347	154064	57241.1	688739
451949	LEGL_MOUSE	Lgalsl	LEGL_MOUSE		sp|Q8VED9|LEGL_MOUSE Galectin-related protein OS=Mus musculus OX=10090 GN=Lgalsl PE=1 SV=1	28.046	true	2	1	0	6.4	18955	10	1	1	1	1	1	1	1		1	1		1	1		1		0	0	0	0	0	0	0	1	0		623958	201621		270488	239079		2.80427e+06		12446.4	387221
451789	PGAM5_MOUSE	Pgam5	PGAM5_MOUSE		sp|Q8BX10|PGAM5_MOUSE Serine/threonine-protein phosphatase PGAM5, mitochondrial OS=Mus musculus OX=10090 GN=Pgam5 PE=1 SV=1	165.475	true	2	1	0	15.62	31994	22	5	5	5	5	10	10	5	4	3	5	4	5	5	1	5	4	2	0	0	2	2	1	0	2	1	4694977	1.0225e+06	2124389	4555932	20303910	12166754	4714.68	18881116	4366886	4.36376e+06	589637
452161	DNJC9_MOUSE	Dnajc9	DNJC9_MOUSE		sp|Q91WN1|DNJC9_MOUSE DnaJ homolog subfamily C member 9 OS=Mus musculus OX=10090 GN=Dnajc9 PE=1 SV=2	94.741	true	2	1	0	11.2	30059	18	3	3	3	3	3	3	2	1	1	2	1	2	1		2		0	0	0	0	1	1	0	0	0	302848	339674	489429	51373.4	1.02245e+06	222451		544243		35440.4	23585.7
450770	GSHR_MOUSE	Gsr	GSHR_MOUSE		sp|P47791|GSHR_MOUSE Glutathione reductase, mitochondrial OS=Mus musculus OX=10090 GN=Gsr PE=1 SV=3	172.286	true	2	1	0	13.2	53663	26	4	4	4	4	7	7	4	2	4	4	1	3	4	1	4	2	0	3	0	0	1	0	0	3	0	247590	2.15646e+06	1206748	1.7417e+06	4826853	942166	3084.48	2764838	1.55059e+06	140441	2.32792e+06
451412	NAA15_MOUSE	Naa15	NAA15_MOUSE		sp|Q80UM3|NAA15_MOUSE N-alpha-acetyltransferase 15, NatA auxiliary subunit OS=Mus musculus OX=10090 GN=Naa15 PE=1 SV=1	30.442	true	2	1	0	1.04	100961	62	1	1	1	1	3	3	1	1	1	1		1	1		1	1	1	0	0	0	1	1	0	0	0	173529	189511	227071		765527	183984		1.43613e+06	117585	173529	117608
452095	SYRC_MOUSE	Rars1	SYRC_MOUSE		sp|Q9D0I9|SYRC_MOUSE Arginine--tRNA ligase, cytoplasmic OS=Mus musculus OX=10090 GN=Rars1 PE=1 SV=2	97.495	true	2	1	0	5.76	75674	42	4	4	4	4	6	6	4	2	3	4	1	2	3	1	4	1	0	0	1	0	0	1	0	3	0	472054	822137	617152	133207	432588	714693	31268.9	5.37148e+06	261909	147414	522258
451964	PRP17_MOUSE	Cdc40	PRP17_MOUSE		sp|Q9DC48|PRP17_MOUSE Pre-mRNA-processing factor 17 OS=Mus musculus OX=10090 GN=Cdc40 PE=2 SV=1	97.068	true	2	1	0	4.32	65460	38	3	3	3	3	4	4	3	2	2	2	1	3	2	1	2	2	0	0	0	0	1	0	0	1	2	518659	194461	1.53105e+06	928815	1.98391e+06	1.78265e+06	45257.5	276503	212148	469980	107903
450749	LAP2B_MOUSE	Tmpo	LAP2B_MOUSE		sp|Q61029|LAP2B_MOUSE Lamina-associated polypeptide 2, isoforms beta/delta/epsilon/gamma OS=Mus musculus OX=10090 GN=Tmpo PE=1 SV=4	235.91	true	2	1	0	15.71	50373	24	5	2	5	2	10	4	2	2	2	2	1	2	2	1	2	1	0	0	1	0	1	0	0	1	1	5653063	3.49504e+06	3.82283e+06	3.49192e+06	10381098	1.92468e+06	151325	4156895	750912	3.24404e+06	1.07787e+06
451781	EIF3C_MOUSE	Eif3c	EIF3C_MOUSE		sp|Q8R1B4|EIF3C_MOUSE Eukaryotic translation initiation factor 3 subunit C OS=Mus musculus OX=10090 GN=Eif3c PE=1 SV=1	172.682	true	2	1	0	8.45	105531	45	7	7	7	7	7	7	7	2	6	6	2	6	4	1	6	3	0	1	0	0	2	0	0	4	0	288402	1.35002e+06	1.23846e+06	141761	2.17025e+06	789336	13180.6	4966055	215272	31641	939304
450595	MLP3A_MOUSE	Map1lc3a	MLP3A_MOUSE; MLP3B_MOUSE		sp|Q91VR7|MLP3A_MOUSE Microtubule-associated proteins 1A/1B light chain 3A OS=Mus musculus OX=10090 GN=Map1lc3a PE=1 SV=1	19.08	true	2	2	0	5.79	14272	6	1	1	1	1	1	1	1	1	1	1		1	1		1		0	0	0	0	0	0	0	1	0	143605	32858.8	125709		363272	120895		1.0045e+06		143605	20391.8
451273	CPNS1_MOUSE	Capns1	CPNS1_MOUSE		sp|O88456|CPNS1_MOUSE Calpain small subunit 1 OS=Mus musculus OX=10090 GN=Capns1 PE=1 SV=1	83.504	true	2	1	0	11.9	28463	13	3	2	3	2	4	3	2	1	1	2	1	2	2		1	1	0	0	1	0	2	0	0	0	0	148754	87887.3	274468	43850.6	633910	262912		200940	28286.2	40016.3	10369.6
450704	SORL_MOUSE	Sorl1	SORL_MOUSE		sp|O88307|SORL_MOUSE Sortilin-related receptor OS=Mus musculus OX=10090 GN=Sorl1 PE=1 SV=3	27.528	true	2	1	0	0.45	247086	127	1	1	1	1	1	1	1		1	1		1	1		1		0	0	0	0	1	0	0	0	0		69010.8	78993.3		219795	76863.1		113693		12446.4	42827.3
451892	RANB3_MOUSE	Ranbp3	RANB3_MOUSE		sp|Q9CT10|RANB3_MOUSE Ran-binding protein 3 OS=Mus musculus OX=10090 GN=Ranbp3 PE=1 SV=2	43.189	true	2	1	0	1.83	52573	26	1	1	1	1	1	1	1		1	1		1	1		1		0	0	0	0	1	0	0	0	0		183942	136109		519311	85624.6		520540		12446.4	114152
451818	GSDMD_MOUSE	Gsdmdc1	GSDMD_MOUSE		sp|Q9D8T2|GSDMD_MOUSE Gasdermin-D OS=Mus musculus OX=10090 GN=Gsdmdc1 PE=1 SV=1	23.809	true	2	1	0	1.85	53238	27	1	1	1	1	2	2	1		1	1		1	1		1	1	0	0	0	0	1	0	0	1	0		249197	131911		504335	197860		404512	22226.8	12446.4	154649
451321	M2OM_MOUSE	Slc25a11	M2OM_MOUSE		sp|Q9CR62|M2OM_MOUSE Mitochondrial 2-oxoglutarate/malate carrier protein OS=Mus musculus OX=10090 GN=Slc25a11 PE=1 SV=3	35.759	true	2	1	0	5.1	34155	19	1	1	1	1	1	1	1		1	1		1	1		1		0	0	0	0	0	0	0	1	0		197523	232976		434377	40929.6		940019		12446.4	122581
450934	ABCE1_MOUSE	Abce1	ABCE1_MOUSE		sp|P61222|ABCE1_MOUSE ATP-binding cassette sub-family E member 1 OS=Mus musculus OX=10090 GN=Abce1 PE=1 SV=1	32.897	true	2	1	0	3.17	67314	36	2	2	2	2	3	3	2	1	2	2		2	2		2		0	0	0	0	2	0	0	1	0	137546	301775	409166		1.01275e+06	571643		2.09136e+06		9926.46	199721
450897	TCPD_MOUSE	Cct4	TCPD_MOUSE		sp|P80315|TCPD_MOUSE T-complex protein 1 subunit delta OS=Mus musculus OX=10090 GN=Cct4 PE=1 SV=3	223.095	true	2	1	0	12.24	58066	38	7	7	7	7	11	11	7	2	4	6	2	6	4		6	4	0	1	1	0	2	1	0	5	1	792501	2.65129e+06	3.02681e+06	365205	4.92374e+06	1.64509e+06		17591384	1.25594e+06	76344.4	1.81047e+06
450535	K2C1_MOUSE	Krt1	K2C1_MOUSE		sp|P04104|K2C1_MOUSE Keratin, type II cytoskeletal 1 OS=Mus musculus OX=10090 GN=Krt1 PE=1 SV=4	413.957	true	2	1	0	6.44	65606	35	9	4	9	4	164	94	4	3	3	3	3	4	4	2	4	2	14	9	9	18	10	9	6	8	11	3179875328	914197760	333898688	624256448	1085192192	1183885952	1270022272	2273180160	509276672	204135824	289070304
451609	MYO1C_MOUSE	Myo1c	MYO1C_MOUSE		sp|Q9WTI7|MYO1C_MOUSE Unconventional myosin-Ic OS=Mus musculus OX=10090 GN=Myo1c PE=1 SV=2	51.059	true	2	1	0	0.94	121944	66	1	1	1	1	1	1	1		1	1			1		1		0	0	0	0	0	0	0	1	0		709604	50426.4			79549.3		720023		12446.4	440372
452033	PABP2_MOUSE	Pabpn1	PABP2_MOUSE		sp|Q8CCS6|PABP2_MOUSE Polyadenylate-binding protein 2 OS=Mus musculus OX=10090 GN=Pabpn1 PE=1 SV=3	25.39	true	2	1	0	3.64	32297	15	1	1	1	1	1	1	1		1	1		1	1		1		0	0	0	0	0	0	0	1	0		159287	205299		277630	65173.3		657235		12446.4	98851.6
451448	UCHL5_MOUSE	Uchl5	UCHL5_MOUSE		sp|Q9WUP7|UCHL5_MOUSE Ubiquitin carboxyl-terminal hydrolase isozyme L5 OS=Mus musculus OX=10090 GN=Uchl5 PE=1 SV=2	29.628	true	2	1	0	2.43	37617	20	1	1	1	1	1	1	1		1			1					0	1	0	0	0	0	0	0	0		300772			29159.4					12446.4	186656
451247	RPN1_MOUSE	Rpn1	RPN1_MOUSE		sp|Q91YQ5|RPN1_MOUSE Dolichyl-diphosphooligosaccharide--protein glycosyltransferase subunit 1 OS=Mus musculus OX=10090 GN=Rpn1 PE=1 SV=1	163.653	true	2	1	0	6.74	68528	41	4	4	4	4	7	7	4		4	4	1	4	3	1	3	2	0	0	1	0	2	1	0	3	0		1.30939e+06	897688	307728	3.73294e+06	1053905	24623.9	2.05671e+06	154029	12446.4	1.08227e+06
451762	NUP98_MOUSE	Nup98	NUP98_MOUSE		sp|Q6PFD9|NUP98_MOUSE Nuclear pore complex protein Nup98-Nup96 OS=Mus musculus OX=10090 GN=Nup98 PE=1 SV=2	22.147	true	2	1	0	0.5	197241	84	1	1	1	1	1	1	1		1	1		1	1		1		0	0	0	0	0	0	0	1	0		157528	147839		353668	116986		460423		12446.4	97759.8
451016	SCLY_MOUSE	Scly	SCLY_MOUSE		sp|Q9JLI6|SCLY_MOUSE Selenocysteine lyase OS=Mus musculus OX=10090 GN=Scly PE=1 SV=1	16.184	true	2	1	0	2.08	47174	28	1	1	1	1	1	1	1	1	1	1	1	1	1		1	1	0	0	0	0	1	0	0	0	0	31876.8	48333.9	76063.7	14483.9	136806	34164.4		103136	23690.1	31876.8	29995.4
450630	LC7L2_MOUSE	Luc7l2	LC7L2_MOUSE		sp|Q7TNC4|LC7L2_MOUSE Putative RNA-binding protein Luc7-like 2 OS=Mus musculus OX=10090 GN=Luc7l2 PE=1 SV=1	171.517	true	2	1	0	10.46	46583	19	4	1	4	1	9	3	1		1	1		1	1		1	1	0	0	0	0	0	1	0	1	1	60441.1	1.66396e+06	8165792	42463.4	7.26335e+06	5215520	137285	11068307	1.67888e+06	12446.4	900909
451212	FIGLA_MOUSE	Figla	FIGLA_MOUSE		sp|O55208|FIGLA_MOUSE Factor in the germline alpha OS=Mus musculus OX=10090 GN=Figla PE=2 SV=1	0.397	true	2	1	0	4.12	21529	8	1	1	1	1	1	1	1	1	1	1		1	1		1		0	0	0	0	0	1	0	0	0	190610	34476.2	38765		289194	237859		397260		190610	21395.5
450860	DHB11_MOUSE	Hsd17b11	DHB11_MOUSE	DHB13_MOUSE	sp|Q9EQ06|DHB11_MOUSE Estradiol 17-beta-dehydrogenase 11 OS=Mus musculus OX=10090 GN=Hsd17b11 PE=1 SV=1	92.808	true	2	1	1	9.06	32881	17	3	3	3	3	5	5	3	3	1	3	2	3	2		3	2	1	0	1	0	2	0	0	1	0	1.07993e+06	415480	1.60361e+06	254727	4822143	606859		2.85256e+06	97460.7	1.07557e+06	6626.77
452135	BAIP2_MOUSE	Baiap2	BAIP2_MOUSE		sp|Q8BKX1|BAIP2_MOUSE Brain-specific angiogenesis inhibitor 1-associated protein 2 OS=Mus musculus OX=10090 GN=Baiap2 PE=1 SV=2	54.106	true	2	1	0	2.43	59237	44	1	1	1	1	1	1	1		1				1		1		0	0	0	0	0	0	0	1	0		1.44744e+06				63588.9		821228		12446.4	898262
450510	RAB35_MOUSE	Rab35	RAB35_MOUSE	RAB12_MOUSE; RAB26_MOUSE; RAB30_MOUSE; RAB37_MOUSE; RAB3A_MOUSE; RAB3B_MOUSE; RAB3C_MOUSE; RAB3D_MOUSE; RAB43_MOUSE; RB39B_MOUSE	sp|Q6PHN9|RAB35_MOUSE Ras-related protein Rab-35 OS=Mus musculus OX=10090 GN=Rab35 PE=1 SV=1	125.926	true	2	1	10	15.42	23025	15	3	2	3	2	6	4	2	2	2	2	2	2	2		2	1	1	0	0	1	0	0	0	2	0	4466148	3.60468e+06	6.2156e+06	821685	12630632	4802636		46901568	145401	1.6008e+06	114049
450684	ECP1_MOUSE	Ear1	ECP1_MOUSE; ECP2_MOUSE		sp|P97426|ECP1_MOUSE Eosinophil cationic protein 1 OS=Mus musculus OX=10090 GN=Ear1 PE=2 SV=1	25.512	true	2	2	0	12.26	17296	8	1	1	1	1	1	1	1			1		1					0	0	1	0	0	0	0	0	0			461130		45269.7					12446.4	12408.4
451115	GELS_MOUSE	Gsn	GELS_MOUSE		sp|P13020|GELS_MOUSE Gelsolin OS=Mus musculus OX=10090 GN=Gsn PE=1 SV=3	186.482	true	2	1	0	8.85	85942	37	6	6	6	6	7	7	6	3	4	5	3	5	5	1	6	3	1	0	1	0	1	0	0	3	1	1.06202e+06	1.80651e+06	1.70748e+06	226787	2.20693e+06	1648989	18137.4	13529437	1.18835e+06	1.08891e+06	827118
451186	SRSF5_MOUSE	Srsf5	SRSF5_MOUSE		sp|O35326|SRSF5_MOUSE Serine/arginine-rich splicing factor 5 OS=Mus musculus OX=10090 GN=Srsf5 PE=1 SV=2	68.829	true	2	1	0	7.81	30891	14	2	1	2	1	3	1	1		1	1		1	1		1		0	0	0	0	1	0	0	0	0	1.18416e+06	2.22597e+06	1.85958e+06	400982	5001542	1108373		2.60488e+06	127576	12446.4	95108.6
450558	K1C15_MOUSE	Krt15	K1C15_MOUSE	K1C20_MOUSE; K1C24_MOUSE; K1C28_MOUSE; K1H2_MOUSE; KT222_MOUSE	sp|Q61414|K1C15_MOUSE Keratin, type I cytoskeletal 15 OS=Mus musculus OX=10090 GN=Krt15 PE=1 SV=2	733.481	true	2	1	5	20.58	49138	32	16	6	19	7	509	17	7	4	5	3	2	4	4	1	5	1	6	3	1	1	0	1	0	5	0	5904583680	7897448448	2376892160	2495203584	1477342720	3026314496	2473220352	2826302208	618199168	7.58348e+06	2.13258e+06
451708	PRS7_MOUSE	Psmc2	PRS7_MOUSE		sp|P46471|PRS7_MOUSE 26S proteasome regulatory subunit 7 OS=Mus musculus OX=10090 GN=Psmc2 PE=1 SV=5	268.786	true	2	1	0	17.55	48648	32	7	7	7	7	7	7	7	2	6	6	1	7	3		7	2	0	0	0	0	0	0	0	7	0	106938	1.06964e+06	1.11113e+06	245210	3100681	411608		15634650	147727	24787.4	691789
452085	DC1L1_MOUSE	Dync1li1	DC1L1_MOUSE		sp|Q8R1Q8|DC1L1_MOUSE Cytoplasmic dynein 1 light intermediate chain 1 OS=Mus musculus OX=10090 GN=Dync1li1 PE=1 SV=1	39.351	true	2	1	0	3.25	56614	33	2	2	2	2	3	3	2	2	1	1	1	2	1		1	1	0	1	1	0	1	0	0	0	0	247562	887727	61887.1	103772	1.26248e+06	36225.8		2.08688e+06	33435.1	228868	195805
450952	ECH1_MOUSE	Ech1	ECH1_MOUSE		sp|O35459|ECH1_MOUSE Delta(3,5)-Delta(2,4)-dienoyl-CoA isomerase, mitochondrial OS=Mus musculus OX=10090 GN=Ech1 PE=1 SV=1	16.641	true	2	1	0	2.14	36118	22	1	1	1	1	1	1	1		1	1		1	1				0	0	0	0	1	0	0	0	0		100515	96664.6		171357	24634				12446.4	62378.5
451538	ROA0_MOUSE	Hnrnpa0	ROA0_MOUSE		sp|Q9CX86|ROA0_MOUSE Heterogeneous nuclear ribonucleoprotein A0 OS=Mus musculus OX=10090 GN=Hnrnpa0 PE=1 SV=1	36.785	true	2	1	0	4.92	30530	15	2	2	2	2	3	3	2	1	1	2	1	1	2	1	2	1	1	0	0	0	0	2	0	0	0	269535	555602	911258	49403.6	2198777	1.04107e+06	2909.19	2576626	433412	88139.8	91054
450908	RL22L_MOUSE	Rpl22l1	RL22L_MOUSE		sp|Q9D7S7|RL22L_MOUSE 60S ribosomal protein L22-like 1 OS=Mus musculus OX=10090 GN=Rpl22l1 PE=1 SV=1	51.296	true	2	1	0	15.57	14467	6	2	2	2	2	5	5	2	1	2	2	2	2	2	1	1	2	0	0	0	0	3	2	0	0	0	207530	1.21485e+06	1.49039e+06	220925	2698491	1119591	8591.3	1.02082e+06	420548	18001.3	735817
450790	NOP2_MOUSE	Nop2	NOP2_MOUSE		sp|Q922K7|NOP2_MOUSE Probable 28S rRNA (cytosine-C(5))-methyltransferase OS=Mus musculus OX=10090 GN=Nop2 PE=1 SV=1	88.036	true	2	1	0	4.16	86752	40	3	3	3	3	4	4	3	3	1	2	2	3	3		3	3	1	0	0	1	0	2	0	0	0	911300	85519.1	175146	1.28311e+06	743519	741211		475741	120629	827377	10676.9
451471	CHM4B_MOUSE	Chmp4b	CHM4B_MOUSE		sp|Q9D8B3|CHM4B_MOUSE Charged multivesicular body protein 4b OS=Mus musculus OX=10090 GN=Chmp4b PE=1 SV=2	131.21	true	2	1	0	10.71	24936	16	3	3	3	3	6	6	3	2	1	3	1	3	2		3	1	1	0	1	0	2	0	0	2	0	364678	104253	2.40355e+06	232582	2.28862e+06	1.17833e+06		4885563	164692	148542	7246.48
450760	APT_MOUSE	Aprt	APT_MOUSE		sp|P08030|APT_MOUSE Adenine phosphoribosyltransferase OS=Mus musculus OX=10090 GN=Aprt PE=1 SV=2	49.983	true	2	1	0	9.44	19724	14	2	2	2	2	2	2	2	2	2	2	1	2	2	1	2	1	0	0	0	0	2	0	0	0	0	797853	1.05996e+06	820530	20018	2.21213e+06	883788	10848.7	9003626	199857	636775	579260
450527	H2A2A_MOUSE	Hist2h2aa1	H2A2A_MOUSE; H2A2C_MOUSE	H2A2B_MOUSE	sp|Q6GSS7|H2A2A_MOUSE Histone H2A type 2-A OS=Mus musculus OX=10090 GN=Hist2h2aa1 PE=1 SV=3	218.383	true	2	2	1	35.38	14095	7	5	1	5	1	45	3	1		1	1		1	1		1		0	0	0	0	1	0	0	1	0	388698272	449523680	77273392	48834180	734933632	103448304	129022688	1665747968	2.6766e+06	12446.4	784847
450688	UBP7_MOUSE	Usp7	UBP7_MOUSE		sp|Q6A4J8|UBP7_MOUSE Ubiquitin carboxyl-terminal hydrolase 7 OS=Mus musculus OX=10090 GN=Usp7 PE=1 SV=1	89.435	true	2	1	0	2.54	128475	66	3	3	3	3	4	4	3	3	2	1		2	1		3	1	0	0	0	0	0	0	0	3	0	689786	209835	156612		591155	92044.7		3.09835e+06	36850.8	922781	118628
451548	PGAM1_MOUSE	Pgam1	PGAM1_MOUSE	PGAM2_MOUSE	sp|Q9DBJ1|PGAM1_MOUSE Phosphoglycerate mutase 1 OS=Mus musculus OX=10090 GN=Pgam1 PE=1 SV=3	302.396	true	2	1	1	41.34	28832	15	7	7	8	8	13	13	8	3	2	7		6	6		7	2	0	1	0	0	5	0	0	6	1	804065	750481	4864032		10659539	1.98932e+06		23641404	1.46708e+06	171021	79999.5
451628	NUMA1_MOUSE	Numa1	NUMA1_MOUSE		sp|E9Q7G0|NUMA1_MOUSE Nuclear mitotic apparatus protein 1 OS=Mus musculus OX=10090 GN=Numa1 PE=1 SV=1	139.434	true	2	1	0	2.15	235630	137	4	4	4	4	5	5	4	1	4	4	2	4	3		3	2	0	0	2	0	2	0	0	1	0	115348	871441	1.14572e+06	220638	2.1496e+06	451463		1.89004e+06	238403	7548.74	643850
451238	RASA3_MOUSE	Rasa3	RASA3_MOUSE		sp|Q60790|RASA3_MOUSE Ras GTPase-activating protein 3 OS=Mus musculus OX=10090 GN=Rasa3 PE=1 SV=2	28.74	true	2	1	0	0.84	95986	58	1	1	1	1	1	1	1		1	1		1	1		1		0	0	0	0	1	0	0	0	0		96554.4	92436.9		277226	58567.3		153343		12446.4	59920.6
451190	PP2AA_MOUSE	Ppp2ca	PP2AA_MOUSE; PP2AB_MOUSE		sp|P63330|PP2AA_MOUSE Serine/threonine-protein phosphatase 2A catalytic subunit alpha isoform OS=Mus musculus OX=10090 GN=Ppp2ca PE=1 SV=1	41.266	true	2	2	0	2.59	35608	18	1	1	1	1	1	1	1					1			1		0	0	0	0	1	0	0	0	0					365330			10052.5		12446.4	12408.4
451765	CPSF3_MOUSE	Cpsf3	CPSF3_MOUSE		sp|Q9QXK7|CPSF3_MOUSE Cleavage and polyadenylation specificity factor subunit 3 OS=Mus musculus OX=10090 GN=Cpsf3 PE=1 SV=2	22.587	true	2	1	0	1.32	77504	38	1	1	1	1	1	1	1	1	1			1			1		0	0	0	0	1	0	0	0	0	69588.9	138558			204273			389166		69588.9	85987.4
451492	PRP31_MOUSE	Prpf31	PRP31_MOUSE		sp|Q8CCF0|PRP31_MOUSE U4/U6 small nuclear ribonucleoprotein Prp31 OS=Mus musculus OX=10090 GN=Prpf31 PE=1 SV=3	2.923	true	2	1	0	1.4	55430	24	1	1	1	1	2	2	1		1	1		1	1		1	1	0	0	0	0	0	1	0	1	0		268030	269777		646529	508082		526356	30612.1	12446.4	166336
452140	WDR26_MOUSE	Wdr26	WDR26_MOUSE		sp|Q8C6G8|WDR26_MOUSE WD repeat-containing protein 26 OS=Mus musculus OX=10090 GN=Wdr26 PE=1 SV=3	85.022	true	2	1	0	4.99	70543	34	3	3	3	3	3	3	3	2	1	3		2	1		3		0	0	0	0	0	0	0	3	0	565515	189462	410927		602645	874934		1946599		273684	16113.6
451788	UN93B_MOUSE	Unc93b1	UN93B_MOUSE		sp|Q8VCW4|UN93B_MOUSE Protein unc-93 homolog B1 OS=Mus musculus OX=10090 GN=Unc93b1 PE=1 SV=2	30.2	true	2	1	0	1.34	66981	20	1	1	1	1	1	1	1		1	1		1	1		1	1	0	1	0	0	0	0	0	0	0		349764	194439		1.10828e+06	154212		547290	27419.1	12446.4	217060
451537	CO4B_MOUSE	C4b	CO4B_MOUSE		sp|P01029|CO4B_MOUSE Complement C4-B OS=Mus musculus OX=10090 GN=C4b PE=1 SV=3	22.166	true	2	1	0	0.4	192913	94	1	1	1	1	2	2	1		1	1					1	1	0	1	0	0	0	0	0	1	0		726567	265766					779550	54566.1	12446.4	450899
451821	SAHH2_MOUSE	Ahcyl1	SAHH2_MOUSE	SAHH3_MOUSE	sp|Q80SW1|SAHH2_MOUSE S-adenosylhomocysteine hydrolase-like protein 1 OS=Mus musculus OX=10090 GN=Ahcyl1 PE=1 SV=1	121.621	true	2	1	1	5.47	58951	33	3	3	4	4	6	6	4	2	2	3	2	2	2		4	2	0	0	0	1	0	1	0	4	0	1.04897e+06	1.49828e+06	916132	423723	1.95732e+06	806368		8818892	92374.3	386518	433063
450740	DBNL_MOUSE	Dbnl	DBNL_MOUSE		sp|Q62418|DBNL_MOUSE Drebrin-like protein OS=Mus musculus OX=10090 GN=Dbnl PE=1 SV=2	107.324	true	2	1	0	9.17	48700	24	3	3	3	3	4	4	3	1	1	3	1	2	1		2		1	0	1	0	2	0	0	0	0	289840	231191	306879	209668	817372	23028.2		1116196		53838.2	30070.4
450719	1433F_MOUSE	Ywhah	1433F_MOUSE		sp|P68510|1433F_MOUSE 14-3-3 protein eta OS=Mus musculus OX=10090 GN=Ywhah PE=1 SV=2	198.523	true	2	1	0	22.36	28212	18	6	2	6	2	17	5	2	1	2	2	2	2	2		2	2	0	1	0	0	0	1	0	2	1	6.56383e+06	15480284	10078474	460231	30070898	8.02959e+06	485323	360384608	4962850	40111.3	867824
450640	PRPS1_MOUSE	Prps1	PRPS1_MOUSE		sp|Q9D7G0|PRPS1_MOUSE Ribose-phosphate pyrophosphokinase 1 OS=Mus musculus OX=10090 GN=Prps1 PE=1 SV=4	21.774	true	2	1	0	2.2	34834	19	1	1	1	1	1	1	1		1	1	1	1	1		1	1	0	0	0	0	1	0	0	0	0		207834	118566	13144.2	373676	99662.9		269845	19954.7	12446.4	128979
451489	STRAP_MOUSE	Strap	STRAP_MOUSE		sp|Q9Z1Z2|STRAP_MOUSE Serine-threonine kinase receptor-associated protein OS=Mus musculus OX=10090 GN=Strap PE=1 SV=2	49.685	true	2	1	0	3.14	38442	24	1	1	1	1	3	3	1	1	1	1	1	1	1	1	1	1	1	0	0	0	1	0	0	0	1	446240	423946	403228	377043	943153	301847	5566.95	2.96317e+06	310609	446240	263096
452034	PSB3_MOUSE	Psmb3	PSB3_MOUSE		sp|Q9R1P1|PSB3_MOUSE Proteasome subunit beta type-3 OS=Mus musculus OX=10090 GN=Psmb3 PE=1 SV=1	22.661	true	2	1	0	7.8	22965	9	2	2	2	2	3	3	2	2	2	2	1	2	2	1	2	1	0	0	1	0	1	0	0	1	0	174112	2.7434e+06	1.45517e+06	137891	3.98906e+06	1.85095e+06	5613.38	9510508	16597.1	115735	1.07091e+06
451859	SRSF2_MOUSE	Srsf2	SRSF2_MOUSE		sp|Q62093|SRSF2_MOUSE Serine/arginine-rich splicing factor 2 OS=Mus musculus OX=10090 GN=Srsf2 PE=1 SV=4	61.316	true	2	1	0	6.79	25476	11	2	2	2	2	5	5	2	2	2	2	2	2	2	1	2	2	0	1	1	0	1	1	0	1	0	1.64341e+06	4867654	3.07744e+06	1.14858e+06	10304577	3.62327e+06	53286.6	9671934	1.39185e+06	1.6098e+06	2.42248e+06
451880	GLTP_MOUSE	Gltp	GLTP_MOUSE		sp|Q9JL62|GLTP_MOUSE Glycolipid transfer protein OS=Mus musculus OX=10090 GN=Gltp PE=1 SV=3	52.204	true	2	1	0	8.13	23690	16	2	2	2	2	2	2	2	2	2	2	1	2	2		2	1	0	0	0	0	0	0	0	2	0	379652	204425	289179	63487.5	667725	137466		9530718	7897.53	295973	99446.1
451894	CO3_MOUSE	C3	CO3_MOUSE		sp|P01027|CO3_MOUSE Complement C3 OS=Mus musculus OX=10090 GN=C3 PE=1 SV=3	85.113	true	2	1	0	1.14	186481	114	2	2	2	2	2	2	2	1	2	2	1	2	2		2	2	1	0	1	0	0	0	0	0	0	5.21475e+06	2398501	1.28163e+06	2.76896e+06	2.02709e+06	665717		1364374	438088	48337.9	2.43744e+06
451203	UBXN1_MOUSE	Ubxn1	UBXN1_MOUSE		sp|Q922Y1|UBXN1_MOUSE UBX domain-containing protein 1 OS=Mus musculus OX=10090 GN=Ubxn1 PE=1 SV=1	23.888	true	2	1	0	3.03	33573	16	1	1	1	1	1	1	1	1	1	1	1	1	1		1	1	1	0	0	0	0	0	0	0	0	71659.8	85222.3	55480	72832.1	55156.7	46311.9		108294	53840.5	71659.8	52888
451861	TBC8B_MOUSE	Tbc1d8b	TBC8B_MOUSE		sp|A3KGB4|TBC8B_MOUSE TBC1 domain family member 8B OS=Mus musculus OX=10090 GN=Tbc1d8b PE=1 SV=1	3.521	true	2	1	0	0.63	127893	57	1	1	1	1	1	1	1		1	1		1	1		1	1	0	0	0	0	0	0	0	1	0		306860	280909		738252	144520		1.12319e+06	16327.4	12446.4	190434
450826	DTD1_MOUSE	Dtd1	DTD1_MOUSE		sp|Q9DD18|DTD1_MOUSE D-aminoacyl-tRNA deacylase 1 OS=Mus musculus OX=10090 GN=Dtd1 PE=1 SV=2	24.8	true	2	1	0	7.18	23384	8	1	1	1	1	1	1	1	1		1			1		1		1	0	0	0	0	0	0	0	0	299928		159697			207405		1.24073e+06		299928	12408.4
451322	PPGB_MOUSE	Ctsa	PPGB_MOUSE		sp|P16675|PPGB_MOUSE Lysosomal protective protein OS=Mus musculus OX=10090 GN=Ctsa PE=1 SV=1	14.86	true	2	1	0	1.48	53844	22	1	1	1	1	1	1	1	1		1	1	1				1	0	0	0	0	1	0	0	0	0	234590		446124	45591.8	1.07326e+06				202593	234590	12408.4
450965	RS27A_MOUSE	Rps27a	RS27A_MOUSE	RL40_MOUSE; UBB_MOUSE; UBC_MOUSE	sp|P62983|RS27A_MOUSE Ubiquitin-40S ribosomal protein S27a OS=Mus musculus OX=10090 GN=Rps27a PE=1 SV=2	281.928	true	2	1	3	36.54	17951	11	6	6	6	6	35	35	6	5	4	6	4	6	5	3	6	3	4	3	2	6	2	1	2	13	2	41963352	41041656	22680424	2468979	51506728	21988216	5.26142e+06	307584096	2.1466e+06	45680908	17862704
451552	MOGS_MOUSE	Mogs	MOGS_MOUSE		sp|Q80UM7|MOGS_MOUSE Mannosyl-oligosaccharide glucosidase OS=Mus musculus OX=10090 GN=Mogs PE=1 SV=1	9.096	true	2	1	0	0.84	91831	41	1	1	1	1	1	1	1	1	1	1	1	1	1		1	1	0	0	0	0	0	0	0	1	0	49046.8	248199	464214	426844	1.26556e+06	420862		848299	112808	49046.8	154030
451389	ECHM_MOUSE	Echs1	ECHM_MOUSE		sp|Q8BH95|ECHM_MOUSE Enoyl-CoA hydratase, mitochondrial OS=Mus musculus OX=10090 GN=Echs1 PE=1 SV=1	74.165	true	2	1	0	6.9	31474	18	2	2	2	2	3	3	2	1	2	2	1	1	1	1	2	1	1	0	0	1	0	0	0	1	0	462561	641147	528130	242068	1.89379e+06	447461	4602.76	2.92164e+06	221881	154208	480870
451507	QCR1_MOUSE	Uqcrc1	QCR1_MOUSE		sp|Q9CZ13|QCR1_MOUSE Cytochrome b-c1 complex subunit 1, mitochondrial OS=Mus musculus OX=10090 GN=Uqcrc1 PE=1 SV=2	66.363	true	2	1	0	7.29	52852	22	2	2	2	2	2	2	2	1	2	1		2	1		2		0	0	0	0	2	0	0	0	0	157999	510240	320038		988647	56450.2		645974		38496	303253
450644	C170B_MOUSE	Cep170b	C170B_MOUSE; CE170_MOUSE		sp|Q80U49|C170B_MOUSE Centrosomal protein of 170 kDa protein B OS=Mus musculus OX=10090 GN=Cep170b PE=1 SV=2	1.363	true	2	2	0	0.44	170821	104	1	1	1	1	1	1	1	1	1	1	1	1	1		1	1	0	0	0	0	0	0	0	1	0	207869	292891	278251	167302	1.26899e+06	332421		3.03595e+06	93000.6	207869	181765
450683	TOM34_MOUSE	Tomm34	TOM34_MOUSE		sp|Q9CYG7|TOM34_MOUSE Mitochondrial import receptor subunit TOM34 OS=Mus musculus OX=10090 GN=Tomm34 PE=1 SV=1	33.875	true	2	1	0	2.91	34278	22	1	1	1	1	2	2	1	1	1	1	1	1	1		1	1	0	1	0	0	0	0	0	0	1	59252.9	197869	190632	60725.2	301849	56900.8		276142	134342	59252.9	122795
452113	SRPRA_MOUSE	Srpra	SRPRA_MOUSE		sp|Q9DBG7|SRPRA_MOUSE Signal recognition particle receptor subunit alpha OS=Mus musculus OX=10090 GN=Srpra PE=1 SV=1	28.062	true	2	1	0	1.42	69622	43	1	1	1	1	1	1	1	1	1	1		1	1		1		0	0	0	0	0	0	0	1	0	107236	68814.6	75351		138619	64350.6		700132		107236	42705.5
451335	MPEG1_MOUSE	Mpeg1	MPEG1_MOUSE		sp|A1L314|MPEG1_MOUSE Macrophage-expressed gene 1 protein OS=Mus musculus OX=10090 GN=Mpeg1 PE=1 SV=1	44.875	true	2	1	0	2.66	78390	31	2	2	2	2	3	3	2	1	1	2		2			1		0	1	0	0	2	0	0	0	0	118762	494295	298566		1.7625e+06			218871		45520.5	5536.7
451589	GSTP1_MOUSE	Gstp1	GSTP1_MOUSE; GSTP2_MOUSE		sp|P19157|GSTP1_MOUSE Glutathione S-transferase P 1 OS=Mus musculus OX=10090 GN=Gstp1 PE=1 SV=2	53.159	true	2	2	0	5.24	23609	12	1	1	1	1	2	2	1	1	1	1			1		1		0	1	0	0	0	0	0	1	0	181529	283014	192487			2.31486e+06		12136512		181529	175635
451838	RS4X_MOUSE	Rps4x	RS4X_MOUSE		sp|P62702|RS4X_MOUSE 40S ribosomal protein S4, X isoform OS=Mus musculus OX=10090 GN=Rps4x PE=1 SV=2	360.716	true	2	1	0	34.22	29597	21	11	11	11	11	25	25	11	4	5	9	3	6	7	2	8	6	1	2	5	2	4	1	1	7	2	5.5087e+06	8026897	26787652	1.89386e+06	14627893	9899582	485125	39798164	4874256	824268	1.39742e+06
451696	RS18_MOUSE	Rps18	RS18_MOUSE		sp|P62270|RS18_MOUSE 40S ribosomal protein S18 OS=Mus musculus OX=10090 GN=Rps18 PE=1 SV=3	265.949	true	2	1	0	34.87	17718	12	6	6	7	7	20	20	7	5	6	6	5	6	5	3	5	4	2	2	2	1	3	0	2	5	3	3.37104e+06	7335389	6.95678e+06	1.18797e+06	19033386	4990633	1.39079e+06	19659304	6061001	6.06136e+06	6042272
451373	GSLG1_MOUSE	Glg1	GSLG1_MOUSE		sp|Q61543|GSLG1_MOUSE Golgi apparatus protein 1 OS=Mus musculus OX=10090 GN=Glg1 PE=1 SV=1	90.376	true	2	1	0	2.98	133734	68	4	4	4	4	4	4	4	4	4	4	2	4	4	1	4	3	0	1	0	0	0	0	0	3	0	586382	1.11596e+06	1.17669e+06	349882	2.70133e+06	885607	89720.5	4619889	335699	399230	736254
451202	NICA_MOUSE	Ncstn	NICA_MOUSE		sp|P57716|NICA_MOUSE Nicastrin OS=Mus musculus OX=10090 GN=Ncstn PE=1 SV=3	25.341	true	2	1	0	1.27	78492	37	1	1	1	1	1	1	1		1	1		1	1		1		0	0	0	0	1	0	0	0	0		103302	133230		286264	94459		204305		12446.4	64108.2
451233	PRDX6_MOUSE	Prdx6	PRDX6_MOUSE		sp|O08709|PRDX6_MOUSE Peroxiredoxin-6 OS=Mus musculus OX=10090 GN=Prdx6 PE=1 SV=3	131.289	true	2	1	0	24.11	24871	16	5	5	5	5	11	11	5	1	4	4		3	4		5	2	1	1	2	0	1	1	0	4	1	499350	3.06864e+06	3.45433e+06		3.78531e+06	2.28536e+06		25756568	737133	30166.5	2.36909e+06
450885	PSB1_MOUSE	Psmb1	PSB1_MOUSE		sp|O09061|PSB1_MOUSE Proteasome subunit beta type-1 OS=Mus musculus OX=10090 GN=Psmb1 PE=1 SV=1	65.875	true	2	1	0	7.92	26372	14	2	2	2	2	4	4	2	1	2	2		2	2		2	1	1	1	0	0	1	1	0	0	0	810700	3.36555e+06	1.47063e+06		3612804	1.88813e+06		7389701	104097	8032.06	2.21185e+06
450723	WWP2_MOUSE	Wwp2	WWP2_MOUSE		sp|Q9DBH0|WWP2_MOUSE NEDD4-like E3 ubiquitin-protein ligase WWP2 OS=Mus musculus OX=10090 GN=Wwp2 PE=1 SV=1	178.806	true	2	1	0	6.67	98761	55	6	5	6	5	11	9	5	2	2	5	2	3	3	1	5	1	1	1	0	0	1	1	0	5	0	925016	940830	2.32485e+06	420137	5.87813e+06	1.30765e+06	43623.8	6.52899e+06	83350.2	80703.9	57181.6
450563	K1C23_MOUSE	Krt23	K1C23_MOUSE		sp|Q99PS0|K1C23_MOUSE Keratin, type I cytoskeletal 23 OS=Mus musculus OX=10090 GN=Krt23 PE=1 SV=1	151.101	true	2	1	0	6.4	48027	32	3	2	4	2	36	3	2	1	1	1	1	1	1	1	1		0	0	0	0	0	0	1	2	0	8230148	10760352	572223	4338083	5608926	9237840	1.3424e+06	38163180	2.60812e+06	940347	903884
451096	ENOB_MOUSE	Eno3	ENOB_MOUSE		sp|P21550|ENOB_MOUSE Beta-enolase OS=Mus musculus OX=10090 GN=Eno3 PE=1 SV=3	126.756	true	2	1	0	7.6	47025	29	2	1	2	1	4	1	1		1	1		1	1		1		0	0	0	0	0	0	0	1	0	880273	2.34651e+06	653088		2.85616e+06	760492		9322774		12446.4	82525
451248	RALY_MOUSE	Raly	RALY_MOUSE		sp|Q64012|RALY_MOUSE RNA-binding protein Raly OS=Mus musculus OX=10090 GN=Raly PE=1 SV=3	214.448	true	2	1	0	17.63	33188	19	7	7	7	7	12	12	7	4	4	5	3	5	6	3	5	6	1	1	2	1	1	2	0	3	1	3.04664e+06	3542819	4372795	1.41114e+06	12682962	7.78057e+06	100584	12681060	3568535	3147126	1.80179e+06
451519	CAN1_MOUSE	Capn1	CAN1_MOUSE		sp|O35350|CAN1_MOUSE Calpain-1 catalytic subunit OS=Mus musculus OX=10090 GN=Capn1 PE=1 SV=1	48.529	true	2	1	0	2.38	82106	45	2	2	2	2	3	3	2	1	2	2	1	2	2		2	1	0	1	1	0	1	0	0	0	0	124756	541462	345146	46849.2	850570	316797		2255944	8122.74	7692.6	357570
450886	NSF1C_MOUSE	Nsfl1c	NSF1C_MOUSE		sp|Q9CZ44|NSF1C_MOUSE NSFL1 cofactor p47 OS=Mus musculus OX=10090 GN=Nsfl1c PE=1 SV=1	55.308	true	2	1	0	5.95	40710	25	2	2	2	2	5	5	2	1	2	2		2	2		2		0	1	0	0	1	1	0	2	0	28491.6	504738	329005		1.14067e+06	334967		3.32959e+06		18819.6	234088
451450	EIF3B_MOUSE	Eif3b	EIF3B_MOUSE		sp|Q8JZQ9|EIF3B_MOUSE Eukaryotic translation initiation factor 3 subunit B OS=Mus musculus OX=10090 GN=Eif3b PE=1 SV=1	104.438	true	2	1	0	3.86	91370	40	3	3	3	3	5	5	3		2	3	1	3	3		3		0	0	0	0	1	1	0	3	0		786183	466872	88783.3	1.27394e+06	301806		4.38142e+06		12446.4	431412
452025	IMP3_MOUSE	Imp3	IMP3_MOUSE		sp|Q921Y2|IMP3_MOUSE U3 small nucleolar ribonucleoprotein protein IMP3 OS=Mus musculus OX=10090 GN=Imp3 PE=2 SV=1	43.462	true	2	1	0	4.35	21776	11	1	1	1	1	1	1	1	1	1	1	1	1	1		1	1	0	0	0	1	0	0	0	0	0	105756	78127.3	79236.4	106623	145695	40270.6		324102	30492	105756	48484.9
451199	UGGG1_MOUSE	Uggt1	UGGG1_MOUSE		sp|Q6P5E4|UGGG1_MOUSE UDP-glucose:glycoprotein glucosyltransferase 1 OS=Mus musculus OX=10090 GN=Uggt1 PE=1 SV=4	30.885	true	2	1	0	0.58	176434	86	1	1	1	1	1	1	1	1		1		1	1		1		0	0	0	0	0	0	0	1	0	207674		118537		251743	64858.8		563272		207674	12408.4
451637	SF3B6_MOUSE	Sf3b6	SF3B6_MOUSE		sp|P59708|SF3B6_MOUSE Splicing factor 3B subunit 6 OS=Mus musculus OX=10090 GN=Sf3b6 PE=1 SV=1	22.925	true	2	1	0	5.6	14584	8	1	1	1	1	1	1	1	1	1	1	1	1	1		1	1	0	0	0	0	0	0	0	1	0	82889.8	280090	193227	156823	499549	243551		569752	117586	82889.8	173821
450913	WDR82_MOUSE	Wdr82	WDR82_MOUSE		sp|Q8BFQ4|WDR82_MOUSE WD repeat-containing protein 82 OS=Mus musculus OX=10090 GN=Wdr82 PE=1 SV=1	13.127	true	2	1	0	2.24	35079	20	1	1	1	1	1	1	1	1		1	1	1	1		1	1	0	0	0	0	0	0	0	1	0	60285.9		141389	23649.1	312326	102728		472774	5328.39	60285.9	12408.4
451990	TOM70_MOUSE	Tomm70	TOM70_MOUSE		sp|Q9CZW5|TOM70_MOUSE Mitochondrial import receptor subunit TOM70 OS=Mus musculus OX=10090 GN=Tomm70 PE=1 SV=2	102.217	true	2	1	0	3.93	67590	34	3	3	3	3	3	3	3	1	2	3	1	2	3	1	3	1	0	1	0	0	1	0	0	1	0	135796	720768	648184	28821.1	1.06324e+06	528093	16874.4	2.73466e+06	211302	23579.9	472565
451243	OTUB1_MOUSE	Otub1	OTUB1_MOUSE		sp|Q7TQI3|OTUB1_MOUSE Ubiquitin thioesterase OTUB1 OS=Mus musculus OX=10090 GN=Otub1 PE=1 SV=2	39.208	true	2	1	0	5.54	31270	16	1	1	1	1	1	1	1	1	1	1		1	1		1	1	0	0	0	0	1	0	0	0	0	166681	114333	77507.5		339310	89934.9		1540161	14028.5	166681	70953.9
451295	LAMP1_MOUSE	Lamp1	LAMP1_MOUSE		sp|P11438|LAMP1_MOUSE Lysosome-associated membrane glycoprotein 1 OS=Mus musculus OX=10090 GN=Lamp1 PE=1 SV=2	58.527	true	2	1	0	2.71	43865	18	1	1	1	1	2	2	1	1	1	1	1	1	1	1	1	1	0	0	0	1	1	0	0	0	0	2889597	848045	1.69285e+06	2.09972e+06	3.63181e+06	1156388	38688.7	8146086	735210	2889597	526287
451787	AMPD2_MOUSE	Ampd2	AMPD2_MOUSE		sp|Q9DBT5|AMPD2_MOUSE AMP deaminase 2 OS=Mus musculus OX=10090 GN=Ampd2 PE=1 SV=1	23.045	true	2	1	0	0.88	92024	44	1	1	1	1	1	1	1	1	1	1	1	1	1		1	1	0	0	0	0	1	0	0	0	0	132462	91782.8	128363	96369	249822	80622.9		307420	73552.1	132462	56959.4
451849	MTNA_MOUSE	Mri1	MTNA_MOUSE		sp|Q9CQT1|MTNA_MOUSE Methylthioribose-1-phosphate isomerase OS=Mus musculus OX=10090 GN=Mri1 PE=1 SV=1	33.415	true	2	1	0	2.98	39411	23	1	1	1	1	2	2	1	1	1	1	1	1	1		1	1	0	0	0	0	1	0	0	1	0	136883	182437	89433.7	119223	243606	186337		721210	44700.5	136883	113219
451304	ITA2B_MOUSE	Itga2b	ITA2B_MOUSE		sp|Q9QUM0|ITA2B_MOUSE Integrin alpha-IIb OS=Mus musculus OX=10090 GN=Itga2b PE=1 SV=2	6.248	true	2	1	0	0.77	112676	47	1	1	1	1	1	1	1			1		1	1		1		0	0	1	0	0	0	0	0	0			417927		101639	119050		113675		12446.4	12408.4
451400	RUVB2_MOUSE	Ruvbl2	RUVB2_MOUSE		sp|Q9WTM5|RUVB2_MOUSE RuvB-like 2 OS=Mus musculus OX=10090 GN=Ruvbl2 PE=1 SV=3	51.422	true	2	1	0	4.75	51113	29	2	2	2	2	3	3	2	1	2	2	1	2	2		2	1	0	0	0	0	1	0	0	2	0	371560	798378	627321	221114	1722661	446034		2.84059e+06	142341	38801.7	555903
450533	K22E_MOUSE	Krt2	K22E_MOUSE		sp|Q3TTY5|K22E_MOUSE Keratin, type II cytoskeletal 2 epidermal OS=Mus musculus OX=10090 GN=Krt2 PE=1 SV=1	496.357	true	2	1	0	10.89	70923	43	13	7	14	8	289	238	8	7	6	6	6	6	6	6	5	6	20	24	20	34	11	20	51	18	40	1377440128	1279324416	893409280	610431104	514993440	704946112	587351552	824901184	129931456	1155635200	504894976
451491	ARFG2_MOUSE	Arfgap2	ARFG2_MOUSE		sp|Q99K28|ARFG2_MOUSE ADP-ribosylation factor GTPase-activating protein 2 OS=Mus musculus OX=10090 GN=Arfgap2 PE=1 SV=1	31.287	true	2	1	0	1.92	56597	30	1	1	1	1	1	1	1		1	1		1			1		0	0	0	0	0	0	0	1	0		235068	231233		442335			717364		12446.4	145881
450658	GPD1L_MOUSE	Gpd1l	GPD1L_MOUSE		sp|Q3ULJ0|GPD1L_MOUSE Glycerol-3-phosphate dehydrogenase 1-like protein OS=Mus musculus OX=10090 GN=Gpd1l PE=1 SV=2	21.347	true	2	1	0	1.99	38226	26	1	1	1	1	1	1	1	1	1			1			1		0	0	0	0	1	0	0	0	0	97512	81323.9			229247			243057		97512	50468.7
450926	PHB_MOUSE	Phb	PHB_MOUSE		sp|P67778|PHB_MOUSE Prohibitin OS=Mus musculus OX=10090 GN=Phb PE=1 SV=1	276.343	true	2	1	0	34.93	29820	19	9	9	9	9	14	14	9	4	6	7	3	7	6	2	8	5	1	0	3	0	3	1	0	5	1	1.27848e+06	3.38933e+06	2.59957e+06	588354	6636438	1.85841e+06	30816	17977850	1.62129e+06	919047	2.3306e+06
451799	VATA_MOUSE	Atp6v1a	VATA_MOUSE		sp|P50516|VATA_MOUSE V-type proton ATPase catalytic subunit A OS=Mus musculus OX=10090 GN=Atp6v1a PE=1 SV=2	256.297	true	2	1	0	14.75	68326	38	9	9	9	9	12	12	9	4	5	6	2	7	3		9	4	1	1	1	0	2	0	0	7	0	1421411	2284694	3.15074e+06	717058	5304238	1.20943e+06		28520486	562208	388707	559543
450629	LUC7L_MOUSE	Luc7l	LUC7L_MOUSE		sp|Q9CYI4|LUC7L_MOUSE Putative RNA-binding protein Luc7-like 1 OS=Mus musculus OX=10090 GN=Luc7l PE=1 SV=2	121.136	true	2	1	0	11.05	43934	20	4	1	4	1	7	1	1		1	1			1		1		0	0	0	0	0	0	0	1	0	60441.1	738091	6444014	42463.4	5.57142e+06	4125156	137285	9011980	1308327	12446.4	111037
451941	RS3A_MOUSE	Rps3a	RS3A_MOUSE		sp|P97351|RS3A_MOUSE 40S ribosomal protein S3a OS=Mus musculus OX=10090 GN=Rps3a PE=1 SV=3	274.562	true	2	1	0	28.41	29885	19	8	8	8	8	19	19	8	5	6	6	6	8	6	3	6	7	2	0	2	2	5	0	1	4	3	7.63076e+06	4.87618e+06	8928646	9356686	15631546	5.26169e+06	290534	17127884	4917967	1.13856e+06	6478944
451542	PRDX3_MOUSE	Prdx3	PRDX3_MOUSE		sp|P20108|PRDX3_MOUSE Thioredoxin-dependent peroxide reductase, mitochondrial OS=Mus musculus OX=10090 GN=Prdx3 PE=1 SV=1	22.822	true	2	1	0	3.89	28127	17	1	1	1	1	1	1	1	1	1	1	1	1	1		1	1	0	0	0	0	0	0	0	1	0	153778	102884	130400	50101.2	379296	145141		832205	33706.8	153778	63848.3
450768	MLRS_MOUSE	Mylpf	MLRS_MOUSE		sp|P97457|MLRS_MOUSE Myosin regulatory light chain 2, skeletal muscle isoform OS=Mus musculus OX=10090 GN=Mylpf PE=1 SV=3	41.272	true	2	1	0	11.83	18955	12	2	2	2	2	2	2	1			1		1	1		1	1	0	0	1	0	0	0	0	0	0			852277		14748.8	16957.7		45701.1	63008.2	12446.4	12408.4
451918	ARPC4_MOUSE	Arpc4	ARPC4_MOUSE		sp|P59999|ARPC4_MOUSE Actin-related protein 2/3 complex subunit 4 OS=Mus musculus OX=10090 GN=Arpc4 PE=1 SV=3	156.899	true	2	1	0	22.62	19667	14	4	4	4	4	12	12	4	2	4	4	1	4	3	1	4	2	2	1	1	0	2	0	0	4	2	3.23726e+06	6.51939e+06	6019821	424111	14948757	4.01538e+06	129350	39377996	1.71232e+06	141693	5339506
451204	ELAV1_MOUSE	Elavl1	ELAV1_MOUSE		sp|P70372|ELAV1_MOUSE ELAV-like protein 1 OS=Mus musculus OX=10090 GN=Elavl1 PE=1 SV=2	181.242	true	2	1	0	12.88	36169	18	4	4	4	4	8	8	4	1	3	3	1	3	3		3	3	0	1	0	0	3	1	0	2	1	1.52369e+06	1.84539e+06	2374154	588117	5416900	1.19843e+06		3648128	567509	29047.7	1.64589e+06
452157	SNF8_MOUSE	Snf8	SNF8_MOUSE		sp|Q9CZ28|SNF8_MOUSE Vacuolar-sorting protein SNF8 OS=Mus musculus OX=10090 GN=Snf8 PE=1 SV=1	50.759	true	2	1	0	4.65	28885	10	1	1	1	1	1	1	1		1	1		1			1		0	0	0	0	0	0	0	1	0		408138	97619.4		1.13575e+06			507647		12446.4	253286
450804	KPYM_MOUSE	Pkm	KPYM_MOUSE	KPYR_MOUSE	sp|P52480|KPYM_MOUSE Pyruvate kinase PKM OS=Mus musculus OX=10090 GN=Pkm PE=1 SV=4	836.706	true	2	1	1	48.59	57845	38	21	21	22	22	50	50	22	7	18	15	6	13	14	5	17	12	3	10	5	1	5	4	2	12	7	10717695	37398036	23960122	5.44262e+06	66049228	21584802	1.36643e+06	138933408	19394398	1.83887e+06	35232964
451010	CCD47_MOUSE	Ccdc47	CCD47_MOUSE		sp|Q9D024|CCD47_MOUSE Coiled-coil domain-containing protein 47 OS=Mus musculus OX=10090 GN=Ccdc47 PE=1 SV=2	50.718	true	2	1	0	4.76	55844	22	2	2	2	2	2	2	2	2	2	2		1	2		2		0	0	0	0	0	0	0	2	0	211397	116495	112329		117585	66678.8		1.03072e+06		115274	67218.3
451127	COX2_MOUSE	Mtco2	COX2_MOUSE		sp|P00405|COX2_MOUSE Cytochrome c oxidase subunit 2 OS=Mus musculus OX=10090 GN=Mtco2 PE=1 SV=1	40.011	true	2	1	0	7.49	25976	8	2	2	2	2	3	3	2	1	2	2	1	2	2	1	2	1	0	1	0	0	2	0	0	0	0	77407.3	1.43712e+06	2.32576e+06	107755	4.62891e+06	2.03462e+06	4348.58	2.81367e+06	598015	46569.6	1.03753e+06
451438	RL19_MOUSE	Rpl19	RL19_MOUSE		sp|P84099|RL19_MOUSE 60S ribosomal protein L19 OS=Mus musculus OX=10090 GN=Rpl19 PE=1 SV=1	131.568	true	2	1	0	18.37	23465	9	3	3	3	3	23	23	3	2	2	2	2	1	2	1	2	2	2	2	2	9	1	0	3	0	4	8200233	12885992	40694364	1518095	22750784	8658946	1.50929e+06	20086618	2.23421e+06	1.75854e+06	9907545
451869	QCR9_MOUSE	Uqcr10	QCR9_MOUSE		sp|Q8R1I1|QCR9_MOUSE Cytochrome b-c1 complex subunit 9 OS=Mus musculus OX=10090 GN=Uqcr10 PE=1 SV=1	66.341	true	2	1	0	26.56	7446	4	1	1	1	1	1	1	1		1	1		1	1		1		0	0	0	0	1	0	0	0	0		186445	202186		540917	123993		472268		12446.4	115705
451309	SAM50_MOUSE	Samm50	SAM50_MOUSE		sp|Q8BGH2|SAM50_MOUSE Sorting and assembly machinery component 50 homolog OS=Mus musculus OX=10090 GN=Samm50 PE=1 SV=1	17.187	true	2	1	0	1.49	51864	34	1	1	1	1	1	1	1	1	1	1		1	1		1		0	0	0	0	0	0	0	1	0	45834.7	74298.9	143167		192659	98295.5		490414		45834.7	46109
452055	NIBA2_MOUSE	Niban2	NIBA2_MOUSE		sp|Q8R1F1|NIBA2_MOUSE Protein Niban 2 OS=Mus musculus OX=10090 GN=Niban2 PE=1 SV=2	136.383	true	2	1	0	3.87	84819	46	3	3	3	3	6	6	3	3	3	3	2	3	2		3	2	1	0	1	0	1	0	0	3	0	464286	573927	563350	267900	1.56056e+06	444753		9013147	138267	457969	363582
451520	STIP1_MOUSE	Stip1	STIP1_MOUSE		sp|Q60864|STIP1_MOUSE Stress-induced-phosphoprotein 1 OS=Mus musculus OX=10090 GN=Stip1 PE=1 SV=1	153.981	true	2	1	0	7.73	62582	41	4	4	4	4	6	6	4	3	4	4	2	4	4	1	4	3	0	0	1	0	2	0	0	2	1	757015	1.71095e+06	1.5725e+06	82794.4	4.29975e+06	1.23243e+06	3979.81	4.83913e+06	1.15669e+06	574238	931070
450714	SYK_MOUSE	Kars1	SYK_MOUSE		sp|Q99MN1|SYK_MOUSE Lysine--tRNA ligase OS=Mus musculus OX=10090 GN=Kars1 PE=1 SV=1	39.633	true	2	1	0	2.35	67840	32	2	2	2	2	2	2	2		2	2	1	2	1		2		0	0	0	0	1	0	0	1	0		319295	242880	5256.37	673616	187640		889880		12446.4	203185
451748	PTPA_MOUSE	Ptpa	PTPA_MOUSE		sp|P58389|PTPA_MOUSE Serine/threonine-protein phosphatase 2A activator OS=Mus musculus OX=10090 GN=Ptpa PE=1 SV=1	18.897	true	2	1	0	3.1	36710	21	1	1	1	1	1	1	1		1	1		1	1		1		0	1	0	0	0	0	0	0	0		184219	181083		440782	117471		412408		12446.4	114324
450958	H31_MOUSE	H3c1	H31_MOUSE; H32_MOUSE	H33_MOUSE; H3C_MOUSE	sp|P68433|H31_MOUSE Histone H3.1 OS=Mus musculus OX=10090 GN=H3c1 PE=1 SV=2	123.143	true	2	2	2	20.59	15404	6	4	4	4	4	29	29	4	3	4	3	3	4	3	1	4	4	2	4	3	8	4	1	0	5	2	65873488	144650320	29703544	38232692	574777088	38370632	3086.31	1443596032	17945180	24677324	15669782
450774	SAP3_MOUSE	Gm2a	SAP3_MOUSE		sp|Q60648|SAP3_MOUSE Ganglioside GM2 activator OS=Mus musculus OX=10090 GN=Gm2a PE=1 SV=2	11.681	true	2	1	0	3.63	20824	10	1	1	1	1	1	1	1		1	1		1	1		1	1	0	0	0	0	0	1	0	0	0		529615	594846		1440579	414798		194624	261406	12446.4	328673
451867	IMA1_MOUSE	Kpna2	IMA1_MOUSE		sp|P52293|IMA1_MOUSE Importin subunit alpha-1 OS=Mus musculus OX=10090 GN=Kpna2 PE=1 SV=2	29.366	true	2	1	0	3.4	57928	28	1	1	1	1	1	1	1		1	1		1	1		1		0	0	1	0	0	0	0	0	0		93697.2	124261		222651	49498.9		142392		12446.4	58147.4
450720	1433Z_MOUSE	Ywhaz	1433Z_MOUSE		sp|P63101|1433Z_MOUSE 14-3-3 protein zeta/delta OS=Mus musculus OX=10090 GN=Ywhaz PE=1 SV=1	578.225	true	2	1	0	52.24	27771	19	13	10	14	11	40	34	11	6	7	10	4	9	9	2	11	7	2	4	6	0	3	4	1	11	2	16500917	18145946	16111774	2.41569e+06	54468568	12409385	791435	370920224	7.16153e+06	4616989	6604232
451653	SMC4_MOUSE	Smc4	SMC4_MOUSE		sp|Q8CG47|SMC4_MOUSE Structural maintenance of chromosomes protein 4 OS=Mus musculus OX=10090 GN=Smc4 PE=1 SV=1	91.215	true	2	1	0	1.79	146895	85	2	2	2	2	2	2	2		2	1		2	1		1		0	0	1	0	1	0	0	0	0		316830	217916		1.3196e+06	110517		354664		12446.4	172333
450571	AL5AP_MOUSE	Alox5ap	AL5AP_MOUSE		sp|P30355|AL5AP_MOUSE Arachidonate 5-lipoxygenase-activating protein OS=Mus musculus OX=10090 GN=Alox5ap PE=1 SV=2	33.734	true	2	1	0	4.97	18136	6	1	1	1	1	5	5	1		1	1		1	1		1	1	0	1	1	0	0	1	0	1	1		1.59127e+06	2.08341e+06		5697027	1.41472e+06		1.7096e+06	310556	12446.4	987526
451536	TPSN_MOUSE	Tapbp	TPSN_MOUSE		sp|Q9R233|TPSN_MOUSE Tapasin OS=Mus musculus OX=10090 GN=Tapbp PE=1 SV=2	36.915	true	2	1	0	3.66	49736	22	2	2	2	2	6	6	2	1	2	2		2	2	1	2	1	0	1	2	0	1	1	0	1	0	521671	960338	667003		1.83989e+06	533564	5673.41	1.23803e+06	201353	32376.9	696319
451391	DECR_MOUSE	Decr1	DECR_MOUSE		sp|Q9CQ62|DECR_MOUSE 2,4-dienoyl-CoA reductase, mitochondrial OS=Mus musculus OX=10090 GN=Decr1 PE=1 SV=1	41.385	true	2	1	0	3.88	36214	24	1	1	1	1	2	2	1	1		1		1			1		0	0	0	0	1	0	0	1	0	294805		323105		517718			1855272		294805	12408.4
451720	CN37_MOUSE	Cnp	CN37_MOUSE		sp|P16330|CN37_MOUSE 2',3'-cyclic-nucleotide 3'-phosphodiesterase OS=Mus musculus OX=10090 GN=Cnp PE=1 SV=3	31.222	true	2	1	0	2.14	47123	33	1	1	1	1	2	2	1	1		1			1		1		1	0	0	0	0	0	0	1	0	293843		152513			159198		870257		293843	12408.4
450657	RL11_MOUSE	Rpl11	RL11_MOUSE		sp|Q9CXW4|RL11_MOUSE 60S ribosomal protein L11 OS=Mus musculus OX=10090 GN=Rpl11 PE=1 SV=4	164.349	true	2	1	0	23.6	20252	10	4	4	4	4	9	9	4	2	4	4	1	4	4	1	4	2	0	1	1	0	2	2	0	3	0	2.3117e+06	3067081	6080608	432104	13439228	5991669	2962.9	24789840	2560028	194057	3.85221e+06
452132	RUFY1_MOUSE	Rufy1	RUFY1_MOUSE		sp|Q8BIJ7|RUFY1_MOUSE RUN and FYVE domain-containing protein 1 OS=Mus musculus OX=10090 GN=Rufy1 PE=1 SV=1	103.703	true	2	1	0	4.78	80376	52	4	4	4	4	4	4	4	2	3	4	2	3	4		4	2	0	0	0	0	2	0	0	2	0	311526	694509	386286	180201	840077	573005		2.78195e+06	150121	185514	263323
451125	RS26_MOUSE	Rps26	RS26_MOUSE		sp|P62855|RS26_MOUSE 40S ribosomal protein S26 OS=Mus musculus OX=10090 GN=Rps26 PE=1 SV=3	58.578	true	2	1	0	13.04	13015	6	1	1	1	1	3	3	1			1	1		1				0	0	1	1	0	1	0	0	0			739818	1.44451e+06		1.03824e+06				12446.4	12408.4
452162	CH10_MOUSE	Hspe1	CH10_MOUSE		sp|Q64433|CH10_MOUSE 10 kDa heat shock protein, mitochondrial OS=Mus musculus OX=10090 GN=Hspe1 PE=1 SV=2	107.691	true	2	1	0	31.37	10963	10	3	3	3	3	3	3	3	2	2	3	2	3	3	2	3	2	1	0	1	0	1	0	0	0	0	1353184	1.53138e+06	2562622	318119	8.13024e+06	1928932	26606.3	9578094	735662	974808	327225
451657	GLGB_MOUSE	Gbe1	GLGB_MOUSE		sp|Q9D6Y9|GLGB_MOUSE 1,4-alpha-glucan-branching enzyme OS=Mus musculus OX=10090 GN=Gbe1 PE=1 SV=1	31.475	true	2	1	0	1	80364	42	1	1	1	1	1	1	1	1	1		1	1		1	1		0	0	0	0	0	0	0	1	0	164699	110201		58030.7	167408		3234.22	595501		164699	68389.3
451282	MYH9_MOUSE	Myh9	MYH9_MOUSE	MYH10_MOUSE; MYH11_MOUSE	sp|Q8VDD5|MYH9_MOUSE Myosin-9 OS=Mus musculus OX=10090 GN=Myh9 PE=1 SV=4	4160.4	true	2	1	2	43.83	226372	129	88	84	108	104	313	298	101	44	69	76	36	66	75	15	74	69	10	30	37	17	34	54	1	41	66	33652520	113034848	157870608	42727272	137538240	299425024	632305	230365200	192966160	15279153	72978680
451618	SR140_MOUSE	U2surp	SR140_MOUSE		sp|Q6NV83|SR140_MOUSE U2 snRNP-associated SURP motif-containing protein OS=Mus musculus OX=10090 GN=U2surp PE=1 SV=3	81.936	true	2	1	0	1.65	118261	48	2	2	2	2	5	5	2	1	2	2	2	2	2		2	1	0	1	0	1	2	1	0	0	0	121795	2870516	594245	531560	1.68661e+06	1.31102e+06		1746492	14650.8	14523.6	1.05645e+06
451245	SPTN1_MOUSE	Sptan1	SPTN1_MOUSE		sp|P16546|SPTN1_MOUSE Spectrin alpha chain, non-erythrocytic 1 OS=Mus musculus OX=10090 GN=Sptan1 PE=1 SV=4	389.732	true	2	1	0	4.89	284597	190	11	11	11	11	13	13	11	7	4	10	7	10	9		11	4	0	0	1	0	4	0	0	8	0	1.7387e+06	891634	2.28844e+06	1.06448e+06	3.57699e+06	1.77384e+06		16816838	331300	1.58217e+06	40600
451870	PURB_MOUSE	Purb	PURB_MOUSE		sp|O35295|PURB_MOUSE Transcriptional activator protein Pur-beta OS=Mus musculus OX=10090 GN=Purb PE=1 SV=3	106.632	true	2	1	0	11.11	33901	15	3	3	3	3	4	4	3	2	2	2	2	2	3		3	2	0	0	0	2	0	1	0	1	0	1.6572e+06	829018	440774	1.29994e+06	1.68252e+06	3.67612e+06		2201674	1.46472e+06	1376512	259188
450692	NCF4_MOUSE	Ncf4	NCF4_MOUSE		sp|P97369|NCF4_MOUSE Neutrophil cytosol factor 4 OS=Mus musculus OX=10090 GN=Ncf4 PE=1 SV=2	87.173	true	2	1	0	8.55	38707	25	3	3	3	3	4	4	3		2	3	1	3	1		3	1	0	0	1	0	1	0	0	2	0		485851	851520	260929	1.84113e+06	122586		1.39075e+06	239946	12446.4	239165
450634	TREA_MOUSE	Treh	TREA_MOUSE		sp|Q9JLT2|TREA_MOUSE Trehalase OS=Mus musculus OX=10090 GN=Treh PE=1 SV=1	17.8	true	2	1	0	1.22	65400	34	1	1	1	1	1	1	1	1		1	1	1	1	1	1	1	0	0	0	1	0	0	0	0	0	574690		517411	435375	351554	14941.9	7182.18	208898	184148	574690	12408.4
451981	CGBP1_MOUSE	Cggbp1	CGBP1_MOUSE		sp|Q8BHG9|CGBP1_MOUSE CGG triplet repeat-binding protein 1 OS=Mus musculus OX=10090 GN=Cggbp1 PE=1 SV=1	29.984	true	2	1	0	5.99	18761	12	1	1	1	1	1	1	1	1		1		1	1		1		0	0	0	0	1	0	0	0	0	73752.9		129598		336417	145851		174183		73752.9	12408.4
451333	ABCF1_MOUSE	Abcf1	ABCF1_MOUSE		sp|Q6P542|ABCF1_MOUSE ATP-binding cassette sub-family F member 1 OS=Mus musculus OX=10090 GN=Abcf1 PE=1 SV=1	21.791	true	2	1	0	1.19	94945	43	1	1	1	1	1	1	1	1		1	1		1		1	1	1	0	0	0	0	0	0	0	0	526819		245431	431954		337540		245914	126165	526819	12408.4
451847	SF01_MOUSE	Sf1	SF01_MOUSE		sp|Q64213|SF01_MOUSE Splicing factor 1 OS=Mus musculus OX=10090 GN=Sf1 PE=1 SV=6	39.183	true	2	1	0	1.53	70403	22	1	1	1	1	1	1	1		1	1		1			1		0	0	0	0	1	0	0	0	0		113902	201982		400476			256635		12446.4	70686.2
451044	ARPC2_MOUSE	Arpc2	ARPC2_MOUSE		sp|Q9CVB6|ARPC2_MOUSE Actin-related protein 2/3 complex subunit 2 OS=Mus musculus OX=10090 GN=Arpc2 PE=1 SV=3	236.553	true	2	1	0	25	34357	23	7	7	8	8	10	10	8	5	2	5	3	4	5	2	6	2	2	0	0	0	1	1	0	5	1	3.66993e+06	1.80269e+06	3.56129e+06	375124	7955022	2.0507e+06	26236.8	24200184	325723	4854043	50829.5
450599	AURKA_MOUSE	Aurka	AURKA_MOUSE; AURKB_MOUSE		sp|P97477|AURKA_MOUSE Aurora kinase A OS=Mus musculus OX=10090 GN=Aurka PE=1 SV=1	22.58	true	2	2	0	2.03	44771	27	1	1	1	1	1	1	1	1		1		1	1		1	1	0	0	0	0	0	0	0	1	0	87393.3		186397		275578	35996.5		289359	13245.6	87393.3	12408.4
450736	SEH1_MOUSE	Seh1l	SEH1_MOUSE		sp|Q8R2U0|SEH1_MOUSE Nucleoporin SEH1 OS=Mus musculus OX=10090 GN=Seh1l PE=2 SV=1	25.993	true	2	1	0	1.94	39775	22	1	1	1	1	1	1	1	1	1	1	1	1		1	1	1	0	0	0	0	0	0	0	1	0	219810	252570	86559.1	6893.79	354529		3579.31	618329	97841.1	219810	156742
451417	PGM1_MOUSE	Pgm1	PGM1_MOUSE		sp|Q9D0F9|PGM1_MOUSE Phosphoglucomutase-1 OS=Mus musculus OX=10090 GN=Pgm1 PE=1 SV=4	78.716	true	2	1	0	5.87	61418	38	3	3	3	3	3	3	3	3	2	3	1	2	3		3	2	0	0	1	1	0	0	0	1	0	464065	200154	399169	78974.8	563527	293826		4430713	144311	455832	162722
450875	DNJA1_MOUSE	Dnaja1	DNJA1_MOUSE		sp|P63037|DNJA1_MOUSE DnaJ homolog subfamily A member 1 OS=Mus musculus OX=10090 GN=Dnaja1 PE=1 SV=1	28.887	true	2	1	0	3.27	44868	24	1	1	1	1	1	1	1		1	1		1	1		1		0	0	0	0	0	0	0	1	0		217334	167538		818495	138587		400966		12446.4	134875
451266	CBPE_MOUSE	Cpe	CBPE_MOUSE		sp|Q00493|CBPE_MOUSE Carboxypeptidase E OS=Mus musculus OX=10090 GN=Cpe PE=1 SV=2	24.457	true	2	1	0	2.1	53255	28	1	1	1	1	3	3	1	1	1	1	1		1	1	1	1	1	1	0	1	0	0	0	0	0	332099	157632	99712.7	273878		216990	10798.8	217657	99031.8	332099	97824.7
451954	FKB15_MOUSE	Fkbp15	FKB15_MOUSE		sp|Q6P9Q6|FKB15_MOUSE FK506-binding protein 15 OS=Mus musculus OX=10090 GN=Fkbp15 PE=1 SV=2	11.479	true	2	1	0	0.74	132961	63	1	1	1	1	1	1	1		1	1		1	1		1		0	1	0	0	0	0	0	0	0		126382	135420		345538	119015		187824		12446.4	78431.1
451503	RANG_MOUSE	Ranbp1	RANG_MOUSE		sp|P34022|RANG_MOUSE Ran-specific GTPase-activating protein OS=Mus musculus OX=10090 GN=Ranbp1 PE=1 SV=2	47.347	true	2	1	0	4.43	23596	11	1	1	1	1	4	4	1	1	1	1	1	1	1	1	1	1	0	0	0	1	0	1	0	1	1	75024.7	2.47403e+06	1.32336e+06	430306	6404243	1.05163e+06	8680.67	1.97439e+06	631873	75024.7	1.53536e+06
451577	DHPR_MOUSE	Qdpr	DHPR_MOUSE		sp|Q8BVI4|DHPR_MOUSE Dihydropteridine reductase OS=Mus musculus OX=10090 GN=Qdpr PE=1 SV=2	24.932	true	2	1	0	2.9	25570	17	1	1	1	1	1	1	1	1	1	1	1	1	1		1	1	1	0	0	0	0	0	0	0	0	244227	53245.3	355579	139400	731648	282727		1.12041e+06	47225.3	244227	33043.4
451635	K2C80_MOUSE	Krt80	K2C80_MOUSE		sp|Q0VBK2|K2C80_MOUSE Keratin, type II cytoskeletal 80 OS=Mus musculus OX=10090 GN=Krt80 PE=1 SV=1	102.723	true	2	1	0	5.53	50660	34	4	4	4	4	17	17	4	2	3	2	2	3	3	2	2	2	2	1	1	2	3	1	5	1	1	13762284	3.04075e+06	3.31393e+06	8794136	8459263	6040025	2.9317e+06	9739826	1.6347e+06	9009342	11668481
451403	PTPRC_MOUSE	Ptprc	PTPRC_MOUSE		sp|P06800|PTPRC_MOUSE Receptor-type tyrosine-protein phosphatase C OS=Mus musculus OX=10090 GN=Ptprc PE=1 SV=4	92.647	true	2	1	0	2.01	144835	70	3	3	3	3	4	4	3	1	2	3	1	3	3	1	2	1	0	0	2	0	1	0	0	1	0	23376.5	311909	581831	4261.75	1033894	582324	6037.72	698898	142637	17498	285786
451462	PSMD1_MOUSE	Psmd1	PSMD1_MOUSE		sp|Q3TXS7|PSMD1_MOUSE 26S proteasome non-ATPase regulatory subunit 1 OS=Mus musculus OX=10090 GN=Psmd1 PE=1 SV=1	149.48	true	2	1	0	4.51	105730	51	4	4	4	4	5	5	4	2	3	3		4	4	2	4	1	0	0	1	0	2	0	0	2	0	255573	617559	291606		1722718	435040	10575.8	4.46547e+06	24777.9	124439	388682
450619	EMAL4_MOUSE	Eml4	EMAL4_MOUSE		sp|Q3UMY5|EMAL4_MOUSE Echinoderm microtubule-associated protein-like 4 OS=Mus musculus OX=10090 GN=Eml4 PE=1 SV=1	35.554	true	2	1	0	1.92	110025	59	2	2	2	2	2	2	2	2	1	2	1	1	1		1	1	0	0	0	1	0	0	0	1	0	189759	172872	208253	101260	389802	245280		623822	76849.1	193093	66753.6
451215	DYN2_MOUSE	Dnm2	DYN2_MOUSE	DYN1_MOUSE	sp|P39054|DYN2_MOUSE Dynamin-2 OS=Mus musculus OX=10090 GN=Dnm2 PE=1 SV=2	172.61	true	2	1	1	6.78	98145	59	6	5	6	5	6	5	5	4	2	5	1	4	5		5		0	0	0	0	2	0	0	3	0	569028	486446	1.27783e+06	152180	2.19018e+06	650570		6.46486e+06	72747.9	180034	23248.6
450697	PTBP1_MOUSE	Ptbp1	PTBP1_MOUSE	PTPRB_MOUSE	sp|P17225|PTBP1_MOUSE Polypyrimidine tract-binding protein 1 OS=Mus musculus OX=10090 GN=Ptbp1 PE=1 SV=2	242.707	true	2	1	1	17.27	56478	22	7	4	7	4	12	6	4	2	1	2		3	2		2	1	1	0	0	0	3	0	0	2	0	1.18774e+06	4045122	3.9269e+06	39809.7	16916042	4.08256e+06		15433565	2.51416e+06	76342.4	43918.2
451065	PKN1_MOUSE	Pkn1	PKN1_MOUSE		sp|P70268|PKN1_MOUSE Serine/threonine-protein kinase N1 OS=Mus musculus OX=10090 GN=Pkn1 PE=1 SV=3	17.219	true	2	1	0	0.95	104411	51	1	1	1	1	1	1	1		1	1		1					0	0	0	0	1	0	0	0	0		122864	139701		207573					12446.4	76248.2
451831	SERC_MOUSE	Psat1	SERC_MOUSE		sp|Q99K85|SERC_MOUSE Phosphoserine aminotransferase OS=Mus musculus OX=10090 GN=Psat1 PE=1 SV=1	148.019	true	2	1	0	14.86	40473	28	5	5	5	5	7	7	4	1	4	4	1	4	3		3	2	0	0	2	0	2	0	0	2	0	297169	1.65946e+06	1.61284e+06	104875	4.42975e+06	872643		3.68733e+06	79910.9	13366.9	1.02307e+06
451067	COR1A_MOUSE	Coro1a	COR1A_MOUSE		sp|O89053|COR1A_MOUSE Coronin-1A OS=Mus musculus OX=10090 GN=Coro1a PE=1 SV=5	202.036	true	2	1	0	13.45	50989	24	7	7	7	7	15	15	7	4	6	6	2	7	6	1	5	6	0	2	4	2	0	2	0	2	3	6610477	17534030	20404450	1.62349e+06	36520968	13059741	67885.4	27393152	4956812	1467607	4.88241e+06
451214	DYN3_MOUSE	Dnm3	DYN3_MOUSE		sp|Q8BZ98|DYN3_MOUSE Dynamin-3 OS=Mus musculus OX=10090 GN=Dnm3 PE=1 SV=1	36.833	true	2	1	0	1.62	97190	61	2	1	2	1	2	1	1	1	1	1		1	1		1		0	0	0	0	0	0	0	1	0	228682	392706	567833	91421.1	1004458	354686		2.93726e+06	72747.9	32452.7	115832
451668	CSN3_MOUSE	Cops3	CSN3_MOUSE		sp|O88543|CSN3_MOUSE COP9 signalosome complex subunit 3 OS=Mus musculus OX=10090 GN=Cops3 PE=1 SV=3	30.434	true	2	1	0	1.89	47832	27	1	1	1	1	1	1	1	1	1	1	1	1	1		1	1	0	0	0	0	1	0	0	0	0	188970	111831	72726.4	123722	473114	92506.1		280347	57129.1	188970	69400.9
450718	1433G_MOUSE	Ywhag	1433G_MOUSE		sp|P61982|1433G_MOUSE 14-3-3 protein gamma OS=Mus musculus OX=10090 GN=Ywhag PE=1 SV=2	195.272	true	2	1	0	30.36	28302	18	8	3	8	3	17	4	3	2	1	2		3	2		3	1	0	1	0	0	1	0	0	2	0	6763515	15138997	9628355	51640.2	32285288	7.57377e+06	496771	370417664	4925281	828666	82780
452109	EXOS2_MOUSE	Exosc2	EXOS2_MOUSE		sp|Q8VBV3|EXOS2_MOUSE Exosome complex component RRP4 OS=Mus musculus OX=10090 GN=Exosc2 PE=1 SV=1	23.169	true	2	1	0	3.75	32631	18	1	1	1	1	1	1	1	1	1	1		1	1		1		0	0	0	0	0	0	0	1	0	78178.4	83236.1	48981.7		64352	38605.3		249150		78178.4	51655.4
451797	CCAR2_MOUSE	Ccar2	CCAR2_MOUSE		sp|Q8VDP4|CCAR2_MOUSE Cell cycle and apoptosis regulator protein 2 OS=Mus musculus OX=10090 GN=Ccar2 PE=1 SV=2	106.723	true	2	1	0	3.04	103002	54	3	3	3	3	4	4	1		1			1			1		0	1	0	0	0	0	0	1	0		197617			218682			56369.1		12446.4	122639
450949	CHIL3_MOUSE	Chil3	CHIL3_MOUSE	CHIL4_MOUSE	sp|O35744|CHIL3_MOUSE Chitinase-like protein 3 OS=Mus musculus OX=10090 GN=Chil3 PE=1 SV=2	543.876	true	2	1	1	27.39	44458	20	12	12	12	12	27	27	12	5	7	11	3	9	8	2	10	9	3	5	3	0	4	0	0	6	6	5.35292e+06	9704026	15932895	1.30887e+06	21379488	4417428	91072.1	36837008	9998496	2074581	6.64301e+06
450747	GDIR2_MOUSE	Arhgdib	GDIR2_MOUSE		sp|Q61599|GDIR2_MOUSE Rho GDP-dissociation inhibitor 2 OS=Mus musculus OX=10090 GN=Arhgdib PE=1 SV=3	49.616	true	2	1	0	10.5	22851	14	1	1	1	1	2	2	1		1	1		1	1		1		0	0	0	0	1	0	0	1	0		184398	2.78641e+06		6.68724e+06	666304		4.92661e+06		12446.4	114435
450754	ALDH2_MOUSE	Aldh2	ALDH2_MOUSE	AL1A2_MOUSE; AL1A3_MOUSE	sp|P47738|ALDH2_MOUSE Aldehyde dehydrogenase, mitochondrial OS=Mus musculus OX=10090 GN=Aldh2 PE=1 SV=1	338.178	true	2	1	2	17.34	56538	27	8	7	8	7	19	17	7	3	5	5	3	6	5	2	5	7	0	2	4	0	2	2	0	3	3	1.45969e+06	6.38931e+06	7.43371e+06	1.24244e+06	19484542	5352853	12362.4	13611813	3.40986e+06	294720	4448057
451351	TADBP_MOUSE	Tardbp	TADBP_MOUSE		sp|Q921F2|TADBP_MOUSE TAR DNA-binding protein 43 OS=Mus musculus OX=10090 GN=Tardbp PE=1 SV=1	98.41	true	2	1	0	6.76	44548	17	3	3	3	3	6	6	3	2	3	3	2	3	2	1	3	3	0	0	1	1	1	0	0	2	1	481725	1.77722e+06	1.42279e+06	2.81029e+06	6.77506e+06	1.23727e+06	17182.4	2.15019e+06	1.71322e+06	659108	1.39079e+06
451755	BTK_MOUSE	Btk	BTK_MOUSE		sp|P35991|BTK_MOUSE Tyrosine-protein kinase BTK OS=Mus musculus OX=10090 GN=Btk PE=1 SV=4	21.656	true	2	1	0	1.21	76437	44	1	1	1	1	1	1	1	1	1	1	1	1	1		1	1	0	0	0	0	1	0	0	0	0	37379.3	355888	156868	52211	277029	116819		169328	121614	37379.3	220860
451718	GTF2I_MOUSE	Gtf2i	GTF2I_MOUSE		sp|Q9ESZ8|GTF2I_MOUSE General transcription factor II-I OS=Mus musculus OX=10090 GN=Gtf2i PE=1 SV=3	36.727	true	2	1	0	0.9	112265	61	1	1	1	1	1	1	1	1	1	1		1	1		1		0	0	0	0	1	0	0	0	0	66813.7	101236	91109.7		219185	92210.8		458975		66813.7	62825.8
452017	HPCL1_MOUSE	Hpcal1	HPCL1_MOUSE		sp|P62748|HPCL1_MOUSE Hippocalcin-like protein 1 OS=Mus musculus OX=10090 GN=Hpcal1 PE=1 SV=2	7.38	true	2	1	0	4.15	22338	15	1	1	1	1	1	1	1		1	1	1	1			1		0	0	0	0	1	0	0	0	0		162252	205159	41525.2	397447			308001		12446.4	100692
450596	GYS1_MOUSE	Gys1	GYS1_MOUSE		sp|Q9Z1E4|GYS1_MOUSE Glycogen [starch] synthase, muscle OS=Mus musculus OX=10090 GN=Gys1 PE=1 SV=2	29.572	true	2	1	0	1.36	83927	40	1	1	1	1	1	1	1	1	1	1		1			1	1	0	0	0	0	0	0	0	1	0	153772	191663	86993.4		149642			525874	47680.9	153772	118944
451794	GNPI1_MOUSE	Gnpda1	GNPI1_MOUSE		sp|O88958|GNPI1_MOUSE Glucosamine-6-phosphate isomerase 1 OS=Mus musculus OX=10090 GN=Gnpda1 PE=1 SV=3	72.452	true	2	1	0	6.57	32549	17	2	2	2	2	2	2	2	2	1	2		2	2		2		0	0	0	0	2	0	0	0	0	213104	97815.1	244719		580404	178697		485629		166482	9963.15
451921	YTDC2_MOUSE	Ythdc2	YTDC2_MOUSE		sp|B2RR83|YTDC2_MOUSE 3'-5' RNA helicase YTHDC2 OS=Mus musculus OX=10090 GN=Ythdc2 PE=1 SV=1	50.603	true	2	1	0	1.59	161092	90	2	2	2	2	2	2	2		2	2		2	2		2		0	0	0	0	1	0	0	1	0		772312	218058		819338	658006		694093		12446.4	246020
451992	PLRG1_MOUSE	Plrg1	PLRG1_MOUSE		sp|Q922V4|PLRG1_MOUSE Pleiotropic regulator 1 OS=Mus musculus OX=10090 GN=Plrg1 PE=1 SV=1	22.53	true	2	1	0	1.36	56938	30	1	1	1	1	1	1	1	1	1	1	1	1	1		1	1	0	0	0	0	1	0	0	0	0	136422	192415	90327.9	173864	506454	248602		349766	65585.4	136422	119411
451871	SRP68_MOUSE	Srp68	SRP68_MOUSE		sp|Q8BMA6|SRP68_MOUSE Signal recognition particle subunit SRP68 OS=Mus musculus OX=10090 GN=Srp68 PE=1 SV=2	97.887	true	2	1	0	6.24	70574	43	4	4	4	4	4	4	4	3	4	4	1	4	4	1	4	3	0	0	0	0	2	0	0	2	0	223013	576516	728361	115388	1.91207e+06	876390	2138.23	2.41246e+06	143028	153338	394132
450834	TBB5_MOUSE	Tubb5	TBB5_MOUSE	TBB1_MOUSE; TBB2B_MOUSE; TBB3_MOUSE	sp|P99024|TBB5_MOUSE Tubulin beta-5 chain OS=Mus musculus OX=10090 GN=Tubb5 PE=1 SV=1	716.852	true	2	1	3	35.36	49670	22	13	3	16	3	60	15	3	2	3	3	2	3	3	1	2	3	1	1	2	2	4	1	0	3	1	11243519	11816036	13583958	4.56364e+06	31220754	12986334	12623.9	78044664	11201986	3087943	1.65253e+06
451180	DDAH2_MOUSE	Ddah2	DDAH2_MOUSE	DDAH1_MOUSE	sp|Q99LD8|DDAH2_MOUSE N(G),N(G)-dimethylarginine dimethylaminohydrolase 2 OS=Mus musculus OX=10090 GN=Ddah2 PE=1 SV=1	41.687	true	2	1	1	5.61	29645	18	2	2	2	2	2	2	2	2	2	2	1	2	2	1	2	1	1	1	0	0	0	0	0	0	0	200982	444371	301116	52505.4	341581	202254	27729	445113	10682.5	139713	260103
451888	NNTM_MOUSE	Nnt	NNTM_MOUSE		sp|Q61941|NNTM_MOUSE NAD(P) transhydrogenase, mitochondrial OS=Mus musculus OX=10090 GN=Nnt PE=1 SV=2	28.072	true	2	1	0	0.83	113838	55	1	1	1	1	2	2	1		1	1		1			1		0	1	0	0	0	0	0	1	0		120352	144039		28488			154489		12446.4	74688.9
451747	RL26_MOUSE	Rpl26	RL26_MOUSE		sp|P61255|RL26_MOUSE 60S ribosomal protein L26 OS=Mus musculus OX=10090 GN=Rpl26 PE=1 SV=1	114.672	true	2	1	0	17.93	17258	9	4	4	4	4	8	8	4	3	3	3	3	3	3	1	4	4	1	1	0	0	2	0	0	1	3	4.17979e+06	2.79157e+06	3571546	1.06084e+06	7657106	3.71571e+06	267170	9095206	3.58005e+06	2.2449e+06	2.02229e+06
451006	CATZ_MOUSE	Ctsz	CATZ_MOUSE		sp|Q9WUU7|CATZ_MOUSE Cathepsin Z OS=Mus musculus OX=10090 GN=Ctsz PE=1 SV=1	29.385	true	2	1	0	3.27	33996	14	1	1	1	1	2	2	1	1		1	1	1	1	1	1	1	1	0	0	1	0	0	0	0	0	1.02301e+06		1.56e+06	784313	32420.7	1.65401e+06	10438.1	118113	926220	1.02301e+06	12408.4
450503	RAB4A_MOUSE	Rab4a	RAB4A_MOUSE; RAB4B_MOUSE	RAB12_MOUSE; RAB26_MOUSE; RAB30_MOUSE; RAB37_MOUSE; RAB3A_MOUSE; RAB3B_MOUSE; RAB3C_MOUSE; RAB3D_MOUSE; RAB43_MOUSE; RB39B_MOUSE	sp|P56371|RAB4A_MOUSE Ras-related protein Rab-4A OS=Mus musculus OX=10090 GN=Rab4a PE=1 SV=2	60.101	true	2	2	10	9.17	24409	15	2	1	2	1	3	1	1	1	1	1		1	1		1		0	0	0	0	0	0	0	1	0	2.06398e+06	3.54096e+06	2.38037e+06		4817931	1.69061e+06		18975584		48189.9	105980
451731	SC11A_MOUSE	Sec11a	SC11A_MOUSE		sp|Q9R0P6|SC11A_MOUSE Signal peptidase complex catalytic subunit SEC11A OS=Mus musculus OX=10090 GN=Sec11a PE=1 SV=1	23.858	true	2	1	0	4.47	20626	12	1	1	1	1	1	1	1		1	1		1	1		1		0	0	0	0	0	0	0	1	0		603538	418951		967522	191064		2.18885e+06		12446.4	374549
450809	FLNC_MOUSE	Flnc	FLNC_MOUSE		sp|Q8VHX6|FLNC_MOUSE Filamin-C OS=Mus musculus OX=10090 GN=Flnc PE=1 SV=3	257.307	true	2	1	0	2.71	291119	164	8	1	8	1	15	1	1	1	1	1	1	1	1		1	1	0	0	0	0	1	0	0	0	0	1.64866e+06	7353210	5.44809e+06	870197	18074702	4943331	251053	18365484	2.87075e+06	149997	190222
451093	RAN_MOUSE	Ran	RAN_MOUSE	RANT_MOUSE	sp|P62827|RAN_MOUSE GTP-binding nuclear protein Ran OS=Mus musculus OX=10090 GN=Ran PE=1 SV=3	182.455	true	2	1	1	21.76	24423	12	5	5	5	5	19	19	4	3	4	4	2	4	4	2	4	3	0	2	3	0	3	3	1	3	2	4.22579e+06	10085551	8564498	3.0246e+06	20854802	5438851	1.42379e+06	33236310	3053144	4.79212e+06	6938173
451387	TMED9_MOUSE	Tmed9	TMED9_MOUSE		sp|Q99KF1|TMED9_MOUSE Transmembrane emp24 domain-containing protein 9 OS=Mus musculus OX=10090 GN=Tmed9 PE=1 SV=2	9.322	true	2	1	0	7.66	27127	16	2	2	2	2	2	2	2	2	2	2	1	2	1		2	1	0	1	0	0	1	0	0	0	0	1.06789e+06	1.5062e+06	704952	176109	5242374	808355		10953953	31955.5	650575	488204
450911	VAMP1_MOUSE	Vamp1	VAMP1_MOUSE; VAMP2_MOUSE; VAMP3_MOUSE		sp|Q62442|VAMP1_MOUSE Vesicle-associated membrane protein 1 OS=Mus musculus OX=10090 GN=Vamp1 PE=1 SV=1	35.936	true	2	3	0	5.93	12890	4	1	1	1	1	4	4	1	1	1	1	1	1	1		1	1	0	0	1	0	1	1	0	0	1	426382	416188	390411	265759	837006	263501		2.60417e+06	238961	426382	258281
451556	SYFA_MOUSE	Farsa	SYFA_MOUSE		sp|Q8C0C7|SYFA_MOUSE Phenylalanine--tRNA ligase alpha subunit OS=Mus musculus OX=10090 GN=Farsa PE=1 SV=1	39.026	true	2	1	0	3.15	57599	30	2	2	2	2	2	2	2	2	2	2		2	2	1	2	1	0	0	0	0	2	0	0	0	0	263922	398732	493189		1.12323e+06	412145	6090.41	415665	133865	110428	236544
451642	NTF2_MOUSE	Nutf2	NTF2_MOUSE		sp|P61971|NTF2_MOUSE Nuclear transport factor 2 OS=Mus musculus OX=10090 GN=Nutf2 PE=1 SV=1	21.725	true	2	1	0	6.3	14478	8	1	1	1	1	1	1	1		1	1		1	1		1		0	0	0	0	0	0	0	1	0		971527	621338		923755	705346		5087078		12446.4	602919
451779	TBCA_MOUSE	Tbca	TBCA_MOUSE		sp|P48428|TBCA_MOUSE Tubulin-specific chaperone A OS=Mus musculus OX=10090 GN=Tbca PE=1 SV=3	27.697	true	2	1	0	8.33	12758	6	1	1	1	1	1	1	1	1	1	1	1	1	1		1	1	0	0	1	0	0	0	0	0	0	130964	152741	144745	62862.1	324961	137218		331207	77808.7	130964	94789.5
451569	SIX5_MOUSE	Six5	SIX5_MOUSE		sp|P70178|SIX5_MOUSE Homeobox protein SIX5 OS=Mus musculus OX=10090 GN=Six5 PE=1 SV=2	14.577	true	2	1	0	0.97	73716	22	1	1	1	1	1	1	1		1		1	1			1	1	0	0	0	0	1	0	0	0	0		207059		24715.6	166369			79206.9	8459.82	12446.4	128498
452089	TP4A2_MOUSE	Ptp4a2	TP4A2_MOUSE		sp|O70274|TP4A2_MOUSE Protein tyrosine phosphatase type IVA 2 OS=Mus musculus OX=10090 GN=Ptp4a2 PE=1 SV=1	25.003	true	2	1	0	4.79	19127	12	1	1	1	1	1	1	1		1	1		1	1		1		0	0	0	0	1	0	0	0	0		175927	140184		366678	70483.4		205984		12446.4	109179
451630	TP4A1_MOUSE	Ptp4a1	TP4A1_MOUSE		sp|Q63739|TP4A1_MOUSE Protein tyrosine phosphatase type IVA 1 OS=Mus musculus OX=10090 GN=Ptp4a1 PE=1 SV=1	25.003	true	2	1	0	4.62	19815	13	1	1	1	1	1	1	1		1	1		1	1		1		0	0	0	0	1	0	0	0	0		175927	140184		366678	70483.4		205984		12446.4	109179
451350	SUCB2_MOUSE	Suclg2	SUCB2_MOUSE		sp|Q9Z2I8|SUCB2_MOUSE Succinate--CoA ligase [GDP-forming] subunit beta, mitochondrial OS=Mus musculus OX=10090 GN=Suclg2 PE=1 SV=3	22.25	true	2	1	0	2.08	46840	31	1	1	1	1	1	1	1	1		1		1	1		1	1	0	0	0	0	1	0	0	0	0	191857		130304		229905	28821.7		137054	31987.3	191857	12408.4
451802	RS24_MOUSE	Rps24	RS24_MOUSE		sp|P62849|RS24_MOUSE 40S ribosomal protein S24 OS=Mus musculus OX=10090 GN=Rps24 PE=1 SV=1	268.001	true	2	1	0	27.07	15423	7	5	5	7	7	19	19	7	5	2	2	4	4	3	1	2	2	6	0	0	4	2	2	2	0	3	6.12654e+06	171455	475282	14885243	4410725	10010052	596141	854449	14687554	34530644	178382
450724	ITCH_MOUSE	Itch	ITCH_MOUSE		sp|Q8C863|ITCH_MOUSE E3 ubiquitin-protein ligase Itchy OS=Mus musculus OX=10090 GN=Itch PE=1 SV=2	46.8	true	2	1	0	1.85	98994	54	2	1	2	1	3	1	1	1	1	1	1	1	1		1		0	0	0	0	1	0	0	0	0	371223	404194	233318	141466	1.29324e+06	269011		1.15072e+06		102566	117233
451715	IFI3_MOUSE	Ifi203	IFI3_MOUSE		sp|O35368|IFI3_MOUSE Interferon-activable protein 203 OS=Mus musculus OX=10090 GN=Ifi203 PE=1 SV=1	23.553	true	2	1	0	3.43	46299	28	1	1	1	1	1	1	1	1		1		1	1		1		0	0	1	0	0	0	0	0	0	143319		66457.4		155389	51067.9		125829		143319	12408.4
451031	CMC1_MOUSE	Slc25a12	CMC1_MOUSE	CMC2_MOUSE	sp|Q8BH59|CMC1_MOUSE Calcium-binding mitochondrial carrier protein Aralar1 OS=Mus musculus OX=10090 GN=Slc25a12 PE=1 SV=1	142.306	true	2	1	1	6.94	74570	40	5	5	5	5	7	7	5	3	4	4	1	4	3	1	5	3	0	0	1	0	2	0	0	4	0	219532	745036	832212	18417.2	2.03158e+06	493403	8249.04	2.95401e+06	336311	244622	606607
451089	ERO1A_MOUSE	Ero1a	ERO1A_MOUSE	ERO1B_MOUSE	sp|Q8R180|ERO1A_MOUSE ERO1-like protein alpha OS=Mus musculus OX=10090 GN=Ero1a PE=1 SV=2	82.025	true	2	1	1	6.47	54084	35	3	3	3	3	4	4	3	1	3	3		3	2		3	2	0	0	0	0	1	0	0	3	0	114269	925177	471926		1671987	277532		3.46155e+06	36560.5	19487.3	818397
451868	DEK_MOUSE	Dek	DEK_MOUSE		sp|Q7TNV0|DEK_MOUSE Protein DEK OS=Mus musculus OX=10090 GN=Dek PE=1 SV=1	151.791	true	2	1	0	13.68	43159	23	5	5	5	5	8	8	5	3	5	3	3	4	5	1	5	3	0	1	0	1	3	1	0	2	0	1.67022e+06	2907635	683424	1.18842e+06	4899321	2.1899e+06	66986.3	2.5138e+06	1005862	447079	4.66057e+06
451367	RU2B_MOUSE	Snrpb2	RU2B_MOUSE		sp|Q9CQI7|RU2B_MOUSE U2 small nuclear ribonucleoprotein B'' OS=Mus musculus OX=10090 GN=Snrpb2 PE=1 SV=1	92.833	true	2	1	0	11.11	25323	11	3	1	3	1	6	3	1	1	1	1	1	1	1	1	1	1	0	0	1	0	1	0	0	1	0	398828	1.02989e+06	1.09084e+06	726771	3.01586e+06	1841269	502749	2914280	345740	398828	202551
451294	LNP_MOUSE	Lnpk	LNP_MOUSE		sp|Q7TQ95|LNP_MOUSE Endoplasmic reticulum junction formation protein lunapark OS=Mus musculus OX=10090 GN=Lnpk PE=1 SV=1	22.587	true	2	1	0	1.88	47500	23	1	1	1	1	1	1	1	1	1	1		1	1		1		0	0	0	0	1	0	0	0	0	86444.6	80374.8	88784.6		139905	65212.6		399385		86444.6	49879.7
451024	NOL9_MOUSE	Nol9	NOL9_MOUSE		sp|Q3TZX8|NOL9_MOUSE Polynucleotide 5'-hydroxyl-kinase NOL9 OS=Mus musculus OX=10090 GN=Nol9 PE=1 SV=1	51.547	true	2	1	0	1.12	80840	27	1	1	1	1	2	2	1	1		1	1		1			1	0	0	1	0	0	0	0	0	1	455811		476475	197945		111900			210931	455811	12408.4
452163	EDC3_MOUSE	Edc3	EDC3_MOUSE		sp|Q8K2D3|EDC3_MOUSE Enhancer of mRNA-decapping protein 3 OS=Mus musculus OX=10090 GN=Edc3 PE=1 SV=1	26.286	true	2	1	0	1.57	55956	31	1	1	1	1	1	1	1	1	1	1	1	1	1	1	1	1	0	0	0	1	0	0	0	0	0	260290	72106.3	94454.7	590528	77619.8	37853.4	26384	126857	17265.9	260290	44748.4
451567	VAV_MOUSE	Vav1	VAV_MOUSE		sp|P27870|VAV_MOUSE Proto-oncogene vav OS=Mus musculus OX=10090 GN=Vav1 PE=1 SV=1	137.345	true	2	1	0	5.8	98137	59	5	5	5	5	6	6	5	2	4	3	4	3	3		3	3	0	1	1	0	3	0	0	0	1	259980	1145370	695094	291002	1.53082e+06	504746		1.19401e+06	553869	133344	617134
451946	ARC1A_MOUSE	Arpc1a	ARC1A_MOUSE		sp|Q9R0Q6|ARC1A_MOUSE Actin-related protein 2/3 complex subunit 1A OS=Mus musculus OX=10090 GN=Arpc1a PE=1 SV=1	108.037	true	2	1	0	8.38	41626	23	3	3	3	3	3	3	3	2	2	2		2	2		3	1	0	0	0	0	0	0	0	3	0	562254	173385	69266.1		136707	48702.5		9558151	4769.47	374777	227806
450762	BLMH_MOUSE	Blmh	BLMH_MOUSE		sp|Q8R016|BLMH_MOUSE Bleomycin hydrolase OS=Mus musculus OX=10090 GN=Blmh PE=1 SV=1	60.598	true	2	1	0	4.62	52511	29	2	2	2	2	3	3	2	1	1	1		1	1		1	1	1	0	0	0	1	0	0	1	0	2.11129e+06	45644.5	329564		574406	242906		2.06051e+06	21851.7	354515	68526.8
451475	CNN2_MOUSE	Cnn2	CNN2_MOUSE; CNN3_MOUSE		sp|Q08093|CNN2_MOUSE Calponin-2 OS=Mus musculus OX=10090 GN=Cnn2 PE=1 SV=1	40.445	true	2	2	0	3.61	33156	16	1	1	1	1	2	2	1		1	1	1	1	1		1		0	0	1	0	0	0	0	1	0		314883	466414	74965.5	822551	232429		1.16791e+06		12446.4	195413
451938	NOP58_MOUSE	Nop58	NOP58_MOUSE		sp|Q6DFW4|NOP58_MOUSE Nucleolar protein 58 OS=Mus musculus OX=10090 GN=Nop58 PE=1 SV=1	237.721	true	2	1	0	17.91	60343	27	7	7	7	7	12	12	7	6	1	4	4	4	4	2	4	1	4	0	0	1	1	2	0	3	1	3.87426e+06	102986	585173	1.22083e+06	719561	1.9459e+06	22993	3874327	294775	4.57949e+06	12806
450953	FACR1_MOUSE	Far1	FACR1_MOUSE		sp|Q922J9|FACR1_MOUSE Fatty acyl-CoA reductase 1 OS=Mus musculus OX=10090 GN=Far1 PE=1 SV=1	36.735	true	2	1	0	1.55	59435	32	1	1	1	1	1	1	1	1	1	1		1	1		1	1	0	0	0	0	1	0	0	0	0	76632.5	197265	146315		504643	104801		208365	88758.1	76632.5	122420
450840	AP1B1_MOUSE	Ap1b1	AP1B1_MOUSE		sp|O35643|AP1B1_MOUSE AP-1 complex subunit beta-1 OS=Mus musculus OX=10090 GN=Ap1b1 PE=1 SV=2	128.626	true	2	1	0	5.94	103935	49	5	3	5	3	7	5	3	2	2	2	1	2	2		3	1	1	0	1	0	0	0	0	3	0	891834	834198	1.32983e+06	343742	2.87073e+06	646454		11510761	217198	511769	194185
451570	ANXA4_MOUSE	Anxa4	ANXA4_MOUSE		sp|P97429|ANXA4_MOUSE Annexin A4 OS=Mus musculus OX=10090 GN=Anxa4 PE=1 SV=4	9.017	true	2	1	0	2.19	35916	22	1	1	1	1	1	1	1	1	1		1	1					0	1	0	0	0	0	0	0	0	30633.7	314812		81501.6	271041					30633.7	195368
452026	CK068_MOUSE	Bles03	CK068_MOUSE		sp|Q8VD62|CK068_MOUSE UPF0696 protein C11orf68 homolog OS=Mus musculus OX=10090 GN=Bles03 PE=1 SV=2	20.498	true	2	1	0	3.69	31845	19	1	1	1	1	1	1	1	1	1	1		1	1		1		0	0	0	0	1	0	0	0	0	62960.9	92505.8	112918		265435	82512.2		406434		62960.9	57408
451038	PCBP1_MOUSE	Pcbp1	PCBP1_MOUSE	PCBP2_MOUSE; PCBP3_MOUSE	sp|P60335|PCBP1_MOUSE Poly(rC)-binding protein 1 OS=Mus musculus OX=10090 GN=Pcbp1 PE=1 SV=1	291.012	true	2	1	2	26.69	37497	21	7	7	8	8	19	19	8	5	7	8	3	7	7	2	8	4	1	2	2	0	4	1	2	7	0	2.7571e+06	3.65551e+06	4.68396e+06	3195063	11560842	3.61793e+06	234954	26657324	1.32658e+06	981517	3.87099e+06
451053	MCMBP_MOUSE	Mcmbp	MCMBP_MOUSE		sp|Q8R3C0|MCMBP_MOUSE Mini-chromosome maintenance complex-binding protein OS=Mus musculus OX=10090 GN=Mcmbp PE=1 SV=1	23.122	true	2	1	0	1.71	72891	37	1	1	1	1	1	1	1		1	1	1	1			1		0	0	0	0	1	0	0	0	0		197079	136820	54708.6	308962			205539		12446.4	122305
451111	CPSF5_MOUSE	Nudt21	CPSF5_MOUSE		sp|Q9CQF3|CPSF5_MOUSE Cleavage and polyadenylation specificity factor subunit 5 OS=Mus musculus OX=10090 GN=Nudt21 PE=1 SV=1	79.007	true	2	1	0	13.22	26240	18	2	2	2	2	4	4	2	1	1	1		2	1		1		0	0	0	0	2	1	0	1	0	436677	270081	344304		1.23199e+06	257005		2.01285e+06		150312	62665.2
450611	STK3_MOUSE	Stk3	STK3_MOUSE; STK4_MOUSE		sp|Q9JI10|STK3_MOUSE Serine/threonine-protein kinase 3 OS=Mus musculus OX=10090 GN=Stk3 PE=1 SV=1	33.809	true	2	2	0	2.62	56854	31	1	1	1	1	1	1	1	1		1	1	1	1		1		0	0	0	0	1	0	0	0	0	110908		563002	29378	1.66619e+06	280622		760373		110908	12408.4
451595	NRF1_MOUSE	Nrf1	NRF1_MOUSE		sp|Q9WU00|NRF1_MOUSE Nuclear respiratory factor 1 OS=Mus musculus OX=10090 GN=Nrf1 PE=1 SV=2	28.597	true	2	1	0	1.79	53571	10	1	1	1	1	1	1	1	1	1	1		1	1	1	1	1	0	0	0	0	0	1	0	0	0	182720	133147	109632		559180	190237	3620.93	371397	61001.7	182720	82629.7
450574	RL35A_MOUSE	Rpl35a	RL35A_MOUSE		sp|O55142|RL35A_MOUSE 60S ribosomal protein L35a OS=Mus musculus OX=10090 GN=Rpl35a PE=1 SV=2	194.468	true	2	1	0	45.45	12554	9	7	7	8	8	37	37	8	6	5	7	6	8	8	3	8	8	2	4	3	11	1	4	2	2	8	24079782	17264394	68856048	11224776	114874488	89254784	13664258	105503592	18161796	6.56384e+06	13983363
450711	PLD4_MOUSE	Pld4	PLD4_MOUSE		sp|Q8BG07|PLD4_MOUSE 5'-3' exonuclease PLD4 OS=Mus musculus OX=10090 GN=Pld4 PE=1 SV=1	72.955	true	2	1	0	4.57	56154	28	2	2	2	2	5	5	2	1	2	2		2	2		1		1	1	1	0	1	0	0	1	0	389660	812670	1.47837e+06		2870266	862944		1.05678e+06		16595.9	58551.1
450893	EDF1_MOUSE	Edf1	EDF1_MOUSE		sp|Q9JMG1|EDF1_MOUSE Endothelial differentiation-related factor 1 OS=Mus musculus OX=10090 GN=Edf1 PE=1 SV=1	32.253	true	2	1	0	10.14	16369	10	1	1	1	1	2	2	1	1		1		1	1		1		0	0	1	0	0	0	0	1	0	412952		414850		1.07409e+06	501091		2.04838e+06		412952	12408.4
452139	SYFB_MOUSE	Farsb	SYFB_MOUSE		sp|Q9WUA2|SYFB_MOUSE Phenylalanine--tRNA ligase beta subunit OS=Mus musculus OX=10090 GN=Farsb PE=1 SV=2	89.262	true	2	1	0	4.75	65697	41	3	3	3	3	7	7	3	1	2	3	1	3	3		3	1	0	2	1	0	2	0	0	2	0	189003	481648	364870	180718	1.23252e+06	370382		3.08174e+06	58659.3	24668.3	277180
451368	SNRPA_MOUSE	Snrpa	SNRPA_MOUSE		sp|Q62189|SNRPA_MOUSE U1 small nuclear ribonucleoprotein A OS=Mus musculus OX=10090 GN=Snrpa PE=1 SV=3	70.694	true	2	1	0	8.71	31835	13	3	1	3	1	4	1	1	1	1	1	1	1	1		1	1	0	0	0	0	0	0	0	1	0	164161	1.26622e+06	1380377	99767.9	3.83308e+06	1.43937e+06	496650	3224600	453274	164161	349217
451252	DOCK2_MOUSE	Dock2	DOCK2_MOUSE		sp|Q8C3J5|DOCK2_MOUSE Dedicator of cytokinesis protein 2 OS=Mus musculus OX=10090 GN=Dock2 PE=1 SV=3	24.978	true	2	1	0	0.49	211704	106	1	1	1	1	1	1	1		1	1		1			1		0	0	0	0	0	0	0	1	0		208418	243421		564934			372398		12446.4	129342
450992	SNX1_MOUSE	Snx1	SNX1_MOUSE		sp|Q9WV80|SNX1_MOUSE Sorting nexin-1 OS=Mus musculus OX=10090 GN=Snx1 PE=1 SV=1	41.544	true	2	1	0	2.68	58952	29	1	1	1	1	1	1	1		1	1		1	1		1		0	1	0	0	0	0	0	0	0		281413	233345		557513	154887		479140		12446.4	174641
452124	PRC2C_MOUSE	Prrc2c	PRC2C_MOUSE		sp|Q3TLH4|PRC2C_MOUSE Protein PRRC2C OS=Mus musculus OX=10090 GN=Prrc2c PE=1 SV=3	27.209	true	2	1	0	0.35	310892	130	1	1	1	1	1	1	1	1	1	1	1	1	1		1	1	0	0	0	0	1	0	0	0	0	153367	64863.3	100171	391344	253003	59879		160503	47722.1	153367	40253.4
450691	NU107_MOUSE	Nup107	NU107_MOUSE		sp|Q8BH74|NU107_MOUSE Nuclear pore complex protein Nup107 OS=Mus musculus OX=10090 GN=Nup107 PE=1 SV=1	35.122	true	2	1	0	1.19	106716	59	1	1	1	1	1	1	1	1	1	1		1					0	0	0	0	1	0	0	0	0	59842.7	79882.9	63141.9		250670					59842.7	49574.4
452141	FKBP4_MOUSE	Fkbp4	FKBP4_MOUSE		sp|P30416|FKBP4_MOUSE Peptidyl-prolyl cis-trans isomerase FKBP4 OS=Mus musculus OX=10090 GN=Fkbp4 PE=1 SV=5	112.553	true	2	1	0	7.86	51572	33	5	5	5	5	5	5	5	4	5	4	2	5	5	1	5	3	0	0	1	0	1	0	0	3	0	186817	1.549e+06	1.44885e+06	330330	4.21438e+06	1156799	14201.6	6698473	871973	792018	1.18107e+06
452062	TCPG_MOUSE	Cct3	TCPG_MOUSE		sp|P80318|TCPG_MOUSE T-complex protein 1 subunit gamma OS=Mus musculus OX=10090 GN=Cct3 PE=1 SV=1	242.49	true	2	1	0	13.76	60630	38	7	7	7	7	10	10	7	3	6	5	1	5	5		6	3	0	2	0	0	0	1	0	5	2	521970	2.60881e+06	1.84203e+06	269654	3112366	1.53724e+06		8810556	1.86287e+06	219549	2.03772e+06
450984	HXK2_MOUSE	Hk2	HXK2_MOUSE		sp|O08528|HXK2_MOUSE Hexokinase-2 OS=Mus musculus OX=10090 GN=Hk2 PE=1 SV=1	132.291	true	2	1	0	3.82	102535	55	3	1	4	1	4	1	1		1								0	1	0	0	0	0	0	0	0	549641	850459	342908		243756	67919.3		2.51687e+06	21621.2	12446.4	527785
451144	PSA2_MOUSE	Psma2	PSA2_MOUSE		sp|P49722|PSA2_MOUSE Proteasome subunit alpha type-2 OS=Mus musculus OX=10090 GN=Psma2 PE=1 SV=3	155.37	true	2	1	0	22.65	25927	16	4	4	4	4	8	8	4	3	2	4	2	4	3		4	1	1	1	1	1	0	1	0	2	0	2.51847e+06	1.25803e+06	1.64567e+06	1.70888e+06	2.33987e+06	671595		7228933	336192	875698	183812
451919	SQOR_MOUSE	Sqor	SQOR_MOUSE		sp|Q9R112|SQOR_MOUSE Sulfide:quinone oxidoreductase, mitochondrial OS=Mus musculus OX=10090 GN=Sqor PE=1 SV=3	46.841	true	2	1	0	3.11	50282	33	1	1	1	1	1	1	1	1	1	1		1	1		1		0	0	0	0	1	0	0	0	0	223717	100256	286654		646413	117353		3545653		223717	62217.6
450846	HAP28_MOUSE	Pdap1	HAP28_MOUSE		sp|Q3UHX2|HAP28_MOUSE 28 kDa heat- and acid-stable phosphoprotein OS=Mus musculus OX=10090 GN=Pdap1 PE=1 SV=1	27.063	true	2	1	0	5.52	20605	9	1	1	1	1	2	2	1	1	1	1	1		1		1	1	0	0	0	0	0	1	0	0	0	86854.9	204113	161395	56673.1		246610		394505	52140.2	86854.9	126670
451366	BUB3_MOUSE	Bub3	BUB3_MOUSE		sp|Q9WVA3|BUB3_MOUSE Mitotic checkpoint protein BUB3 OS=Mus musculus OX=10090 GN=Bub3 PE=1 SV=2	63.556	true	2	1	0	5.21	36955	16	2	2	2	2	6	6	2	1	2	2	1	2	2		2	1	1	1	1	0	2	0	0	1	0	304415	582189	638847	216556	1280420	456226		2.18745e+06	54850.8	37843.7	395426
451342	RLA0_MOUSE	Rplp0	RLA0_MOUSE		sp|P14869|RLA0_MOUSE 60S acidic ribosomal protein P0 OS=Mus musculus OX=10090 GN=Rplp0 PE=1 SV=3	268.548	true	2	1	0	19.24	34216	18	5	5	5	5	24	24	5	3	5	5	3	5	5	1	5	4	3	0	2	3	4	4	1	4	3	17938084	4.39874e+06	7.93014e+06	7.30045e+06	47113964	45471596	1.72406e+06	73746392	10343384	7880431	4719867
451862	SMCA5_MOUSE	Smarca5	SMCA5_MOUSE	SMCA1_MOUSE	sp|Q91ZW3|SMCA5_MOUSE SWI/SNF-related matrix-associated actin-dependent regulator of chromatin subfamily A member 5 OS=Mus musculus OX=10090 GN=Smarca5 PE=1 SV=1	114.619	true	2	1	1	3.33	121627	64	4	4	4	4	6	6	4	2	4	3	2	4	4		4	2	1	0	0	0	2	0	0	3	0	1.02963e+06	1.65785e+06	999416	370094	3.51126e+06	1.3115e+06		3763655	500157	158443	1.1708e+06
451393	ACADL_MOUSE	Acadl	ACADL_MOUSE		sp|P51174|ACADL_MOUSE Long-chain specific acyl-CoA dehydrogenase, mitochondrial OS=Mus musculus OX=10090 GN=Acadl PE=1 SV=2	43.419	true	2	1	0	2.79	47908	24	1	1	1	1	2	2	1		1	1	1	1	1		1		0	1	0	0	0	0	0	1	0		305199	311217	35444.3	1.01938e+06	341063		636218		12446.4	189403
452053	TCPQ_MOUSE	Cct8	TCPQ_MOUSE		sp|P42932|TCPQ_MOUSE T-complex protein 1 subunit theta OS=Mus musculus OX=10090 GN=Cct8 PE=1 SV=3	352.366	true	2	1	0	18.8	59555	40	10	10	11	11	23	23	10	6	10	8	4	9	9	3	9	4	3	3	1	0	5	2	0	5	2	1.68728e+06	4.41853e+06	2507679	368667	8.10442e+06	4.20168e+06	295154	20586636	1.40067e+06	610085	2700728
450581	PDIA4_MOUSE	Pdia4	PDIA4_MOUSE		sp|P08003|PDIA4_MOUSE Protein disulfide-isomerase A4 OS=Mus musculus OX=10090 GN=Pdia4 PE=1 SV=3	291.769	true	2	1	0	13.64	71982	42	10	10	10	10	18	18	10	6	9	9	3	9	8	2	10	6	0	4	1	0	5	2	0	4	2	2.11722e+06	4.015e+06	3.30306e+06	140945	7.62053e+06	2.27616e+06	114778	9671806	1.7827e+06	615101	3440000
450534	K2C79_MOUSE	Krt79	K2C79_MOUSE		sp|Q8VED5|K2C79_MOUSE Keratin, type II cytoskeletal 79 OS=Mus musculus OX=10090 GN=Krt79 PE=1 SV=2	483.134	true	2	1	0	14.5	57552	32	13	2	13	2	112	18	2	1	2	2	1	2	2		2	2	3	3	1	2	1	3	0	4	1	540051392	907336000	34933008	195216032	321687136	170656640	131855952	259293360	19184502	2.49012e+06	54054152
452136	SEPT2_MOUSE	Septin2	SEPT2_MOUSE		sp|P42208|SEPT2_MOUSE Septin-2 OS=Mus musculus OX=10090 GN=Septin2 PE=1 SV=2	27.389	true	2	1	0	1.94	41526	22	1	1	1	1	2	2	1	1	1	1	1	1	1		1	1	0	1	0	0	0	1	0	0	0	221189	427881	407268	200652	1.52005e+06	311434		1.2642e+06	210552	221189	265538
450695	NDUA9_MOUSE	Ndufa9	NDUA9_MOUSE		sp|Q9DC69|NDUA9_MOUSE NADH dehydrogenase [ubiquinone] 1 alpha subcomplex subunit 9, mitochondrial OS=Mus musculus OX=10090 GN=Ndufa9 PE=1 SV=2	30.106	true	2	1	0	2.65	42525	29	1	1	1	1	1	1	1	1	1	1	1	1	1		1	1	0	0	0	0	1	0	0	0	0	137071	176817	207043	134246	591432	185920		335404	103179	137071	109730
451362	LRC47_MOUSE	Lrrc47	LRC47_MOUSE		sp|Q505F5|LRC47_MOUSE Leucine-rich repeat-containing protein 47 OS=Mus musculus OX=10090 GN=Lrrc47 PE=1 SV=1	29.825	true	2	1	0	1.55	63590	38	1	1	1	1	1	1	1	1	1	1	1	1	1		1	1	0	0	0	0	1	0	0	0	0	152949	247503	233830	101143	582672	260638		1.55219e+06	38946.1	152949	153598
451317	ESTD_MOUSE	Esd	ESTD_MOUSE		sp|Q9R0P3|ESTD_MOUSE S-formylglutathione hydrolase OS=Mus musculus OX=10090 GN=Esd PE=1 SV=1	36.875	true	2	1	0	7.8	31320	16	1	1	1	1	3	3	1	1		1		1	1		1		0	0	1	0	0	1	0	1	0	140152		256470		589774	166184		367044		140152	12408.4
452006	CSDE1_MOUSE	Csde1	CSDE1_MOUSE		sp|Q91W50|CSDE1_MOUSE Cold shock domain-containing protein E1 OS=Mus musculus OX=10090 GN=Csde1 PE=1 SV=1	97.047	true	2	1	0	4.39	88791	53	4	4	4	4	6	6	4	3	3	4	2	4	4		4	4	1	0	1	0	2	1	0	1	0	469832	527321	652952	266385	1.95508e+06	757161		3.86239e+06	287722	464721	329668
450978	NUP93_MOUSE	Nup93	NUP93_MOUSE		sp|Q8BJ71|NUP93_MOUSE Nuclear pore complex protein Nup93 OS=Mus musculus OX=10090 GN=Nup93 PE=1 SV=1	108.032	true	2	1	0	3.79	93281	56	3	3	3	3	4	4	3	1	2	3		3	1		2		0	0	0	0	2	0	0	2	0	114592	296163	625425		2484544	179134		2216567		13437.4	307807
452002	SYEP_MOUSE	Eprs1	SYEP_MOUSE		sp|Q8CGC7|SYEP_MOUSE Bifunctional glutamate/proline--tRNA ligase OS=Mus musculus OX=10090 GN=Eprs1 PE=1 SV=4	156.015	true	2	1	0	3.51	170079	101	6	6	6	6	7	7	6	3	5	5	2	5	6		6	4	0	0	1	0	0	2	0	4	0	1.27861e+06	1.46399e+06	1.64871e+06	580900	2.66796e+06	2.73388e+06		7.05792e+06	1.08261e+06	587913	1.05761e+06
451649	ADH7_MOUSE	Adh7	ADH7_MOUSE; ADHX_MOUSE		sp|Q64437|ADH7_MOUSE All-trans-retinol dehydrogenase [NAD(+)] ADH7 OS=Mus musculus OX=10090 GN=Adh7 PE=2 SV=2	38.612	true	2	2	0	2.14	39904	23	1	1	1	1	2	2	1	1	1	1	1		1		1		0	1	0	0	0	0	0	1	0	200870	788926	36417.7	43542.6		113263		2.86959e+06		200870	489598
451498	RHG17_MOUSE	Arhgap17	RHG17_MOUSE		sp|Q3UIA2|RHG17_MOUSE Rho GTPase-activating protein 17 OS=Mus musculus OX=10090 GN=Arhgap17 PE=1 SV=1	47.778	true	2	1	0	1.42	92202	43	1	1	1	1	2	2	1	1	1	1	1	1	1		1	1	0	0	0	0	1	0	0	1	0	154912	340402	310602	49623.4	615815	177648		816347	128325	154912	211250
450593	IF4A3_MOUSE	Eif4a3	IF4A3_MOUSE		sp|Q91VC3|IF4A3_MOUSE Eukaryotic initiation factor 4A-III OS=Mus musculus OX=10090 GN=Eif4a3 PE=1 SV=3	360.614	true	2	1	0	21.65	46840	26	9	6	9	6	30	18	6	3	4	4	4	6	6		6	3	4	1	0	2	3	1	0	6	1	4299192	3.33022e+06	4664481	1.96551e+06	23932702	11045429		39014780	2.28519e+06	688578	782574
451041	YTHD1_MOUSE	Ythdf1	YTHD1_MOUSE; YTHD2_MOUSE; YTHD3_MOUSE		sp|P59326|YTHD1_MOUSE YTH domain-containing family protein 1 OS=Mus musculus OX=10090 GN=Ythdf1 PE=1 SV=1	22.816	true	2	3	0	1.61	60879	22	1	1	1	1	1	1	1	1			1						0	0	0	1	0	0	0	0	0	622868			1.16201e+06						622868	12408.4
451887	CALX_MOUSE	Canx	CALX_MOUSE		sp|P35564|CALX_MOUSE Calnexin OS=Mus musculus OX=10090 GN=Canx PE=1 SV=1	237.64	true	2	1	0	14.04	67278	36	7	7	7	7	11	11	7		4	4	1	7	4		4	2	0	1	2	0	3	0	0	3	2		1.55573e+06	2755049	355538	7.27748e+06	1725907		4995067	542842	12446.4	1.04857e+06
451457	EIF3L_MOUSE	Eif3l	EIF3L_MOUSE		sp|Q8QZY1|EIF3L_MOUSE Eukaryotic translation initiation factor 3 subunit L OS=Mus musculus OX=10090 GN=Eif3l PE=1 SV=1	347.197	true	2	1	0	14.72	66613	32	10	10	10	10	18	18	10	9	6	9	5	7	8	2	9	5	1	3	2	1	3	1	0	7	0	2.22397e+06	2.59209e+06	2.04017e+06	4615989	5.23651e+06	2.78011e+06	110961	20098292	541784	2.804e+06	1.40738e+06
451042	SAR1A_MOUSE	Sar1a	SAR1A_MOUSE; SAR1B_MOUSE		sp|P36536|SAR1A_MOUSE GTP-binding protein SAR1a OS=Mus musculus OX=10090 GN=Sar1a PE=1 SV=1	25.409	true	2	2	0	4.04	22371	11	1	1	1	1	2	2	1	1	1	1	1	1	1		1	1	0	0	0	0	1	0	0	1	0	106895	548749	215664	165540	651687	232800		1.09843e+06	68072.6	106895	340548
450939	RL30_MOUSE	Rpl30	RL30_MOUSE		sp|P62889|RL30_MOUSE 60S ribosomal protein L30 OS=Mus musculus OX=10090 GN=Rpl30 PE=1 SV=2	203.732	true	2	1	0	27.83	12784	8	4	4	5	5	18	18	5	4	3	5	2	5	5	1	5	2	2	1	2	2	2	2	1	3	3	21249056	104077800	4.6085e+06	21952776	8.37105e+06	19264156	1.26811e+06	24791968	12262660	37206516	12668579
450504	RAB10_MOUSE	Rab10	RAB10_MOUSE	RAB12_MOUSE; RAB13_MOUSE; RAB26_MOUSE; RAB30_MOUSE; RAB37_MOUSE; RAB3A_MOUSE; RAB3B_MOUSE; RAB3C_MOUSE; RAB3D_MOUSE; RAB43_MOUSE; RB39B_MOUSE	sp|P61027|RAB10_MOUSE Ras-related protein Rab-10 OS=Mus musculus OX=10090 GN=Rab10 PE=1 SV=1	205.05	true	2	1	11	37.5	22540	17	6	4	6	4	10	5	4	3	3	2	1	2	2		4	1	0	0	1	0	0	0	0	4	0	4559197	9800734	6.3273e+06	734979	16485568	4782203		52056104	90048	334484	1.07257e+06
451910	PSA7_MOUSE	Psma7	PSA7_MOUSE	PSMA8_MOUSE	sp|Q9Z2U0|PSA7_MOUSE Proteasome subunit alpha type-7 OS=Mus musculus OX=10090 GN=Psma7 PE=1 SV=1	111.096	true	2	1	1	14.52	27855	16	4	4	4	4	10	10	4	2	4	4	2	4	4	2	4	1	0	2	0	1	3	1	0	3	0	1.83657e+06	6147348	3.83495e+06	783305	9613112	4421374	52991	26481880	230376	51380.2	3.14159e+06
451047	AT5F1_MOUSE	Atp5pb	AT5F1_MOUSE		sp|Q9CQQ7|AT5F1_MOUSE ATP synthase F(0) complex subunit B1, mitochondrial OS=Mus musculus OX=10090 GN=Atp5pb PE=1 SV=1	135.552	true	2	1	0	14.45	28949	18	4	4	4	4	8	8	4	1	4	3	1	3	2		3	2	0	3	1	0	1	1	0	2	0	82559.1	2673315	1.80744e+06	30375	4622656	1.42097e+06		3.59915e+06	623724	65765.9	2.6507e+06
450521	MAOX_MOUSE	Me1	MAOX_MOUSE		sp|P06801|MAOX_MOUSE NADP-dependent malic enzyme OS=Mus musculus OX=10090 GN=Me1 PE=1 SV=2	69.924	true	2	1	0	4.37	63954	33	3	3	3	3	4	4	3	2	3	2	3	3	2	2	2	2	1	1	0	1	0	0	0	1	0	3269751	2.09905e+06	715358	16420448	1.01942e+06	726687	76195	19549056	178552	7.04094e+06	2.834e+06
451803	ODO1_MOUSE	Ogdh	ODO1_MOUSE		sp|Q60597|ODO1_MOUSE 2-oxoglutarate dehydrogenase, mitochondrial OS=Mus musculus OX=10090 GN=Ogdh PE=1 SV=3	137.216	true	2	1	0	4.69	116449	51	4	4	4	4	6	6	4	2	3	4	2	4	4		4	1	0	0	1	0	3	0	0	2	0	411858	505899	728584	174387	2.30599e+06	338979		4.19074e+06	380065	73718.3	188759
451557	LAMP2_MOUSE	Lamp2	LAMP2_MOUSE		sp|P17047|LAMP2_MOUSE Lysosome-associated membrane glycoprotein 2 OS=Mus musculus OX=10090 GN=Lamp2 PE=1 SV=2	28.865	true	2	1	0	1.93	45681	22	1	1	1	1	1	1	1		1	1		1	1		1		0	0	0	0	1	0	0	0	0		366916	396687		990046	286669		788744		12446.4	227704
452138	PSA1_MOUSE	Psma1	PSA1_MOUSE		sp|Q9R1P4|PSA1_MOUSE Proteasome subunit alpha type-1 OS=Mus musculus OX=10090 GN=Psma1 PE=1 SV=1	116.282	true	2	1	0	12.17	29547	18	3	3	4	4	8	8	4	3	3	3	1	4	3		4	2	1	1	0	0	2	0	0	3	1	376314	5240237	2963912	41999.7	7.30466e+06	3.58739e+06		14979912	1.46464e+06	263429	3.17077e+06
451062	ATPA_MOUSE	Atp5f1a	ATPA_MOUSE		sp|Q03265|ATPA_MOUSE ATP synthase subunit alpha, mitochondrial OS=Mus musculus OX=10090 GN=Atp5f1a PE=1 SV=1	642.727	true	2	1	0	29.84	59753	36	15	15	16	16	48	48	15	9	11	13	9	13	13	4	14	10	4	7	5	1	5	5	1	11	7	11333673	23678902	23653268	3.34264e+06	56661964	15158511	757697	123857056	6366542	3.02511e+06	14012735
451261	ACLY_MOUSE	Acly	ACLY_MOUSE		sp|Q91V92|ACLY_MOUSE ATP-citrate synthase OS=Mus musculus OX=10090 GN=Acly PE=1 SV=1	123.634	true	2	1	0	3.02	119728	64	4	4	4	4	6	6	4	3	3	4	2	3	3		4	2	0	0	2	0	2	0	0	2	0	302404	1.16708e+06	1.06649e+06	323371	2.6781e+06	747852		12434886	42055.5	142221	664538
450935	CLH1_MOUSE	Cltc	CLH1_MOUSE		sp|Q68FD5|CLH1_MOUSE Clathrin heavy chain 1 OS=Mus musculus OX=10090 GN=Cltc PE=1 SV=3	740.334	true	2	1	0	13.31	191557	98	20	20	21	21	33	33	21	10	15	18	7	16	14	2	20	9	2	4	4	1	5	1	0	15	1	4.13062e+06	6486814	8068640	3.28408e+06	14135578	4185663	322854	70410472	1.65574e+06	1.31117e+06	4851741
451692	HBA_MOUSE	Hba	HBA_MOUSE	HBAZ_MOUSE	sp|P01942|HBA_MOUSE Hemoglobin subunit alpha OS=Mus musculus OX=10090 GN=Hba PE=1 SV=2	61.675	true	2	1	1	15.49	15085	8	2	2	2	2	5	5	2	2	2	2	2	2	2		2	1	2	0	0	1	0	1	0	0	1	2.65808e+06	804047	88600.5	1.77831e+06	587844	628866		1.02062e+06	378268	2.40357e+06	266312
451206	LEG3_MOUSE	Lgals3	LEG3_MOUSE		sp|P16110|LEG3_MOUSE Galectin-3 OS=Mus musculus OX=10090 GN=Lgals3 PE=1 SV=3	131.811	true	2	1	0	15.91	27515	10	4	4	4	4	6	6	4	3	2	4	2	2	4		3	3	0	1	2	0	0	1	0	1	1	430613	2.54238e+06	1.24506e+06	145519	1.46583e+06	1.00958e+06		2.73553e+06	1.31443e+06	317289	275116
451114	TOLIP_MOUSE	Tollip	TOLIP_MOUSE		sp|Q9QZ06|TOLIP_MOUSE Toll-interacting protein OS=Mus musculus OX=10090 GN=Tollip PE=1 SV=1	58.534	true	2	1	0	8.39	30345	14	2	2	2	2	2	2	2	1	1	1		2	2		1		0	1	0	0	0	0	0	1	0	1.60141e+06	153196	229160		301094	305248		1.45565e+06		1.0465e+06	8564.93
451430	IDHP_MOUSE	Idh2	IDHP_MOUSE		sp|P54071|IDHP_MOUSE Isocitrate dehydrogenase [NADP], mitochondrial OS=Mus musculus OX=10090 GN=Idh2 PE=1 SV=3	110.858	true	2	1	0	7.74	50906	32	4	4	4	4	6	6	4	2	2	4	1	4	4	1	3	1	0	0	0	0	4	0	0	2	0	320347	1.66664e+06	1.6724e+06	101106	5227259	1.68915e+06	18387.4	3.89157e+06	26896.9	86734.3	200808
451716	TR150_MOUSE	Thrap3	TR150_MOUSE		sp|Q569Z6|TR150_MOUSE Thyroid hormone receptor-associated protein 3 OS=Mus musculus OX=10090 GN=Thrap3 PE=1 SV=1	56.839	true	2	1	0	1.89	108178	58	2	2	2	2	2	2	2	2	2	2	2	2	2		2	2	0	0	0	0	1	0	0	0	1	148947	571468	309691	191216	1.2038e+06	275476		617724	176609	143374	200174
451744	DYR_MOUSE	Dhfr	DYR_MOUSE		sp|P00375|DYR_MOUSE Dihydrofolate reductase OS=Mus musculus OX=10090 GN=Dhfr PE=1 SV=3	29.056	true	2	1	0	5.35	21606	13	1	1	1	1	1	1	1	1	1	1	1	1	1		1	1	0	0	0	0	1	0	0	0	0	111829	409304	349610	170517	1.24113e+06	343908		648579	129160	111829	254009
451925	CBX3_MOUSE	Cbx3	CBX3_MOUSE		sp|P23198|CBX3_MOUSE Chromobox protein homolog 3 OS=Mus musculus OX=10090 GN=Cbx3 PE=1 SV=2	124.388	true	2	1	0	14.21	20855	9	3	3	3	3	3	3	3	1	3	3	1	3	3		3	1	0	0	0	0	0	1	0	2	0	637715	868244	893040	55563.9	4812894	984575		6124883	61434.6	27031.8	511680
450905	HNRPC_MOUSE	Hnrnpc	HNRPC_MOUSE		sp|Q9Z204|HNRPC_MOUSE Heterogeneous nuclear ribonucleoproteins C1/C2 OS=Mus musculus OX=10090 GN=Hnrnpc PE=1 SV=1	203.361	true	2	1	0	12.46	34385	22	6	6	6	6	12	12	6	4	5	6	4	6	6	1	6	3	0	1	1	2	3	2	0	2	1	3219109	2346098	3067566	1.43987e+06	7.84737e+06	8551730	18241.8	13621336	670468	565240	1.29484e+06
451632	ERP44_MOUSE	Erp44	ERP44_MOUSE		sp|Q9D1Q6|ERP44_MOUSE Endoplasmic reticulum resident protein 44 OS=Mus musculus OX=10090 GN=Erp44 PE=1 SV=1	77.659	true	2	1	0	6.16	46853	24	2	2	2	2	3	3	2	2		2	1	2	2		2	1	0	0	0	0	1	0	0	1	0	1.43571e+06		1.15755e+06	325932	3288008	1.45857e+06		3.35833e+06	57160.9	1188481	12408.4
451547	2AAA_MOUSE	Ppp2r1a	2AAA_MOUSE	2AAB_MOUSE	sp|Q76MZ3|2AAA_MOUSE Serine/threonine-protein phosphatase 2A 65 kDa regulatory subunit A alpha isoform OS=Mus musculus OX=10090 GN=Ppp2r1a PE=1 SV=3	257.746	true	2	1	1	12.9	65323	39	7	7	7	7	11	11	7	5	5	5	3	6	5		7	5	0	1	0	0	3	0	0	7	0	1.16278e+06	2.76603e+06	2.0649e+06	524886	6.83561e+06	1.11534e+06		21244468	1216460	1255505	1.56487e+06
450816	PAXI_MOUSE	Pxn	PAXI_MOUSE		sp|Q8VI36|PAXI_MOUSE Paxillin OS=Mus musculus OX=10090 GN=Pxn PE=1 SV=1	21.728	true	2	1	0	1.35	64476	32	1	1	1	1	1	1	1	1	1	1	1	1	1		1	1	0	0	0	0	1	0	0	0	0	207558	209797	280639	31638.2	1.13342e+06	148070		496044	123043	207558	130197
452069	ARH37_MOUSE	Arhgef37	ARH37_MOUSE		sp|A1IGU4|ARH37_MOUSE Rho guanine nucleotide exchange factor 37 OS=Mus musculus OX=10090 GN=Arhgef37 PE=2 SV=1	47.759	true	2	1	0	2.51	76523	41	1	1	1	1	1	1	1	1	1			1					0	0	0	0	1	0	0	0	0	146458	108126			238212					146458	67102.1
451091	RL10_MOUSE	Rpl10	RL10_MOUSE	RL10L_MOUSE	sp|Q6ZWV3|RL10_MOUSE 60S ribosomal protein L10 OS=Mus musculus OX=10090 GN=Rpl10 PE=1 SV=3	83.566	true	2	1	1	9.81	24603	12	2	2	2	2	5	5	2	1	1	1	1		2		1		1	1	1	1	0	0	0	1	0	831438	592780	780400	261071		810764		515778		155447	59749.8
450617	RFC4_MOUSE	Rfc4	RFC4_MOUSE		sp|Q99J62|RFC4_MOUSE Replication factor C subunit 4 OS=Mus musculus OX=10090 GN=Rfc4 PE=1 SV=1	34.068	true	2	1	0	2.75	39867	24	1	1	1	1	2	2	1	1	1	1		1	1		1	1	0	0	0	0	1	0	0	0	1	66647.1	564658	668865		505927	316136		618541	200159	66647.1	350420
451433	MGN2_MOUSE	Magohb	MGN2_MOUSE; MGN_MOUSE		sp|Q9CQL1|MGN2_MOUSE Protein mago nashi homolog 2 OS=Mus musculus OX=10090 GN=Magohb PE=2 SV=1	81.206	true	2	2	0	13.7	17092	14	2	2	2	2	5	5	2	2	2	2	2	2	2		2	2	0	1	0	1	1	0	0	1	1	1.40654e+06	847051	812738	1.29784e+06	4831390	4.00117e+06		5974802	1.57408e+06	1598633	606917
451124	K1C12_MOUSE	Krt12	K1C12_MOUSE		sp|Q64291|K1C12_MOUSE Keratin, type I cytoskeletal 12 OS=Mus musculus OX=10090 GN=Krt12 PE=1 SV=2	35.897	true	2	1	0	1.64	52464	25	1	1	1	1	2	2	1	1	1	1		1	1		1	1	0	1	0	0	1	0	0	0	0	6814991	1.07962e+06	141694		9661746	262227		17728990	286625	6814991	669999
451750	GDIR1_MOUSE	Arhgdia	GDIR1_MOUSE		sp|Q99PT1|GDIR1_MOUSE Rho GDP-dissociation inhibitor 1 OS=Mus musculus OX=10090 GN=Arhgdia PE=1 SV=3	146.356	true	2	1	0	22.55	23407	15	4	4	4	4	10	10	4	2	4	4	1	4	4	1	4	1	2	1	1	0	2	1	0	2	1	910643	3.38767e+06	3.39911e+06	191174	8600148	2.67135e+06	664897	6.25583e+06	1.05588e+06	73611	3380841
451592	IMPA2_MOUSE	Impa2	IMPA2_MOUSE		sp|Q91UZ5|IMPA2_MOUSE Inositol monophosphatase 2 OS=Mus musculus OX=10090 GN=Impa2 PE=1 SV=1	62.61	true	2	1	0	7.59	31716	16	2	2	2	2	5	5	2	1	2	2	1	1	2		1	1	1	1	1	0	1	1	0	0	0	1.45156e+06	1.24398e+06	885817	105351	452771	904327		254313	125781	28386.6	652646
451249	RUXE_MOUSE	Snrpe	RUXE_MOUSE		sp|P62305|RUXE_MOUSE Small nuclear ribonucleoprotein E OS=Mus musculus OX=10090 GN=Snrpe PE=1 SV=1	26.441	true	2	1	0	11.96	10803	4	1	1	1	1	1	1	1		1	1		1	1		1		0	0	1	0	0	0	0	0	0		467777	370956		1.81167e+06	216810		779041		12446.4	290297
450675	SGPL1_MOUSE	Sgpl1	SGPL1_MOUSE		sp|Q8R0X7|SGPL1_MOUSE Sphingosine-1-phosphate lyase 1 OS=Mus musculus OX=10090 GN=Sgpl1 PE=1 SV=1	24.625	true	2	1	0	1.23	63677	33	1	1	1	1	1	1	1	1	1	1	1	1	1	1	1	1	0	0	0	0	1	0	0	0	0	105643	1.26386e+06	402053	317571	673536	701535	2819.09	1.92862e+06	178630	105643	784339
450859	EIF3A_MOUSE	Eif3a	EIF3A_MOUSE		sp|P23116|EIF3A_MOUSE Eukaryotic translation initiation factor 3 subunit A OS=Mus musculus OX=10090 GN=Eif3a PE=1 SV=5	111.939	true	2	1	0	3.05	161936	88	5	5	5	5	6	6	5	4	5	5	3	5	5	1	5	3	0	0	0	1	2	1	0	2	0	604850	977753	1446705	706631	2.82428e+06	1.03272e+06	5417.53	6242502	179686	591254	637496
451900	SYDC_MOUSE	Dars1	SYDC_MOUSE		sp|Q922B2|SYDC_MOUSE Aspartate--tRNA ligase, cytoplasmic OS=Mus musculus OX=10090 GN=Dars1 PE=1 SV=2	330.47	true	2	1	0	22.95	57147	39	11	11	11	11	17	17	11	5	9	9	5	10	9	1	10	5	0	0	2	1	6	2	0	6	0	1.07283e+06	4.30925e+06	2297563	1.3204e+06	10279862	3.44474e+06	2997.54	19637662	554051	295442	1.71022e+06
450539	K2C72_MOUSE	Krt72	K2C72_MOUSE		sp|Q6IME9|K2C72_MOUSE Keratin, type II cytoskeletal 72 OS=Mus musculus OX=10090 GN=Krt72 PE=3 SV=1	353.621	true	2	1	0	8.46	56750	36	7	1	10	1	74	1	1		1	1	1	1	1		1		0	0	0	0	0	0	0	1	0	21676262	203865648	19199124	6044467	11476613	24104584	89494056	79939704	5573334	12446.4	156714
451459	DNJA2_MOUSE	Dnaja2	DNJA2_MOUSE		sp|Q9QYJ0|DNJA2_MOUSE DnaJ homolog subfamily A member 2 OS=Mus musculus OX=10090 GN=Dnaja2 PE=1 SV=1	23.788	true	2	1	0	1.94	45746	25	1	1	1	1	1	1	1	1	1	1	1	1	1		1	1	0	0	0	0	0	0	0	1	0	145438	190163	203367	85952.1	458983	111259		411211	62414.1	145438	118013
451098	TMOD3_MOUSE	Tmod3	TMOD3_MOUSE		sp|Q9JHJ0|TMOD3_MOUSE Tropomodulin-3 OS=Mus musculus OX=10090 GN=Tmod3 PE=1 SV=1	113.18	true	2	1	0	7.95	39503	24	3	3	3	3	3	3	3		2	3		3	2		3	1	0	0	0	0	3	0	0	0	0		322374	997885		1.51021e+06	825866		1.46367e+06	12212	12446.4	192183
450924	NACAM_MOUSE	Naca	NACAM_MOUSE; NACA_MOUSE		sp|P70670|NACAM_MOUSE Nascent polypeptide-associated complex subunit alpha, muscle-specific form OS=Mus musculus OX=10090 GN=Naca PE=1 SV=2	115.825	true	2	2	0	1.33	220499	107	2	2	2	2	2	2	2	1	2	2		2	2		2		0	0	0	0	0	0	0	2	0	1.06028e+06	2.42991e+06	1.43821e+06		4300015	1.29381e+06		18944328		13814	1649901
450991	SERA_MOUSE	Phgdh	SERA_MOUSE		sp|Q61753|SERA_MOUSE D-3-phosphoglycerate dehydrogenase OS=Mus musculus OX=10090 GN=Phgdh PE=1 SV=3	150.55	true	2	1	0	6.19	56586	25	3	3	3	3	8	8	3	2	3	3	2	3	3	1	3	2	0	1	2	0	2	1	0	2	0	837185	4.17019e+06	2216679	1.01225e+06	6.32748e+06	2.51192e+06	13937.1	12667185	1.27017e+06	1.03529e+06	2379525
451066	TCPH_MOUSE	Cct7	TCPH_MOUSE		sp|P80313|TCPH_MOUSE T-complex protein 1 subunit eta OS=Mus musculus OX=10090 GN=Cct7 PE=1 SV=1	246.983	true	2	1	0	17.1	59652	33	8	8	8	8	14	14	8	4	7	6	3	7	6		7	4	1	3	0	0	2	1	0	6	1	665128	4.02859e+06	3.71821e+06	629614	10284207	2.67353e+06		20051956	1.09453e+06	164764	3103316
450845	LUM_MOUSE	Lum	LUM_MOUSE		sp|P51885|LUM_MOUSE Lumican OS=Mus musculus OX=10090 GN=Lum PE=1 SV=2	25.886	true	2	1	0	2.66	38264	16	1	1	1	1	1	1	1	1			1	1					1	0	0	0	0	0	0	0	0	921895			107266	58724.4					921895	12408.4
451525	RM21_MOUSE	Mrpl21	RM21_MOUSE		sp|Q9D1N9|RM21_MOUSE 39S ribosomal protein L21, mitochondrial OS=Mus musculus OX=10090 GN=Mrpl21 PE=1 SV=1	20.232	true	2	1	0	4.31	23366	14	1	1	1	1	2	2	1	1	1	1	1	1	1		1		0	0	0	0	1	0	0	1	0	122986	92321	93333.1	38558.9	201413	59906.1		343900		122986	57293.4
452001	SYF1_MOUSE	Xab2	SYF1_MOUSE		sp|Q9DCD2|SYF1_MOUSE Pre-mRNA-splicing factor SYF1 OS=Mus musculus OX=10090 GN=Xab2 PE=1 SV=1	106.843	true	2	1	0	4.44	99986	55	4	4	4	4	5	5	4	3	3	2	1	2	4	2	3	1	0	0	0	0	0	3	0	1	1	1.91309e+06	2.147e+06	3061683	675564	6337810	3120646	13254.7	766802	442326	946236	653680
450618	CKAP4_MOUSE	Ckap4	CKAP4_MOUSE		sp|Q8BMK4|CKAP4_MOUSE Cytoskeleton-associated protein 4 OS=Mus musculus OX=10090 GN=Ckap4 PE=1 SV=2	235.596	true	2	1	0	8.17	63692	40	5	5	5	5	11	11	5	1	5	5	1	5	5		5	1	1	2	1	0	5	0	0	2	0	313168	2123043	1.92586e+06	362541	4.70002e+06	1.60589e+06		12345428	354452	25378.7	1.77975e+06
451764	FIBG_MOUSE	Fgg	FIBG_MOUSE		sp|Q8VCM7|FIBG_MOUSE Fibrinogen gamma chain OS=Mus musculus OX=10090 GN=Fgg PE=1 SV=1	35.525	true	2	1	0	1.83	49390	27	1	1	1	1	1	1	1		1	1		1	1		1		0	0	1	0	0	0	0	0	0		72130	215654		26280.6	46234.7		61878.1		12446.4	44763
451976	XDH_MOUSE	Xdh	XDH_MOUSE		sp|Q00519|XDH_MOUSE Xanthine dehydrogenase/oxidase OS=Mus musculus OX=10090 GN=Xdh PE=1 SV=5	31.99	true	2	1	0	0.9	146562	62	1	1	1	1	1	1	1		1	1		1	1				0	0	0	0	1	0	0	0	0		219414	203360		492898	133883				12446.4	136166
451319	ANXA3_MOUSE	Anxa3	ANXA3_MOUSE		sp|O35639|ANXA3_MOUSE Annexin A3 OS=Mus musculus OX=10090 GN=Anxa3 PE=1 SV=4	208.624	true	2	1	0	18.58	36384	24	6	6	6	6	15	15	5	2	4	5		4	5		4	4	0	1	2	0	3	3	0	4	1	2.1119e+06	12058409	4072366		8677634	4.30292e+06		18515350	1.05636e+06	52976.3	5562369
450696	PDLI1_MOUSE	Pdlim1	PDLI1_MOUSE		sp|O70400|PDLI1_MOUSE PDZ and LIM domain protein 1 OS=Mus musculus OX=10090 GN=Pdlim1 PE=1 SV=4	61.838	true	2	1	0	6.12	35774	19	2	2	2	2	3	3	2	1	1	1		2	1		1		0	0	1	0	2	0	0	0	0	80523.3	58179.3	112370		535908	95839.3		67071.7		55058	25896
451639	NCKPL_MOUSE	Nckap1l	NCKPL_MOUSE		sp|Q8K1X4|NCKPL_MOUSE Nck-associated protein 1-like OS=Mus musculus OX=10090 GN=Nckap1l PE=1 SV=1	21.941	true	2	1	0	0.88	128905	64	1	1	1	1	1	1	1		1	1		1	1		1	1	0	0	0	0	0	0	0	1	0		251016	247955		511834	176280		341337	9240.8	12446.4	155778
450787	MOES_MOUSE	Msn	MOES_MOUSE		sp|P26041|MOES_MOUSE Moesin OS=Mus musculus OX=10090 GN=Msn PE=1 SV=3	698.542	true	2	1	0	29.29	67767	39	21	17	22	18	47	37	18	12	11	13	6	13	13	3	12	13	5	3	6	1	8	5	0	6	3	8509410	14229454	18898032	5.05583e+06	49281776	22265620	562746	49860852	7621095	4441115	5.92951e+06
452122	HSP74_MOUSE	Hspa4	HSP74_MOUSE		sp|Q61316|HSP74_MOUSE Heat shock 70 kDa protein 4 OS=Mus musculus OX=10090 GN=Hspa4 PE=1 SV=1	352.247	true	2	1	0	13.56	94133	57	10	10	10	10	19	19	9	2	6	6	1	9	7		9	3	1	2	2	0	4	2	0	7	0	769303	2404726	3.2775e+06	51177.2	10674534	2.3259e+06		20954016	3.78219e+06	127906	2035980
451722	COR1B_MOUSE	Coro1b	COR1B_MOUSE		sp|Q9WUM3|COR1B_MOUSE Coronin-1B OS=Mus musculus OX=10090 GN=Coro1b PE=1 SV=1	0.097	true	2	1	0	1.45	53912	23	1	1	1	1	2	2	1	1	1	1	1	1	1	1	1	1	0	0	1	0	0	1	0	0	0	264955	633145	426309	249920	1.97487e+06	552622	2855.72	1.66549e+06	233734	264955	392922
450584	TBA1B_MOUSE	Tuba1b	TBA1B_MOUSE; TBA1C_MOUSE	TBA1A_MOUSE; TBA3_MOUSE; TBA8_MOUSE; TBAL3_MOUSE	sp|P05213|TBA1B_MOUSE Tubulin alpha-1B chain OS=Mus musculus OX=10090 GN=Tuba1b PE=1 SV=2	580.694	true	2	2	4	35.48	50151	23	14	4	16	4	52	16	4	2	4	4	2	4	3	1	4	1	2	4	1	0	2	1	0	4	2	5307959	40778356	31439216	3.82913e+06	69702000	31183002	114923	193711552	9384574	226484	14486014
451106	ACTN4_MOUSE	Actn4	ACTN4_MOUSE	ACTN1_MOUSE; ACTN2_MOUSE; ACTN3_MOUSE	sp|P57780|ACTN4_MOUSE Alpha-actinin-4 OS=Mus musculus OX=10090 GN=Actn4 PE=1 SV=1	660.434	true	2	1	3	20.5	104977	60	17	17	17	17	23	23	17	8	12	13	2	13	14	2	16	3	2	1	1	0	3	0	0	16	0	2.74421e+06	2.43008e+06	2.74691e+06	131495	6.49562e+06	2.13746e+06	9753.03	64272936	344029	1.27197e+06	1.59443e+06
450746	CYFP1_MOUSE	Cyfip1	CYFP1_MOUSE	CYFP2_MOUSE	sp|Q7TMB8|CYFP1_MOUSE Cytoplasmic FMR1-interacting protein 1 OS=Mus musculus OX=10090 GN=Cyfip1 PE=1 SV=1	132.703	true	2	1	1	2.55	145241	73	3	3	3	3	5	5	3	3	2	2	1	2	2		3	1	0	0	0	0	2	0	0	3	0	637090	396646	461806	51384.4	1.4635e+06	403531		4655112	79843.8	832536	196915
450962	PUR6_MOUSE	Paics	PUR6_MOUSE		sp|Q9DCL9|PUR6_MOUSE Multifunctional protein ADE2 OS=Mus musculus OX=10090 GN=Paics PE=1 SV=4	115.575	true	2	1	0	8.47	47006	27	3	3	3	3	4	4	3		3	3		3	3		3		0	1	0	0	1	0	0	2	0		696109	628440		1.33436e+06	571829		1467891		12446.4	417825
451514	NBEL2_MOUSE	Nbeal2	NBEL2_MOUSE		sp|Q6ZQA0|NBEL2_MOUSE Neurobeachin-like protein 2 OS=Mus musculus OX=10090 GN=Nbeal2 PE=1 SV=2	21.556	true	2	1	0	0.36	301924	136	1	1	1	1	1	1	1	1	1	1		1			1		0	0	0	0	0	0	0	1	0	117009	263923	32941.3		201084			296339		117009	163787
450602	TAGL2_MOUSE	Tagln2	TAGL2_MOUSE	TAGL3_MOUSE	sp|Q9WVA4|TAGL2_MOUSE Transgelin-2 OS=Mus musculus OX=10090 GN=Tagln2 PE=1 SV=4	267.277	true	2	1	1	32.66	22395	14	6	6	7	7	13	13	6	6	6	5	4	6	6	2	6	5	1	2	0	0	2	0	1	5	1	2.26638e+06	5.0369e+06	3.35558e+06	1.5048e+06	23347054	2418313	117562	12074068	2.18775e+06	1.70113e+06	3.40758e+06
452009	PSMD2_MOUSE	Psmd2	PSMD2_MOUSE		sp|Q8VDM4|PSMD2_MOUSE 26S proteasome non-ATPase regulatory subunit 2 OS=Mus musculus OX=10090 GN=Psmd2 PE=1 SV=1	195.507	true	2	1	0	7.49	100203	57	6	6	6	6	7	7	6	2	4	6	2	6	4	1	6	2	0	1	0	0	3	0	0	3	0	524490	1.96772e+06	1420599	1.02849e+06	5053039	568086	3681.31	21215292	125133	81055.1	999352
451563	BT3L4_MOUSE	Btf3l4	BT3L4_MOUSE		sp|Q9CQH7|BT3L4_MOUSE Transcription factor BTF3 homolog 4 OS=Mus musculus OX=10090 GN=Btf3l4 PE=1 SV=1	20.568	true	2	1	0	4.43	17270	10	1	1	1	1	1	1	1	1	1	1	1	1	1		1	1	0	0	0	0	0	0	0	1	0	134306	263935	180170	106052	843165	127819		708593	34105.7	134306	163795
451454	IF5A1_MOUSE	Eif5a	IF5A1_MOUSE	IF5A2_MOUSE	sp|P63242|IF5A1_MOUSE Eukaryotic translation initiation factor 5A-1 OS=Mus musculus OX=10090 GN=Eif5a PE=1 SV=2	85.873	true	2	1	1	20.78	16832	8	3	3	3	3	5	5	3	2	2	3		3	3		3	1	0	1	0	0	1	2	0	1	0	172069	1.12769e+06	1.92763e+06		1.16725e+06	1.68638e+06		4960010	75949	48955.6	432596
450742	PDIA1_MOUSE	P4hb	PDIA1_MOUSE		sp|P09103|PDIA1_MOUSE Protein disulfide-isomerase OS=Mus musculus OX=10090 GN=P4hb PE=1 SV=2	625.624	true	2	1	0	31.63	57058	39	17	17	18	18	45	45	18	11	12	15	6	16	14	2	16	12	1	6	5	0	11	7	0	11	4	5134520	16934670	18551504	3.23509e+06	50183284	15557019	15620.9	71965472	12635744	2982543	10976913
452050	NAA50_MOUSE	Naa50	NAA50_MOUSE		sp|Q6PGB6|NAA50_MOUSE N-alpha-acetyltransferase 50 OS=Mus musculus OX=10090 GN=Naa50 PE=1 SV=1	36.774	true	2	1	0	5.92	19414	12	1	1	1	1	2	2	1	1	1	1		1	1		1		0	0	0	0	1	0	0	1	0	115680	189431	169992		554556	180455		1030207		115680	117559
450588	G6PD1_MOUSE	G6pdx	G6PD1_MOUSE	G6PD2_MOUSE	sp|Q00612|G6PD1_MOUSE Glucose-6-phosphate 1-dehydrogenase X OS=Mus musculus OX=10090 GN=G6pdx PE=1 SV=3	378.213	true	2	1	1	24.27	59263	35	12	12	12	12	24	24	12	7	8	11	5	11	9	2	11	6	3	3	2	1	4	1	0	8	0	3871265	7.98182e+06	8630776	2.32146e+06	22315504	6353304	50786.3	53436880	4.06378e+06	3.73372e+06	4518046
451940	DNJB6_MOUSE	Dnajb6	DNJB6_MOUSE		sp|O54946|DNJB6_MOUSE DnaJ homolog subfamily B member 6 OS=Mus musculus OX=10090 GN=Dnajb6 PE=1 SV=4	54.674	true	2	1	0	3.56	39806	17	1	1	1	1	1	1	1	1	1	1		1			1		0	0	0	0	0	0	0	1	0	170369	147482	113348		258798			776186		170369	91525.7
451231	DX39A_MOUSE	Ddx39a	DX39A_MOUSE; DX39B_MOUSE		sp|Q8VDW0|DX39A_MOUSE ATP-dependent RNA helicase DDX39A OS=Mus musculus OX=10090 GN=Ddx39a PE=1 SV=1	72.586	true	2	2	0	5.85	49067	24	3	3	3	3	3	3	3	1	3	2	1	3	3	1	3		0	1	0	0	0	1	0	1	0	16601.7	2.42461e+06	1.32166e+06	15095.5	3447605	1.84827e+06	3044.14	9661640		13185.1	1.60985e+06
451576	PCNP_MOUSE	Pcnp	PCNP_MOUSE		sp|Q6P8I4|PCNP_MOUSE PEST proteolytic signal-containing nuclear protein OS=Mus musculus OX=10090 GN=Pcnp PE=1 SV=1	75.803	true	2	1	0	14.04	18963	10	2	2	2	2	2	2	2	1	2	1	1	2	1		1	1	0	0	0	0	2	0	0	0	0	163093	403395	529672	135046	1.86362e+06	189716		346188	134742	57831.9	254227
452137	RL8_MOUSE	Rpl8	RL8_MOUSE		sp|P62918|RL8_MOUSE 60S ribosomal protein L8 OS=Mus musculus OX=10090 GN=Rpl8 PE=1 SV=2	104.967	true	2	1	0	13.62	28024	13	3	3	3	3	15	15	3	3	3	2	3	3	2	1	2	3	2	1	2	5	1	1	1	0	1	41150612	4801049	18216380	4883640	47680124	24278388	13014089	66307080	4660054	128030248	4.46422e+06
451343	TXLNA_MOUSE	Txlna	TXLNA_MOUSE		sp|Q6PAM1|TXLNA_MOUSE Alpha-taxilin OS=Mus musculus OX=10090 GN=Txlna PE=1 SV=1	39.125	true	2	1	0	1.62	62369	34	1	1	1	1	1	1	1	1	1	1	1	1	1		1	1	0	0	0	0	0	0	0	1	0	87188.8	82694.8	63784.7	24249.2	139363	64231.9		271588	5965.07	87188.8	51319.4
450580	CY24A_MOUSE	Cyba	CY24A_MOUSE		sp|Q61462|CY24A_MOUSE Cytochrome b-245 light chain OS=Mus musculus OX=10090 GN=Cyba PE=1 SV=3	43.438	true	2	1	0	8.85	20748	9	2	2	2	2	2	2	2	1	2	1		2	1		1		0	0	0	0	2	0	0	0	0	248037	445433	505976		1.20614e+06	133978		5051972		87898.8	417881
451711	ARAP1_MOUSE	Arap1	ARAP1_MOUSE		sp|Q4LDD4|ARAP1_MOUSE Arf-GAP with Rho-GAP domain, ANK repeat and PH domain-containing protein 1 OS=Mus musculus OX=10090 GN=Arap1 PE=1 SV=2	33.667	true	2	1	0	0.69	162276	75	1	1	1	1	1	1	1	1	1	1		1	1				0	0	0	0	1	0	0	0	0	49499.1	129882	103417		244840	96433.6				49499.1	80603.4
450988	EIF3H_MOUSE	Eif3h	EIF3H_MOUSE		sp|Q91WK2|EIF3H_MOUSE Eukaryotic translation initiation factor 3 subunit H OS=Mus musculus OX=10090 GN=Eif3h PE=1 SV=1	62.851	true	2	1	0	8.24	39832	24	3	3	3	3	3	3	3	3	3	3	2	3	2		3	2	0	0	1	0	1	0	0	1	0	723153	849606	802603	618334	2.17689e+06	342485		6.14122e+06	553971	836032	609397
450730	HA10_MOUSE	H2-Q10	HA10_MOUSE; HA11_MOUSE; HA12_MOUSE; HA13_MOUSE; HA17_MOUSE; HA18_MOUSE; HA1B_MOUSE; HA1K_MOUSE; HA1L_MOUSE; HA1Q_MOUSE; HA1W_MOUSE; HA1Y_MOUSE; HA1Z_MOUSE		sp|P01898|HA10_MOUSE H-2 class I histocompatibility antigen, Q10 alpha chain OS=Mus musculus OX=10090 GN=H2-Q10 PE=1 SV=3	26.272	true	2	13	0	3.08	37251	21	1	1	1	1	2	2	1	1	1	1		1	1		1	1	0	0	0	0	1	0	0	0	1	379157	671519	710898		2.08179e+06	500139		1.07359e+06	578850	379157	416737
451516	XPO1_MOUSE	Xpo1	XPO1_MOUSE		sp|Q6P5F9|XPO1_MOUSE Exportin-1 OS=Mus musculus OX=10090 GN=Xpo1 PE=1 SV=1	49.049	true	2	1	0	1.59	123093	58	2	2	2	2	3	3	1	1	1	1	1	1	1		1		0	0	0	0	1	0	0	1	0	98796.8	184386	213610	117734	615544	236472		999780		98796.8	114428
451221	MIC60_MOUSE	Immt	MIC60_MOUSE		sp|Q8CAQ8|MIC60_MOUSE MICOS complex subunit Mic60 OS=Mus musculus OX=10090 GN=Immt PE=1 SV=1	142.273	true	2	1	0	6.61	83900	54	4	4	4	4	5	5	4	2	3	4	1	3	4	1	4	1	0	0	0	0	1	0	0	4	0	205746	2.23572e+06	1.00699e+06	83089.1	1512520	619847	3638.95	4840008	121619	44085.5	1078562
451846	AP1M1_MOUSE	Ap1m1	AP1M1_MOUSE		sp|P35585|AP1M1_MOUSE AP-1 complex subunit mu-1 OS=Mus musculus OX=10090 GN=Ap1m1 PE=1 SV=3	37.765	true	2	1	0	3.07	48543	31	1	1	1	1	1	1	1	1	1	1		1			1		0	1	0	0	0	0	0	0	0	134651	100015	25628.4		190312			86246.9		134651	62068.4
450772	UBA1_MOUSE	Uba1	UBA1_MOUSE	UBA1Y_MOUSE	sp|Q02053|UBA1_MOUSE Ubiquitin-like modifier-activating enzyme 1 OS=Mus musculus OX=10090 GN=Uba1 PE=1 SV=1	388.929	true	2	1	1	10.68	117809	58	9	9	9	9	17	17	9	4	9	9	4	8	7	2	9	5	0	2	2	0	5	0	0	5	3	2.13289e+06	22859110	13721578	509986	21621220	17634768	28946	53885360	1603448	612704	12810319
451739	PSME1_MOUSE	Psme1	PSME1_MOUSE		sp|P97371|PSME1_MOUSE Proteasome activator complex subunit 1 OS=Mus musculus OX=10090 GN=Psme1 PE=1 SV=2	258.725	true	2	1	0	28.92	28673	18	7	7	7	7	9	9	7	2	6	6		7	7		7	1	0	2	1	0	3	1	0	2	0	256909	2186997	1.77956e+06		5.36196e+06	2.15016e+06		10018927	32750.1	21246	1.29189e+06
451753	NFKB1_MOUSE	Nfkb1	NFKB1_MOUSE		sp|P25799|NFKB1_MOUSE Nuclear factor NF-kappa-B p105 subunit OS=Mus musculus OX=10090 GN=Nfkb1 PE=1 SV=2	34.632	true	2	1	0	0.82	105614	54	1	1	1	1	1	1	1	1	1	1	1	1	1		1	1	0	0	0	0	0	0	0	1	0	82445.9	124447	109398	47734.4	38339.9	80513.5		229657	15674	82445.9	77230.1
450821	MYH4_MOUSE	Myh4	MYH4_MOUSE	MYH3_MOUSE; MYH6_MOUSE; MYH7B_MOUSE; MYH7_MOUSE	sp|Q5SX39|MYH4_MOUSE Myosin-4 OS=Mus musculus OX=10090 GN=Myh4 PE=2 SV=1	398.913	true	2	1	4	5.98	222859	127	12	1	12	1	13	1	1		1	1					1		0	1	0	0	0	0	0	0	0	370722	13403536	5968479	610710	2.31805e+06	40268.6	24141.4	720526	89864.2	12446.4	265718
452097	ERAP1_MOUSE	Erap1	ERAP1_MOUSE		sp|Q9EQH2|ERAP1_MOUSE Endoplasmic reticulum aminopeptidase 1 OS=Mus musculus OX=10090 GN=Erap1 PE=1 SV=2	73.637	true	2	1	0	2.37	106599	52	2	2	2	2	5	5	2	1	2	2		2	1		2		0	1	1	0	2	0	0	1	0	134522	478326	520189		1.347e+06	154974		944185		22528.8	331033
451131	RUVB1_MOUSE	Ruvbl1	RUVB1_MOUSE		sp|P60122|RUVB1_MOUSE RuvB-like 1 OS=Mus musculus OX=10090 GN=Ruvbl1 PE=1 SV=1	108.693	true	2	1	0	6.58	50214	24	3	3	3	3	3	3	3	1	2	3	2	2	3		3	1	0	0	0	0	2	0	0	1	0	301399	1.00917e+06	933545	256121	2004433	650287		3.43564e+06	31265.3	43300.2	683881
451856	FBX50_MOUSE	Nccrp1	FBX50_MOUSE		sp|G3X9C2|FBX50_MOUSE F-box only protein 50 OS=Mus musculus OX=10090 GN=Nccrp1 PE=1 SV=2	194.632	true	2	1	0	12.03	30408	18	5	5	5	5	18	18	5	3	3	5	3	3	5		5	4	2	2	3	1	2	3	0	4	0	4.94913e+06	4.56088e+06	2080885	2.46504e+06	2441441	2.67312e+06		27940162	452545	917571	3.01892e+06
451820	SGT1_MOUSE	Sugt1	SGT1_MOUSE		sp|Q9CX34|SGT1_MOUSE Protein SGT1 homolog OS=Mus musculus OX=10090 GN=Sugt1 PE=1 SV=3	10.472	true	2	1	0	2.08	38159	23	1	1	1	1	1	1	1	1	1	1	1	1			1	1	0	0	0	0	1	0	0	0	0	48092.8	1.6636e+06	94393.7	18896.8	491697			732584	32056.5	48092.8	1.03241e+06
451407	EIF3E_MOUSE	Eif3e	EIF3E_MOUSE		sp|P60229|EIF3E_MOUSE Eukaryotic translation initiation factor 3 subunit E OS=Mus musculus OX=10090 GN=Eif3e PE=1 SV=1	120.431	true	2	1	0	10.11	52220	32	4	4	4	4	6	6	4	2	4	4	2	4	4		4	1	0	1	0	0	2	0	0	3	0	641113	1.21827e+06	1.46374e+06	511694	3599792	1.41725e+06		11156906	256596	117305	878244
450797	RL18_MOUSE	Rpl18	RL18_MOUSE		sp|P35980|RL18_MOUSE 60S ribosomal protein L18 OS=Mus musculus OX=10090 GN=Rpl18 PE=1 SV=3	278.631	true	2	1	0	27.13	21645	9	6	6	6	6	39	39	6	5	5	5	5	5	4	3	3	4	3	3	3	18	2	2	3	1	4	217322768	21756234	50717128	85697768	42525252	29331696	14154839	40093284	26731350	232204672	11682293
451423	ROA3_MOUSE	Hnrnpa3	ROA3_MOUSE		sp|Q8BG05|ROA3_MOUSE Heterogeneous nuclear ribonucleoprotein A3 OS=Mus musculus OX=10090 GN=Hnrnpa3 PE=1 SV=1	308.282	true	2	1	0	21.11	39652	20	8	7	8	7	27	26	7	5	4	6	2	6	6	1	7	3	3	1	3	1	5	5	0	7	1	8922385	4.3261e+06	5521586	2.34584e+06	38660212	10527274	134887	18113658	2731967	7477404	3.758e+06
452108	IMB1_MOUSE	Kpnb1	IMB1_MOUSE		sp|P70168|IMB1_MOUSE Importin subunit beta-1 OS=Mus musculus OX=10090 GN=Kpnb1 PE=1 SV=2	282.171	true	2	1	0	9.82	97184	44	7	7	8	8	15	15	8	5	4	8	1	7	8		8	3	1	1	4	0	2	1	0	5	0	1.64158e+06	1132600	3419578	519748	5.22425e+06	2.36498e+06		22704644	1.08718e+06	2.01376e+06	213881
451022	MARC2_MOUSE	Mtarc2	MARC2_MOUSE		sp|Q922Q1|MARC2_MOUSE Mitochondrial amidoxime reducing component 2 OS=Mus musculus OX=10090 GN=Mtarc2 PE=1 SV=1	72.935	true	2	1	0	5.03	38194	20	2	2	2	2	2	2	2	2	2	2	2	2	2		1	2	0	0	0	0	1	0	0	0	1	167028	414003	540341	85605.4	1381352	234706		449912	272853	136469	241486
450871	TOP2B_MOUSE	Top2b	TOP2B_MOUSE		sp|Q64511|TOP2B_MOUSE DNA topoisomerase 2-beta OS=Mus musculus OX=10090 GN=Top2b PE=1 SV=2	73.993	true	2	1	0	1.3	181909	101	2	1	2	1	2	1	1	1	1	1		1	1		1		0	0	0	0	0	0	0	1	0	607292	149082	354366		1177589	297323		2.04733e+06		206631	92518.7
452144	MOCS3_MOUSE	Mocs3	MOCS3_MOUSE		sp|A2BDX3|MOCS3_MOUSE Adenylyltransferase and sulfurtransferase MOCS3 OS=Mus musculus OX=10090 GN=Mocs3 PE=1 SV=1	30.888	true	2	1	0	1.96	49375	29	1	1	1	1	2	2	1	1	1	1	1	1	1		1	1	0	0	0	1	1	0	0	0	0	744989	273924	299059	354011	763482	569251		1.37785e+06	130793	744989	169994
451612	ATPO_MOUSE	Atp5po	ATPO_MOUSE		sp|Q9DB20|ATPO_MOUSE ATP synthase subunit O, mitochondrial OS=Mus musculus OX=10090 GN=Atp5po PE=1 SV=1	22.276	true	2	1	0	3.29	23364	14	1	1	1	1	1	1	1	1	1	1	1	1	1	1	1	1	0	0	0	0	0	0	0	0	1	435569	664597	778602	445790	1.56847e+06	576865	6079.73	955855	439011	435569	412441
450507	RAB8A_MOUSE	Rab8a	RAB8A_MOUSE	RAB12_MOUSE; RAB13_MOUSE; RAB26_MOUSE; RAB30_MOUSE; RAB37_MOUSE; RAB3A_MOUSE; RAB3B_MOUSE; RAB3C_MOUSE; RAB3D_MOUSE; RAB43_MOUSE; RB39B_MOUSE	sp|P55258|RAB8A_MOUSE Ras-related protein Rab-8A OS=Mus musculus OX=10090 GN=Rab8a PE=1 SV=2	137.438	true	2	1	11	17.87	23668	17	4	1	4	1	9	3	1	1	1			1	1		1		0	0	0	0	2	0	0	1	0	5213266	4414663	6.51602e+06	981349	14536737	5045956	7378.14	50641072	372022	573117	344323
451416	PCKGM_MOUSE	Pck2	PCKGM_MOUSE		sp|Q8BH04|PCKGM_MOUSE Phosphoenolpyruvate carboxykinase [GTP], mitochondrial OS=Mus musculus OX=10090 GN=Pck2 PE=1 SV=1	32.131	true	2	1	0	1.25	70528	37	1	1	1	1	1	1	1	1	1	1	1	1			1	1	0	0	0	0	1	0	0	0	0	266338	363758	326885	39384.4	768628			784674	118101	266338	225744
451270	PRP19_MOUSE	Prpf19	PRP19_MOUSE		sp|Q99KP6|PRP19_MOUSE Pre-mRNA-processing factor 19 OS=Mus musculus OX=10090 GN=Prpf19 PE=1 SV=1	123.767	true	2	1	0	9.13	55239	22	5	5	6	6	11	11	6	4	5	6	4	6	6	1	5	4	1	0	0	1	3	3	0	3	0	1.81104e+06	2190945	2.07114e+06	1.02656e+06	12420389	6194310	18350.5	7806079	423607	1.55103e+06	1.42357e+06
451948	ZN768_MOUSE	Znf768	ZN768_MOUSE		sp|Q8R0T2|ZN768_MOUSE Zinc finger protein 768 OS=Mus musculus OX=10090 GN=Znf768 PE=1 SV=1	40.241	true	2	1	0	1.76	62711	40	1	1	1	1	1	1	1	1		1			1		1		0	0	1	0	0	0	0	0	0	240321		325228			241819		343444		240321	12408.4
451865	DNMT1_MOUSE	Dnmt1	DNMT1_MOUSE		sp|P13864|DNMT1_MOUSE DNA (cytosine-5)-methyltransferase 1 OS=Mus musculus OX=10090 GN=Dnmt1 PE=1 SV=5	211.137	true	2	1	0	4.38	183189	97	7	7	7	7	10	10	6	2	6	5	2	5	3		5	2	0	2	1	0	3	0	0	3	0	318843	1.35425e+06	988662	130712	3.91494e+06	571484		11028782	27309.5	68759	1121241
451917	IF2P_MOUSE	Eif5b	IF2P_MOUSE		sp|Q05D44|IF2P_MOUSE Eukaryotic translation initiation factor 5B OS=Mus musculus OX=10090 GN=Eif5b PE=1 SV=2	188.838	true	2	1	0	4.93	137616	57	5	5	5	5	7	7	5	4	1	4	2	3	5		4	1	2	0	0	1	0	2	0	2	0	1.79681e+06	451585	696714	785591	1.68442e+06	3.278e+06		2.85111e+06	204708	1.83958e+06	14026.4
451858	LEG1_MOUSE	Lgals1	LEG1_MOUSE		sp|P16045|LEG1_MOUSE Galectin-1 OS=Mus musculus OX=10090 GN=Lgals1 PE=1 SV=3	31.916	true	2	1	0	5.93	14866	10	1	1	1	1	4	4	1	1	1	1		1	1		1	1	1	0	1	0	0	0	0	1	1	551941	700231	809118		2.55514e+06	612482		1.64486e+06	533746	551941	434556
451588	ITAM_MOUSE	Itgam	ITAM_MOUSE		sp|P05555|ITAM_MOUSE Integrin alpha-M OS=Mus musculus OX=10090 GN=Itgam PE=1 SV=2	72.734	true	2	1	0	1.73	127481	52	2	2	2	2	4	4	2	1	2	2		2	2		1		0	1	1	0	2	0	0	0	0	115789	622645	689437		1.69711e+06	570972		972946		7563.91	405661
451939	KCRM_MOUSE	Ckm	KCRM_MOUSE		sp|P07310|KCRM_MOUSE Creatine kinase M-type OS=Mus musculus OX=10090 GN=Ckm PE=1 SV=1	25.864	true	2	1	0	1.84	43045	25	1	1	1	1	1	1	1		1	1		1	1		1		0	0	1	0	0	0	0	0	0		326348	206791		265429	62533.7		176916		12446.4	202527
451318	LRC59_MOUSE	Lrrc59	LRC59_MOUSE		sp|Q922Q8|LRC59_MOUSE Leucine-rich repeat-containing protein 59 OS=Mus musculus OX=10090 GN=Lrrc59 PE=1 SV=1	88.688	true	2	1	0	11.4	34877	17	3	3	3	3	3	3	3	2	3	2	1	3	2		3	1	0	0	0	0	2	0	0	1	0	112893	1.13738e+06	772631	64314.4	2.603e+06	247750		2601814	18223.4	78702.7	584989
451884	SRRM1_MOUSE	Srrm1	SRRM1_MOUSE		sp|Q52KI8|SRRM1_MOUSE Serine/arginine repetitive matrix protein 1 OS=Mus musculus OX=10090 GN=Srrm1 PE=1 SV=2	160.561	true	2	1	0	6.87	106862	54	6	6	6	6	7	7	6	2	4	6	2	4	5		4	3	0	0	4	0	1	1	0	0	1	211659	705652	4.03588e+06	320373	1909985	2.02599e+06		1.67712e+06	248997	50358.6	442169
450565	K1C25_MOUSE	Krt25	K1C25_MOUSE; K1C27_MOUSE		sp|Q8VCW2|K1C25_MOUSE Keratin, type I cytoskeletal 25 OS=Mus musculus OX=10090 GN=Krt25 PE=1 SV=1	109.615	true	2	2	0	3.59	48921	23	2	1	3	1	337	2	1	1	1	1	1	1	1	1	1	1	0	0	0	0	1	0	1	0	0	429833504	1783962240	256624736	55722940	55579152	852045504	244083280	297842464	50302132	127147	1.09936e+06
451599	THIO_MOUSE	Txn	THIO_MOUSE		sp|P10639|THIO_MOUSE Thioredoxin OS=Mus musculus OX=10090 GN=Txn PE=1 SV=3	125.045	true	2	1	0	20.95	11675	7	2	2	2	2	16	16	2	2	2	2	1	2	2	1	2	2	2	2	2	1	1	1	3	2	2	21954290	28857080	15224464	23134230	31023002	16717807	1.603e+06	76951240	467163	19011434	15703722
451218	NONO_MOUSE	Nono	NONO_MOUSE		sp|Q99K48|NONO_MOUSE Non-POU domain-containing octamer-binding protein OS=Mus musculus OX=10090 GN=Nono PE=1 SV=3	220.179	true	2	1	0	10.57	54541	26	5	4	7	6	22	10	6	4	5	4	4	5	4	2	4	3	2	0	0	3	2	0	1	2	0	16677568	6.10195e+06	7413909	15258278	19631412	7103285	2.05727e+06	18245740	2.02487e+06	3.33913e+06	1.19412e+06
450626	DDX3Y_MOUSE	Ddx3y	DDX3Y_MOUSE	DDX4_MOUSE	sp|Q62095|DDX3Y_MOUSE ATP-dependent RNA helicase DDX3Y OS=Mus musculus OX=10090 GN=Ddx3y PE=1 SV=2	186.42	true	2	1	1	8.97	73428	45	6	1	7	1	9	1	1	1	1	1		1	1		1		0	0	0	0	0	1	0	0	0	1.94238e+06	2028729	1.64779e+06	934144	3130380	2247642	6510.51	15909109	807827	130562	52133
452020	CAN2_MOUSE	Capn2	CAN2_MOUSE		sp|O08529|CAN2_MOUSE Calpain-2 catalytic subunit OS=Mus musculus OX=10090 GN=Capn2 PE=1 SV=4	20.113	true	2	1	0	1.14	79872	38	1	1	1	1	1	1	1	1	1	1		1	1		1		0	0	1	0	0	0	0	0	0	64532.3	267446	210415		650406	124193		721633		64532.3	165974
451634	AP3M1_MOUSE	Ap3m1	AP3M1_MOUSE; AP3M2_MOUSE		sp|Q9JKC8|AP3M1_MOUSE AP-3 complex subunit mu-1 OS=Mus musculus OX=10090 GN=Ap3m1 PE=1 SV=1	12.827	true	2	2	0	2.39	46936	24	1	1	1	1	1	1	1	1	1	1		1	1		1		0	1	0	0	0	0	0	0	0	119589	192315	148620		494858	122811		665654		119589	119349
450864	NC2A_MOUSE	Drap1	NC2A_MOUSE		sp|Q9D6N5|NC2A_MOUSE Dr1-associated corepressor OS=Mus musculus OX=10090 GN=Drap1 PE=1 SV=3	28.578	true	2	1	0	5.37	22278	9	1	1	1	1	1	1	1	1	1	1		1	1		1		0	0	0	0	0	0	0	1	0	112725	172326	174500		427264	69919.3		654764		112725	106943
450950	PKP3_MOUSE	Pkp3	PKP3_MOUSE		sp|Q9QY23|PKP3_MOUSE Plakophilin-3 OS=Mus musculus OX=10090 GN=Pkp3 PE=1 SV=2	44.485	true	2	1	0	1.13	87331	53	1	1	1	1	1	1	1	1	1	1	1		1		1		0	0	0	0	0	0	0	1	0	183587	327809	139834	57333		119843		1.62099e+06		183587	203434
450839	AP2B1_MOUSE	Ap2b1	AP2B1_MOUSE		sp|Q9DBG3|AP2B1_MOUSE AP-2 complex subunit beta OS=Mus musculus OX=10090 GN=Ap2b1 PE=1 SV=1	68.326	true	2	1	0	2.77	104583	48	3	1	3	1	3	1	1	1	1	1		1	1		1	1	0	0	0	0	1	0	0	0	0	613154	734328	1.22695e+06	110836	2676224	576857		6.27243e+06	240737	311118	264113
451828	RS2_MOUSE	Rps2	RS2_MOUSE		sp|P25444|RS2_MOUSE 40S ribosomal protein S2 OS=Mus musculus OX=10090 GN=Rps2 PE=1 SV=3	151.029	true	2	1	0	19.8	31231	22	5	5	5	5	17	17	5	4	3	5	2	5	5	1	5	2	1	2	1	2	3	1	1	4	2	4.75589e+06	6371013	7.3343e+06	405524	15828503	6186536	1.01461e+06	42128160	2.90543e+06	2.5837e+06	3.76645e+06
451167	LKHA4_MOUSE	Lta4h	LKHA4_MOUSE		sp|P24527|LKHA4_MOUSE Leukotriene A-4 hydrolase OS=Mus musculus OX=10090 GN=Lta4h PE=1 SV=4	263.954	true	2	1	0	14.73	69051	40	9	9	9	9	15	15	9	5	8	8	2	8	8	1	8	6	1	2	1	0	4	1	0	4	2	1.62653e+06	3.22984e+06	4731134	482932	9160414	3305602	183107	11694635	1.35465e+06	1.62054e+06	2.84145e+06
451832	GLYR1_MOUSE	Glyr1	GLYR1_MOUSE		sp|Q922P9|GLYR1_MOUSE Putative oxidoreductase GLYR1 OS=Mus musculus OX=10090 GN=Glyr1 PE=1 SV=1	28.725	true	2	1	0	1.47	59714	32	1	1	1	1	1	1	1	1	1	1		1	1		1		0	0	0	0	0	0	0	1	0	121254	89834.8	99779.8		219826	59309.4		204869		121254	55750.4
452056	SNX12_MOUSE	Snx12	SNX12_MOUSE		sp|O70493|SNX12_MOUSE Sorting nexin-12 OS=Mus musculus OX=10090 GN=Snx12 PE=1 SV=1	16.799	true	2	1	0	4.24	19116	11	1	1	1	1	1	1	1	1	1	1	1	1	1		1	1	0	0	0	0	1	0	0	0	0	206446	288767	216680	103173	822570	111874		986068	32460.4	206446	179205
451890	PRDX1_MOUSE	Prdx1	PRDX1_MOUSE		sp|P35700|PRDX1_MOUSE Peroxiredoxin-1 OS=Mus musculus OX=10090 GN=Prdx1 PE=1 SV=1	343.875	true	2	1	0	34.67	22176	15	8	7	9	8	42	34	8	7	7	7	5	7	7	3	7	6	4	4	2	2	8	3	1	8	2	25694908	51722672	24749376	5172005	55622168	23678946	3.87016e+06	606671552	8737763	28251838	28782674
450604	LMNA_MOUSE	Lmna	LMNA_MOUSE		sp|P48678|LMNA_MOUSE Prelamin-A/C OS=Mus musculus OX=10090 GN=Lmna PE=1 SV=2	949.435	true	2	1	0	31.88	74238	46	25	24	26	25	59	55	25	20	15	19	14	18	19	8	23	12	10	3	2	6	4	5	2	19	2	34142896	18954552	7.92548e+06	8772952	18530936	11842671	622005	279230752	3.75167e+06	36405716	7.93242e+06
450508	RAB14_MOUSE	Rab14	RAB14_MOUSE	RAB12_MOUSE; RAB26_MOUSE; RAB30_MOUSE; RAB37_MOUSE; RAB3A_MOUSE; RAB3B_MOUSE; RAB3C_MOUSE; RAB3D_MOUSE; RAB43_MOUSE; RB39B_MOUSE	sp|Q91V41|RAB14_MOUSE Ras-related protein Rab-14 OS=Mus musculus OX=10090 GN=Rab14 PE=1 SV=3	168.941	true	2	1	10	38.6	23896	16	6	5	6	5	8	6	5	3	3	3	1	2	2	1	4	1	0	1	1	0	0	0	1	3	0	2.55777e+06	7597658	3.78898e+06	781991	8002603	2931469	389504	32392900	831153	782322	4.32863e+06
452117	EIF2A_MOUSE	Eif2a	EIF2A_MOUSE		sp|Q8BJW6|EIF2A_MOUSE Eukaryotic translation initiation factor 2A OS=Mus musculus OX=10090 GN=Eif2a PE=1 SV=2	40.597	true	2	1	0	1.72	64403	37	1	1	1	1	2	2	1	1	1	1		1	1		1		0	0	1	0	0	0	0	1	0	116113	211475	191387		436290	92381.8		866988		116113	131239
451410	RL3_MOUSE	Rpl3	RL3_MOUSE		sp|P27659|RL3_MOUSE 60S ribosomal protein L3 OS=Mus musculus OX=10090 GN=Rpl3 PE=1 SV=3	451.221	true	2	1	0	32.26	46110	21	13	13	15	15	43	43	15	12	6	10	8	9	7	5	10	7	10	2	0	6	2	4	7	6	6	31548234	3572930	8276909	14429956	16664199	13091355	3.7129e+06	36901524	6127783	100965088	906529
452054	CHERP_MOUSE	Cherp	CHERP_MOUSE		sp|Q8CGZ0|CHERP_MOUSE Calcium homeostasis endoplasmic reticulum protein OS=Mus musculus OX=10090 GN=Cherp PE=1 SV=1	20.643	true	2	1	0	0.85	106169	37	1	1	1	1	1	1	1	1	1	1		1	1		1		0	0	0	0	0	0	0	1	0	328632	72447.5	72940.2		234204	73233.8		317241		328632	44960.1
450815	GUAA_MOUSE	Gmps	GUAA_MOUSE		sp|Q3THK7|GUAA_MOUSE GMP synthase [glutamine-hydrolyzing] OS=Mus musculus OX=10090 GN=Gmps PE=1 SV=2	66.058	true	2	1	0	3.32	76723	49	2	2	2	2	2	2	1		1	1		1	1				0	0	0	0	1	0	0	0	0		467395	166431		562663	136173				12446.4	290060
451084	AN32B_MOUSE	Anp32b	AN32B_MOUSE		sp|Q9EST5|AN32B_MOUSE Acidic leucine-rich nuclear phosphoprotein 32 family member B OS=Mus musculus OX=10090 GN=Anp32b PE=1 SV=1	76.573	true	2	1	0	12.13	31079	12	4	2	4	2	4	2	2	1	2	2	1	2	2	1	2	1	0	0	0	0	1	1	0	0	0	647960	2733214	2247992	1.96489e+06	7.76283e+06	2.32456e+06	8587.31	4.81249e+06	1.23103e+06	12693.9	934664
450848	MCM6_MOUSE	Mcm6	MCM6_MOUSE		sp|P97311|MCM6_MOUSE DNA replication licensing factor MCM6 OS=Mus musculus OX=10090 GN=Mcm6 PE=1 SV=1	179.141	true	2	1	0	6.7	92867	58	4	4	4	4	11	11	4	2	4	3	2	3	3		4	2	0	2	1	1	4	0	0	3	0	372592	1.57588e+06	1.17735e+06	417033	3.17799e+06	1.01306e+06		2.50032e+06	343197	219719	1.26944e+06
451002	GRP75_MOUSE	Hspa9	GRP75_MOUSE		sp|P38647|GRP75_MOUSE Stress-70 protein, mitochondrial OS=Mus musculus OX=10090 GN=Hspa9 PE=1 SV=3	279.748	true	2	1	0	13.55	73461	44	7	6	7	6	16	11	5	3	3	5	1	5	3		4	2	0	1	5	0	1	2	0	1	0	494590	1.2658e+06	3.18156e+06	40597.5	3.80918e+06	1.88772e+06		18989686	8353358	660174	356967
451506	B4GN1_MOUSE	B4galnt1	B4GN1_MOUSE		sp|Q09200|B4GN1_MOUSE Beta-1,4 N-acetylgalactosaminyltransferase 1 OS=Mus musculus OX=10090 GN=B4galnt1 PE=1 SV=1	27.228	true	2	1	0	2.06	59212	34	1	1	1	1	1	1	1	1	1	1		1	1		1		0	0	0	0	1	0	0	0	0	88708.4	171867	176749		452387	118824		477462		88708.4	106659
450938	IMPA1_MOUSE	Impa1	IMPA1_MOUSE		sp|O55023|IMPA1_MOUSE Inositol monophosphatase 1 OS=Mus musculus OX=10090 GN=Impa1 PE=1 SV=1	30.828	true	2	1	0	3.97	30436	16	1	1	1	1	3	3	1		1	1			1		1		0	1	1	0	0	0	0	1	0		916061	778548			625188		1.54271e+06		12446.4	568497
451508	PSA3_MOUSE	Psma3	PSA3_MOUSE		sp|O70435|PSA3_MOUSE Proteasome subunit alpha type-3 OS=Mus musculus OX=10090 GN=Psma3 PE=1 SV=3	240.218	true	2	1	0	16.86	28405	15	5	5	6	6	15	15	6	2	4	5	2	4	5		6	3	1	3	2	1	1	1	0	5	1	3.65669e+06	3787540	4.06305e+06	1.79251e+06	4428555	3652870		21864080	831636	202906	2.25305e+06
450783	SAMH1_MOUSE	Samhd1	SAMH1_MOUSE		sp|Q60710|SAMH1_MOUSE Deoxynucleoside triphosphate triphosphohydrolase SAMHD1 OS=Mus musculus OX=10090 GN=Samhd1 PE=1 SV=3	111.277	true	2	1	0	5.32	75892	41	4	4	4	4	5	5	4	2	4	4	4	4	4	1	4	2	1	0	1	0	3	0	0	0	0	783539	1451417	1.95458e+06	426832	7.22677e+06	3.40469e+06	3208.45	4589230	68502	136772	1.07845e+06
450857	MYG1_MOUSE	Myg1	MYG1_MOUSE		sp|Q9JK81|MYG1_MOUSE MYG1 exonuclease OS=Mus musculus OX=10090 GN=Myg1 PE=1 SV=1	36.903	true	2	1	0	2.63	42723	28	1	1	1	1	1	1	1	1	1								1	0	0	0	0	0	0	0	0	327105	106676								327105	66201.8
451497	KCD12_MOUSE	Kctd12	KCD12_MOUSE	KCTD8_MOUSE	sp|Q6WVG3|KCD12_MOUSE BTB/POZ domain-containing protein KCTD12 OS=Mus musculus OX=10090 GN=Kctd12 PE=1 SV=1	126.806	true	2	1	1	15.6	35892	17	4	4	4	4	7	7	4	1	3	4	2	4	4		4	1	0	0	2	1	2	1	0	0	1	295492	1.00056e+06	1.26524e+06	388569	4291953	3.21566e+06		1.73902e+06	252464	20491.2	818053
450767	RL27_MOUSE	Rpl27	RL27_MOUSE		sp|P61358|RL27_MOUSE 60S ribosomal protein L27 OS=Mus musculus OX=10090 GN=Rpl27 PE=1 SV=2	175.074	true	2	1	0	26.47	15797	6	4	4	5	5	33	33	5	3	3	4	4	5	4	1	4	4	4	2	2	9	6	2	1	3	3	84845096	9343496	16629843	19021928	30229238	64841644	17991174	71165992	12922093	104180968	7.73028e+06
452088	PTN6_MOUSE	Ptpn6	PTN6_MOUSE		sp|P29351|PTN6_MOUSE Tyrosine-protein phosphatase non-receptor type 6 OS=Mus musculus OX=10090 GN=Ptpn6 PE=1 SV=2	364.445	true	2	1	0	20.67	67559	39	11	11	11	11	14	14	11	7	7	10	5	10	8	3	10	5	4	2	3	0	3	0	0	0	2	2.7157e+06	5598320	5438465	1347075	11869444	3.19832e+06	89300.4	10717622	2.37318e+06	2.30765e+06	3379870
451122	EF1G_MOUSE	Eef1g	EF1G_MOUSE		sp|Q9D8N0|EF1G_MOUSE Elongation factor 1-gamma OS=Mus musculus OX=10090 GN=Eef1g PE=1 SV=3	189.604	true	2	1	0	15.33	50061	26	8	8	8	8	19	19	8	7	8	7	2	6	7	2	7	4	2	3	3	0	3	3	0	3	1	5.57287e+06	7.15166e+06	5372182	331977	11886535	4.25924e+06	90104.9	80141584	970186	2.51945e+06	5780696
451055	PRP8_MOUSE	Prpf8	PRP8_MOUSE		sp|Q99PV0|PRP8_MOUSE Pre-mRNA-processing-splicing factor 8 OS=Mus musculus OX=10090 GN=Prpf8 PE=1 SV=2	348.008	true	2	1	0	4.93	273616	148	12	12	12	12	16	16	12	6	7	10	4	11	10	2	7	4	1	1	0	0	6	4	0	2	2	1.44766e+06	1.24187e+06	2.11753e+06	1.69234e+06	6134663	6.20372e+06	9944.23	5.74243e+06	1.37069e+06	1.08308e+06	909388
450813	PRDX5_MOUSE	Prdx5	PRDX5_MOUSE		sp|P99029|PRDX5_MOUSE Peroxiredoxin-5, mitochondrial OS=Mus musculus OX=10090 GN=Prdx5 PE=1 SV=2	199.858	true	2	1	0	35.24	21897	15	5	5	5	5	15	15	5	3	3	4	1	3	3		3	3	1	0	3	1	2	2	0	3	3	2607050	3771127	7.72135e+06	334081	19589476	5313554		21164878	1.54249e+06	1.49171e+06	2.51884e+06
451472	C1TC_MOUSE	Mthfd1	C1TC_MOUSE		sp|Q922D8|C1TC_MOUSE C-1-tetrahydrofolate synthase, cytoplasmic OS=Mus musculus OX=10090 GN=Mthfd1 PE=1 SV=4	137.566	true	2	1	0	4.92	101200	56	5	5	5	5	8	8	4	4	3	4	2	4	4		3	2	0	2	1	0	1	0	0	3	0	612440	758018	612374	290651	1.91485e+06	573683		2.00135e+06	328345	492019	467309
451769	PP2BA_MOUSE	Ppp3ca	PP2BA_MOUSE; PP2BB_MOUSE		sp|P63328|PP2BA_MOUSE Serine/threonine-protein phosphatase 2B catalytic subunit alpha isoform OS=Mus musculus OX=10090 GN=Ppp3ca PE=1 SV=1	41.157	true	2	2	0	2.3	58644	27	1	1	1	1	1	1	1	1	1	1		1			1		0	0	0	0	1	0	0	0	0	183216	280015	104655		706350			864319		183216	173774
451656	TOP1_MOUSE	Top1	TOP1_MOUSE		sp|Q04750|TOP1_MOUSE DNA topoisomerase 1 OS=Mus musculus OX=10090 GN=Top1 PE=1 SV=2	69.151	true	2	1	0	3.26	90876	46	3	3	3	3	5	5	3	3	3	3	2	3	3	1	3	3	0	0	2	0	0	0	0	1	2	2.40559e+06	1.75998e+06	826043	585761	2.46061e+06	1.81055e+06	6894.52	4615425	622122	2.06922e+06	1149427
450592	IF4A1_MOUSE	Eif4a1	IF4A1_MOUSE	IF4A2_MOUSE	sp|P60843|IF4A1_MOUSE Eukaryotic initiation factor 4A-I OS=Mus musculus OX=10090 GN=Eif4a1 PE=1 SV=1	564.087	true	2	1	1	28.57	46153	24	12	9	14	11	32	20	11	5	7	10	4	9	9	1	11	5	0	3	1	1	4	2	0	7	1	4.0524e+06	9899065	9184839	1.08489e+06	28240712	9454660	6377.33	91806248	1.75299e+06	748583	4.1876e+06
452102	VATB2_MOUSE	Atp6v1b2	VATB2_MOUSE		sp|P62814|VATB2_MOUSE V-type proton ATPase subunit B, brain isoform OS=Mus musculus OX=10090 GN=Atp6v1b2 PE=1 SV=1	245.903	true	2	1	0	15.46	56551	29	7	7	8	8	12	12	8	5	7	7	4	8	7		7	5	0	1	0	0	4	0	0	6	1	1.07227e+06	1.91152e+06	2.36587e+06	571194	6587820	1.88252e+06		18173210	1.34149e+06	1.58789e+06	1.26515e+06
451446	IF2A_MOUSE	Eif2s1	IF2A_MOUSE		sp|Q6ZWX6|IF2A_MOUSE Eukaryotic translation initiation factor 2 subunit 1 OS=Mus musculus OX=10090 GN=Eif2s1 PE=1 SV=3	258.196	true	2	1	0	17.46	36108	22	6	6	6	6	11	11	6	3	5	5		5	5		6	1	0	2	1	0	3	1	0	4	0	985029	1.62676e+06	1.05182e+06		3.6452e+06	1.63878e+06		11996731	399696	259464	914211
451300	PERE_MOUSE	Epx	PERE_MOUSE		sp|P49290|PERE_MOUSE Eosinophil peroxidase OS=Mus musculus OX=10090 GN=Epx PE=1 SV=2	165.015	true	2	1	0	7.54	81380	50	6	2	6	2	16	2	2	1	2			2			2		0	2	0	0	0	0	0	0	0	41154888	14494200	11283092	8385635	38987528	27636824	153197	111942752	5013273	14327	2.18746e+06
452083	PPIB_MOUSE	Ppib	PPIB_MOUSE		sp|P24369|PPIB_MOUSE Peptidyl-prolyl cis-trans isomerase B OS=Mus musculus OX=10090 GN=Ppib PE=1 SV=2	281.198	true	2	1	0	29.63	23713	15	7	7	7	7	14	14	7	5	3	7	2	7	6	1	7	3	2	2	2	0	1	0	0	6	1	3028538	3.23756e+06	6.29429e+06	272796	12112578	3.87096e+06	7181.34	27755060	1.86972e+06	3.2352e+06	245176
450690	GNAI2_MOUSE	Gnai2	GNAI2_MOUSE	GNAI1_MOUSE; GNAI3_MOUSE; GNAO_MOUSE; GNAT1_MOUSE; GNAT2_MOUSE; GNAT3_MOUSE	sp|P08752|GNAI2_MOUSE Guanine nucleotide-binding protein G(i) subunit alpha-2 OS=Mus musculus OX=10090 GN=Gnai2 PE=1 SV=5	158.356	true	2	1	6	12.39	40489	20	4	4	5	5	9	9	5	5	3	5	3	4	5	1	5	4	1	0	2	0	5	0	0	1	0	833490	1.11246e+06	1.8949e+06	587938	3.2585e+06	1.70512e+06	2953.7	5.33558e+06	385271	862092	973318
452027	AKIP_MOUSE	Aurkaip1	AKIP_MOUSE		sp|Q9DCJ7|AKIP_MOUSE Aurora kinase A-interacting protein OS=Mus musculus OX=10090 GN=Aurkaip1 PE=2 SV=2	23.093	true	2	1	0	5	23300	10	1	1	1	1	1	1	1	1	1	1	1	1			1	1	1	0	0	0	0	0	0	0	0	680848	390622	1.75523e+06	883920	602851			1.2405e+06	768322	680848	242416
451434	ANKK1_MOUSE	Ankk1	ANKK1_MOUSE; KSYK_MOUSE; ZAP70_MOUSE		sp|Q8BZ25|ANKK1_MOUSE Ankyrin repeat and protein kinase domain-containing protein 1 OS=Mus musculus OX=10090 GN=Ankk1 PE=2 SV=1	10.745	true	2	3	0	1.07	82480	40	1	1	1	1	2	2	1	1	1	1	1	1	1		1	1	0	0	0	0	1	0	0	1	0	104480	511977	364536	166161	1.01049e+06	262035		660108	60086.8	104480	317727
450956	IFIX_MOUSE	Pyhin1	IFIX_MOUSE	IFIXL_MOUSE	sp|Q8BV49|IFIX_MOUSE Pyrin and HIN domain-containing protein 1 OS=Mus musculus OX=10090 GN=Pyhin1 PE=1 SV=1	116.209	true	2	1	1	11.67	46887	20	4	4	4	4	4	4	4		3	4		4	4		4	1	0	0	1	0	2	0	0	1	0		1.75277e+06	1.69011e+06		5.80065e+06	2273357		2.76554e+06	327060	12446.4	1.14361e+06
451864	KI67_MOUSE	Mki67	KI67_MOUSE		sp|E9PVX6|KI67_MOUSE Proliferation marker protein Ki-67 OS=Mus musculus OX=10090 GN=Mki67 PE=1 SV=1	545.25	true	2	1	0	5.89	350864	178	18	18	18	18	33	33	18	12	11	16	8	15	16	3	15	12	5	1	3	4	6	7	0	5	2	5.6796e+06	2.85867e+06	3.26954e+06	2.44309e+06	12773595	6738302	31740.9	9159066	1.80708e+06	5.32574e+06	1.7213e+06
451684	IDE_MOUSE	Ide	IDE_MOUSE		sp|Q9JHR7|IDE_MOUSE Insulin-degrading enzyme OS=Mus musculus OX=10090 GN=Ide PE=1 SV=1	280.875	true	2	1	0	8.64	117772	60	10	10	10	10	12	12	10	4	7	9	4	6	10	3	9	4	2	2	0	0	1	0	0	6	0	2.51925e+06	6.50056e+06	1.98168e+06	800568	2192635	1.71001e+06	26652.9	31726956	241857	497143	4384158
452068	PRS6A_MOUSE	Psmc3	PRS6A_MOUSE		sp|O88685|PRS6A_MOUSE 26S proteasome regulatory subunit 6A OS=Mus musculus OX=10090 GN=Psmc3 PE=1 SV=2	40.053	true	2	1	0	2.26	49549	27	1	1	1	1	2	2	1	1	1	1		1	1		1		0	0	0	0	1	0	0	1	0	262189	294251	243659		941679	123910		2.82856e+06		262189	182609
451906	DHB12_MOUSE	Hsd17b12	DHB12_MOUSE		sp|O70503|DHB12_MOUSE Very-long-chain 3-oxoacyl-CoA reductase OS=Mus musculus OX=10090 GN=Hsd17b12 PE=1 SV=1	25.15	true	2	1	0	2.24	34742	18	1	1	1	1	1	1	1	1	1	1	1	1	1		1	1	0	0	1	0	0	0	0	0	0	19200.2	328544	376926	7140.15	794940	135199		20867.8	223791	19200.2	203891
451728	SCAM2_MOUSE	Scamp2	SCAM2_MOUSE		sp|Q9ERN0|SCAM2_MOUSE Secretory carrier-associated membrane protein 2 OS=Mus musculus OX=10090 GN=Scamp2 PE=1 SV=1	36.622	true	2	1	0	3.65	36465	10	1	1	1	1	2	2	1		1	1		1	1		1		0	0	0	0	2	0	0	0	0		408736	949621		1.34025e+06	205861		718745		12446.4	253657
451611	RL22_MOUSE	Rpl22	RL22_MOUSE		sp|P67984|RL22_MOUSE 60S ribosomal protein L22 OS=Mus musculus OX=10090 GN=Rpl22 PE=1 SV=2	124.102	true	2	1	0	18.75	14759	6	2	2	2	2	8	8	2	2	2	2	1	2	2		2	1	2	0	1	0	2	1	0	1	1	6866511	2.97156e+06	8242468	788980	12446590	6.67169e+06		52459588	978311	4472806	634860
451097	AL9A1_MOUSE	Aldh9a1	AL9A1_MOUSE		sp|Q9JLJ2|AL9A1_MOUSE 4-trimethylaminobutyraldehyde dehydrogenase OS=Mus musculus OX=10090 GN=Aldh9a1 PE=1 SV=1	155.918	true	2	1	0	10.73	53515	29	5	5	5	5	15	15	5	2	4	4	1	4	5	1	5	2	1	2	1	0	5	2	0	3	0	3.29655e+06	3.39206e+06	1.93352e+06	152184	6127624	2075172	13463.1	7.58992e+06	612139	77251	3.04328e+06
451751	RL35_MOUSE	Rpl35	RL35_MOUSE		sp|Q6ZWV7|RL35_MOUSE 60S ribosomal protein L35 OS=Mus musculus OX=10090 GN=Rpl35 PE=1 SV=1	155.596	true	2	1	0	29.27	14553	4	5	5	5	5	16	16	5	3	3	3	5	3	3		2	4	2	2	1	4	1	0	0	1	5	57347172	21641194	39098456	25632488	23124952	8.05702e+06		27713432	9476003	1.73957e+06	2.0345e+06
451474	PLEC_MOUSE	Plec	PLEC_MOUSE	EPIPL_MOUSE	sp|Q9QXS1|PLEC_MOUSE Plectin OS=Mus musculus OX=10090 GN=Plec PE=1 SV=3	1661.63	true	2	1	1	11.04	534181	345	51	51	52	52	98	98	52	29	34	46	22	43	43	5	49	30	13	12	9	2	19	12	0	30	1	40503460	60492316	24492534	11118667	51102012	14071824	429631	79436432	4.1597e+06	16878170	21868274
451001	HSP7C_MOUSE	Hspa8	HSP7C_MOUSE	HSP72_MOUSE	sp|P63017|HSP7C_MOUSE Heat shock cognate 71 kDa protein OS=Mus musculus OX=10090 GN=Hspa8 PE=1 SV=1	932.795	true	2	1	1	34.37	70871	37	22	16	25	19	82	42	19	11	12	15	6	14	14	4	13	9	1	9	6	2	5	1	2	11	5	24122042	49714940	40978736	14762502	100780984	32906452	4.17281e+06	260011824	25475796	13801139	32614900
451020	TGM1_MOUSE	Tgm1	TGM1_MOUSE		sp|Q9JLF6|TGM1_MOUSE Protein-glutamine gamma-glutamyltransferase K OS=Mus musculus OX=10090 GN=Tgm1 PE=1 SV=2	293.617	true	2	1	0	10.31	89826	48	8	8	8	8	19	19	8	6	5	6	5	5	7	2	6	3	5	2	2	1	1	4	0	4	0	13247804	13478644	3959230	6.86096e+06	4335248	5112241	160353	51332384	1.30855e+06	12789354	7222486
451687	RS8_MOUSE	Rps8	RS8_MOUSE		sp|P62242|RS8_MOUSE 40S ribosomal protein S8 OS=Mus musculus OX=10090 GN=Rps8 PE=1 SV=2	335.739	true	2	1	0	38.46	24205	11	9	9	9	9	36	36	9	9	6	7	5	7	7	4	7	4	7	2	1	5	2	5	3	4	6	83706848	15598595	29330238	23484724	40802896	41954188	13725563	47281616	19651462	204042240	8491778
451977	FUMH_MOUSE	Fh	FUMH_MOUSE		sp|P97807|FUMH_MOUSE Fumarate hydratase, mitochondrial OS=Mus musculus OX=10090 GN=Fh PE=1 SV=3	48.574	true	2	1	0	6.71	54357	32	3	3	3	3	3	3	3	2	3	2	1	3	2		2		0	0	0	0	2	0	0	1	0	182576	814474	658745	150756	2888750	803206		3.5212e+06		73888.7	564832
451646	RPN2_MOUSE	Rpn2	RPN2_MOUSE		sp|Q9DBG6|RPN2_MOUSE Dolichyl-diphosphooligosaccharide--protein glycosyltransferase subunit 2 OS=Mus musculus OX=10090 GN=Rpn2 PE=1 SV=1	163.73	true	2	1	0	8.24	69063	27	4	4	4	4	7	7	3	1	3	3		3	3		3	1	1	0	0	0	2	0	0	3	0	199356	1.43652e+06	1.45404e+06		2.97178e+06	1.00628e+06		4654797	103371	9827.19	1.087e+06
452151	RAD21_MOUSE	Rad21	RAD21_MOUSE		sp|Q61550|RAD21_MOUSE Double-strand-break repair protein rad21 homolog OS=Mus musculus OX=10090 GN=Rad21 PE=1 SV=3	21.995	true	2	1	0	1.1	72082	26	1	1	1	1	1	1	1	1	1	1	1	1	1		1	1	0	1	0	0	0	0	0	0	0	154645	336704	300570	100237	712593	117596		338344	84943.4	154645	208954
451196	ALDOA_MOUSE	Aldoa	ALDOA_MOUSE	ALDOB_MOUSE	sp|P05064|ALDOA_MOUSE Fructose-bisphosphate aldolase A OS=Mus musculus OX=10090 GN=Aldoa PE=1 SV=2	578.875	true	2	1	1	32.42	39356	24	12	11	13	12	36	33	12	11	9	9	5	10	9	2	11	7	5	3	1	4	2	3	1	10	4	23683044	24373270	17856948	8864061	53758984	15191910	994543	250718880	9196844	38945444	15502105
450498	ACTG_MOUSE	Actg1	ACTG_MOUSE	ACTBL_MOUSE; ACTB_MOUSE	sp|P63260|ACTG_MOUSE Actin, cytoplasmic 2 OS=Mus musculus OX=10090 GN=Actg1 PE=1 SV=1	1267.27	true	2	1	2	45.33	41792	23	19	7	26	9	258	79	9	7	6	6	6	6	9	3	7	5	6	6	6	12	10	8	2	18	11	402392288	311785024	457995456	223644032	862033728	243783040	75047344	1728689280	145557120	122238256	113087536
451095	ENOA_MOUSE	Eno1	ENOA_MOUSE	ENOG_MOUSE	sp|P17182|ENOA_MOUSE Alpha-enolase OS=Mus musculus OX=10090 GN=Eno1 PE=1 SV=3	655.544	true	2	1	1	36.41	47141	28	16	15	17	16	37	34	16	8	12	13	5	12	13		13	9	2	4	6	0	4	3	0	10	5	3813983	16978934	24463794	373529	20869984	21197420		185387968	9842434	1.08564e+06	13937717
450757	UGDH_MOUSE	Ugdh	UGDH_MOUSE		sp|O70475|UGDH_MOUSE UDP-glucose 6-dehydrogenase OS=Mus musculus OX=10090 GN=Ugdh PE=1 SV=1	51.978	true	2	1	0	2.03	54832	34	1	1	1	1	2	2	1	1	1	1		1	1		1		0	0	0	0	1	0	0	1	0	142522	143336	129982		209876	49380.5		361224		142522	88952.7
451608	PPIA_MOUSE	Ppia	PPIA_MOUSE		sp|P17742|PPIA_MOUSE Peptidyl-prolyl cis-trans isomerase A OS=Mus musculus OX=10090 GN=Ppia PE=1 SV=2	308.119	true	2	1	0	40.24	17971	14	7	7	9	9	19	19	8	7	7	8	3	7	8	1	8	5	2	0	2	1	3	3	0	5	2	8072243	32525254	27128428	1.93088e+06	82390904	21900704	71328.7	117670096	4649963	12595705	18708172
451737	CNOT1_MOUSE	Cnot1	CNOT1_MOUSE		sp|Q6ZQ08|CNOT1_MOUSE CCR4-NOT transcription complex subunit 1 OS=Mus musculus OX=10090 GN=Cnot1 PE=1 SV=2	12.509	true	2	1	0	0.29	266808	136	1	1	1	1	1	1	1	1	1	1		1			1		0	0	0	0	1	0	0	0	0	298442	426867	42964.2		225626			735546		298442	264909
451712	CATD_MOUSE	Ctsd	CATD_MOUSE		sp|P18242|CATD_MOUSE Cathepsin D OS=Mus musculus OX=10090 GN=Ctsd PE=1 SV=1	39.828	true	2	1	0	2.44	44954	20	1	1	1	1	1	1	1		1	1		1	1		1		0	1	0	0	0	0	0	0	0		745408	1.08456e+06		1.89217e+06	397587		1.32446e+06		12446.4	462591
451064	CPT1A_MOUSE	Cpt1a	CPT1A_MOUSE		sp|P97742|CPT1A_MOUSE Carnitine O-palmitoyltransferase 1, liver isoform OS=Mus musculus OX=10090 GN=Cpt1a PE=1 SV=4	22.55	true	2	1	0	1.29	88251	44	1	1	1	1	1	1	1	1	1	1		1	1		1		0	0	1	0	0	0	0	0	0	74040.2	103224	183842		68623.9	99318.4		184344		74040.2	64059.5
451926	RS19_MOUSE	Rps19	RS19_MOUSE		sp|Q9CZX8|RS19_MOUSE 40S ribosomal protein S19 OS=Mus musculus OX=10090 GN=Rps19 PE=1 SV=3	230.384	true	2	1	0	33.79	16085	12	6	6	6	6	18	18	6	2	3	4	1	5	4		5	1	1	2	2	1	5	2	0	5	0	1.75711e+06	2237052	7299874	1.07606e+06	10672488	4.44874e+06		8678154	1.10781e+06	42931.7	318214
451453	PHB2_MOUSE	Phb2	PHB2_MOUSE		sp|O35129|PHB2_MOUSE Prohibitin-2 OS=Mus musculus OX=10090 GN=Phb2 PE=1 SV=1	197.831	true	2	1	0	12.71	33296	26	4	4	4	4	14	14	4	2	3	4		4	3		4	2	1	2	3	0	2	1	0	4	1	1.26252e+06	1.78998e+06	2.45712e+06		4840302	1804117		13445866	722145	282213	1.74666e+06
451776	HCLS1_MOUSE	Hcls1	HCLS1_MOUSE		sp|P49710|HCLS1_MOUSE Hematopoietic lineage cell-specific protein OS=Mus musculus OX=10090 GN=Hcls1 PE=1 SV=2	23.694	true	2	1	0	1.65	54240	20	1	1	1	1	1	1	1	1	1	1	1	1	1		1	1	0	0	0	0	1	0	0	0	0	95859.8	116819	252374	58814.8	651115	176746		101697	46861.5	95859.8	72496.6
451693	CTNA1_MOUSE	Ctnna1	CTNA1_MOUSE		sp|P26231|CTNA1_MOUSE Catenin alpha-1 OS=Mus musculus OX=10090 GN=Ctnna1 PE=1 SV=1	24.123	true	2	1	0	0.77	100105	55	1	1	1	1	1	1	1		1	1		1	1		1		0	1	0	0	0	0	0	0	0		393882	189051		243924	142070		116453		12446.4	244439
450909	CLIC1_MOUSE	Clic1	CLIC1_MOUSE		sp|Q9Z1Q5|CLIC1_MOUSE Chloride intracellular channel protein 1 OS=Mus musculus OX=10090 GN=Clic1 PE=1 SV=3	201.462	true	2	1	0	37.34	27013	17	6	6	6	6	12	12	6	3	5	6	3	6	5	1	5	3	0	2	2	0	4	1	0	3	0	3562506	5071245	6.1605e+06	774123	15374715	3753324	12309.5	49811680	1.81996e+06	1.64905e+06	3.19634e+06
451617	ETFA_MOUSE	Etfa	ETFA_MOUSE		sp|Q99LC5|ETFA_MOUSE Electron transfer flavoprotein subunit alpha, mitochondrial OS=Mus musculus OX=10090 GN=Etfa PE=1 SV=2	25.531	true	2	1	0	3	35009	23	1	1	1	1	1	1	1	1	1	1		1	1		1	1	0	1	0	0	0	0	0	0	0	25023.7	504553	24742.3		1.33526e+06	160256		55582.8	9204.86	25023.7	313120
450591	GANAB_MOUSE	Ganab	GANAB_MOUSE		sp|Q8BHN3|GANAB_MOUSE Neutral alpha-glucosidase AB OS=Mus musculus OX=10090 GN=Ganab PE=1 SV=1	183.936	true	2	1	0	6.14	106911	57	7	7	7	7	10	10	7	3	5	5	3	7	6		5	4	1	0	1	0	5	0	0	3	0	633980	2.0651e+06	1.73872e+06	320098	5687917	937105		4383914	2.08162e+06	211222	2.23469e+06
450701	PSB4_MOUSE	Psmb4	PSB4_MOUSE		sp|P99026|PSB4_MOUSE Proteasome subunit beta type-4 OS=Mus musculus OX=10090 GN=Psmb4 PE=1 SV=1	55.318	true	2	1	0	9.09	29116	11	2	2	2	2	2	2	2	2	2	2	2	2	2	1	2	2	1	0	0	0	0	0	0	1	0	2.01999e+06	7409458	1.77057e+06	612324	6600824	7.3448e+06	7146.09	8700366	440787	1.63292e+06	3701796
451780	IF2B_MOUSE	Eif2s2	IF2B_MOUSE		sp|Q99L45|IF2B_MOUSE Eukaryotic translation initiation factor 2 subunit 2 OS=Mus musculus OX=10090 GN=Eif2s2 PE=1 SV=1	63.527	true	2	1	0	5.14	38092	22	2	2	2	2	5	5	2	2	2	2	2	2	2		2	2	0	0	1	1	1	1	0	0	1	3.19546e+06	3.82891e+06	968216	604904	2540003	689692		29984900	409429	2.06789e+06	2.21336e+06
451771	PABP1_MOUSE	Pabpc1	PABP1_MOUSE		sp|P29341|PABP1_MOUSE Polyadenylate-binding protein 1 OS=Mus musculus OX=10090 GN=Pabpc1 PE=1 SV=2	744.271	true	2	1	0	23.9	70671	43	18	18	19	19	55	55	19	14	13	16	14	16	19	1	18	8	9	1	3	8	9	10	0	9	5	31333166	6774250	6.21609e+06	17120458	108495768	79246504	243875	140712048	15530741	38244400	3.42911e+06
450579	PSB7_MOUSE	Psmb7	PSB7_MOUSE		sp|P70195|PSB7_MOUSE Proteasome subunit beta type-7 OS=Mus musculus OX=10090 GN=Psmb7 PE=1 SV=1	65.95	true	2	1	0	10.83	29891	12	3	3	3	3	5	5	3	2	3	3	2	3	2		3	2	1	0	0	0	1	0	0	2	1	1.69157e+06	1527034	1685938	3.12007e+06	3.27713e+06	4.02675e+06		13755088	1.04419e+06	2.26005e+06	1.38555e+06
451283	RAB32_MOUSE	Rab32	RAB32_MOUSE		sp|Q9CZE3|RAB32_MOUSE Ras-related protein Rab-32 OS=Mus musculus OX=10090 GN=Rab32 PE=1 SV=3	105.909	true	2	1	0	13	25068	16	3	2	3	2	6	5	2	2	1	1	2	1	1		1	1	1	0	1	1	1	0	0	1	0	543357	461003	1.03114e+06	322634	1446683	565337		1.08878e+06	72180.7	435812	118084
450569	KRT35_MOUSE	Krt35	KRT35_MOUSE	K1H2_MOUSE	sp|Q497I4|KRT35_MOUSE Keratin, type I cuticular Ha5 OS=Mus musculus OX=10090 GN=Krt35 PE=1 SV=1	58.212	true	2	1	1	3.08	50530	32	2	1	2	1	54	11	1	1	1	1	1	1	1	1	1	1	1	1	1	2	1	1	0	1	3	2720436992	2452806912	938575744	839559616	58351000	669078272	342563424	2505210880	306079424	31490690	2.80326e+06
451531	ITB1_MOUSE	Itgb1	ITB1_MOUSE		sp|P09055|ITB1_MOUSE Integrin beta-1 OS=Mus musculus OX=10090 GN=Itgb1 PE=1 SV=1	52.881	true	2	1	0	1.13	88231	39	1	1	1	1	3	3	1	1	1	1	1	1	1		1		0	0	1	0	0	1	0	1	0	64596.8	278531	272064	30089.1	583150	191820		571872		64596.8	172853
450663	ITB6_MOUSE	Itgb6	ITB6_MOUSE		sp|Q9Z0T9|ITB6_MOUSE Integrin beta-6 OS=Mus musculus OX=10090 GN=Itgb6 PE=1 SV=1	52.881	true	2	1	0	1.14	86042	40	1	1	1	1	3	3	1	1	1	1	1	1	1		1		0	0	1	0	0	1	0	1	0	64596.8	278531	272064	30089.1	583150	191820		571872		64596.8	172853
452014	ANM5_MOUSE	Prmt5	ANM5_MOUSE		sp|Q8CIG8|ANM5_MOUSE Protein arginine N-methyltransferase 5 OS=Mus musculus OX=10090 GN=Prmt5 PE=1 SV=3	31.587	true	2	1	0	1.57	72680	41	1	1	1	1	1	1	1	1	1	1		1	1		1		0	0	0	0	0	0	0	1	0	282663	290250	178062		500700	190790		1.70566e+06		282663	180126
450844	RS3_MOUSE	Rps3	RS3_MOUSE		sp|P62908|RS3_MOUSE 40S ribosomal protein S3 OS=Mus musculus OX=10090 GN=Rps3 PE=1 SV=1	417.65	true	2	1	0	51.03	26674	19	11	11	11	11	32	32	11	9	7	7	5	9	8	1	11	6	3	3	4	2	4	1	0	9	6	9705791	10804083	9519798	1.74714e+06	22376732	8.17602e+06	3908.33	66262488	3.54052e+06	9655477	5.54093e+06
451005	BIP_MOUSE	Hspa5	BIP_MOUSE		sp|P20029|BIP_MOUSE Endoplasmic reticulum chaperone BiP OS=Mus musculus OX=10090 GN=Hspa5 PE=1 SV=3	805.679	true	2	1	0	34.81	72422	38	19	17	20	18	53	40	18	11	13	16	8	16	11	2	17	8	4	5	3	2	5	3	2	12	4	24043142	28158170	25514608	12942754	63978228	24562688	2691490	196382720	16559306	11790644	15588146
451223	PO210_MOUSE	Nup210	PO210_MOUSE		sp|Q9QY81|PO210_MOUSE Nuclear pore membrane glycoprotein 210 OS=Mus musculus OX=10090 GN=Nup210 PE=1 SV=2	80.366	true	2	1	0	2.01	204101	80	4	4	4	4	4	4	4	3	3	3	1	3	3		4	2	0	0	1	0	2	1	0	0	0	269897	743965	831243	2371213	1.87042e+06	592477		1.98841e+06	350797	513483	899182
451346	ITAL_MOUSE	Itgal	ITAL_MOUSE		sp|P24063|ITAL_MOUSE Integrin alpha-L OS=Mus musculus OX=10090 GN=Itgal PE=1 SV=2	138.133	true	2	1	0	4.04	128328	67	5	5	5	5	6	6	4	3	3	4	2	4	1		4	3	0	0	1	0	2	0	0	2	0	201761	330209	577325	124766	1.96483e+06	143360		1.3402e+06	70747.5	279293	275976
451227	RNH2B_MOUSE	Rnaseh2b	RNH2B_MOUSE		sp|Q80ZV0|RNH2B_MOUSE Ribonuclease H2 subunit B OS=Mus musculus OX=10090 GN=Rnaseh2b PE=1 SV=2	43.183	true	2	1	0	2.92	34729	17	1	1	1	1	1	1	1	1	1	1	1	1	1		1		0	0	0	0	1	0	0	0	0	91620.8	147635	161200	420320	389970	149037		246447		91620.8	91620.8
450808	FLNB_MOUSE	Flnb	FLNB_MOUSE		sp|Q80X90|FLNB_MOUSE Filamin-B OS=Mus musculus OX=10090 GN=Flnb PE=1 SV=3	405.055	true	2	1	0	4.88	277825	155	13	6	13	6	21	10	6	3	3	5	4	6	5	1	6	1	2	1	1	0	0	1	0	5	0	3.04148e+06	11491376	5437079	1225100	24670176	5684277	257184	28401158	2.24617e+06	1.00049e+06	813570
450625	DDX3X_MOUSE	Ddx3x	DDX3X_MOUSE	DDX3L_MOUSE; DDX4_MOUSE	sp|Q62167|DDX3X_MOUSE ATP-dependent RNA helicase DDX3X OS=Mus musculus OX=10090 GN=Ddx3x PE=1 SV=3	202.072	true	2	1	2	10.73	73101	41	7	2	8	2	10	2	2	2	2	2		2	1		2		0	0	0	0	0	1	0	1	0	2145917	2.2208e+06	1.75601e+06	934144	3.36449e+06	2247642	6510.51	16691732	807827	303045	140519
450948	ZDBF2_MOUSE	Zdbf2	ZDBF2_MOUSE		sp|Q5SS00|ZDBF2_MOUSE DBF4-type zinc finger-containing protein 2 homolog OS=Mus musculus OX=10090 GN=Zdbf2 PE=2 SV=1	1.09	true	2	1	0	0.28	273744	127	1	1	1	1	1	1	1	1	1	1	1	1	1	1	1	1	0	0	0	0	0	0	1	0	0	126479	3.22484e+06	1.02597e+06	107214	1.02709e+06	59722.9	20319	678236	169707	126479	2.0013e+06
451806	DHX15_MOUSE	Dhx15	DHX15_MOUSE		sp|O35286|DHX15_MOUSE Pre-mRNA-splicing factor ATP-dependent RNA helicase DHX15 OS=Mus musculus OX=10090 GN=Dhx15 PE=1 SV=2	288.44	true	2	1	0	9.94	91007	46	8	8	8	8	13	13	8	5	5	7	2	6	8	1	8	3	1	0	1	0	4	3	0	4	0	1.67394e+06	1.62258e+06	1.81225e+06	509457	7731376	3.60102e+06	4187.49	10487450	194242	1504166	550276
451539	UBE2N_MOUSE	Ube2n	UBE2N_MOUSE		sp|P61089|UBE2N_MOUSE Ubiquitin-conjugating enzyme E2 N OS=Mus musculus OX=10090 GN=Ube2n PE=1 SV=1	115.441	true	2	1	0	24.34	17137	11	4	4	4	4	6	6	4	2	4	4	1	3	2		4	1	2	0	0	0	1	0	0	3	0	1.54919e+06	1.50373e+06	1.2797e+06	9748.02	3658378	919601		12441348	331294	272151	997978
451843	RL23_MOUSE	Rpl23	RL23_MOUSE		sp|P62830|RL23_MOUSE 60S ribosomal protein L23 OS=Mus musculus OX=10090 GN=Rpl23 PE=1 SV=1	85.458	true	2	1	0	18.57	14865	9	3	3	3	3	8	8	3	2	3	3	3	3	3	1	3	3	1	0	1	0	1	2	1	2	0	2.29548e+06	3.33716e+06	5.27493e+06	129711	4904559	5.06e+06	539274	14991547	2.45479e+06	5421757	1.7645e+06
451909	RTN1_MOUSE	Rtn1	RTN1_MOUSE		sp|Q8K0T0|RTN1_MOUSE Reticulon-1 OS=Mus musculus OX=10090 GN=Rtn1 PE=1 SV=1	24.451	true	2	1	0	1.03	83572	33	1	1	1	1	2	2	1	1	1	1	1	1		1	1		1	0	0	1	0	0	0	0	0	2.07115e+06	34137.3	15774.5	1.16733e+06	42075.5		6085.2	75327.3		2.07115e+06	21185.2
451339	RHOA_MOUSE	Rhoa	RHOA_MOUSE; RHOC_MOUSE	RHOB_MOUSE	sp|Q9QUI0|RHOA_MOUSE Transforming protein RhoA OS=Mus musculus OX=10090 GN=Rhoa PE=1 SV=1	75.568	true	2	2	1	12.95	21782	12	2	2	2	2	5	5	2	1	2	2	1	2	1		1	1	0	0	0	0	4	0	0	1	0	230346	806816	789505	321921	1.77294e+06	256909		1.12966e+06	187216	68599.1	626147
450587	6PGD_MOUSE	Pgd	6PGD_MOUSE		sp|Q9DCD0|6PGD_MOUSE 6-phosphogluconate dehydrogenase, decarboxylating OS=Mus musculus OX=10090 GN=Pgd PE=1 SV=3	477.375	true	2	1	0	25.05	53247	31	10	10	11	11	32	32	11	8	8	10	4	11	11	2	11	6	2	3	2	3	8	2	1	8	3	6124575	14154438	13349721	2.06472e+06	32811066	12019261	177196	99509536	3789890	7145427	6.51407e+06
452156	LSP1_MOUSE	Lsp1	LSP1_MOUSE		sp|P19973|LSP1_MOUSE Lymphocyte-specific protein 1 OS=Mus musculus OX=10090 GN=Lsp1 PE=1 SV=2	152.876	true	2	1	0	20.3	36714	22	4	4	4	4	8	8	4	2	3	3	1	4	4	1	4	1	0	2	1	0	2	1	0	2	0	564020	4920236	1199251	322149	4968232	1.21273e+06	20257.5	2.6353e+06	408847	107851	2.39413e+06
450748	LAP2A_MOUSE	Tmpo	LAP2A_MOUSE		sp|Q61033|LAP2A_MOUSE Lamina-associated polypeptide 2, isoforms alpha/zeta OS=Mus musculus OX=10090 GN=Tmpo PE=1 SV=4	186.64	true	2	1	0	9.24	75168	42	4	1	4	1	7	1	1	1	1	1		1	1		1		0	0	0	0	1	0	0	0	0	1.27147e+06	2.16795e+06	2.67467e+06		6095664	726223		1.78219e+06		130087	56739.6
451069	ATPK_MOUSE	Atp5mf	ATPK_MOUSE		sp|P56135|ATPK_MOUSE ATP synthase subunit f, mitochondrial OS=Mus musculus OX=10090 GN=Atp5mf PE=1 SV=3	26.019	true	2	1	0	13.64	10344	4	1	1	1	1	1	1	1	1	1	1		1	1		1	1	0	0	1	0	0	0	0	0	0	328441	640467	823939		401850	353276		750956	318667	328441	397466
451224	SPT5H_MOUSE	Supt5h	SPT5H_MOUSE		sp|O55201|SPT5H_MOUSE Transcription elongation factor SPT5 OS=Mus musculus OX=10090 GN=Supt5h PE=1 SV=1	13.728	true	2	1	0	0.74	120664	58	1	1	1	1	1	1	1	1	1	1		1	1		1		0	0	0	0	1	0	0	0	0	92693.9	135367	220770		446570	100033		289831		92693.9	84007.1
451805	KISHA_MOUSE	Tmem167a	KISHA_MOUSE		sp|Q9CR64|KISHA_MOUSE Protein kish-A OS=Mus musculus OX=10090 GN=Tmem167a PE=1 SV=1	27.893	true	2	1	0	12.5	8074	4	1	1	1	1	3	3	1	1	1	1		1	1		1		0	0	0	0	1	0	0	2	0	506754	348551	163500		543502	314412		3021180		506754	216307
451058	CARD9_MOUSE	Card9	CARD9_MOUSE		sp|A2AIV8|CARD9_MOUSE Caspase recruitment domain-containing protein 9 OS=Mus musculus OX=10090 GN=Card9 PE=1 SV=1	26.865	true	2	1	0	1.68	62462	36	1	1	1	1	1	1	1	1	1	1		1	1		1		0	0	1	0	0	0	0	0	0	130022	130274	119146		401221	96532.2		207471		130022	80846.4
452112	CSF2R_MOUSE	Csf2ra	CSF2R_MOUSE		sp|Q00941|CSF2R_MOUSE Granulocyte-macrophage colony-stimulating factor receptor subunit alpha OS=Mus musculus OX=10090 GN=Csf2ra PE=2 SV=2	22.423	true	2	1	0	2.32	41768	19	1	1	1	1	1	1	1	1	1	1		1	1		1		0	0	1	0	0	0	0	0	0	531620	65229.1	120886		400646	71759.2		427104		531620	40480.4
450969	ITB2_MOUSE	Itgb2	ITB2_MOUSE	ITB7_MOUSE	sp|P11835|ITB2_MOUSE Integrin beta-2 OS=Mus musculus OX=10090 GN=Itgb2 PE=1 SV=2	110.774	true	2	1	1	3.37	85026	52	3	3	4	4	11	11	4	2	4	3	1	4	3		3	2	1	2	1	0	3	2	0	1	1	994078	2.68984e+06	2259358	4747.49	5.01591e+06	1.73959e+06		2697274	913531	129190	1.92621e+06
451036	DPP3_MOUSE	Dpp3	DPP3_MOUSE		sp|Q99KK7|DPP3_MOUSE Dipeptidyl peptidase 3 OS=Mus musculus OX=10090 GN=Dpp3 PE=1 SV=2	146.969	true	2	1	0	5.83	82898	44	4	4	4	4	6	6	4	2	4	4	2	4	4		4	1	0	2	1	0	1	0	0	2	0	373827	1.50124e+06	917366	351156	1.58286e+06	921064		5634830	24704.3	67751.8	1.0842e+06
[truncated: 345 more rows]
[truncated: 28 more columns]
