# Supplementary material for: ST8SIA4-mediated polysialylation is critical for CCR2-driven monocyte egress from the bone marrow
Source: bioRxiv preprint, doi:10.64898/2026.01.09.698551, version 1 (2026-01-12)
Supplement: Table S4 [file 698551_file06.xlsx]

## Sheet: report.pg_matrix
Protein.Group	Protein.Names	Genes	First.Protein.Description	KO1_9994.d	KO2_9995.d	KO3_9996.d	KO4_9997.d	WT1_9988.d	WT2_9989.d	WT3_9990.d	WT4_9991.d	log2 KO1_9994.d	log2 KO2_9995.d	log2 KO3_9996.d	log2 KO4_9997.d	log2 WT1_9988.d	log2 WT2_9989.d	log2 WT3_9990.d	log2 WT4_9991.d	RVM Log2 KO1_9994.d	RVM Log2 KO2_9995.d	RVM Log2 KO3_9996.d	RVM Log2 KO4_9997.d	RVM Log2 WT1_9988.d	RVM Log2 WT2_9989.d	RVM Log2 WT3_9990.d	RVM Log2 WT4_9991.d	Genes	Log2 FC (WT/KO)	p-val	-log10(p-val)	nb val WT	nb val KO	test nb val	Treshold
Q9Z0T9	ITB6_MOUSE	Itgb6	Integrin beta-6					58337.1	73557.9	46057	19488.9					15.8321	16.1666	15.4911	14.2504	12.2035	12.1943	12.2707	12.2163	15.8321	16.1666	15.4911	14.2504	Itgb6	3.21383	0.000255541	3.59254	4	0	1	1
Q64692	SIA8D_MOUSE	St8sia4	CMP-N-acetylneuraminate-poly-alpha-2,8-sialyltransferase					35877	45951.7	53938.8	41162.7					15.1308	15.4878	15.719	15.329	12.2035	12.1943	12.2707	12.2163	15.1308	15.4878	15.719	15.329	St8sia4	3.19545	2.43386e-07	6.6137	4	0	1	1
A0A1B0GRP9;E9PY43	A0A1B0GRP9_MOUSE;E9PY43_MOUSE	Erich1	Glutamate rich 1 (Fragment)					32746.1	29925.3	27922.5	40731.2					14.999	14.8691	14.7691	15.3138	12.2035	12.1943	12.2707	12.2163	14.999	14.8691	14.7691	15.3138	Erich1	2.76655	4.29399e-07	6.36714	4	0	1	1
Q61390	TCPW_MOUSE	Cct6b	T-complex protein 1 subunit zeta-2	42945.3				54400.8	61869.1	35893.1	66684.4	15.3902				15.7313	15.9169	15.1314	16.0251	15.3902	12.1943	12.2707	12.2163	15.7313	15.9169	15.1314	16.0251	Cct6b	2.68329	0.016621	1.77934	4	1	1	1
Q61036	PAK3_MOUSE	Pak3	Serine/threonine-protein kinase PAK 3	2295		3256.01		63115	13498.1	42713.8		11.1643		11.6689		15.9457	13.7205	15.3824		11.1643	12.1943	11.6689	12.2163	15.9457	13.7205	15.3824	12.3248	Pak3	2.5324	0.0257028	1.59002	3	2	1	1
P97430	SLPI_MOUSE	Slpi	Antileukoproteinase	21055.1	4278.85		8726.47	32468.2	36270.2	34994.8	45285.8	14.3619	12.063		13.0912	14.9867	15.1465	15.0949	15.4668	14.3619	12.063	12.2707	13.0912	14.9867	15.1465	15.0949	15.4668	Slpi	2.22701	0.00574635	2.24061	4	3	1	1
Q4KWH5	PLCH1_MOUSE	Plch1	1-phosphatidylinositol 4,5-bisphosphate phosphodiesterase eta-1	19695.9				23975.4	28561.7	28729.9	30324.2	14.2656				14.5493	14.8018	14.8103	14.8882	14.2656	12.1943	12.2707	12.2163	14.5493	14.8018	14.8103	14.8882	Plch1	2.02563	0.00769499	2.11379	4	1	1	1
Q9JKL5	CHP3_MOUSE	Tesc	Calcineurin B homologous protein 3	3706.57	2547.2			12053.8	11040.6	13226.1	32282.8	11.8559	11.3147			13.5572	13.4305	13.6911	14.9785	11.8559	11.3147	12.2707	12.2163	13.5572	13.4305	13.6911	14.9785	Tesc	1.99992	0.00315067	2.5016	4	2	1	1
Q9EQI5	Q9EQI5_MOUSE	Ppbp	Chemokine subfamily B Cys-X-Cys	190342	48435.7	106685	59230.1	260417	328851	325861	356838	17.5382	15.5638	16.703	15.854	17.9905	18.3271	18.3139	18.4449	17.5382	15.5638	16.703	15.854	17.9905	18.3271	18.3139	18.4449	Ppbp	1.85432	0.00661723	2.17932	4	4	1	1
Q3ULW8	PARP3_MOUSE	Parp3	Protein mono-ADP-ribosyltransferase PARP3	91822.5	68836.3	71461.4	58831	254047	233082	262587	242644	16.4866	16.0709	16.1249	15.8443	17.9547	17.8305	18.0024	17.8885	16.4866	16.0709	16.1249	15.8443	17.9547	17.8305	18.0024	17.8885	Parp3	1.78738	1.31631e-05	4.88064	4	4	1	1
Q9DCG2	CD302_MOUSE	Cd302	CD302 antigen					29708.9	25569.4	18708.6						14.8586	14.6421	14.1914		12.2035	12.1943	12.2707	12.2163	14.8586	14.6421	14.1914	12.3248	Cd302	1.78302	0.0213906	1.66978	3	0	1	1
P15508	SPTB1_MOUSE	Sptb	Spectrin beta chain, erythrocytic	15962.9		21151.9		24572.1	23679.8	47306.5	37109.4	13.9624		14.3685		14.5847	14.5314	15.5298	15.1795	13.9624	12.1943	14.3685	12.2163	14.5847	14.5314	15.5298	15.1795	Sptb	1.77094	0.0290492	1.53687	4	2	1	1
Q9R257	HEBP1_MOUSE	Hebp1	Heme-binding protein 1	18993.2	20115.2	16965.9	20623.6	45742.1	61763.8	75031.9	82681.1	14.2132	14.296	14.0504	14.332	15.4812	15.9145	16.1952	16.3353	14.2132	14.296	14.0504	14.332	15.4812	15.9145	16.1952	16.3353	Hebp1	1.75866	0.000114921	3.9396	4	4	1	1
Q9D8C6	MED11_MOUSE	Med11	Mediator of RNA polymerase II transcription subunit 11	12836				21742.4	20646.5	18748.5	20805.9	13.6479				14.4082	14.3336	14.1945	14.3447	13.6479	12.1943	12.2707	12.2163	14.4082	14.3336	14.1945	14.3447	Med11	1.73793	0.00285405	2.54454	4	1	1	1
Q8K2P7	S38A1_MOUSE	Slc38a1	Sodium-coupled neutral amino acid symporter 1	16570.3		7618.19		23700.7	25181.5	21266.6	19115.1	14.0163		12.8952		14.5326	14.6201	14.3763	14.2224	14.0163	12.1943	12.8952	12.2163	14.5326	14.6201	14.3763	14.2224	Slc38a1	1.60731	0.0102858	1.98776	4	2	1	1
D3Z7I2;F6X2K7;F7C0E4	D3Z7I2_MOUSE;F6X2K7_MOUSE;F7C0E4_MOUSE	Atxn7l1	Ataxin 7-like 1	15887	10976			27826.7	29473.8	22821.1	17532.5	13.9556	13.4221			14.7642	14.8471	14.4781	14.0977	13.9556	13.4221	12.2707	12.2163	14.7642	14.8471	14.4781	14.0977	Atxn7l1	1.58062	0.0142979	1.84473	4	2	1	1
E9QN99	E9QN99_MOUSE	Abhd14b	Putative protein-lysine deacylase ABHD14B	11501.3	11009.8	12083.9	9991.41	29892.5	26708.5	39112.7	37387.7	13.4895	13.4265	13.5608	13.2865	14.8675	14.705	15.2553	15.1903	13.4895	13.4265	13.5608	13.2865	14.8675	14.705	15.2553	15.1903	Abhd14b	1.56371	3.52502e-05	4.45284	4	4	1	1
H3BLD2	H3BLD2_MOUSE	Cdhr4	Cadherin-related family member 4 (Fragment)		15461.5	22171.2		24309.6	32736.7	23984.5	27770		13.9164	14.4364		14.5692	14.9986	14.5498	14.7612	12.2035	13.9164	14.4364	12.2163	14.5692	14.9986	14.5498	14.7612	Cdhr4	1.52657	0.0406023	1.39145	4	2	1	1
P35979	RL12_MOUSE	Rpl12	Large ribosomal subunit protein uL11	636615	564233	548654	747901	2543660	2293000	2647550	585355	19.2801	19.1059	19.0655	19.5125	21.2785	21.1288	21.3362	19.159	19.2801	19.1059	19.0655	19.5125	21.2785	21.1288	21.3362	19.159	Rpl12	1.48461	0.0319536	1.49548	4	4	1	1
O54834	RHG06_MOUSE	Arhgap6	Rho GTPase-activating protein 6	6867.35			13634.7	23530	8826.13	21089.8	27676.7	12.7455			13.735	14.5222	13.1076	14.3643	14.7564	12.7455	12.1943	12.2707	13.735	14.5222	13.1076	14.3643	14.7564	Arhgap6	1.4512	0.0297046	1.52718	4	2	1	1
A0A087WS73	A0A087WS73_MOUSE	Srgap2	SLIT-ROBO Rho GTPase activating protein 2 (Fragment)					10778.6	10695.6	14009.2	16702.3					13.3959	13.3847	13.7741	14.0278	12.2035	12.1943	12.2707	12.2163	13.3959	13.3847	13.7741	14.0278	Srgap2	1.42439	0.000101276	3.99449	4	0	1	1
A0A5F8MPU4	A0A5F8MPU4_MOUSE	Prkg1	cGMP-dependent protein kinase	8233.84				10955.9	8537.99	23947.8	18781.5	13.0073				13.4194	13.0597	14.5476	14.197	13.0073	12.1943	12.2707	12.2163	13.4194	13.0597	14.5476	14.197	Prkg1	1.38375	0.0127287	1.89521	4	1	1	1
Q8K288	TP8L1_MOUSE	Tnfaip8l1	Tumor necrosis factor alpha-induced protein 8-like protein 1				21033.7	15852.4	17787.3	21233.1	16838.9				14.3604	13.9524	14.1186	14.374	14.0395	12.2035	12.1943	12.2707	14.3604	13.9524	14.1186	14.374	14.0395	Tnfaip8l1	1.36388	0.0456025	1.34101	4	1	1	1
F8WID5	F8WID5_MOUSE	Tpm1	Tropomyosin 1, alpha	28897.3	16312.2	31593.8	19373.4	49111.1	61245.5	42033.5	100088	14.8186	13.9937	14.9474	14.2418	15.5838	15.9023	15.3593	16.6109	14.8186	13.9937	14.9474	14.2418	15.5838	15.9023	15.3593	16.6109	Tpm1	1.3637	0.00860895	2.06505	4	4	1	1
O55042	SYUA_MOUSE	Snca	Alpha-synuclein	4927.73	1981.05		1972.62	4134.29	9102.86	11216.7	9658.78	12.2667	10.952		10.9459	12.0134	13.1521	13.4534	13.2376	12.2667	10.952	12.2707	10.9459	12.0134	13.1521	13.4534	13.2376	Snca	1.35528	0.0349764	1.45622	4	3	1	1
Q9D7P9	SPB12_MOUSE	Serpinb12	Serpin B12	44996.6	79687.5	32391	71773	124082	139642	151425	135280	15.4575	16.2821	14.9833	16.1312	16.9209	17.0914	17.2082	17.0456	15.4575	16.2821	14.9833	16.1312	16.9209	17.0914	17.2082	17.0456	Serpinb12	1.35302	0.004607	2.33658	4	4	1	1
Q3V0K9	PLSI_MOUSE	Pls1	Plastin-1	10114.1	6967.67		11836.7	13940.8	18661.7	20800.5	32235.7	13.3041	12.7665		13.531	13.767	14.1878	14.3443	14.9764	13.3041	12.7665	12.2707	13.531	13.767	14.1878	14.3443	14.9764	Pls1	1.35082	0.0116856	1.93235	4	3	1	1
S4R1T7	S4R1T7_MOUSE	Cald1	Caldesmon 1			7460.38		8017.19	14400.9	16872.1	16478.6			12.865		12.9689	13.8139	14.0424	14.0083	12.2035	12.1943	12.865	12.2163	12.9689	13.8139	14.0424	14.0083	Cald1	1.33855	0.00433844	2.36267	4	1	1	1
P39655	LOX12_MOUSE	Alox12	Polyunsaturated fatty acid lipoxygenase ALOX12	22967.5	13339.9	11299	14102.8	28531.8	33660.1	38857	52468.7	14.4873	13.7035	13.4639	13.7837	14.8003	15.0388	15.2459	15.6792	14.4873	13.7035	13.4639	13.7837	14.8003	15.0388	15.2459	15.6792	Alox12	1.33143	0.00362642	2.44052	4	4	1	1
Q63918	CAVN2_MOUSE	Cavin2	Caveolae-associated protein 2	78035.2	50222.8	87683.3	30793.5	69894.3	124079	245111	185422	16.2518	15.6161	16.42	14.9103	16.0929	16.9209	17.9031	17.5005	16.2518	15.6161	16.42	14.9103	16.0929	16.9209	17.9031	17.5005	Cavin2	1.30477	0.0464521	1.33299	4	4	1	1
Q5SSK3	TEFM_MOUSE	Tefm	Transcription elongation factor, mitochondrial					7082.12	9541.94	18074.9	15262.4					12.79	13.2201	14.1417	13.8977	12.2035	12.1943	12.2707	12.2163	12.79	13.2201	14.1417	13.8977	Tefm	1.29113	0.00593741	2.2264	4	0	1	1
Q8C7D2	CRBN_MOUSE	Crbn	Protein cereblon			8063.5		9145.83	14844.4	14225.5	14202.8			12.9772		13.1589	13.8576	13.7962	13.7939	12.2035	12.1943	12.9772	12.2163	13.1589	13.8576	13.7962	13.7939	Crbn	1.25381	0.00261318	2.58283	4	1	1	1
Q9R1W5	CALRL_MOUSE	Calcrl	Calcitonin gene-related peptide type 1 receptor				8237.1	10216.9	13803.6	17199.1	11915.5				13.0079	13.3187	13.7528	14.07	13.5406	12.2035	12.1943	12.2707	13.0079	13.3187	13.7528	14.07	13.5406	Calcrl	1.25138	0.00262717	2.58051	4	1	1	1
Q9QXG9	TINF2_MOUSE	Tinf2	TERF1-interacting nuclear factor 2	10775	2957.51	7578.31		9434.64	16475.6	16456.4	13918.2	13.3954	11.5302	12.8877		13.2038	14.008	14.0064	13.7647	13.3954	11.5302	12.8877	12.2163	13.2038	14.008	14.0064	13.7647	Tinf2	1.23833	0.0325577	1.48735	4	3	1	1
Q8K4F0	CD226_MOUSE	Cd226	CD226 antigen						12719.8	18194.4	15589.4						13.6348	14.1512	13.9283	12.2035	12.1943	12.2707	12.2163	12.0989	13.6348	14.1512	13.9283	Cd226	1.23207	0.0377577	1.42299	3	0	1	1
Q9CQQ4	GEMI2_MOUSE	Gemin2	Gem-associated protein 2	6247.52	5390.05	5690.54	5739.32	11636.8	8290.12	18938.8	17999.8	12.6091	12.3961	12.4743	12.4867	13.5064	13.0172	14.2091	14.1357	12.6091	12.3961	12.4743	12.4867	13.5064	13.0172	14.2091	14.1357	Gemin2	1.22554	0.00509282	2.29304	4	4	1	1
Q3TEI4	CO039_MOUSE		Uncharacterized protein C15orf39 homolog		17554.8			15752.5	12197.4	18258.2	15710.1		14.0996			13.9433	13.5743	14.1563	13.9394	12.2035	14.0996	12.2707	12.2163	13.9433	13.5743	14.1563	13.9394		1.20577	0.0467307	1.3304	4	1	1	1
Q5ND52	MRM3_MOUSE	Mrm3	rRNA methyltransferase 3, mitochondrial	5271.3	1718.15	6636.61		8062.06	11554	10565.2	7764.63	12.3639	10.7466	12.6962		12.9769	13.4961	13.367	12.9227	12.3639	10.7466	12.6962	12.2163	12.9769	13.4961	13.367	12.9227	Mrm3	1.18491	0.0402162	1.3956	4	3	1	1
D7PDD4	G6B_MOUSE	Mpig6b	Megakaryocyte and platelet inhibitory receptor G6b	55399.2	27271.5	45508.1	23028.6	55788.5	73806.9	87188.8	107517	15.7576	14.7351	15.4738	14.4911	15.7677	16.1715	16.4119	16.7142	15.7576	14.7351	15.4738	14.4911	15.7677	16.1715	16.4119	16.7142	Mpig6b	1.15189	0.0185931	1.73065	4	4	1	1
Q8VBZ0	DHRSX_MOUSE	Dhrsx	Polyprenol dehydrogenase	120368	91677.6	36601	109205	150057	195426	197191	185783	16.8771	16.4843	15.1596	16.7367	17.1952	17.5763	17.5892	17.5033	16.8771	16.4843	15.1596	16.7367	17.1952	17.5763	17.5892	17.5033	Dhrsx	1.15156	0.0291904	1.53476	4	4	1	1
P56390	CKS2_MOUSE	Cks2	Cyclin-dependent kinases regulatory subunit 2	52108.7	43417.9	54096.4	44006.5	73080.3	141137	139815	90263.4	15.6692	15.406	15.7232	15.4254	16.1572	17.1067	17.0932	16.4619	15.6692	15.406	15.7232	15.4254	16.1572	17.1067	17.0932	16.4619	Cks2	1.14876	0.00373064	2.42822	4	4	1	1
O55033	NCK2_MOUSE	Nck2	Cytoplasmic protein NCK2	4317.16	15328.1			12804.9	13206.5	12849.2	17242.4	12.0759	13.9039			13.6444	13.689	13.6494	14.0737	12.0759	13.9039	12.2707	12.2163	13.6444	13.689	13.6494	14.0737	Nck2	1.14741	0.0413091	1.38395	4	2	1	1
Q9D8V7	SC11C_MOUSE	Sec11c	Signal peptidase complex catalytic subunit SEC11C	132069	78169.8	58634.5	93183.5	271090	241456	125300	163623	17.0109	16.2543	15.8395	16.5078	18.0484	17.8814	16.935	17.32	17.0109	16.2543	15.8395	16.5078	18.0484	17.8814	16.935	17.32	Sec11c	1.14309	0.0180702	1.74304	4	4	1	1
Q8CG03	PDE5A_MOUSE	Pde5a	cGMP-specific 3',5'-cyclic phosphodiesterase	20226.1	17546.2	17977.7	10595.3	25142	28796.8	50125.2	43150.7	14.3039	14.0989	14.1339	13.3711	14.6178	14.8136	15.6132	15.3971	14.3039	14.0989	14.1339	13.3711	14.6178	14.8136	15.6132	15.3971	Pde5a	1.13348	0.0111525	1.95263	4	4	1	1
Q6PDN3	MYLK_MOUSE	Mylk	Myosin light chain kinase, smooth muscle	8223.78	7016.77		6498.84	10037.9	13113.8	15799.8	19916.5	13.0056	12.7766		12.666	13.2932	13.6788	13.9476	14.2817	13.0056	12.7766	12.2707	12.666	13.2932	13.6788	13.9476	14.2817	Mylk	1.1206	0.00499664	2.30132	4	3	1	1
B2RXM6	B2RXM6_MOUSE	Ly6g6f	Ly6g6f protein	39182.1	19270.7	32606.2	21821.2	38150.1	65942	76837.3	60951.2	15.2579	14.2341	14.9929	14.4134	15.2194	16.0089	16.2295	15.8954	15.2579	14.2341	14.9929	14.4134	15.2194	16.0089	16.2295	15.8954	Ly6g6f	1.11372	0.0139032	1.85688	4	4	1	1
Q9QZU3	Q9QZU3_MOUSE	Gp5	Glycoprotein 5 platelet (Fragment)	11099.5	5922.89	8620.31	7649.65	10556.6	17492.8	20640.3	24282.3	13.4382	12.5321	13.0735	12.9012	13.3659	14.0945	14.3332	14.5676	13.4382	12.5321	13.0735	12.9012	13.3659	14.0945	14.3332	14.5676	Gp5	1.10403	0.0138248	1.85934	4	4	1	1
P51163	HEM4_MOUSE	Uros	Uroporphyrinogen-III synthase			7746.31		7838.84	13766.5	9936.05	16088.9			12.9193		12.9364	13.7489	13.2785	13.9738	12.2035	12.1943	12.9193	12.2163	12.9364	13.7489	13.2785	13.9738	Uros	1.10102	0.00952773	2.02101	4	1	1	1
P48678	LMNA_MOUSE	Lmna	Prelamin-A/C	186446	146705	165125	183291	339888	376666	369769	356881	17.5084	17.1626	17.3332	17.4838	18.3747	18.5229	18.4963	18.4451	17.5084	17.1626	17.3332	17.4838	18.3747	18.5229	18.4963	18.4451	Lmna	1.08776	1.52076e-05	4.81794	4	4	1	1
Q8BH60	GOPC_MOUSE	Gopc	Golgi-associated PDZ and coiled-coil motif-containing protein	68713.2	67904.3	73134.3	52536	62557.3	151439	190327	181128	16.0683	16.0512	16.1583	15.681	15.9329	17.2084	17.5381	17.4667	16.0683	16.0512	16.1583	15.681	15.9329	17.2084	17.5381	17.4667	Gopc	1.04681	0.0360726	1.44282	4	4	1	1
Q60778	IKBB_MOUSE	Nfkbib	NF-kappa-B inhibitor beta	39581.2	46136.6	83758.8	41594.3	59231	147751	109314	119740	15.2725	15.4936	16.354	15.3441	15.8541	17.1728	16.7381	16.8695	15.2725	15.4936	16.354	15.3441	15.8541	17.1728	16.7381	16.8695	Nfkbib	1.04258	0.0329116	1.48265	4	4	1	1
P97447	FHL1_MOUSE	Fhl1	Four and a half LIM domains protein 1	45169.5	20133	29115.2	17882	58206	38642.6	77851.6	47907.6	15.4631	14.2973	14.8295	14.1262	15.8289	15.2379	16.2484	15.548	15.4631	14.2973	14.8295	14.1262	15.8289	15.2379	16.2484	15.548	Fhl1	1.03679	0.031039	1.50809	4	4	1	1
Q9CWZ7	SNAG_MOUSE	Napg	Gamma-soluble NSF attachment protein	250298	152652	208645	134809	205981	351610	538134	484383	17.9333	17.2199	17.6707	17.0406	17.6522	18.4236	19.0376	18.8858	17.9333	17.2199	17.6707	17.0406	17.6522	18.4236	19.0376	18.8858	Napg	1.03369	0.032184	1.49236	4	4	1	1
Q9WTZ0	UXT_MOUSE	Uxt	Protein UXT	37004.4	18230	33186.8	29278.6	40234.1	48049.2	87656.4	67331.1	15.1754	14.154	15.0183	14.8376	15.2961	15.5522	16.4196	16.039	15.1754	14.154	15.0183	14.8376	15.2961	15.5522	16.4196	16.039	Uxt	1.0304	0.0222243	1.65317	4	4	1	1
Q9QXY1	ZO3_MOUSE	Tjp3	Tight junction protein ZO-3						11254.7	12441.2	14525.3						13.4582	13.6028	13.8263	12.2035	12.1943	12.2707	12.2163	12.0989	13.4582	13.6028	13.8263	Tjp3	1.02534	0.0392295	1.40639	3	0	1	1
Q07832	PLK1_MOUSE	Plk1	Serine/threonine-protein kinase PLK1	74760.9	62004.1	69224.8	74264	107545	134604	225227	124997	16.19	15.9201	16.079	16.1804	16.7146	17.0384	17.781	16.9315	16.19	15.9201	16.079	16.1804	16.7146	17.0384	17.781	16.9315	Plk1	1.02401	0.00527106	2.2781	4	4	1	1
Q812E0	CPEB2_MOUSE	Cpeb2	Cytoplasmic polyadenylation element-binding protein 2		10538.1		6693.12	11867.7	13972.7	13297.1	12724.5		13.3633		12.7085	13.5348	13.7703	13.6988	13.6353	12.2035	13.3633	12.2707	12.7085	13.5348	13.7703	13.6988	13.6353	Cpeb2	1.02329	0.00930241	2.0314	4	2	1	1
Q9CQ28	DPH6_MOUSE	Dph6	Diphthine--ammonia ligase	15130.2	16984.2	8521.95	5445.61	6376.73				13.8851	14.0519	13.057	12.4109	12.6386				13.8851	14.0519	13.057	12.4109	12.6386	12.1714	12.2107	12.3248	Dph6	-1.01485	0.0427334	1.36923	1	4	1	1
P08226	APOE_MOUSE	Apoe	Apolipoprotein E	143212	150403	112903	180953	126731	62923.2	53139.5	61966.5	17.1278	17.1985	16.7847	17.4653	16.9514	15.9413	15.6975	15.9192	17.1278	17.1985	16.7847	17.4653	16.9514	15.9413	15.6975	15.9192	Apoe	-1.01671	0.0175551	1.7556	4	4	1	1
Q9JHI7	EXOS9_MOUSE	Exosc9	Exosome complex component RRP45	111971	97420.1	87907	91104.6	92921.9	59033.4	28284.8	30019.2	16.7728	16.5719	16.4237	16.4752	16.5037	15.8492	14.7877	14.8736	16.7728	16.5719	16.4237	16.4752	16.5037	15.8492	14.7877	14.8736	Exosc9	-1.05733	0.0448405	1.34833	4	4	1	1
Q8BZQ7	ANC2_MOUSE	Anapc2	Anaphase-promoting complex subunit 2	145520	140111	141525	130259	128481	57741.2	50506.4	49566.3	17.1509	17.0962	17.1107	16.991	16.9712	15.8173	15.6242	15.5971	17.1509	17.0962	17.1107	16.991	16.9712	15.8173	15.6242	15.5971	Anapc2	-1.08476	0.0163419	1.7867	4	4	1	1
P63024	VAMP3_MOUSE	Vamp3	Vesicle-associated membrane protein 3	111069	74597.2	141092	107152	44995.4	35213	54350.3	68244.8	16.7611	16.1868	17.1063	16.7093	15.4575	15.1038	15.73	16.0584	16.7611	16.1868	17.1063	16.7093	15.4575	15.1038	15.73	16.0584	Vamp3	-1.10344	0.00732692	2.13508	4	4	1	1
Q8BZ98	DYN3_MOUSE	Dnm3	Dynamin-3	286838	255023	398400	324450	198336	220559	119170	80803.7	18.1299	17.9603	18.6039	18.3076	17.5976	17.7508	16.8627	16.3021	18.1299	17.9603	18.6039	18.3076	17.5976	17.7508	16.8627	16.3021	Dnm3	-1.12211	0.0215292	1.66697	4	4	1	1
Q00196	PO2F2_MOUSE	Pou2f2	POU domain, class 2, transcription factor 2	39901.9	35434.2	48387.2	44753.2	10578.6	20167.7	23621.1	24840.8	15.2842	15.1129	15.5623	15.4497	13.3689	14.2998	14.5278	14.6004	15.2842	15.1129	15.5623	15.4497	13.3689	14.2998	14.5278	14.6004	Pou2f2	-1.15306	0.00859642	2.06568	4	4	1	1
O08664	BCL7C_MOUSE	Bcl7c	B-cell CLL/lymphoma 7 protein family member C	74133.1	49803.9	44681.1	73378.3	48438.2	29358.9	14754.6	23569.3	16.1778	15.604	15.4474	16.1631	15.5639	14.8415	13.8489	14.5246	16.1778	15.604	15.4474	16.1631	15.5639	14.8415	13.8489	14.5246	Bcl7c	-1.15334	0.0287448	1.54144	4	4	1	1
Q9CQH3	NDUB5_MOUSE	Ndufb5	NADH dehydrogenase [ubiquinone] 1 beta subcomplex subunit 5, mitochondrial	173751	335420	331711	387369	105027	121707	106081	224359	17.4067	18.3556	18.3396	18.5633	16.6804	16.8931	16.6948	17.7754	17.4067	18.3556	18.3396	18.5633	16.6804	16.8931	16.6948	17.7754	Ndufb5	-1.15537	0.0196619	1.70637	4	4	1	1
Q8CGP5	H2A1F_MOUSE	Hist1h2af	Histone H2A type 1-F	43635	42760.5	103909	101935	18548.1	30173.3	30947.1	43265.2	15.4132	15.384	16.665	16.6373	14.179	14.881	14.9175	15.4009	15.4132	15.384	16.665	16.6373	14.179	14.881	14.9175	15.4009	Hist1h2af	-1.18026	0.0365767	1.4368	4	4	1	1
Q99J23	GHDC_MOUSE	Ghdc	GH3 domain-containing protein	16981.4	20370.2	16599.6	21408.8	11905.8	15272.7			14.0517	14.3142	14.0189	14.3859	13.5394	13.8987			14.0517	14.3142	14.0189	14.3859	13.5394	13.8987	12.2107	12.3248	Ghdc	-1.19925	0.0332186	1.47862	2	4	1	1
Q3UWM4	KDM7A_MOUSE	Kdm7a	Lysine-specific demethylase 7A	17098.2	25358.8	23610.3	29869.1	9627.66		17917.9	13806.1	14.0616	14.6302	14.5271	14.8664	13.233		14.1291	13.753	14.0616	14.6302	14.5271	14.8664	13.233	12.1714	14.1291	13.753	Kdm7a	-1.1997	0.0394587	1.40386	3	4	1	1
P03930	ATP8_MOUSE	Mtatp8	ATP synthase protein 8	155670	136590	127439	203096	150530	43177.9	45147.9	66653.1	17.2481	17.0595	16.9594	17.6318	17.1997	15.398	15.4624	16.0244	17.2481	17.0595	16.9594	17.6318	17.1997	15.398	15.4624	16.0244	Mtatp8	-1.20361	0.0347427	1.45914	4	4	1	1
Q61735	CD47_MOUSE	Cd47	Leukocyte surface antigen CD47	28477.4	34062.9	86428.6	54130.1	14599.2	16089.3	24324.9	28226.6	14.7975	15.0559	16.3992	15.7241	13.8336	13.9738	14.5701	14.7848	14.7975	15.0559	16.3992	15.7241	13.8336	13.9738	14.5701	14.7848	Cd47	-1.20362	0.0302222	1.51967	4	4	1	1
P54099	DPOG1_MOUSE	Polg	DNA polymerase subunit gamma-1	17720.1	19067.4	16321	23425.6	15280.9		9158.64	7086.15	14.1131	14.2188	13.9944	14.5158	13.8994		13.1609	12.7908	14.1131	14.2188	13.9944	14.5158	13.8994	12.1714	13.1609	12.7908	Polg	-1.20492	0.018894	1.72368	3	4	1	1
Q8C0Q2	ZHX3_MOUSE	Zhx3	Zinc fingers and homeoboxes protein 3	28339.5	22167.6	23140.1	22587.1	16335.2	14473.2	9393.53		14.7905	14.4362	14.4981	14.4632	13.9957	13.8211	13.1975		14.7905	14.4362	14.4981	14.4632	13.9957	13.8211	13.1975	12.3248	Zhx3	-1.21223	0.020172	1.69525	3	4	1	1
Q5F285	TM256_MOUSE	Tmem256	Transmembrane protein 256	21975.7	21276	19098.1	22739.4	10130.5	6942.81	13217.9	7100.96	14.4236	14.3769	14.2211	14.4729	13.3064	12.7613	13.6902	12.7938	14.4236	14.3769	14.2211	14.4729	13.3064	12.7613	13.6902	12.7938	Tmem256	-1.23572	0.00166991	2.77731	4	4	1	1
P05977	MYL1_MOUSE	Myl1	Myosin light chain 1/3, skeletal muscle isoform	358656	730388	1062940	335319	382359	207021	151998	237107	18.4522	19.4783	20.0196	18.3552	18.5446	17.6594	17.2137	17.8552	18.4522	19.4783	20.0196	18.3552	18.5446	17.6594	17.2137	17.8552	Myl1	-1.25812	0.042456	1.37206	4	4	1	1
Q8JZX3	POC1A_MOUSE	Poc1a	POC1 centriolar protein homolog A	9874.98	9574.65	17975.8	11414.6					13.2696	13.225	14.1338	13.4786					13.2696	13.225	14.1338	13.4786	12.0989	12.1714	12.2107	12.3248	Poc1a	-1.32528	0.000836889	3.07733	0	4	1	1
A0A2I3BPY7	A0A2I3BPY7_MOUSE	Rai14	Retinoic acid induced 14	28423.2	46645.3	34931.9	39693.3	15384.7	14383.5	17663.7	11178.9	14.7948	15.5094	15.0923	15.2766	13.9092	13.8121	14.1085	13.4485	14.7948	15.5094	15.0923	15.2766	13.9092	13.8121	14.1085	13.4485	Rai14	-1.34869	0.000586633	3.23163	4	4	1	1
Q80WS3	FBLL1_MOUSE	Fbll1	rRNA/tRNA 2'-O-methyltransferase fibrillarin-like protein 1		13983.3	18295.4	17471.5						13.7714	14.1592	14.0927					12.2035	13.7714	14.1592	14.0927	12.0989	12.1714	12.2107	12.3248	Fbll1	-1.35526	0.0260309	1.58451	0	3	1	1
Q8VD57	SFT2B_MOUSE	Sft2d2	Vesicle transport protein SFT2B	27047.1	16632.9	20475.8	17366.5	10306.7			16405.3	14.7232	14.0218	14.3216	14.084	13.3313			14.0019	14.7232	14.0218	14.3216	14.084	13.3313	12.1714	12.2107	14.0019	Sft2d2	-1.35884	0.0287425	1.54148	2	4	1	1
A0A0B4J1H7;A0A0B4J1H8	A0A0B4J1H7_MOUSE;A0A0B4J1H8_MOUSE	Igkv1-133;Igkv1-135	Immunoglobulin kappa variable 1-135 (Fragment)		19219.6	15528.8	11239				3412.23		14.2303	13.9227	13.4562				11.7365	12.2035	14.2303	13.9227	13.4562	12.0989	12.1714	12.2107	11.7365	Igkv1-133;Igkv1-135	-1.3988	0.0225658	1.64655	1	3	1	1
Q64523;Q6GSS7	H2A2A_MOUSE;H2A2C_MOUSE	H2ac20;Hist2h2aa1	Histone H2A type 2-C	15421.8	14109.5	48084.4	40324.9	6964.56	10023.5	11222.3	11083	13.9127	13.7844	15.5533	15.2994	12.7658	13.2911	13.4541	13.4361	13.9127	13.7844	15.5533	15.2994	12.7658	13.2911	13.4541	13.4361	H2ac20;Hist2h2aa1	-1.40067	0.0281183	1.55101	4	4	1	1
Q8R429	AT2A1_MOUSE	Atp2a1	Sarcoplasmic/endoplasmic reticulum calcium ATPase 1	9873.51	17412.1	32372.2	6434.72			6690.53		13.2693	14.0878	14.9825	12.6517			12.7079		13.2693	14.0878	14.9825	12.6517	12.0989	12.1714	12.7079	12.3248	Atp2a1	-1.42207	0.034866	1.4576	1	4	1	1
F8VQM8;D3Z526;E9PVR2	D3Z526_MOUSE;E9PVR2_MOUSE;F8VQM8_MOUSE	Xndc1;Xntrpc	Xrcc1 N-terminal domain containing 1 (Fragment)	18501.6	15247.9	18900.5						14.1754	13.8963	14.2061						14.1754	13.8963	14.2061	12.2163	12.0989	12.1714	12.2107	12.3248	Xndc1;Xntrpc	-1.42208	0.0245087	1.61068	0	3	1	1
Q61152	PTN18_MOUSE	Ptpn18	Tyrosine-protein phosphatase non-receptor type 18	441700	619834	823594	509484	126215	140678	395139	299635	18.7527	19.2415	19.6516	18.9587	16.9455	17.102	18.592	18.1928	18.7527	19.2415	19.6516	18.9587	16.9455	17.102	18.592	18.1928	Ptpn18	-1.44302	0.0182824	1.73797	4	4	1	1
Q64467	G3PT_MOUSE	Gapdhs	Glyceraldehyde-3-phosphate dehydrogenase, testis-specific	381088	349975	412570	373354	120277	124036	131369	186744	18.5398	18.4169	18.6543	18.5102	16.876	16.9204	17.0033	17.5107	18.5398	18.4169	18.6543	18.5102	16.876	16.9204	17.0033	17.5107	Gapdhs	-1.45269	8.28128e-05	4.0819	4	4	1	1
Q4VA53	PDS5B_MOUSE	Pds5b	Sister chromatid cohesion protein PDS5 homolog B	26574.2	21620	28762.7	19715.7	10480.9	8363.21	6196.67	10664.1	14.6977	14.4001	14.8119	14.2671	13.3555	13.0298	12.5973	13.3805	14.6977	14.4001	14.8119	14.2671	13.3555	13.0298	12.5973	13.3805	Pds5b	-1.45343	0.000614707	3.21133	4	4	1	1
P14434;P14438	HA2B_MOUSE;HA2U_MOUSE	H2-Aa	H-2 class II histocompatibility antigen, A-B alpha chain	13817.1	10444.9	28907.5	29694.4	4899.97		8885.49	10919.7	13.7542	13.3505	14.8192	14.8579	12.2586		13.1172	13.4146	13.7542	13.3505	14.8192	14.8579	12.2586	12.1714	13.1172	13.4146	H2-Aa	-1.45499	0.0251101	1.60015	3	4	1	1
Q8K5B2	MCFD2_MOUSE	Mcfd2	Multiple coagulation factor deficiency protein 2 homolog	8271.61	10113.3	16069.3	11576.1		2399.61	2899.13	8160.65	13.014	13.304	13.972	13.4989		11.2286	11.5014	12.9945	13.014	13.304	13.972	13.4989	12.0989	11.2286	11.5014	12.9945	Mcfd2	-1.49136	0.0146559	1.83399	3	4	1	1
P13609	SRGN_MOUSE	Srgn	Serglycin	27838.9	18988.6	25363.1	25787		18676	12807.6		14.7648	14.2128	14.6304	14.6544		14.1889	13.6447		14.7648	14.2128	14.6304	14.6544	12.0989	14.1889	13.6447	12.3248	Srgn	-1.50128	0.0279904	1.55299	2	4	1	1
Q5SRX1	TM1L2_MOUSE	Tom1l2	TOM1-like protein 2	50674.4	48432.7	52316.6	34354.1	16569.7	11220.1	13421	25100.7	15.629	15.5637	15.675	15.0682	14.0163	13.4538	13.7122	14.6154	15.629	15.5637	15.675	15.0682	14.0163	13.4538	13.7122	14.6154	Tom1l2	-1.53453	0.00174213	2.75892	4	4	1	1
Q8BPA8	DPCD_MOUSE	Dpcd	Protein DPCD	16889.9	22018.8	13854.6	28855.4	13721.7		6350.66		14.0439	14.4264	13.7581	14.8166	13.7442		12.6327		14.0439	14.4264	13.7581	14.8166	13.7442	12.1714	12.6327	12.3248	Dpcd	-1.54298	0.0107646	1.968	2	4	1	1
Q8BYP3	RHOF_MOUSE	Rhof	Rho-related GTP-binding protein RhoF	44047.5	26938.7	16467.1	29360.1	20275.6	14031.6			15.4268	14.7174	14.0073	14.8416	14.3075	13.7764			15.4268	14.7174	14.0073	14.8416	14.3075	13.7764	12.2107	12.3248	Rhof	-1.59341	0.0376511	1.42422	2	4	1	1
Q8C6G1	CF410_MOUSE	Cfap410	Cilia- and flagella-associated protein 410	18566	23956.5	19738.4	22362.7				23246.2	14.1804	14.5481	14.2687	14.4488				14.5047	14.1804	14.5481	14.2687	14.4488	12.0989	12.1714	12.2107	14.5047	Cfap410	-1.61508	0.0343691	1.46383	1	4	1	1
H3BJB6	H3BJB6_MOUSE	Cct8	Chaperonin containing TCP1 subunit 8 (Fragment)	56577.2	59096.3	73325.8	71272.6	63067	26674	11015.3	9753.89	15.7879	15.8508	16.162	16.1211	15.9446	14.7031	13.4272	13.2518	15.7879	15.8508	16.162	16.1211	15.9446	14.7031	13.4272	13.2518	Cct8	-1.64877	0.040732	1.39006	4	4	1	1
Q4FK66	PR38A_MOUSE	Prpf38a	Pre-mRNA-splicing factor 38A	64288	171678	405432	77327.9	46735.5	44873.8	32809.9	47947.2	15.9723	17.3893	18.6291	16.2387	15.5122	15.4536	15.0018	15.5492	15.9723	17.3893	18.6291	16.2387	15.5122	15.4536	15.0018	15.5492	Prpf38a	-1.67815	0.0353976	1.45103	4	4	1	1
Q3U2A5	Q3U2A5_MOUSE	D030056L22Rik	RIKEN cDNA D030056L22 gene	12265.8	19336.5	13219.6	15556.7		3001.02	6848.57		13.5824	14.239	13.6904	13.9252		11.5512	12.7416		13.5824	14.239	13.6904	13.9252	12.0989	11.5512	12.7416	12.3248	D030056L22Rik	-1.68012	0.00110764	2.9556	2	4	1	1
Q9QZ47	TNNT3_MOUSE	Tnnt3	Troponin T, fast skeletal muscle	9183.59	23102.7	53071.5	9984.72				9792.99	13.1648	14.4958	15.6956	13.2855				13.2575	13.1648	14.4958	15.6956	13.2855	12.0989	12.1714	12.2107	13.2575	Tnnt3	-1.72581	0.0386362	1.41301	1	4	1	1
P01844;P01845	LAC2_MOUSE;LAC3_MOUSE	Iglc2;Iglc3	Ig lambda-2 chain C region	13538.8	28249.5	20537.2	44785.9				23511.1	13.7248	14.7859	14.326	15.4508				14.5211	13.7248	14.7859	14.326	15.4508	12.0989	12.1714	12.2107	14.5211	Iglc2;Iglc3	-1.82135	0.0393858	1.40466	1	4	1	1
Q3UMC0	AFG2A_MOUSE	Afg2a	ATPase family gene 2 protein homolog A	112218	102497	41757.8	132175	24086	21513.3	17269.6	44571.6	16.7759	16.6452	15.3498	17.0121	14.5559	14.3929	14.0759	15.4438	16.7759	16.6452	15.3498	17.0121	14.5559	14.3929	14.0759	15.4438	Afg2a	-1.8286	0.0084184	2.07477	4	4	1	1
Q8BLN5	LSS_MOUSE	Lss	Lanosterol synthase	23451.9	19856.6	20502.3	22776.8			11801.8		14.5174	14.2773	14.3235	14.4753			13.5267		14.5174	14.2773	14.3235	14.4753	12.0989	12.1714	13.5267	12.3248	Lss	-1.86793	0.00153239	2.81463	1	4	1	1
G3X9Q3	G3X9Q3_MOUSE	Arhgap45	Rho GTPase activating protein 45	58858.9	57457.3	89444.8	64625.9	10642.6	15824	22023	26854.7	15.845	15.8102	16.4487	15.9798	13.3776	13.9498	14.4267	14.7129	15.845	15.8102	16.4487	15.9798	13.3776	13.9498	14.4267	14.7129	Arhgap45	-1.90418	0.00113382	2.94546	4	4	1	1
Q8CH40	NUDT6_MOUSE	Nudt6	Nucleoside diphosphate-linked moiety X motif 6	21859.1	21421	30231.9	22546.7		10540.5	6756.66		14.4159	14.3867	14.8838	14.4606		13.3637	12.7221		14.4159	14.3867	14.8838	14.4606	12.0989	13.3637	12.7221	12.3248	Nudt6	-1.9094	0.000715273	3.14553	2	4	1	1
cRAP-P04040	cRAP-CATA_HUMAN	cRAP-CAT	Catalase	31768.6	17258.6		39193.7					14.9553	14.075		15.2583					14.9553	14.075	12.2707	15.2583	12.0989	12.1714	12.2107	12.3248	cRAP-CAT	-1.9384	0.0281011	1.55128	0	3	1	1
Q91VR7	MLP3A_MOUSE	Map1lc3a	Microtubule-associated proteins 1A/1B light chain 3A	34350.7	22172.8	24544.7	41907.3	31808.7				15.0681	14.4365	14.5831	15.3549	14.9571				15.0681	14.4365	14.5831	15.3549	14.9571	12.1714	12.2107	12.3248	Map1lc3a	-1.94464	0.0344204	1.46318	1	4	1	1
P97772	GRM1_MOUSE	Grm1	Metabotropic glutamate receptor 1		19812.4	34433.5	33626.7						14.2741	15.0715	15.0373					12.2035	14.2741	15.0715	15.0373	12.0989	12.1714	12.2107	12.3248	Grm1	-1.94517	0.0279934	1.55294	0	3	1	1
Q9WUV0	ORC5_MOUSE	Orc5	Origin recognition complex subunit 5	14801.3	35060.7	36254	28200.2		18950.1			13.8534	15.0976	15.1459	14.7834		14.2099			13.8534	15.0976	15.1459	14.7834	12.0989	14.2099	12.2107	12.3248	Orc5	-2.00897	0.0138504	1.85854	1	4	1	1
A3KGU5;E9Q447;A3KGU7;A3KGU9	A3KGU5_MOUSE;A3KGU7_MOUSE;A3KGU9_MOUSE;E9Q447_MOUSE	Sptan1	Spectrin alpha, non-erythrocytic 1	35959.7	48814.8	38703.3	50492.7	14709.8	5893.72		27204.7	15.1341	15.575	15.2402	15.6238	13.8445	12.525		14.7316	15.1341	15.575	15.2402	15.6238	13.8445	12.525	12.2107	14.7316	Sptan1	-2.06533	0.0136744	1.86409	3	4	1	1
A0A668KLE6	A0A668KLE6_MOUSE	Afdn	Afadin, adherens junction formation factor (Fragment)	15898.9	20006	23004.8	22720.4					13.9566	14.2881	14.4896	14.4717					13.9566	14.2881	14.4896	14.4717	12.0989	12.1714	12.2107	12.3248	Afdn	-2.10008	3.97568e-06	5.40059	0	4	1	1
Q9CPP0	NPM3_MOUSE	Npm3	Nucleoplasmin-3	710996	679654	331891	680356	441558	90275	81172.7	68760.8	19.4395	19.3744	18.3403	19.3759	18.7522	16.462	16.3087	16.0693	19.4395	19.3744	18.3403	19.3759	18.7522	16.462	16.3087	16.0693	Npm3	-2.23448	0.016408	1.78495	4	4	1	1
Q9QZL6	UBP21_MOUSE	Usp21	Ubiquitin carboxyl-terminal hydrolase 21	98251.4	57491.1	30597.3	57557.3			29484.1	33419.4	16.5842	15.8111	14.9011	15.8127			14.8476	15.0284	16.5842	15.8111	14.9011	15.8127	12.0989	12.1714	14.8476	15.0284	Usp21	-2.24069	0.0437402	1.35912	2	4	1	1
A0A571BF46;A0A571BF58	A0A571BF46_MOUSE;A0A571BF58_MOUSE	Neb	Nebulin	16244	32594.9	75562.5	14977				12121.2	13.9876	14.9924	16.2054	13.8705				13.5652	13.9876	14.9924	16.2054	13.8705	12.0989	12.1714	12.2107	13.5652	Neb	-2.2524	0.0130906	1.88304	1	4	1	1
P49290	PERE_MOUSE	Epx	Eosinophil peroxidase	1184970	2391950	2737090	2382680	374778	88647	611669	1506710	20.1764	21.1898	21.3842	21.1842	18.5157	16.4358	19.2224	20.523	20.1764	21.1898	21.3842	21.1842	18.5157	16.4358	19.2224	20.523	Epx	-2.30943	0.0420243	1.3765	4	4	1	1
A0A0R4J1A8;A0A0R4J1B0;A2A6I0;A2A6I3;A2A6I5;Z4YKD9	A0A0R4J1A8_MOUSE;A0A0R4J1B0_MOUSE;A2A6I0_MOUSE;A2A6I3_MOUSE;A2A6I5_MOUSE;Z4YKD9_MOUSE	Tnnt3	Troponin T, fast skeletal muscle	36841.9	72331.7	117463	36456.8			29548.4	26618.4	15.1691	16.1423	16.8418	15.1539			14.8508	14.7001	15.1691	16.1423	16.8418	15.1539	12.0989	12.1714	14.8508	14.7001	Tnnt3	-2.37149	0.0338134	1.47091	2	4	1	1
A2ASS6	TITIN_MOUSE	Ttn	Titin	20256.3	60573.1	131518	25228.1			8756.43	23053.3	14.3061	15.8864	17.0049	14.6227			13.0961	14.4927	14.3061	15.8864	17.0049	14.6227	12.0989	12.1714	13.0961	14.4927	Ttn	-2.49026	0.0243655	1.61322	2	4	1	1
Q9DAV6;I7HJI5;Q9D6A7	I7HJI5_MOUSE;Q9D6A7_MOUSE;Q9DAV6_MOUSE	Serpinb9b;Serpinb9c	Serine (or cysteine) peptidase inhibitor, clade B, member 9c	47487.8	39227.3		85669.9					15.5353	15.2596		16.3865					15.5353	15.2596	12.2707	16.3865	12.0989	12.1714	12.2107	12.3248	Serpinb9b;Serpinb9c	-2.66156	0.025156	1.59936	0	3	1	1
Q8BVW3	TRI14_MOUSE	Trim14	Tripartite motif-containing protein 14	42725.7	47945.5	51313.8	49374.7	6105.19		6734.22	10981.2	15.3828	15.5491	15.6471	15.5915	12.5758		12.7173	13.4227	15.3828	15.5491	15.6471	15.5915	12.5758	12.1714	12.7173	13.4227	Trim14	-2.82081	4.21719e-05	4.37498	3	4	1	1
P68033;P68134	ACTC_MOUSE;ACTS_MOUSE	Acta1;Actc1	Actin, alpha cardiac muscle 1	550767	1039500	1977180	644997	98803.4	46295.7	140887	369456	19.0711	19.9875	20.915	19.2989	16.5923	15.4986	17.1042	18.495	19.0711	19.9875	20.915	19.2989	16.5923	15.4986	17.1042	18.495	Acta1;Actc1	-2.8956	0.00822175	2.08504	4	4	1	1
P97457	MYL11_MOUSE	Myl11	Myosin regulatory light chain 11	62864.6	213833	340552	92359	11519.1		29966.1	75394.4	15.94	17.7061	18.3775	16.495	13.4917		14.871	16.2022	15.94	17.7061	18.3775	16.495	13.4917	12.1714	14.871	16.2022	Myl11	-2.94557	0.0290305	1.53715	3	4	1	1
Q5SX39	MYH4_MOUSE	Myh4	Myosin-4	544766	1510520	3187580	676511	92313.5	37718.7	242618	506660	19.0553	20.5266	21.604	19.3678	16.4943	15.203	17.8883	18.9507	19.0553	20.5266	21.604	19.3678	16.4943	15.203	17.8883	18.9507	Myh4	-3.00436	0.024156	1.61697	4	4	1	1
P02301;P84244	H33_MOUSE;H3C_MOUSE	H3-3a;H3-5	Histone H3.3C	409110	560368	627498	546879		178058	96471.4	155708	18.6421	19.096	19.2593	19.0609		17.442	16.5578	17.2485	18.6421	19.096	19.2593	19.0609	12.0989	17.442	16.5578	17.2485	H3-3a;H3-5	-3.17777	0.0460416	1.33685	3	4	1	1
Q9Z2U4	ELF4_MOUSE	Elf4	ETS-related transcription factor Elf-4	88694.2	94186.3	86996.3	120500	70503.7	9813.6	2366.39	3778.37	16.4366	16.5232	16.4087	16.8787	16.1054	13.2606	11.2085	11.8835	16.4366	16.5232	16.4087	16.8787	16.1054	13.2606	11.2085	11.8835	Elf4	-3.44728	0.0194966	1.71004	4	4	1	1
Q8CIM3	D2HDH_MOUSE	D2hgdh	D-2-hydroxyglutarate dehydrogenase, mitochondrial	77919.2	71115.6	81187.7	71073.1	5822.83	5305.11		3941.65	16.2497	16.1179	16.309	16.117	12.5075	12.3732		11.9446	16.2497	16.1179	16.309	16.117	12.5075	12.3732	12.2107	11.9446	D2hgdh	-3.9394	8.71426e-08	7.05977	3	4	1	1
Q9CPW5	SSRB_MOUSE	Ssr2	Translocon-associated protein subunit beta	156848	286781	217192	248630				283256	17.259	18.1296	17.7286	17.9236				18.1117	17.259	18.1296	17.7286	17.9236	12.0989	12.1714	12.2107	18.1117	Ssr2	-4.11203	0.0336443	1.47309	1	4	1	1
Q8CFW1	ANO2_MOUSE	Ano2	Anoctamin-2	227517	268131	156596	214726				139841	17.7956	18.0326	17.2567	17.7121				17.0934	17.7956	18.0326	17.2567	17.7121	12.0989	12.1714	12.2107	17.0934	Ano2	-4.30565	0.0134548	1.87112	1	4	1	1
E9Q4P1	WDFY1_MOUSE	Wdfy1	WD repeat and FYVE domain-containing protein 1	70923.8	81484.4	172446	97988.8					16.114	16.3142	17.3958	16.5803					16.114	16.3142	17.3958	16.5803	12.0989	12.1714	12.2107	12.3248	Wdfy1	-4.39963	4.72245e-06	5.32583	0	4	1	1
Q8K1K6	SPB10_MOUSE	Serpinb10	Serpin B10	307313	228872	273695	227997					18.2293	17.8042	18.0622	17.7987					18.2293	17.8042	18.0622	17.7987	12.0989	12.1714	12.2107	12.3248	Serpinb10	-5.77214	4.24262e-09	8.37237	0	4	1	1
Q61941	NNTM_MOUSE	Nnt	NAD(P) transhydrogenase, mitochondrial	413680	410128	445518	463088		36516.6			18.6582	18.6457	18.7651	18.8209		15.1563			18.6582	18.6457	18.7651	18.8209	12.0989	15.1563	12.2107	12.3248	Nnt	-5.7748	0.000231471	3.6355	1	4	1	1
Q91WA1	TIPIN_MOUSE	Tipin	TIMELESS-interacting protein	42411.4				126037	120234	134867		15.3722				16.9435	16.8755	17.0412		15.3722	12.1943	12.2707	12.2163	16.9435	16.8755	17.0412	12.3248	Tipin	2.78286	0.0939145	1.02727	3	1	1	0
G3X9Y6	G3X9Y6_MOUSE	Akr1c19	Aldo-keto reductase family 1, member C19					181043	165702							17.466	17.3382			12.2035	12.1943	12.2707	12.2163	17.466	17.3382	12.2107	12.3248	Akr1c19	2.61371	0.128388	0.891476	2	0	1	0
Q0VAW6	Q0VAW6_MOUSE	Ark2n	Arkadia (RNF111) N-terminal like PKA signaling regulator 2N	51040.9			42503.1	82529.1	72677.8	88573.9	40622.6	15.6394			15.3753	16.3326	16.1492	16.4346	15.31	15.6394	12.1943	12.2707	15.3753	16.3326	16.1492	16.4346	15.31	Ark2n	2.18668	0.0673446	1.1717	4	2	1	0
O35473	C1D_MOUSE	C1d	Nuclear nucleic acid-binding protein C1D		28023			50822.6	58231.5	73474.1			14.7743			15.6332	15.8295	16.1649		12.2035	14.7743	12.2707	12.2163	15.6332	15.8295	16.1649	12.3248	C1d	2.12189	0.101414	0.993903	3	1	1	0
Q9CQE3	RT17_MOUSE	Mrps17	Small ribosomal subunit protein uS17m	37502.4	17773.2			49080.7	45242.8	42436.2	27040	15.1947	14.1174			15.5829	15.4654	15.373	14.7228	15.1947	14.1174	12.2707	12.2163	15.5829	15.4654	15.373	14.7228	Mrps17	1.83623	0.0511011	1.29157	4	2	1	0
A2APV2	FMNL2_MOUSE	Fmnl2	Formin-like protein 2							62492	51615.6							15.9314	15.6555	12.2035	12.1943	12.2707	12.2163	12.0989	12.1714	15.9314	15.6555	Fmnl2	1.74307	0.150489	0.822494	2	0	1	0
A0A3Q4L2X3	A0A3Q4L2X3_MOUSE	Hnrnpm	Heterogeneous nuclear ribonucleoprotein M (Fragment)	9627.37	9151.75	44111.3	17967.2	13635.1	133228	125928	35022.5	13.2329	13.1598	15.4289	14.1331	13.735	17.0235	16.9422	15.096	13.2329	13.1598	15.4289	14.1331	13.735	17.0235	16.9422	15.096	Hnrnpm	1.71053	0.122475	0.911954	4	4	1	0
Q9D5U8	CNBD2_MOUSE	Cnbd2	Cyclic nucleotide-binding domain-containing protein 2	24322.5				31523.8	42638.4	39239		14.57				14.9442	15.3799	15.26		14.57	12.1943	12.2707	12.2163	14.9442	15.3799	15.26	12.3248	Cnbd2	1.66437	0.124001	0.906575	3	1	1	0
Q9Z0P7	SUFU_MOUSE	Sufu	Suppressor of fused homolog							57734.4	39143.5							15.8171	15.2565	12.2035	12.1943	12.2707	12.2163	12.0989	12.1714	15.8171	15.2565	Sufu	1.61475	0.153611	0.813578	2	0	1	0
Q8VEJ9	VPS4A_MOUSE	Vps4a	Vacuolar protein sorting-associated protein 4A	95111.7	79280.4	194121	27851.8	126217	283260	322443	274124	16.5373	16.2747	17.5666	14.7655	16.9455	18.1118	18.2987	18.0645	16.5373	16.2747	17.5666	14.7655	16.9455	18.1118	18.2987	18.0645	Vps4a	1.56909	0.0536294	1.2706	4	4	1	0
A0A0J9YU71;F7CTH4	A0A0J9YU71_MOUSE;F7CTH4_MOUSE	Zfp811	Zinc finger protein 811	23892.4				27019.9	36717.3	32263.9		14.5443				14.7217	15.1642	14.9776		14.5443	12.1943	12.2707	12.2163	14.7217	15.1642	14.9776	12.3248	Zfp811	1.49068	0.141608	0.848913	3	1	1	0
Q3TT38	ILRUN_MOUSE	Ilrun	Protein ILRUN	18354.2		21009.1		31714.6	37289.9	20531.8	21019.3	14.1638		14.3587		14.9529	15.1865	14.3256	14.3594	14.1638	12.1943	14.3587	12.2163	14.9529	15.1865	14.3256	14.3594	Ilrun	1.47279	0.0588015	1.23061	4	2	1	0
A2AIM4	A2AIM4_MOUSE	Tpm2	Tropomyosin beta chain	26831.6	8068.62			28999	24007.5	11358.4	35226.1	14.7116	12.9781			14.8237	14.5512	13.4715	15.1044	14.7116	12.9781	12.2707	12.2163	14.8237	14.5512	13.4715	15.1044	Tpm2	1.44349	0.0790045	1.10235	4	2	1	0
Q99KS6	ADPRM_MOUSE	Adprm	Manganese-dependent ADP-ribose/CDP-alcohol diphosphatase						11207.3	38796.3	14199.4						13.4522	15.2436	13.7935	12.2035	12.1943	12.2707	12.2163	12.0989	13.4522	15.2436	13.7935	Adprm	1.42583	0.0694336	1.15843	3	0	1	0
P27005	S10A8_MOUSE	S100a8	Protein S100-A8	63838.6	125750				138090	227564	70239.5	15.9621	16.9402				17.0752	17.7959	16.1	15.9621	16.9402	12.2707	12.2163	12.0989	17.0752	17.7959	16.1	S100a8	1.42017	0.45285	0.344046	3	2	1	0
Q3TTN6;Q7TPG0;A0A3B2W887	A0A3B2W887_MOUSE;Q3TTN6_MOUSE;Q7TPG0_MOUSE	1700010I14Rik	RIKEN cDNA 1700010I14 gene (Fragment)	63490.8			80920.8	127782	111543	78600.6		15.9543			16.3042	16.9633	16.7672	16.2623		15.9543	12.1943	12.2707	16.3042	16.9633	16.7672	16.2623	12.3248	1700010I14Rik	1.39852	0.407751	0.389605	3	2	1	0
Q8R0X2	CACL1_MOUSE	Cacul1	CDK2-associated and cullin domain-containing protein 1					28450.6		6296.3	29935.5					14.7962		12.6203	14.8696	12.2035	12.1943	12.2707	12.2163	14.7962	12.1714	12.6203	14.8696	Cacul1	1.39312	0.09734	1.01171	3	0	1	0
cRAP-P01008;P32261	ANT3_MOUSE;cRAP-ANT3_HUMAN	Serpinc1;cRAP-SERPINC1	Antithrombin-III	30030.9		38049.8		28691.1	33637.3	35727.4	34862.8	14.8742		15.2156		14.8083	15.0378	15.1247	15.0894	14.8742	12.1943	15.2156	12.2163	14.8083	15.0378	15.1247	15.0894	Serpinc1;cRAP-SERPINC1	1.38996	0.143313	0.843715	4	2	1	0
Q8CGP1	H2B1K_MOUSE	H2bc12	Histone H2B type 1-K	32154.1	7223.15		12754.6	49431.1	53640.8	49687.4		14.9727	12.8184		13.6387	15.5931	15.711	15.6006		14.9727	12.8184	12.2707	13.6387	15.5931	15.711	15.6006	12.3248	H2bc12	1.38225	0.222246	0.653166	3	3	1	0
Q9CR59	G45IP_MOUSE	Gadd45gip1	Large ribosomal subunit protein mL64			21265.5	15612.4	21312.3	19714	26730.5	30151.2			14.3762	13.9304	14.3794	14.2669	14.7062	14.8799	12.2035	12.1943	14.3762	13.9304	14.3794	14.2669	14.7062	14.8799	Gadd45gip1	1.38199	0.0573055	1.2418	4	2	1	0
Q8R080	GTSE1_MOUSE	Gtse1	G2 and S phase-expressed protein 1	12327.3		19401.4		11478.1	29689.9	32411.9	17296.4	13.5896		14.2439		13.4866	14.8577	14.9842	14.0782	13.5896	12.1943	14.2439	12.2163	13.4866	14.8577	14.9842	14.0782	Gtse1	1.29065	0.082791	1.08202	4	2	1	0
Q66X19	NAL4E_MOUSE	Nlrp4e	NACHT, LRR and PYD domains-containing protein 4E				16662.2		20115.7	26829.1	27527				14.0243		14.296	14.7115	14.7486	12.2035	12.1943	12.2707	14.0243	12.0989	14.296	14.7115	14.7486	Nlrp4e	1.29053	0.14676	0.833391	3	1	1	0
Q9Z2F7	BNI3L_MOUSE	Bnip3l	BCL2/adenovirus E1B 19 kDa protein-interacting protein 3-like	33838.9			10015.3	28456.6	26476.3	19389.5	18622.4	15.0464			13.2899	14.7965	14.6924	14.243	14.1848	15.0464	12.1943	12.2707	13.2899	14.7965	14.6924	14.243	14.1848	Bnip3l	1.27881	0.109882	0.959072	4	2	1	0
A1Y9I9	TOMT_MOUSE	Tomt	Transmembrane O-methyltransferase homolog	156411	115322		86078.2	170542	124701	147436	78331.7	17.255	16.8153		16.3934	17.3798	16.9281	17.1697	16.2573	17.255	16.8153	12.2707	16.3934	17.3798	16.9281	17.1697	16.2573	Tomt	1.25013	0.328906	0.482929	4	3	1	0
Q571I9	A16A1_MOUSE	Aldh16a1	Aldehyde dehydrogenase family 16 member A1	465786	86909.5	104542	122385	567350	363660	225031	351964	18.8293	16.4072	16.6737	16.9011	19.1139	18.4722	17.7798	18.4251	18.8293	16.4072	16.6737	16.9011	19.1139	18.4722	17.7798	18.4251	Aldh16a1	1.2449	0.0894236	1.04855	4	4	1	0
P97480	EYA3_MOUSE	Eya3	Eyes absent homolog 3	35971.2			13349.3	38827.4	35240.5	46988.1		15.1346			13.7045	15.2448	15.1049	15.52		15.1346	12.1943	12.2707	13.7045	15.2448	15.1049	15.52	12.3248	Eya3	1.22262	0.275969	0.559139	3	2	1	0
Q9DB16	CB39L_MOUSE	Cab39l	Calcium-binding protein 39-like		51120.6	43892.7		78255.4	61741.6	60070.1			15.6416	15.4217		16.2559	15.914	15.8744		12.2035	15.6416	15.4217	12.2163	16.2559	15.914	15.8744	12.3248	Cab39l	1.22148	0.395193	0.40319	3	2	1	0
Q9CPN8	IF2B3_MOUSE	Igf2bp3	Insulin-like growth factor 2 mRNA-binding protein 3						79764.4	7825.35							16.2835	12.9339		12.2035	12.1943	12.2707	12.2163	12.0989	16.2835	12.9339	12.3248	Igf2bp3	1.18906	0.267943	0.571957	2	0	1	0
A6H687	SAC31_MOUSE	Sac3d1	SAC3 domain-containing protein 1	17406.3	16523.7		21855.8	26558.2	29388.9	29029.8	31548	14.0873	14.0122		14.4157	14.6969	14.843	14.8252	14.9453	14.0873	14.0122	12.2707	14.4157	14.6969	14.843	14.8252	14.9453	Sac3d1	1.13108	0.0588343	1.23037	4	3	1	0
Q99K45	Q99K45_MOUSE	Zfp810	Zinc finger protein 810							112280								16.7767		12.2035	12.1943	12.2707	12.2163	12.0989	12.1714	16.7767	12.3248	Zfp810	1.12173	0.365348	0.437293	1	0	0	0
O54724	CAVN1_MOUSE	Cavin1	Caveolae-associated protein 1	11981.9		12234.4		9866.39	12849.4	30685.1	18550.9	13.5486		13.5787		13.2683	13.6494	14.9053	14.1792	13.5486	12.1943	13.5787	12.2163	13.2683	13.6494	14.9053	14.1792	Cavin1	1.11608	0.079308	1.10068	4	2	1	0
P0C191	GPVI_MOUSE	Gp6	Platelet glycoprotein VI	9595.6		17377.6		12211.1	20091.1	13493.8	23897.2	13.2282		14.0849		13.5759	14.2943	13.72	14.5446	13.2282	12.1943	14.0849	12.2163	13.5759	14.2943	13.72	14.5446	Gp6	1.10275	0.0734584	1.13396	4	2	1	0
Q9R0Q6	ARC1A_MOUSE	Arpc1a	Actin-related protein 2/3 complex subunit 1A	37693.2	36318.3	49058.2	19464.3	27417.8	81056.6	102964	121339	15.202	15.1484	15.5822	14.2485	14.7428	16.3066	16.6518	16.8887	15.202	15.1484	15.5822	14.2485	14.7428	16.3066	16.6518	16.8887	Arpc1a	1.10219	0.0964926	1.01551	4	4	1	0
Q9D0Y8	RM52_MOUSE	Mrpl52	Large ribosomal subunit protein mL52	7475.55	5973.66	1970.78		8818.71	13626.1	9628.26	7507.93	12.868	12.5444	10.9446		13.1064	13.7341	13.2331	12.8742	12.868	12.5444	10.9446	12.2163	13.1064	13.7341	13.2331	12.8742	Mrpl52	1.09362	0.0544325	1.26414	4	3	1	0
A0A2R8VJU7	A0A2R8VJU7_MOUSE	Septin12	Septin 12								112350								16.7776	12.2035	12.1943	12.2707	12.2163	12.0989	12.1714	12.2107	16.7776	Septin12	1.09343	0.380224	0.41996	1	0	0	0
O70443	GNAZ_MOUSE	Gnaz	Guanine nucleotide-binding protein G(z) subunit alpha	15127.4	4460.23		4317.44	10186.1	13279	14520.4	15004.2	13.8849	12.1229		12.076	13.3143	13.6969	13.8258	13.8731	13.8849	12.1229	12.2707	12.076	13.3143	13.6969	13.8258	13.8731	Gnaz	1.08889	0.0527091	1.27811	4	3	1	0
Q9QXY6	EHD3_MOUSE	Ehd3	EH domain-containing protein 3	2365.46	4055.49			2942.41	5893.93	11630.7	22335.4	11.2079	11.9857			11.5228	12.525	13.5057	14.447	11.2079	11.9857	12.2707	12.2163	11.5228	12.525	13.5057	14.447	Ehd3	1.07997	0.161117	0.792859	4	2	1	0
Q9WUX5	IRAG1_MOUSE	Irag1	Inositol 1,4,5-triphosphate receptor associated 1	9287.25		12901.3		7885.34	12269.7	25451.9	20859	13.181		13.6552		12.945	13.5828	14.6355	14.3484	13.181	12.1943	13.6552	12.2163	12.945	13.5828	14.6355	14.3484	Irag1	1.06618	0.0896479	1.04746	4	2	1	0
Q80UR4	Q80UR4_MOUSE	Prss34	Mast cell protease-11	69191.3	147013	231155	102213	65097.4	823018	386662	210421	16.0783	17.1656	17.8185	16.6412	15.9903	19.6506	18.5607	17.6829	16.0783	17.1656	17.8185	16.6412	15.9903	19.6506	18.5607	17.6829	Prss34	1.04523	0.268734	0.570677	4	4	1	0
J3QNE4;F6QNN0	F6QNN0_MOUSE;J3QNE4_MOUSE	Ccdc180	Coiled-coil domain containing 180	27311.6	19221	21288.6		30483.6	32080.4	35669.5	27470	14.7372	14.2304	14.3778		14.8957	14.9694	15.1224	14.7456	14.7372	14.2304	14.3778	12.2163	14.8957	14.9694	15.1224	14.7456	Ccdc180	1.04285	0.118874	0.924913	4	3	1	0
Q9EQR6	FANCG_MOUSE	Fancg	Fanconi anemia group G protein homolog		16473.4	20020.4	28071.9	37686.9	27336.9	35905.5	21162.5		14.0079	14.2892	14.7768	15.2018	14.7386	15.1319	14.3692	12.2035	14.0079	14.2892	14.7768	15.2018	14.7386	15.1319	14.3692	Fancg	1.04102	0.13009	0.885756	4	3	1	0
Q9D6N5	NC2A_MOUSE	Drap1	Dr1-associated corepressor	83709.2	65254.7	51625.1	70760	172050	191642	208519	50179.2	16.3531	15.9938	15.6558	16.1106	17.3925	17.5481	17.6698	15.6148	16.3531	15.9938	15.6558	16.1106	17.3925	17.5481	17.6698	15.6148	Drap1	1.02795	0.0880285	1.05538	4	4	1	0
Q8VCN6	CD99_MOUSE	Cd99	CD99 antigen	11066.2	10357.4	8483.47	13218.9	10824.6	18808.1	27758.9	39267.2	13.4339	13.3384	13.0504	13.6903	13.402	14.1991	14.7607	15.261	13.4339	13.3384	13.0504	13.6903	13.402	14.1991	14.7607	15.261	Cd99	1.02745	0.0500564	1.30054	4	4	1	0
Q9D4F2	PLPP6_MOUSE	Plpp6	Polyisoprenoid diphosphate/phosphate phosphohydrolase PLPP6		35560.8	24571.3		24833.3	22240.1	32784.1	18043.3		15.118	14.5847		14.6	14.4409	15.0007	14.1392	12.2035	15.118	14.5847	12.2163	14.6	14.4409	15.0007	14.1392	Plpp6	1.01456	0.246872	0.607528	4	2	1	0
P18337	LYAM1_MOUSE	Sell	L-selectin	18691.6	16459.3	17316		19692.4	22387.4	41358.5	22595.4	14.1901	14.0066	14.0798		14.2654	14.4504	15.3359	14.4637	14.1901	14.0066	14.0798	12.2163	14.2654	14.4504	15.3359	14.4637	Sell	1.00564	0.105575	0.97644	4	3	1	0
Q8K558	TRML1_MOUSE	Treml1	Trem-like transcript 1 protein	283680	156381	191238	188161	309380	408864	402404	501239	18.1139	17.2547	17.545	17.5216	18.239	18.6413	18.6183	18.9351	18.1139	17.2547	17.545	17.5216	18.239	18.6413	18.6183	18.9351	Treml1	0.999619	0.00487451	2.31207	4	4	1	0
A0A2I3BPN6;E9QAP7	A0A2I3BPN6_MOUSE;E9QAP7_MOUSE	Taf4	TATA-box binding protein associated factor 4	58581.6	38239.4	101624	40268.6	70048	118089	170491	102277	15.8382	15.2228	16.6329	15.2974	16.0961	16.8495	17.3793	16.6421	15.8382	15.2228	16.6329	15.2974	16.0961	16.8495	17.3793	16.6421	Taf4	0.993962	0.0557065	1.25409	4	4	1	0
P15314	IRF1_MOUSE	Irf1	Interferon regulatory factor 1					19466.2			18993.2					14.2487			14.2132	12.2035	12.1943	12.2707	12.2163	14.2487	12.1714	12.2107	14.2132	Irf1	0.989762	0.144	0.841639	2	0	1	0
Q9DA03	LYRM7_MOUSE	Lyrm7	Complex III assembly factor LYRM7	4981.67	10579.5	22080.8	6271.26	19579.2	18837.9	18528.8	16535	12.2824	13.369	14.4305	12.6145	14.257	14.2014	14.1775	14.0132	12.2824	13.369	14.4305	12.6145	14.257	14.2014	14.1775	14.0132	Lyrm7	0.988165	0.0849003	1.07109	4	4	1	0
F6S6Q3	F6S6Q3_MOUSE	Rps27l	Ribosomal protein S27-like (Fragment)	1601.95		2590.3	1646.17					10.6456		11.3389	10.6849					10.6456	12.1943	11.3389	10.6849	12.0989	12.1714	12.2107	12.3248	Rps27l	0.985517	0.035881	1.44514	0	3	1	0
Q9DC47	Q9DC47_MOUSE	Zfp869	Zinc finger protein 869	16466	16614.7	18798.1	18416.1	42982.8	37615.8	42384.5	20985.7	14.0072	14.0202	14.1983	14.1687	15.3915	15.1991	15.3712	14.3571	14.0072	14.0202	14.1983	14.1687	15.3915	15.1991	15.3712	14.3571	Zfp869	0.981134	0.00771297	2.11278	4	4	1	0
E9QA15	E9QA15_MOUSE	Cald1	Caldesmon 1	26201.9	21828	28693	26369.2	34257.7	50784.8	62137.3	60637.1	14.6774	14.4139	14.8084	14.6866	15.0641	15.6321	15.9232	15.8879	14.6774	14.4139	14.8084	14.6866	15.0641	15.6321	15.9232	15.8879	Cald1	0.98027	0.00386695	2.41263	4	4	1	0
Q8VED9	LEGL_MOUSE	Lgalsl	Galectin-related protein							15446.1	24872.9							13.915	14.6023	12.2035	12.1943	12.2707	12.2163	12.0989	12.1714	13.915	14.6023	Lgalsl	0.97565	0.172005	0.764459	2	0	1	0
Q8BTZ5	ANR46_MOUSE	Ankrd46	Ankyrin repeat domain-containing protein 46	23509.4	17147.2	6413.83	13544.6	26836.3	28165.1	25780.1	26781.8	14.521	14.0657	12.647	13.7254	14.7119	14.7816	14.654	14.709	14.521	14.0657	12.647	13.7254	14.7119	14.7816	14.654	14.709	Ankrd46	0.974355	0.0507146	1.29487	4	4	1	0
Q9QUM4	SLAF1_MOUSE	Slamf1	Signaling lymphocytic activation molecule	18204.9	10124.6	21205.6	10155.6	14023.3	29736.2	40271.6	35138.4	14.152	13.3056	14.3722	13.31	13.7755	14.8599	15.2975	15.1008	14.152	13.3056	14.3722	13.31	13.7755	14.8599	15.2975	15.1008	Slamf1	0.973486	0.0687232	1.1629	4	4	1	0
Q8VHJ5	MARK1_MOUSE	Mark1	Serine/threonine-protein kinase MARK1	22867.4	29121.3			14537.8	19107.3	27916.6	29680.7	14.481	14.8298			13.8275	14.2218	14.7688	14.8572	14.481	14.8298	12.2707	12.2163	13.8275	14.2218	14.7688	14.8572	Mark1	0.969398	0.238474	0.62256	4	2	1	0
O08675	PAR3_MOUSE	F2rl2	Proteinase-activated receptor 3	5160.37	1737.86	6076.6	3740.15	4277.12	6829.95	9620.71	10492	12.3333	10.7631	12.569	11.8689	12.0624	12.7377	13.2319	13.357	12.3333	10.7631	12.569	11.8689	12.0624	12.7377	13.2319	13.357	F2rl2	0.963682	0.100557	0.997589	4	4	1	0
Q9DAY5	CF120_MOUSE		UPF0669 protein C6orf120 homolog	12080.7		22553.9		11467.2	19983.6	25532.5	14987.8	13.5604		14.4611		13.4852	14.2865	14.64	13.8715	13.5604	12.1943	14.4611	12.2163	13.4852	14.2865	14.64	13.8715		0.962788	0.163691	0.785975	4	2	1	0
O88947	FA10_MOUSE	F10	Coagulation factor X	31819.6	32161.4	36358.7	42782.9	54455.4	64942	66330.4	96416.5	14.9576	14.973	15.15	15.3847	15.7328	15.9869	16.0174	16.557	14.9576	14.973	15.15	15.3847	15.7328	15.9869	16.0174	16.557	F10	0.957149	0.0030356	2.51776	4	4	1	0
P61953	GBG11_MOUSE	Gng11	Guanine nucleotide-binding protein G(I)/G(S)/G(O) subunit gamma-11	10435.2	7803.99	13834.1			18362.6	33122.6	28323.4	13.3492	12.93	13.7559			14.1645	15.0155	14.7897	13.3492	12.93	13.7559	12.2163	12.0989	14.1645	15.0155	14.7897	Gng11	0.954302	0.245316	0.610274	3	3	1	0
Q05117	PPA5_MOUSE	Acp5	Tartrate-resistant acid phosphatase type 5	35677.8	29110.5	28305.7	57882.7	46207.5	66106.7	133627	58385.4	15.1227	14.8293	14.7888	15.8208	15.4958	16.0125	17.0279	15.8333	15.1227	14.8293	14.7888	15.8208	15.4958	16.0125	17.0279	15.8333	Acp5	0.95197	0.0579433	1.237	4	4	1	0
P36423	THAS_MOUSE	Tbxas1	Thromboxane-A synthase	27304.7	14664.4	20396.4	21372.4	24264.4	39917.8	61216.1	40868.2	14.7369	13.84	14.316	14.3835	14.5666	15.2847	15.9016	15.3187	14.7369	13.84	14.316	14.3835	14.5666	15.2847	15.9016	15.3187	Tbxas1	0.948808	0.0281435	1.55062	4	4	1	0
A0A286YDL6	A0A286YDL6_MOUSE	Camk2g	Calcium/calmodulin-dependent protein kinase II gamma (Fragment)	33748.3	37738.3		45440	38483.4	43716.3	54394.1	42302.5	15.0425	15.2037		15.4717	15.2319	15.4159	15.7312	15.3685	15.0425	15.2037	12.2707	15.4717	15.2319	15.4159	15.7312	15.3685	Camk2g	0.939692	0.259578	0.585732	4	3	1	0
Q9CWG9	BL1S2_MOUSE	Bloc1s2	Biogenesis of lysosome-related organelles complex 1 subunit 2	43286.5			63377.5	47746.5	61173.3	56895.4		15.4016			15.9517	15.5431	15.9006	15.796		15.4016	12.1943	12.2707	15.9517	15.5431	15.9006	15.796	12.3248	Bloc1s2	0.936549	0.504205	0.297393	3	2	1	0
A4UUI3	GBP4_MOUSE	Gbp4	Guanylate-binding protein 4						17440.8	15492.6	5882.57						14.0902	13.9193	12.5222	12.2035	12.1943	12.2707	12.2163	12.0989	14.0902	13.9193	12.5222	Gbp4	0.936427	0.109187	0.961829	3	0	1	0
Q61586	GPAT1_MOUSE	Gpam	Glycerol-3-phosphate acyltransferase 1, mitochondrial	5722.46	6368.61	6805.36	4856.52	9015.93	8056.31	20583.8	10713.7	12.4824	12.6368	12.7325	12.2457	13.1383	12.9759	14.3292	13.3872	12.4824	12.6368	12.7325	12.2457	13.1383	12.9759	14.3292	13.3872	Gpam	0.933302	0.0269673	1.56916	4	4	1	0
P40240	CD9_MOUSE	Cd9	CD9 antigen			22160.2	26974.1		27130.5	38547.5	38073.6			14.4357	14.7193		14.7276	15.2343	15.2165	12.2035	12.1943	14.4357	14.7193	12.0989	14.7276	15.2343	15.2165	Cd9	0.931141	0.395651	0.402688	3	2	1	0
Q8BZ47	ZN609_MOUSE	Znf609	Zinc finger protein 609	24705.1	29890.2	3568.89	19451.5	32842.7	28925.3	28071.3	25409.3	14.5925	14.8674	11.8013	14.2476	15.0033	14.82	14.7768	14.6331	14.5925	14.8674	11.8013	14.2476	15.0033	14.82	14.7768	14.6331	Znf609	0.931112	0.236267	0.626596	4	4	1	0
P56400	GP1BB_MOUSE	Gp1bb	Platelet glycoprotein Ib beta chain	154202	83306.8	147411	79206.8	135979	221043	242824	269845	17.2345	16.3461	17.1695	16.2733	17.053	17.754	17.8896	18.0418	17.2345	16.3461	17.1695	16.2733	17.053	17.754	17.8896	18.0418	Gp1bb	0.928721	0.0335348	1.4745	4	4	1	0
Q4FJU9	TMM40_MOUSE	Tmem40	Transmembrane protein 40	26811.6	19661.7	26617.2	27347.8	33770.3	40614.1	55987.6	65390	14.7106	14.2631	14.7001	14.7391	15.0435	15.3097	15.7728	15.9968	14.7106	14.2631	14.7001	14.7391	15.0435	15.3097	15.7728	15.9968	Tmem40	0.927471	0.00903213	2.04421	4	4	1	0
O35930	GP1BA_MOUSE	Gp1ba	Platelet glycoprotein Ib alpha chain	9143.92	7221.53	6260.65	7089.74	9768.77	14744.6	9420.58	27570.9	13.1586	12.8181	12.6121	12.7915	13.254	13.8479	13.2016	14.7509	13.1586	12.8181	12.6121	12.7915	13.254	13.8479	13.2016	14.7509	Gp1ba	0.918505	0.0511159	1.29144	4	4	1	0
Q8VIK5	PEAR1_MOUSE	Pear1	Platelet endothelial aggregation receptor 1	11823.1	6090.69	10578	5330.38	9938.48	16085.2	13561.4	23852.4	13.5293	12.5724	13.3688	12.38	13.2788	13.9734	13.7272	14.5418	13.5293	12.5724	13.3688	12.38	13.2788	13.9734	13.7272	14.5418	Pear1	0.917702	0.0560263	1.25161	4	4	1	0
Q76N33	STALP_MOUSE	Stambpl1	AMSH-like protease		24318.3		16758.4	22618.2	20590.1	13889.7	18441.5		14.5698		14.0326	14.4652	14.3297	13.7617	14.1707	12.2035	14.5698	12.2707	14.0326	14.4652	14.3297	13.7617	14.1707	Stambpl1	0.912661	0.194437	0.711221	4	2	1	0
Q8BRH0	TMTC3_MOUSE	Tmtc3	Protein O-mannosyl-transferase TMTC3	12570.1	11901.6	17063.6	11405.3	16874.5	22758	30111.7	31395.9	13.6177	13.5389	14.0586	13.4774	14.0426	14.4741	14.878	14.9383	13.6177	13.5389	14.0586	13.4774	14.0426	14.4741	14.878	14.9383	Tmtc3	0.910085	0.0100647	1.9972	4	4	1	0
Q99P58	RB27B_MOUSE	Rab27b	Ras-related protein Rab-27B	70321.5	41939	60808.8	47412.6	95967.4	144270	73812.9	102854	16.1017	15.356	15.892	15.533	16.5503	17.1384	16.1716	16.6502	16.1017	15.356	15.892	15.533	16.5503	17.1384	16.1716	16.6502	Rab27b	0.906958	0.0132461	1.87791	4	4	1	0
Q9Z1R4	CF047_MOUSE	D17h6s53e	Uncharacterized protein C6orf47 homolog		68182.8	45840.5	25442.5	54657.6	38152.8	46917.9	46850.7		16.0571	15.4843	14.635	15.7381	15.2195	15.5179	15.5158	12.2035	16.0571	15.4843	14.635	15.7381	15.2195	15.5179	15.5158	D17h6s53e	0.902834	0.331976	0.478893	4	3	1	0
P12388	PAI2_MOUSE	Serpinb2	Plasminogen activator inhibitor 2, macrophage			7149.33			8536.12	13322.2	18196.5			12.8036			13.0594	13.7015	14.1514	12.2035	12.1943	12.8036	12.2163	12.0989	13.0594	13.7015	14.1514	Serpinb2	0.898358	0.104302	0.981709	3	1	1	0
Q61647	HYAS1_MOUSE	Has1	Hyaluronan synthase 1	68537.5	37067	23022.9	40766.2	110100	90009.5	52401.7	53970.6	16.0646	15.1778	14.4908	15.3151	16.7485	16.4578	15.6773	15.7199	16.0646	15.1778	14.4908	15.3151	16.7485	16.4578	15.6773	15.7199	Has1	0.888784	0.0783394	1.10602	4	4	1	0
Q9JKM7	RAB37_MOUSE	Rab37	Ras-related protein Rab-37	26632	29220.1	38744.3	15302.1	23753.9	45049.1	69555	72040.2	14.7009	14.8347	15.2417	13.9014	14.5359	15.4592	16.0859	16.1365	14.7009	14.8347	15.2417	13.9014	14.5359	15.4592	16.0859	16.1365	Rab37	0.884696	0.106794	0.971452	4	4	1	0
A2AF67	A2AF67_MOUSE	Dock11	Dedicator of cytokinesis 11			7406.94	14033.2	15173.6	13324	10661.5	12332			12.8547	13.7766	13.8893	13.7017	13.3801	13.5901	12.2035	12.1943	12.8547	13.7766	13.8893	13.7017	13.3801	13.5901	Dock11	0.883045	0.0632319	1.19906	4	2	1	0
P43430	MCPT8_MOUSE	Mcpt8	Mast cell protease 8	22470	42133.5	66181.1	31820.9	18833.1	190273	105431	60597.1	14.4557	15.3627	16.0141	14.9577	14.201	17.5377	16.6859	15.887	14.4557	15.3627	16.0141	14.9577	14.201	17.5377	16.6859	15.887	Mcpt8	0.880346	0.303981	0.517154	4	4	1	0
Q9QZK7	DOK3_MOUSE	Dok3	Docking protein 3	237160	201039	102133	182294	375434	407989	346506	191354	17.8555	17.6171	16.6401	17.4759	18.5182	18.6382	18.4025	17.5459	17.8555	17.6171	16.6401	17.4759	18.5182	18.6382	18.4025	17.5459	Dok3	0.87904	0.0515074	1.28813	4	4	1	0
Q6RT24	CENPE_MOUSE	Cenpe	Centromere-associated protein E	96371.4	46974.3	34320.8	37593.3	94642.2	97680.7	75369.1	95527.4	16.5563	15.5196	15.0668	15.1982	16.5302	16.5758	16.2017	16.5436	16.5563	15.5196	15.0668	15.1982	16.5302	16.5758	16.2017	16.5436	Cenpe	0.877602	0.0454217	1.34274	4	4	1	0
P83510	TNIK_MOUSE	Tnik	Traf2 and NCK-interacting protein kinase					8173.51	7217.01	11192.6	8962.78					12.9967	12.8172	13.4503	13.1297	12.2035	12.1943	12.2707	12.2163	12.9967	12.8172	13.4503	13.1297	Tnik	0.877252	0.000624587	3.20441	4	0	1	0
Q9ERI6	RDH14_MOUSE	Rdh14	Retinol dehydrogenase 14	28566	24726.4	29672.1	16764.9	25636	39389.1	59234.9	66709.1	14.802	14.5938	14.8568	14.0332	14.6459	15.2655	15.8542	16.0256	14.802	14.5938	14.8568	14.0332	14.6459	15.2655	15.8542	16.0256	Rdh14	0.876349	0.0533033	1.27325	4	4	1	0
Q9QZ39	SIA7A_MOUSE	St6galnac1	Alpha-N-acetylgalactosaminide alpha-2,6-sialyltransferase 1					52475.4								15.6794				12.2035	12.1943	12.2707	12.2163	15.6794	12.1714	12.2107	12.3248	St6galnac1	0.875339	0.348917	0.457277	1	0	0	0
Q9D3J9	TASL_MOUSE	Tasl	TLR adapter interacting with SLC15A4 on the lysosome	23221.4	17264.7	11952.1	17312.2	37403.6	41044.1	34170.3	17843.3	14.5032	14.0755	13.545	14.0795	15.1909	15.3249	15.0605	14.1231	14.5032	14.0755	13.545	14.0795	15.1909	15.3249	15.0605	14.1231	Tasl	0.874036	0.0405489	1.39202	4	4	1	0
P23927	CRYAB_MOUSE	Cryab	Alpha-crystallin B chain	57206.1	22957.3	20770.3	21303.5	132625	37199.4	91091.4	14586.4	15.8039	14.4867	14.3422	14.3788	17.017	15.183	16.475	13.8323	15.8039	14.4867	14.3422	14.3788	17.017	15.183	16.475	13.8323	Cryab	0.873941	0.312871	0.504635	4	4	1	0
P21300	ALD1_MOUSE	Akr1b7	Aldo-keto reductase family 1 member B7			10493.9			15916	11713.2	15221.2			13.3573			13.9582	13.5158	13.8938	12.2035	12.1943	13.3573	12.2163	12.0989	13.9582	13.5158	13.8938	Akr1b7	0.873828	0.14433	0.840643	3	1	1	0
Q62384	ZPR1_MOUSE	Zpr1	Zinc finger protein ZPR1	48902.8	33604.7	31769.3	38303.2	37142.5	73265.6	75241.4	110048	15.5776	15.0364	14.9553	15.2252	15.1808	16.1608	16.1992	16.7478	15.5776	15.0364	14.9553	15.2252	15.1808	16.1608	16.1992	16.7478	Zpr1	0.873529	0.0486748	1.3127	4	4	1	0
A2AJK6	CHD7_MOUSE	Chd7	Chromodomain-helicase-DNA-binding protein 7	13880.2		21250.4	15985.8	20911	19021.8	23625	26420.7	13.7607		14.3752	13.9645	14.352	14.2154	14.528	14.6894	13.7607	12.1943	14.3752	13.9645	14.352	14.2154	14.528	14.6894	Chd7	0.872492	0.124177	0.905958	4	3	1	0
Q62469	ITA2_MOUSE	Itga2	Integrin alpha-2	53500.2	34418.1	60819.2	25983.3	52580.6	79016.9	81050.8	96672.6	15.7073	15.0709	15.8922	14.6653	15.6822	16.2699	16.3065	16.5608	15.7073	15.0709	15.8922	14.6653	15.6822	16.2699	16.3065	16.5608	Itga2	0.870951	0.0425253	1.37135	4	4	1	0
Q4VAD2	Q4VAD2_MOUSE	Pramel27	PRAME like 27		10141.5		7988.95	15265.3	16910.7		17208.1		13.308		12.9638	13.898	14.0456		14.0708	12.2035	13.308	12.2707	12.9638	13.898	14.0456	12.2107	14.0708	Pramel27	0.869777	0.148307	0.828838	3	2	1	0
O35623	BET1_MOUSE	Bet1	BET1 homolog	74445.1	68227.8	71574.7	68252.5	109375	159518	129961	121574	16.1839	16.0581	16.1272	16.0586	16.7389	17.2834	16.9877	16.8915	16.1839	16.0581	16.1272	16.0586	16.7389	17.2834	16.9877	16.8915	Bet1	0.86844	0.000332529	3.47817	4	4	1	0
Q8C6U2	S66A3_MOUSE	Slc66a3	Solute carrier family 66 member 3	9143.97	6880.23	6833.01		12765	9393.56	10269.4	18428.9	13.1586	12.7482	12.7383		13.6399	13.1975	13.3261	14.1697	13.1586	12.7482	12.7383	12.2163	13.6399	13.1975	13.3261	14.1697	Slc66a3	0.867911	0.0242333	1.61559	4	3	1	0
E9QAD4	E9QAD4_MOUSE	Ccdc93	Coiled-coil domain-containing protein 93					9556.21	6404.14	8220.13	11415.1					13.2222	12.6448	13.0049	13.4787	12.2035	12.1943	12.2707	12.2163	13.2222	12.6448	13.0049	13.4787	Ccdc93	0.866427	0.00275181	2.56038	4	0	1	0
Q9Z0X4	PDE3A_MOUSE	Pde3a	cGMP-inhibited 3',5'-cyclic phosphodiesterase 3A		1502	2320.63	1916.42	2320.38	4663.46	6475.58	4833.25		10.5527	11.1803	10.9042	11.1801	12.1872	12.6608	12.2388	12.2035	10.5527	11.1803	10.9042	11.1801	12.1872	12.6608	12.2388	Pde3a	0.856552	0.120792	0.91796	4	3	1	0
Q9D338	RM19_MOUSE	Mrpl19	Large ribosomal subunit protein bL19m	15624.5		17509.9	16873.2	15792.1	20549.8	26270.6	27158.2	13.9315		14.0959	14.0424	13.9469	14.3268	14.6812	14.7291	13.9315	12.1943	14.0959	14.0424	13.9469	14.3268	14.6812	14.7291	Mrpl19	0.854957	0.133716	0.873818	4	3	1	0
A0A494BBJ5	A0A494BBJ5_MOUSE	Malt1	MALT1 paracaspase	24809.8	28862.7	22141.5	30137.5	42973.4	45603.4	53552	48007.5	14.5986	14.8169	14.4345	14.8793	15.3912	15.4769	15.7087	15.551	14.5986	14.8169	14.4345	14.8793	15.3912	15.4769	15.7087	15.551	Malt1	0.849589	0.000443386	3.35322	4	4	1	0
Q2TBA3	MALT1_MOUSE	Malt1	Mucosa-associated lymphoid tissue lymphoma translocation protein 1 homolog	76931.7	33920.8	29735.2	31467.8	39375.4	78473.1	97751.2	84682.5	16.2313	15.0499	14.8599	14.9416	15.265	16.2599	16.5768	16.3698	16.2313	15.0499	14.8599	14.9416	15.265	16.2599	16.5768	16.3698	Malt1	0.847219	0.0993572	1.0028	4	4	1	0
Q921I0	ORML1_MOUSE	Ormdl1	ORM1-like protein 1	24479.3	20838.4		16735.3	28461.7	29363.3	16818.7	30994.8	14.5793	14.347		14.0306	14.7967	14.8417	14.0378	14.9197	14.5793	14.347	12.2707	14.0306	14.7967	14.8417	14.0378	14.9197	Ormdl1	0.842101	0.185369	0.731964	4	3	1	0
E9PWZ3	RL3L_MOUSE	Rpl3l	Large ribosomal subunit protein uL3-like	43618.3	38774.5	13516.2	13012.4	38660.6	43409.6	43132.4	41932.8	15.4126	15.2428	13.7224	13.6676	15.2386	15.4057	15.3965	15.3558	15.4126	15.2428	13.7224	13.6676	15.2386	15.4057	15.3965	15.3558	Rpl3l	0.837778	0.127764	0.893591	4	4	1	0
Q9D4G2	HSF2B_MOUSE	Hsf2bp	Heat shock factor 2-binding protein							51056.6								15.6398		12.2035	12.1943	12.2707	12.2163	12.0989	12.1714	15.6398	12.3248	Hsf2bp	0.837499	0.36869	0.433339	1	0	0	0
O88188	LY86_MOUSE	Ly86	Lymphocyte antigen 86	8795.79	8526.77	12197.6	11441.2	20463.5	13092.7	24792.6	15999.7	13.1026	13.0578	13.5743	13.482	14.3208	13.6765	14.5976	13.9658	13.1026	13.0578	13.5743	13.482	14.3208	13.6765	14.5976	13.9658	Ly86	0.835994	0.0131712	1.88037	4	4	1	0
A2AHC3	CAMP1_MOUSE	Camsap1	Calmodulin-regulated spectrin-associated protein 1		25941.7			11852.5	26902.4	17674.9			14.663			13.5329	14.7154	14.1094		12.2035	14.663	12.2707	12.2163	13.5329	14.7154	14.1094	12.3248	Camsap1	0.83226	0.334649	0.475411	3	1	1	0
O88186	GPIX_MOUSE	Gp9	Platelet glycoprotein IX	56015.6	37912.5	71328.3	38348.5	41014.9	84147.6	100850	166745	15.7735	15.2104	16.1222	15.2269	15.3239	16.3606	16.6219	17.3473	15.7735	15.2104	16.1222	15.2269	15.3239	16.3606	16.6219	17.3473	Gp9	0.830159	0.13056	0.884191	4	4	1	0
Q66JV4	R12BB_MOUSE	Rbm12b2	RNA-binding protein 12B-B	35653.7	54745	23641.1	26010.2	62398	66962.6	62812.2	45258.6	15.1218	15.7404	14.529	14.6668	15.9292	16.0311	15.9388	15.4659	15.1218	15.7404	14.529	14.6668	15.9292	16.0311	15.9388	15.4659	Rbm12b2	0.826735	0.0335553	1.47424	4	4	1	0
E9Q8T2	PRD15_MOUSE	Prdm15	PR domain zinc finger protein 15	12110.6			16579.2	14384.4	17061.7	16821.3	11085.6	13.564			14.0171	13.8122	14.0585	14.038	13.4364	13.564	12.1943	12.2707	14.0171	13.8122	14.0585	14.038	13.4364	Prdm15	0.824738	0.137657	0.861203	4	2	1	0
Q6PB97	FXL19_MOUSE	Fbxl19	F-box/LRR-repeat protein 19	8172.64	5779.31	5176.35		6603.47	9854.66	11704.9	14872.6	12.9966	12.4967	12.3377		12.689	13.2666	13.5148	13.8604	12.9966	12.4967	12.3377	12.2163	12.689	13.2666	13.5148	13.8604	Fbxl19	0.820873	0.0340851	1.46744	4	3	1	0
Q8QZS3	FLCN_MOUSE	Flcn	Folliculin	38928.8	29777.5	37796.3	16030.6	45008.5	59932.4	52092.2	48413.4	15.2486	14.8619	15.206	13.9685	15.4579	15.871	15.6688	15.5631	15.2486	14.8619	15.206	13.9685	15.4579	15.871	15.6688	15.5631	Flcn	0.818968	0.0384126	1.41553	4	4	1	0
Q5NCI0	URGCP_MOUSE	Urgcp	Up-regulator of cell proliferation	4720.75	8283.53	7737.52	7116.2	9097.01	10652.4	14031.1	15335	12.2048	13.016	12.9177	12.7969	13.1512	13.3789	13.7763	13.9045	12.2048	13.016	12.9177	12.7969	13.1512	13.3789	13.7763	13.9045	Urgcp	0.818893	0.0174975	1.75702	4	4	1	0
Q8R3R8	GBRL1_MOUSE	Gabarapl1	Gamma-aminobutyric acid receptor-associated protein-like 1	25520.5	13513.9	20291.2	13921.7	24287.7	27378.6	38716.5	36599.6	14.6394	13.7222	14.3086	13.765	14.5679	14.7408	15.2407	15.1595	14.6394	13.7222	14.3086	13.765	14.5679	14.7408	15.2407	15.1595	Gabarapl1	0.81844	0.0246357	1.60843	4	4	1	0
Q99K46	UBP11_MOUSE	Usp11	Ubiquitin carboxyl-terminal hydrolase 11	3356.32		5520.4	5267.85		6124.19	11407.6	14434	11.7127		12.4306	12.363		12.5803	13.4777	13.8172	11.7127	12.1943	12.4306	12.363	12.0989	12.5803	13.4777	13.8172	Usp11	0.818388	0.104432	0.981166	3	3	1	0
Q8K3Z9	PO121_MOUSE	Pom121	Nuclear envelope pore membrane protein POM 121	73090.5	68391.3	65790.2	61626.6	132558	113523	165804	78402.6	16.1574	16.0615	16.0056	15.9113	17.0163	16.7926	17.3391	16.2586	16.1574	16.0615	16.0056	15.9113	17.0163	16.7926	17.3391	16.2586	Pom121	0.817713	0.0126911	1.8965	4	4	1	0
O88792	JAM1_MOUSE	F11r	Junctional adhesion molecule A	11340.1		7792.27		7132.67	13201.4	11895	16830.9	13.4691		12.9278		12.8002	13.6884	13.5381	14.0388	13.4691	12.1943	12.9278	12.2163	12.8002	13.6884	13.5381	14.0388	F11r	0.814476	0.089779	1.04683	4	2	1	0
Q9Z248	AEBP2_MOUSE	Aebp2	Zinc finger protein AEBP2	16134.8		26055.3		21464.7	22763.6	35774.4		13.9779		14.6693		14.3897	14.4744	15.1266		13.9779	12.1943	14.6693	12.2163	14.3897	14.4744	15.1266	12.3248	Aebp2	0.814442	0.387065	0.412216	3	2	1	0
A0A2R8VJY1;A0A2R8VKF0	A0A2R8VJY1_MOUSE;A0A2R8VKF0_MOUSE	Pcbp2	Poly(rC) binding protein 2 (Fragment)	57939.2	66478.8	105310		57871.2	45295.4	58700.4	118782	15.8223	16.0206	16.6843		15.8206	15.4671	15.8411	16.858	15.8223	16.0206	16.6843	12.2163	15.8206	15.4671	15.8411	16.858	Pcbp2	0.810805	0.469517	0.328348	4	3	1	0
Q91VN4	MIC25_MOUSE	Chchd6	MICOS complex subunit Mic25	57910.8	51370.4	56846.6	54945.8	57721.4	75777.6	129160	154607	15.8215	15.6486	15.7948	15.7457	15.8168	16.2095	16.9788	17.2382	15.8215	15.6486	15.7948	15.7457	15.8168	16.2095	16.9788	17.2382	Chchd6	0.808161	0.0512062	1.29068	4	4	1	0
Q61508	ECM1_MOUSE	Ecm1	Extracellular matrix protein 1	13228.1	9233.11	8850.06	11834.4	18612.2	20050.4	15764.6	20339.3	13.6913	13.1726	13.1115	13.5307	14.184	14.2913	13.9444	14.312	13.6913	13.1726	13.1115	13.5307	14.184	14.2913	13.9444	14.312	Ecm1	0.8064	0.00260888	2.58355	4	4	1	0
Q8CG19	LTBP1_MOUSE	Ltbp1	Latent-transforming growth factor beta-binding protein 1	58176.4	42716	81791.3	44803.4	63924.1	94625	122112	115196	15.8281	15.3825	16.3197	15.4513	15.9641	16.5299	16.8978	16.8137	15.8281	15.3825	16.3197	15.4513	15.9641	16.5299	16.8978	16.8137	Ltbp1	0.805992	0.0367592	1.43463	4	4	1	0
Q9QUM0	ITA2B_MOUSE	Itga2b	Integrin alpha-IIb	386392	202056	338438	212765	321307	480783	570700	592389	18.5597	17.6244	18.3685	17.6989	18.2936	18.875	19.1224	19.1762	18.5597	17.6244	18.3685	17.6989	18.2936	18.875	19.1224	19.1762	Itga2b	0.803911	0.0411235	1.38591	4	4	1	0
Q8K1E6	ALKB3_MOUSE	Alkbh3	Alpha-ketoglutarate-dependent dioxygenase alkB homolog 3	13038.1	5764.54			18625.2	10373	8284.55	10251.8	13.6704	12.493			14.185	13.3405	13.0162	13.3236	13.6704	12.493	12.2707	12.2163	14.185	13.3405	13.0162	13.3236	Alkbh3	0.803707	0.106516	0.972586	4	2	1	0
Q6PAM0	AAKB2_MOUSE	Prkab2	5'-AMP-activated protein kinase subunit beta-2	7198.57		10546.9	14043.4	17322.6	12980.3	12235.5	16798.6	12.8135		13.3645	13.7776	14.0804	13.664	13.5788	14.0361	12.8135	12.1943	13.3645	13.7776	14.0804	13.664	13.5788	14.0361	Prkab2	0.80232	0.0711162	1.14803	4	3	1	0
O08688	CAN5_MOUSE	Capn5	Calpain-5	7147.05		6921.94		5270	10011.8	14343.6	13437.1	12.8031		12.757		12.3636	13.2894	13.8081	13.7139	12.8031	12.1943	12.757	12.2163	12.3636	13.2894	13.8081	13.7139	Capn5	0.801079	0.0732364	1.13527	4	2	1	0
Q62077	PLCG1_MOUSE	Plcg1	1-phosphatidylinositol 4,5-bisphosphate phosphodiesterase gamma-1	19033.9		18182.6	14533.1	28428	21301.3	26009.8	13784.6	14.2163		14.1503	13.8271	14.795	14.3787	14.6668	13.7508	14.2163	12.1943	14.1503	13.8271	14.795	14.3787	14.6668	13.7508	Plcg1	0.800819	0.180897	0.742569	4	3	1	0
Q8BHG2	CZIB_MOUSE	Czib	CXXC motif containing zinc binding protein	46978.6	49179.1	70620.9	61697.2	75230.6	77786.8	93753.8	168859	15.5197	15.5858	16.1078	15.9129	16.199	16.2472	16.5166	17.3655	15.5197	15.5858	16.1078	15.9129	16.199	16.2472	16.5166	17.3655	Czib	0.80053	0.0387886	1.4113	4	4	1	0
Q7TSA3	BTLA_MOUSE	Btla	B- and T-lymphocyte attenuator	10260	10561.2	6839.27	8705.69	14290.4	20146.3	13754.9	14924.7	13.3247	13.3665	12.7396	13.0877	13.8028	14.2982	13.7477	13.8654	13.3247	13.3665	12.7396	13.0877	13.8028	14.2982	13.7477	13.8654	Btla	0.798865	0.00578013	2.23806	4	4	1	0
A0A7N9VSG0	AFG2B_MOUSE	Afg2b	ATPase family gene 2 protein homolog B	655.256	1353.96	1421.1	1856.33	1017.21			962.062	9.35591	10.403	10.4728	10.8582	9.9904			9.90999	9.35591	10.403	10.4728	10.8582	9.9904	12.1714	12.2107	9.90999	Afg2b	0.798137	0.311673	0.506301	2	4	1	0
E9PYK3	PARP4_MOUSE	Parp4	Protein mono-ADP-ribosyltransferase PARP4	49918.4	43953.5	44139.9	48082.8	87995.6	70729.1	103849	65766.9	15.6073	15.4237	15.4298	15.5532	16.4251	16.11	16.6641	16.0051	15.6073	15.4237	15.4298	15.5532	16.4251	16.11	16.6641	16.0051	Parp4	0.79759	0.00227623	2.64278	4	4	1	0
Q8BTV1	TUSC3_MOUSE	Tusc3	Tumor suppressor candidate 3	31607.8		23361.2	30033	29117.4	29399	35135.5	31505.9	14.948		14.5118	14.8743	14.8296	14.8435	15.1006	14.9433	14.948	12.1943	14.5118	14.8743	14.8296	14.8435	15.1006	14.9433	Tusc3	0.797159	0.269876	0.568836	4	3	1	0
Q7TQC7	GPTC2_MOUSE	Gpatch2	G patch domain-containing protein 2			9974.96		10082.9	12279.7	7438.82	10275.6			13.2841		13.2996	13.584	12.8609	13.3269	12.2035	12.1943	13.2841	12.2163	13.2996	13.584	12.8609	13.3269	Gpatch2	0.793285	0.0423849	1.37279	4	1	1	0
P17879;Q61696	HS71A_MOUSE;HS71B_MOUSE	Hspa1a;Hspa1b	Heat shock 70 kDa protein 1B	143118	122039	79424.3	120766	178912	191253	219182	200101	17.1268	16.897	16.2773	16.8819	17.4489	17.5451	17.7418	17.6104	17.1268	16.897	16.2773	16.8819	17.4489	17.5451	17.7418	17.6104	Hspa1a;Hspa1b	0.790794	0.00619412	2.20802	4	4	1	0
Q8R3W2	Q8R3W2_MOUSE	Trappc2b	Trafficking protein particle complex 2B	12871.3	15165.5	8030.98	14613.4	26600	24380.7	16827.5	18746.1	13.6519	13.8885	12.9714	13.835	14.6991	14.5735	14.0385	14.1943	13.6519	13.8885	12.9714	13.835	14.6991	14.5735	14.0385	14.1943	Trappc2b	0.789672	0.023701	1.62523	4	4	1	0
P01029	CO4B_MOUSE	C4b	Complement C4-B	9251.56		10978.5		13568.1		19579.8	16215.6	13.1755		13.4224		13.7279		14.2571	13.9851	13.1755	12.1943	13.4224	12.2163	13.7279	12.1714	14.2571	13.9851	C4b	0.783234	0.215863	0.665821	3	2	1	0
Q8BZ21	KAT6A_MOUSE	Kat6a	Histone acetyltransferase KAT6A	29357	29978.6	32196.8	29720.7	61206	66641.3	65101.1	27619.4	14.8414	14.8716	14.9746	14.8592	15.9014	16.0241	15.9904	14.7534	14.8414	14.8716	14.9746	14.8592	15.9014	16.0241	15.9904	14.7534	Kat6a	0.780608	0.0440218	1.35633	4	4	1	0
G5E8T3;Q9D104	G5E8T3_MOUSE;Q9D104_MOUSE	Srp19	Signal recognition particle 19 kDa protein	24859.5	24257.1	20826.3	21859.3	51403.8	39750.3	28005.1	41611.2	14.6015	14.5661	14.3461	14.416	15.6496	15.2787	14.7734	15.3447	14.6015	14.5661	14.3461	14.416	15.6496	15.2787	14.7734	15.3447	Srp19	0.779161	0.00659155	2.18101	4	4	1	0
O70378	EMC8_MOUSE	Emc8	ER membrane protein complex subunit 8	107860	113832	116375	120693	153945	218375	212855	208203	16.7188	16.7965	16.8284	16.881	17.2321	17.7364	17.6995	17.6676	16.7188	16.7965	16.8284	16.881	17.2321	17.7364	17.6995	17.6676	Emc8	0.777724	0.000728224	3.13773	4	4	1	0
Q9QX15	CA3A1_MOUSE	Clca3a1	Calcium-activated chloride channel regulator 3A-1	14692.5	7888.41	11475.2	10992.9	14142.1	16436.5	19551.2	27777.1	13.8428	12.9455	13.4862	13.4243	13.7877	14.0046	14.255	14.7616	13.8428	12.9455	13.4862	13.4243	13.7877	14.0046	14.255	14.7616	Clca3a1	0.777519	0.031753	1.49821	4	4	1	0
Q8K0G5	EIPR1_MOUSE	Eipr1	EARP and GARP complex-interacting protein 1	28720.8	21462.1	77871.8	20510	54659.8	55014.5	45211.3	62000.1	14.8098	14.3895	16.2488	14.324	15.7382	15.7475	15.4644	15.92	14.8098	14.3895	16.2488	14.324	15.7382	15.7475	15.4644	15.92	Eipr1	0.774483	0.141892	0.848042	4	4	1	0
Q60598	SRC8_MOUSE	Cttn	Src substrate cortactin	49081.8	37245.4	65494.3	46042.3	55009.6	79213.5	146509	73580.3	15.5829	15.1848	15.9991	15.4907	15.7474	16.2735	17.1606	16.167	15.5829	15.1848	15.9991	15.4907	15.7474	16.2735	17.1606	16.167	Cttn	0.772772	0.0641724	1.19265	4	4	1	0
Q9JLZ3	AUHM_MOUSE	Auh	Methylglutaconyl-CoA hydratase, mitochondrial	49925.3	22950	36799.7	34230.3	43443.3	79299.1	53139.4	66766.1	15.6075	14.4862	15.1674	15.063	15.4068	16.275	15.6975	16.0268	15.6075	14.4862	15.1674	15.063	15.4068	16.275	15.6975	16.0268	Auh	0.770526	0.0417674	1.37916	4	4	1	0
P70257	NFIX_MOUSE	Nfix	Nuclear factor 1 X-type	21220.9	16981.3	18954.9	20754.5	15361.2	43339	52435.1	34360.7	14.3732	14.0517	14.2103	14.3411	13.907	15.4034	15.6782	15.0685	14.3732	14.0517	14.2103	14.3411	13.907	15.4034	15.6782	15.0685	Nfix	0.770205	0.100018	0.99992	4	4	1	0
Q8BJQ4	TCAM2_MOUSE	Ticam2	TIR domain-containing adapter molecule 2	12957.8	8032.68	10467.6	11933.4	13654.8	20003.4	18942.1	21196.7	13.6615	12.9717	13.3536	13.5427	13.7371	14.288	14.2093	14.3716	13.6615	12.9717	13.3536	13.5427	13.7371	14.288	14.2093	14.3716	Ticam2	0.769095	0.00995038	2.00216	4	4	1	0
Q6P9P0	SLF2_MOUSE	Slf2	SMC5-SMC6 complex localization factor protein 2		9037.39	10559.8	8073.79	9701.91	14477.8	14302.4	15144.3		13.1417	13.3663	12.979	13.2441	13.8216	13.804	13.8865	12.2035	13.1417	13.3663	12.979	13.2441	13.8216	13.804	13.8865	Slf2	0.766381	0.0400014	1.39792	4	3	1	0
O54890	ITB3_MOUSE	Itgb3	Integrin beta-3	501051	277730	338882	299263	452755	538568	633462	761300	18.9346	18.0833	18.3704	18.1911	18.7884	19.0388	19.2729	19.5381	18.9346	18.0833	18.3704	18.1911	18.7884	19.0388	19.2729	19.5381	Itgb3	0.764686	0.0216247	1.66505	4	4	1	0
Q6DIA2	EX3L4_MOUSE	Exoc3l4	Exocyst complex component 3-like protein 4	8258.21						21032.4	17722.1	13.0116						14.3603	14.1133	13.0116	12.1943	12.2707	12.2163	12.0989	12.1714	14.3603	14.1133	Exoc3l4	0.762714	0.278341	0.555423	2	1	1	0
Q9DBA6	TYSD1_MOUSE	Tysnd1	Peroxisomal leader peptide-processing protease			9309.31	7084.87	7199.29	10095.2	19092.4	8684.67			13.1845	12.7905	12.8136	13.3014	14.2207	13.0843	12.2035	12.1943	13.1845	12.7905	12.8136	13.3014	14.2207	13.0843	Tysnd1	0.761786	0.0980927	1.00836	4	2	1	0
P62305	RUXE_MOUSE	Snrpe	Small nuclear ribonucleoprotein E	48196.3	34965.5	45358.7	40048.9	118658	40616.2	47386.9	110389	15.5566	15.0936	15.4691	15.2895	16.8564	15.3098	15.5322	16.7522	15.5566	15.0936	15.4691	15.2895	16.8564	15.3098	15.5322	16.7522	Snrpe	0.760452	0.11684	0.932407	4	4	1	0
Q8BUY5	TIDC1_MOUSE	Timmdc1	Complex I assembly factor TIMMDC1, mitochondrial	17793.6	15549.9	11847.4	17829.9	22106.8	23768.4	25182.1	36266.2	14.1191	13.9246	13.5323	14.122	14.4322	14.5368	14.6201	15.1463	14.1191	13.9246	13.5323	14.122	14.4322	14.5368	14.6201	15.1463	Timmdc1	0.759357	0.0113533	1.94488	4	4	1	0
Q62179	SEM4B_MOUSE	Sema4b	Semaphorin-4B	4634.56	5005.75	6342.3	3984.21	9260.5	7673.99	7186.29	9364.96	12.1782	12.2894	12.6308	11.9601	13.1769	12.9058	12.811	13.1931	12.1782	12.2894	12.6308	11.9601	13.1769	12.9058	12.811	13.1931	Sema4b	0.757067	0.00429502	2.36703	4	4	1	0
G3UZ90	G3UZ90_MOUSE	Calm3	Calmodulin 3 (Fragment)	50417.8	51386.6	50206.4	48144.6	68949.8	92203.6	102304	78352.6	15.6216	15.6491	15.6156	15.5551	16.0733	16.4925	16.6425	16.2577	15.6216	15.6491	15.6156	15.5551	16.0733	16.4925	16.6425	16.2577	Calm3	0.756143	0.00101874	2.99194	4	4	1	0
Q9Z2Q5	RM40_MOUSE	Mrpl40	Large ribosomal subunit protein mL40	27386.6	17566.5	8192.9	12196	20534.6	20666.7	34754.1	26177.5	14.7412	14.1005	13.0002	13.5741	14.3258	14.335	15.0849	14.676	14.7412	14.1005	13.0002	13.5741	14.3258	14.335	15.0849	14.676	Mrpl40	0.751431	0.118319	0.926947	4	4	1	0
Q64311	NTAN1_MOUSE	Ntan1	Protein N-terminal asparagine amidohydrolase	24526	15884.6	17678.7	19170.9	21408.4	28716.9	48466	35543.8	14.582	13.9553	14.1097	14.2266	14.3859	14.8096	15.5647	15.1173	14.582	13.9553	14.1097	14.2266	14.3859	14.8096	15.5647	15.1173	Ntan1	0.750944	0.0374664	1.42636	4	4	1	0
O35900	LSM2_MOUSE	Lsm2	U6 snRNA-associated Sm-like protein LSm2	57498.1	72619.7	70109.8	53278.7	67594.2	90409.7	143458	142346	15.8112	16.1481	16.0973	15.7013	16.0446	16.4642	17.1303	17.119	15.8112	16.1481	16.0973	15.7013	16.0446	16.4642	17.1303	17.119	Lsm2	0.750053	0.039839	1.39969	4	4	1	0
Q9R0C0	BL1S6_MOUSE	Bloc1s6	Biogenesis of lysosome-related organelles complex 1 subunit 6	63986.9	70331.8		79784.7	75168.5	55606.9	53967	62429.7	15.9655	16.1019		16.2838	16.1978	15.763	15.7198	15.9299	15.9655	16.1019	12.2707	16.2838	16.1978	15.763	15.7198	15.9299	Bloc1s6	0.747153	0.470315	0.327611	4	3	1	0
O09009	RFNG_MOUSE	Rfng	Beta-1,3-N-acetylglucosaminyltransferase radical fringe						8989.81	20287.1							13.1341	14.3083		12.2035	12.1943	12.2707	12.2163	12.0989	13.1341	14.3083	12.3248	Rfng	0.745297	0.18643	0.729484	2	0	1	0
Q91YH5	ATLA3_MOUSE	Atl3	Atlastin-3	560796	342609	260462	389223	924574	734252	546099	414833	19.0971	18.3862	17.9907	18.5702	19.8184	19.4859	19.0588	18.6622	19.0971	18.3862	17.9907	18.5702	19.8184	19.4859	19.0588	18.6622	Atl3	0.745262	0.0714108	1.14624	4	4	1	0
E9Q9D5	RBL2A_MOUSE	Rabl2	Rab-like protein 2A			9551.7	5271.51	6761.35	10304.9	13289.3	9486.78			13.2215	12.364	12.7231	13.331	13.698	13.2117	12.2035	12.1943	13.2215	12.364	12.7231	13.331	13.698	13.2117	Rabl2	0.745105	0.0570607	1.24366	4	2	1	0
Q9CQ43	DUT_MOUSE	Dut	Deoxyuridine 5'-triphosphate nucleotidohydrolase	155284	102384	172003	118555	202921	239870	193044	271125	17.2445	16.6436	17.3921	16.8552	17.6306	17.8719	17.5586	18.0486	17.2445	16.6436	17.3921	16.8552	17.6306	17.8719	17.5586	18.0486	Dut	0.743542	0.0112196	1.95002	4	4	1	0
Q8BZB2	COAC_MOUSE	Ppcdc	Phosphopantothenoylcysteine decarboxylase	6898.42	7511.36	6709.07	7186.65	7681.29	10721.3	15936.7	14953.8	12.7521	12.8749	12.7119	12.8111	12.9071	13.3882	13.9601	13.8682	12.7521	12.8749	12.7119	12.8111	12.9071	13.3882	13.9601	13.8682	Ppcdc	0.743426	0.0231099	1.6362	4	4	1	0
Q9D842	APLF_MOUSE	Aplf	Aprataxin and PNK-like factor	12550.9		18395.3		11791	13334.2	14918.7	17193.1	13.6155		14.167		13.5254	13.7028	13.8648	14.0695	13.6155	12.1943	14.167	12.2163	13.5254	13.7028	13.8648	14.0695	Aplf	0.742355	0.197907	0.70354	4	2	1	0
Q6PE65	GPT2L_MOUSE	Gpatch2l	G patch domain-containing protein 2-like	14621.6		10107.9	10550.5	17679.8	16033.6	16958.9	11889	13.8358		13.3032	13.365	14.1098	13.9688	14.0498	13.5373	13.8358	12.1943	13.3032	13.365	14.1098	13.9688	14.0498	13.5373	Gpatch2l	0.741839	0.0925487	1.03363	4	3	1	0
Q8CBG9	RN170_MOUSE	Rnf170	E3 ubiquitin-protein ligase RNF170	28095.5	15119.3		27012.2	19422.4	32028.3	20344.7	35025.4	14.7781	13.8841		14.7213	14.2454	14.9671	14.3124	15.0961	14.7781	13.8841	12.2707	14.7213	14.2454	14.9671	14.3124	15.0961	Rnf170	0.741689	0.279695	0.553315	4	3	1	0
O70475	UGDH_MOUSE	Ugdh	UDP-glucose 6-dehydrogenase	107927	151645	114770	103403	220001	175605	209870	187179	16.7197	17.2103	16.8084	16.6579	17.7472	17.422	17.6791	17.5141	16.7197	17.2103	16.8084	16.6579	17.7472	17.422	17.6791	17.5141	Ugdh	0.741495	0.00218695	2.66016	4	4	1	0
S4R1M9	OSB10_MOUSE	Osbpl10	Oxysterol-binding protein-related protein 10	56175.3	66061.8				49677.3	66834.4	46737.6	15.7776	16.0115				15.6003	16.0283	15.5123	15.7776	16.0115	12.2707	12.2163	12.0989	15.6003	16.0283	15.5123	Osbpl10	0.740896	0.614115	0.21175	3	2	1	0
Q61703	ITIH2_MOUSE	Itih2	Inter-alpha-trypsin inhibitor heavy chain H2	9825.19		18612.4		11713.4	11373.4	13938.2	16957.4	13.2623		14.184		13.5159	13.4734	13.7668	14.0496	13.2623	12.1943	14.184	12.2163	13.5159	13.4734	13.7668	14.0496	Itih2	0.737185	0.18702	0.728112	4	2	1	0
E9Q6D6	ZN277_MOUSE	Znf277	Zinc finger protein 277			15289	15517.4	11323.7	12685.5	12779.3	22034.3			13.9002	13.9216	13.4671	13.6309	13.6415	14.4275	12.2035	12.1943	13.9002	13.9216	13.4671	13.6309	13.6415	14.4275	Znf277	0.736818	0.220791	0.65602	4	2	1	0
B1AXP6	TOM5_MOUSE	Tomm5	Mitochondrial import receptor subunit TOM5 homolog	58991.8	46377.7	69346.5	45664.5	84597.2	98688.2	77054.7	103272	15.8482	15.5011	16.0815	15.4788	16.3683	16.5906	16.2336	16.6561	15.8482	15.5011	16.0815	15.4788	16.3683	16.5906	16.2336	16.6561	Tomm5	0.734726	0.0057196	2.24263	4	4	1	0
Q99KG7	HPS4_MOUSE	Hps4	BLOC-3 complex member HPS4	654.754	1865.39	1621.9	2353.51	1354.7	2145.55		2593.88	9.35481	10.8653	10.6635	11.2006	10.4038	11.0671		11.3409	9.35481	10.8653	10.6635	11.2006	10.4038	11.0671	12.2107	11.3409	Hps4	0.734593	0.230746	0.636865	3	4	1	0
Q8VDS4	RPR1A_MOUSE	Rprd1a	Regulation of nuclear pre-mRNA domain-containing protein 1A	25822.8	22429.5		20498.1	25545	23175.7	24362.9	31109.7	14.6564	14.4531		14.3232	14.6408	14.5003	14.5724	14.9251	14.6564	14.4531	12.2707	14.3232	14.6408	14.5003	14.5724	14.9251	Rprd1a	0.733787	0.24073	0.61847	4	3	1	0
Q3U481	MFS12_MOUSE	Mfsd12	Major facilitator superfamily domain-containing protein 12	4689.37	6066.57	7391.15	3657.01	5887.24	12225.5	8898.5	9159.61	12.1952	12.5667	12.8516	11.8364	12.5234	13.5776	13.1193	13.1611	12.1952	12.5667	12.8516	11.8364	12.5234	13.5776	13.1193	13.1611	Mfsd12	0.732881	0.0557349	1.25387	4	4	1	0
A0A0B4J1M6;E9PUV2	A0A0B4J1M6_MOUSE;E9PUV2_MOUSE	Fcgr3	Fc receptor, IgG, low affinity III	149361	142217	226325	83091	248988	226118	227040	237583	17.1884	17.1177	17.788	16.3424	17.9257	17.7867	17.7926	17.8581	17.1884	17.1177	17.788	16.3424	17.9257	17.7867	17.7926	17.8581	Fcgr3	0.731618	0.0496221	1.30432	4	4	1	0
A2ADA5	PUSL1_MOUSE	Pusl1	tRNA pseudouridine synthase-like 1	19625.7	20278.3	27137.9	12886.4	10812.6	35837.8	46639	58314.9	14.2605	14.3076	14.728	13.6536	13.4004	15.1292	15.5092	15.8316	14.2605	14.3076	14.728	13.6536	13.4004	15.1292	15.5092	15.8316	Pusl1	0.730189	0.258583	0.587401	4	4	1	0
Q8C4X1	CENPX_MOUSE	Cenpx	Centromere protein X	10380.5					13974.6	27451.9		13.3416					13.7705	14.7446		13.3416	12.1943	12.2707	12.2163	12.0989	13.7705	14.7446	12.3248	Cenpx	0.728978	0.327734	0.484478	2	1	1	0
Q5EBG6	HSPB6_MOUSE	Hspb6	Heat shock protein beta-6	48140.9	18001.2	16026.9	30351.9	70199.2	30135.7	78722.9	18919.8	15.555	14.1358	13.9682	14.8895	16.0992	14.8792	16.2645	14.2076	15.555	14.1358	13.9682	14.8895	16.0992	14.8792	16.2645	14.2076	Hspb6	0.725492	0.282297	0.549293	4	4	1	0
Q7TQP0	GP141_MOUSE	Gpr141	Probable G-protein coupled receptor 141	84626.8	42351.7	30664.5	50145.4	103292	97913.7	63041.5	64596.3	16.3688	15.3701	14.9043	15.6138	16.6564	16.5792	15.944	15.9792	16.3688	15.3701	14.9043	15.6138	16.6564	16.5792	15.944	15.9792	Gpr141	0.725425	0.0906826	1.04248	4	4	1	0
Q9DAI2	IFT22_MOUSE	Ift22	Intraflagellar transport protein 22 homolog	26767.2	28573.8	23106	31312.1	39905.1	36283.8	55282.8	51621.8	14.7082	14.8024	14.496	14.9344	15.2843	15.147	15.7545	15.6557	14.7082	14.8024	14.496	14.9344	15.2843	15.147	15.7545	15.6557	Ift22	0.725141	0.0056242	2.24994	4	4	1	0
Q01102	LYAM3_MOUSE	Selp	P-selectin	53773.9	23704.2	47950	20699.9	37655.9	54487.6	62748.4	73289.2	15.7146	14.5329	15.5492	14.3373	15.2006	15.7336	15.9373	16.1613	15.7146	14.5329	15.5492	14.3373	15.2006	15.7336	15.9373	16.1613	Selp	0.724695	0.123995	0.906595	4	4	1	0
Q9CRC9	GNPI2_MOUSE	Gnpda2	Glucosamine-6-phosphate isomerase 2	15619.9	17621.5		16510.8	14822.3	17421.2	26984.7	24011.2	13.9311	14.105		14.0111	13.8555	14.0886	14.7199	14.5514	13.9311	14.105	12.2707	14.0111	13.8555	14.0886	14.7199	14.5514	Gnpda2	0.724327	0.183107	0.737295	4	3	1	0
Q9CQS5	RIOK2_MOUSE	Riok2	Serine/threonine-protein kinase RIO2	12822.2	7983.37			14375	9736.55		26874.5	13.6464	12.9628			13.8113	13.2492		14.714	13.6464	12.9628	12.2707	12.2163	13.8113	13.2492	12.2107	14.714	Riok2	0.722239	0.290339	0.537095	3	2	1	0
Q925T4	Q925T4_MOUSE	Plagl2	PLAGL2	13521.9	11743.3	9877.65	7897.3	17173.7	23223	19253.8	11912.3	13.723	13.5196	13.27	12.9471	14.0679	14.5033	14.2329	13.5402	13.723	13.5196	13.27	12.9471	14.0679	14.5033	14.2329	13.5402	Plagl2	0.721136	0.0336193	1.47341	4	4	1	0
P43883	PLIN2_MOUSE	Plin2	Perilipin-2	7642.03	18354.1	7492	5991.2	15916.8	15862.1	12027.8	15227.5	12.8997	14.1638	12.8711	12.5486	13.9583	13.9533	13.5541	13.8944	12.8997	14.1638	12.8711	12.5486	13.9583	13.9533	13.5541	13.8944	Plin2	0.719179	0.0995297	1.00205	4	4	1	0
Q5NBU8	XAF1_MOUSE	Xaf1	XIAP-associated factor 1	46098.6	48237.7	86682.3	17397.1	27092.9	74084.4	92727.5	132053	15.4924	15.5579	16.4034	14.0866	14.7256	16.1769	16.5007	17.0108	15.4924	15.5579	16.4034	14.0866	14.7256	16.1769	16.5007	17.0108	Xaf1	0.718415	0.335415	0.474417	4	4	1	0
Q8K2C6	SIR5_MOUSE	Sirt5	NAD-dependent protein deacylase sirtuin-5, mitochondrial	30437.3	26472.7	28263.9	23067.3	31195.7	43780.5	59294.4	47446.6	14.8936	14.6922	14.7867	14.4936	14.9291	15.418	15.8556	15.534	14.8936	14.6922	14.7867	14.4936	14.9291	15.418	15.8556	15.534	Sirt5	0.71767	0.0142068	1.8475	4	4	1	0
P16332	MUTA_MOUSE	Mmut	Methylmalonyl-CoA mutase, mitochondrial	23286.1	25342.8	35407.3	29601.5	29252.8	51539.6	44369.4	67492.5	14.5072	14.6293	15.1118	14.8534	14.8363	15.6534	15.4373	16.0424	14.5072	14.6293	15.1118	14.8534	14.8363	15.6534	15.4373	16.0424	Mmut	0.716947	0.0455406	1.3416	4	4	1	0
P56393	COX7B_MOUSE	Cox7b	Cytochrome c oxidase subunit 7B, mitochondrial	222934	118066	243308	156846	342340	306684	270299	258289	17.7663	16.8492	17.8924	17.259	18.3851	18.2264	18.0442	17.9786	17.7663	16.8492	17.8924	17.259	18.3851	18.2264	18.0442	17.9786	Cox7b	0.716846	0.0317296	1.49854	4	4	1	0
Q9R0Q1	SYTL4_MOUSE	Sytl4	Synaptotagmin-like protein 4	18425.8	10928.8	18592.6	11509	16476	20979.5	30450.8	29865.7	14.1694	13.4158	14.1824	13.4905	14.0081	14.3567	14.8942	14.8662	14.1694	13.4158	14.1824	13.4905	14.0081	14.3567	14.8942	14.8662	Sytl4	0.716741	0.0535501	1.27124	4	4	1	0
A6H5X4	PHF11_MOUSE	Phf11	PHD finger protein 11						5459.01	8391.21	18799.9						12.4144	13.0347	14.1984	12.2035	12.1943	12.2707	12.2163	12.0989	12.4144	13.0347	14.1984	Phf11	0.715382	0.173796	0.759959	3	0	1	0
A0A2I3BRJ4	A0A2I3BRJ4_MOUSE	6030458C11Rik	RIKEN cDNA 6030458C11 gene	18502	12917.1	13827.3	13331.4	20217.5	23582.8	24191.9	27756	14.1754	13.657	13.7552	13.7025	14.3033	14.5254	14.5622	14.7605	14.1754	13.657	13.7552	13.7025	14.3033	14.5254	14.5622	14.7605	6030458C11Rik	0.715338	0.00327383	2.48494	4	4	1	0
O54865	GCYB1_MOUSE	Gucy1b1	Guanylate cyclase soluble subunit beta-1	5570.33				4366.78	6898.47	13422.5	11030.5	12.4435				12.0924	12.7521	13.7124	13.4292	12.4435	12.1943	12.2707	12.2163	12.0924	12.7521	13.7124	13.4292	Gucy1b1	0.715266	0.0991105	1.00388	4	1	1	0
Q1MX42	Q1MX42_MOUSE	Prkcd	Protein kinase C	47353.5	64031.9	51861.8	56052.4	58246.8	98746.8	115188	96487.4	15.5312	15.9665	15.6624	15.7745	15.8299	16.5914	16.8136	16.5581	15.5312	15.9665	15.6624	15.7745	15.8299	16.5914	16.8136	16.5581	Prkcd	0.714615	0.0219546	1.65847	4	4	1	0
Q9CWD8	NUBPL_MOUSE	Nubpl	Iron-sulfur cluster transfer protein NUBPL	34908.3	28970.9	22391.1	19701.5	43193.1	41135.9	54943.7	32942.9	15.0913	14.8223	14.4506	14.266	15.3985	15.3281	15.7457	15.0077	15.0913	14.8223	14.4506	14.266	15.3985	15.3281	15.7457	15.0077	Nubpl	0.712429	0.0246711	1.60781	4	4	1	0
Q8BSE7	Q8BSE7_MOUSE	Clasp2	CLIP associating protein 2	6957.75	5193.21	6847.91	6190.02	9669.03	8025.24	10507.1	13496.7	12.7644	12.3424	12.7414	12.5957	13.2392	12.9703	13.3591	13.7203	12.7644	12.3424	12.7414	12.5957	13.2392	12.9703	13.3591	13.7203	Clasp2	0.711222	0.00818365	2.08705	4	4	1	0
Q8BTY8	SCFD2_MOUSE	Scfd2	Sec1 family domain-containing protein 2	79696.3	77875	78862.1	98695.4	160904	141792	156519	97168.5	16.2822	16.2489	16.267	16.5907	17.2958	17.1134	17.256	16.5682	16.2822	16.2489	16.267	16.5907	17.2958	17.1134	17.256	16.5682	Scfd2	0.71115	0.00887621	2.05177	4	4	1	0
Q8C2E4	PTCD1_MOUSE	Ptcd1	Pentatricopeptide repeat-containing protein 1, mitochondrial	11190.8	7844.29	11498.6		10734.1	11214.2	22392.6	12777	13.45	12.9374	13.4892		13.3899	13.453	14.4507	13.6413	13.45	12.9374	13.4892	12.2163	13.3899	13.453	14.4507	13.6413	Ptcd1	0.710503	0.114399	0.941578	4	3	1	0
P39429	TRAF2_MOUSE	Traf2	TNF receptor-associated factor 2	32137.8	32615.2	31263.8	34059.5	56252.7	56624	54813.1	45632.2	14.972	14.9933	14.9322	15.0558	15.7796	15.7891	15.7422	15.4778	14.972	14.9933	14.9322	15.0558	15.7796	15.7891	15.7422	15.4778	Traf2	0.708886	0.000101208	3.99478	4	4	1	0
Q9DAW6	PRP4_MOUSE	Prpf4	U4/U6 small nuclear ribonucleoprotein Prp4	443893	464104	286766	207892	494003	546559	543876	596509	18.7599	18.8241	18.1295	17.6655	18.9142	19.06	19.0529	19.1862	18.7599	18.8241	18.1295	17.6655	18.9142	19.06	19.0529	19.1862	Prpf4	0.708588	0.0451325	1.34551	4	4	1	0
Q9CPW2	FDX2_MOUSE	Fdx2	Ferredoxin-2, mitochondrial	7113.42	4835.25	4220.14	8590.85	7983.35	13539.4	8656.96	9503.16	12.7963	12.2394	12.0431	13.0686	12.9628	13.7249	13.0796	13.2142	12.7963	12.2394	12.0431	13.0686	12.9628	13.7249	13.0796	13.2142	Fdx2	0.708532	0.0511949	1.29077	4	4	1	0
Q8K0E8	FIBB_MOUSE	Fgb	Fibrinogen beta chain	194304	84381.1	117184	79390	134051	224462	173409	205917	17.568	16.3646	16.8384	16.2767	17.0324	17.7761	17.4038	17.6517	17.568	16.3646	16.8384	16.2767	17.0324	17.7761	17.4038	17.6517	Fgb	0.704096	0.0824157	1.08399	4	4	1	0
D3Z0M9	D3Z0M9_MOUSE	Ddx23	RNA helicase	472811	205145	159418	306599	456051	508058	456681	313431	18.8509	17.6463	17.2825	18.226	18.7988	18.9546	18.8008	18.2578	18.8509	17.6463	17.2825	18.226	18.7988	18.9546	18.8008	18.2578	Ddx23	0.701612	0.111199	0.953897	4	4	1	0
P01101	FOS_MOUSE	Fos	Protein c-Fos	34087.4	25363.7	14338.3	13794.8	49549.4	24758.5	39958	24110.5	15.057	14.6305	13.8076	13.7518	15.5966	14.5956	15.2862	14.5574	15.057	14.6305	13.8076	13.7518	15.5966	14.5956	15.2862	14.5574	Fos	0.697234	0.140281	0.853001	4	4	1	0
P15806	TFE2_MOUSE	Tcf3	Transcription factor E2-alpha	16965.5	14464.2	6935.83	7669.43	13172	12960.6	21762.6	24228.2	14.0503	13.8202	12.7599	12.9049	13.6852	13.6618	14.4096	14.5644	14.0503	13.8202	12.7599	12.9049	13.6852	13.6618	14.4096	14.5644	Tcf3	0.696431	0.132921	0.876408	4	4	1	0
Q9QUQ5	TRPC4_MOUSE	Trpc4	Short transient receptor potential channel 4		17818				13099	14531.5	16261.4		14.121				13.6772	13.8269	13.9892	12.2035	14.121	12.2707	12.2163	12.0989	13.6772	13.8269	13.9892	Trpc4	0.69513	0.322157	0.491933	3	1	1	0
Q9WTX6	CUL1_MOUSE	Cul1	Cullin-1	195811	156097	209010	146342	163931	315667	334160	369997	17.5791	17.2521	17.6732	17.159	17.3227	18.268	18.3502	18.4972	17.5791	17.2521	17.6732	17.159	17.3227	18.268	18.3502	18.4972	Cul1	0.693681	0.0563958	1.24875	4	4	1	0
Q9D9H8	CB069_MOUSE		Mitochondrial protein C2orf69 homolog		27424.4	40945.8	31952.7	33811.9	28556.9	29024.7	41251.3		14.7432	15.3214	14.9637	15.0452	14.8016	14.825	15.3322	12.2035	14.7432	15.3214	14.9637	15.0452	14.8016	14.825	15.3322		0.693041	0.374252	0.426836	4	3	1	0
P99027	RLA2_MOUSE	Rplp2	Large ribosomal subunit protein P2	1347860	984310	896093	1145710	1443340	2041450	1596540	1968140	20.3622	19.9088	19.7733	20.1278	20.461	20.9612	20.6065	20.9084	20.3622	19.9088	19.7733	20.1278	20.461	20.9612	20.6065	20.9084	Rplp2	0.691242	0.00778054	2.10899	4	4	1	0
Q3UBZ5	MI4GD_MOUSE	Mif4gd	MIF4G domain-containing protein				7929.93	11876.2	10700.2	6237.9	7397.39				12.9531	13.5358	13.3854	12.6068	12.8528	12.2035	12.1943	12.2707	12.9531	13.5358	13.3854	12.6068	12.8528	Mif4gd	0.689774	0.0522177	1.28218	4	1	1	0
O08538	ANGP1_MOUSE	Angpt1	Angiopoietin-1	39168.2	26109.1	36261.1	18606.4	28429.5	42636.7	58947.2	65257.4	15.2574	14.6723	15.1461	14.1835	14.7951	15.3798	15.8471	15.9939	15.2574	14.6723	15.1461	14.1835	14.7951	15.3798	15.8471	15.9939	Angpt1	0.689148	0.10807	0.966295	4	4	1	0
Q99LJ1	FUCO_MOUSE	Fuca1	Tissue alpha-L-fucosidase	43930.7	67104.5	41131.1	38754	70423.6	77449.9	68785.7	83973.3	15.4229	16.0341	15.3279	15.2421	16.1038	16.241	16.0698	16.3576	15.4229	16.0341	15.3279	15.2421	16.1038	16.241	16.0698	16.3576	Fuca1	0.686287	0.0115712	1.93662	4	4	1	0
P80313	TCPH_MOUSE	Cct7	T-complex protein 1 subunit eta	512272	636526	717241	660561	527299	902633	1473220	1473800	18.9666	19.2799	19.4521	19.3333	19.0083	19.7838	20.4905	20.4911	18.9666	19.2799	19.4521	19.3333	19.0083	19.7838	20.4905	20.4911	Cct7	0.685463	0.112075	0.950492	4	4	1	0
E9PV24	FIBA_MOUSE	Fga	Fibrinogen alpha chain	242013	139163	148410	137736	206627	291303	234960	324204	17.8847	17.0864	17.1792	17.0715	17.6567	18.1522	17.8421	18.3065	17.8847	17.0864	17.1792	17.0715	17.6567	18.1522	17.8421	18.3065	Fga	0.683878	0.0309888	1.50879	4	4	1	0
Q8BLM0	KLF8_MOUSE	Klf8	Krueppel-like factor 8	11006.5	19428.4	28250.6	15277.9	24146.3	28874.4	30070	29285.1	13.4261	14.2459	14.786	13.8992	14.5595	14.8175	14.876	14.8379	13.4261	14.2459	14.786	13.8992	14.5595	14.8175	14.876	14.8379	Klf8	0.683459	0.0600734	1.22132	4	4	1	0
Q3U269	TSTD2_MOUSE	Tstd2	Thiosulfate sulfurtransferase/rhodanese-like domain-containing protein 2	2759.04	5998.79	6065.41			6711.9	8865.15	12135.7	11.43	12.5505	12.5664			12.7125	13.1139	13.567	11.43	12.5505	12.5664	12.2163	12.0989	12.7125	13.1139	13.567	Tstd2	0.682302	0.146919	0.832921	3	3	1	0
Q7TPS0	KS6A6_MOUSE	Rps6ka6	Ribosomal protein S6 kinase alpha-6	2361.8		8876.67			10683.1		13943.9	11.2057		13.1158			13.383		13.7673	11.2057	12.1943	13.1158	12.2163	12.0989	13.383	12.2107	13.7673	Rps6ka6	0.681976	0.278051	0.555875	2	2	1	0
F6TVH9	F6TVH9_MOUSE	Sidt2	SID1 transmembrane family, member 2 (Fragment)	8483.69	13280.5		8697.09	13225.6	11526	13561.6	15424.1	13.0505	13.697		13.0863	13.691	13.4926	13.7272	13.9129	13.0505	13.697	12.2707	13.0863	13.691	13.4926	13.7272	13.9129	Sidt2	0.679809	0.067152	1.17294	4	3	1	0
P97479	MYO7A_MOUSE	Myo7a	Unconventional myosin-VIIa	14143.9		18332.1	13902.4	15328.5	17867	23826.9	16844.7	13.7879		14.1621	13.763	13.9039	14.125	14.5403	14.04	13.7879	12.1943	14.1621	13.763	13.9039	14.125	14.5403	14.04	Myo7a	0.675473	0.190814	0.719389	4	3	1	0
Q8R1T4	S35A3_MOUSE	Slc35a3	UDP-N-acetylglucosamine transporter	51726.2	49714.5	53602.5	53025.9	64722	92019.5	87057.7	91544.5	15.6586	15.6014	15.71	15.6944	15.982	16.4897	16.4097	16.4822	15.6586	15.6014	15.71	15.6944	15.982	16.4897	16.4097	16.4822	Slc35a3	0.67477	0.00155833	2.80734	4	4	1	0
Q8CIZ8	VWF_MOUSE	Vwf	von Willebrand factor	157887	83717.9	119131	87002	125527	166058	186961	227543	17.2685	16.3532	16.8622	16.4088	16.9376	17.3413	17.5124	17.7958	17.2685	16.3532	16.8622	16.4088	16.9376	17.3413	17.5124	17.7958	Vwf	0.673598	0.0527065	1.27814	4	4	1	0
Q9JLR9	HIG1A_MOUSE	Higd1a	HIG1 domain family member 1A, mitochondrial	16450.8	14743.2	20856		16162.6	18185.5	25853.1	20395.4	14.0059	13.8478	14.3482		13.9804	14.1505	14.658	14.316	14.0059	13.8478	14.3482	12.2163	13.9804	14.1505	14.658	14.316	Higd1a	0.67169	0.22437	0.649036	4	3	1	0
Q8BW75	AOFB_MOUSE	Maob	Amine oxidase [flavin-containing] B	16500.5	16989.9	6005.88	10931.8	17868.5	18672.1	19130.3	18549.9	14.0102	14.0524	12.5522	13.4162	14.1251	14.1886	14.2236	14.1791	14.0102	14.0524	12.5522	13.4162	14.1251	14.1886	14.2236	14.1791	Maob	0.671352	0.104057	0.982727	4	4	1	0
Q91WG4	ELP2_MOUSE	Elp2	Elongator complex protein 2	37646.3	44368.1	50158.3	47187.4	42691.4	74209.6	86033.3	93135	15.2002	15.4372	15.6142	15.5261	15.3817	16.1793	16.3926	16.507	15.2002	15.4372	15.6142	15.5261	15.3817	16.1793	16.3926	16.507	Elp2	0.670712	0.0469064	1.32877	4	4	1	0
O88783	FA5_MOUSE	F5	Coagulation factor V	90426.1	54949.8	76659.5	59351.7	84313.8	105861	118716	136999	16.4645	15.7458	16.2262	15.857	16.3635	16.6918	16.8572	17.0638	16.4645	15.7458	16.2262	15.857	16.3635	16.6918	16.8572	17.0638	F5	0.670699	0.0234838	1.62923	4	4	1	0
Q9JKL4	NDUF3_MOUSE	Ndufaf3	NADH dehydrogenase [ubiquinone] 1 alpha subcomplex assembly factor 3	37862	29669.8	36393.7	31860	48961	56059.7	63585.6	47904.4	15.2085	14.8567	15.1514	14.9595	15.5793	15.7747	15.9564	15.5479	15.2085	14.8567	15.1514	14.9595	15.5793	15.7747	15.9564	15.5479	Ndufaf3	0.670569	0.00175551	2.7556	4	4	1	0
Q61908	CMC4_MOUSE	Cmc4	Cx9C motif-containing protein 4	12843.2	17815.2	5051.11	20467.5	23140.2	23605	12733.9	21733.5	13.6487	14.1208	12.3024	14.321	14.4981	14.5268	13.6364	14.4076	13.6487	14.1208	12.3024	14.321	14.4981	14.5268	13.6364	14.4076	Cmc4	0.668992	0.23045	0.637423	4	4	1	0
Q7TNF9	F117A_MOUSE	Fam117a	Protein FAM117A	24852.1	23994.3	21675.1	21496.6	25751.8	38226.3	41675.9	43244.4	14.6011	14.5504	14.4038	14.3918	14.6524	15.2223	15.3469	15.4002	14.6011	14.5504	14.4038	14.3918	14.6524	15.2223	15.3469	15.4002	Fam117a	0.66869	0.00981875	2.00794	4	4	1	0
Q9JLY0	SOCS6_MOUSE	Socs6	Suppressor of cytokine signaling 6							16869.4	9642.92							14.0421	13.2353	12.2035	12.1943	12.2707	12.2163	12.0989	12.1714	14.0421	13.2353	Socs6	0.665683	0.202049	0.694544	2	0	1	0
Q99P30	NUDT7_MOUSE	Nudt7	Peroxisomal coenzyme A diphosphatase NUDT7	12475.4	11207.7		13833.3	18733.4	13456.8	14799.6	16114.3	13.6068	13.4522		13.7559	14.1933	13.716	13.8533	13.9761	13.6068	13.4522	12.2707	13.7559	14.1933	13.716	13.8533	13.9761	Nudt7	0.663276	0.110162	0.957969	4	3	1	0
Q8BFY7	PIMRE_MOUSE	Pimreg	Protein PIMREG	14190.6	10588	9142.6	17275.9	20000	27532.2	16777.7	16127.7	13.7926	13.3701	13.1584	14.0765	14.2877	14.7488	14.0343	13.9773	13.7926	13.3701	13.1584	14.0765	14.2877	14.7488	14.0343	13.9773	Pimreg	0.662601	0.0502529	1.29884	4	4	1	0
Q9DCC4	P5CR3_MOUSE	Pycr3	Pyrroline-5-carboxylate reductase 3	466666	495575	417648	408817	401528	828503	837390	889148	18.832	18.9187	18.6719	18.6411	18.6151	19.6601	19.6755	19.7621	18.832	18.9187	18.6719	18.6411	18.6151	19.6601	19.6755	19.7621	Pycr3	0.662274	0.0557705	1.2536	4	4	1	0
Q6KAU7	PKHG2_MOUSE	Plekhg2	Pleckstrin homology domain-containing family G member 2	8170.84	6766.38	11792.9		7872.23	13218.6	12186.6	15193	12.9963	12.7242	13.5256		12.9426	13.6903	13.573	13.8911	12.9963	12.7242	13.5256	12.2163	12.9426	13.6903	13.573	13.8911	Plekhg2	0.658646	0.101809	0.992216	4	3	1	0
A0A087WSJ3	A0A087WSJ3_MOUSE	2510002D24Rik	RIKEN cDNA 2510002D24 gene	19100.3		24723.9	18639.8	15475.3	16357.4	32643.7	30872.5	14.2213		14.5936	14.1861	13.9177	13.9977	14.9945	14.914	14.2213	12.1943	14.5936	14.1861	13.9177	13.9977	14.9945	14.914	2510002D24Rik	0.657132	0.326164	0.486564	4	3	1	0
Q9Z131	3BP5_MOUSE	Sh3bp5	SH3 domain-binding protein 5			7111.61	10279.9	12490.8	16192.8	5267.36	9368.39			12.796	13.3275	13.6086	13.9831	12.3629	13.1936	12.2035	12.1943	12.796	13.3275	13.6086	13.9831	12.3629	13.1936	Sh3bp5	0.656684	0.18726	0.727554	4	2	1	0
B2RPV6	MMRN1_MOUSE	Mmrn1	Multimerin-1	137019	82379.6	169232	82141.1	117777	166777	208978	234836	17.064	16.33	17.3686	16.3258	16.8457	17.3476	17.673	17.8413	17.064	16.33	17.3686	16.3258	16.8457	17.3476	17.673	17.8413	Mmrn1	0.654767	0.10489	0.979267	4	4	1	0
P39876	TIMP3_MOUSE	Timp3	Metalloproteinase inhibitor 3	90905.6	33536.7	69960.6	51983	61792.6	82954	127285	104005	16.4721	15.0335	16.0943	15.6658	15.9151	16.34	16.9577	16.6663	16.4721	15.0335	16.0943	15.6658	15.9151	16.34	16.9577	16.6663	Timp3	0.653406	0.137363	0.862132	4	4	1	0
Q8BIC7	Q8BIC7_MOUSE	Zfp763	Zinc finger protein 763		17378.8				20907.8	24968.9			14.085				14.3518	14.6078		12.2035	14.085	12.2707	12.2163	12.0989	14.3518	14.6078	12.3248	Zfp763	0.651932	0.449176	0.347584	2	1	1	0
Q8VHK1	CSKI2_MOUSE	Caskin2	Caskin-2		9821.81		11888.5	8490.41	8053.98	16928.8	14261		13.2618		13.5373	13.0516	12.9755	14.0472	13.7998	12.2035	13.2618	12.2707	13.5373	13.0516	12.9755	14.0472	13.7998	Caskin2	0.650193	0.18413	0.734876	4	2	1	0
Q99MS8	TPGS1_MOUSE	Tpgs1	Tubulin polyglutamylase complex subunit 1				11514.6	13823.8	11128.1	6808.44	7266.16				13.4912	13.7549	13.4419	12.7331	12.827	12.2035	12.1943	12.2707	13.4912	13.7549	13.4419	12.7331	12.827	Tpgs1	0.649276	0.156851	0.804512	4	1	1	0
S4R2G3	S4R2G3_MOUSE	Srsf5	Serine and arginine-rich splicing factor 5	2071.61	1680.12							11.0165	10.7143							11.0165	10.7143	12.2707	12.2163	12.0989	12.1714	12.2107	12.3248	Srsf5	0.646971	0.161698	0.791296	0	2	1	0
P61208	ARL4C_MOUSE	Arl4c	ADP-ribosylation factor-like protein 4C			1806.4	3676.32	7851.55						10.8189	11.844	12.9388				12.2035	12.1943	10.8189	11.844	12.9388	12.1714	12.2107	12.3248	Arl4c	0.646216	0.13312	0.875758	1	2	1	0
P12399	CTL2A_MOUSE	Ctla2a	Protein CTLA-2-alpha	56720.1	35314.4	48249.2	42542.3	35530.1	91890.7	97092.4	77572.6	15.7916	15.108	15.5582	15.3766	15.1168	16.4876	16.5671	16.2433	15.7916	15.108	15.5582	15.3766	15.1168	16.4876	16.5671	16.2433	Ctla2a	0.645087	0.128312	0.891732	4	4	1	0
Q61387	COX7R_MOUSE	Cox7a2l	Cytochrome c oxidase subunit 7A-related protein, mitochondrial	44237.9	35536.2	30208.3	28003.3	58525.1	53225.7	54470.5	46706.1	15.433	15.117	14.8827	14.7733	15.8368	15.6998	15.7332	15.5113	15.433	15.117	14.8827	14.7733	15.8368	15.6998	15.7332	15.5113	Cox7a2l	0.643788	0.00712925	2.14696	4	4	1	0
Q91VF2	HNMT_MOUSE	Hnmt	Histamine N-methyltransferase	11418.6	15270.5	13631.3	9454.83	19574.8	14023	23472.8	20770.8	13.4791	13.8985	13.7346	13.2068	14.2567	13.7755	14.5187	14.3423	13.4791	13.8985	13.7346	13.2068	14.2567	13.7755	14.5187	14.3423	Hnmt	0.64354	0.0261937	1.5818	4	4	1	0
Q925F2	ESAM_MOUSE	Esam	Endothelial cell-selective adhesion molecule	17795.6	11900.7	17899.1	10404.9	15300.2	24376	23316.9	26991.7	14.1192	13.5388	14.1276	13.345	13.9013	14.5732	14.5091	14.7202	14.1192	13.5388	14.1276	13.345	13.9013	14.5732	14.5091	14.7202	Esam	0.643297	0.0544746	1.26381	4	4	1	0
Q9CQA6	CHCH1_MOUSE	Chchd1	Small ribosomal subunit protein mS37	26487.9	17333.7	13156.5	13835.4	32377.4	25577.8	22373.2	26794.1	14.693	14.0813	13.6835	13.7561	14.9827	14.6426	14.4495	14.7096	14.693	14.0813	13.6835	13.7561	14.9827	14.6426	14.4495	14.7096	Chchd1	0.642628	0.0453657	1.34327	4	4	1	0
A0A1W2P733	A0A1W2P733_MOUSE	Mthfd1	C-1-tetrahydrofolate synthase, cytoplasmic	274997	139024	357804	215421	311423	273173	429290	477270	18.0691	17.085	18.4488	17.7168	18.2485	18.0595	18.7116	18.8644	18.0691	17.085	18.4488	17.7168	18.2485	18.0595	18.7116	18.8644	Mthfd1	0.641093	0.113634	0.944494	4	4	1	0
Q3UQU0	BRD9_MOUSE	Brd9	Bromodomain-containing protein 9	47334.2	24110.8	20039.1	24729.1	41769.1	42819.4	54196.2	34401.6	15.5306	14.5574	14.2905	14.5939	15.3501	15.386	15.7259	15.0702	15.5306	14.5574	14.2905	14.5939	15.3501	15.386	15.7259	15.0702	Brd9	0.639945	0.0787862	1.10355	4	4	1	0
A0A2I3BS49;Q9CXU4	A0A2I3BS49_MOUSE;Q9CXU4_MOUSE	Timm23	Translocase of inner mitochondrial membrane 23	34151.6	51612.2	57542.1	47549	55456.7	74400.2	79963.7	85902.1	15.0597	15.6554	15.8123	15.5371	15.7591	16.183	16.2871	16.3904	15.0597	15.6554	15.8123	15.5371	15.7591	16.183	16.2871	16.3904	Timm23	0.638752	0.0242075	1.61605	4	4	1	0
Q9CZ69	CKLF6_MOUSE	Cmtm6	CKLF-like MARVEL transmembrane domain-containing protein 6	25035.6	15818.9	14384.4	17849.7	28608.7	24886	28109.7	29788.8	14.6117	13.9494	13.8122	14.1236	14.8042	14.603	14.7788	14.8625	14.6117	13.9494	13.8122	14.1236	14.8042	14.603	14.7788	14.8625	Cmtm6	0.637898	0.0131266	1.88185	4	4	1	0
Q3TQQ9	FIRRM_MOUSE	Firrm	FIGNL1-interacting regulator of recombination and mitosis	6671.45	2614.74	4526.41	2086.78		3390.13	8139.71	7978.28	12.7038	11.3525	12.1442	11.0271		11.7271	12.9908	12.9619	12.7038	11.3525	12.1442	11.0271	12.0989	11.7271	12.9908	12.9619	Firrm	0.637802	0.244501	0.611719	3	4	1	0
Q6P068	ARL5C_MOUSE	Arl5c	ADP-ribosylation factor-like protein 5C	6703.32	5260.23	9080.84	4152.77	7844.23	9729.64	8004.03	12733.8	12.7107	12.3609	13.1486	12.0199	12.9374	13.2482	12.9665	13.6364	12.7107	12.3609	13.1486	12.0199	12.9374	13.2482	12.9665	13.6364	Arl5c	0.637109	0.0711946	1.14755	4	4	1	0
Q9DCT6	BAP18_MOUSE	Bap18	Chromatin complexes subunit BAP18	114224	112114	114350	108006	141830	180294	173405	208605	16.8015	16.7746	16.8031	16.7208	17.1138	17.46	17.4038	17.6704	16.8015	16.7746	16.8031	16.7208	17.1138	17.46	17.4038	17.6704	Bap18	0.637008	0.00155214	2.80907	4	4	1	0
Q8VCD7	KDM4C_MOUSE	Kdm4c	Lysine-specific demethylase 4C		15991.3	12398.5	9324.3	15460	13421.2	14897.3	16431.9		13.965	13.5979	13.1868	13.9163	13.7122	13.8628	14.0042	12.2035	13.965	13.5979	13.1868	13.9163	13.7122	13.8628	14.0042	Kdm4c	0.635568	0.149591	0.825094	4	3	1	0
Q9CQ04	OGFD2_MOUSE	Ogfod2	2-oxoglutarate and iron-dependent oxygenase domain-containing protein 2	15897.5	14852	20523.9	15486.5	17981.7	30240.2	26514.3	30234.1	13.9565	13.8584	14.325	13.9187	14.1342	14.8842	14.6945	14.8839	13.9565	13.8584	14.325	13.9187	14.1342	14.8842	14.6945	14.8839	Ogfod2	0.634543	0.0217911	1.66172	4	4	1	0
A0A087WNP5;F8VPU7	A0A087WNP5_MOUSE;F8VPU7_MOUSE	Gm10778	Predicted gene 10778		172523	143486	277867	532455	428851		174073		17.3964	17.1306	18.084	19.0223	18.7101		17.4093	12.2035	17.3964	17.1306	18.084	19.0223	18.7101	12.2107	17.4093	Gm10778	0.634484	0.770461	0.113249	3	3	1	0
Q91XL3	UXS1_MOUSE	Uxs1	UDP-glucuronic acid decarboxylase 1	7085.2	6857.03	9728.88	6594.21	10083.5	9290.87	11058.5	17318.9	12.7906	12.7434	13.2481	12.687	13.2997	13.1816	13.4329	14.0801	12.7906	12.7434	13.2481	12.687	13.2997	13.1816	13.4329	14.0801	Uxs1	0.631308	0.0380443	1.41971	4	4	1	0
Q04519	ASM_MOUSE	Smpd1	Sphingomyelin phosphodiesterase	9465.01	8686.25	7607.48	7819.08	13048.7	9277.12	14082.2	16454.6	13.2084	13.0845	12.8932	12.9328	13.6716	13.1795	13.7816	14.0062	13.2084	13.0845	12.8932	12.9328	13.6716	13.1795	13.7816	14.0062	Smpd1	0.629994	0.0157419	1.80294	4	4	1	0
Q80YV2	ZC3C1_MOUSE	Zc3hc1	Zinc finger C3HC-type protein 1	46512.3	72959.6	63250.3	82250.3	94735.3	90457.7	102697	114535	15.5053	16.1548	15.9488	16.3277	16.5316	16.465	16.648	16.8054	15.5053	16.1548	15.9488	16.3277	16.5316	16.465	16.648	16.8054	Zc3hc1	0.628345	0.0171456	1.76585	4	4	1	0
Q03958	PFD6_MOUSE	Pfdn6	Prefoldin subunit 6	383534	291497	308474	274401	424614	488725	559939	464404	18.549	18.1531	18.2348	18.0659	18.6958	18.8987	19.0949	18.825	18.549	18.1531	18.2348	18.0659	18.6958	18.8987	19.0949	18.825	Pfdn6	0.627889	0.00341037	2.4672	4	4	1	0
Q8VCM7	FIBG_MOUSE	Fgg	Fibrinogen gamma chain	312799	178926	246581	172768	212449	346100	392641	469867	18.2549	17.449	17.9117	17.3985	17.6968	18.4008	18.5829	18.8419	18.2549	17.449	17.9117	17.3985	17.6968	18.4008	18.5829	18.8419	Fgg	0.627068	0.0964658	1.01563	4	4	1	0
Q9JL99	CLC1B_MOUSE	Clec1b	C-type lectin domain family 1 member B	64271.9	31823.2	42079.3	34157.2	48152.9	65811	63653.2	82664.8	15.9719	14.9578	15.3608	15.0599	15.5553	16.006	15.9579	16.335	15.9719	14.9578	15.3608	15.0599	15.5553	16.006	15.9579	16.335	Clec1b	0.625973	0.0656458	1.18279	4	4	1	0
P56394	COX17_MOUSE	Cox17	Cytochrome c oxidase copper chaperone	105170	85824	116059	61573.7	114216	139939	174279	131292	16.6824	16.3891	16.8245	15.91	16.8014	17.0944	17.411	17.0024	16.6824	16.3891	16.8245	15.91	16.8014	17.0944	17.411	17.0024	Cox17	0.62583	0.0394066	1.40443	4	4	1	0
P05213	TBA1B_MOUSE	Tuba1b	Tubulin alpha-1B chain	335883	330086	262593	545925	811178	368827	498126	603881	18.3576	18.3325	18.0025	19.0583	19.6297	18.4926	18.9262	19.2039	18.3576	18.3325	18.0025	19.0583	19.6297	18.4926	18.9262	19.2039	Tuba1b	0.625351	0.103717	0.984152	4	4	1	0
Q9DCA5	BRX1_MOUSE	Brix1	Ribosome biogenesis protein BRX1 homolog	132352	95344.8	77909.6	89589.3	145432	158581	137438	156864	17.014	16.5409	16.2495	16.451	17.15	17.2749	17.0684	17.2592	17.014	16.5409	16.2495	16.451	17.15	17.2749	17.0684	17.2592	Brix1	0.624246	0.0101851	1.99204	4	4	1	0
Q9CWQ3	ATP23_MOUSE	Atp23	Mitochondrial inner membrane protease ATP23 homolog	28424.8	38593.4		37987.3	25443.2	36319.4	38398.5	32631.3	14.7949	15.2361		15.2132	14.635	15.1485	15.2288	14.994	14.7949	15.2361	12.2707	15.2132	14.635	15.1485	15.2288	14.994	Atp23	0.62282	0.421491	0.375212	4	3	1	0
O89084	PDE4A_MOUSE	Pde4a	3',5'-cyclic-AMP phosphodiesterase 4A	15453.6	14068.9	17110.3	16776.4	21581.9	23017.7	23927.9	29478.7	13.9157	13.7802	14.0626	14.0341	14.3975	14.4905	14.5464	14.8474	13.9157	13.7802	14.0626	14.0341	14.3975	14.4905	14.5464	14.8474	Pde4a	0.622295	0.00177093	2.7518	4	4	1	0
Q7TPR4	ACTN1_MOUSE	Actn1	Alpha-actinin-1	270880	250842	360577	233372	313077	358037	581481	489881	18.0473	17.9364	18.4599	17.8323	18.2562	18.4497	19.1494	18.9021	18.0473	17.9364	18.4599	17.8323	18.2562	18.4497	19.1494	18.9021	Actn1	0.620354	0.0454625	1.34235	4	4	1	0
Q3TJD7	PDLI7_MOUSE	Pdlim7	PDZ and LIM domain protein 7	18913.7	14867.1	15034.4	10501.2	18967.9	23316.7	21474	25966.9	14.2071	13.8598	13.876	13.3583	14.2113	14.5091	14.3903	14.6644	14.2071	13.8598	13.876	13.3583	14.2113	14.5091	14.3903	14.6644	Pdlim7	0.618453	0.0211102	1.67551	4	4	1	0
P58871	TB182_MOUSE	Tnks1bp1	182 kDa tankyrase-1-binding protein	13977	16583.9	10987.6	11872.2	18259.4	20423.5	22223.7	20250.1	13.7708	14.0175	13.4236	13.5353	14.1564	14.3179	14.4398	14.3056	13.7708	14.0175	13.4236	13.5353	14.1564	14.3179	14.4398	14.3056	Tnks1bp1	0.618149	0.00514573	2.28855	4	4	1	0
O88907	PIAS1_MOUSE	Pias1	E3 SUMO-protein ligase PIAS1	11527.7	12967.3	15965.5	16008.1	15228.9	25603.7	27937	19459.4	13.4928	13.6626	13.9627	13.9665	13.8945	14.6441	14.7699	14.2482	13.4928	13.6626	13.9627	13.9665	13.8945	14.6441	14.7699	14.2482	Pias1	0.618016	0.0365811	1.43674	4	4	1	0
cRAP-P35527	cRAP-K1C9_HUMAN	cRAP-KRT9	Keratin, type I cytoskeletal 9	139008	64191.8	116460	206296	181751	193469	110483	305096	17.0848	15.9701	16.8295	17.6544	17.4716	17.5617	16.7535	18.2189	17.0848	15.9701	16.8295	17.6544	17.4716	17.5617	16.7535	18.2189	cRAP-KRT9	0.616744	0.229459	0.639295	4	4	1	0
Q62302	TX261_MOUSE	Tex261	Protein TEX261	2150.34			1747.78	3252.04	3335.27		9303.22	11.0703			10.7713	11.6671	11.7036		13.1835	11.0703	12.1943	12.2707	10.7713	11.6671	11.7036	12.2107	13.1835	Tex261	0.614557	0.283378	0.547635	3	2	1	0
Q9CXY6	ILF2_MOUSE	Ilf2	Interleukin enhancer-binding factor 2	453956	380724	408380	412611	497099	684776	669175	701055	18.7922	18.5384	18.6396	18.6544	18.9232	19.3853	19.352	19.4192	18.7922	18.5384	18.6396	18.6544	18.9232	19.3853	19.352	19.4192	Ilf2	0.613771	0.00296349	2.5282	4	4	1	0
Q06890	CLUS_MOUSE	Clu	Clusterin	43261.9	23238.9	35294.7	32896.6	32284.4	43837	61670.8	73253	15.4008	14.5043	15.1072	15.0057	14.9785	15.4199	15.9123	16.1606	15.4008	14.5043	15.1072	15.0057	14.9785	15.4199	15.9123	16.1606	Clu	0.613358	0.105776	0.975614	4	4	1	0
Q14DI0	Q14DI0_MOUSE	Gm49359	Zinc finger protein 935	8999.32		13803.1	4610.02	8440.39	11121.3	17768	8797.12	13.1356		13.7527	12.1706	13.0431	13.441	14.117	13.1028	13.1356	12.1943	13.7527	12.1706	13.0431	13.441	14.117	13.1028	Gm49359	0.612687	0.228978	0.640207	4	3	1	0
Q924T3	XRCC4_MOUSE	Xrcc4	DNA repair protein XRCC4	6338.43	8709.15	7658.21	13449.4	7012.96	19004.3	14299.1	16304.8	12.6299	13.0883	12.9028	13.7153	12.7758	14.214	13.8036	13.993	12.6299	13.0883	12.9028	13.7153	12.7758	14.214	13.8036	13.993	Xrcc4	0.612555	0.169997	0.769558	4	4	1	0
Q8CFE8	Q8CFE8_MOUSE	Fbxw17	F-box and WD-40 domain protein 17		7416.6	13314.4	7299.78	8676.93	9955.35	15639.5	13727.9		12.8565	13.7007	12.8336	13.083	13.2813	13.9329	13.7448	12.2035	12.8565	13.7007	12.8336	13.083	13.2813	13.9329	13.7448	Fbxw17	0.611888	0.14493	0.83884	4	3	1	0
A0A0J9YTU3	A0A0J9YTU3_MOUSE	Specc1	Sperm antigen with calponin homology and coiled-coil domains 1	127466	175969	57004.2	223494	168040	227815	190594	213626	16.9598	17.425	15.7988	17.7699	17.3584	17.7975	17.5401	17.7047	16.9598	17.425	15.7988	17.7699	17.3584	17.7975	17.5401	17.7047	Specc1	0.611862	0.214251	0.669076	4	4	1	0
P70671	IRF3_MOUSE	Irf3	Interferon regulatory factor 3	141484	93128.7	134909	103201	174124	159461	186532	193160	17.1103	16.5069	17.0416	16.6551	17.4098	17.2828	17.5091	17.5594	17.1103	16.5069	17.0416	16.6551	17.4098	17.2828	17.5091	17.5594	Irf3	0.61179	0.00845534	2.07287	4	4	1	0
Q80YQ1	Q80YQ1_MOUSE	Thbs1	Thrombospondin 1	252622	124412	169610	143065	214161	234932	260226	316714	17.9466	16.9248	17.3719	17.1263	17.7083	17.8419	17.9894	18.2728	17.9466	16.9248	17.3719	17.1263	17.7083	17.8419	17.9894	18.2728	Thbs1	0.610722	0.0517099	1.28643	4	4	1	0
Q3TPE9	ANKY2_MOUSE	Ankmy2	Ankyrin repeat and MYND domain-containing protein 2	20092.6	26374.7	26565.8	29628.9	51148.7	32628.8	39103.5	34730.5	14.2944	14.6869	14.6973	14.8547	15.6424	14.9939	15.255	15.0839	14.2944	14.6869	14.6973	14.8547	15.6424	14.9939	15.255	15.0839	Ankmy2	0.610488	0.0170054	1.76941	4	4	1	0
G3UZ78	ADGB_MOUSE	Adgb	Androglobin			23076.3			21026.7	27803.7				14.4941			14.3599	14.763		12.2035	12.1943	14.4941	12.2163	12.0989	14.3599	14.763	12.3248	Adgb	0.609593	0.520081	0.283929	2	1	1	0
P07759	SPA3K_MOUSE	Serpina3k	Serine protease inhibitor A3K	9564.45	13114.6	19406.1	8911.38	15237.1	15128.4	19937.4	25373.8	13.2235	13.6789	14.2442	13.1214	13.8953	13.885	14.2832	14.6311	13.2235	13.6789	14.2442	13.1214	13.8953	13.885	14.2832	14.6311	Serpina3k	0.606626	0.100026	0.999885	4	4	1	0
Q9CR13	FMC1_MOUSE	Fmc1	Protein FMC1 homolog	18498.7	14517.4	29772.5	16771.8	18612.8	30964.2	41616.5	29966.8	14.1751	13.8255	14.8617	14.0337	14.184	14.9183	15.3449	14.8711	14.1751	13.8255	14.8617	14.0337	14.184	14.9183	15.3449	14.8711	Fmc1	0.605548	0.114951	0.939489	4	4	1	0
Q9D3R3	CEP72_MOUSE	Cep72	Centrosomal protein of 72 kDa	19995.7	17021.8	19260.8	14695.2	16192.7	27726.6	36075.8	31828.3	14.2874	14.0551	14.2334	13.8431	13.9831	14.759	15.1387	14.958	14.2874	14.0551	14.2334	13.8431	13.9831	14.759	15.1387	14.958	Cep72	0.604967	0.0688894	1.16185	4	4	1	0
Q9JJG9	NOA1_MOUSE	Noa1	Nitric oxide-associated protein 1	30056.5	31373.1	35053.4	17662.6	37567.7	40991.6	42946.2	47070.1	14.8754	14.9372	15.0973	14.1084	15.1972	15.323	15.3902	15.5225	14.8754	14.9372	15.0973	14.1084	15.1972	15.323	15.3902	15.5225	Noa1	0.603676	0.0397002	1.40121	4	4	1	0
Q9QXB9	DRG2_MOUSE	Drg2	Developmentally-regulated GTP-binding protein 2	98589.9	105404	95209.9	98028.4	114814	144994	180804	171791	16.5892	16.6856	16.5388	16.5809	16.8089	17.1456	17.4641	17.3903	16.5892	16.6856	16.5388	16.5809	16.8089	17.1456	17.4641	17.3903	Drg2	0.603619	0.00712373	2.14729	4	4	1	0
P11930	NUD19_MOUSE	Nudt19	Acyl-coenzyme A diphosphatase NUDT19	13724.5	14065.6	13363.5	9359.62	16843.6	23120.5	15046.8	21955.2	13.7445	13.7799	13.706	13.1922	14.0399	14.4969	13.8772	14.4223	13.7445	13.7799	13.706	13.1922	14.0399	14.4969	13.8772	14.4223	Nudt19	0.603412	0.0251851	1.59886	4	4	1	0
G3XA59	LRC32_MOUSE	Lrrc32	Transforming growth factor beta activator LRRC32	2643.28			4971.84	4623.07	8545.54	6008.17	6826.2	11.3681			12.2796	12.1746	13.061	12.5527	12.7369	11.3681	12.1943	12.2707	12.2796	12.1746	13.061	12.5527	12.7369	Lrrc32	0.603105	0.0811896	1.0905	4	2	1	0
B2RY53	B2RY53_MOUSE	Gm6133	Large ribosomal subunit protein uL22	486.034	1113.82	1028.28	724.755	984.036	721.071	587.34		8.92491	10.1213	10.006	9.50135	9.94257	9.494	9.19805		8.92491	10.1213	10.006	9.50135	9.94257	9.494	9.19805	12.3248	Gm6133	0.601467	0.460139	0.337111	3	4	1	0
E9PZ21	E9PZ21_MOUSE	Rbms1	RNA binding motif, single stranded interacting protein 1	44103.8	38395.4	33356.2	26566.8	51213.4	59825.1	57354.5	44986.6	15.4286	15.2286	15.0257	14.6973	15.6442	15.8685	15.8076	15.4572	15.4286	15.2286	15.0257	14.6973	15.6442	15.8685	15.8076	15.4572	Rbms1	0.599315	0.0162554	1.789	4	4	1	0
O35280	CHK1_MOUSE	Chek1	Serine/threonine-protein kinase Chk1	38448.8	53623.4	57434.2	42281.1	59358.4	65057	84377.7	80492.9	15.2307	15.7106	15.8096	15.3677	15.8572	15.9894	16.3646	16.2966	15.2307	15.7106	15.8096	15.3677	15.8572	15.9894	16.3646	16.2966	Chek1	0.597289	0.0173233	1.76137	4	4	1	0
Q3TJM4	CENPT_MOUSE	Cenpt	Centromere protein T	21985	22215.2	22175.8	24706.2	34679.1	33534.3	36578.2	32864.1	14.4242	14.4393	14.4367	14.5926	15.0818	15.0333	15.1587	15.0042	14.4242	14.4393	14.4367	14.5926	15.0818	15.0333	15.1587	15.0042	Cenpt	0.596319	2.72549e-05	4.56455	4	4	1	0
Q80XR8	Q80XR8_MOUSE	Git2	G protein-coupled receptor kinase-interactor 2	53817.3	43679.1	27019.2	36601.1	59726.6	66773.1	65524.3	46449.7	15.7158	15.4147	14.7217	15.1596	15.8661	16.027	15.9997	15.5034	15.7158	15.4147	14.7217	15.1596	15.8661	16.027	15.9997	15.5034	Git2	0.596114	0.0492134	1.30792	4	4	1	0
Q5XKN4	JAGN1_MOUSE	Jagn1	Protein jagunal homolog 1	82173.8	78784.9	53788.8	89564.7	143171	108475	134769	77802.5	16.3264	16.2656	15.715	16.4506	17.1274	16.727	17.0401	16.2475	16.3264	16.2656	15.715	16.4506	17.1274	16.727	17.0401	16.2475	Jagn1	0.596089	0.0594762	1.22566	4	4	1	0
A2A6Q5	CDC27_MOUSE	Cdc27	Cell division cycle protein 27 homolog	5218.56		11737.9	14132.1	7366.31	9600.62	15700.1	19005.2	12.3494		13.5189	13.7867	12.8467	13.2289	13.9385	14.2141	12.3494	12.1943	13.5189	13.7867	12.8467	13.2289	13.9385	14.2141	Cdc27	0.594722	0.289423	0.538467	4	3	1	0
O35047	HOP2_MOUSE	Psmc3ip	Homologous-pairing protein 2 homolog	20810.6	18094.5	15611.2	16110.1	25776.1	35348.4	24014.8	22501.5	14.345	14.1433	13.9303	13.9757	14.6537	15.1094	14.5516	14.4577	14.345	14.1433	13.9303	13.9757	14.6537	15.1094	14.5516	14.4577	Psmc3ip	0.594552	0.013633	1.86541	4	4	1	0
Q9CY64	BIEA_MOUSE	Blvra	Biliverdin reductase A	130027	119885	123253	106529	146930	217431	219374	151010	16.9885	16.8713	16.9113	16.7009	17.1648	17.7302	17.743	17.2043	16.9885	16.8713	16.9113	16.7009	17.1648	17.7302	17.743	17.2043	Blvra	0.592598	0.0133041	1.87602	4	4	1	0
Q9D1H7	GET4_MOUSE	Get4	Golgi to ER traffic protein 4 homolog	31299.3	34705.8	44722.8	32446.5	52590.3	65777.1	61762.1	38140.1	14.9338	15.0829	15.4487	14.9858	15.6825	16.0053	15.9144	15.219	14.9338	15.0829	15.4487	14.9858	15.6825	16.0053	15.9144	15.219	Get4	0.592508	0.0306597	1.51343	4	4	1	0
Q8K209	AGRG1_MOUSE	Adgrg1	Adhesion G-protein coupled receptor G1	42934.2	28384.3	41299.7	29902	37032.1	48759.5	65421.4	65762	15.3898	14.7928	15.3338	14.868	15.1765	15.5734	15.9975	16.005	15.3898	14.7928	15.3338	14.868	15.1765	15.5734	15.9975	16.005	Adgrg1	0.591971	0.056626	1.24698	4	4	1	0
Q8K031	STAR8_MOUSE	Stard8	StAR-related lipid transfer protein 8							18819.4	7021.37							14.1999	12.7775	12.2035	12.1943	12.2707	12.2163	12.0989	12.1714	14.1999	12.7775	Stard8	0.590707	0.271032	0.56698	2	0	1	0
P70280	VAMP7_MOUSE	Vamp7	Vesicle-associated membrane protein 7	30045	20618.8	23395.4	19994.6	47732.5	37062.6	28059.3	29711	14.8748	14.3317	14.5139	14.2873	15.5427	15.1777	14.7762	14.8587	14.8748	14.3317	14.5139	14.2873	15.5427	15.1777	14.7762	14.8587	Vamp7	0.586873	0.0369203	1.43273	4	4	1	0
Q9JIM1	S29A1_MOUSE	Slc29a1	Equilibrative nucleoside transporter 1	30999.6	34326.4	33362.2	33690.9	40223.5	53429.3	48881.2	57913.3	14.92	15.067	15.0259	15.0401	15.2958	15.7053	15.577	15.8216	14.92	15.067	15.0259	15.0401	15.2958	15.7053	15.577	15.8216	Slc29a1	0.586676	0.00247339	2.60671	4	4	1	0
Q61216	MRE11_MOUSE	Mre11	Double-strand break repair protein MRE11	51079.5	58118.2	68071.4	65037.5	70714	79962	64469.5	183061	15.6405	15.8267	16.0548	15.989	16.1097	16.287	15.9763	17.482	15.6405	15.8267	16.0548	15.989	16.1097	16.287	15.9763	17.482	Mre11	0.586031	0.152258	0.81742	4	4	1	0
Q99LD4	CSN1_MOUSE	Gps1	COP9 signalosome complex subunit 1	87937.2	80031.8	89419.1	101431	106838	134359	144071	156661	16.4242	16.2883	16.4483	16.6301	16.7051	17.0357	17.1364	17.2573	16.4242	16.2883	16.4483	16.6301	16.7051	17.0357	17.1364	17.2573	Gps1	0.5859	0.00536562	2.27038	4	4	1	0
Q9QY36	NAA10_MOUSE	Naa10	N-alpha-acetyltransferase 10	612182	487388	488741	516822	734545	820174	861741	733744	19.2236	18.8947	18.8987	18.9793	19.4865	19.6456	19.7169	19.4849	19.2236	18.8947	18.8987	18.9793	19.4865	19.6456	19.7169	19.4849	Naa10	0.584386	0.000936061	3.0287	4	4	1	0
E9PV86	MCTP1_MOUSE	Mctp1	Multiple C2 and transmembrane domain-containing protein 1	6323.04	4920.38	4804.31	7750.51	9973.82	8908.93	7425.12	8834.95	12.6264	12.2646	12.2301	12.9201	13.2839	13.121	12.8582	13.109	12.6264	12.2646	12.2301	12.9201	13.2839	13.121	12.8582	13.109	Mctp1	0.582757	0.0200282	1.69836	4	4	1	0
B1APX2	B1APX2_MOUSE	5031439G07Rik	RIKEN cDNA 5031439G07 gene	56435.2	55044.1	65431.9	65014.6	88405.5	83922.5	96545.5	92327.5	15.7843	15.7483	15.9977	15.9885	16.4318	16.3568	16.5589	16.4945	15.7843	15.7483	15.9977	15.9885	16.4318	16.3568	16.5589	16.4945	5031439G07Rik	0.580806	0.000320035	3.4948	4	4	1	0
Q8BYW9	EOGT_MOUSE	Eogt	EGF domain-specific O-linked N-acetylglucosamine transferase	10528.2	5083.15		7364.45	10984.8	10204.2	7392.76	11741.8	13.362	12.3115		12.8464	13.4232	13.3169	12.8519	13.5194	13.362	12.3115	12.2707	12.8464	13.4232	13.3169	12.8519	13.5194	Eogt	0.580196	0.0984142	1.00694	4	3	1	0
Q4VA93	Q4VA93_MOUSE	Prkca	Protein kinase C	22524.4	8740.73	10705.5		10040.8	13723.8	18232.9	19893.2	14.4592	13.0935	13.3861		13.2936	13.7444	14.1543	14.28	14.4592	13.0935	13.3861	12.2163	13.2936	13.7444	14.1543	14.28	Prkca	0.579277	0.302385	0.51944	4	3	1	0
O35744	CHIL3_MOUSE	Chil3	Chitinase-like protein 3	2754000	3628550	2306550	2202130	7126020	3240490	3268980	3345310	21.3931	21.791	21.1373	21.0705	22.7647	21.6278	21.6404	21.6737	21.3931	21.791	21.1373	21.0705	22.7647	21.6278	21.6404	21.6737	Chil3	0.578683	0.124019	0.90651	4	4	1	0
Q9DCV4	RMD1_MOUSE	Rmdn1	Regulator of microtubule dynamics protein 1	5436.81	6674.39			10990.7	6752.07	5674.1	10074.7	12.4085	12.7044			13.424	12.7211	12.4702	13.2984	12.4085	12.7044	12.2707	12.2163	13.424	12.7211	12.4702	13.2984	Rmdn1	0.57843	0.0623318	1.20529	4	2	1	0
A0A0R4J1Q0	A0A0R4J1Q0_MOUSE	Edc4	Enhancer of mRNA-decapping protein 4	15119.7	11347.6	9961.54	9635.42	15520.6	16495	21021.9	15198.9	13.8841	13.4701	13.2822	13.2341	13.9219	14.0097	14.3596	13.8917	13.8841	13.4701	13.2822	13.2341	13.9219	14.0097	14.3596	13.8917	Edc4	0.578099	0.0195332	1.70923	4	4	1	0
Q923J1	TRPM7_MOUSE	Trpm7	Transient receptor potential cation channel subfamily M member 7	7633.95	9586.66	9988.86		6361.28	12795.2	16894.4	12532.3	12.8982	13.2268	13.2861		12.6351	13.6433	14.0443	13.6134	12.8982	13.2268	13.2861	12.2163	12.6351	13.6433	14.0443	13.6134	Trpm7	0.577149	0.186734	0.728777	4	3	1	0
Q8BH26	LYSET_MOUSE	Lyset	Lysosomal enzyme trafficking factor	22726.3	43954.8	55290.7	47123.3	51160.9	51636	61384.9	79438.2	14.4721	15.4237	15.7547	15.5242	15.6428	15.6561	15.9056	16.2775	14.4721	15.4237	15.7547	15.5242	15.6428	15.6561	15.9056	16.2775	Lyset	0.576819	0.120732	0.918179	4	4	1	0
P83882	RL36A_MOUSE	Rpl36a	Large ribosomal subunit protein eL42	1541990	1104720	980578	1078280	1678650	1562860	1878220	1806820	20.5564	20.0752	19.9033	20.0403	20.6789	20.5758	20.8409	20.785	20.5564	20.0752	19.9033	20.0403	20.6789	20.5758	20.8409	20.785	Rpl36a	0.57635	0.00961097	2.01723	4	4	1	0
Q07235	GDN_MOUSE	Serpine2	Glia-derived nexin	216508	136201	256834	124203	215467	239035	281285	320560	17.7241	17.0554	17.9705	16.9223	17.7171	17.8669	18.1017	18.2902	17.7241	17.0554	17.9705	16.9223	17.7171	17.8669	18.1017	18.2902	Serpine2	0.575905	0.0889798	1.05071	4	4	1	0
G5E897	PLGT3_MOUSE	Poglut3	Protein O-glucosyltransferase 3	17202.6	28968.9	35425.1	28714.9	29726.4	42091.7	48566	41134.1	14.0703	14.8222	15.1125	14.8095	14.8595	15.3612	15.5677	15.328	14.0703	14.8222	15.1125	14.8095	14.8595	15.3612	15.5677	15.328	Poglut3	0.575465	0.0754063	1.12259	4	4	1	0
Q3USJ8	FCSD2_MOUSE	Fchsd2	F-BAR and double SH3 domains protein 2	6746.73	6438.85	9531.95	6091.51	9637.8	10179.2	10704.5	11828.1	12.72	12.6526	13.2186	12.5726	13.2345	13.3133	13.3859	13.5299	12.72	12.6526	13.2186	12.5726	13.2345	13.3133	13.3859	13.5299	Fchsd2	0.574996	0.0110412	1.95698	4	4	1	0
E9PWL0	E9PWL0_MOUSE	Trim30d	Tripartite motif-containing 30D	6566.93	8148.34	6139.76	7383.6	8746.34	13141.1	9678.11	10735.6	12.681	12.9923	12.584	12.8501	13.0945	13.6818	13.2405	13.3901	12.681	12.9923	12.584	12.8501	13.0945	13.6818	13.2405	13.3901	Trim30d	0.574879	0.00989508	2.00458	4	4	1	0
Q8C267	SETB2_MOUSE	Setdb2	Histone-lysine N-methyltransferase SETDB2		4872.74	3923.15	4768.69	4217	6902.8	8092	8925.6		12.2505	11.9378	12.2194	12.042	12.753	12.9823	13.1237	12.2035	12.2505	11.9378	12.2194	12.042	12.753	12.9823	13.1237	Setdb2	0.572441	0.062643	1.20313	4	3	1	0
Q60665	SKIL_MOUSE	Skil	Ski-like protein	15819.2	49969.6		84951.4	74471	24594.7	16357.7	53973.3	13.9494	15.6088		16.3744	16.1844	14.5861	13.9977	15.72	13.9494	15.6088	12.2707	16.3744	16.1844	14.5861	13.9977	15.72	Skil	0.571213	0.603525	0.219304	4	3	1	0
Q8K1A6	C2D1A_MOUSE	Cc2d1a	Coiled-coil and C2 domain-containing protein 1A	19939.8	44201.7	31862.7	41202	50903.2	44245.7	49887.9	50181.6	14.2834	15.4318	14.9596	15.3304	15.6355	15.4332	15.6064	15.6149	14.2834	15.4318	14.9596	15.3304	15.6355	15.4332	15.6064	15.6149	Cc2d1a	0.571202	0.0738093	1.13189	4	4	1	0
Q5M956	KCTD1_MOUSE	Kctd1	BTB/POZ domain-containing protein KCTD1	27147.8	29574.4	12274.6	22633.1	26981	30379.9	35050.7	37662.7	14.7285	14.8521	13.5834	14.4661	14.7197	14.8908	15.0972	15.2008	14.7285	14.8521	13.5834	14.4661	14.7197	14.8908	15.0972	15.2008	Kctd1	0.569587	0.111733	0.951818	4	4	1	0
P32037	GTR3_MOUSE	Slc2a3	Solute carrier family 2, facilitated glucose transporter member 3	33362.6	17289.9	20980.1	19517.6	26789.7	29362.5	34905.6	41719.9	15.0259	14.0776	14.3567	14.2525	14.7094	14.8417	15.0912	15.3484	15.0259	14.0776	14.3567	14.2525	14.7094	14.8417	15.0912	15.3484	Slc2a3	0.569472	0.0636903	1.19593	4	4	1	0
A2AR07	A2AR07_MOUSE	Ssb	Small RNA binding exonuclease protection factor La (Fragment)	12371.8	12049.6			15659.7	9181.44	7504.21	15630.9	13.5948	13.5567			13.9348	13.1645	12.8735	13.9321	13.5948	13.5567	12.2707	12.2163	13.9348	13.1645	12.8735	13.9321	Ssb	0.566589	0.273773	0.562609	4	2	1	0
Q9CX11	UTP23_MOUSE	Utp23	rRNA-processing protein UTP23 homolog	13932.3	19396.8	11497.6	19744	20768.4	28726	19302.7	25595.2	13.7661	14.2435	13.489	14.2691	14.3421	14.8101	14.2365	14.6436	13.7661	14.2435	13.489	14.2691	14.3421	14.8101	14.2365	14.6436	Utp23	0.566106	0.0503336	1.29814	4	4	1	0
Q8BKZ9	ODPX_MOUSE	Pdhx	Pyruvate dehydrogenase protein X component, mitochondrial	43592.5	42280.2	42769.8	41325.1	54609.9	62855.1	62739.2	72568.5	15.4118	15.3677	15.3843	15.3347	15.7369	15.9397	15.9371	16.1471	15.4118	15.3677	15.3843	15.3347	15.7369	15.9397	15.9371	16.1471	Pdhx	0.565557	0.00056659	3.24673	4	4	1	0
B1AVZ0	UPP_MOUSE	Uprt	Uracil phosphoribosyltransferase homolog	63796	51715	64835.9	39740.3	88864.7	87203.6	87826.1	59827.7	15.9612	15.6583	15.9845	15.2783	16.4393	16.4121	16.4224	15.8685	15.9612	15.6583	15.9845	15.2783	16.4393	16.4121	16.4224	15.8685	Uprt	0.565004	0.0397416	1.40075	4	4	1	0
Q8CD92	TTC27_MOUSE	Ttc27	Tetratricopeptide repeat protein 27	73102.3	58695.8	66202.4	52075.7	81748.4	82055	102707	102817	16.1576	15.841	16.0146	15.6683	16.3189	16.3243	16.6482	16.6497	16.1576	15.841	16.0146	15.6683	16.3189	16.3243	16.6482	16.6497	Ttc27	0.564896	0.00731276	2.13592	4	4	1	0
Q3TC72	FAH2A_MOUSE	Fahd2a	Oxaloacetate tautomerase Fahd2a, mitochondrial	28785.4	26210.2	24053.1	25621.1	26442.1	36073	46100.8	50588.6	14.813	14.6778	14.5539	14.645	14.6905	15.1386	15.4925	15.6265	14.813	14.6778	14.5539	14.645	14.6905	15.1386	15.4925	15.6265	Fahd2a	0.564585	0.0399179	1.39883	4	4	1	0
Q8BFP9	PDK1_MOUSE	Pdk1	[Pyruvate dehydrogenase (acetyl-transferring)] kinase isozyme 1, mitochondrial	42003.6	30326.9	20822.2	28236.9	44688.1	35242.6	41743.5	54258.8	15.3582	14.8883	14.3458	14.7853	15.4476	15.105	15.3493	15.7276	15.3582	14.8883	14.3458	14.7853	15.4476	15.105	15.3493	15.7276	Pdk1	0.562951	0.0608377	1.21583	4	4	1	0
Q8R0T6	AGRG3_MOUSE	Adgrg3	Adhesion G protein-coupled receptor G3	87705.8	70883.3	85267.8	86043.3	111600	143388	93608.4	144939	16.4204	16.1132	16.3797	16.3928	16.768	17.1296	16.5144	17.1451	16.4204	16.1132	16.3797	16.3928	16.768	17.1296	16.5144	17.1451	Adgrg3	0.562737	0.015552	1.80821	4	4	1	0
Q9CQT5	POMP_MOUSE	Pomp	Proteasome maturation protein		4952.75	6188.31	9095.4		9892.22	11496.3	12518.8		12.274	12.5953	13.1509		13.2721	13.4889	13.6118	12.2035	12.274	12.5953	13.1509	12.0989	13.2721	13.4889	13.6118	Pomp	0.561973	0.218108	0.661329	3	3	1	0
Q69ZB0	LRCC1_MOUSE	Lrrcc1	Leucine-rich repeat and coiled-coil domain-containing protein 1	3878.91		2323.29		7568.72	6366.81	3854.67		11.9214		11.182		12.8858	12.6364	11.9124		11.9214	12.1943	11.182	12.2163	12.8858	12.6364	11.9124	12.3248	Lrrcc1	0.561344	0.130067	0.885831	3	2	1	0
Q14B98	SESQ2_MOUSE	Pheta2	Sesquipedalian-2	17571.1	21975.3	18077.4	9928.37	19882.1	24742.8	24662.1	27085	14.1009	14.4236	14.1419	13.2773	14.2792	14.5947	14.59	14.7252	14.1009	14.4236	14.1419	13.2773	14.2792	14.5947	14.59	14.7252	Pheta2	0.561341	0.0779405	1.10824	4	4	1	0
Q3T9E4;Q62293	TGTP1_MOUSE;TGTP2_MOUSE	Tgtp1;Tgtp2	T-cell-specific guanine nucleotide triphosphate-binding protein 2	18654.2	24057	27124.1	31079.6	22609.6	27243.2	39591	73499.6	14.1872	14.5542	14.7273	14.9237	14.4646	14.7336	15.2729	16.1654	14.1872	14.5542	14.7273	14.9237	14.4646	14.7336	15.2729	16.1654	Tgtp1;Tgtp2	0.56106	0.216692	0.664156	4	4	1	0
Q9CQF0	RM11_MOUSE	Mrpl11	Large ribosomal subunit protein uL11m	44811.2	34499.1	38075	47458.6	60447.7	69106	64393.7	49192.4	15.4516	15.0743	15.2166	15.5344	15.8834	16.0765	15.9746	15.5861	15.4516	15.0743	15.2166	15.5344	15.8834	16.0765	15.9746	15.5861	Mrpl11	0.56098	0.00948987	2.02274	4	4	1	0
A0A140LHT6;E9QPQ8	A0A140LHT6_MOUSE;E9QPQ8_MOUSE	Mrpl48	Mitochondrial ribosomal protein L48	46068	52158.2	37298	47627.4	60320.9	82487.2	67748.1	59921.6	15.4915	15.6706	15.1868	15.5395	15.8804	16.3319	16.0479	15.8708	15.4915	15.6706	15.1868	15.5395	15.8804	16.3319	16.0479	15.8708	Mrpl48	0.560634	0.0092501	2.03385	4	4	1	0
Q9CR00	PSMD9_MOUSE	Psmd9	26S proteasome non-ATPase regulatory subunit 9	286880	239495	165163	192489	298408	299174	320555	360566	18.1301	17.8696	17.3335	17.5544	18.1869	18.1906	18.2902	18.4599	18.1301	17.8696	17.3335	17.5544	18.1869	18.1906	18.2902	18.4599	Psmd9	0.559999	0.0238192	1.62307	4	4	1	0
Q8BX07	CTDS2_MOUSE	Ctdsp2	Carboxy-terminal domain RNA polymerase II polypeptide A small phosphatase 2	11888	13967.8	15117.6	19665.6	20566.6	21376.9	21476.6	24486.4	13.5372	13.7698	13.8839	14.2634	14.328	14.3838	14.3905	14.5797	13.5372	13.7698	13.8839	14.2634	14.328	14.3838	14.3905	14.5797	Ctdsp2	0.556897	0.0135443	1.86824	4	4	1	0
Q6VYH9	HSH2D_MOUSE	Hsh2d	Hematopoietic SH2 domain-containing protein	7406.66	4488.4	7975.04	4080.67		8050.28	10623.5	13495.7	12.8546	12.132	12.9613	11.9946		12.9748	13.375	13.7202	12.8546	12.132	12.9613	11.9946	12.0989	12.9748	13.375	13.7202	Hsh2d	0.556615	0.240681	0.618557	3	4	1	0
Q9QX60	DGUOK_MOUSE	Dguok	Deoxyguanosine kinase, mitochondrial	15614.2					16022.9	22126.8		13.9306					13.9678	14.4335		13.9306	12.1943	12.2707	12.2163	12.0989	13.9678	14.4335	12.3248	Dguok	0.553286	0.472994	0.325144	2	1	1	0
Q9CWY9	RIP_MOUSE	Rpain	RPA-interacting protein								25065.6								14.6134	12.2035	12.1943	12.2707	12.2163	12.0989	12.1714	12.2107	14.6134	Rpain	0.552375	0.402938	0.394762	1	0	0	0
P83877	TXN4A_MOUSE	Txnl4a	Thioredoxin-like protein 4A	34615.8	49755.4	46397.8	38299	63958.2	60442	67482.9	53871.1	15.0791	15.6026	15.5018	15.225	15.9648	15.8833	16.0422	15.7172	15.0791	15.6026	15.5018	15.225	15.9648	15.8833	16.0422	15.7172	Txnl4a	0.549767	0.00764364	2.1167	4	4	1	0
O08997	ATOX1_MOUSE	Atox1	Copper transport protein ATOX1	201905	197200	257948	164976	225822	215157	380958	419683	17.6233	17.5893	17.9767	17.3319	17.7848	17.715	18.5393	18.6789	17.6233	17.5893	17.9767	17.3319	17.7848	17.715	18.5393	18.6789	Atox1	0.549209	0.100362	0.998432	4	4	1	0
Q99JP4	CDC26_MOUSE	Cdc26	Anaphase-promoting complex subunit CDC26	63237.3	59994.3	65401.3	76272.9	93683.5	96334.3	90416.4	106218	15.9485	15.8725	15.997	16.2189	16.5155	16.5558	16.4643	16.6967	15.9485	15.8725	15.997	16.2189	16.5155	16.5558	16.4643	16.6967	Cdc26	0.548824	0.000864237	3.06337	4	4	1	0
Q9DC37	MFSD1_MOUSE	Mfsd1	Lysosomal dipeptide transporter MFSD1	71890	67052.1	56840.9	58633.2	103264	93583.4	106894	70870.6	16.1335	16.033	15.7946	15.8394	16.656	16.514	16.7058	16.1129	16.1335	16.033	15.7946	15.8394	16.656	16.514	16.7058	16.1129	Mfsd1	0.547023	0.0128726	1.89033	4	4	1	0
Q99LH9	3BP5L_MOUSE	Sh3bp5l	SH3 domain-binding protein 5-like	11318.6	11170.1	9524.31		9797.91	10646.7	16653.8	15013.6	13.4664	13.4474	13.2174		13.2583	13.3781	14.0236	13.874	13.4664	13.4474	13.2174	12.2163	13.2583	13.3781	14.0236	13.874	Sh3bp5l	0.546612	0.168745	0.77277	4	3	1	0
Q8K2D6	DCTD_MOUSE	Dctd	Deoxycytidylate deaminase	17754	10000.4	15558.6	11096.1	17499	16701.8	23014	20739.4	14.1159	13.2878	13.9254	13.4378	14.095	14.0277	14.4902	14.3401	14.1159	13.2878	13.9254	13.4378	14.095	14.0277	14.4902	14.3401	Dctd	0.546549	0.0503053	1.29839	4	4	1	0
Q9CY25	MIS12_MOUSE	Mis12	Protein MIS12 homolog	61033.1	73603	42960.2	49855.3	68856.7	78228.3	86217.3	94145.9	15.8973	16.1675	15.3907	15.6055	16.0713	16.2554	16.3957	16.5226	15.8973	16.1675	15.3907	15.6055	16.0713	16.2554	16.3957	16.5226	Mis12	0.546015	0.0313158	1.50424	4	4	1	0
Q8BVF7	APH1A_MOUSE	Aph1a	Gamma-secretase subunit APH-1A		14537.8	16060.5	22355.4	21545.4	15520.1	17614.2	18979.7		13.8275	13.9712	14.4483	14.3951	13.9219	14.1045	14.2122	12.2035	13.8275	13.9712	14.4483	14.3951	13.9219	14.1045	14.2122	Aph1a	0.545738	0.315202	0.501411	4	3	1	0
Q9WTU0	PHF2_MOUSE	Phf2	Lysine-specific demethylase PHF2	34659.2	30511.7	33632.3	33966.5	55809.1	44966.9	43810.8	49718.7	15.081	14.8971	15.0376	15.0518	15.7682	15.4566	15.419	15.6015	15.081	14.8971	15.0376	15.0518	15.7682	15.4566	15.419	15.6015	Phf2	0.54447	0.000887921	3.05163	4	4	1	0
Q9ES46	PARVB_MOUSE	Parvb	Beta-parvin	63912	51309.2	50483.4	55252.2	51147.9	66715.5	104989	115089	15.9638	15.6469	15.6235	15.7537	15.6424	16.0257	16.6799	16.8124	15.9638	15.6469	15.6235	15.7537	15.6424	16.0257	16.6799	16.8124	Parvb	0.543099	0.107022	0.970526	4	4	1	0
Q3UWW6	GA2L3_MOUSE	Gas2l3	GAS2-like protein 3	10904.9	9280.11	9695.99	11195	15989.8	13055.6	14616	16216.1	13.4127	13.1799	13.2432	13.4506	13.9649	13.6724	13.8353	13.9851	13.4127	13.1799	13.2432	13.4506	13.9649	13.6724	13.8353	13.9851	Gas2l3	0.542823	0.00140599	2.85202	4	4	1	0
Q505B8	SYCE2_MOUSE	Syce2	Synaptonemal complex central element protein 2		16566.4	22532.4	14648.5	14838.1	21890.9	17598.8	20303.3		14.016	14.4597	13.8385	13.857	14.418	14.1032	14.3094	12.2035	14.016	14.4597	13.8385	13.857	14.418	14.1032	14.3094	Syce2	0.542501	0.326795	0.485725	4	3	1	0
Q9D7B6	ACAD8_MOUSE	Acad8	Isobutyryl-CoA dehydrogenase, mitochondrial	53967.9	33162.7	32721.8	32264	48128.8	59109.8	54978	54341.1	15.7198	15.0173	14.998	14.9776	15.5546	15.8511	15.7466	15.7298	15.7198	15.0173	14.998	14.9776	15.5546	15.8511	15.7466	15.7298	Acad8	0.542339	0.0295275	1.52977	4	4	1	0
Q8BJ34	MARF1_MOUSE	Marf1	Meiosis regulator and mRNA stability factor 1	15755.8	24992.9	32277.1	21034.8	18555.5	36391.8	43527.8	40862.7	13.9436	14.6092	14.9782	14.3605	14.1796	15.1513	15.4096	15.3185	13.9436	14.6092	14.9782	14.3605	14.1796	15.1513	15.4096	15.3185	Marf1	0.541873	0.180062	0.744577	4	4	1	0
P47856	GFPT1_MOUSE	Gfpt1	Glutamine--fructose-6-phosphate aminotransferase [isomerizing] 1	223113	129083	161336	96438.7	214336	198779	207506	227650	17.7674	16.9779	17.2997	16.5573	17.7095	17.6008	17.6628	17.7965	17.7674	16.9779	17.2997	16.5573	17.7095	17.6008	17.6628	17.7965	Gfpt1	0.541796	0.0813717	1.08953	4	4	1	0
Q9D5Y0	SMIP4_MOUSE	Spmip4	Sperm-associated microtubule inner protein 4					20795.5								14.344				12.2035	12.1943	12.2707	12.2163	14.344	12.1714	12.2107	12.3248	Spmip4	0.541496	0.344966	0.462223	1	0	0	0
P70704	AT8A1_MOUSE	Atp8a1	Phospholipid-transporting ATPase IA	37143.4	38844.7	54201.1	30823.1	41857.3	40503.5	77519	82182.6	15.1808	15.2454	15.726	14.9117	15.3532	15.3058	16.2423	16.3265	15.1808	15.2454	15.726	14.9117	15.3532	15.3058	16.2423	16.3265	Atp8a1	0.540938	0.146269	0.834847	4	4	1	0
P97360	ETV6_MOUSE	Etv6	Transcription factor ETV6	96634.6	116250	127465	123066	155052	161187	174932	180097	16.5603	16.8269	16.9597	16.9091	17.2424	17.2984	17.4164	17.4584	16.5603	16.8269	16.9597	16.9091	17.2424	17.2984	17.4164	17.4584	Etv6	0.53992	0.00185411	2.73186	4	4	1	0
E9Q166	E9Q166_MOUSE	Atad2b	ATPase family, AAA domain containing 2B	184003	127088	214656	91042.5	109238	253120	282250	260909	17.4894	16.9555	17.7117	16.4743	16.7371	17.9495	18.1066	17.9932	17.4894	16.9555	17.7117	16.4743	16.7371	17.9495	18.1066	17.9932	Atad2b	0.538905	0.25158	0.599324	4	4	1	0
Q6Q477	AT2B4_MOUSE	Atp2b4	Plasma membrane calcium-transporting ATPase 4	23698.1	16856	15808.7	13253.9	30813.2	22743	21218.5	25048.7	14.5325	14.041	13.9484	13.6941	14.9113	14.4731	14.373	14.6124	14.5325	14.041	13.9484	13.6941	14.9113	14.4731	14.373	14.6124	Atp2b4	0.538465	0.0433665	1.36285	4	4	1	0
Q8C561	LMBD2_MOUSE	Lmbrd2	G-protein coupled receptor-associated protein LMBRD2	5364.92	5837.96	4431.19	5433.65	5783.32	9086.5	8167.61	7778.86	12.3893	12.5112	12.1135	12.4077	12.4977	13.1495	12.9957	12.9253	12.3893	12.5112	12.1135	12.4077	12.4977	13.1495	12.9957	12.9253	Lmbrd2	0.536615	0.0167344	1.77639	4	4	1	0
Q9DB73	NB5R1_MOUSE	Cyb5r1	NADH-cytochrome b5 reductase 1	184579	86639	131863	171505	231385	186514	175080	211625	17.4939	16.4027	17.0087	17.3879	17.8199	17.5089	17.4177	17.6912	17.4939	16.4027	17.0087	17.3879	17.8199	17.5089	17.4177	17.6912	Cyb5r1	0.536122	0.0872611	1.05918	4	4	1	0
Q9WUK6	ZBT18_MOUSE	Zbtb18	Zinc finger and BTB domain-containing protein 18		5588.62	9260.1	7434.59	7146.89	11677.2	11721.7	8199.89		12.4483	13.1768	12.86	12.8031	13.5114	13.5169	13.0014	12.2035	12.4483	13.1768	12.86	12.8031	13.5114	13.5169	13.0014	Zbtb18	0.536035	0.105979	0.974782	4	3	1	0
O35153	BET1L_MOUSE	Bet1l	BET1-like protein	83354.1	61913.1	30112.4	87940	103866	82353.6	73441.7	96143.8	16.347	15.918	14.8781	16.4242	16.6644	16.3295	16.1643	16.5529	16.347	15.918	14.8781	16.4242	16.6644	16.3295	16.1643	16.5529	Bet1l	0.535975	0.200783	0.697274	4	4	1	0
Q8R2U0	SEH1_MOUSE	Seh1l	Nucleoporin SEH1	64001.3	53064.2	60176.7	67521.2	42449.6	77967.5	90177.4	203583	15.9658	15.6955	15.8769	16.0431	15.3735	16.2506	16.4605	17.6353	15.9658	15.6955	15.8769	16.0431	15.3735	16.2506	16.4605	17.6353	Seh1l	0.534637	0.30021	0.522576	4	4	1	0
P04919	B3AT_MOUSE	Slc4a1	Band 3 anion transport protein	16607.7	25072.7	20893.7	23844.6	27085.3	33935	30362.4	32644.7	14.0196	14.6138	14.3508	14.5414	14.7252	15.0505	14.89	14.9946	14.0196	14.6138	14.3508	14.5414	14.7252	15.0505	14.89	14.9946	Slc4a1	0.53368	0.0122259	1.91272	4	4	1	0
P11928	OAS1A_MOUSE	Oas1a	2'-5'-oligoadenylate synthase 1A	96576.3	139700	191299	142143	119759	178295	233713	322058	16.5594	17.092	17.5455	17.117	16.8698	17.4439	17.8344	18.297	16.5594	17.092	17.5455	17.117	16.8698	17.4439	17.8344	18.297	Oas1a	0.532803	0.193238	0.713908	4	4	1	0
P61967	AP1S1_MOUSE	Ap1s1	AP-1 complex subunit sigma-1A	13617.7	16013.5	18378.4	13347.8	19659.4	18763.2	22830.4	27825.1	13.7332	13.967	14.1657	13.7043	14.2629	14.1956	14.4787	14.7641	13.7332	13.967	14.1657	13.7043	14.2629	14.1956	14.4787	14.7641	Ap1s1	0.532771	0.0191803	1.71715	4	4	1	0
Q9D1Q4	DPM3_MOUSE	Dpm3	Dolichol-phosphate mannosyltransferase subunit 3	74397.8	50140.8	28708.5	56822.9	84157.6	91245.9	67344	51537.5	16.183	15.6137	14.8092	15.7942	16.3608	16.4775	16.0393	15.6533	16.183	15.6137	14.8092	15.7942	16.3608	16.4775	16.0393	15.6533	Dpm3	0.532707	0.171492	0.765755	4	4	1	0
Q04750	TOP1_MOUSE	Top1	DNA topoisomerase 1	705525	440816	300406	467741	874804	781682	934746	298998	19.4283	18.7498	18.1966	18.8354	19.7386	19.5762	19.8342	18.1898	19.4283	18.7498	18.1966	18.8354	19.7386	19.5762	19.8342	18.1898	Top1	0.532189	0.291735	0.535012	4	4	1	0
F6WL90	F6WL90_MOUSE	Sp100	Nuclear antigen Sp100 (Fragment)	68729.6	56097.4	99049.4	69693	81389.4	95786.3	127155	117396	16.0686	15.7756	16.5959	16.0887	16.3126	16.5475	16.9562	16.841	16.0686	15.7756	16.5959	16.0887	16.3126	16.5475	16.9562	16.841	Sp100	0.532115	0.0550663	1.25911	4	4	1	0
Q9JL15	LEG8_MOUSE	Lgals8	Galectin-8	43766.4	47555	37125.4	39036.6	64568.8	72966.5	49027.2	57077	15.4175	15.5373	15.1801	15.2525	15.9785	16.1549	15.5813	15.8006	15.4175	15.5373	15.1801	15.2525	15.9785	16.1549	15.5813	15.8006	Lgals8	0.531977	0.0110641	1.95608	4	4	1	0
P29595;cRAP-Q15843	NEDD8_MOUSE;cRAP-NEDD8_HUMAN	Nedd8;cRAP-NEDD8	NEDD8	486618	464232	266687	278221	417073	582433	564624	532434	18.8924	18.8245	18.0248	18.0859	18.6699	19.1517	19.1069	19.0222	18.8924	18.8245	18.0248	18.0859	18.6699	19.1517	19.1069	19.0222	Nedd8;cRAP-NEDD8	0.530818	0.0844016	1.07365	4	4	1	0
Q61147	CERU_MOUSE	Cp	Ceruloplasmin	6305.37				6554.95	6889.37	13057		12.6224				12.6784	12.7502	13.6725		12.6224	12.1943	12.2707	12.2163	12.6784	12.7502	13.6725	12.3248	Cp	0.530537	0.131977	0.879502	3	1	1	0
Q8K1A5	TM41B_MOUSE	Tmem41b	Transmembrane protein 41B	29761.1	46642.1	41320.4	56005.6	53880.6	68263.9	65020.3	58330	14.8611	15.5093	15.3346	15.7733	15.7175	16.0588	15.9886	15.832	14.8611	15.5093	15.3346	15.7733	15.7175	16.0588	15.9886	15.832	Tmem41b	0.529633	0.0428566	1.36798	4	4	1	0
A0A2I3BQS7	A0A2I3BQS7_MOUSE	Sdr39u1	Short chain dehydrogenase/reductase family 39U, member 1 (Fragment)	17094.7	10820.9	23000.1	12421.4	24343.2	13229.7	22424.9	31720.6	14.0613	13.4015	14.4894	13.6005	14.5712	13.6915	14.4528	14.9531	14.0613	13.4015	14.4894	13.6005	14.5712	13.6915	14.4528	14.9531	Sdr39u1	0.528996	0.19144	0.717967	4	4	1	0
Q8BT07	CEP55_MOUSE	Cep55	Centrosomal protein of 55 kDa	91345.8	74261.7	80735.1	82052.8	202128	140078	91815.1	74414.6	16.4791	16.1803	16.3009	16.3243	17.6249	17.0959	16.4864	16.1833	16.4791	16.1803	16.3009	16.3243	17.6249	17.0959	16.4864	16.1833	Cep55	0.526492	0.158456	0.800091	4	4	1	0
O08715	AKAP1_MOUSE	Akap1	A-kinase anchor protein 1, mitochondrial	60416.2	94898	101571	121811	98561.2	141161	135290	161656	15.8826	16.5341	16.6321	16.8943	16.5887	17.107	17.0457	17.3026	15.8826	16.5341	16.6321	16.8943	16.5887	17.107	17.0457	17.3026	Akap1	0.525206	0.0925206	1.03376	4	4	1	0
A0A087WQ32;A0A087WS03;G3X9F1	A0A087WQ32_MOUSE;A0A087WS03_MOUSE;G3X9F1_MOUSE	Pign	GPI ethanolamine phosphate transferase 1	39409	34146.8	46117.1	30287.9	36707.9	63553	60277.7	57272.6	15.2662	15.0595	15.493	14.8865	15.1638	15.9557	15.8793	15.8056	15.2662	15.0595	15.493	14.8865	15.1638	15.9557	15.8793	15.8056	Pign	0.5248	0.0576368	1.2393	4	4	1	0
Q80U58	PUM2_MOUSE	Pum2	Pumilio homolog 2	54705.8	66667.3	62716.5	63789.3	82978.5	88795.3	79740.1	106146	15.7394	16.0247	15.9366	15.961	16.3404	16.4382	16.283	16.6957	15.7394	16.0247	15.9366	15.961	16.3404	16.4382	16.283	16.6957	Pum2	0.523918	0.00312661	2.50493	4	4	1	0
Q9Z117	Q9Z117_MOUSE	Zfp53	KRAB-containing zinc-finger protein KRAZ1	12250.6			15597	15722.5	16596.4	14127.6		13.5806			13.929	13.9405	14.0186	13.7862		13.5806	12.1943	12.2707	13.929	13.9405	14.0186	13.7862	12.3248	Zfp53	0.523893	0.415414	0.381519	3	2	1	0
P47753	CAZA1_MOUSE	Capza1	F-actin-capping protein subunit alpha-1	576758	663282	602005	784420	687217	1041240	1054890	1012140	19.1376	19.3393	19.1994	19.5813	19.3904	19.9899	20.0087	19.949	19.1376	19.3393	19.1994	19.5813	19.3904	19.9899	20.0087	19.949	Capza1	0.520091	0.0266868	1.5737	4	4	1	0
Q6NVG1	LPCT4_MOUSE	Lpcat4	Lysophospholipid acyltransferase LPCAT4	3537.51	4805.98	5194.58	4093.83	7326.37	3997.85	6704.06	7784.74	11.7885	12.2306	12.3428	11.9992	12.8389	11.965	12.7108	12.9264	11.7885	12.2306	12.3428	11.9992	12.8389	11.965	12.7108	12.9264	Lpcat4	0.519996	0.0845614	1.07283	4	4	1	0
Q99LU0	CH1B1_MOUSE	Chmp1b1	Charged multivesicular body protein 1B1	606214	205194	98416.5	166494	528127	364212	333441	133908	19.2095	17.6466	16.5866	17.3451	19.0105	18.4744	18.3471	17.0309	19.2095	17.6466	16.5866	17.3451	19.0105	18.4744	18.3471	17.0309	Chmp1b1	0.51877	0.482541	0.316465	4	4	1	0
Q8VC52	RBPS2_MOUSE	Rbpms2	RNA-binding protein with multiple splicing 2	10195.5	11745.3	17840.2	11646	15550.8	11078.1	24302.3	24962.1	13.3156	13.5198	14.1228	13.5075	13.9247	13.4354	14.5688	14.6075	13.3156	13.5198	14.1228	13.5075	13.9247	13.4354	14.5688	14.6075	Rbpms2	0.517637	0.168665	0.772974	4	4	1	0
P48972	MYBB_MOUSE	Mybl2	Myb-related protein B	21937.3	14333.1	15854.9	15057.5	18343.7	28390.1	26511.5	22802.4	14.4211	13.8071	13.9526	13.8782	14.163	14.7931	14.6943	14.4769	14.4211	13.8071	13.9526	13.8782	14.163	14.7931	14.6943	14.4769	Mybl2	0.517082	0.0391515	1.40725	4	4	1	0
Q9JMD1	SMBT1_MOUSE	Sfmbt1	Scm-like with four MBT domains protein 1		12619.8	11052.4	12202.1	15928.7	10663.1	14468.8	13665.4		13.6234	13.4321	13.5748	13.9593	13.3803	13.8207	13.7382	12.2035	13.6234	13.4321	13.5748	13.9593	13.3803	13.8207	13.7382	Sfmbt1	0.516185	0.200869	0.697087	4	3	1	0
Q8CF89	TAB1_MOUSE	Tab1	TGF-beta-activated kinase 1 and MAP3K7-binding protein 1	71843.7	63525.9	59829.5	69359.1	92208.2	100140	86594.1	99010.3	16.1326	15.9551	15.8686	16.0818	16.4926	16.6117	16.402	16.5953	16.1326	15.9551	15.8686	16.0818	16.4926	16.6117	16.402	16.5953	Tab1	0.515885	0.000550627	3.25914	4	4	1	0
Q9DBL9	ABHD5_MOUSE	Abhd5	1-acylglycerol-3-phosphate O-acyltransferase ABHD5	14688.4	12565.9	9215.21	8811.73	14888.3	12182.5	17374.9	19861.5	13.8424	13.6172	13.1698	13.1052	13.8619	13.5725	14.0847	14.2777	13.8424	13.6172	13.1698	13.1052	13.8619	13.5725	14.0847	14.2777	Abhd5	0.515548	0.0693048	1.15924	4	4	1	0
Q9EP72	EMC7_MOUSE	Emc7	Endoplasmic reticulum membrane protein complex subunit 7	64297.1	71492.5	60084.2	71204.7	85651	98074.8	86326.5	112953	15.9725	16.1255	15.8747	16.1197	16.3862	16.5816	16.3975	16.7854	15.9725	16.1255	15.8747	16.1197	16.3862	16.5816	16.3975	16.7854	Emc7	0.514576	0.00369866	2.43196	4	4	1	0
Q64152	BTF3_MOUSE	Btf3	Transcription factor BTF3	629128	634011	735397	561199	719072	950502	913993	1092280	19.263	19.2741	19.4882	19.0982	19.4558	19.8583	19.8018	20.0589	19.263	19.2741	19.4882	19.0982	19.4558	19.8583	19.8018	20.0589	Btf3	0.512846	0.0136686	1.86428	4	4	1	0
Q9CRC6	BORC7_MOUSE	Borcs7	BLOC-1-related complex subunit 7	17248.8	13600.9	16101.7	10280.7	11399.1	27270.3	23114	22375.8	14.0742	13.7314	13.9749	13.3277	13.4766	14.735	14.4965	14.4497	14.0742	13.7314	13.9749	13.3277	13.4766	14.735	14.4965	14.4497	Borcs7	0.512402	0.164786	0.783079	4	4	1	0
Q8R104	SIR3_MOUSE	Sirt3	NAD-dependent protein deacetylase sirtuin-3	11481.9	3651.12			9280.82	6611.08	7569.6	8786.16	13.4871	11.8341			13.18	12.6907	12.886	13.101	13.4871	11.8341	12.2707	12.2163	13.18	12.6907	12.886	13.101	Sirt3	0.51237	0.220863	0.655877	4	2	1	0
Q8K274	KT3K_MOUSE	Fn3krp	Ketosamine-3-kinase	45138.9	38921.9	37158.8	41187.1	42170.1	66355.8	61535	64639	15.4621	15.2483	15.1814	15.3299	15.3639	16.0179	15.9091	15.9801	15.4621	15.2483	15.1814	15.3299	15.3639	16.0179	15.9091	15.9801	Fn3krp	0.512351	0.0207012	1.684	4	4	1	0
P54823	DDX6_MOUSE	Ddx6	Probable ATP-dependent RNA helicase DDX6	253870	265622	81588.3	254308	283406	264571	280194	274743	17.9537	18.019	16.3161	17.9562	18.1125	18.0133	18.0961	18.0677	17.9537	18.019	16.3161	17.9562	18.1125	18.0133	18.0961	18.0677	Ddx6	0.51114	0.265089	0.576608	4	4	1	0
Q08761	PROS_MOUSE	Pros1	Vitamin K-dependent protein S	54897.3	43130.2	63394.9	48718.8	47727.8	70526.4	97967.3	91322.5	15.7444	15.3964	15.9521	15.5722	15.5425	16.1059	16.58	16.4787	15.7444	15.3964	15.9521	15.5722	15.5425	16.1059	16.58	16.4787	Pros1	0.510496	0.100373	0.998385	4	4	1	0
Q91YI6	GLD2_MOUSE	Tent2	Poly(A) RNA polymerase GLD2	28375.9	24477.3	28556	18547.8	36949	37880.8	33993.8	31786.1	14.7924	14.5792	14.8015	14.179	15.1732	15.2092	15.053	14.9561	14.7924	14.5792	14.8015	14.179	15.1732	15.2092	15.053	14.9561	Tent2	0.509879	0.0174147	1.75908	4	4	1	0
O35245	PKD2_MOUSE	Pkd2	Polycystin-2		8983.95	6348.26	8189.91	10416	8835.46	9594.9	10248.7		13.1331	12.6321	12.9996	13.3465	13.1091	13.2281	13.3232	12.2035	13.1331	12.6321	12.9996	13.3465	13.1091	13.2281	13.3232	Pkd2	0.509593	0.0557769	1.25355	4	3	1	0
O09053	WRN_MOUSE	Wrn	Bifunctional 3'-5' exonuclease/ATP-dependent helicase WRN		16334.9	13899.4	8271.61	9834.56	16040.6	16926.6	13586.9		13.9957	13.7627	13.014	13.2636	13.9694	14.047	13.7299	12.2035	13.9957	13.7627	13.014	13.2636	13.9694	14.047	13.7299	Wrn	0.508534	0.293568	0.532291	4	3	1	0
Q3U2U7	MET17_MOUSE	Mettl17	Ribosome assembly protein METTL17, mitochondrial	18816.5	20016.5		11663.4	20875.9	18359.6	15561.3	14861.6	14.1997	14.2889		13.5097	14.3496	14.1642	13.9257	13.8593	14.1997	14.2889	12.2707	13.5097	14.3496	14.1642	13.9257	13.8593	Mettl17	0.507431	0.330526	0.480794	4	3	1	0
Q9WU62	INCE_MOUSE	Incenp	Inner centromere protein	139088	153505	140276	144227	179975	231473	210174	201252	17.0856	17.2279	17.0979	17.138	17.4574	17.8205	17.6812	17.6186	17.0856	17.2279	17.0979	17.138	17.4574	17.8205	17.6812	17.6186	Incenp	0.507084	0.000815369	3.08865	4	4	1	0
A2AIL4	NDUF6_MOUSE	Ndufaf6	NADH dehydrogenase (ubiquinone) complex I, assembly factor 6	34958.9	32594.3	42581.9		23147.5	30969.7	43166.3	30405.2	15.0934	14.9923	15.378		14.4986	14.9186	15.3976	14.892	15.0934	14.9923	15.378	12.2163	14.4986	14.9186	15.3976	14.892	Ndufaf6	0.506704	0.530601	0.275232	4	3	1	0
Q91ZU1	ASB6_MOUSE	Asb6	Ankyrin repeat and SOCS box protein 6	17820.5	15250.6	17467.6	15721.7	25240.7	20260.8	23625	25107	14.1213	13.8966	14.0924	13.9405	14.6235	14.3064	14.528	14.6158	14.1213	13.8966	14.0924	13.9405	14.6235	14.3064	14.528	14.6158	Asb6	0.505751	0.00155063	2.80949	4	4	1	0
Q3UA16	SPC25_MOUSE	Spc25	Kinetochore protein Spc25	58244	56175.7	47859	60698.5	94645.2	85512.3	64583.1	73905.8	15.8298	15.7777	15.5465	15.8894	16.5302	16.3838	15.9789	16.1734	15.8298	15.7777	15.5465	15.8894	16.5302	16.3838	15.9789	16.1734	Spc25	0.50575	0.0119317	1.9233	4	4	1	0
Q923A2	SPDLY_MOUSE	Spdl1	Protein Spindly	34536.8	34562	34620.8	28704.2	40091.4	49134.9	51387.7	47603.6	15.0758	15.0769	15.0794	14.809	15.291	15.5845	15.6491	15.5388	15.0758	15.0769	15.0794	14.809	15.291	15.5845	15.6491	15.5388	Spdl1	0.505578	0.00270219	2.56828	4	4	1	0
P70270	RAD54_MOUSE	Rad54l	DNA repair and recombination protein RAD54-like	21963.1	32546.8	33709.2	29640.9	43754.3	42693.3	32520	47658.9	14.4228	14.9902	15.0409	14.8553	15.4171	15.3817	14.989	15.5405	14.4228	14.9902	15.0409	14.8553	15.4171	15.3817	14.989	15.5405	Rad54l	0.504795	0.033745	1.47179	4	4	1	0
Q9D8X5	CNOT8_MOUSE	Cnot8	CCR4-NOT transcription complex subunit 8		16875.2	23799	28407.9	17956.6	16249.4	20579.8	36321		14.0426	14.5386	14.794	14.1322	13.9881	14.3289	15.1485	12.2035	14.0426	14.5386	14.794	14.1322	13.9881	14.3289	15.1485	Cnot8	0.504756	0.460178	0.337075	4	3	1	0
Q8K297	GT251_MOUSE	Colgalt1	Procollagen galactosyltransferase 1	452050	438259	485988	139251	462356	513287	524680	436336	18.7861	18.7414	18.8906	17.0873	18.8186	18.9694	19.0011	18.7351	18.7861	18.7414	18.8906	17.0873	18.8186	18.9694	19.0011	18.7351	Colgalt1	0.504693	0.290411	0.536986	4	4	1	0
Q61189	ICLN_MOUSE	Clns1a	Methylosome subunit pICln	76099	67241.2	67223.9	66526.2	93935.2	108054	64167.6	142140	16.2156	16.0371	16.0367	16.0216	16.5194	16.7214	15.9696	17.117	16.2156	16.0371	16.0367	16.0216	16.5194	16.7214	15.9696	17.117	Clns1a	0.504078	0.0836347	1.07761	4	4	1	0
E9Q6U4;Q3UWL8	E9Q6U4_MOUSE;Q3UWL8_MOUSE	Pfdn4	Prefoldin subunit 4	32504.5	15801	19854.1	18818.9	27284.8	30881.1	40848.7	22502.6	14.9884	13.9477	14.2771	14.1999	14.7358	14.9144	15.318	14.4578	14.9884	13.9477	14.2771	14.1999	14.7358	14.9144	15.318	14.4578	Pfdn4	0.503232	0.129842	0.886585	4	4	1	0
Q9R0Y5	KAD1_MOUSE	Ak1	Adenylate kinase isoenzyme 1	73270.9	30042.3	49576.2	24546.4	55972.1	36192.2	142279	37489	16.161	14.8747	15.5974	14.5832	15.7724	15.1434	17.1184	15.1942	16.161	14.8747	15.5974	14.5832	15.7724	15.1434	17.1184	15.1942	Ak1	0.503028	0.420427	0.37631	4	4	1	0
Q9JHW4	SELB_MOUSE	Eefsec	Selenocysteine-specific elongation factor	99767.6	89744.5	93600.8	97040.7	96532.5	121699	176545	157476	16.6063	16.4535	16.5142	16.5663	16.5587	16.893	17.4297	17.2648	16.6063	16.4535	16.5142	16.5663	16.5587	16.893	17.4297	17.2648	Eefsec	0.501445	0.0442431	1.35415	4	4	1	0
Q8R3F9	STPAP_MOUSE	Tut1	Speckle targeted PIP5K1A-regulated poly(A) polymerase	23626.7	19637.9	21777.6	14348.9	26713.1	25449.2	28363.2	30145.4	14.5281	14.2614	14.4106	13.8087	14.7053	14.6353	14.7917	14.8797	14.5281	14.2614	14.4106	13.8087	14.7053	14.6353	14.7917	14.8797	Tut1	0.50082	0.0236297	1.62654	4	4	1	0
Q920D3	MED28_MOUSE	Med28	Mediator of RNA polymerase II transcription subunit 28	80337.5	75955.7	99711.3	69062.2	68095.3	128068	136773	141154	16.2938	16.2129	16.6055	16.0756	16.0553	16.9666	17.0614	17.1069	16.2938	16.2129	16.6055	16.0756	16.0553	16.9666	17.0614	17.1069	Med28	0.500604	0.116682	0.932995	4	4	1	0
A3KGI3	A3KGI3_MOUSE	Knl1	Kinetochore scaffold 1	36802.3	33858.2	39704.4	29104.3	38762.4	54340	58257.4	46819.5	15.1675	15.0472	15.277	14.8289	15.2424	15.7297	15.8302	15.5148	15.1675	15.0472	15.277	14.8289	15.2424	15.7297	15.8302	15.5148	Knl1	0.499098	0.0214882	1.6678	4	4	1	0
A0AAG1FCE8	A0AAG1FCE8_MOUSE	LOC102638047	Sp110 nuclear body protein								21580.8								14.3975	12.2035	12.1943	12.2707	12.2163	12.0989	12.1714	12.2107	14.3975	LOC102638047	0.498385	0.407764	0.389592	1	0	0	0
E9Q6P5	TTC7B_MOUSE	Ttc7b	Tetratricopeptide repeat protein 7B	5595.86	8888.44	10434.1	4868.27		9362.82	15547.1	15755.1	12.4501	13.1177	13.349	12.2492		13.1927	13.9244	13.9435	12.4501	13.1177	13.349	12.2492	12.0989	13.1927	13.9244	13.9435	Ttc7b	0.498364	0.363652	0.439314	3	4	1	0
Q9CPV2	APC16_MOUSE	Anapc16	Anaphase-promoting complex subunit 16				6614.3	7725.83	6092.62	7119.48	8554.38				12.6914	12.9155	12.5728	12.7976	13.0624	12.2035	12.1943	12.2707	12.6914	12.9155	12.5728	12.7976	13.0624	Anapc16	0.49709	0.019496	1.71005	4	1	1	0
Q8CIS0	CAR11_MOUSE	Card11	Caspase recruitment domain-containing protein 11	28104.7	34634.5	25598.4	36046.5	38221.2	43972.7	39669.8	53221.8	14.7785	15.0799	14.6438	15.1376	15.2221	15.4243	15.2758	15.6997	14.7785	15.0799	14.6438	15.1376	15.2221	15.4243	15.2758	15.6997	Card11	0.495526	0.0210641	1.67646	4	4	1	0
Q8K4Q6	NEIL1_MOUSE	Neil1	Endonuclease 8-like 1	10258.9	6306.54	7988.33	7975.11	10304.1	10677.6	11086.9	13326.8	13.3246	12.6226	12.9637	12.9613	13.3309	13.3823	13.4366	13.702	13.3246	12.6226	12.9637	12.9613	13.3309	13.3823	13.4366	13.702	Neil1	0.494913	0.0242514	1.61526	4	4	1	0
Q9D4C5	EAF1_MOUSE	Eaf1	ELL-associated factor 1	24874.8	60660.8	70569.4	37007	54911.2	58570.2	68884	70073.4	14.6024	15.8885	16.1068	15.1755	15.7448	15.8379	16.0719	16.0966	14.6024	15.8885	16.1068	15.1755	15.7448	15.8379	16.0719	16.0966	Eaf1	0.494503	0.21243	0.672784	4	4	1	0
Q9CS00	CATIN_MOUSE	Cactin	Splicing factor Cactin	31927.4	28389.8	26741.1	27020.1	43110.1	39126.5	41695.3	36681.4	14.9625	14.7931	14.7068	14.7217	15.3957	15.2559	15.3476	15.1628	14.9625	14.7931	14.7068	14.7217	15.3957	15.2559	15.3476	15.1628	Cactin	0.494461	0.000722762	3.141	4	4	1	0
Q8BQZ4	RLGPB_MOUSE	Ralgapb	Ral GTPase-activating protein subunit beta	50538.2	56150.5	51100.5	65357.5	71974.7	80649.8	80642.2	79744	15.6251	15.777	15.641	15.9961	16.1352	16.2994	16.2992	16.2831	15.6251	15.777	15.641	15.9961	16.1352	16.2994	16.2992	16.2831	Ralgapb	0.494427	0.00196578	2.70647	4	4	1	0
Q9CR41	HYPK_MOUSE	Hypk	Huntingtin-interacting protein K	859199	630417	516201	807521	1027700	968883	1066110	837425	19.7126	19.2659	18.9776	19.6231	19.971	19.886	20.0239	19.6756	19.7126	19.2659	18.9776	19.6231	19.971	19.886	20.0239	19.6756	Hypk	0.494296	0.0375144	1.4258	4	4	1	0
Q99J19	SIM11_MOUSE	Smim11	Small integral membrane protein 11	17506.9	17415.2	14301.9	9162.42	22774.2	10636.5	19090.7	33624.9	14.0956	14.0881	13.8039	13.1615	14.4751	13.3767	14.2206	15.0372	14.0956	14.0881	13.8039	13.1615	14.4751	13.3767	14.2206	15.0372	Smim11	0.490136	0.276051	0.55901	4	4	1	0
Q8R164	BPHL_MOUSE	Bphl	Valacyclovir hydrolase	674181	506434	902588	377237	517234	622846	1213820	1156150	19.3628	18.95	19.7837	18.5251	18.9805	19.2485	20.2111	20.1409	19.3628	18.95	19.7837	18.5251	18.9805	19.2485	20.2111	20.1409	Bphl	0.489846	0.279965	0.552896	4	4	1	0
Q8K2Y7	RM47_MOUSE	Mrpl47	Large ribosomal subunit protein uL29m	68206.2	56159.4	69518.8	61585.4	89365.5	96247.7	83116	89140.6	16.0576	15.7772	16.0851	15.9103	16.4474	16.5545	16.3428	16.4438	16.0576	15.7772	16.0851	15.9103	16.4474	16.5545	16.3428	16.4438	Mrpl47	0.489564	0.00108066	2.96631	4	4	1	0
Q3TZM9	ALG11_MOUSE	Alg11	GDP-Man:Man(3)GlcNAc(2)-PP-Dol alpha-1,2-mannosyltransferase	15571.3	14216.5	15798.4	10259.5	19896.9	21057	16255.3	20466.8	13.9266	13.7953	13.9475	13.3247	14.2803	14.362	13.9886	14.321	13.9266	13.7953	13.9475	13.3247	14.2803	14.362	13.9886	14.321	Alg11	0.489461	0.0269629	1.56923	4	4	1	0
Q673H1	TUSC1_MOUSE	Tusc1	Tumor suppressor candidate gene 1 protein homolog	65913.3	57957.3	61619.5	67413.7	67845.1	66364.6	125289	109022	16.0083	15.8227	15.9111	16.0408	16.05	16.0181	16.9349	16.7343	16.0083	15.8227	15.9111	16.0408	16.05	16.0181	16.9349	16.7343	Tusc1	0.488601	0.0878733	1.05614	4	4	1	0
Q8R0B4	Q8R0B4_MOUSE	Tardbp	TAR DNA binding protein	17054.9	9118.26	16994.7	11096.4		12562	52306.8	39424.7	14.0579	13.1545	14.0528	13.4378		13.6168	15.6747	15.2668	14.0579	13.1545	14.0528	13.4378	12.0989	13.6168	15.6747	15.2668	Tardbp	0.488542	0.586534	0.231707	3	4	1	0
P83093	STIM2_MOUSE	Stim2	Stromal interaction molecule 2	45328.1	37218.6	47601	37017.7	44060.3	54148.4	79438.4	60702.2	15.4681	15.1837	15.5387	15.1759	15.4272	15.7246	16.2775	15.8895	15.4681	15.1837	15.5387	15.1759	15.4272	15.7246	16.2775	15.8895	Stim2	0.488087	0.0512125	1.29062	4	4	1	0
Q8C0I4	EPC2_MOUSE	Epc2	Enhancer of polycomb homolog 2	6526.62		8950.85		9783.95	8732.46	11494		12.6721		13.1278		13.2562	13.0922	13.4886		12.6721	12.1943	13.1278	12.2163	13.2562	13.0922	13.4886	12.3248	Epc2	0.487806	0.195903	0.707959	3	2	1	0
Q8C3S2	TNG6_MOUSE	Tango6	Transport and Golgi organization protein 6 homolog	16684	15387.5	29033.2		15571.5	20136.7	22572.6	19357.6	14.0262	13.9095	14.8254		13.9266	14.2975	14.4623	14.2406	14.0262	13.9095	14.8254	12.2163	13.9266	14.2975	14.4623	14.2406	Tango6	0.48742	0.417412	0.379435	4	3	1	0
Q9CPX8	QCR10_MOUSE	Uqcr11	Cytochrome b-c1 complex subunit 10	5089.99	4169.94	4703.94	4172.03	7806.22	5349.53	5951.84	6460.27	12.3134	12.0258	12.1997	12.0265	12.9304	12.3852	12.5391	12.6574	12.3134	12.0258	12.1997	12.0265	12.9304	12.3852	12.5391	12.6574	Uqcr11	0.486664	0.0113013	1.94687	4	4	1	0
Q811S7	UBIP1_MOUSE	Ubp1	Upstream-binding protein 1	18991.2	27744.8	30721.8	26204.5	23447.7	38759.2	40921.8	43884.9	14.213	14.7599	14.907	14.6775	14.5172	15.2423	15.3206	15.4214	14.213	14.7599	14.907	14.6775	14.5172	15.2423	15.3206	15.4214	Ubp1	0.485988	0.105029	0.97869	4	4	1	0
Q9D2X8	CH076_MOUSE		Uncharacterized protein C8orf76 homolog	24656.8		31659	22034	19436.3	26080.3	27109	22502	14.5897		14.9503	14.4274	14.2465	14.6707	14.7265	14.4578	14.5897	12.1943	14.9503	14.4274	14.2465	14.6707	14.7265	14.4578		0.484897	0.473723	0.324476	4	3	1	0
Q3V4D5	Q3V4D5_MOUSE	Naa10	N-terminal amino-acid N(alpha)-acetyltransferase NatA	174531	153387	127924	98501.6	215518	197495	200752	151332	17.4131	17.2268	16.9649	16.5879	17.7174	17.5915	17.6151	17.2074	17.4131	17.2268	16.9649	16.5879	17.7174	17.5915	17.6151	17.2074	Naa10	0.484648	0.0613389	1.21226	4	4	1	0
Q9D020	5NT3A_MOUSE	Nt5c3a	Cytosolic 5'-nucleotidase 3A	55730.5	66324.6	79020.8	57501.2	76464.7	82017.1	92400	110774	15.7662	16.0173	16.2699	15.8113	16.2225	16.3236	16.4956	16.7573	15.7662	16.0173	16.2699	15.8113	16.2225	16.3236	16.4956	16.7573	Nt5c3a	0.483581	0.025707	1.58995	4	4	1	0
Q64331	MYO6_MOUSE	Myo6	Unconventional myosin-VI	20659.6	12906.3	19211.7	18393.8	15056	23912.7	35466.8	28044.9	14.3345	13.6558	14.2297	14.1669	13.8781	14.5455	15.1142	14.7755	14.3345	13.6558	14.2297	14.1669	13.8781	14.5455	15.1142	14.7755	Myo6	0.481558	0.16137	0.792178	4	4	1	0
A0A571BF69	A0A571BF69_MOUSE	Mgam	Maltase-glucoamylase	12044.2	11302.7	9997.54	9583.69	11715.4	18394.2	13954.6	16462.8	13.5561	13.4644	13.2874	13.2264	13.5161	14.167	13.7685	14.0069	13.5561	13.4644	13.2874	13.2264	13.5161	14.167	13.7685	14.0069	Mgam	0.481076	0.0246181	1.60874	4	4	1	0
P51791	CLCN3_MOUSE	Clcn3	H(+)/Cl(-) exchange transporter 3	12605.3	21732.6	17096.7	27950	24029.3	32732.9	32855.8	19222.6	13.6217	14.4076	14.0614	14.7706	14.5525	14.9985	15.0039	14.2305	13.6217	14.4076	14.0614	14.7706	14.5525	14.9985	15.0039	14.2305	Clcn3	0.481008	0.170401	0.768528	4	4	1	0
O08796	EF2K_MOUSE	Eef2k	Eukaryotic elongation factor 2 kinase	41785.7	34417.6	60977.7	40963.3	54721.7	56928.5	57768.2	75749.4	15.3507	15.0709	15.896	15.322	15.7398	15.7969	15.818	16.2089	15.3507	15.0709	15.896	15.322	15.7398	15.7969	15.818	16.2089	Eef2k	0.481001	0.0566685	1.24666	4	4	1	0
P45591	COF2_MOUSE	Cfl2	Cofilin-2	17564	11471.7	11961.8	9434.68	15280.6	12711.6	25286.2	17553.6	14.1003	13.4858	13.5461	13.2038	13.8994	13.6339	14.6261	14.0995	14.1003	13.4858	13.5461	13.2038	13.8994	13.6339	14.6261	14.0995	Cfl2	0.480696	0.138683	0.857977	4	4	1	0
Q8VCF1	CANT1_MOUSE	Cant1	Soluble calcium-activated nucleotidase 1	23994.9	20672.4	19594.9	22573	23090.7	29610.8	37093.4	32688	14.5504	14.3354	14.2582	14.4623	14.495	14.8538	15.1789	14.9965	14.5504	14.3354	14.2582	14.4623	14.495	14.8538	15.1789	14.9965	Cant1	0.479462	0.0234119	1.63056	4	4	1	0
Q6IRU2	TPM4_MOUSE	Tpm4	Tropomyosin alpha-4 chain	756113	700220	622634	669936	940614	900129	995876	989671	19.5282	19.4174	19.248	19.3537	19.8432	19.7798	19.9256	19.9166	19.5282	19.4174	19.248	19.3537	19.8432	19.7798	19.9256	19.9166	Tpm4	0.479458	0.000404752	3.39281	4	4	1	0
Q3V460	Q3V460_MOUSE	Smim26	Gene model 561, (NCBI)	7947.5	4341.23	3946.29	9203.52	8915.06	6683.45	11853	6700.81	12.9563	12.0839	11.9463	13.168	13.122	12.7064	13.533	12.7101	12.9563	12.0839	11.9463	13.168	13.122	12.7064	13.533	12.7101	Smim26	0.479266	0.236803	0.625612	4	4	1	0
Q9JHK5	PLEK_MOUSE	Plek	Pleckstrin	194178	184680	191368	186372	204370	221057	319473	334000	17.567	17.4947	17.546	17.5078	17.6408	17.7541	18.2853	18.3495	17.567	17.4947	17.546	17.5078	17.6408	17.7541	18.2853	18.3495	Plek	0.47855	0.0388671	1.41042	4	4	1	0
G3UW50	G3UW50_MOUSE	Zbtb25	Zinc finger and BTB domain containing 25	4828.46	7367.4	10263.3	4880.36		7510.91	19301.4	10541.2	12.2373	12.8469	13.3252	12.2528		12.8748	14.2364	13.3638	12.2373	12.8469	13.3252	12.2528	12.0989	12.8748	14.2364	13.3638	Zbtb25	0.477897	0.392384	0.406289	3	4	1	0
Q9D0M0	EXOS7_MOUSE	Exosc7	Exosome complex exonuclease RRP42	82203.5	70892.6	76146.5	73420.5	94325.7	132492	109219	89732.8	16.3269	16.1133	16.2165	16.1639	16.5254	17.0155	16.7369	16.4533	16.3269	16.1133	16.2165	16.1639	16.5254	17.0155	16.7369	16.4533	Exosc7	0.477619	0.0119469	1.92275	4	4	1	0
P45700	MA1A1_MOUSE	Man1a1	Mannosyl-oligosaccharide 1,2-alpha-mannosidase IA	118762	91123.1	34952.6	36784.8	96519.6	110035	94598.6	51904.8	16.8577	16.4755	15.0931	15.1668	16.5585	16.7476	16.5295	15.6636	16.8577	16.4755	15.0931	15.1668	16.5585	16.7476	16.5295	15.6636	Man1a1	0.476518	0.387488	0.411741	4	4	1	0
Q8VI94	OASL1_MOUSE	Oasl1	2'-5'-oligoadenylate synthase-like protein 1			9086.46				11971.3	14771.3			13.1495				13.5473	13.8505	12.2035	12.1943	13.1495	12.2163	12.0989	12.1714	13.5473	13.8505	Oasl1	0.476098	0.389579	0.409405	2	1	1	0
Q8BMD5	CDAC1_MOUSE	Cdadc1	Cytidine and dCMP deaminase domain-containing protein 1	7960.6	7451.15	5646.9		12923.2	12813.3	7627.59	4722.17	12.9587	12.8632	12.4632		13.6577	13.6454	12.897	12.2052	12.9587	12.8632	12.4632	12.2163	13.6577	13.6454	12.897	12.2052	Cdadc1	0.475953	0.266481	0.574334	4	3	1	0
A0A087WPI4	A0A087WPI4_MOUSE	Ccnyl1	Cyclin Y-like 1 (Fragment)		4506.41		13721.9		11287.1	8820.48	12337.6		12.1378		13.7442		13.4624	13.1066	13.5908	12.2035	12.1378	12.2707	13.7442	12.0989	13.4624	13.1066	13.5908	Ccnyl1	0.475624	0.389579	0.409404	3	2	1	0
Q8BKX1	BAIP2_MOUSE	Baiap2	BAR/IMD domain-containing adapter protein 2	12046.2	15572	14675.8	13469.2	12373.2	14871.3	30989.4	24185.5	13.5563	13.9267	13.8412	13.7174	13.5949	13.8602	14.9195	14.5619	13.5563	13.9267	13.8412	13.7174	13.5949	13.8602	14.9195	14.5619	Baiap2	0.473758	0.185241	0.732262	4	4	1	0
F6VSK8	F6VSK8_MOUSE	Itga6	Integrin alpha 6 (Fragment)	23445.4	26475.6	26185	25128.2	26215.7	41328.7	43975	31873.8	14.517	14.6924	14.6765	14.617	14.6781	15.3349	15.4244	14.9601	14.517	14.6924	14.6765	14.617	14.6781	15.3349	15.4244	14.9601	Itga6	0.473653	0.0368861	1.43314	4	4	1	0
Q9D8C3	ALG13_MOUSE	Alg13	UDP-N-acetylglucosamine transferase subunit ALG13	11507.7	4904.48	3436.25	7733.62	9984.71	14001.6	7770.49		13.4903	12.2599	11.7466	12.9169	13.2855	13.7733	12.9238		13.4903	12.2599	11.7466	12.9169	13.2855	13.7733	12.9238	12.3248	Alg13	0.473421	0.3692	0.432738	3	4	1	0
Q64310	SURF4_MOUSE	Surf4	Surfeit locus protein 4	115890	81419.3	129188	64540.9	137642	116604	133132	136572	16.8224	16.3131	16.9791	15.9779	17.0706	16.8313	17.0225	17.0593	16.8224	16.3131	16.9791	15.9779	17.0706	16.8313	17.0225	17.0593	Surf4	0.472775	0.0935159	1.02911	4	4	1	0
Q5SFM8	RBM27_MOUSE	Rbm27	RNA-binding protein 27	85957.9	91635.4	64139	93063	107450	113943	118625	119773	16.3913	16.4836	15.9689	16.5059	16.7133	16.798	16.856	16.8699	16.3913	16.4836	15.9689	16.5059	16.7133	16.798	16.856	16.8699	Rbm27	0.471864	0.0110719	1.95578	4	4	1	0
M0QWZ1	M0QWZ1_MOUSE	Fam193a	Family with sequence homology 193, member A	28501.8	29388.5	50192.3	29987.9	28183.8	40898.4	68175.6	59311.6	14.7988	14.843	15.6152	14.8721	14.7826	15.3198	16.057	15.856	14.7988	14.843	15.6152	14.8721	14.7826	15.3198	16.057	15.856	Fam193a	0.471582	0.222294	0.653073	4	4	1	0
Q9WUD8	FAIM1_MOUSE	Faim	Fas apoptotic inhibitory molecule 1	220202	203558	218921	196734	215515	291188	339970	333992	17.7485	17.6351	17.7401	17.5859	17.7174	18.1516	18.375	18.3495	17.7485	17.6351	17.7401	17.5859	17.7174	18.1516	18.375	18.3495	Faim	0.471009	0.0241467	1.61714	4	4	1	0
Q9CQH8	RPP14_MOUSE	Rpp14	Ribonuclease P protein subunit p14	9207.24	14197.2	18022.6	14212.1	16123.2	18180.4	25146.4	16732.4	13.1686	13.7933	14.1375	13.7948	13.9769	14.1501	14.6181	14.0304	13.1686	13.7933	14.1375	13.7948	13.9769	14.1501	14.6181	14.0304	Rpp14	0.470286	0.10804	0.966415	4	4	1	0
P06345	HB2S_MOUSE	H2-Ab1	H-2 class II histocompatibility antigen, A-S beta chain					17041.1								14.0567				12.2035	12.1943	12.2707	12.2163	14.0567	12.1714	12.2107	12.3248	H2-Ab1	0.469683	0.343465	0.464117	1	0	0	0
Q8R5H1	UBP15_MOUSE	Usp15	Ubiquitin carboxyl-terminal hydrolase 15	119096	111747	100330	112903	143130	115550	219045	152462	16.8618	16.7699	16.6144	16.7847	17.127	16.8182	17.7409	17.2181	16.8618	16.7699	16.6144	16.7847	17.127	16.8182	17.7409	17.2181	Usp15	0.468331	0.056471	1.24817	4	4	1	0
Q9D174	S18L2_MOUSE	Ss18l2	SS18-like protein 2	5015.84	7330.45	8237.59	5135.89	5609.66	10078.5	13879.3	7247.72	12.2923	12.8397	13.008	12.3264	12.4537	13.299	13.7606	12.8233	12.2923	12.8397	13.008	12.3264	12.4537	13.299	13.7606	12.8233	Ss18l2	0.467571	0.214472	0.668628	4	4	1	0
Q9DCJ9	NPL_MOUSE	Npl	N-acetylneuraminate lyase	77542.9	71181.8	56493.1	79638.6	55090.4	143281	77200.9	148844	16.2427	16.1192	15.7858	16.2812	15.7495	17.1285	16.2363	17.1834	16.2427	16.1192	15.7858	16.2812	15.7495	17.1285	16.2363	17.1834	Npl	0.467219	0.251196	0.599987	4	4	1	0
Q0VEJ0	CEP76_MOUSE	Cep76	Centrosomal protein of 76 kDa	22854.6	20334.2	20286.8	23802.6	21106.4	35445.3	30894.1	35445.3	14.4802	14.3116	14.3083	14.5388	14.3654	15.1133	14.915	15.1133	14.4802	14.3116	14.3083	14.5388	14.3654	15.1133	14.915	15.1133	Cep76	0.467037	0.0460832	1.33646	4	4	1	0
P58158	B3GA3_MOUSE	B3gat3	Galactosylgalactosylxylosylprotein 3-beta-glucuronosyltransferase 3	15743.4		10273.8	19488.5	16259.7	25569.6	13499.4	9608.44	13.9425		13.3267	14.2503	13.989	14.6421	13.7206	13.2301	13.9425	12.1943	13.3267	14.2503	13.989	14.6421	13.7206	13.2301	B3gat3	0.46701	0.421202	0.37551	4	3	1	0
Q02111	KPCT_MOUSE	Prkcq	Protein kinase C theta type	7013.27	3433.79	3718.07	3367.59	3877.34	5768.42	10247.2	4789.58	12.7759	11.7456	11.8603	11.7175	11.9209	12.494	13.3229	12.2257	12.7759	11.7456	11.8603	11.7175	11.9209	12.494	13.3229	12.2257	Prkcq	0.466035	0.280251	0.552454	4	4	1	0
Q0VG62	RBIS_MOUSE	Rbis	Ribosomal biogenesis factor	12136.2	19968.6	28585.8	23912.1	33003.9	30831.3	33670	17517.9	13.567	14.2854	14.803	14.5455	15.0103	14.9121	15.0392	14.0965	13.567	14.2854	14.803	14.5455	15.0103	14.9121	15.0392	14.0965	Rbis	0.464309	0.230722	0.63691	4	4	1	0
Q923K4	GTPB3_MOUSE	Gtpbp3	tRNA modification GTPase GTPBP3, mitochondrial	31575.6	31598	25250.2	34128.1	40224	36852.8	43445.9	48288	14.9465	14.9475	14.624	15.0587	15.2958	15.1695	15.4069	15.5594	14.9465	14.9475	14.624	15.0587	15.2958	15.1695	15.4069	15.5594	Gtpbp3	0.463704	0.0100319	1.99862	4	4	1	0
Q7TQC5	APTX_MOUSE	Aptx	Aprataxin	14893.8	15685.3	18408.2	12124.1	19730.8	23865.5	17825.4	22450.1	13.8624	13.9371	14.1681	13.5656	14.2682	14.5426	14.1216	14.4544	13.8624	13.9371	14.1681	13.5656	14.2682	14.5426	14.1216	14.4544	Aptx	0.46342	0.0249606	1.60274	4	4	1	0
Q2V6D6	Q2V6D6_MOUSE	Gbp8	Guanylate-binding protein 8	13468.5		14896.3	14543.9	15017.3	14233.5	16714.9	13822.5	13.7173		13.8627	13.8281	13.8743	13.797	14.0288	13.7547	13.7173	12.1943	13.8627	13.8281	13.8743	13.797	14.0288	13.7547	Gbp8	0.463123	0.299391	0.523761	4	3	1	0
Q8BLK9	KS6C1_MOUSE	Rps6kc1	Ribosomal protein S6 kinase delta-1	7487.3	8499.13	5310.23	7436.96	7104.67	10171.5	11546.6	10848.7	12.8702	13.0531	12.3746	12.8605	12.7946	13.3122	13.4952	13.4052	12.8702	13.0531	12.3746	12.8605	12.7946	13.3122	13.4952	13.4052	Rps6kc1	0.462207	0.0739266	1.1312	4	4	1	0
E0CXC2	E0CXC2_MOUSE	Gm28043	E3 ubiquitin-protein ligase RNF8	11808.5	11375.9	11476.4		14228.4	15262.2	12272.1	9910.7	13.5275	13.4737	13.4864		13.7965	13.8977	13.5831	13.2748	13.5275	13.4737	13.4864	12.2163	13.7965	13.8977	13.5831	13.2748	Gm28043	0.462025	0.233104	0.63245	4	3	1	0
Q8BH73	QPCTL_MOUSE	Qpctl	Glutaminyl-peptide cyclotransferase-like protein	41223.1	55434.9	65293.1	30720.7	53578.1	56458.6	72260.8	75441.2	15.3312	15.7585	15.9946	14.9069	15.7094	15.7849	16.1409	16.2031	15.3312	15.7585	15.9946	14.9069	15.7094	15.7849	16.1409	16.2031	Qpctl	0.461753	0.138495	0.858567	4	4	1	0
Q6NV72	WDCP_MOUSE	Wdcp	WD repeat and coiled-coil-containing protein	9082.43	9210.8	6964.21	10169.4	15794.5	12276	11669.5	9411.78	13.1489	13.1691	12.7657	13.3119	13.9471	13.5836	13.5105	13.2003	13.1489	13.1691	12.7657	13.3119	13.9471	13.5836	13.5105	13.2003	Wdcp	0.461433	0.0537912	1.26929	4	4	1	0
Q61151	2A5E_MOUSE	Ppp2r5e	Serine/threonine-protein phosphatase 2A 56 kDa regulatory subunit epsilon isoform	76367.5	69341.6	58660.5	72362.9	72821.6	95729.4	119065	97230.3	16.2207	16.0814	15.8401	16.143	16.1521	16.5467	16.8614	16.5691	16.2207	16.0814	15.8401	16.143	16.1521	16.5467	16.8614	16.5691	Ppp2r5e	0.461023	0.0329643	1.48196	4	4	1	0
Q05D44	IF2P_MOUSE	Eif5b	Eukaryotic translation initiation factor 5B	380008	292900	303076	492176	664909	498146	446061	402502	18.5357	18.16	18.2093	18.9088	19.3428	18.9262	18.7669	18.6186	18.5357	18.16	18.2093	18.9088	19.3428	18.9262	18.7669	18.6186	Eif5b	0.460168	0.0959366	1.01802	4	4	1	0
A0A991EKZ2;Q6P5B5	A0A991EKZ2_MOUSE;Q6P5B5_MOUSE	Fxr2	FMR1 autosomal homolog 2	89793.3	63635.7	53586.8	69628	93834.1	90027.6	85892.6	105107	16.4543	15.9575	15.7096	16.0874	16.5178	16.4581	16.3902	16.6815	16.4543	15.9575	15.7096	16.0874	16.5178	16.4581	16.3902	16.6815	Fxr2	0.459703	0.0333723	1.47661	4	4	1	0
O55142	RL35A_MOUSE	Rpl35a	Large ribosomal subunit protein eL33	666992	247899	206365	258037	694830	562335	407022	196716	19.3473	17.9194	17.6548	17.9772	19.4063	19.1011	18.6347	17.5858	19.3473	17.9194	17.6548	17.9772	19.4063	19.1011	18.6347	17.5858	Rpl35a	0.457278	0.438385	0.358144	4	4	1	0
Q6P253	DMKN_MOUSE	Dmkn	Dermokine	29448	39543.8	23355.6	28270	41456.4	46365.9	32489.4	43722.7	14.8459	15.2712	14.5115	14.787	15.3393	15.5008	14.9877	15.4161	14.8459	15.2712	14.5115	14.787	15.3393	15.5008	14.9877	15.4161	Dmkn	0.457087	0.0559114	1.2525	4	4	1	0
A0A087WNU6	A0A087WNU6_MOUSE	Lrrfip1	Leucine rich repeat (in FLII) interacting protein 1 (Fragment)		12838.4			9422.12	9492.67	6539.55	8645.1		13.6482			13.2018	13.2126	12.675	13.0777	12.2035	13.6482	12.2707	12.2163	13.2018	13.2126	12.675	13.0777	Lrrfip1	0.457082	0.27037	0.568041	4	1	1	0
Q9CQW0	EMC6_MOUSE	Emc6	ER membrane protein complex subunit 6	11206.6				16058.6	8405.37	6311.03		13.4521				13.9711	13.0371	12.6237		13.4521	12.1943	12.2707	12.2163	13.9711	13.0371	12.6237	12.3248	Emc6	0.455801	0.371196	0.430397	3	1	1	0
Q8VDJ3	VIGLN_MOUSE	Hdlbp	Vigilin	666434	451758	494073	465665	777008	774896	856576	474220	19.3461	18.7852	18.9144	18.8289	19.5676	19.5636	19.7082	18.8552	19.3461	18.7852	18.9144	18.8289	19.5676	19.5636	19.7082	18.8552	Hdlbp	0.45501	0.0969383	1.0135	4	4	1	0
Q8R0A0	T2FB_MOUSE	Gtf2f2	General transcription factor IIF subunit 2	153207	162358	270210	157516	228818	247461	282685	233509	17.2251	17.3088	18.0437	17.2651	17.8038	17.9168	18.1088	17.8331	17.2251	17.3088	18.0437	17.2651	17.8038	17.9168	18.1088	17.8331	Gtf2f2	0.454959	0.0701365	1.15406	4	4	1	0
Q3UCQ1	FOXK2_MOUSE	Foxk2	Forkhead box protein K2	14582.6	14985.9	17676.2	16138.3	19674.5	22027	23081.4	21997.6	13.832	13.8713	14.1095	13.9782	14.264	14.427	14.4944	14.4251	13.832	13.8713	14.1095	13.9782	14.264	14.427	14.4944	14.4251	Foxk2	0.454882	0.00120355	2.91954	4	4	1	0
Q8VI84	NOC3L_MOUSE	Noc3l	Nucleolar complex protein 3 homolog	45198.5	43538.5	52320.8	43707.3	39406.5	62159.6	75285.7	85976.2	15.464	15.41	15.6751	15.4156	15.2661	15.9237	16.2001	16.3916	15.464	15.41	15.6751	15.4156	15.2661	15.9237	16.2001	16.3916	Noc3l	0.454225	0.123657	0.907781	4	4	1	0
C0HKG5;C0HKG6	RNT2A_MOUSE;RNT2B_MOUSE	Rnaset2a;Rnaset2b	Ribonuclease T2-A	148441	138777	119055	124460	186017	185451	164597	188923	17.1795	17.0824	16.8613	16.9253	17.5051	17.5007	17.3286	17.5274	17.1795	17.0824	16.8613	16.9253	17.5051	17.5007	17.3286	17.5274	Rnaset2a;Rnaset2b	0.45331	0.00187554	2.72687	4	4	1	0
Q9DCH4	EIF3F_MOUSE	Eif3f	Eukaryotic translation initiation factor 3 subunit F	471953	382974	324893	425610	467068	576011	566580	575557	18.8483	18.5469	18.3096	18.6992	18.8333	19.1357	19.1119	19.1346	18.8483	18.5469	18.3096	18.6992	18.8333	19.1357	19.1119	19.1346	Eif3f	0.452895	0.0160891	1.79347	4	4	1	0
Q6ZWZ2	UB2R2_MOUSE	Ube2r2	Ubiquitin-conjugating enzyme E2 R2	56378	41723.8	21556.2	37615.9	66888	49518.1	44335.9	45575.9	15.7828	15.3486	14.3958	15.1991	16.0295	15.5957	15.4362	15.476	15.7828	15.3486	14.3958	15.1991	16.0295	15.5957	15.4362	15.476	Ube2r2	0.45275	0.206903	0.684234	4	4	1	0
P81183	IKZF2_MOUSE	Ikzf2	Zinc finger protein Helios			9356.26		6011.41	10109.8	11014.5				13.1917		12.5535	13.3035	13.4271		12.2035	12.1943	13.1917	12.2163	12.5535	13.3035	13.4271	12.3248	Ikzf2	0.450754	0.266164	0.57485	3	1	1	0
Q14B46	RTKN2_MOUSE	Rtkn2	Rhotekin-2	3349.72	5038.8	2578.95	2880.77	3755.76	4787.99			11.7098	12.2989	11.3326	11.4922	11.8749	12.2252			11.7098	12.2989	11.3326	11.4922	11.8749	12.2252	12.2107	12.3248	Rtkn2	0.450538	0.101422	0.993867	2	4	1	0
Q9D1E8	PLCE_MOUSE	Agpat5	1-acyl-sn-glycerol-3-phosphate acyltransferase epsilon	59585.9	75373.6	68179.8	71668.1	79488.8	100286	90928.6	105547	15.8627	16.2018	16.0571	16.129	16.2785	16.6138	16.4724	16.6875	15.8627	16.2018	16.0571	16.129	16.2785	16.6138	16.4724	16.6875	Agpat5	0.45041	0.00809545	2.09176	4	4	1	0
Q3UZ18	ICE2_MOUSE	Ice2	Little elongation complex subunit 2		10052.5	13445	6228.28	9207.4	11216.9	11278.2	11871.8		13.2953	13.7148	12.6046	13.1686	13.4534	13.4612	13.5353	12.2035	13.2953	13.7148	12.6046	13.1686	13.4534	13.4612	13.5353	Ice2	0.450068	0.244278	0.612115	4	3	1	0
Q9DAJ4	WDR83_MOUSE	Wdr83	WD repeat domain-containing protein 83	21151.7	19523.1	15860	18088.7	24855.7	23960	22974.3	30150.7	14.3685	14.2529	13.9531	14.1428	14.6013	14.5483	14.4877	14.8799	14.3685	14.2529	13.9531	14.1428	14.6013	14.5483	14.4877	14.8799	Wdr83	0.449995	0.0108977	1.96266	4	4	1	0
P16627	HS71L_MOUSE	Hspa1l	Heat shock 70 kDa protein 1-like	84764	88368.2	90768.1	75860.1	115373	115421	126939	106179	16.3712	16.4312	16.4699	16.2111	16.8159	16.8165	16.9538	16.6961	16.3712	16.4312	16.4699	16.2111	16.8159	16.8165	16.9538	16.6961	Hspa1l	0.449763	0.00115549	2.93723	4	4	1	0
Q9D1M0	SEC13_MOUSE	Sec13	Protein SEC13 homolog	191368	139961	206039	233415	228861	258316	279490	270634	17.546	17.0947	17.6526	17.8325	17.8041	17.9788	18.0924	18.046	17.546	17.0947	17.6526	17.8325	17.8041	17.9788	18.0924	18.046	Sec13	0.44889	0.0380133	1.42006	4	4	1	0
Q99L48	NMD3_MOUSE	Nmd3	60S ribosomal export protein NMD3	15587	18720.7	17299.6	16620.4	18525.1	21801.5	29779.7	24214	13.9281	14.1923	14.0785	14.0207	14.1772	14.4121	14.862	14.5636	13.9281	14.1923	14.0785	14.0207	14.1772	14.4121	14.862	14.5636	Nmd3	0.448852	0.0266569	1.57419	4	4	1	0
Q11204	SIA4B_MOUSE	St3gal2	CMP-N-acetylneuraminate-beta-galactosamide-alpha-2,3-sialyltransferase 2	14547.2	11092.8	10017.2	13676.2	13791.9	14581.9	19883.9	19187.6	13.8285	13.4373	13.2902	13.7394	13.7515	13.8319	14.2793	14.2279	13.8285	13.4373	13.2902	13.7394	13.7515	13.8319	14.2793	14.2279	St3gal2	0.448816	0.0511321	1.29131	4	4	1	0
Q6P5E6	GGA2_MOUSE	Gga2	ADP-ribosylation factor-binding protein GGA2	34970.6	31269.6	44320.5	36970.8	49348.1	43933	49899.2	57416.7	15.0939	14.9325	15.4357	15.1741	15.5907	15.423	15.6067	15.8092	15.0939	14.9325	15.4357	15.1741	15.5907	15.423	15.6067	15.8092	Gga2	0.448381	0.0142982	1.84472	4	4	1	0
O88425	NDK6_MOUSE	Nme6	Nucleoside diphosphate kinase 6	6134.28				9226.15	10437.8			12.5827				13.1715	13.3495			12.5827	12.1943	12.2707	12.2163	13.1715	13.3495	12.2107	12.3248	Nme6	0.448135	0.190335	0.720481	2	1	1	0
Q9R1Q7	PLP2_MOUSE	Plp2	Proteolipid protein 2	190599	40573.1	36610.5	38739.2	121956	60444.9	115471	44557.9	17.5402	15.3082	15.16	15.2415	16.896	15.8833	16.8172	15.4434	17.5402	15.3082	15.16	15.2415	16.896	15.8833	16.8172	15.4434	Plp2	0.447501	0.53368	0.272719	4	4	1	0
Q3U829	AP5Z1_MOUSE	Ap5z1	AP-5 complex subunit zeta-1		7998.99		9116.66	9382.04	11692.4	6211.74	8624.85		12.9656		13.1543	13.1957	13.5133	12.6008	13.0743	12.2035	12.9656	12.2707	13.1543	13.1957	13.5133	12.6008	13.0743	Ap5z1	0.447471	0.194525	0.711025	4	2	1	0
E9QN31	E9QN31_MOUSE	Nop2	NOP2 nucleolar protein	335455	254879	271970	251467	366147	371906	423627	350164	18.3558	17.9595	18.0531	17.94	18.4821	18.5046	18.6924	18.4177	18.3558	17.9595	18.0531	17.94	18.4821	18.5046	18.6924	18.4177	Nop2	0.447109	0.00741865	2.12968	4	4	1	0
Q80XP8	FA76B_MOUSE	Fam76b	Protein FAM76B	63939.3	43746	39063	42669.2	72912	62144.6	57058.2	62283.5	15.9644	15.4169	15.2535	15.3809	16.1539	15.9233	15.8001	15.9266	15.9644	15.4169	15.2535	15.3809	16.1539	15.9233	15.8001	15.9266	Fam76b	0.447054	0.0422617	1.37405	4	4	1	0
E9Q3C1	C2CD2_MOUSE	C2cd2	C2 domain-containing protein 2	14584.3	12248.9	15613.1	15388.5	16673.3	19111.6	24294.2	19143.4	13.8321	13.5804	13.9305	13.9096	14.0253	14.2222	14.5683	14.2246	13.8321	13.5804	13.9305	13.9096	14.0253	14.2222	14.5683	14.2246	C2cd2	0.446942	0.0180221	1.74419	4	4	1	0
Q8BTJ4	ENPP4_MOUSE	Enpp4	Bis(5'-adenosyl)-triphosphatase enpp4	6401.19	5019.3	10139.2	8217.88	8787.77	11116.7	8064.59	11705.2	12.6441	12.2933	13.3077	13.0046	13.1013	13.4404	12.9774	13.5149	12.6441	12.2933	13.3077	13.0046	13.1013	13.4404	12.9774	13.5149	Enpp4	0.446092	0.131265	0.881852	4	4	1	0
Q9CQF6	ADPPT_MOUSE	Aasdhppt	L-aminoadipate-semialdehyde dehydrogenase-phosphopantetheinyl transferase	41147.4	33695.7	34779.1	27660.4	42935.5	46702.3	56856.7	40296.8	15.3285	15.0403	15.0859	14.7555	15.3899	15.5112	15.795	15.2984	15.3285	15.0403	15.0859	14.7555	15.3899	15.5112	15.795	15.2984	Aasdhppt	0.446063	0.0313596	1.50363	4	4	1	0
Q6A051	ATRN1_MOUSE	Atrnl1	Attractin-like protein 1	10331.8		25633.8		13652.9	18627.4	15560		13.3348		14.6458		13.7369	14.1851	13.9256		13.3348	12.1943	14.6458	12.2163	13.7369	14.1851	13.9256	12.3248	Atrnl1	0.445309	0.556049	0.254887	3	2	1	0
Q9D8C4	IN35_MOUSE	Ifi35	Interferon-induced 35 kDa protein homolog	34161.6	14665.6	12085.1	10217	26295.9	22737.3	17288.5	20543.1	15.0601	13.8401	13.5609	13.3187	14.6826	14.4728	14.0775	14.3264	15.0601	13.8401	13.5609	13.3187	14.6826	14.4728	14.0775	14.3264	Ifi35	0.444838	0.316395	0.49977	4	4	1	0
P48754	BRCA1_MOUSE	Brca1	Breast cancer type 1 susceptibility protein homolog	32156.9	36961.2	35742.1	24103.6	31496.9	48682.7	48539.7	47220	14.9728	15.1737	15.1253	14.557	14.9429	15.5711	15.5669	15.5271	14.9728	15.1737	15.1253	14.557	14.9429	15.5711	15.5669	15.5271	Brca1	0.444792	0.076015	1.1191	4	4	1	0
Q91WR3	ASCC2_MOUSE	Ascc2	Activating signal cointegrator 1 complex subunit 2	16400.8	13825.1	15154.3	14895.3	18355.5	17233.4	22219.6	24991.7	14.0015	13.755	13.8874	13.8626	14.1639	14.0729	14.4395	14.6092	14.0015	13.755	13.8874	13.8626	14.1639	14.0729	14.4395	14.6092	Ascc2	0.444765	0.0157962	1.80145	4	4	1	0
Q80TN4	DJC16_MOUSE	Dnajc16	DnaJ homolog subfamily C member 16	34644.7	25471.6	29585.6	23151.2	31994.8	41561	40464.2	38535.8	15.0803	14.6366	14.8526	14.4988	14.9655	15.3429	15.3044	15.2339	15.0803	14.6366	14.8526	14.4988	14.9655	15.3429	15.3044	15.2339	Dnajc16	0.444602	0.0272049	1.56535	4	4	1	0
Q3U2A8	SYVM_MOUSE	Vars2	Valine--tRNA ligase, mitochondrial	22656	19334.1	20013	19404	20443.3	24389.3	17833.4	65595.3	14.4676	14.2389	14.2886	14.2441	14.3193	14.574	14.1223	16.0013	14.4676	14.2389	14.2886	14.2441	14.3193	14.574	14.1223	16.0013	Vars2	0.44443	0.340394	0.468019	4	4	1	0
Q810S1	MCUB_MOUSE	Mcub	Calcium uniporter regulatory subunit MCUb, mitochondrial	34012.3	28646.5	36043.5	35399.2	37570	46152.6	47183.1	52086.3	15.0538	14.8061	15.1375	15.1114	15.1973	15.4941	15.526	15.6686	15.0538	14.8061	15.1375	15.1114	15.1973	15.4941	15.526	15.6686	Mcub	0.444324	0.0118515	1.92623	4	4	1	0
Q9D2C6	RPC8_MOUSE	Polr3h	DNA-directed RNA polymerase III subunit RPC8	6146.53	7272.02	6751.32	4881.98	4884.41	9891.75	6596.22	15841.8	12.5856	12.8281	12.721	12.2533	12.254	13.272	12.6874	13.9514	12.5856	12.8281	12.721	12.2533	12.254	13.272	12.6874	13.9514	Polr3h	0.444237	0.296723	0.527648	4	4	1	0
Q80UK7	SAS6_MOUSE	Sass6	Spindle assembly abnormal protein 6 homolog	23905.6	26319.6	25190.9	25068.9	31352.9	38427.4	32741.5	34510.2	14.5451	14.6838	14.6206	14.6136	14.9363	15.2298	14.9988	15.0747	14.5451	14.6838	14.6206	14.6136	14.9363	15.2298	14.9988	15.0747	Sass6	0.444147	0.00068489	3.16438	4	4	1	0
Q9D8H7	OMA1_MOUSE	Oma1	Metalloendopeptidase OMA1, mitochondrial	47487.3	53908.7	68387.6	49646.6	56441.8	71868.5	94213.9	77918.4	15.5353	15.7182	16.0614	15.5994	15.7845	16.1331	16.5237	16.2497	15.5353	15.7182	16.0614	15.5994	15.7845	16.1331	16.5237	16.2497	Oma1	0.444135	0.0608613	1.21566	4	4	1	0
Q8C569	F118B_MOUSE	Fam118b	Protein FAM118B	37839.6	38630.9	51366	27668.7	45247.6	50295.1	56433.3	55352.5	15.2076	15.2375	15.6485	14.756	15.4656	15.6181	15.7843	15.7564	15.2076	15.2375	15.6485	14.756	15.4656	15.6181	15.7843	15.7564	Fam118b	0.443683	0.0647466	1.18878	4	4	1	0
P70371	TERF1_MOUSE	Terf1	Telomeric repeat-binding factor 1	137624	103918	74607.7	90229.5	119132	139543	160955	123034	17.0704	16.6651	16.187	16.4613	16.8622	17.0904	17.2963	16.9087	17.0704	16.6651	16.187	16.4613	16.8622	17.0904	17.2963	16.9087	Terf1	0.443435	0.0798682	1.09763	4	4	1	0
Q9JIQ3	DBLOH_MOUSE	Diablo	Diablo IAP-binding mitochondrial protein	84373.9	71019.5	49877.4	51896.1	89990.3	95371.2	80075.3	77135.1	16.3645	16.1159	15.6061	15.6633	16.4575	16.5413	16.2891	16.2351	16.3645	16.1159	15.6061	15.6633	16.4575	16.5413	16.2891	16.2351	Diablo	0.443261	0.0642917	1.19184	4	4	1	0
Q8VC42	RMC1_MOUSE	Rmc1	Regulator of MON1-CCZ1 complex	118715	85288.3	66023.3	102826	134290	126455	112296	122731	16.8571	16.3801	16.0107	16.6498	17.035	16.9483	16.7769	16.9051	16.8571	16.3801	16.0107	16.6498	17.035	16.9483	16.7769	16.9051	Rmc1	0.441902	0.0595546	1.22508	4	4	1	0
Q80TZ9	RERE_MOUSE	Rere	Arginine-glutamic acid dipeptide repeats protein	18865.2	7297.77	14744.1	12808.6	19320.5	19095	16796.6	14283.1	14.2034	12.8332	13.8479	13.6448	14.2378	14.2209	14.0359	13.802	14.2034	12.8332	13.8479	13.6448	14.2378	14.2209	14.0359	13.802	Rere	0.441825	0.200879	0.697065	4	4	1	0
O35218	CPSF2_MOUSE	Cpsf2	Cleavage and polyadenylation specificity factor subunit 2	212842	142945	193125	181881	218647	219046	286034	265520	17.6994	17.1251	17.5592	17.4726	17.7382	17.7409	18.1258	18.0185	17.6994	17.1251	17.5592	17.4726	17.7382	17.7409	18.1258	18.0185	Cpsf2	0.441768	0.0306027	1.51424	4	4	1	0
Q8BMI4	GEN_MOUSE	Gen1	Flap endonuclease GEN homolog 1	39955.3	10832.3	12762.3	31692.7	25254.8	22292.2	27422.4	38570.3	15.2861	13.4031	13.6396	14.9519	14.6243	14.4443	14.7431	15.2352	15.2861	13.4031	13.6396	14.9519	14.6243	14.4443	14.7431	15.2352	Gen1	0.441544	0.409737	0.387495	4	4	1	0
Q7TNB8	SBNO2_MOUSE	Sbno2	Protein strawberry notch homolog 2	16969.8	14119.8	11316.7	18217.7	21871	22714.9	20033.5	16845.4	14.0507	13.7854	13.4662	14.1531	14.4167	14.4714	14.2901	14.0401	14.0507	13.7854	13.4662	14.1531	14.4167	14.4714	14.2901	14.0401	Sbno2	0.440736	0.0508757	1.29349	4	4	1	0
Q8K012	FBP1L_MOUSE	Fnbp1l	Formin-binding protein 1-like	18232	23170.1	24703	23859.7	20894	38916.7	29750.5	34926.8	14.1542	14.5	14.5924	14.5423	14.3508	15.2481	14.8606	15.092	14.1542	14.5	14.5924	14.5423	14.3508	15.2481	14.8606	15.092	Fnbp1l	0.440682	0.0917241	1.03752	4	4	1	0
Q9DCS3	MECR_MOUSE	Mecr	Enoyl-[acyl-carrier-protein] reductase, mitochondrial	66838.7	82557.5	84917.5	80469.6	71212	113878	133927	117804	16.0284	16.3331	16.3738	16.2962	16.1198	16.7971	17.0311	16.846	16.0284	16.3331	16.3738	16.2962	16.1198	16.7971	17.0311	16.846	Mecr	0.44066	0.0852946	1.06908	4	4	1	0
Q3U6K5	SPAT6_MOUSE	Spata6	Spermatogenesis-associated protein 6	5788.83	4249.67	5311.47	6512.06	5887.14	8783.48	7715.78	7234.34	12.4991	12.0531	12.3749	12.6689	12.5234	13.1006	12.9136	12.8206	12.4991	12.0531	12.3749	12.6689	12.5234	13.1006	12.9136	12.8206	Spata6	0.440546	0.0474549	1.32372	4	4	1	0
Q9Z2L6	MINP1_MOUSE	Minpp1	Multiple inositol polyphosphate phosphatase 1	21990.8	25953.5	26683.6	23705.5	24387.8	29385.6	39156	43520.7	14.4246	14.6636	14.7037	14.5329	14.5739	14.8428	15.2569	15.4094	14.4246	14.6636	14.7037	14.5329	14.5739	14.8428	15.2569	15.4094	Minpp1	0.43955	0.0718398	1.14363	4	4	1	0
Q8R0J7	VP37B_MOUSE	Vps37b	Vacuolar protein sorting-associated protein 37B	10486.6	9533.53	9647.08	9489.51	14015.6	17021	25285.8		13.3563	13.2188	13.2359	13.2121	13.7747	14.055	14.626		13.3563	13.2188	13.2359	13.2121	13.7747	14.055	14.626	12.3248	Vps37b	0.439399	0.405378	0.392139	3	4	1	0
P29699	FETUA_MOUSE	Ahsg	Alpha-2-HS-glycoprotein	40571.9	33505.4	77580.3	36794.9	47783.6	43071.1	80263.5	79421.4	15.3082	15.0321	16.2434	15.1672	15.5442	15.3944	16.2925	16.2772	15.3082	15.0321	16.2434	15.1672	15.5442	15.3944	16.2925	16.2772	Ahsg	0.439359	0.271488	0.56625	4	4	1	0
Q9DBN9	DDX59_MOUSE	Ddx59	Probable ATP-dependent RNA helicase DDX59	5542.02	4866.61	4618.59	4828.8	9101.17	6826.38	3631.27	9007.84	12.4362	12.2487	12.1732	12.2374	13.1518	12.7369	11.8263	13.137	12.4362	12.2487	12.1732	12.2374	13.1518	12.7369	11.8263	13.137	Ddx59	0.439095	0.213932	0.669725	4	4	1	0
P56960	EXOSX_MOUSE	Exosc10	Exosome complex component 10	100766	121251	95258.6	104441	121596	136442	161362	153194	16.6206	16.8876	16.5396	16.6723	16.8917	17.0579	17.2999	17.225	16.6206	16.8876	16.5396	16.6723	16.8917	17.0579	17.2999	17.225	Exosc10	0.438607	0.00971665	2.01248	4	4	1	0
E9Q5B6	E9Q5B6_MOUSE	Hnrnpd	Heterogeneous nuclear ribonucleoprotein D (Fragment)	8750.42	6466.56	11408.2	7394.05	7401.2	12840.5	5105.28	33175.5	13.0951	12.6588	13.4778	12.8521	12.8535	13.6484	12.3178	15.0178	13.0951	12.6588	13.4778	12.8521	12.8535	13.6484	12.3178	15.0178	Hnrnpd	0.438428	0.501319	0.299886	4	4	1	0
Q8BRH3	RHG19_MOUSE	Arhgap19	Rho GTPase-activating protein 19	14653.9	11852.5	12816.5	11258.8	12444.3	16886.7	12729.5	31594.8	13.839	13.5329	13.6457	13.4588	13.6032	14.0436	13.6359	14.9474	13.839	13.5329	13.6457	13.4588	13.6032	14.0436	13.6359	14.9474	Arhgap19	0.438426	0.224558	0.648672	4	4	1	0
P56382	ATP5E_MOUSE	Atp5f1e	ATP synthase subunit epsilon, mitochondrial	197893	27658.9	28195.8	100409	111039	95787.2	44294.6	110865	17.5944	14.7555	14.7832	16.6155	16.7607	16.5475	15.4348	16.7584	17.5944	14.7555	14.7832	16.6155	16.7607	16.5475	15.4348	16.7584	Atp5f1e	0.43825	0.590647	0.228672	4	4	1	0
O88520	SHOC2_MOUSE	Shoc2	Leucine-rich repeat protein SHOC-2	29013.3	27711.5	28972.5	25389.2	36843	40561.5	34937.9	38127.1	14.8244	14.7582	14.8224	14.6319	15.1691	15.3078	15.0925	15.2185	14.8244	14.7582	14.8224	14.6319	15.1691	15.3078	15.0925	15.2185	Shoc2	0.437753	0.000473123	3.32503	4	4	1	0
Q9CQA0	CENPM_MOUSE	Cenpm	Centromere protein M	20132.8	14928.6	26847.4	18048	25417.5	27918.6	26056.5	26487.9	14.2973	13.8658	14.7125	14.1396	14.6335	14.7689	14.6694	14.693	14.2973	13.8658	14.7125	14.1396	14.6335	14.7689	14.6694	14.693	Cenpm	0.437444	0.0504814	1.29687	4	4	1	0
Q8VDP2	STEEP_MOUSE	Steep1	STING ER exit protein	26506.5	22669.7	32423.3	24357.8	28402.3	36914.8	41240.2	36808.8	14.6941	14.4685	14.9847	14.5721	14.7937	15.1719	15.3318	15.1678	14.6941	14.4685	14.9847	14.5721	14.7937	15.1719	15.3318	15.1678	Steep1	0.436446	0.0339788	1.46879	4	4	1	0
Q9D8M7	PHF10_MOUSE	Phf10	PHD finger protein 10	68798.6	69570.7	80571.5	42205.4	79668.1	94773.9	78340.1	91893.5	16.0701	16.0862	16.298	15.3651	16.2817	16.5322	16.2575	16.4877	16.0701	16.0862	16.298	15.3651	16.2817	16.5322	16.2575	16.4877	Phf10	0.434912	0.0896329	1.04753	4	4	1	0
P67778	PHB1_MOUSE	Phb1	Prohibitin 1	360425	284334	449329	387615	369116	527129	632215	483335	18.4593	18.1172	18.7774	18.5643	18.4937	19.0078	19.2701	18.8827	18.4593	18.1172	18.7774	18.5643	18.4937	19.0078	19.2701	18.8827	Phb1	0.433997	0.0869127	1.06092	4	4	1	0
O54956	DPOE2_MOUSE	Pole2	DNA polymerase epsilon subunit 2	74193.5	61041.9	62934.1	67850.8	83854.2	89452.1	88983.9	96249.7	16.179	15.8975	15.9416	16.0501	16.3556	16.4488	16.4413	16.5545	16.179	15.8975	15.9416	16.0501	16.3556	16.4488	16.4413	16.5545	Pole2	0.433006	0.00116653	2.9331	4	4	1	0
Q6ZQJ5	DNA2_MOUSE	Dna2	DNA replication ATP-dependent helicase/nuclease DNA2	111289	99510.1	107376	99264.2	132880	154092	176551	108323	16.764	16.6026	16.7123	16.599	17.0198	17.2334	17.4297	16.725	16.764	16.6026	16.7123	16.599	17.0198	17.2334	17.4297	16.725	Dna2	0.432524	0.032669	1.48586	4	4	1	0
Q8K2Y9	CCM2_MOUSE	Ccm2	Cerebral cavernous malformations protein 2 homolog	99615.1	75849.7	91294.7	72323.7	135515	125951	153213	63223.6	16.6041	16.2109	16.4782	16.1422	17.0481	16.9425	17.2252	15.9482	16.6041	16.2109	16.4782	16.1422	17.0481	16.9425	17.2252	15.9482	Ccm2	0.432148	0.208903	0.680054	4	4	1	0
Q9DCM4	DNAL4_MOUSE	Dnal4	Dynein axonemal light chain 4	7012.81	10962.7	7867.32	9209.83	11645.9	9670.16	13666.6	11994	12.7758	13.4203	12.9417	13.169	13.5075	13.2393	13.7384	13.55	12.7758	13.4203	12.9417	13.169	13.5075	13.2393	13.7384	13.55	Dnal4	0.432136	0.0473746	1.32445	4	4	1	0
Q6NZD2	Q6NZD2_MOUSE	Snx1	Sorting nexin-1	268868	302223	354850	306214	321330	409857	500030	442959	18.0365	18.2053	18.4368	18.2242	18.2937	18.6448	18.9317	18.7568	18.0365	18.2053	18.4368	18.2242	18.2937	18.6448	18.9317	18.7568	Snx1	0.431026	0.034019	1.46828	4	4	1	0
A2ANY6	A2ANY6_MOUSE	Mdn1	Midasin	87194.8	77707.3	88823.6	69381.4	80715.7	109438	135112	115320	16.412	16.2458	16.4387	16.0823	16.3006	16.7398	17.0438	16.8153	16.412	16.2458	16.4387	16.0823	16.3006	16.7398	17.0438	16.8153	Mdn1	0.43019	0.0502771	1.29863	4	4	1	0
Q99PT1	GDIR1_MOUSE	Arhgdia	Rho GDP-dissociation inhibitor 1	1090100	755244	609898	921809	1131110	1309640	962474	1069560	20.056	19.5266	19.2182	19.8141	20.1093	20.3207	19.8764	20.0286	20.056	19.5266	19.2182	19.8141	20.1093	20.3207	19.8764	20.0286	Arhgdia	0.430023	0.0788725	1.10307	4	4	1	0
A0A140LIF8	IRGM2_MOUSE	Irgm2	Immunity-related GTPase family M protein 2	26395.7	31378.9	28773.6	27041.3	35400.2	34122.1	42633.4	41213.7	14.688	14.9375	14.8125	14.7229	15.1115	15.0584	15.3797	15.3308	14.688	14.9375	14.8125	14.7229	15.1115	15.0584	15.3797	15.3308	Irgm2	0.429891	0.00440827	2.35573	4	4	1	0
A2AKX3	SETX_MOUSE	Setx	Probable helicase senataxin	44521.6	35477.5	21868.4	20586.2	32638.1	49944.5	47367.9	30326.1	15.4422	15.1146	14.4166	14.3294	14.9943	15.608	15.5316	14.8883	15.4422	15.1146	14.4166	14.3294	14.9943	15.608	15.5316	14.8883	Setx	0.429854	0.236314	0.626511	4	4	1	0
Q60866	PTER_MOUSE	Pter	Phosphotriesterase-related protein	28225.7	22874.1	30671.6	22066.2	27037.3	32323.1	43624.8	37724	14.7847	14.4814	14.9046	14.4296	14.7227	14.9803	15.4129	15.2032	14.7847	14.4814	14.9046	14.4296	14.7227	14.9803	15.4129	15.2032	Pter	0.42967	0.0622078	1.20616	4	4	1	0
Q9CWY4	GEMI7_MOUSE	Gemin7	Gem-associated protein 7	52586.5	47212	34680	75985.4	62785.5	60919.4	77828.1	72323.5	15.6824	15.5269	15.0818	16.2134	15.9381	15.8946	16.248	16.1422	15.6824	15.5269	15.0818	16.2134	15.9381	15.8946	16.248	16.1422	Gemin7	0.429604	0.134021	0.872828	4	4	1	0
Q91VB4	HPS3_MOUSE	Hps3	BLOC-2 complex member HPS3	15419.4	15471.3	13431	17004.8	21280.5	21004.1	20852	19165.1	13.9125	13.9173	13.7133	14.0537	14.3772	14.3584	14.3479	14.2262	13.9125	13.9173	13.7133	14.0537	14.3772	14.3584	14.3479	14.2262	Hps3	0.428255	0.0015298	2.81537	4	4	1	0
Q91ZE0	TMLH_MOUSE	Tmlhe	Trimethyllysine dioxygenase, mitochondrial	15216.3	13635.8	16290.6		18490.4	12227.3	14998.7	15536.7	13.8933	13.7351	13.9918		14.1745	13.5778	13.8725	13.9234	13.8933	13.7351	13.9918	12.2163	14.1745	13.5778	13.8725	13.9234	Tmlhe	0.427936	0.363426	0.439584	4	3	1	0
Q6P5F7	TTYH3_MOUSE	Ttyh3	Protein tweety homolog 3	15533.9	14045.9	10983.5	12315.7	21747.6	18288.6	12844.9	18906.5	13.9231	13.7779	13.4231	13.5882	14.4086	14.1587	13.6489	14.2066	13.9231	13.7779	13.4231	13.5882	14.4086	14.1587	13.6489	14.2066	Ttyh3	0.427618	0.0708359	1.14975	4	4	1	0
Q9DCL2	CIA2A_MOUSE	Ciao2a	Cytosolic iron-sulfur assembly component 2A	13484	12647.8	12194.4	13210.6	14852.7	18781.9	15213.7	21177.2	13.719	13.6266	13.5739	13.6894	13.8584	14.1971	13.8931	14.3702	13.719	13.6266	13.5739	13.6894	13.8584	14.1971	13.8931	14.3702	Ciao2a	0.427475	0.0152865	1.81569	4	4	1	0
Q6IQY5	CEP70_MOUSE	Cep70	Centrosomal protein of 70 kDa	13111.9	20909.2	19939.6	18781.6	21676.3	22683.9	27310.6	24985.8	13.6786	14.3519	14.2833	14.197	14.4038	14.4694	14.7372	14.6088	13.6786	14.3519	14.2833	14.197	14.4038	14.4694	14.7372	14.6088	Cep70	0.427096	0.0458582	1.33858	4	4	1	0
P62862	RS30_MOUSE	Fau	Ubiquitin-like FUBI-ribosomal protein eS30 fusion protein	191140	294916	427639	243091	309605	318469	484999	400330	17.5443	18.1699	18.706	17.8911	18.2401	18.2808	18.8876	18.6108	17.5443	18.1699	18.706	17.8911	18.2401	18.2808	18.8876	18.6108	Fau	0.426982	0.189734	0.721854	4	4	1	0
P13705	MSH3_MOUSE	Msh3	DNA mismatch repair protein Msh3	17584.2	19334.2	14119.7	17606	19118.9	26562.8	32193.2	16875.1	14.102	14.2389	13.7854	14.1038	14.2227	14.6971	14.9745	14.0426	14.102	14.2389	13.7854	14.1038	14.2227	14.6971	14.9745	14.0426	Msh3	0.426712	0.118729	0.925445	4	4	1	0
Q9JKB1	UCHL3_MOUSE	Uchl3	Ubiquitin carboxyl-terminal hydrolase isozyme L3	238445	257051	172220	239283	302479	294764	287436	321694	17.8633	17.9717	17.3939	17.8684	18.2065	18.1692	18.1329	18.2953	17.8633	17.9717	17.3939	17.8684	18.2065	18.1692	18.1329	18.2953	Uchl3	0.426661	0.0188989	1.72356	4	4	1	0
F6RUI8	F6RUI8_MOUSE	Maskbp3	Multiple ankyrin repeats single KH domain binding protein 3 (Fragment)	18288.5	8867.14	3780.26	11493.2	18816.5	13986.6	9850.09	8871.13	14.1586	13.1143	11.8843	13.4885	14.1997	13.7718	13.2659	13.1149	14.1586	13.1143	11.8843	13.4885	14.1997	13.7718	13.2659	13.1149	Maskbp3	0.426657	0.45777	0.339353	4	4	1	0
Q7TQK4	EXOS3_MOUSE	Exosc3	Exosome complex component RRP40	31270.1	22229	28072.1	17760.6	27076	27507.2	47534.1	31919.8	14.9325	14.4402	14.7768	14.1164	14.7247	14.7475	15.5367	14.9622	14.9325	14.4402	14.7768	14.1164	14.7247	14.7475	15.5367	14.9622	Exosc3	0.426299	0.155219	0.809055	4	4	1	0
E9Q624;E9QA22	E9Q624_MOUSE;E9QA22_MOUSE	Zfp644	Zinc finger protein 644	20999.3	14036	20349.8	20049.8	24805.8	24288.8	27790.3	23405.5	14.3581	13.7768	14.3127	14.2913	14.5984	14.568	14.7623	14.5146	14.3581	13.7768	14.3127	14.2913	14.5984	14.568	14.7623	14.5146	Zfp644	0.426081	0.0271967	1.56548	4	4	1	0
P04117	FABP4_MOUSE	Fabp4	Fatty acid-binding protein, adipocyte	16498.8	14021.2	17128.6	20042.5	23589.6	12677.6	31976.4	26944.4	14.0101	13.7753	14.0641	14.2908	14.5259	13.63	14.9647	14.7177	14.0101	13.7753	14.0641	14.2908	14.5259	13.63	14.9647	14.7177	Fabp4	0.424496	0.219146	0.659266	4	4	1	0
Q9D7P6	ISCU_MOUSE	Iscu	Iron-sulfur cluster assembly enzyme ISCU	43953.6	36161.8	44218.3	42026.2	56075	55072	62827.3	49338.1	15.4237	15.1422	15.4324	15.359	15.7751	15.749	15.9391	15.5904	15.4237	15.1422	15.4324	15.359	15.7751	15.749	15.9391	15.5904	Iscu	0.424098	0.00503516	2.29799	4	4	1	0
Q8VEJ1	GPN2_MOUSE	Gpn2	GPN-loop GTPase 2	12152.5	14903.9	18191.1	14498	20833.9	18186	22306.2	18300.8	13.569	13.8634	14.1509	13.8236	14.3466	14.1505	14.4452	14.1596	13.569	13.8634	14.1509	13.8236	14.3466	14.1505	14.4452	14.1596	Gpn2	0.423771	0.022826	1.64157	4	4	1	0
Q9D937	CK098_MOUSE		Uncharacterized protein C11orf98 homolog	8487.2	8690.41	9384.23	12030.5	7298.74	14746.4	15327.9	16333.5	13.0511	13.0852	13.196	13.5544	12.8334	13.8481	13.9039	13.9955	13.0511	13.0852	13.196	13.5544	12.8334	13.8481	13.9039	13.9955		0.423553	0.201937	0.694783	4	4	1	0
Q3UMW7	MAPK3_MOUSE	Mapkapk3	MAP kinase-activated protein kinase 3	340107	332442	395091	315271	453195	448972	543041	411178	18.3756	18.3427	18.5918	18.2662	18.7898	18.7763	19.0507	18.6494	18.3756	18.3427	18.5918	18.2662	18.7898	18.7763	19.0507	18.6494	Mapkapk3	0.422428	0.0083376	2.07896	4	4	1	0
Q9DCP9	DAZP2_MOUSE	Dazap2	DAZ-associated protein 2	2440.86	2573	2897.07				2690.27		11.2532	11.3292	11.5004				11.3935		11.2532	11.3292	11.5004	12.2163	12.0989	12.1714	11.3935	12.3248	Dazap2	0.422382	0.211217	0.675271	1	3	1	0
Q9ESU7	Q9ESU7_MOUSE	Slc1a5	Amino acid transporter	13638.2	8444.81	11867.2	10111.2	19891	12899.4	11145	15578	13.7354	13.0438	13.5347	13.3037	14.2798	13.655	13.4441	13.9272	13.7354	13.0438	13.5347	13.3037	14.2798	13.655	13.4441	13.9272	Slc1a5	0.422151	0.121468	0.915538	4	4	1	0
Q9CRC3	CO040_MOUSE		UPF0235 protein C15orf40 homolog	47516.3	34444.6	41077	34809.8	53253	46602.9	63614	47707.2	15.5361	15.072	15.326	15.0872	15.7006	15.5081	15.9571	15.5419	15.5361	15.072	15.326	15.0872	15.7006	15.5081	15.9571	15.5419		0.421577	0.0310477	1.50797	4	4	1	0
Q9CQP3	CHCH5_MOUSE	Chchd5	Coiled-coil-helix-coiled-coil-helix domain-containing protein 5	16489.6	17024.9	15462.5	13651.9	22239.5	21324.5	21124.2	19020.7	14.0093	14.0554	13.9165	13.7368	14.4408	14.3802	14.3666	14.2153	14.0093	14.0554	13.9165	13.7368	14.4408	14.3802	14.3666	14.2153	Chchd5	0.421256	0.00259114	2.58651	4	4	1	0
Q8BGB8	COQ4_MOUSE	Coq4	Ubiquinone biosynthesis protein COQ4 homolog, mitochondrial	14091	12810.6	12013	13274.7	12063.4	17647	19783.7	21953.9	13.7825	13.6451	13.5523	13.6964	13.5583	14.1071	14.272	14.4222	13.7825	13.6451	13.5523	13.6964	13.5583	14.1071	14.272	14.4222	Coq4	0.420865	0.0737556	1.13221	4	4	1	0
Q9DBY1	SYVN1_MOUSE	Syvn1	E3 ubiquitin-protein ligase synoviolin	24888.2	25164.6	45893.1	24514.2	28053.6	77753.5	36109.2	28691.7	14.6032	14.6191	15.486	14.5813	14.7759	16.2466	15.1401	14.8083	14.6032	14.6191	15.486	14.5813	14.7759	16.2466	15.1401	14.8083	Syvn1	0.420335	0.344323	0.463034	4	4	1	0
P51410	RL9_MOUSE	Rpl9	Large ribosomal subunit protein uL6	558620	505517	638436	485010	674769	766660	743866	728732	19.0915	18.9474	19.2842	18.8877	19.364	19.5482	19.5047	19.475	19.0915	18.9474	19.2842	18.8877	19.364	19.5482	19.5047	19.475	Rpl9	0.420307	0.00481528	2.31738	4	4	1	0
Q8CG72	ADPRS_MOUSE	Adprs	ADP-ribosylhydrolase ARH3	45949.3	32336.5	28839.4	38922.2	66186.3	58592.8	33007.9	41765.3	15.4878	14.9809	14.8158	15.2483	16.0142	15.8384	15.0105	15.35	15.4878	14.9809	14.8158	15.2483	16.0142	15.8384	15.0105	15.35	Adprs	0.420133	0.174388	0.758484	4	4	1	0
Q91YP0	L2HDH_MOUSE	L2hgdh	L-2-hydroxyglutarate dehydrogenase, mitochondrial	16772.4	15716.8	18660	18494	21696.6	21360.2	21493.5	29266.1	14.0338	13.94	14.1877	14.1748	14.4052	14.3826	14.3916	14.8369	14.0338	13.94	14.1877	14.1748	14.4052	14.3826	14.3916	14.8369	L2hgdh	0.420031	0.0156852	1.80451	4	4	1	0
Q8BPM0	DAAM1_MOUSE	Daam1	Disheveled-associated activator of morphogenesis 1	45507.3	44356.8	49942.8	47355.5	49284.6	58564.5	76624.8	69170.8	15.4738	15.4369	15.608	15.5312	15.5888	15.8377	16.2255	16.0779	15.4738	15.4369	15.608	15.5312	15.5888	15.8377	16.2255	16.0779	Daam1	0.420019	0.0271367	1.56644	4	4	1	0
Q62165	DAG1_MOUSE	Dag1	Dystroglycan 1	8897.51	8587.75	30202.9	10954.3	14219.1	12041.3	25057	18871	13.1192	13.0681	14.8824	13.4192	13.7955	13.5557	14.6129	14.2039	13.1192	13.0681	14.8824	13.4192	13.7955	13.5557	14.6129	14.2039	Dag1	0.419799	0.421233	0.375477	4	4	1	0
D3Z3Y1;D3Z4I0;D3YTQ6	D3YTQ6_MOUSE;D3Z3Y1_MOUSE;D3Z4I0_MOUSE	Pigg	Phosphatidylinositol glycan anchor biosynthesis, class G	6552.5	7006.28		4324.7	10819.3	6883.57	6874.57	6128.85	12.6778	12.7744		12.0784	13.4013	12.7489	12.7471	12.5814	12.6778	12.7744	12.2707	12.0784	13.4013	12.7489	12.7471	12.5814	Pigg	0.419333	0.138377	0.858937	4	3	1	0
Q61179	IRF9_MOUSE	Irf9	Interferon regulatory factor 9	27301.3	39175.5	38349	48963.8	44863.2	45963.3	53056.9	58673.6	14.7367	15.2577	15.2269	15.5794	15.4532	15.4882	15.6953	15.8404	14.7367	15.2577	15.2269	15.5794	15.4532	15.4882	15.6953	15.8404	Irf9	0.41911	0.0765996	1.11577	4	4	1	0
Q9CRC8	LRC40_MOUSE	Lrrc40	Leucine-rich repeat-containing protein 40	50297.3	25693.8	34409.8	35500.9	49271.6	47027.5	53473.5	40721.9	15.6182	14.6491	15.0705	15.1156	15.5885	15.5212	15.7065	15.3135	15.6182	14.6491	15.0705	15.1156	15.5885	15.5212	15.7065	15.3135	Lrrc40	0.419078	0.0989282	1.00468	4	4	1	0
P05064	ALDOA_MOUSE	Aldoa	Fructose-bisphosphate aldolase A	498661	464504	444240	413826	628798	567427	635416	600086	18.9277	18.8253	18.761	18.6587	19.2622	19.1141	19.2773	19.1948	18.9277	18.8253	18.761	18.6587	19.2622	19.1141	19.2773	19.1948	Aldoa	0.418947	0.000817277	3.08763	4	4	1	0
Q8BID8	FXL14_MOUSE	Fbxl14	F-box/LRR-repeat protein 14	11358.5	14525	13014.2	11188.8	14245	19689.4	15378.5	17748.3	13.4715	13.8263	13.6678	13.4498	13.7982	14.2651	13.9086	14.1154	13.4715	13.8263	13.6678	13.4498	13.7982	14.2651	13.9086	14.1154	Fbxl14	0.418004	0.0225526	1.6468	4	4	1	0
Q9JIB0	MOG1_MOUSE	Rangrf	Ran guanine nucleotide release factor	32548.1	25607.5	25267.4	25606.5	27029.4	35730.9	45664.3	38917.1	14.9903	14.6443	14.625	14.6442	14.7222	15.1249	15.4788	15.2481	14.9903	14.6443	14.625	14.6442	14.7222	15.1249	15.4788	15.2481	Rangrf	0.417561	0.0608715	1.21559	4	4	1	0
P62774	MTPN_MOUSE	Mtpn	Myotrophin	278872	448714	573692	382534	416829	306776	735684	925163	18.0892	18.7754	19.1299	18.5452	18.6691	18.2268	19.4887	19.8193	18.0892	18.7754	19.1299	18.5452	18.6691	18.2268	19.4887	19.8193	Mtpn	0.416043	0.366465	0.435968	4	4	1	0
Q8K1Z0	COQ9_MOUSE	Coq9	Ubiquinone biosynthesis protein COQ9, mitochondrial	77208.1	104192	96171.5	97001	92970.8	140123	116552	156391	16.2365	16.6689	16.5533	16.5657	16.5045	17.0963	16.8306	17.2548	16.2365	16.6689	16.5533	16.5657	16.5045	17.0963	16.8306	17.2548	Coq9	0.415463	0.0703106	1.15298	4	4	1	0
Q9CQM2	ERD22_MOUSE	Kdelr2	ER lumen protein-retaining receptor 2	9008.85	8031.37	10394	6663.99	12505.2	11493.8	11062.6	9951.11	13.1371	12.9714	13.3435	12.7022	13.6102	13.4886	13.4334	13.2806	13.1371	12.9714	13.3435	12.7022	13.6102	13.4886	13.4334	13.2806	Kdelr2	0.414665	0.0340904	1.46737	4	4	1	0
E9Q4T4	E9Q4T4_MOUSE	Ccdc71l	Coiled-coil domain containing 71 like	6553.22	3700.62	5523.46	9208	7122.88	7917.02	8402.44	8217.97	12.678	11.8536	12.4314	13.1687	12.7982	12.9507	13.0366	13.0046	12.678	11.8536	12.4314	13.1687	12.7982	12.9507	13.0366	13.0046	Ccdc71l	0.414644	0.187064	0.728011	4	4	1	0
Q9JKV1	ADRM1_MOUSE	Adrm1	Proteasomal ubiquitin receptor ADRM1	18881.6	16585.2	22057.4	16165.9	23001.6	20464.2	29389.5	25472.4	14.2047	14.0176	14.429	13.9807	14.4894	14.3208	14.843	14.6366	14.2047	14.0176	14.429	13.9807	14.4894	14.3208	14.843	14.6366	Adrm1	0.414495	0.0336665	1.4728	4	4	1	0
A0A0J9YTS3	A0A0J9YTS3_MOUSE	Eif2b4	Eukaryotic translation initiation factor 2B, subunit 4 delta (Fragment)	72114	77314.5	57365.7	90473.2	95151.1	104078	91167	101062	16.138	16.2385	15.8079	16.4652	16.5379	16.6673	16.4762	16.6249	16.138	16.2385	15.8079	16.4652	16.5379	16.6673	16.4762	16.6249	Eif2b4	0.414199	0.0275612	1.5597	4	4	1	0
Q9WTW4	TFEC_MOUSE	Tfec	Transcription factor EC	7720.2	7912.24	9343.24	7087.22	8145.85	11164.1	9055.73	15477.7	12.9144	12.9499	13.1897	12.791	12.9918	13.4466	13.1446	13.9179	12.9144	12.9499	13.1897	12.791	12.9918	13.4466	13.1446	13.9179	Tfec	0.413986	0.109488	0.960632	4	4	1	0
O88824	JTB_MOUSE	Jtb	Protein JTB	6394.19	5514	8095.79	8090.12	8800.33	14924.7	4119.28	13442.4	12.6425	12.4289	12.983	12.9819	13.1033	13.8654	12.0082	13.7145	12.6425	12.4289	12.983	12.9819	13.1033	13.8654	12.0082	13.7145	Jtb	0.413776	0.386499	0.412852	4	4	1	0
Q9R062	GLYG_MOUSE	Gyg1	Glycogenin-1	422801	379339	384167	314500	440739	518905	538354	493870	18.6896	18.5331	18.5514	18.2627	18.7496	18.9851	19.0382	18.9138	18.6896	18.5331	18.5514	18.2627	18.7496	18.9851	19.0382	18.9138	Gyg1	0.412455	0.00919123	2.03663	4	4	1	0
Q5NCQ5	DPH1_MOUSE	Dph1	2-(3-amino-3-carboxypropyl)histidine synthase subunit 1	20236.2	18206.8	19609.6	20686.1	20494.6	28345	26026.6	30858.8	14.3047	14.1522	14.2593	14.3364	14.323	14.7908	14.6677	14.9134	14.3047	14.1522	14.2593	14.3364	14.323	14.7908	14.6677	14.9134	Dph1	0.410592	0.021739	1.66276	4	4	1	0
O88455	DHCR7_MOUSE	Dhcr7	7-dehydrocholesterol reductase	13781.7	11389.5	8608.18	16504.7	16073.3	14093.4	14138	21736.2	13.7505	13.4754	13.0715	14.0106	13.9724	13.7827	13.7873	14.4078	13.7505	13.4754	13.0715	14.0106	13.9724	13.7827	13.7873	14.4078	Dhcr7	0.410562	0.150009	0.823883	4	4	1	0
P15306	TRBM_MOUSE	Thbd	Thrombomodulin	30609.4	20677.4	10628.2	12712.1	20338.2	29130.3	24052.1	18716.6	14.9017	14.3358	13.3756	13.6339	14.3119	14.8302	14.5539	14.192	14.9017	14.3358	13.3756	13.6339	14.3119	14.8302	14.5539	14.192	Thbd	0.410266	0.314051	0.503	4	4	1	0
Q80Y81	RNZ2_MOUSE	Elac2	Zinc phosphodiesterase ELAC protein 2	71261.3	83152.4	100414	72962.3	88857.4	98369.9	124342	124480	16.1208	16.3435	16.6156	16.1549	16.4392	16.5859	16.924	16.9256	16.1208	16.3435	16.6156	16.1549	16.4392	16.5859	16.924	16.9256	Elac2	0.409969	0.0495473	1.30498	4	4	1	0
Q9CZL2	F241A_MOUSE	Fam241a	Uncharacterized protein FAM241A	80846.2	49067	59658.5	71650.6	102244	92438.9	83552.5	66858.3	16.3029	15.5825	15.8644	16.1287	16.6417	16.4962	16.3504	16.0288	16.3029	15.5825	15.8644	16.1287	16.6417	16.4962	16.3504	16.0288	Fam241a	0.409649	0.0924419	1.03413	4	4	1	0
Q07243	MTF1_MOUSE	Mtf1	Metal regulatory transcription factor 1	5986.94	5546.05	2586.18	6589.22	6889.47	7578.97	5281.4	6365.25	12.5476	12.4372	11.3366	12.6859	12.7502	12.8878	12.3667	12.636	12.5476	12.4372	11.3366	12.6859	12.7502	12.8878	12.3667	12.636	Mtf1	0.408331	0.260161	0.584757	4	4	1	0
Q3UV08	Q3UV08_MOUSE	Ncor1	Nuclear receptor corepressor 1 (Fragment)	30488.1	29083.4	25761.4	26112	34979.1	30238.1	39897.5	43840.8	14.896	14.8279	14.6529	14.6724	15.0942	14.8841	15.284	15.42	14.896	14.8279	14.6529	14.6724	15.0942	14.8841	15.284	15.42	Ncor1	0.408267	0.0205292	1.68763	4	4	1	0
G5E861	SCLT1_MOUSE	Sclt1	Sodium channel and clathrin linker 1		7173.38	8692.62		6030.68	6833.65	11088.9	9489.85		12.8084	13.0856		12.5581	12.7384	13.4368	13.2122	12.2035	12.8084	13.0856	12.2163	12.5581	12.7384	13.4368	13.2122	Sclt1	0.407924	0.222891	0.651907	4	2	1	0
Q9ES34	UBE3B_MOUSE	Ube3b	Ubiquitin-protein ligase E3B	18029.8	14226.5	20618.6	16581.8	17029.6	23722.5	29523	22704	14.1381	13.7963	14.3317	14.0173	14.0558	14.534	14.8496	14.4707	14.1381	13.7963	14.3317	14.0173	14.0558	14.534	14.8496	14.4707	Ube3b	0.406644	0.0857605	1.06671	4	4	1	0
Q9DBY0	FOXP4_MOUSE	Foxp4	Forkhead box protein P4	34013.1	39636.5	42589	34736	41299.3	53866.7	54423.2	50864.4	15.0538	15.2745	15.3782	15.0841	15.3338	15.7171	15.7319	15.6344	15.0538	15.2745	15.3782	15.0841	15.3338	15.7171	15.7319	15.6344	Foxp4	0.406639	0.0151212	1.82041	4	4	1	0
Q8BUE4	FSP1_MOUSE	Aifm2	Ferroptosis suppressor protein 1	100889	46743.6	51456.3	62944.4	104040	113420	91850.9	43497.9	16.6224	15.5125	15.6511	15.9418	16.6668	16.7913	16.487	15.4087	16.6224	15.5125	15.6511	15.9418	16.6668	16.7913	16.487	15.4087	Aifm2	0.406504	0.350012	0.455917	4	4	1	0
Q9ERG2	STRN3_MOUSE	Strn3	Striatin-3	103327	99368.9	98353.2	96825	113703	139393	130025	146405	16.6569	16.6005	16.5857	16.5631	16.7949	17.0888	16.9884	17.1596	16.6569	16.6005	16.5857	16.5631	16.7949	17.0888	16.9884	17.1596	Strn3	0.406401	0.00251558	2.59936	4	4	1	0
E9PVA2	E9PVA2_MOUSE	Rrp8	Ribosomal RNA-processing protein 8	138745	141099	121816	127157	183893	161681	176199	178602	17.0821	17.1063	16.8943	16.9563	17.4885	17.3028	17.4268	17.4464	17.0821	17.1063	16.8943	16.9563	17.4885	17.3028	17.4268	17.4464	Rrp8	0.406378	0.000742697	3.12919	4	4	1	0
Q8VHN8	TIRR_MOUSE	Nudt16l1	Tudor-interacting repair regulator protein	156585	121753	90962.8	174860	177033	171839	168769	181770	17.2566	16.8936	16.473	17.4158	17.4337	17.3907	17.3647	17.4718	17.2566	16.8936	16.473	17.4158	17.4337	17.3907	17.3647	17.4718	Nudt16l1	0.405447	0.103014	0.987105	4	4	1	0
Q99K43	PRC1_MOUSE	Prc1	Protein regulator of cytokinesis 1	157810	162095	143675	180768	205693	237431	188303	222261	17.2678	17.3065	17.1324	17.4638	17.6501	17.8571	17.5227	17.7619	17.2678	17.3065	17.1324	17.4638	17.6501	17.8571	17.5227	17.7619	Prc1	0.405334	0.00647103	2.18903	4	4	1	0
Q9D0L7	ARM10_MOUSE	Armc10	Armadillo repeat-containing protein 10	97768.5	159454	181830	187462	185051	189034	219551	212742	16.5771	17.2828	17.4722	17.5162	17.4976	17.5283	17.7442	17.6987	16.5771	17.2828	17.4722	17.5162	17.4976	17.5283	17.7442	17.6987	Armc10	0.405115	0.123342	0.908889	4	4	1	0
Q99LC9	PEX6_MOUSE	Pex6	Peroxisomal ATPase PEX6	18393.4	16325.8	22208.2	17053.3	19607.8	23862.1	25459.5	29310.2	14.1669	13.9949	14.4388	14.0578	14.2591	14.5424	14.6359	14.8391	14.1669	13.9949	14.4388	14.0578	14.2591	14.5424	14.6359	14.8391	Pex6	0.404568	0.0404253	1.39335	4	4	1	0
P16056	MET_MOUSE	Met	Hepatocyte growth factor receptor	22838.4	28373.6	32064.7	31644.5	36472.4	37500.6	37831.4	38936.5	14.4792	14.7923	14.9687	14.9497	15.1545	15.1946	15.2073	15.2488	14.4792	14.7923	14.9687	14.9497	15.1545	15.1946	15.2073	15.2488	Met	0.403869	0.012583	1.90021	4	4	1	0
P70182	PI51A_MOUSE	Pip5k1a	Phosphatidylinositol 4-phosphate 5-kinase type-1 alpha	29620.6	32012	36909.4	26632.9	29888.5	35745.7	52340.5	50893.1	14.8543	14.9663	15.1717	14.7009	14.8673	15.1255	15.6756	15.6352	14.8543	14.9663	15.1717	14.7009	14.8673	15.1255	15.6756	15.6352	Pip5k1a	0.402587	0.11838	0.926722	4	4	1	0
Q9CX53	GEMI6_MOUSE	Gemin6	Gem-associated protein 6	41217.4	49703.2	34961.3	50462.8	55393.1	65680.5	49223.3	61572.6	15.331	15.6011	15.0935	15.6229	15.7574	16.0032	15.5871	15.91	15.331	15.6011	15.0935	15.6229	15.7574	16.0032	15.5871	15.91	Gemin6	0.402307	0.0408252	1.38907	4	4	1	0
Q0KL01	UBX2B_MOUSE	Ubxn2b	UBX domain-containing protein 2B	59438.2	33148.7	32804.9	40340.3	32742.6	63497	64928.6	58887.9	15.8591	15.0167	15.0016	15.2999	14.9989	15.9544	15.9866	15.8457	15.8591	15.0167	15.0016	15.2999	14.9989	15.9544	15.9866	15.8457	Ubxn2b	0.402052	0.240134	0.619546	4	4	1	0
Q9CX97	WDR55_MOUSE	Wdr55	WD repeat-containing protein 55	55154.4	63148.2	66070.5	70551.1	51502.4	92970.9	93849.8	110056	15.7512	15.9465	16.0117	16.1064	15.6524	16.5045	16.5181	16.7479	15.7512	15.9465	16.0117	16.1064	15.6524	16.5045	16.5181	16.7479	Wdr55	0.401762	0.162607	0.78886	4	4	1	0
Q9JHS3	LTOR2_MOUSE	Lamtor2	Ragulator complex protein LAMTOR2	9645.35	9119.02	6204.43	5807.17	12304.4	14732.7	6435.89	8274.54	13.2356	13.1547	12.5991	12.5036	13.5869	13.8467	12.6519	13.0145	13.2356	13.1547	12.5991	12.5036	13.5869	13.8467	12.6519	13.0145	Lamtor2	0.401756	0.26844	0.571153	4	4	1	0
Q3TV70	NR2CA_MOUSE	Nr2c2ap	Nuclear receptor 2C2-associated protein	32901	25300.3	13250.7	18248.3	32378.2	23951.2	21586.9	36597.2	15.0058	14.6269	13.6938	14.1555	14.9827	14.5478	14.3979	15.1594	15.0058	14.6269	13.6938	14.1555	14.9827	14.5478	14.3979	15.1594	Nr2c2ap	0.401473	0.277797	0.556273	4	4	1	0
P51949	MAT1_MOUSE	Mnat1	CDK-activating kinase assembly factor MAT1	50897	43407.8	49647	38312.7	62670.3	59146.1	63817.7	54056.7	15.6353	15.4057	15.5994	15.2255	15.9355	15.852	15.9617	15.7222	15.6353	15.4057	15.5994	15.2255	15.9355	15.852	15.9617	15.7222	Mnat1	0.401358	0.0103353	1.98568	4	4	1	0
Q91VR2	ATPG_MOUSE	Atp5f1c	ATP synthase subunit gamma, mitochondrial	2184100	1914300	1480460	1968420	2228970	2550260	2487100	2621190	21.0586	20.8684	20.4976	20.9086	21.0879	21.2822	21.246	21.3218	21.0586	20.8684	20.4976	20.9086	21.0879	21.2822	21.246	21.3218	Atp5f1c	0.401192	0.0212982	1.67166	4	4	1	0
Q921H9	COA7_MOUSE	Coa7	Cytochrome c oxidase assembly factor 7	33147.2	45407.2	32328.2	38164.7	49537.8	40193.3	57838.2	48896.4	15.0166	15.4706	14.9805	15.22	15.5962	15.2947	15.8197	15.5774	15.0166	15.4706	14.9805	15.22	15.5962	15.2947	15.8197	15.5774	Coa7	0.400099	0.0424274	1.37235	4	4	1	0
Q3U3S3	CENPL_MOUSE	Cenpl	Centromere protein L	39250.4	37672.4	31368.2	47663.5	46436.3	53122.9	55518.2	48939.7	15.2604	15.2012	14.937	15.5406	15.503	15.697	15.7607	15.5787	15.2604	15.2012	14.937	15.5406	15.503	15.697	15.7607	15.5787	Cenpl	0.400038	0.0264048	1.57832	4	4	1	0
Q91VM9	IPYR2_MOUSE	Ppa2	Inorganic pyrophosphatase 2, mitochondrial	148441	143667	163140	162989	150494	165221	240285	287563	17.1795	17.1324	17.3158	17.3144	17.1993	17.334	17.8744	18.1335	17.1795	17.1324	17.3158	17.3144	17.1993	17.334	17.8744	18.1335	Ppa2	0.399806	0.12722	0.895444	4	4	1	0
Q8BZN4	NUAK2_MOUSE	Nuak2	NUAK family SNF1-like kinase 2	23989.4	34483.7	25773.5	26967.5	33327.5	33544.4	38285.1	40593.7	14.5501	15.0736	14.6536	14.7189	15.0244	15.0338	15.2245	15.309	14.5501	15.0736	14.6536	14.7189	15.0244	15.0338	15.2245	15.309	Nuak2	0.398851	0.0246494	1.60819	4	4	1	0
Q9JJ11	TACC3_MOUSE	Tacc3	Transforming acidic coiled-coil-containing protein 3	80851	76451.8	63525.9	79978.7	104713	107006	83300.2	101500	16.303	16.2223	15.9551	16.2873	16.6761	16.7073	16.346	16.6311	16.303	16.2223	15.9551	16.2873	16.6761	16.7073	16.346	16.6311	Tacc3	0.398235	0.013806	1.85993	4	4	1	0
Q8R1T1	CHMP7_MOUSE	Chmp7	Charged multivesicular body protein 7	29577.7	26919	29742.1	26547.8	36424.1	33960.3	37973	40374.8	14.8522	14.7163	14.8602	14.6963	15.1526	15.0516	15.2127	15.3012	14.8522	14.7163	14.8602	14.6963	15.1526	15.0516	15.2127	15.3012	Chmp7	0.398235	0.00110571	2.95636	4	4	1	0
P06339	HA15_MOUSE	H2-T23	H-2 class I histocompatibility antigen, D-37 alpha chain	28583.2	25120.1	34520.3	33201.8	22766.4	26658.3	28389.2	143815	14.8029	14.6166	15.0752	15.019	14.4746	14.7023	14.7931	17.1339	14.8029	14.6166	15.0752	15.019	14.4746	14.7023	14.7931	17.1339	H2-T23	0.397565	0.552326	0.257805	4	4	1	0
Q8VDB2	ALG12_MOUSE	Alg12	Dol-P-Man:Man(7)GlcNAc(2)-PP-Dol alpha-1,6-mannosyltransferase	13158.8	8999.99	17028.8	16204	17697.1	15487.7	19721.3	18192.8	13.6837	13.1357	14.0557	13.9841	14.1112	13.9188	14.2675	14.1511	13.6837	13.1357	14.0557	13.9841	14.1112	13.9188	14.2675	14.1511	Alg12	0.397352	0.122799	0.910807	4	4	1	0
Q3U108	ARI5A_MOUSE	Arid5a	AT-rich interactive domain-containing protein 5A	18598.8	22826.1	23078.3	22907.5	28962.7	25322.2	28575.2	32221	14.1829	14.4784	14.4942	14.4835	14.8219	14.6281	14.8025	14.9757	14.1829	14.4784	14.4942	14.4835	14.8219	14.6281	14.8025	14.9757	Arid5a	0.397278	0.00871013	2.05998	4	4	1	0
A0A1L1SSF8	A0A1L1SSF8_MOUSE	4931406C07Rik	RIKEN cDNA 4931406C07 gene	30041.1	36099.1	34216.9	26802.1	36480.8	40222.2	45700.9	44554.8	14.8747	15.1397	15.0624	14.7101	15.1548	15.2957	15.4799	15.4433	14.8747	15.1397	15.0624	14.7101	15.1548	15.2957	15.4799	15.4433	4931406C07Rik	0.396744	0.0173549	1.76058	4	4	1	0
Q9D2G2	ODO2_MOUSE	Dlst	Dihydrolipoyllysine-residue succinyltransferase component of 2-oxoglutarate dehydrogenase complex, mitochondrial	101527	63408.2	59154.5	70386.2	118522	94695.6	76194.2	93984.1	16.6315	15.9524	15.8522	16.103	16.8548	16.531	16.2174	16.5201	16.6315	15.9524	15.8522	16.103	16.8548	16.531	16.2174	16.5201	Dlst	0.396059	0.11754	0.929813	4	4	1	0
Q9CT10	RANB3_MOUSE	Ranbp3	Ran-binding protein 3	766817	376859	198153	540541	577970	597355	439946	609042	19.5485	18.5237	17.5963	19.044	19.1406	19.1882	18.747	19.2162	19.5485	18.5237	17.5963	19.044	19.1406	19.1882	18.747	19.2162	Ranbp3	0.394881	0.395025	0.403375	4	4	1	0
P56565	S10A1_MOUSE	S100a1	Protein S100-A1	7233.69	8652.37		4668.38	8162.74	3897.65	10951.7	12377.3	12.8205	13.0789		12.1887	12.9948	11.9284	13.4189	13.5954	12.8205	13.0789	12.2707	12.1887	12.9948	11.9284	13.4189	13.5954	S100a1	0.394666	0.395468	0.402888	4	3	1	0
Q66GT5	PTPM1_MOUSE	Ptpmt1	Phosphatidylglycerophosphatase and protein-tyrosine phosphatase 1	66156.3	30228	58839.6	42675	54407.7	59631.5	61426.2	75030.1	16.0136	14.8836	15.8445	15.3811	15.7315	15.8638	15.9066	16.1952	16.0136	14.8836	15.8445	15.3811	15.7315	15.8638	15.9066	16.1952	Ptpmt1	0.393567	0.19795	0.703444	4	4	1	0
Q99NG0	ARIP4_MOUSE	Rad54l2	Helicase ARIP4	12884.2	12968.5	13246	13304.7	15203.2	20096.5	16047.2	17883	13.6533	13.6627	13.6933	13.6996	13.8921	14.2947	13.97	14.1263	13.6533	13.6627	13.6933	13.6996	13.8921	14.2947	13.97	14.1263	Rad54l2	0.393531	0.0046632	2.33132	4	4	1	0
Q8R3J4	MTEF3_MOUSE	Mterf3	Transcription termination factor 3, mitochondrial	7908.63	7734.76	11151.7	8896.01	11427.3	9774.75	12264.5	13176	12.9492	12.9171	13.445	13.1189	13.4802	13.2548	13.5822	13.6856	12.9492	12.9171	13.445	13.1189	13.4802	13.2548	13.5822	13.6856	Mterf3	0.393149	0.0413461	1.38357	4	4	1	0
Q7TN98	CPEB4_MOUSE	Cpeb4	Cytoplasmic polyadenylation element-binding protein 4	11181.7	12787.6	16891.4	14581.6	12599	17379.2	19180.2	24942.2	13.4489	13.6425	14.044	13.8319	13.621	14.0851	14.2273	14.6063	13.4489	13.6425	14.044	13.8319	13.621	14.0851	14.2273	14.6063	Cpeb4	0.393139	0.152827	0.815799	4	4	1	0
Q9CZU4	ERAL1_MOUSE	Eral1	GTPase Era, mitochondrial	17940.7	13556.9	17432	18769.4	18517.8	22412.8	18714.6	30465.5	14.1309	13.7267	14.0895	14.1961	14.1766	14.452	14.1919	14.8949	14.1309	13.7267	14.0895	14.1961	14.1766	14.452	14.1919	14.8949	Eral1	0.393048	0.0944109	1.02498	4	4	1	0
O08573	LEG9_MOUSE	Lgals9	Galectin-9	173968	218182	222730	193515	200505	250197	272164	355558	17.4085	17.7352	17.7649	17.5621	17.6133	17.9327	18.0541	18.4397	17.4085	17.7352	17.7649	17.5621	17.6133	17.9327	18.0541	18.4397	Lgals9	0.392292	0.0842614	1.07437	4	4	1	0
P60605	UB2G2_MOUSE	Ube2g2	Ubiquitin-conjugating enzyme E2 G2	103750	92178.9	98862.3	90601.8	112194	114921	131552	149668	16.6628	16.4921	16.5931	16.4673	16.7756	16.8103	17.0053	17.1914	16.6628	16.4921	16.5931	16.4673	16.7756	16.8103	17.0053	17.1914	Ube2g2	0.391828	0.0103051	1.98695	4	4	1	0
Q9D287	SPF27_MOUSE	Bcas2	Pre-mRNA-splicing factor SPF27	152563	199750	292224	177369	190744	247504	308797	321062	17.219	17.6078	18.1567	17.4364	17.5413	17.9171	18.2363	18.2925	17.219	17.6078	18.1567	17.4364	17.5413	17.9171	18.2363	18.2925	Bcas2	0.391793	0.18925	0.722964	4	4	1	0
Q923T9	KCC2G_MOUSE	Camk2g	Calcium/calmodulin-dependent protein kinase type II subunit gamma	96321	99417.4	103210	100532	120295	128709	132141	143673	16.5556	16.6012	16.6552	16.6173	16.8762	16.9738	17.0117	17.1324	16.5556	16.6012	16.6552	16.6173	16.8762	16.9738	17.0117	17.1324	Camk2g	0.391207	0.000464708	3.33282	4	4	1	0
Q9D3X9;Q922T2	MFA3L_MOUSE;MFAP3_MOUSE	Mfap3;Mfap3l	Microfibril-associated glycoprotein 3		7552.38	7244.01	3596.28	7853.69	10651.9		6903.09		12.8827	12.8226	11.8123	12.9392	13.3788		12.753	12.2035	12.8827	12.8226	11.8123	12.9392	13.3788	12.2107	12.753	Mfap3;Mfap3l	0.390156	0.311208	0.506949	3	3	1	0
Q8BZ03	KPCD2_MOUSE	Prkd2	Serine/threonine-protein kinase D2	43375.2	42963.3	33546	49364	59017.4	48844.8	59893.9	52723.1	15.4046	15.3908	15.0339	15.5912	15.8489	15.5759	15.8701	15.6861	15.4046	15.3908	15.0339	15.5912	15.8489	15.5759	15.8701	15.6861	Prkd2	0.390154	0.0282789	1.54854	4	4	1	0
P62331	ARF6_MOUSE	Arf6	ADP-ribosylation factor 6	268425	288069	228221	301073	350752	333312	356351	376103	18.0342	18.1361	17.8001	18.1998	18.4201	18.3465	18.4429	18.5208	18.0342	18.1361	17.8001	18.1998	18.4201	18.3465	18.4429	18.5208	Arf6	0.390068	0.00624373	2.20456	4	4	1	0
Q3TDV8	Q3TDV8_MOUSE	Zfp444	Zinc finger protein 444	1612.6	1844.51	5014.28		3516.58	2681.35	4322.74		10.6552	10.849	12.2918		11.78	11.3887	12.0777		10.6552	10.849	12.2918	12.2163	11.78	11.3887	12.0777	12.3248	Zfp444	0.389732	0.447864	0.348854	3	3	1	0
Q62120	JAK2_MOUSE	Jak2	Tyrosine-protein kinase JAK2	34123.5	37558.5	33440.2	29126.6	34715.1	46838.6	45757.1	49363.2	15.0585	15.1969	15.0293	14.83	15.0833	15.5154	15.4817	15.5911	15.0585	15.1969	15.0293	14.83	15.0833	15.5154	15.4817	15.5911	Jak2	0.389217	0.0292754	1.5335	4	4	1	0
O70405	ULK1_MOUSE	Ulk1	Serine/threonine-protein kinase ULK1								15943.1								13.9606	12.2035	12.1943	12.2707	12.2163	12.0989	12.1714	12.2107	13.9606	Ulk1	0.389181	0.421323	0.375385	1	0	0	0
P47968	RPIA_MOUSE	Rpia	Ribose-5-phosphate isomerase	262300	248284	337985	217713	273639	384919	356095	375280	18.0009	17.9216	18.3666	17.7321	18.0619	18.5542	18.4419	18.5176	18.0009	17.9216	18.3666	17.7321	18.0619	18.5542	18.4419	18.5176	Rpia	0.388616	0.0676346	1.16983	4	4	1	0
Q9JHD2	KAT2A_MOUSE	Kat2a	Histone acetyltransferase KAT2A	19761.7	13049	22084.7	18020.6	19656	22740.6	28645	23538.9	14.2704	13.6717	14.4308	14.1374	14.2627	14.473	14.806	14.5228	14.2704	13.6717	14.4308	14.1374	14.2627	14.473	14.806	14.5228	Kat2a	0.388557	0.0973699	1.01158	4	4	1	0
Q8BVA2	TM222_MOUSE	Tmem222	Transmembrane protein 222	39352.8	33931.9	34958.3	48833.4	56229.1	59810.3	41407.2	47991.1	15.2642	15.0504	15.0933	15.5756	15.779	15.8681	15.3376	15.5505	15.2642	15.0504	15.0933	15.5756	15.779	15.8681	15.3376	15.5505	Tmem222	0.387937	0.0610489	1.21432	4	4	1	0
Q8BJF9	CHM2B_MOUSE	Chmp2b	Charged multivesicular body protein 2b	22889.5	19116.1	7799.84	24522.6	26781.1	20189.8	15481.7	29295.6	14.4824	14.2225	12.9292	14.5818	14.7089	14.3013	13.9183	14.8384	14.4824	14.2225	12.9292	14.5818	14.7089	14.3013	13.9183	14.8384	Chmp2b	0.387747	0.407768	0.389587	4	4	1	0
Q9D4H8	CUL2_MOUSE	Cul2	Cullin-2	93428	90562.4	109823	105646	109026	133369	148173	133453	16.5116	16.4666	16.7448	16.6889	16.7343	17.0251	17.1769	17.026	16.5116	16.4666	16.7448	16.6889	16.7343	17.0251	17.1769	17.026	Cul2	0.387595	0.0147569	1.831	4	4	1	0
Q8K3G9	DP13B_MOUSE	Appl2	DCC-interacting protein 13-beta	5670.96	4566.09	4201.52	5791.64	6853.35	7623.05	4802.93	7351.67	12.4694	12.1567	12.0367	12.4998	12.7426	12.8962	12.2297	12.8439	12.4694	12.1567	12.0367	12.4998	12.7426	12.8962	12.2297	12.8439	Appl2	0.387432	0.0890167	1.05053	4	4	1	0
O89051	ITM2B_MOUSE	Itm2b	Integral membrane protein 2B	1991.63				6189.57			4743.13	10.9597				12.5956			12.2116	10.9597	12.1943	12.2707	12.2163	12.5956	12.1714	12.2107	12.2116	Itm2b	0.387052	0.288724	0.539517	2	1	1	0
Q80UP5	AN13A_MOUSE	Ankrd13a	Ankyrin repeat domain-containing protein 13A	305030	198913	172338	168987	293050	302513	304830	190993	18.2186	17.6018	17.3949	17.3666	18.1608	18.2066	18.2176	17.5432	18.2186	17.6018	17.3949	17.3666	18.1608	18.2066	18.2176	17.5432	Ankrd13a	0.386607	0.18294	0.737692	4	4	1	0
O70126	AURKB_MOUSE	Aurkb	Aurora kinase B	167840	140224	141241	148037	180627	191723	164314	252471	17.3567	17.0974	17.1078	17.1756	17.4627	17.5487	17.3261	17.9458	17.3567	17.0974	17.1078	17.1756	17.4627	17.5487	17.3261	17.9458	Aurkb	0.386418	0.0382185	1.41773	4	4	1	0
Q8BGA5	KRR1_MOUSE	Krr1	KRR1 small subunit processome component homolog	102441	87986.2	61545.4	84603.5	111194	109527	109011	103101	16.6444	16.425	15.9094	16.3684	16.7627	16.7409	16.7341	16.6537	16.6444	16.425	15.9094	16.3684	16.7627	16.7409	16.7341	16.6537	Krr1	0.386061	0.0483989	1.31516	4	4	1	0
Q8CFK2	TF3B_MOUSE	Brf1	Transcription factor IIIB 90 kDa subunit	32674.6	39796	42851.5	36954.8	37443.5	53192.2	56516.2	53316	14.9959	15.2803	15.3871	15.1735	15.1924	15.6989	15.7864	15.7023	14.9959	15.2803	15.3871	15.1735	15.1924	15.6989	15.7864	15.7023	Brf1	0.385816	0.051714	1.28639	4	4	1	0
Q8BIV3	RNBP6_MOUSE	Ranbp6	Ran-binding protein 6		4798.87			7364.82	8206.25	5326.42	4814.77		12.2285			12.8464	13.0025	12.379	12.2333	12.2035	12.2285	12.2707	12.2163	12.8464	13.0025	12.379	12.2333	Ranbp6	0.385523	0.0814295	1.08922	4	1	1	0
Q9Z0L1	S1PR4_MOUSE	S1pr4	Sphingosine 1-phosphate receptor 4	8023.5	7612.38	10823.4	9718.17	12513.8	9434.34	12112.4	13071	12.97	12.8941	13.4019	13.2465	13.6112	13.2037	13.5642	13.6741	12.97	12.8941	13.4019	13.2465	13.6112	13.2037	13.5642	13.6741	S1pr4	0.385184	0.0514596	1.28853	4	4	1	0
Q9DC48	PRP17_MOUSE	Cdc40	Pre-mRNA-processing factor 17	92707.9	64087.2	108884	73171.8	94745.5	85324.5	156571	108725	16.5004	15.9677	16.7324	16.159	16.5318	16.3807	17.2565	16.7303	16.5004	15.9677	16.7324	16.159	16.5318	16.3807	17.2565	16.7303	Cdc40	0.38491	0.184109	0.734926	4	4	1	0
Q3TZX8	NOL9_MOUSE	Nol9	Polynucleotide 5'-hydroxyl-kinase NOL9	71102.8	60121.4	38906.9	35427.2	72631.1	80860.7	87989.2	33133.8	16.1176	15.8756	15.2477	15.1126	16.1483	16.3032	16.425	15.016	16.1176	15.8756	15.2477	15.1126	16.1483	16.3032	16.425	15.016	Nol9	0.384747	0.378411	0.422036	4	4	1	0
Q75NR7	RECQ4_MOUSE	Recql4	ATP-dependent DNA helicase Q4	17227.3	14862.4	11818.2	11878.3	16270.7	10464.2	29445.1	20832.1	14.0724	13.8594	13.5287	13.536	13.99	13.3532	14.8457	14.3465	14.0724	13.8594	13.5287	13.536	13.99	13.3532	14.8457	14.3465	Recql4	0.384718	0.301912	0.520119	4	4	1	0
Q8VEE4	RFA1_MOUSE	Rpa1	Replication protein A 70 kDa DNA-binding subunit	255558	273986	298282	319117	281961	329714	383485	542949	17.9633	18.0637	18.1863	18.2837	18.1051	18.3309	18.5488	19.0505	17.9633	18.0637	18.1863	18.2837	18.1051	18.3309	18.5488	19.0505	Rpa1	0.384546	0.122166	0.91305	4	4	1	0
Q6PG95	CRML_MOUSE	Cramp1	Protein cramped-like	8977.08	9159.23		10087.4	12901.7	9120.92	10600.7	9523.76	13.132	13.161		13.3003	13.6553	13.155	13.3719	13.2173	13.132	13.161	12.2707	13.3003	13.6553	13.155	13.3719	13.2173	Cramp1	0.383845	0.190041	0.721152	4	3	1	0
Q8R2R1	POMT1_MOUSE	Pomt1	Protein O-mannosyl-transferase 1	49628.3	50027.5	58424.6	38075.2	39371.3	66572.3	80339.2	75935.6	15.5989	15.6104	15.8343	15.2166	15.2649	16.0226	16.2938	16.2125	15.5989	15.6104	15.8343	15.2166	15.2649	16.0226	16.2938	16.2125	Pomt1	0.383409	0.201814	0.695049	4	4	1	0
Q9D083	SPC24_MOUSE	Spc24	Kinetochore protein Spc24	191649	161783	254664	156626	222234	267778	264054	227379	17.5481	17.3037	17.9582	17.257	17.7617	18.0307	18.0105	17.7947	17.5481	17.3037	17.9582	17.257	17.7617	18.0307	18.0105	17.7947	Spc24	0.382651	0.0716312	1.1449	4	4	1	0
P35278	RAB5C_MOUSE	Rab5c	Ras-related protein Rab-5C	351472	311075	319662	276767	336587	426099	544076	357752	18.4231	18.2469	18.2862	18.0783	18.3606	18.7008	19.0534	18.4486	18.4231	18.2469	18.2862	18.0783	18.3606	18.7008	19.0534	18.4486	Rab5c	0.382261	0.0664356	1.1776	4	4	1	0
Q9CQF8	RT63_MOUSE	Mrpl57	Large ribosomal subunit protein mL63	68122.7	72275.5	61670	92918.4	81001.8	98854.9	93546.6	108629	16.0558	16.1412	15.9123	16.5037	16.3057	16.593	16.5134	16.729	16.0558	16.1412	15.9123	16.5037	16.3057	16.593	16.5134	16.729	Mrpl57	0.382028	0.0477562	1.32097	4	4	1	0
Q61466	SMRD1_MOUSE	Smarcd1	SWI/SNF-related matrix-associated actin-dependent regulator of chromatin subfamily D member 1	63874.4	84895.5	49746	62529	71266.6	90668.1	85883	87607.2	15.963	16.3734	15.6023	15.9322	16.1209	16.4683	16.3901	16.4188	15.963	16.3734	15.6023	15.9322	16.1209	16.4683	16.3901	16.4188	Smarcd1	0.381803	0.0732713	1.13507	4	4	1	0
Q8R1V4	TMED4_MOUSE	Tmed4	Transmembrane emp24 domain-containing protein 4	296194	240693	164121	279069	311029	308865	302932	323252	18.1762	17.8768	17.3244	18.0903	18.2467	18.2366	18.2086	18.3023	18.1762	17.8768	17.3244	18.0903	18.2467	18.2366	18.2086	18.3023	Tmed4	0.38164	0.0946612	1.02383	4	4	1	0
Q91YN5	UAP1_MOUSE	Uap1	UDP-N-acetylhexosamine pyrophosphorylase	41609.1	52000.8	30629.5	38092.8	53818.1	54733	42584.2	57935.4	15.3446	15.6662	14.9026	15.2172	15.7158	15.7401	15.378	15.8222	15.3446	15.6662	14.9026	15.2172	15.7158	15.7401	15.378	15.8222	Uap1	0.381348	0.0861509	1.06474	4	4	1	0
P49442	INPP_MOUSE	Inpp1	Inositol polyphosphate 1-phosphatase	15983.7	15723.7	15254.4	14608.6	18440.1	21085.1	18145.1	22824.2	13.9643	13.9407	13.8969	13.8345	14.1706	14.3639	14.1473	14.4783	13.9643	13.9407	13.8969	13.8345	14.1706	14.3639	14.1473	14.4783	Inpp1	0.380907	0.00402649	2.39507	4	4	1	0
Q69ZJ7	RIC1_MOUSE	Ric1	Guanine nucleotide exchange factor subunit RIC1	19196.9	19627.3	21033.8	11839.4	26369.6	15455.6	25341.2	26088.7	14.2286	14.2606	14.3604	13.5313	14.6866	13.9158	14.6292	14.6711	14.2286	14.2606	14.3604	13.5313	14.6866	13.9158	14.6292	14.6711	Ric1	0.380469	0.203503	0.691429	4	4	1	0
D3YVM8	D3YVM8_MOUSE	Bloc1s1	Biogenesis of lysosome-related organelles complex 1 subunit 1	34843.4	19412.4	19446.5	36440.4	56513.3	41346.3	17354.2	33927.3	15.0886	14.2447	14.2472	15.1533	15.7863	15.3355	14.083	15.0502	15.0886	14.2447	14.2472	15.1533	15.7863	15.3355	14.083	15.0502	Bloc1s1	0.380292	0.420859	0.375864	4	4	1	0
V9GXX7;A0A0A0MQ99	A0A0A0MQ99_MOUSE;V9GXX7_MOUSE	Swi5	DNA repair protein SWI5 homolog	128172	148285	190274	111770	158906	211383	241587	142619	16.9677	17.178	17.5377	16.7702	17.2778	17.6895	17.8822	17.1218	16.9677	17.178	17.5377	16.7702	17.2778	17.6895	17.8822	17.1218	Swi5	0.379419	0.166586	0.778362	4	4	1	0
Q9D8X0	MANBL_MOUSE	Manbal	Protein MANBAL	24295	17150.5	18364.4	19054.7	28091.8	25410	25223.4	23181.8	14.5684	14.066	14.1646	14.2179	14.7779	14.6331	14.6225	14.5007	14.5684	14.066	14.1646	14.2179	14.7779	14.6331	14.6225	14.5007	Manbal	0.379333	0.0216764	1.66401	4	4	1	0
Q8K0Q5	RHG18_MOUSE	Arhgap18	Rho GTPase-activating protein 18	32067.4	23002.7	35121.8	19297	34957.6	32874	32215.2	38592.6	14.9688	14.4895	15.1001	14.2361	15.0933	15.0047	14.9755	15.236	14.9688	14.4895	15.1001	14.2361	15.0933	15.0047	14.9755	15.236	Arhgap18	0.378741	0.122428	0.91212	4	4	1	0
Q9R1K5	FZR1_MOUSE	Fzr1	Fizzy-related protein homolog		24200.2	21327	17760.9	16032.7	25802	17779.8	16793.9		14.5627	14.3804	14.1164	13.9687	14.6552	14.118	14.0356	12.2035	14.5627	14.3804	14.1164	13.9687	14.6552	14.118	14.0356	Fzr1	0.378615	0.529275	0.276318	4	3	1	0
Q9WV96	T10B_MOUSE	Timm10b	Mitochondrial import inner membrane translocase subunit Tim10 B	8306.02	7557.74	6658.07	6792.26	11957.4	9000.62	8941.23	8418.7	13.0199	12.8837	12.7009	12.7297	13.5456	13.1358	13.1263	13.0394	13.0199	12.8837	12.7009	12.7297	13.5456	13.1358	13.1263	13.0394	Timm10b	0.378205	0.0314179	1.50282	4	4	1	0
Q9CQV5	RT24_MOUSE	Mrps24	Small ribosomal subunit protein uS3m	33690.7	24678.5	25123.1	26625	26690.6	34673.5	44199.2	38766.2	15.0401	14.591	14.6167	14.7005	14.704	15.0815	15.4317	15.2425	15.0401	14.591	14.6167	14.7005	14.704	15.0815	15.4317	15.2425	Mrps24	0.377896	0.0885759	1.05268	4	4	1	0
Q8C0P0	GWL_MOUSE	Mastl	Serine/threonine-protein kinase greatwall	13163.3	20052.1	19483.9	25079.2	22688	27022.3	24284.5	24669	13.6842	14.2915	14.25	14.6142	14.4696	14.7219	14.5677	14.5904	13.6842	14.2915	14.25	14.6142	14.4696	14.7219	14.5677	14.5904	Mastl	0.377442	0.108184	0.965835	4	4	1	0
P21836	ACES_MOUSE	Ache	Acetylcholinesterase	12174.9		11615.9			9240.24	14494.3	15265.1	13.5716		13.5038			13.1737	13.8232	13.8979	13.5716	12.1943	13.5038	12.2163	12.0989	13.1737	13.8232	13.8979	Ache	0.376923	0.530861	0.275019	3	2	1	0
G3UZI7	G3UZI7_MOUSE	Arhgap6	Rho GTPase activating protein 6			4926.67			6698.62	9771.71				12.2664			12.7096	13.2544		12.2035	12.1943	12.2664	12.2163	12.0989	12.7096	13.2544	12.3248	Arhgap6	0.376805	0.187471	0.727066	2	1	1	0
Q8K4B2	IRAK3_MOUSE	Irak3	Interleukin-1 receptor-associated kinase 3	43926.3	40393.7	48607.3	36422.2	60204.5	45217.1	55510.6	59082.4	15.4228	15.3018	15.5689	15.1525	15.8776	15.4646	15.7605	15.8504	15.4228	15.3018	15.5689	15.1525	15.8776	15.4646	15.7605	15.8504	Irak3	0.376756	0.0270401	1.56799	4	4	1	0
Q8BKI2	TNR6B_MOUSE	Tnrc6b	Trinucleotide repeat-containing gene 6B protein	80780.9	52351.5	67367.4	70269	139353	72686.2	67649.2	83016.3	16.3017	15.6759	16.0398	16.1006	17.0884	16.1494	16.0458	16.3411	16.3017	15.6759	16.0398	16.1006	17.0884	16.1494	16.0458	16.3411	Tnrc6b	0.376659	0.2113	0.675101	4	4	1	0
Q14B01	Q14B01_MOUSE	Rnf113a2	Ring finger protein 113A2	197263	192913	273662	147674	209503	276897	318034	236793	17.5898	17.5576	18.062	17.1721	17.6766	18.079	18.2788	17.8533	17.5898	17.5576	18.062	17.1721	17.6766	18.079	18.2788	17.8533	Rnf113a2	0.376562	0.144645	0.839697	4	4	1	0
Q9CSV6	SFT2C_MOUSE	Sft2d3	Vesicle transport protein SFT2C	12403.6		12391.3	16395.5	19700	13795	9948.03	12391.9	13.5985		13.597	14.001	14.2659	13.7519	13.2802	13.5971	13.5985	12.1943	13.597	14.001	14.2659	13.7519	13.2802	13.5971	Sft2d3	0.376054	0.431698	0.36482	4	3	1	0
D3Z4S3	PTRD1_MOUSE	Ptrhd1	Putative peptidyl-tRNA hydrolase PTRHD1	54782.1	48912.3	55588.2	35656.9	70690.9	45987.3	63475.8	72991.9	15.7414	15.5779	15.7625	15.1219	16.1092	15.4889	15.9539	16.1554	15.7414	15.5779	15.7625	15.1219	16.1092	15.4889	15.9539	16.1554	Ptrhd1	0.37596	0.12783	0.893368	4	4	1	0
Q924T2	RT02_MOUSE	Mrps2	Small ribosomal subunit protein uS2m	42487.6	50116.3	65852.4	47700.8	62108.6	60366.6	82077.3	61499.7	15.3748	15.613	16.0069	15.5417	15.9225	15.8815	16.3247	15.9083	15.3748	15.613	16.0069	15.5417	15.9225	15.8815	16.3247	15.9083	Mrps2	0.375134	0.0700722	1.15445	4	4	1	0
O35453;Q924N9;P21845;Q02844;Q14B25;Q99MS4	HEPS_MOUSE;PRS28_MOUSE;PRS29_MOUSE;PRS48_MOUSE;TRYB1_MOUSE;TRYB2_MOUSE	Hpn;Prss28;Prss29;Prss48;Tpsab1;Tpsb2	Serine protease hepsin			1467.18			8525.1	4670.58	2496.08			10.5188			13.0575	12.1894	11.2854	12.2035	12.1943	10.5188	12.2163	12.0989	13.0575	12.1894	11.2854	Hpn;Prss28;Prss29;Prss48;Tpsab1;Tpsb2	0.374562	0.525456	0.279464	3	1	1	0
B2RX88	CSPP1_MOUSE	Cspp1	Centrosome and spindle pole associated protein 1	27240	33737.4	34628.4	38556.3	35191.5	51242.6	42621.1	45035.1	14.7334	15.0421	15.0797	15.2347	15.1029	15.6451	15.3793	15.4588	14.7334	15.0421	15.0797	15.2347	15.1029	15.6451	15.3793	15.4588	Cspp1	0.374048	0.0511708	1.29098	4	4	1	0
Q9D6U8	F162A_MOUSE	Fam162a	Protein FAM162A	318015	326995	487059	177019	380876	411311	512885	314418	18.2787	18.3189	18.8937	17.4335	18.539	18.6499	18.9683	18.2623	18.2787	18.3189	18.8937	17.4335	18.539	18.6499	18.9683	18.2623	Fam162a	0.373627	0.306441	0.513653	4	4	1	0
Q3UK78	PCGF5_MOUSE	Pcgf5	Polycomb group RING finger protein 5								15251.9								13.8967	12.2035	12.1943	12.2707	12.2163	12.0989	12.1714	12.2107	13.8967	Pcgf5	0.373195	0.423923	0.372713	1	0	0	0
P48760	FOLC_MOUSE	Fpgs	Folylpolyglutamate synthase, mitochondrial	16170.9	19171.1	26043.4	22218.4		20370.8	91254.2	61861.9	13.9811	14.2266	14.6686	14.4395		14.3142	16.4776	15.9168	13.9811	14.2266	14.6686	14.4395	12.0989	14.3142	16.4776	15.9168	Fpgs	0.372909	0.719969	0.142686	3	4	1	0
Q8R1H0	HOP_MOUSE	Hopx	Homeodomain-only protein	126734	73526.9	87275.3	99883.7	188373	125345	90395.1	106823	16.9514	16.166	16.4133	16.608	17.5232	16.9355	16.464	16.7049	16.9514	16.166	16.4133	16.608	17.5232	16.9355	16.464	16.7049	Hopx	0.37223	0.233479	0.631752	4	4	1	0
Q9CWU4	CA052_MOUSE		UPF0690 protein C1orf52 homolog	10525.9	9175.54				12713.7	8616.84	13263.9	13.3617	13.1636				13.6341	13.0729	13.6952	13.3617	13.1636	12.2707	12.2163	12.0989	13.6341	13.0729	13.6952		0.372222	0.462435	0.33495	3	2	1	0
Q62083	PICK1_MOUSE	Pick1	PRKCA-binding protein	11995	7439.11	14301.8	11244.2	11269.2	15732.3	13272.6	17098.1	13.5501	12.8609	13.8039	13.4569	13.4601	13.9414	13.6962	14.0615	13.5501	12.8609	13.8039	13.4569	13.4601	13.9414	13.6962	14.0615	Pick1	0.371847	0.172627	0.762891	4	4	1	0
D3YY91	LLR1_MOUSE	Lrr1	Leucine-rich repeat protein 1	5707.52	10229.8	14373.8	11406.5	5682.83	13256.5	14403.8	24698.4	12.4786	13.3205	13.8112	13.4776	12.4724	13.6944	13.8142	14.5921	12.4786	13.3205	13.8112	13.4776	12.4724	13.6944	13.8142	14.5921	Lrr1	0.371309	0.503463	0.298033	4	4	1	0
P47754	CAZA2_MOUSE	Capza2	F-actin-capping protein subunit alpha-2	1146530	773034	941751	759721	981958	1241900	1401150	1038560	20.1288	19.5602	19.845	19.5351	19.9053	20.2441	20.4182	19.9862	20.1288	19.5602	19.845	19.5351	19.9053	20.2441	20.4182	19.9862	Capza2	0.37116	0.0884693	1.05321	4	4	1	0
Q9D7A8	ARMC1_MOUSE	Armc1	Armadillo repeat-containing protein 1	33882.7	31121	25814.1	27632.4	29265.6	31904.8	44340.2	50765.7	15.0483	14.9256	14.6559	14.7541	14.8369	14.9615	15.4363	15.6316	15.0483	14.9256	14.6559	14.7541	14.8369	14.9615	15.4363	15.6316	Armc1	0.370623	0.125769	0.900427	4	4	1	0
Q8VC51	TCAB1_MOUSE	Wrap53	Telomerase Cajal body protein 1	17924.9	8100.42	18155	15115.7	22677.3	9620.67	22711.4	22457.4	14.1297	12.9838	14.1481	13.8838	14.469	13.2319	14.4711	14.4549	14.1297	12.9838	14.1481	13.8838	14.469	13.2319	14.4711	14.4549	Wrap53	0.370404	0.403908	0.393717	4	4	1	0
A3KGW5	GT253_MOUSE	Cercam	Inactive glycosyltransferase 25 family member 3	14880.7	11545.2	20533	16327.7	13600.8	16507.1	29195.1	24511.7	13.8612	13.495	14.3257	13.995	13.7314	14.0108	14.8334	14.5812	13.8612	13.495	14.3257	13.995	13.7314	14.0108	14.8334	14.5812	Cercam	0.369993	0.272233	0.565059	4	4	1	0
Q9Z329	ITPR2_MOUSE	Itpr2	Inositol 1,4,5-trisphosphate-gated calcium channel ITPR2	18645.9	20740.8	22950.4	21755.1	26473.4	28866.1	24242.8	29035.5	14.1866	14.3402	14.4862	14.4091	14.6923	14.8171	14.5653	14.8255	14.1866	14.3402	14.4862	14.4091	14.6923	14.8171	14.5653	14.8255	Itpr2	0.369523	0.00583144	2.23422	4	4	1	0
Q99M07	COA5_MOUSE	Coa5	Cytochrome c oxidase assembly factor 5	19450.2	24143.5	17895.7	22813.9	29229	24125	28054.2	26988.5	14.2475	14.5593	14.1273	14.4776	14.8351	14.5582	14.7759	14.7201	14.2475	14.5593	14.1273	14.4776	14.8351	14.5582	14.7759	14.7201	Coa5	0.369386	0.0192605	1.71533	4	4	1	0
A0A0R4J205	A0A0R4J205_MOUSE	Trmt10a	tRNA methyltransferase 10 homolog A	23429.4	20157.7	29344.9	16550.9	24270.9	27784.5	42821.3	22101.2	14.516	14.299	14.8408	14.0146	14.5669	14.762	15.386	14.4318	14.516	14.299	14.8408	14.0146	14.5669	14.762	15.386	14.4318	Trmt10a	0.369073	0.226264	0.645384	4	4	1	0
P35276	RAB3D_MOUSE	Rab3d	Ras-related protein Rab-3D	27542.1	23323.3	23163.1	25643.3	32574.2	31247.7	21496.5	48469.1	14.7494	14.5095	14.4995	14.6463	14.9914	14.9315	14.3918	15.5648	14.7494	14.5095	14.4995	14.6463	14.9914	14.9315	14.3918	15.5648	Rab3d	0.368707	0.186274	0.729848	4	4	1	0
Q9Z0U1	ZO2_MOUSE	Tjp2	Tight junction protein ZO-2	11376	13620.9	13143	12981.5	17364.2	16022.4	17027.4	15470.4	13.4737	13.7335	13.682	13.6642	14.0838	13.9678	14.0556	13.9172	13.4737	13.7335	13.682	13.6642	14.0838	13.9678	14.0556	13.9172	Tjp2	0.367752	0.00173642	2.76035	4	4	1	0
Q8VDI9	ALG9_MOUSE	Alg9	Alpha-1,2-mannosyltransferase ALG9	10813.8	8066.69	8393.26	6047.44	9934.25	7278.09	11649.3	14568.1	13.4006	12.9778	13.035	12.5621	13.2782	12.8293	13.508	13.8305	13.4006	12.9778	13.035	12.5621	13.2782	12.8293	13.508	13.8305	Alg9	0.367637	0.224666	0.648463	4	4	1	0
O08901	BUB1_MOUSE	Bub1	Mitotic checkpoint serine/threonine-protein kinase BUB1			25950.6			16080.6	20854.8				14.6635			13.973	14.3481		12.2035	12.1943	14.6635	12.2163	12.0989	13.973	14.3481	12.3248	Bub1	0.366805	0.676923	0.169461	2	1	1	0
O70138	MMP8_MOUSE	Mmp8	Neutrophil collagenase	15799	16439.5		19886	28638.3	13727.9	18712	9575.54	13.9475	14.0049		14.2795	14.8057	13.7448	14.1917	13.2251	13.9475	14.0049	12.2707	14.2795	14.8057	13.7448	14.1917	13.2251	Mmp8	0.366167	0.542503	0.265598	4	3	1	0
Q91Z38	TTC1_MOUSE	Ttc1	Tetratricopeptide repeat protein 1	368645	256316	253462	319337	339290	405938	413858	370153	18.4919	17.9676	17.9514	18.2847	18.3722	18.6309	18.6588	18.4978	18.4919	17.9676	17.9514	18.2847	18.3722	18.6309	18.6588	18.4978	Ttc1	0.366008	0.0467066	1.33062	4	4	1	0
Q3UZ01	RNPC3_MOUSE	Rnpc3	RNA-binding region-containing protein 3	39111.6	38285.8	51424.9	43872.3	43571.7	48846.2	63864.1	68562.4	15.2553	15.2245	15.6502	15.421	15.4111	15.576	15.9627	16.0651	15.2553	15.2245	15.6502	15.421	15.4111	15.576	15.9627	16.0651	Rnpc3	0.365969	0.0930639	1.03122	4	4	1	0
Q8CHY3	DYM_MOUSE	Dym	Dymeclin	69101.7	53264	64272.9	64886	89151.8	83970.3	83537	67696.5	16.0764	15.7009	15.9719	15.9856	16.444	16.3576	16.3501	16.0468	16.0764	15.7009	15.9719	15.9856	16.444	16.3576	16.3501	16.0468	Dym	0.36591	0.0216738	1.66407	4	4	1	0
F7AVL7	F7AVL7_MOUSE	Flna	Filamin, alpha (Fragment)	104718	98309.9	104424	97459.5	125470	135934	139654	121205	16.6761	16.585	16.6721	16.5725	16.937	17.0525	17.0915	16.8871	16.6761	16.585	16.6721	16.5725	16.937	17.0525	17.0915	16.8871	Flna	0.365577	0.0005799	3.23665	4	4	1	0
Q8K2Z8	UB2Q2_MOUSE	Ube2q2	Ubiquitin-conjugating enzyme E2 Q2	2234.22	2804.38	3036.79	3505.45			3652.58	2483.62	11.1256	11.4535	11.5683	11.7754			11.8347	11.2782	11.1256	11.4535	11.5683	11.7754	12.0989	12.1714	11.8347	11.2782	Ube2q2	0.365114	0.185001	0.732827	2	4	1	0
Q9JIY5	HTRA2_MOUSE	Htra2	Serine protease HTRA2, mitochondrial	144830	105025	120662	119023	133073	129950	167008	207162	17.144	16.6804	16.8806	16.8609	17.0219	16.9876	17.3496	17.6604	17.144	16.6804	16.8806	16.8609	17.0219	16.9876	17.3496	17.6604	Htra2	0.363387	0.0964244	1.01581	4	4	1	0
Q9Z207	DIAP3_MOUSE	Diaph3	Protein diaphanous homolog 3	26195.8	26734.1	32480.2	30654.2	36583.9	40096.7	32213	40327.3	14.677	14.7064	14.9873	14.9038	15.1589	15.2912	14.9754	15.2995	14.677	14.7064	14.9873	14.9038	15.1589	15.2912	14.9754	15.2995	Diaph3	0.362608	0.0146748	1.83343	4	4	1	0
O70445	BARD1_MOUSE	Bard1	BRCA1-associated RING domain protein 1	20763.3	19833.7	23628.5	20140.6	19900	28456.7	31029.4	30454.3	14.3417	14.2757	14.5282	14.2978	14.2805	14.7965	14.9213	14.8944	14.3417	14.2757	14.5282	14.2978	14.2805	14.7965	14.9213	14.8944	Bard1	0.362299	0.0649231	1.1876	4	4	1	0
Q8VEA4	MIA40_MOUSE	Chchd4	Mitochondrial intermembrane space import and assembly protein 40	36822.2	50084.9	38135.9	44618.2	41832.6	54395.9	57764.3	65181.6	15.1683	15.6121	15.2189	15.4453	15.3523	15.7312	15.8179	15.9922	15.1683	15.6121	15.2189	15.4453	15.3523	15.7312	15.8179	15.9922	Chchd4	0.362259	0.0769843	1.1136	4	4	1	0
Q810U5	CCD50_MOUSE	Ccdc50	Coiled-coil domain-containing protein 50	82631.5	92084.9	107204	107061	65875.4	135482	225904	118107	16.3344	16.4907	16.71	16.7081	16.0075	17.0477	17.7854	16.8497	16.3344	16.4907	16.71	16.7081	16.0075	17.0477	17.7854	16.8497	Ccdc50	0.361781	0.373955	0.42718	4	4	1	0
Q9D1I2	CAR19_MOUSE	Card19	Caspase recruitment domain-containing protein 19	29061.5	31382	27449.4	28999.5	32765.7	38712.7	33796.1	46168.2	14.8268	14.9376	14.7445	14.8237	14.9999	15.2405	15.0446	15.4946	14.8268	14.9376	14.7445	14.8237	14.9999	15.2405	15.0446	15.4946	Card19	0.361725	0.0232087	1.63435	4	4	1	0
Q9D6I7	DIK1A_MOUSE	Dipk1a	Divergent protein kinase domain 1A	37787	30194.9	18092.1	24208.3	29640.7	34651	32971.3	40162.6	15.2056	14.882	14.1431	14.5632	14.8553	15.0806	15.0089	15.2936	15.2056	14.882	14.1431	14.5632	14.8553	15.0806	15.0089	15.2936	Dipk1a	0.361121	0.190084	0.721055	4	4	1	0
P70351	EZH1_MOUSE	Ezh1	Histone-lysine N-methyltransferase EZH1	4079.74	5453.44	11080.8	6661.15	8262.56	9823.94	6750.93	8147.27	11.9943	12.413	13.4358	12.7016	13.0124	13.2621	12.7209	12.9921	11.9943	12.413	13.4358	12.7016	13.0124	13.2621	12.7209	12.9921	Ezh1	0.360722	0.306862	0.513057	4	4	1	0
Q8BU00	IKZF5_MOUSE	Ikzf5	Zinc finger protein Pegasus	26471.4	14393.5	19317	16546.6	13931.8	26316.6	37738.9	23920	14.6921	13.8131	14.2376	14.0142	13.7661	14.6837	15.2038	14.5459	14.6921	13.8131	14.2376	14.0142	13.7661	14.6837	15.2038	14.5459	Ikzf5	0.360592	0.345201	0.461928	4	4	1	0
Q7TT16	IPMK_MOUSE	Ipmk	Inositol polyphosphate multikinase	33193.1	36335.3	49269.8	24636	36267	55336.9	58370.5	33945.3	15.0186	15.1491	15.5884	14.5885	15.1464	15.756	15.833	15.0509	15.0186	15.1491	15.5884	14.5885	15.1464	15.756	15.833	15.0509	Ipmk	0.360406	0.25839	0.587725	4	4	1	0
Q7TPN9	PRR14_MOUSE	Prr14	Proline-rich protein 14	10843	11265.2	7191.91	9687.74	10437.8	14157.6	11744	13315.6	13.4045	13.4596	12.8122	13.2419	13.3495	13.7893	13.5196	13.7008	13.4045	13.4596	12.8122	13.2419	13.3495	13.7893	13.5196	13.7008	Prr14	0.36028	0.0869086	1.06094	4	4	1	0
Q80UU9	PGRC2_MOUSE	Pgrmc2	Membrane-associated progesterone receptor component 2	153460	85782	92925	101492	123312	146336	161608	115574	17.2275	16.3884	16.5038	16.631	16.912	17.1589	17.3021	16.8185	17.2275	16.3884	16.5038	16.631	16.912	17.1589	17.3021	16.8185	Pgrmc2	0.3602	0.148313	0.828821	4	4	1	0
Q9QYM8	CENPH_MOUSE	Cenph	Centromere protein H	9125.64	5908.74	4255.76	12835.1	8727.11	12254.4	8059.04	9270.58	13.1557	12.5286	12.0552	13.6478	13.0913	13.581	12.9764	13.1784	13.1557	12.5286	12.0552	13.6478	13.0913	13.581	12.9764	13.1784	Cenph	0.359946	0.37216	0.429271	4	4	1	0
Q9DB25	ALG5_MOUSE	Alg5	Dolichyl-phosphate beta-glucosyltransferase	13614.9	16745.8	17396.9	17917.4	22729.4	17238.6	20753.2	23692.1	13.7329	14.0315	14.0865	14.1291	14.4723	14.0734	14.341	14.5321	13.7329	14.0315	14.0865	14.1291	14.4723	14.0734	14.341	14.5321	Alg5	0.359691	0.0380128	1.42007	4	4	1	0
E0CZ69	E0CZ69_MOUSE	Fgd4	FYVE, RhoGEF and PH domain containing 4 (Fragment)			18035.8				13168	19261.8			14.1386				13.6847	14.2335	12.2035	12.1943	14.1386	12.2163	12.0989	12.1714	13.6847	14.2335	Fgd4	0.35893	0.637566	0.195475	2	1	1	0
Q8BKH7	SIN1_MOUSE	Mapkap1	Target of rapamycin complex 2 subunit MAPKAP1	32004.2	27407.4	31501.9	28081.3	25432.4	38925.2	51101.8	41468.3	14.966	14.7423	14.9432	14.7773	14.6344	15.2484	15.6411	15.3397	14.966	14.7423	14.9432	14.7773	14.6344	15.2484	15.6411	15.3397	Mapkap1	0.35872	0.152123	0.817806	4	4	1	0
E9QAN9	E9QAN9_MOUSE	Ifi203	Interferon activated gene 203	115602	138621	125771	144866	123634	193240	160315	206098	16.8188	17.0808	16.9404	17.1444	16.9157	17.56	17.2905	17.653	16.8188	17.0808	16.9404	17.1444	16.9157	17.56	17.2905	17.653	Ifi203	0.35872	0.0942808	1.02558	4	4	1	0
Q9DCN7	RNFT1_MOUSE	Rnft1	E3 ubiquitin-protein ligase RNFT1	21207.6	24144.2	24683.7	17783.4	24828.4	29245.6	32375.1	25803.4	14.3723	14.5594	14.5913	14.1182	14.5997	14.8359	14.9826	14.6553	14.3723	14.5594	14.5913	14.1182	14.5997	14.8359	14.9826	14.6553	Rnft1	0.358077	0.0424807	1.37181	4	4	1	0
Q99K82	SMOX_MOUSE	Smox	Spermine oxidase	3367.16	5012.4	5981.7	3270.99	6329.13		7351.6	4142.3	11.7173	12.2913	12.5463	11.6755	12.6278		12.8438	12.0162	11.7173	12.2913	12.5463	11.6755	12.6278	12.1714	12.8438	12.0162	Smox	0.357187	0.262795	0.580382	3	4	1	0
F6RMJ1	F6RMJ1_MOUSE	Sun1	Sad1 and UNC84 domain containing 1 (Fragment)	59957.5	55662.2	19702.8	60300.4	64672.6	55399.2	47524.6	62689.7	15.8717	15.7644	14.2661	15.8799	15.9809	15.7576	15.5364	15.9359	15.8717	15.7644	14.2661	15.8799	15.9809	15.7576	15.5364	15.9359	Sun1	0.357179	0.413658	0.383359	4	4	1	0
Q80W37	SPN1_MOUSE	Snupn	Snurportin-1	18424.2	15084.3	12789	15641.2	19412	22778.7	20679.9	16352.8	14.1693	13.8808	13.6426	13.9331	14.2447	14.4754	14.3359	13.9973	14.1693	13.8808	13.6426	13.9331	14.2447	14.4754	14.3359	13.9973	Snupn	0.356874	0.0520276	1.28377	4	4	1	0
Q5RKZ7	MOCS1_MOUSE	Mocs1	Molybdenum cofactor biosynthesis protein 1	73630.6	78001.4	77002.5	72018.4	93401.9	101005	99148.9	91484.9	16.168	16.2512	16.2326	16.1361	16.5112	16.6241	16.5973	16.4812	16.168	16.2512	16.2326	16.1361	16.5112	16.6241	16.5973	16.4812	Mocs1	0.356465	0.000177234	3.75145	4	4	1	0
P33609	DPOLA_MOUSE	Pola1	DNA polymerase alpha catalytic subunit	127715	141695	119656	127094	150169	185004	167570	158774	16.9626	17.1124	16.8685	16.9555	17.1962	17.4972	17.3544	17.2766	16.9626	17.1124	16.8685	16.9555	17.1962	17.4972	17.3544	17.2766	Pola1	0.356344	0.00475466	2.32288	4	4	1	0
Q9QXD6	F16P1_MOUSE	Fbp1	Fructose-1,6-bisphosphatase 1	23326.9	22001.6	30309.1	22513.3	26837.9	32116.9	28669.9	37993.6	14.5097	14.4253	14.8875	14.4585	14.712	14.971	14.8072	15.2135	14.5097	14.4253	14.8875	14.4585	14.712	14.971	14.8072	15.2135	Fbp1	0.355692	0.0595459	1.22515	4	4	1	0
P42209	SEPT1_MOUSE	Septin1	Septin-1		5531.77	12891.9	9389.63	5145.05	9917.91	12625.8	13133.3		12.4335	13.6542	13.1969	12.329	13.2758	13.6241	13.6809	12.2035	12.4335	13.6542	13.1969	12.329	13.2758	13.6241	13.6809	Septin1	0.355435	0.468192	0.329576	4	3	1	0
Q9D662	SC23B_MOUSE	Sec23b	Protein transport protein Sec23B	371492	330440	287580	241544	361258	390170	411924	393412	18.503	18.334	18.1336	17.8819	18.4627	18.5737	18.652	18.5857	18.503	18.334	18.1336	17.8819	18.4627	18.5737	18.652	18.5857	Sec23b	0.355396	0.0435073	1.36144	4	4	1	0
Q9Z126	PLF4_MOUSE	Pf4	Platelet factor 4	2298310	1387610	1704690	1598330	1789380	2264890	2502000	2295380	21.1321	20.4042	20.7011	20.6081	20.771	21.111	21.2547	21.1303	21.1321	20.4042	20.7011	20.6081	20.771	21.111	21.2547	21.1303	Pf4	0.355366	0.103218	0.986246	4	4	1	0
P47810	WEE1_MOUSE	Wee1	Wee1-like protein kinase	48960.8	60365.8	47761.3	43172.5	69115.7	71289.2	59018.6	56089.4	15.5793	15.8814	15.5436	15.3978	16.0767	16.1214	15.8489	15.7754	15.5793	15.8814	15.5436	15.3978	16.0767	16.1214	15.8489	15.7754	Wee1	0.35507	0.0362462	1.44074	4	4	1	0
Q6PAL8	DEN5A_MOUSE	Dennd5a	DENN domain-containing protein 5A	22090.8	24087.6	22865.9	25406.8	27978	32301.7	29410.7	31127.2	14.4312	14.556	14.4809	14.6329	14.772	14.9793	14.8441	14.9259	14.4312	14.556	14.4809	14.6329	14.772	14.9793	14.8441	14.9259	Dennd5a	0.355068	0.001384	2.85886	4	4	1	0
F6SAX2	F6SAX2_MOUSE	3110009E18Rik	RIKEN cDNA 3110009E18 gene (Fragment)		18122	50752	19507.2	15652.9	23810.7	36500.2	16624.4		14.1455	15.6312	14.2517	13.9341	14.5393	15.1556	14.021	12.2035	14.1455	15.6312	14.2517	13.9341	14.5393	15.1556	14.021	3110009E18Rik	0.354555	0.656807	0.182562	4	3	1	0
Q9D9V3	ECHD1_MOUSE	Echdc1	Ethylmalonyl-CoA decarboxylase	42711.5	37667.8	26944.3	33518.9	34143.1	44289	60621.9	42353.9	15.3823	15.201	14.7177	15.0327	15.0593	15.4347	15.8876	15.3702	15.3823	15.201	14.7177	15.0327	15.0593	15.4347	15.8876	15.3702	Echdc1	0.354491	0.16089	0.793472	4	4	1	0
P70191	TRAF5_MOUSE	Traf5	TNF receptor-associated factor 5	23880.7	28881	31790.8	28231.3	36501.7	38407.9	37882.9	31141.3	14.5436	14.8178	14.9563	14.785	15.1557	15.2291	15.2093	14.9265	14.5436	14.8178	14.9563	14.785	15.1557	15.2291	15.2093	14.9265	Traf5	0.354468	0.0184202	1.73471	4	4	1	0
B1AVH7	TBD2A_MOUSE	Tbc1d2	TBC1 domain family member 2A	45369.2	38007.6	51639.2	36585.8	48473.3	51316.6	58177.1	60130.5	15.4694	15.214	15.6562	15.159	15.5649	15.6471	15.8282	15.8758	15.4694	15.214	15.6562	15.159	15.5649	15.6471	15.8282	15.8758	Tbc1d2	0.354353	0.0415149	1.3818	4	4	1	0
P21279	GNAQ_MOUSE	Gnaq	Guanine nucleotide-binding protein G(q) subunit alpha	99679.9	94368.5	122737	54959.8	126290	105660	100784	125972	16.605	16.526	16.9052	15.7461	16.9464	16.6891	16.6209	16.9427	16.605	16.526	16.9052	15.7461	16.9464	16.6891	16.6209	16.9427	Gnaq	0.354192	0.223881	0.649983	4	4	1	0
Q8CBY0	GATC_MOUSE	Gatc	Glutamyl-tRNA(Gln) amidotransferase subunit C, mitochondrial	22101	14976.2	26349.6	22010.1	29476.2	23115.4	25093.5	29933.3	14.4318	13.8704	14.6855	14.4259	14.8473	14.4966	14.615	14.8695	14.4318	13.8704	14.6855	14.4259	14.8473	14.4966	14.615	14.8695	Gatc	0.353685	0.118826	0.92509	4	4	1	0
Q60960	IMA5_MOUSE	Kpna1	Importin subunit alpha-5	81742.6	87514.6	118300	87637.8	110231	110103	133739	121571	16.3188	16.4172	16.8521	16.4193	16.7502	16.7485	17.0291	16.8914	16.3188	16.4172	16.8521	16.4193	16.7502	16.7485	17.0291	16.8914	Kpna1	0.352943	0.0416221	1.38068	4	4	1	0
Q78XF5	OSTC_MOUSE	Ostc	Oligosaccharyltransferase complex subunit OSTC	6911.02	7156.78	7223.11	6959.86	13196.4	8931.41	7752.69	7239.54	12.7547	12.8051	12.8184	12.7648	13.6879	13.1247	12.9205	12.8217	12.7547	12.8051	12.8184	12.7648	13.6879	13.1247	12.9205	12.8217	Ostc	0.352917	0.119123	0.924004	4	4	1	0
Q9D1M1	Q9D1M1_MOUSE	Polr1d	Polymerase (RNA) I polypeptide D	20576.4	21040.6	14423.1	13800.9	21894.5	25471.2	22154.5	18552	14.3287	14.3609	13.8161	13.7525	14.4183	14.6366	14.4353	14.1793	14.3287	14.3609	13.8161	13.7525	14.4183	14.6366	14.4353	14.1793	Polr1d	0.352825	0.108859	0.963136	4	4	1	0
Q9DBW3	NATD1_MOUSE	Natd1	Protein NATD1	20639.3	15879.8		19933.2	22567.3	18431.1	13949.9	14793.1	14.3331	13.9549		14.2829	14.4619	14.1699	13.768	13.8526	14.3331	13.9549	12.2707	14.2829	14.4619	14.1699	13.768	13.8526	Natd1	0.352693	0.516914	0.286582	4	3	1	0
Q9CRA8	EXOS5_MOUSE	Exosc5	Exosome complex component RRP46	70550.4	50709.7	54121.4	56202.3	68589.8	75020.4	72882.8	77055.1	16.1064	15.63	15.7239	15.7783	16.0657	16.195	16.1533	16.2336	16.1064	15.63	15.7239	15.7783	16.0657	16.195	16.1533	16.2336	Exosc5	0.35225	0.0182944	1.73768	4	4	1	0
Q6ZQB6	VIP2_MOUSE	Ppip5k2	Inositol hexakisphosphate and diphosphoinositol-pentakisphosphate kinase 2	51286.9	42542.5	41414.8	42358	61329.5	58971.9	55054.1	51004.8	15.6463	15.3766	15.3379	15.3703	15.9043	15.8477	15.7486	15.6383	15.6463	15.3766	15.3379	15.3703	15.9043	15.8477	15.7486	15.6383	Ppip5k2	0.351954	0.0089129	2.04998	4	4	1	0
A0A668KL68	A0A668KL68_MOUSE	Nkrf	NF-kappaB repressing factor	28160.6	30946	26951	23392.5	40368.6	42725.1	35441.1	23842	14.7814	14.9175	14.7181	14.5138	15.3009	15.3828	15.1131	14.5412	14.7814	14.9175	14.7181	14.5138	15.3009	15.3828	15.1131	14.5412	Nkrf	0.351858	0.140806	0.851378	4	4	1	0
Q9D6J6	NDUV2_MOUSE	Ndufv2	NADH dehydrogenase [ubiquinone] flavoprotein 2, mitochondrial	145406	113655	118873	114351	149303	182666	140387	155585	17.1497	16.7943	16.8591	16.8031	17.1879	17.4788	17.099	17.2473	17.1497	16.7943	16.8591	16.8031	17.1879	17.4788	17.099	17.2473	Ndufv2	0.351731	0.0236194	1.62673	4	4	1	0
P18242	CATD_MOUSE	Ctsd	Cathepsin D	705636	598394	539445	610569	746728	810085	800514	761330	19.4286	19.1907	19.0411	19.2198	19.5102	19.6277	19.6106	19.5382	19.4286	19.1907	19.0411	19.2198	19.5102	19.6277	19.6106	19.5382	Ctsd	0.351614	0.00597316	2.2238	4	4	1	0
Q9DBC7	KAP0_MOUSE	Prkar1a	cAMP-dependent protein kinase type I-alpha regulatory subunit	388244	210178	159241	266580	404233	286796	219478	360430	18.5666	17.6813	17.2809	18.0242	18.6248	18.1297	17.7437	18.4594	18.5666	17.6813	17.2809	18.0242	18.6248	18.1297	17.7437	18.4594	Prkar1a	0.351163	0.334639	0.475423	4	4	1	0
Q66JY6	ARG39_MOUSE	Arhgef39	Rho guanine nucleotide exchange factor 39	8472.25	8942.23	11269.3	6470.97	9193	13734.2	8317.1	13928.4	13.0485	13.1264	13.4601	12.6598	13.1663	13.7455	13.0219	13.7657	13.0485	13.1264	13.4601	12.6598	13.1663	13.7455	13.0219	13.7657	Arhgef39	0.351147	0.215598	0.666355	4	4	1	0
O09039	SH2B3_MOUSE	Sh2b3	SH2B adapter protein 3		8158.71	10674.8	6937.89	9744.55	10386	9018.91	8264.76		12.9941	13.3819	12.7603	13.2504	13.3424	13.1387	13.0128	12.2035	12.9941	13.3819	12.7603	13.2504	13.3424	13.1387	13.0128	Sh2b3	0.351094	0.220128	0.657325	4	3	1	0
Q8BGS7	CEPT1_MOUSE	Cept1	Choline/ethanolaminephosphotransferase 1	9582.65	13885.1	17345	16045.8	16490.4	15715.7	23773.3	15907.2	13.2262	13.7612	14.0822	13.9699	14.0093	13.9399	14.5371	13.9574	13.2262	13.7612	14.0822	13.9699	14.0093	13.9399	14.5371	13.9574	Cept1	0.351026	0.190072	0.721082	4	4	1	0
Q6PCS8	Q6PCS8_MOUSE	Zbtb40	Zinc finger and BTB domain containing 40	5057.57	3694.2	4680.02			5841.38	8375.8		12.3042	11.851	12.1923			12.5121	13.032		12.3042	11.851	12.1923	12.2163	12.0989	12.5121	13.032	12.3248	Zbtb40	0.35099	0.165586	0.780977	2	3	1	0
Q9CQ65	MTAP_MOUSE	Mtap	S-methyl-5'-thioadenosine phosphorylase	150562	163152	176706	179075	195722	218155	242913	198271	17.2	17.3159	17.431	17.4502	17.5784	17.735	17.8901	17.5971	17.2	17.3159	17.431	17.4502	17.5784	17.735	17.8901	17.5971	Mtap	0.350896	0.00909637	2.04113	4	4	1	0
O08648	M3K4_MOUSE	Map3k4	Mitogen-activated protein kinase kinase kinase 4	24229.6	30403.1	46219	20430.7	42943.9	29316.1	48459.5	30118.9	14.5645	14.8919	15.4962	14.3185	15.3902	14.8394	15.5645	14.8784	14.5645	14.8919	15.4962	14.3185	15.3902	14.8394	15.5645	14.8784	Map3k4	0.350345	0.306184	0.514018	4	4	1	0
Q7TME2	SPAG5_MOUSE	Spag5	Sperm-associated antigen 5	40820.8	32076.2	31807.2	44457	40010.2	49212.9	51706.9	48022.1	15.317	14.9692	14.9571	15.4401	15.2881	15.5867	15.6581	15.5514	15.317	14.9692	14.9571	15.4401	15.2881	15.5867	15.6581	15.5514	Spag5	0.350222	0.054315	1.26508	4	4	1	0
Q9DBN5	LONP2_MOUSE	Lonp2	Lon protease homolog 2, peroxisomal	30212.5	40420.1	36391.9	27318.4	35065.3	48462.1	41418.3	45529.1	14.8829	15.3028	15.1513	14.7376	15.0978	15.5646	15.338	15.4745	14.8829	15.3028	15.1513	14.7376	15.0978	15.5646	15.338	15.4745	Lonp2	0.350062	0.075654	1.12117	4	4	1	0
Q9JJI8	RL38_MOUSE	Rpl38	Large ribosomal subunit protein eL38	176855	143562	177122	162303	158545	197828	173794	353300	17.4322	17.1313	17.4344	17.3083	17.2745	17.5939	17.407	18.4305	17.4322	17.1313	17.4344	17.3083	17.2745	17.5939	17.407	18.4305	Rpl38	0.349934	0.241626	0.616857	4	4	1	0
Q8VIJ8	NPRL3_MOUSE	Nprl3	GATOR1 complex protein NPRL3	9315.29	5422.26	6461.51	5165.65	6660.87	5258.65	11259.1	11279.3	13.1854	12.4047	12.6577	12.3347	12.7015	12.3605	13.4588	13.4614	13.1854	12.4047	12.6577	12.3347	12.7015	12.3605	13.4588	13.4614	Nprl3	0.349928	0.339902	0.468646	4	4	1	0
P11404	FABPH_MOUSE	Fabp3	Fatty acid-binding protein, heart	41410	10290.7	14489.7	10545.5	23961.7	7726.77	72395.6	12817.4	15.3377	13.3291	13.8227	13.3643	14.5484	12.9156	16.1436	13.6458	15.3377	13.3291	13.8227	13.3643	14.5484	12.9156	16.1436	13.6458	Fabp3	0.349924	0.691596	0.160147	4	4	1	0
P22437	PGH1_MOUSE	Ptgs1	Prostaglandin G/H synthase 1	176326	152659	130416	137775	159562	172658	219649	210879	17.4279	17.22	16.9928	17.072	17.2838	17.3976	17.7448	17.6861	17.4279	17.22	16.9928	17.072	17.2838	17.3976	17.7448	17.6861	Ptgs1	0.349914	0.0544407	1.26408	4	4	1	0
A6PWS5	A6PWS5_MOUSE	Gsn	Gelsolin (Fragment)	151197	152451	124183	159654	181633	183187	168162	215386	17.2061	17.218	16.9221	17.2846	17.4707	17.483	17.3595	17.7166	17.2061	17.218	16.9221	17.2846	17.4707	17.483	17.3595	17.7166	Gsn	0.349732	0.0190781	1.71947	4	4	1	0
O70325	GPX4_MOUSE	Gpx4	Phospholipid hydroperoxide glutathione peroxidase GPX4	248154	241164	214148	255364	261927	311822	307389	343598	17.9209	17.8797	17.7082	17.9622	17.9988	18.2504	18.2297	18.3904	17.9209	17.8797	17.7082	17.9622	17.9988	18.2504	18.2297	18.3904	Gpx4	0.349565	0.0120517	1.91895	4	4	1	0
Q64520	KGUA_MOUSE	Guk1	Guanylate kinase	14962.1	14247.5	15603	14033.5	15809.9	18631.8	17406	23995.3	13.869	13.7984	13.9295	13.7766	13.9485	14.1855	14.0873	14.5505	13.869	13.7984	13.9295	13.7766	13.9485	14.1855	14.0873	14.5505	Guk1	0.349553	0.0394991	1.40341	4	4	1	0
Q8VEM1	GOLI_MOUSE	Rnf130	E3 ubiquitin-protein ligase RNF130	9592.17		23700.6	32734.6	27013.2	33397.6	19822.6		13.2276		14.5326	14.9985	14.7214	15.0275	14.2749		13.2276	12.1943	14.5326	14.9985	14.7214	15.0275	14.2749	12.3248	Rnf130	0.348846	0.705488	0.15151	3	3	1	0
Q9JLV2	TP4AP_MOUSE	Trpc4ap	Short transient receptor potential channel 4-associated protein	11849.2	11237.2	11350.6	15258	16014.4	14486.1	13056.6	19998.3	13.5325	13.456	13.4705	13.8973	13.9671	13.8224	13.6725	14.2876	13.5325	13.456	13.4705	13.8973	13.9671	13.8224	13.6725	14.2876	Trpc4ap	0.348322	0.0828619	1.08165	4	4	1	0
E9PZP8	E9PZP8_MOUSE	Herc1	HECT and RLD domain containing E3 ubiquitin protein ligase family member 1	20552.2	21212	20111.9	19332.2	22433.5	27806.8	25464.8	28025.6	14.327	14.3726	14.2958	14.2387	14.4534	14.7632	14.6362	14.7745	14.327	14.3726	14.2958	14.2387	14.4534	14.7632	14.6362	14.7745	Herc1	0.348278	0.00475193	2.32313	4	4	1	0
P97808	FXYD5_MOUSE	Fxyd5	FXYD domain-containing ion transport regulator 5	59463.1	64205.3	43369.5	47843.7	88641.7	71616.7	55237.2	59196.5	15.8597	15.9704	15.4044	15.546	16.4357	16.128	15.7534	15.8532	15.8597	15.9704	15.4044	15.546	16.4357	16.128	15.7534	15.8532	Fxyd5	0.347434	0.136665	0.864343	4	4	1	0
P62878	RBX1_MOUSE	Rbx1	E3 ubiquitin-protein ligase RBX1	60717.5	36940.6	14017.4	60812	54403.3	50484.4	40058.1	45484.9	15.8898	15.1729	13.7749	15.8921	15.7314	15.6236	15.2898	15.4731	15.8898	15.1729	13.7749	15.8921	15.7314	15.6236	15.2898	15.4731	Rbx1	0.34703	0.519927	0.284058	4	4	1	0
Q8VDF2	UHRF1_MOUSE	Uhrf1	E3 ubiquitin-protein ligase UHRF1	253267	247212	237285	260406	282966	333087	308880	347817	17.9503	17.9154	17.8563	17.9904	18.1103	18.3455	18.2367	18.408	17.9503	17.9154	17.8563	17.9904	18.1103	18.3455	18.2367	18.408	Uhrf1	0.347028	0.00279716	2.55328	4	4	1	0
P70236	MP2K6_MOUSE	Map2k6	Dual specificity mitogen-activated protein kinase kinase 6	13127.5	15327.4	25747.7	14816.7	12136	25084.4	27216.7	24228.8	13.6803	13.9038	14.6522	13.8549	13.567	14.6145	14.7322	14.5644	13.6803	13.9038	14.6522	13.8549	13.567	14.6145	14.7322	14.5644	Map2k6	0.346731	0.35384	0.451193	4	4	1	0
Q6AXC6	DDX11_MOUSE	Ddx11	ATP-dependent DNA helicase DDX11	57697.4	44291.3	57648	38399.5	56901	63545	78770.5	51827.6	15.8162	15.4347	15.815	15.2288	15.7962	15.9555	16.2654	15.6614	15.8162	15.4347	15.815	15.2288	15.7962	15.9555	16.2654	15.6614	Ddx11	0.34593	0.12701	0.896162	4	4	1	0
Q99LI7	CSTF3_MOUSE	Cstf3	Cleavage stimulation factor subunit 3	82229	102447	122331	98902.5	89527.5	123015	183758	131310	16.3274	16.6445	16.9004	16.5937	16.45	16.9085	17.4874	17.0026	16.3274	16.6445	16.9004	16.5937	16.45	16.9085	17.4874	17.0026	Cstf3	0.345639	0.204659	0.688968	4	4	1	0
Q61024	ASNS_MOUSE	Asns	Asparagine synthetase [glutamine-hydrolyzing]	48385.3	38172.1	43747.3	38774.8	53969.8	41032.6	53064.7	69477.9	15.5623	15.2202	15.4169	15.2428	15.7199	15.3245	15.6955	16.0843	15.5623	15.2202	15.4169	15.2428	15.7199	15.3245	15.6955	16.0843	Asns	0.345457	0.0954062	1.02042	4	4	1	0
O35347	DGCR6_MOUSE	Dgcr6	Protein DGCR6	5698.08	11617	14677.7		8887.95	9076.42	10926.5	13651.8	12.4763	13.5039	13.8413		13.1176	13.1479	13.4155	13.7368	12.4763	13.5039	13.8413	12.2163	13.1176	13.1479	13.4155	13.7368	Dgcr6	0.345007	0.44093	0.355631	4	3	1	0
A2AQR4	A2AQR4_MOUSE	Zfp64	Zinc finger protein 64	4769.26	2233.93		2746.15	3110.56	5257.04	3897.58	5897.89	12.2195	11.1254		11.4232	11.603	12.36	11.9284	12.526	12.2195	11.1254	12.2707	11.4232	11.603	12.36	11.9284	12.526	Zfp64	0.344623	0.369368	0.432541	4	3	1	0
Q8R1S0	COQ6_MOUSE	Coq6	Ubiquinone biosynthesis monooxygenase COQ6, mitochondrial	67537.9	54893.8	41305.5	67892.4	66327.9	75727.5	86260.9	62358.2	16.0434	15.7444	15.334	16.051	16.0173	16.2085	16.3964	15.9283	16.0434	15.7444	15.334	16.051	16.0173	16.2085	16.3964	15.9283	Coq6	0.344449	0.133288	0.87521	4	4	1	0
Q8VEH3	ARL8A_MOUSE	Arl8a	ADP-ribosylation factor-like protein 8A	21332.9	15425.8	13347.9	19923.1	20603	18606	20167.1	29402.2	14.3808	13.9131	13.7043	14.2822	14.3306	14.1835	14.2997	14.8436	14.3808	13.9131	13.7043	14.2822	14.3306	14.1835	14.2997	14.8436	Arl8a	0.344267	0.161394	0.792112	4	4	1	0
A2A5Z6	SMUF2_MOUSE	Smurf2	E3 ubiquitin-protein ligase SMURF2	8755.24	10643.8	11534.2	8711.36	13873.1	11881.1	14274.8	10333.1	13.0959	13.3777	13.4936	13.0887	13.76	13.5364	13.8012	13.335	13.0959	13.3777	13.4936	13.0887	13.76	13.5364	13.8012	13.335	Smurf2	0.344146	0.0596942	1.22407	4	4	1	0
Q8QZR8	CCNQ_MOUSE	Ccnq	Cyclin-Q	19276.5	25047.6	15225.6	26769.6	25490.5	23329.3	27065.6	31742.9	14.2346	14.6124	13.8942	14.7083	14.6377	14.5099	14.7242	14.9541	14.2346	14.6124	13.8942	14.7083	14.6377	14.5099	14.7242	14.9541	Ccnq	0.344097	0.150314	0.823	4	4	1	0
Q61122	NAB1_MOUSE	Nab1	NGFI-A-binding protein 1	44584.8	40147.9	52142.4	45883.8	53522.5	55557.4	66988.1	55736.2	15.4443	15.293	15.6702	15.4857	15.7079	15.7617	16.0316	15.7663	15.4443	15.293	15.6702	15.4857	15.7079	15.7617	16.0316	15.7663	Nab1	0.343581	0.0179288	1.74645	4	4	1	0
P60330	ESPL1_MOUSE	Espl1	Separin	23270.4	18784.4	21173.1	23856.4	24968.1	26166.2	27395.1	31979	14.5062	14.1972	14.3699	14.5421	14.6078	14.6754	14.7416	14.9648	14.5062	14.1972	14.3699	14.5421	14.6078	14.6754	14.7416	14.9648	Espl1	0.343548	0.0205593	1.68699	4	4	1	0
Q9WUE3	C56D2_MOUSE	Cyb561d2	Transmembrane reductase CYB561D2	37354.2	30543.7	32414.8	28212.4	49780.3	40358.9	43520.5	30810.8	15.189	14.8986	14.9844	14.784	15.6033	15.3006	15.4094	14.9111	15.189	14.8986	14.9844	14.784	15.6033	15.3006	15.4094	14.9111	Cyb561d2	0.342116	0.0893497	1.04891	4	4	1	0
Q9DCE9	IRGM3_MOUSE	Igtp	Immunity-related GTPase family M protein 3	85346.3	36016.4	43757.8	46970.4	60116.3	58369.4	63360.2	73368.3	16.381	15.1364	15.4173	15.5195	15.8755	15.8329	15.9513	16.1629	16.381	15.1364	15.4173	15.5195	15.8755	15.8329	15.9513	16.1629	Igtp	0.342107	0.264795	0.577091	4	4	1	0
Q8VDU0	GPSM2_MOUSE	Gpsm2	G-protein-signaling modulator 2	16910.6	13761.5	15580.7	19603.3	17058.1	24196.4	18565	23942.9	14.0456	13.7484	13.9275	14.2588	14.0582	14.5625	14.1803	14.5473	14.0456	13.7484	13.9275	14.2588	14.0582	14.5625	14.1803	14.5473	Gpsm2	0.342003	0.0865906	1.06253	4	4	1	0
P97822	AN32E_MOUSE	Anp32e	Acidic leucine-rich nuclear phosphoprotein 32 family member E	386622	397918	468109	413804	400879	425268	651682	692296	18.5606	18.6021	18.8365	18.6586	18.6128	18.698	19.3138	19.401	18.5606	18.6021	18.8365	18.6586	18.6128	18.698	19.3138	19.401	Anp32e	0.341977	0.159543	0.797123	4	4	1	0
Q8BHB0	NOD1_MOUSE	Nod1	Nucleotide-binding oligomerization domain-containing protein 1	21178.3	16739	13932.7	22061.9	17016.5	22898	27297.5	26413.5	14.3703	14.0309	13.7662	14.4293	14.0546	14.4829	14.7365	14.689	14.3703	14.0309	13.7662	14.4293	14.0546	14.4829	14.7365	14.689	Nod1	0.341592	0.170587	0.768053	4	4	1	0
E9Q236	MRP4_MOUSE	Abcc4	ATP-binding cassette sub-family C member 4	137917	142477	145078	148542	162548	153649	196910	221941	17.0734	17.1204	17.1465	17.1805	17.3105	17.2293	17.5872	17.7598	17.0734	17.1204	17.1465	17.1805	17.3105	17.2293	17.5872	17.7598	Abcc4	0.341497	0.0340016	1.4685	4	4	1	0
Q99J78	DEFI8_MOUSE	Def8	Differentially expressed in FDCP 8	41884.2	16621.3	19898.4	26373.3	26346.5	35702.8	31592.6	31672.6	15.3541	14.0207	14.2804	14.6868	14.6853	15.1237	14.9473	14.9509	15.3541	14.0207	14.2804	14.6868	14.6853	15.1237	14.9473	14.9509	Def8	0.341325	0.304877	0.515875	4	4	1	0
A2CG63	ARI4B_MOUSE	Arid4b	AT-rich interactive domain-containing protein 4B	55652.7	56040.8	50757	55091.3	63344.7	73912.2	66413.3	72182.1	15.7642	15.7742	15.6313	15.7495	15.9509	16.1735	16.0192	16.1394	15.7642	15.7742	15.6313	15.7495	15.9509	16.1735	16.0192	16.1394	Arid4b	0.340947	0.00146556	2.834	4	4	1	0
O88708	ORC4_MOUSE	Orc4	Origin recognition complex subunit 4	37590.3	32801	24994.4	29079.5	32453.4	38977.5	41010.9	44452.8	15.1981	15.0015	14.6093	14.8277	14.9861	15.2504	15.3237	15.44	15.1981	15.0015	14.6093	14.8277	14.9861	15.2504	15.3237	15.44	Orc4	0.340896	0.0743779	1.12856	4	4	1	0
Q9Z0R9	FADS2_MOUSE	Fads2	Acyl-CoA 6-desaturase	23499.6	13572	38012.5	26650.9	20082.8	27686	46160	32365.9	14.5203	13.7283	15.2142	14.7019	14.2937	14.7569	15.4944	14.9822	14.5203	13.7283	15.2142	14.7019	14.2937	14.7569	15.4944	14.9822	Fads2	0.340577	0.423365	0.373285	4	4	1	0
Q99KR3	LACB2_MOUSE	Lactb2	Endoribonuclease LACTB2	201616	184258	254461	170564	194513	218590	336949	288960	17.6213	17.4914	17.9571	17.38	17.5695	17.7379	18.3622	18.1405	17.6213	17.4914	17.9571	17.38	17.5695	17.7379	18.3622	18.1405	Lactb2	0.3401	0.173933	0.759619	4	4	1	0
Q9CQU5	ZWINT_MOUSE	Zwint	ZW10 interactor	39738	45200.2	39268.7	42623.9	44950.3	55818.7	53793.3	57159.6	15.2782	15.464	15.2611	15.3794	15.456	15.7685	15.7151	15.8027	15.2782	15.464	15.2611	15.3794	15.456	15.7685	15.7151	15.8027	Zwint	0.339903	0.0100288	1.99875	4	4	1	0
P97372	PSME2_MOUSE	Psme2	Proteasome activator complex subunit 2	890398	943868	1100860	766388	1196870	1093200	1161730	1196930	19.7641	19.8482	20.0702	19.5477	20.1908	20.0601	20.1478	20.1909	19.7641	19.8482	20.0702	19.5477	20.1908	20.0601	20.1478	20.1909	Psme2	0.33987	0.0232345	1.63387	4	4	1	0
Q99KI3	EMC3_MOUSE	Emc3	ER membrane protein complex subunit 3	38489.9	47637.8	37643.2	37995.4	47081.9	44859.3	44164.6	72121	15.2322	15.5398	15.2001	15.2135	15.5229	15.4531	15.4306	16.1381	15.2322	15.5398	15.2001	15.2135	15.5229	15.4531	15.4306	16.1381	Emc3	0.339772	0.119282	0.923426	4	4	1	0
Q8CI43	MYL6B_MOUSE	Myl6b	Myosin light chain 6B	5966.17	7683.51	4265.63	5760.46	8823.88	6287.15	5532.59	9405.12	12.5426	12.9075	12.0585	12.492	13.1072	12.6182	12.4337	13.1992	12.5426	12.9075	12.0585	12.492	13.1072	12.6182	12.4337	13.1992	Myl6b	0.339427	0.230777	0.636808	4	4	1	0
Q9WUJ8	ORC6_MOUSE	Orc6	Origin recognition complex subunit 6	25646.1	21787.6	12475.3	22477.2	30391.9	25305.6	17459.3	29876.9	14.6465	14.4112	13.6068	14.4562	14.8914	14.6272	14.0917	14.8667	14.6465	14.4112	13.6068	14.4562	14.8914	14.6272	14.0917	14.8667	Orc6	0.339097	0.295183	0.529909	4	4	1	0
P97477	AURKA_MOUSE	Aurka	Aurora kinase A	54931.7	65664.9	80251.4	67156.6	66664.9	92318.6	92804.1	87126.1	15.7454	16.0028	16.2922	16.0352	16.0246	16.4943	16.5019	16.4108	15.7454	16.0028	16.2922	16.0352	16.0246	16.4943	16.5019	16.4108	Aurka	0.339006	0.0769502	1.11379	4	4	1	0
Q5Y5T1	ZDH20_MOUSE	Zdhhc20	Palmitoyltransferase ZDHHC20	12397.5	14789.8	20730.7	15272.3	18037.8	18919.9	21031.5	20702.3	13.5978	13.8523	14.3395	13.8986	14.1387	14.2076	14.3603	14.3375	13.5978	13.8523	14.3395	13.8986	14.1387	14.2076	14.3603	14.3375	Zdhhc20	0.338983	0.0825879	1.08308	4	4	1	0
Q8VHL0	UT1_MOUSE	Slc14a1	Urea transporter 1	51136.8	30022.9	17346.3	39315.1	22389.9	33975.3	45481.2	77385.4	15.6421	14.8738	14.0823	15.2628	14.4506	15.0522	15.473	16.2398	15.6421	14.8738	14.0823	15.2628	14.4506	15.0522	15.473	16.2398	Slc14a1	0.338632	0.525503	0.279425	4	4	1	0
Q8CAY6	THIC_MOUSE	Acat2	Acetyl-CoA acetyltransferase, cytosolic	307797	211409	282712	202420	335392	274612	360104	287024	18.2316	17.6897	18.109	17.627	18.3555	18.067	18.4581	18.1308	18.2316	17.6897	18.109	17.627	18.3555	18.067	18.4581	18.1308	Acat2	0.338532	0.103486	0.98512	4	4	1	0
Q9QZD8	DIC_MOUSE	Slc25a10	Mitochondrial dicarboxylate carrier	91663.3	67959.8	70378.5	64795.5	98554.8	113462	66046.7	98288.3	16.4841	16.0524	16.1028	15.9836	16.5886	16.7918	16.0112	16.5847	16.4841	16.0524	16.1028	15.9836	16.5886	16.7918	16.0112	16.5847	Slc25a10	0.338379	0.145012	0.838596	4	4	1	0
Q8VBU8	BANP_MOUSE	Banp	Protein BANP	8740.75	8119.67	8423.7	8369	13117.4	7787.55	7839.55	15958.7	13.0935	12.9872	13.0402	13.0308	13.6792	12.927	12.9366	13.9621	13.0935	12.9872	13.0402	13.0308	13.6792	12.927	12.9366	13.9621	Banp	0.338234	0.247291	0.606791	4	4	1	0
Q8CBC4	CNST_MOUSE	Cnst	Consortin	8869.58	5704.45		9954.87	8224.47	11619.9	7691.81	8635.97	13.1147	12.4779		13.2812	13.0057	13.5043	12.9091	13.0761	13.1147	12.4779	12.2707	13.2812	13.0057	13.5043	12.9091	13.0761	Cnst	0.337705	0.268538	0.570993	4	3	1	0
Q9QYY0	GAB1_MOUSE	Gab1	GRB2-associated-binding protein 1	6689.23	5414.27		8469.61	10476.3	8640.76	6430.27	6629.17	12.7076	12.4026		13.0481	13.3548	13.0769	12.6507	12.6946	12.7076	12.4026	12.2707	13.0481	13.3548	13.0769	12.6507	12.6946	Gab1	0.337017	0.210715	0.676304	4	3	1	0
Q68FD7	FNIP1_MOUSE	Fnip1	Folliculin-interacting protein 1	12301.3	11846.6	17236.9	11169.1	9839.98	15859.6	22451	20362.2	13.5865	13.5322	14.0732	13.4472	13.2644	13.9531	14.4545	14.3136	13.5865	13.5322	14.0732	13.4472	13.2644	13.9531	14.4545	14.3136	Fnip1	0.336615	0.305921	0.51439	4	4	1	0
Q6A037	N4BP1_MOUSE	N4bp1	NEDD4-binding protein 1	69617.9	67900.4	56267.1	59054.4	68249.1	86356.2	85087	79642.1	16.0872	16.0511	15.78	15.8498	16.0585	16.398	16.3767	16.2812	16.0872	16.0511	15.78	15.8498	16.0585	16.398	16.3767	16.2812	N4bp1	0.336591	0.0206987	1.68406	4	4	1	0
Q922Q2	RIOK1_MOUSE	Riok1	Serine/threonine-protein kinase RIO1	72186.2	69866.9	65842.9	54882.1	80682.2	80226	82364.1	86827.6	16.1394	16.0923	16.0067	15.744	16.3	16.2918	16.3297	16.4059	16.1394	16.0923	16.0067	15.744	16.3	16.2918	16.3297	16.4059	Riok1	0.336198	0.0106473	1.97276	4	4	1	0
Q32P12	HROB_MOUSE	Hrob	Homologous recombination OB-fold protein	21036.9	22061.6	19164.1	25413.7	25315.6	30132	26139.5	28768.3	14.3606	14.4292	14.2261	14.6333	14.6277	14.879	14.6739	14.8122	14.3606	14.4292	14.2261	14.6333	14.6277	14.879	14.6739	14.8122	Hrob	0.335891	0.0173341	1.7611	4	4	1	0
G5E870	TRIPC_MOUSE	Trip12	E3 ubiquitin-protein ligase TRIP12	134107	126770	127178	146249	143018	152184	187127	196793	17.033	16.9519	16.9565	17.1581	17.1258	17.2155	17.5137	17.5863	17.033	16.9519	16.9565	17.1581	17.1258	17.2155	17.5137	17.5863	Trip12	0.335459	0.0332261	1.47852	4	4	1	0
Q6PFD7	NAIF1_MOUSE	Naif1	Nuclear apoptosis-inducing factor 1	35119.3	33255.5	37737.6	35227.6	46255.2	47657.5	49350.8	36132.6	15.1	15.0213	15.2037	15.1044	15.4973	15.5404	15.5908	15.141	15.1	15.0213	15.2037	15.1044	15.4973	15.5404	15.5908	15.141	Naif1	0.335032	0.0217355	1.66283	4	4	1	0
P97930	KTHY_MOUSE	Dtymk	Thymidylate kinase	239871	207587	272657	210987	224678	271877	349401	339691	17.8719	17.6634	18.0567	17.6868	17.7775	18.0526	18.4145	18.3739	17.8719	17.6634	18.0567	17.6868	17.7775	18.0526	18.4145	18.3739	Dtymk	0.334926	0.104811	0.979595	4	4	1	0
Q3UDK1	TRAD1_MOUSE	Trafd1	TRAF-type zinc finger domain-containing protein 1	121266	123468	148023	108536	115728	175140	197178	152319	16.8878	16.9138	17.1755	16.7278	16.8204	17.4181	17.5891	17.2167	16.8878	16.9138	17.1755	16.7278	16.8204	17.4181	17.5891	17.2167	Trafd1	0.334883	0.127861	0.893261	4	4	1	0
Q8BR63	F177A_MOUSE	Fam177a1	Protein FAM177A1	36573.3	20809.1	23714	24529.9	32900	29993.2	36186	31364.3	15.1585	14.3449	14.5335	14.5823	15.0058	14.8723	15.1431	14.9368	15.1585	14.3449	14.5335	14.5823	15.0058	14.8723	15.1431	14.9368	Fam177a1	0.334748	0.120145	0.920293	4	4	1	0
B1AUF2;B1AUF1	B1AUF1_MOUSE;B1AUF2_MOUSE	Ski	Ski oncogene	24758.3	28626.3	23279.3	30690.9	32814.6	34994.8	36517.5	30543.2	14.5956	14.8051	14.5068	14.9055	15.0021	15.0949	15.1563	14.8986	14.5956	14.8051	14.5068	14.9055	15.0021	15.0949	15.1563	14.8986	Ski	0.334701	0.0209812	1.67817	4	4	1	0
Q3TQI7	TLS1_MOUSE		Splicing factor C9orf78 homolog	96372.5	85294.8	74397.1	85884.9	109404	117862	128134	80144.2	16.5563	16.3802	16.183	16.3901	16.7393	16.8467	16.9673	16.2903	16.5563	16.3802	16.183	16.3901	16.7393	16.8467	16.9673	16.2903		0.333517	0.0917295	1.03749	4	4	1	0
P15533	TR30A_MOUSE	Trim30a	Tripartite motif-containing protein 30A	47918.2	45047.9	52439	37873.6	32618.7	60597.1	79152.8	69060.1	15.5483	15.4592	15.6784	15.2089	14.9934	15.887	16.2724	16.0756	15.5483	15.4592	15.6784	15.2089	14.9934	15.887	16.2724	16.0756	Trim30a	0.333394	0.3079	0.51159	4	4	1	0
F8WIE5	F8WIE5_MOUSE	Hectd1	E3 ubiquitin-protein ligase	142655	134483	128162	135476	150453	166699	176616	189391	17.1222	17.0371	16.9676	17.0477	17.199	17.3469	17.4303	17.531	17.1222	17.0371	16.9676	17.0477	17.199	17.3469	17.4303	17.531	Hectd1	0.333146	0.00495068	2.30534	4	4	1	0
Q6QI06	RICTR_MOUSE	Rictor	Rapamycin-insensitive companion of mTOR	35976.9	45322.1	33910.6	42067	51444.7	46695	50676.9	48097.8	15.1348	15.4679	15.0494	15.3604	15.6507	15.511	15.629	15.5537	15.1348	15.4679	15.0494	15.3604	15.6507	15.511	15.629	15.5537	Rictor	0.33297	0.0174366	1.75854	4	4	1	0
Q6PGH1	BUD31_MOUSE	Bud31	Protein BUD31 homolog	180153	139215	141293	150456	218753	188572	188647	172113	17.4589	17.087	17.1083	17.199	17.7389	17.5248	17.5253	17.393	17.4589	17.087	17.1083	17.199	17.7389	17.5248	17.5253	17.393	Bud31	0.332224	0.0245912	1.60922	4	4	1	0
Q6PE54	DHX40_MOUSE	Dhx40	Probable ATP-dependent RNA helicase DHX40	36727.1	26550.5	34545.7	33646.9	41160.4	50298.4	43619.8	31515.7	15.1646	14.6965	15.0762	15.0382	15.329	15.6182	15.4127	14.9438	15.1646	14.6965	15.0762	15.0382	15.329	15.6182	15.4127	14.9438	Dhx40	0.332065	0.105715	0.975863	4	4	1	0
Q9JHF9	LY96_MOUSE	Ly96	Lymphocyte antigen 96	12601.6	7193.22	14476.6	11250.1	7555.38	16394.6	21853.6	13681.3	13.6213	12.8124	13.8214	13.4577	12.8833	14.0009	14.4156	13.7399	13.6213	12.8124	13.8214	13.4577	12.8833	14.0009	14.4156	13.7399	Ly96	0.331724	0.428075	0.36848	4	4	1	0
Q5PSV9	MDC1_MOUSE	Mdc1	Mediator of DNA damage checkpoint protein 1	144416	145468	135342	156225	163931	187278	192066	188969	17.1399	17.1503	17.0463	17.2533	17.3227	17.5148	17.5512	17.5278	17.1399	17.1503	17.0463	17.2533	17.3227	17.5148	17.5512	17.5278	Mdc1	0.331714	0.00268819	2.57054	4	4	1	0
O35491	CLK2_MOUSE	Clk2	Dual specificity protein kinase CLK2	49660.7	30772.5	29961.4	23083.7	41439.1	45712.5	39216.5	35672.5	15.5998	14.9094	14.8708	14.4946	15.3387	15.4803	15.2592	15.1225	15.5998	14.9094	14.8708	14.4946	15.3387	15.4803	15.2592	15.1225	Clk2	0.331532	0.21992	0.657734	4	4	1	0
P61025	CKS1_MOUSE	Cks1b	Cyclin-dependent kinases regulatory subunit 1	262538	260130	350434	235162	253261	369282	448468	336335	18.0022	17.9889	18.4188	17.8433	17.9503	18.4944	18.7746	18.3595	18.0022	17.9889	18.4188	17.8433	17.9503	18.4944	18.7746	18.3595	Cks1b	0.331424	0.168259	0.774023	4	4	1	0
P49300	CLC10_MOUSE	Clec10a	C-type lectin domain family 10 member A	32719.1	41366.7	39712.8	48634	43224	44741.5	52985.4	63910.1	14.9978	15.3362	15.2773	15.5697	15.3995	15.4493	15.6933	15.9638	14.9978	15.3362	15.2773	15.5697	15.3995	15.4493	15.6933	15.9638	Clec10a	0.331228	0.107	0.970614	4	4	1	0
Q9D0F1	NDC80_MOUSE	Ndc80	Kinetochore protein NDC80 homolog	49569.3	45429.8	45880.6	50598.4	58606.7	75800.7	51042.7	57711.1	15.5972	15.4714	15.4856	15.6268	15.8388	16.2099	15.6394	15.8166	15.5972	15.4714	15.4856	15.6268	15.8388	16.2099	15.6394	15.8166	Ndc80	0.330942	0.0393316	1.40526	4	4	1	0
Q9CYZ6	REX1B_MOUSE	Rex1bd	Required for excision 1-B domain-containing protein	20295.3	26272.7	37719.1	22854.7	26752.2	34693.5	43357.8	28562.4	14.3089	14.6813	15.203	14.4802	14.7074	15.0824	15.404	14.8018	14.3089	14.6813	15.203	14.4802	14.7074	15.0824	15.404	14.8018	Rex1bd	0.330559	0.233032	0.632585	4	4	1	0
Q8CIF6	SIDT2_MOUSE	Sidt2	SID1 transmembrane family member 2	47104.3	55560.8	30513.3	36076.7	62647.6	43441	42407.8	62388.5	15.5236	15.7618	14.8972	15.1388	15.935	15.4068	15.372	15.929	15.5236	15.7618	14.8972	15.1388	15.935	15.4068	15.372	15.929	Sidt2	0.330374	0.232507	0.633564	4	4	1	0
Q8BND5	QSOX1_MOUSE	Qsox1	Sulfhydryl oxidase 1	16595.5	18834.9	22764.4	13688.3	17541.2	23372	20587.6	28805.6	14.0185	14.2011	14.4745	13.7407	14.0985	14.5125	14.3295	14.8141	14.0185	14.2011	14.4745	13.7407	14.0985	14.5125	14.3295	14.8141	Qsox1	0.329933	0.177536	0.750715	4	4	1	0
Q9CZG9	PDZ11_MOUSE	Pdzd11	PDZ domain-containing protein 11	16045	16362.9	19265.3	11063.6	25719.8	16237.5	23782.2	14052.7	13.9698	13.9981	14.2337	13.4335	14.6506	13.987	14.5376	13.7786	13.9698	13.9981	14.2337	13.4335	14.6506	13.987	14.5376	13.7786	Pdzd11	0.32964	0.268516	0.57103	4	4	1	0
Q8BGV4	TTI2_MOUSE	Tti2	TELO2-interacting protein 2	10169.9	8036.88	19705.8	5582.91	13565.5	8628.34	14944.4	12817.5	13.312	12.9724	14.2663	12.4468	13.7277	13.0749	13.8673	13.6458	13.312	12.9724	14.2663	12.4468	13.7277	13.0749	13.8673	13.6458	Tti2	0.329524	0.463146	0.334282	4	4	1	0
A0A338P6I9	A0A338P6I9_MOUSE	Gm56451	Predicted gene, 56451	18420.9	14191.2	32617	21818	20227.7	20197.8	34545.8	32864.2	14.1691	13.7927	14.9933	14.4132	14.304	14.3019	15.0762	15.0042	14.1691	13.7927	14.9933	14.4132	14.304	14.3019	15.0762	15.0042	Gm56451	0.329519	0.356616	0.4478	4	4	1	0
Q6DFW4	NOP58_MOUSE	Nop58	Nucleolar protein 58	163763	160478	186237	162136	202529	213135	205005	223576	17.3212	17.292	17.5068	17.3068	17.6278	17.7014	17.6453	17.7704	17.3212	17.292	17.5068	17.3068	17.6278	17.7014	17.6453	17.7704	Nop58	0.329498	0.00149605	2.82505	4	4	1	0
A2A5R2	BIG2_MOUSE	Arfgef2	Brefeldin A-inhibited guanine nucleotide-exchange protein 2	128233	68008.5	69554.4	122084	117484	122472	132333	96934.1	16.9684	16.0534	16.0859	16.8975	16.8421	16.9021	17.0138	16.5647	16.9684	16.0534	16.0859	16.8975	16.8421	16.9021	17.0138	16.5647	Arfgef2	0.329381	0.264068	0.578284	4	4	1	0
D3Z4Z0	D3Z4Z0_MOUSE	Tada2b	Transcriptional adapter	30739.3	28469.8	28788.9	23388	32349.7	34957	34996.2	37050.1	14.9078	14.7971	14.8132	14.5135	14.9815	15.0933	15.0949	15.1772	14.9078	14.7971	14.8132	14.5135	14.9815	15.0933	15.0949	15.1772	Tada2b	0.328803	0.0128985	1.88946	4	4	1	0
E0CY96;G3X8S8	E0CY96_MOUSE;G3X8S8_MOUSE	Tsen15	tRNA splicing endonuclease subunit 15	38836.4	52431.2	43312.3	37165.3	44256.1	55909.1	58389.7	56423.9	15.2451	15.6781	15.4025	15.1817	15.4336	15.7708	15.8334	15.784	15.2451	15.6781	15.4025	15.1817	15.4336	15.7708	15.8334	15.784	Tsen15	0.328603	0.062149	1.20657	4	4	1	0
Q80X44	ZBT24_MOUSE	Zbtb24	Zinc finger and BTB domain-containing protein 24	21850.3		30407.1	18292.3	20736.7	21926.4	17362.8	17938.5	14.4154		14.8921	14.1589	14.3399	14.4204	14.0837	14.1308	14.4154	12.1943	14.8921	14.1589	14.3399	14.4204	14.0837	14.1308	Zbtb24	0.328499	0.60314	0.219582	4	3	1	0
O55187	CBX4_MOUSE	Cbx4	E3 SUMO-protein ligase CBX4	16953.4	16379	21664.5	21535.6	19746.2	28792.3	21239.9	26661.1	14.0493	13.9996	14.403	14.3944	14.2693	14.8134	14.3745	14.7024	14.0493	13.9996	14.403	14.3944	14.2693	14.8134	14.3745	14.7024	Cbx4	0.328323	0.100245	0.998937	4	4	1	0
P61255	RL26_MOUSE	Rpl26	Large ribosomal subunit protein uL24	2035080	1770370	1551760	2078140	2967960	2266080	2193280	1956200	20.9567	20.7556	20.5655	20.9869	21.501	21.1118	21.0647	20.8996	20.9567	20.7556	20.5655	20.9869	21.501	21.1118	21.0647	20.8996	Rpl26	0.32812	0.0872343	1.05931	4	4	1	0
B2RXQ2;B2RXW8	B2RXQ2_MOUSE;B2RXW8_MOUSE	Ppfia1	Ppfia1 protein	37443.5	32849.5	34105.3	43409	40447.3	42952.7	53808.6	48363.5	15.1924	15.0036	15.0577	15.4057	15.3038	15.3905	15.7155	15.5616	15.1924	15.0036	15.0577	15.4057	15.3038	15.3905	15.7155	15.5616	Ppfia1	0.327993	0.042849	1.36806	4	4	1	0
F6XGN0	F6XGN0_MOUSE	Nup210	Nucleoporin 210 (Fragment)	60896.4	45854	43937.5	36986.3	64240.7	65717.6	63503.7	41944.6	15.8941	15.4848	15.4232	15.1747	15.9712	16.004	15.9546	15.3562	15.8941	15.4848	15.4232	15.1747	15.9712	16.004	15.9546	15.3562	Nup210	0.327311	0.179521	0.745885	4	4	1	0
D3Z7P3	GLSK_MOUSE	Gls	Glutaminase kidney isoform, mitochondrial	163408	140169	131190	141743	149380	152578	204188	226741	17.3181	17.0968	17.0013	17.1129	17.1886	17.2192	17.6395	17.7907	17.3181	17.0968	17.0013	17.1129	17.1886	17.2192	17.6395	17.7907	Gls	0.327224	0.0945451	1.02436	4	4	1	0
P59178	LMBL2_MOUSE	L3mbtl2	Lethal(3)malignant brain tumor-like protein 2	11289.6	18831.1	19348.4	10196.7	13316.4	16018.5	21746.9	22397.3	13.4627	14.2008	14.2399	13.3158	13.7009	13.9675	14.4085	14.451	13.4627	14.2008	14.2399	13.3158	13.7009	13.9675	14.4085	14.451	L3mbtl2	0.327162	0.32007	0.494755	4	4	1	0
Q58FA4	E2F8_MOUSE	E2f8	Transcription factor E2F8	23250.4	21487.3	20840.2	21970.1	26833.6	30060.3	24853.2	28248.5	14.505	14.3912	14.3471	14.4233	14.7118	14.8756	14.6011	14.7859	14.505	14.3912	14.3471	14.4233	14.7118	14.8756	14.6011	14.7859	E2f8	0.326964	0.00276302	2.55862	4	4	1	0
Q99JP6	HOME3_MOUSE	Homer3	Homer protein homolog 3	17063.3	17374.9	24692.3	15264.1	20891.1	20012.2	27512.4	24046.2	14.0586	14.0847	14.5918	13.8979	14.3506	14.2886	14.7478	14.5535	14.0586	14.0847	14.5918	13.8979	14.3506	14.2886	14.7478	14.5535	Homer3	0.326889	0.124143	0.906077	4	4	1	0
O55234	PSB5_MOUSE	Psmb5	Proteasome subunit beta type-5	104230	86129.4	98549.9	99006	93755.2	126496	122470	149244	16.6694	16.3942	16.5886	16.5952	16.5166	16.9487	16.9021	17.1873	16.6694	16.3942	16.5886	16.5952	16.5166	16.9487	16.9021	17.1873	Psmb5	0.326825	0.073342	1.13465	4	4	1	0
Q9CZT4	RPC5_MOUSE	Polr3e	DNA-directed RNA polymerase III subunit RPC5	18936.9	19308.4	16257.3	14513.1	23724.9	27328.2	17238.1	19096	14.2089	14.2369	13.9888	13.8251	14.5341	14.7381	14.0733	14.221	14.2089	14.2369	13.9888	13.8251	14.5341	14.7381	14.0733	14.221	Polr3e	0.326698	0.11776	0.929001	4	4	1	0
Q9R1P0	PSA4_MOUSE	Psma4	Proteasome subunit alpha type-4	201794	133937	78022	111817	175552	176815	141162	133058	17.6225	17.0312	16.2516	16.7708	17.4215	17.4319	17.107	17.0217	17.6225	17.0312	16.2516	16.7708	17.4215	17.4319	17.107	17.0217	Psma4	0.326504	0.324283	0.489076	4	4	1	0
Q91W50	CSDE1_MOUSE	Csde1	Cold shock domain-containing protein E1	860603	944461	767279	760542	940310	1100460	1002180	1130820	19.715	19.8491	19.5494	19.5367	19.8428	20.0697	19.9347	20.1089	19.715	19.8491	19.5494	19.5367	19.8428	20.0697	19.9347	20.1089	Csde1	0.32648	0.014713	1.8323	4	4	1	0
Q9CY94	PSF3_MOUSE	Gins3	DNA replication complex GINS protein PSF3	59054.5	50111.4	50482.7	58339.6	74852.9	62845.1	64817	70550.7	15.8498	15.6129	15.6235	15.8322	16.1918	15.9395	15.9841	16.1064	15.8498	15.6129	15.6235	15.8322	16.1918	15.9395	15.9841	16.1064	Gins3	0.32586	0.00926773	2.03303	4	4	1	0
Q9DB70	FUND1_MOUSE	Fundc1	FUN14 domain-containing protein 1		19998.8		18684.7		22482.2	16919.9	12881.6		14.2876		14.1896		14.4565	14.0464	13.653	12.2035	14.2876	12.2707	14.1896	12.0989	14.4565	14.0464	13.653	Fundc1	0.325852	0.688577	0.162048	3	2	1	0
Q9CZX5	PINX1_MOUSE	Pinx1	PIN2/TERF1-interacting telomerase inhibitor 1	26940.7	29027.2	17094.3	29148.6	21688.3	42212.7	27673.4	37942.3	14.7175	14.8251	14.0612	14.8311	14.4046	15.3654	14.7562	15.2115	14.7175	14.8251	14.0612	14.8311	14.4046	15.3654	14.7562	15.2115	Pinx1	0.325692	0.298498	0.525059	4	4	1	0
P46467	VPS4B_MOUSE	Vps4b	Vacuolar protein sorting-associated protein 4B	198907	193146	195670	189013	244394	220026	238672	273107	17.6017	17.5593	17.5781	17.5281	17.8988	17.7473	17.8647	18.0591	17.6017	17.5593	17.5781	17.5281	17.8988	17.7473	17.8647	18.0591	Vps4b	0.325671	0.00265324	2.57622	4	4	1	0
E9Q7C4	E9Q7C4_MOUSE	Prr14l	Proline rich 14-like		22976.1	21475.4	20589	14476.4	17395.6	25064.2	18722.9		14.4878	14.3904	14.3296	13.8214	14.0864	14.6133	14.1925	12.2035	14.4878	14.3904	14.3296	13.8214	14.0864	14.6133	14.1925	Prr14l	0.325588	0.591649	0.227936	4	3	1	0
P49282	NRAM2_MOUSE	Slc11a2	Natural resistance-associated macrophage protein 2			5262.99		4113.67	4519.91	9268.89	7915.47			12.3617		12.0062	12.1421	13.1782	12.9505	12.2035	12.1943	12.3617	12.2163	12.0062	12.1421	13.1782	12.9505	Slc11a2	0.325273	0.31032	0.50819	4	1	1	0
P56959	FUS_MOUSE	Fus	RNA-binding protein FUS	1348480	1349820	1377080	1272500	1337720	1760020	1838260	1815100	20.3629	20.3643	20.3932	20.2792	20.3513	20.7472	20.8099	20.7916	20.3629	20.3643	20.3932	20.2792	20.3513	20.7472	20.8099	20.7916	Fus	0.325095	0.0267204	1.57316	4	4	1	0
Q8C7H1	MMAA_MOUSE	Mmaa	Methylmalonic aciduria type A homolog, mitochondrial	155211	151145	143536	152853	212400	223228	161831	165032	17.2439	17.2056	17.1311	17.2218	17.6964	17.7682	17.3041	17.3324	17.2439	17.2056	17.1311	17.2218	17.6964	17.7682	17.3041	17.3324	Mmaa	0.324704	0.038559	1.41387	4	4	1	0
Q9CWH5	TRM11_MOUSE	Trmt11	tRNA (guanine(10)-N2)-methyltransferase homolog	19227.1	19373.8	22492.8	17948.2	19328.8	26107.6	20573.1	35617.2	14.2309	14.2418	14.4572	14.1316	14.2385	14.6722	14.3285	15.1203	14.2309	14.2418	14.4572	14.1316	14.2385	14.6722	14.3285	15.1203	Trmt11	0.324501	0.175716	0.75519	4	4	1	0
P47930	FOSL2_MOUSE	Fosl2	Fos-related antigen 2	6348.35	6694.67	8126.01	5424.52	7983.53	9298.76	8752.87	7087.83	12.6322	12.7088	12.9883	12.4053	12.9628	13.1828	13.0955	12.7911	12.6322	12.7088	12.9883	12.4053	12.9628	13.1828	13.0955	12.7911	Fosl2	0.324432	0.0700777	1.15442	4	4	1	0
Q9Z2U0	PSA7_MOUSE	Psma7	Proteasome subunit alpha type-7	787317	529074	371347	581104	789963	711431	665226	590801	19.5866	19.0131	18.5024	19.1484	19.5914	19.4404	19.3435	19.1723	19.5866	19.0131	18.5024	19.1484	19.5914	19.4404	19.3435	19.1723	Psma7	0.324262	0.225273	0.647291	4	4	1	0
Q9CQM5	TXD17_MOUSE	Txndc17	Thioredoxin domain-containing protein 17	50583.2	41698.6	31082.5	47883.5	69596.6	89177.2	32713.5	37967.3	15.6264	15.3477	14.9238	15.5472	16.0867	16.4444	14.9976	15.2125	15.6264	15.3477	14.9238	15.5472	16.0867	16.4444	14.9976	15.2125	Txndc17	0.324012	0.426248	0.370338	4	4	1	0
Q9D8Y1	T126A_MOUSE	Tmem126a	Transmembrane protein 126A	21695.1	12974.6	26069.1	10635.5	18598.1	19160.8	20857.1	25781.3	14.4051	13.6634	14.6701	13.3766	14.1829	14.2259	14.3483	14.654	14.4051	13.6634	14.6701	13.3766	14.1829	14.2259	14.3483	14.654	Tmem126a	0.323972	0.353769	0.45128	4	4	1	0
Q9CWS4	INT11_MOUSE	Ints11	Integrator complex subunit 11	52170.6	59813.4	58851.8	62542.5	75008.2	77963	71017.9	67833.6	15.6709	15.8682	15.8448	15.9325	16.1948	16.2505	16.1159	16.0497	15.6709	15.8682	15.8448	15.9325	16.1948	16.2505	16.1159	16.0497	Ints11	0.323598	0.00390499	2.40838	4	4	1	0
Q3UHD6	SNX27_MOUSE	Snx27	Sorting nexin-27	130769	79835	166235	69766.4	144890	118197	219347	79047.8	16.9967	16.2847	17.3429	16.0902	17.1446	16.8508	17.7429	16.2704	16.9967	16.2847	17.3429	16.0902	17.1446	16.8508	17.7429	16.2704	Snx27	0.323555	0.475656	0.322707	4	4	1	0
Q8R0H9	GGA1_MOUSE	Gga1	ADP-ribosylation factor-binding protein GGA1	245319	169888	165089	224029	290498	313370	264785	156671	17.9043	17.3742	17.3329	17.7733	18.1482	18.2575	18.0145	17.2574	17.9043	17.3742	17.3329	17.7733	18.1482	18.2575	18.0145	17.2574	Gga1	0.323196	0.27247	0.564681	4	4	1	0
O08832	GALT4_MOUSE	Galnt4	Polypeptide N-acetylgalactosaminyltransferase 4	26530.1	30441.6	35614.9	40390.9	33601.9	34262.9	46813.6	52776.8	14.6953	14.8938	15.1202	15.3017	15.0363	15.0644	15.5146	15.6876	14.6953	14.8938	15.1202	15.3017	15.0363	15.0644	15.5146	15.6876	Galnt4	0.322959	0.174687	0.75774	4	4	1	0
P54775	PRS6B_MOUSE	Psmc4	26S proteasome regulatory subunit 6B	1076240	1196390	993035	896657	1386280	1252810	1405870	1149160	20.0376	20.1903	19.9215	19.7742	20.4028	20.2567	20.423	20.1321	20.0376	20.1903	19.9215	19.7742	20.4028	20.2567	20.423	20.1321	Psmc4	0.322799	0.0274432	1.56157	4	4	1	0
Q91WE6	CDKAL_MOUSE	Cdkal1	Threonylcarbamoyladenosine tRNA methylthiotransferase	22844.7	16467	22454.7	23541.1	23649.9	26465.3	30821	25222.3	14.4796	14.0073	14.4547	14.5229	14.5295	14.6918	14.9116	14.6224	14.4796	14.0073	14.4547	14.5229	14.5295	14.6918	14.9116	14.6224	Cdkal1	0.322728	0.0681525	1.16652	4	4	1	0
Q8C8M1	SHCAF_MOUSE	Sinhcaf	SIN3-HDAC complex-associated factor	10734	12845.1	11545.2	14924.3	15648.1	14161.7	14304.4	18337	13.3899	13.6489	13.495	13.8654	13.9337	13.7897	13.8042	14.1625	13.3899	13.6489	13.495	13.8654	13.9337	13.7897	13.8042	14.1625	Sinhcaf	0.322709	0.0534435	1.2721	4	4	1	0
Q9ES61	Q9ES61_MOUSE	Ms4a4b	Chandra protein	4948.08	7243.12	6715.76	8895.59	7725.77	10990.9	8711.64	7072.35	12.2727	12.8224	12.7133	13.1189	12.9155	13.424	13.0887	12.788	12.2727	12.8224	12.7133	13.1189	12.9155	13.424	13.0887	12.788	Ms4a4b	0.322232	0.198759	0.701673	4	4	1	0
Q8R1F0	L10K_MOUSE	D8Ertd738e	Leydig cell tumor 10 kDa protein homolog	228282	271658	280266	265205	330336	368139	381203	242609	17.8005	18.0514	18.0964	18.0167	18.3336	18.4899	18.5402	17.8883	17.8005	18.0514	18.0964	18.0167	18.3336	18.4899	18.5402	17.8883	D8Ertd738e	0.321716	0.0944708	1.0247	4	4	1	0
Q9JMG1	EDF1_MOUSE	Edf1	Endothelial differentiation-related factor 1	408308	331703	303516	278468	480659	387886	408512	366572	18.6393	18.3395	18.2114	18.0872	18.8747	18.5653	18.64	18.4837	18.6393	18.3395	18.2114	18.0872	18.8747	18.5653	18.64	18.4837	Edf1	0.321572	0.0688668	1.16199	4	4	1	0
Q6PHU5	SORT_MOUSE	Sort1	Sortilin	291007	244709	255816	256377	319673	337258	348949	302567	18.1507	17.9007	17.9647	17.9679	18.2862	18.3635	18.4127	18.2069	18.1507	17.9007	17.9647	17.9679	18.2862	18.3635	18.4127	18.2069	Sort1	0.321307	0.00378568	2.42186	4	4	1	0
Q3UIA2	RHG17_MOUSE	Arhgap17	Rho GTPase-activating protein 17	593262	618845	674983	491620	625859	781044	861026	705273	19.1783	19.2392	19.3645	18.9072	19.2555	19.575	19.7157	19.4278	19.1783	19.2392	19.3645	18.9072	19.2555	19.575	19.7157	19.4278	Arhgap17	0.321209	0.058915	1.22977	4	4	1	0
Q9Z1S0	BUB1B_MOUSE	Bub1b	Mitotic checkpoint serine/threonine-protein kinase BUB1 beta	49407	44048.5	78282.6	48073.4	66822.7	76129.1	67168.1	58338.2	15.5924	15.4268	16.2564	15.553	16.0281	16.2162	16.0355	15.8322	15.5924	15.4268	16.2564	15.553	16.0281	16.2162	16.0355	15.8322	Bub1b	0.320816	0.163842	0.785575	4	4	1	0
Q9CX48	ZCH10_MOUSE	Zcchc10	Zinc finger CCHC domain-containing protein 10			4524.85	2823.62		3543.78	6296.68	7020.75			12.1437	11.4633		11.7911	12.6204	12.7774	12.2035	12.1943	12.1437	11.4633	12.0989	11.7911	12.6204	12.7774	Zcchc10	0.320732	0.312566	0.505058	3	2	1	0
Q5SYL3	BLTP2_MOUSE	Bltp2	Bridge-like lipid transfer protein family member 2	4183.88	4108.82	5155.8	8160.52		9025.98	3930.99	11299.1	12.0306	12.0045	12.332	12.9944		13.1399	11.9407	13.4639	12.0306	12.0045	12.332	12.9944	12.0989	13.1399	11.9407	13.4639	Bltp2	0.320454	0.495831	0.304667	3	4	1	0
Q921N8	GPS2_MOUSE	Gps2	G protein pathway suppressor 2	105014	96571.6	107969	77055.9	85150.6	119487	140123	143388	16.6802	16.5593	16.7203	16.2336	16.3777	16.8665	17.0963	17.1296	16.6802	16.5593	16.7203	16.2336	16.3777	16.8665	17.0963	17.1296	Gps2	0.319178	0.17147	0.765812	4	4	1	0
O35664	INAR2_MOUSE	Ifnar2	Interferon alpha/beta receptor 2	19735.1	18036.9	24154.8	21339.1	26237.1	21366.1	25562.5	31020.8	14.2685	14.1387	14.56	14.3812	14.6793	14.383	14.6417	14.9209	14.2685	14.1387	14.56	14.3812	14.6793	14.383	14.6417	14.9209	Ifnar2	0.319168	0.0653217	1.18494	4	4	1	0
Q6PDZ2	TAF1C_MOUSE	Taf1c	TATA box-binding protein-associated factor RNA polymerase I subunit C	5951.02	4177.14	10165.7	7838.6	7649.87	8893.17	8405.3	8391.05	12.5389	12.0283	13.3114	12.9364	12.9012	13.1185	13.0371	13.0346	12.5389	12.0283	13.3114	12.9364	12.9012	13.1185	13.0371	13.0346	Taf1c	0.319099	0.295596	0.529302	4	4	1	0
O09172	GSH0_MOUSE	Gclm	Glutamate--cysteine ligase regulatory subunit	83728.5	89753.6	84321.7	100792	114022	115248	91448.8	128736	16.3534	16.4537	16.3636	16.621	16.799	16.8144	16.4807	16.9741	16.3534	16.4537	16.3636	16.621	16.799	16.8144	16.4807	16.9741	Gclm	0.319079	0.0380972	1.41911	4	4	1	0
Q3UHF3	MIER3_MOUSE	Mier3	Mesoderm induction early response protein 3	32925.1	40483.3	51322.5	40749.6	34717.9	52273	61213.1	60695	15.0069	15.305	15.6473	15.3145	15.0834	15.6738	15.9016	15.8893	15.0069	15.305	15.6473	15.3145	15.0834	15.6738	15.9016	15.8893	Mier3	0.318568	0.219123	0.659312	4	4	1	0
A0A0A6YXD3	A0A0A6YXD3_MOUSE	Ndufs2	NADH dehydrogenase [ubiquinone] iron-sulfur protein 2, mitochondrial (Fragment)	22031.9	20143.9	38481.2	17986.4	25961	27639.1	32781.1	31584.3	14.4273	14.2981	15.2319	14.1346	14.6641	14.7544	15.0006	14.9469	14.4273	14.2981	15.2319	14.1346	14.6641	14.7544	15.0006	14.9469	Ndufs2	0.318533	0.260382	0.584389	4	4	1	0
Q9CQ06	RM24_MOUSE	Mrpl24	Large ribosomal subunit protein uL24m	109275	116669	140385	111816	136091	158698	156215	143443	16.7376	16.8321	17.099	16.7708	17.0542	17.2759	17.2532	17.1301	16.7376	16.8321	17.099	16.7708	17.0542	17.2759	17.2532	17.1301	Mrpl24	0.318492	0.016997	1.76963	4	4	1	0
Q07279	NFE2_MOUSE	Nfe2	Transcription factor NF-E2 45 kDa subunit	12297.6	11635	9263.7	10764	13249.6	14056.3	10545.4	17566.4	13.5861	13.5062	13.1774	13.3939	13.6937	13.7789	13.3643	14.1005	13.5861	13.5062	13.1774	13.3939	13.6937	13.7789	13.3643	14.1005	Nfe2	0.318469	0.119318	0.923295	4	4	1	0
A0A2R8VHF9;A0A338P6K2;E9QPE7	A0A2R8VHF9_MOUSE;A0A338P6K2_MOUSE;E9QPE7_MOUSE	Myh11	Myosin-11	47217.5	40422.7	40475.1	45883.5	44704.2	55873	62084.6	55239.7	15.527	15.3029	15.3047	15.4857	15.4481	15.7699	15.9219	15.7534	15.527	15.3029	15.3047	15.4857	15.4481	15.7699	15.9219	15.7534	Myh11	0.318251	0.0330755	1.48049	4	4	1	0
Q8QZT1	THIL_MOUSE	Acat1	Acetyl-CoA acetyltransferase, mitochondrial	956369	722555	1080910	647045	891775	1105110	1088420	1088160	19.8672	19.4627	20.0438	19.3035	19.7663	20.0758	20.0538	20.0535	19.8672	19.4627	20.0438	19.3035	19.7663	20.0758	20.0538	20.0535	Acat1	0.318016	0.140595	0.852031	4	4	1	0
A0A2R8W6Q1	A0A2R8W6Q1_MOUSE	Pphln1	Periphilin 1 (Fragment)	3983.56		7532.09	3533.84	5178.68	7211.05	5823.48	5517.91	11.9598		12.8788	11.787	12.3384	12.816	12.5077	12.4299	11.9598	12.1943	12.8788	11.787	12.3384	12.816	12.5077	12.4299	Pphln1	0.317976	0.268932	0.570357	4	3	1	0
Q9R059	FHL3_MOUSE	Fhl3	Four and a half LIM domains protein 3	42287.7	31697.2	25450.1	32373.8	37834.9	42108.4	42650.8	39152.2	15.368	14.9521	14.6354	14.9825	15.2074	15.3618	15.3803	15.2568	15.368	14.9521	14.6354	14.9825	15.2074	15.3618	15.3803	15.2568	Fhl3	0.3171	0.0877514	1.05675	4	4	1	0
Q8VBW6	ULA1_MOUSE	Nae1	NEDD8-activating enzyme E1 regulatory subunit	111137	103481	93790.7	99258	116128	126321	140383	125091	16.762	16.659	16.5172	16.5989	16.8254	16.9467	17.099	16.9326	16.762	16.659	16.5172	16.5989	16.8254	16.9467	17.099	16.9326	Nae1	0.31667	0.00602427	2.2201	4	4	1	0
Q9D0L4	ADCK1_MOUSE	Adck1	AarF domain-containing protein kinase 1	20528.5	25466.4	20626.5	19456.4	23650	26028.6	28487	28779.2	14.3253	14.6363	14.3322	14.248	14.5296	14.6678	14.798	14.8127	14.3253	14.6363	14.3322	14.248	14.5296	14.6678	14.798	14.8127	Adck1	0.316575	0.0264956	1.57683	4	4	1	0
Q9Z1F6	CNMD_MOUSE	Cnmd	Leukocyte cell-derived chemotaxin 1	15978.2	26296.6	16767.9	8523.74	54779.3	9371.92	5117.74	54962.4	13.9638	14.6826	14.0334	13.0573	15.7413	13.1941	12.3213	15.7462	13.9638	14.6826	14.0334	13.0573	15.7413	13.1941	12.3213	15.7462	Cnmd	0.316457	0.748225	0.125968	4	4	1	0
Q9CPR1	RWDD4_MOUSE	Rwdd4	RWD domain-containing protein 4	22386	31689.9	30406.2	21902.6	48479.2	23080.6	17354.2	58471.4	14.4503	14.9517	14.8921	14.4188	15.5651	14.4944	14.083	15.8354	14.4503	14.9517	14.8921	14.4188	15.5651	14.4944	14.083	15.8354	Rwdd4	0.316244	0.501988	0.299307	4	4	1	0
Q8K4T5	DUS19_MOUSE	Dusp19	Dual specificity protein phosphatase 19	11868.4	13394	14764.3	9820.57	14033	16067.4	14511.5	16911	13.5348	13.7093	13.8498	13.2616	13.7765	13.9718	13.8249	14.0457	13.5348	13.7093	13.8498	13.2616	13.7765	13.9718	13.8249	14.0457	Dusp19	0.315854	0.0668674	1.17479	4	4	1	0
Q91Z53	GRHPR_MOUSE	Grhpr	Glyoxylate reductase/hydroxypyruvate reductase	94262.8	97064.1	95562.8	84976	111071	109597	117905	124185	16.5244	16.5667	16.5442	16.3748	16.7611	16.7418	16.8473	16.9221	16.5244	16.5667	16.5442	16.3748	16.7611	16.7418	16.8473	16.9221	Grhpr	0.315597	0.00192159	2.71634	4	4	1	0
Q9R0Q4	MO4L2_MOUSE	Morf4l2	Mortality factor 4-like protein 2	8093.14	7829	11636.9	5730.78	8989.19	7010.27	12740.7	12592.1	12.9825	12.9346	13.5064	12.4845	13.134	12.7753	13.6372	13.6202	12.9825	12.9346	13.5064	12.4845	13.134	12.7753	13.6372	13.6202	Morf4l2	0.314647	0.327012	0.485436	4	4	1	0
P51683	CCR2_MOUSE	Ccr2	C-C chemokine receptor type 2	114710	114819	67161.9	115675	156430	84944.7	118439	155499	16.8076	16.809	16.0354	16.8197	17.2552	16.3742	16.8538	17.2465	16.8076	16.809	16.0354	16.8197	17.2552	16.3742	16.8538	17.2465	Ccr2	0.314504	0.311738	0.50621	4	4	1	0
B2LVG5;B2LVG6;E0CXT7	B2LVG5_MOUSE;B2LVG6_MOUSE;E0CXT7_MOUSE	Cpsf4	Cleavage and polyadenylation specificity factor subunit 4	58274.9	82539.5	74002	69301.6	75160.9	87145.2	103431	87079.6	15.8306	16.3328	16.1753	16.0806	16.1977	16.4111	16.6583	16.41	15.8306	16.3328	16.1753	16.0806	16.1977	16.4111	16.6583	16.41	Cpsf4	0.314481	0.0674672	1.17091	4	4	1	0
P27048;P63163	RSMB_MOUSE;RSMN_MOUSE	Snrpb;Snrpn	Small nuclear ribonucleoprotein-associated protein B	883183	770857	749181	844230	867063	1051160	1381470	817820	19.7524	19.5561	19.515	19.6873	19.7258	20.0036	20.3978	19.6414	19.7524	19.5561	19.515	19.6873	19.7258	20.0036	20.3978	19.6414	Snrpb;Snrpn	0.314459	0.129904	0.886377	4	4	1	0
Q99LH4	ZN672_MOUSE	Znf672	Zinc finger protein 672	23874.1	19240	24289.5	27284.5	22022.8	31991.3	36739.6	28120.8	14.5432	14.2318	14.568	14.7358	14.4267	14.9654	15.165	14.7794	14.5432	14.2318	14.568	14.7358	14.4267	14.9654	15.165	14.7794	Znf672	0.31442	0.147067	0.832484	4	4	1	0
Q3U1V6	UEVLD_MOUSE	Uevld	Ubiquitin-conjugating enzyme E2 variant 3	56648.2	51527.6	75938.6	51416.6	85916	77145.4	69044.6	59518.6	15.7897	15.6531	16.2125	15.6499	16.3906	16.2353	16.0752	15.8611	15.7897	15.6531	16.2125	15.6499	16.3906	16.2353	16.0752	15.8611	Uevld	0.314233	0.121881	0.914065	4	4	1	0
Q920I9	WDR7_MOUSE	Wdr7	WD repeat-containing protein 7	15980.3	19521.8	22817.9	15710	34647.3	17403.5	20619.1	21489.2	13.964	14.2528	14.4779	13.9394	15.0805	14.0871	14.3317	14.3913	13.964	14.2528	14.4779	13.9394	15.0805	14.0871	14.3317	14.3913	Wdr7	0.314121	0.253169	0.596589	4	4	1	0
Q91ZN5	S35B2_MOUSE	Slc35b2	Adenosine 3'-phospho 5'-phosphosulfate transporter 1	17369.3	21071.1	19707.3	22325.4	22929.9	27452.2	21586.5	28283	14.0843	14.363	14.2664	14.4464	14.4849	14.7446	14.3978	14.7876	14.0843	14.363	14.2664	14.4464	14.4849	14.7446	14.3978	14.7876	Slc35b2	0.313749	0.0439811	1.35673	4	4	1	0
O54790	MAFG_MOUSE	Mafg	Transcription factor MafG	79995.9	117825	113969	95107.5	120183	121918	133815	124359	16.2876	16.8463	16.7983	16.5373	16.8749	16.8956	17.0299	16.9242	16.2876	16.8463	16.7983	16.5373	16.8749	16.8956	17.0299	16.9242	Mafg	0.313745	0.0573188	1.2417	4	4	1	0
P0DPE0	EFMT4_MOUSE	Eef1akmt4	EEF1A lysine methyltransferase 4	9843.84	15860.5	19970.9	11343.2	13232.6	16861.8	18558	20379.7	13.265	13.9532	14.2856	13.4695	13.6918	14.0415	14.1798	14.3148	13.265	13.9532	14.2856	13.4695	13.6918	14.0415	14.1798	14.3148	Eef1akmt4	0.313643	0.285015	0.545133	4	4	1	0
E9PYL2	PRR12_MOUSE	Prr12	Proline-rich protein 12	44410	49905.6	37888.4	66822.9	57257.4	60259.2	60862.6	63670.9	15.4386	15.6069	15.2095	16.0281	15.8052	15.8789	15.8933	15.9583	15.4386	15.6069	15.2095	16.0281	15.8052	15.8789	15.8933	15.9583	Prr12	0.313162	0.124896	0.903451	4	4	1	0
O55125	NIPS1_MOUSE	Nipsnap1	Protein NipSnap homolog 1	24309.9	23396.9	23116.3	21840.2	22091.9	21882.3	29495.2	47983.6	14.5693	14.514	14.4966	14.4147	14.4312	14.4175	14.8482	15.5503	14.5693	14.514	14.4966	14.4147	14.4312	14.4175	14.8482	15.5503	Nipsnap1	0.313136	0.286285	0.543201	4	4	1	0
P11627	L1CAM_MOUSE	L1cam	Neural cell adhesion molecule L1	24788.6	32184.8	38873.7	30695.1	33642.2	32246	43688.7	47852.1	14.5974	14.9741	15.2465	14.9057	15.038	14.9768	15.415	15.5463	14.5974	14.9741	15.2465	14.9057	15.038	14.9768	15.415	15.5463	L1cam	0.313094	0.156181	0.806371	4	4	1	0
Q60649	CLPB_MOUSE	Clpb	Mitochondrial disaggregase	21455.5	22438.3	20995.5	22276.2	24732.7	26474.1	28086.3	29159.4	14.3891	14.4537	14.3578	14.4432	14.5941	14.6923	14.7776	14.8317	14.3891	14.4537	14.3578	14.4432	14.5941	14.6923	14.7776	14.8317	Clpb	0.312984	0.00147981	2.82979	4	4	1	0
Q8BVW0	GANC_MOUSE	Ganc	Neutral alpha-glucosidase C	12992.8	10225	10447.1	9149.63	8308.34	13641.5	17414.1	15321.7	13.6654	13.3198	13.3508	13.1595	13.0203	13.7357	14.088	13.9033	13.6654	13.3198	13.3508	13.1595	13.0203	13.7357	14.088	13.9033	Ganc	0.312941	0.268022	0.57183	4	4	1	0
Q3U466;F6SXC2	F6SXC2_MOUSE;Q3U466_MOUSE	Cln6	Ceroid-lipofuscinosis, neuronal 6 (Fragment)	141540	93895	181546	75575.2	109036	157002	172255	147149	17.1109	16.5188	17.47	16.2056	16.7344	17.2604	17.3942	17.1669	17.1109	16.5188	17.47	16.2056	16.7344	17.2604	17.3942	17.1669	Cln6	0.31269	0.364518	0.438281	4	4	1	0
A0A0A0MQ82	A0A0A0MQ82_MOUSE	Map3k6	mitogen-activated protein kinase kinase kinase	16365.6	13017.2	16724.5	13908.1	12185.6	20479.8	24220.1	19497.9	13.9984	13.6681	14.0297	13.7636	13.5729	14.3219	14.5639	14.251	13.9984	13.6681	14.0297	13.7636	13.5729	14.3219	14.5639	14.251	Map3k6	0.312482	0.223211	0.651285	4	4	1	0
Q9JJZ2	TBA8_MOUSE	Tuba8	Tubulin alpha-8 chain	19935.1	28623.9	23840.4	16494.9	19453.1	23315.5	26638.9	44099.9	14.283	14.8049	14.5411	14.0097	14.2477	14.509	14.7012	15.4285	14.283	14.8049	14.5411	14.0097	14.2477	14.509	14.7012	15.4285	Tuba8	0.31191	0.346534	0.460254	4	4	1	0
Q5SV77	GGNB2_MOUSE	Ggnbp2	Gametogenetin-binding protein 2	4014.87	4767.11	5260.14	4194.23	3921.17	6637.14	5820.99	6604.4	11.9711	12.2189	12.3609	12.0342	11.9371	12.6963	12.507	12.6892	11.9711	12.2189	12.3609	12.0342	11.9371	12.6963	12.507	12.6892	Ggnbp2	0.311141	0.170253	0.768906	4	4	1	0
Q8K0C8	COX19_MOUSE	Cox19	Cytochrome c oxidase assembly protein COX19	8450.18	10688.8	4355.69	9387.71	13800.7	12265.4	7155.49	7222.91	13.0448	13.3838	12.0887	13.1966	13.7525	13.5823	12.8048	12.8184	13.0448	13.3838	12.0887	13.1966	13.7525	13.5823	12.8048	12.8184	Cox19	0.311035	0.445853	0.350808	4	4	1	0
Q3UY34	CSTOS_MOUSE	Custos	Protein CUSTOS	24546.7	23591.1	25403.5	26521.7	23808.2	32287.6	36888.2	32565.9	14.5832	14.526	14.6327	14.6949	14.5392	14.9787	15.1709	14.9911	14.5832	14.526	14.6327	14.6949	14.5392	14.9787	15.1709	14.9911	Custos	0.310747	0.0668	1.17522	4	4	1	0
Q66JY2	IN80D_MOUSE	Ino80d	INO80 complex subunit D		4561.46	7646.35	8731.55	25313.8			6139.97		12.1553	12.9006	13.092	14.6276			12.584	12.2035	12.1553	12.9006	13.092	14.6276	12.1714	12.2107	12.584	Ino80d	0.310586	0.64004	0.193793	2	3	1	0
O88513	GEMI_MOUSE	Gmnn	Geminin	36873.5	39717.8	42557.9	43244.4	44807.6	51484.7	48283.9	57236.1	15.1703	15.2775	15.3771	15.4002	15.4515	15.6519	15.5593	15.8046	15.1703	15.2775	15.3771	15.4002	15.4515	15.6519	15.5593	15.8046	Gmnn	0.310511	0.0145693	1.83656	4	4	1	0
P62876	RPAB5_MOUSE	Polr2l	DNA-directed RNA polymerases I, II, and III subunit RPABC5	26947	21170.6	13436.2	21728.8	26084.4	28494	24808.7	21338	14.7178	14.3698	13.7138	14.4073	14.6709	14.7984	14.5986	14.3811	14.7178	14.3698	13.7138	14.4073	14.6709	14.7984	14.5986	14.3811	Polr2l	0.310049	0.223536	0.650653	4	4	1	0
Q9DCL8	IPP2_MOUSE	Ppp1r2	Protein phosphatase inhibitor 2	101194	87590	157875	81576	116865	157248	149690	97753.5	16.6268	16.4185	17.2684	16.3159	16.8345	17.2627	17.1916	16.5769	16.6268	16.4185	17.2684	16.3159	16.8345	17.2627	17.1916	16.5769	Ppp1r2	0.30903	0.291144	0.535892	4	4	1	0
Q9CRA5	GOLP3_MOUSE	Golph3	Golgi phosphoprotein 3	38664	34164.4	23872.2	36075.4	50471.5	40474.9	35186	37272.2	15.2387	15.0602	14.543	15.1387	15.6232	15.3047	15.1027	15.1858	15.2387	15.0602	14.543	15.1387	15.6232	15.3047	15.1027	15.1858	Golph3	0.308942	0.15974	0.796588	4	4	1	0
O54926	SIVA_MOUSE	Siva1	Apoptosis regulatory protein Siva		7776.84	6054.51			10052.5	10981.1			12.925	12.5638			13.2953	13.4227		12.2035	12.925	12.5638	12.2163	12.0989	13.2953	13.4227	12.3248	Siva1	0.308286	0.44412	0.3525	2	2	1	0
Q61739	ITA6_MOUSE	Itga6	Integrin alpha-6	91913.4	83219.6	101765	75766.8	93105.4	109842	107563	126012	16.488	16.3446	16.6349	16.2093	16.5066	16.7451	16.7148	16.9432	16.488	16.3446	16.6349	16.2093	16.5066	16.7451	16.7148	16.9432	Itga6	0.308222	0.0527504	1.27777	4	4	1	0
Q3UPP8	CEP63_MOUSE	Cep63	Centrosomal protein of 63 kDa	61757.1	59467.1	47109.5	57155.5	55934.6	80291.1	72097.8	71728.4	15.9143	15.8598	15.5237	15.8026	15.7715	16.293	16.1377	16.1303	15.9143	15.8598	15.5237	15.8026	15.7715	16.293	16.1377	16.1303	Cep63	0.307968	0.0708752	1.14951	4	4	1	0
Q9WUK2	IF4H_MOUSE	Eif4h	Eukaryotic translation initiation factor 4H	868476	849761	751738	860758	1022730	1068140	1013650	1012710	19.7281	19.6967	19.5199	19.7152	19.964	20.0267	19.9511	19.9498	19.7281	19.6967	19.5199	19.7152	19.964	20.0267	19.9511	19.9498	Eif4h	0.30791	0.00104257	2.9819	4	4	1	0
Q7TMC8	FCSK_MOUSE	Fcsk	L-fucose kinase	14628.5	15927.9	15172.6	15592.6	16849.6	15756.4	19015.9	25637.4	13.8365	13.9593	13.8892	13.9286	14.0404	13.9437	14.2149	14.646	13.8365	13.9593	13.8892	13.9286	14.0404	13.9437	14.2149	14.646	Fcsk	0.30786	0.0986605	1.00586	4	4	1	0
Q5H8C4	VP13A_MOUSE	Vps13a	Intermembrane lipid transfer protein VPS13A	30010.7	31241.1	30661.8	30855.2	31297.8	35660.8	47776	39050.2	14.8732	14.9312	14.9042	14.9132	14.9338	15.1221	15.544	15.253	14.8732	14.9312	14.9042	14.9132	14.9338	15.1221	15.544	15.253	Vps13a	0.307785	0.0540944	1.26685	4	4	1	0
Q9QXG2	RAE1_MOUSE	Chm	Rab proteins geranylgeranyltransferase component A 1	38866.2	33752.5	38391.8	32796.9	53054.8	44143.6	45760.5	36128	15.2462	15.0427	15.2285	15.0013	15.6952	15.4299	15.4818	15.1408	15.2462	15.0427	15.2285	15.0013	15.6952	15.4299	15.4818	15.1408	Chm	0.30726	0.0564785	1.24812	4	4	1	0
Q8K4E0	ALMS1_MOUSE	Alms1	Centrosome-associated protein ALMS1	6552.75	8931.28	8668.72	11120.6	9536.95	11082.6	10039.1	12451	12.6779	13.1247	13.0816	13.4409	13.2193	13.436	13.2933	13.604	12.6779	13.1247	13.0816	13.4409	13.2193	13.436	13.2933	13.604	Alms1	0.306888	0.135511	0.868027	4	4	1	0
Q6PCM1	KDM3A_MOUSE	Kdm3a	Lysine-specific demethylase 3A	42061.4	59059.1	72001	57212.5	53294.1	73684.1	76217.4	79986.9	15.3602	15.8499	16.1357	15.804	15.7017	16.1691	16.2178	16.2875	15.3602	15.8499	16.1357	15.804	15.7017	16.1691	16.2178	16.2875	Kdm3a	0.306552	0.191391	0.718079	4	4	1	0
Q91WF7	FIG4_MOUSE	Fig4	Polyphosphoinositide phosphatase	85035.4	68018.8	65341.7	78520.1	91838.8	90887.2	99108.2	83882.5	16.3758	16.0536	15.9957	16.2608	16.4868	16.4718	16.5967	16.3561	16.3758	16.0536	15.9957	16.2608	16.4868	16.4718	16.5967	16.3561	Fig4	0.306373	0.0234198	1.63042	4	4	1	0
Q8VHZ7	IMP4_MOUSE	Imp4	U3 small nucleolar ribonucleoprotein protein IMP4	104613	82132.7	150879	105224	125623	111764	150892	150239	16.6747	16.3257	17.203	16.6831	16.9387	16.7701	17.2032	17.1969	16.6747	16.3257	17.203	16.6831	16.9387	16.7701	17.2032	17.1969	Imp4	0.305596	0.194645	0.710757	4	4	1	0
Q9ERL9	GCYA1_MOUSE	Gucy1a1	Guanylate cyclase soluble subunit alpha-1					4571.25		11201.8						12.1584		13.4514		12.2035	12.1943	12.2707	12.2163	12.1584	12.1714	13.4514	12.3248	Gucy1a1	0.305273	0.364345	0.438487	2	0	1	0
E9QLA5	E9QLA5_MOUSE	Inf2	Inverted formin, FH2 and WH2 domain containing	258796	260602	254486	226489	278039	323581	346974	290189	17.9815	17.9915	17.9572	17.7891	18.0849	18.3038	18.4045	18.1466	17.9815	17.9915	17.9572	17.7891	18.0849	18.3038	18.4045	18.1466	Inf2	0.305136	0.0127065	1.89598	4	4	1	0
Q8R1Z9	RN121_MOUSE	Rnf121	E3 ubiquitin ligase Rnf121	38383.5	38344.6	60084.5	22303	37979.1	42680.4	67718.4	41867.4	15.2282	15.2267	15.8747	14.445	15.2129	15.3813	16.0473	15.3535	15.2282	15.2267	15.8747	14.445	15.2129	15.3813	16.0473	15.3535	Rnf121	0.305104	0.412965	0.384087	4	4	1	0
O88532	ZFR_MOUSE	Zfr	Zinc finger RNA-binding protein	76748.1	57313.2	46246.1	59315.5	84854.3	77530.4	53901.2	79282	16.2278	15.8066	15.497	15.8561	16.3727	16.2425	15.718	16.2747	16.2278	15.8066	15.497	15.8561	16.3727	16.2425	15.718	16.2747	Zfr	0.30508	0.196617	0.706378	4	4	1	0
Q8K0D0	CDK17_MOUSE	Cdk17	Cyclin-dependent kinase 17	33622.4	28164	35986.1	26085	31496	26219.7	64419.2	38924.4	15.0371	14.7816	15.1352	14.6709	14.9429	14.6784	15.9752	15.2484	15.0371	14.7816	15.1352	14.6709	14.9429	14.6784	15.9752	15.2484	Cdk17	0.305013	0.348821	0.457398	4	4	1	0
Q99N95	RM03_MOUSE	Mrpl3	Large ribosomal subunit protein uL3m	113834	114402	136106	89062.9	114410	127541	162035	155521	16.7966	16.8038	17.0544	16.4425	16.8039	16.9606	17.3059	17.2467	16.7966	16.8038	17.0544	16.4425	16.8039	16.9606	17.3059	17.2467	Mrpl3	0.30498	0.128421	0.891366	4	4	1	0
P41245	MMP9_MOUSE	Mmp9	Matrix metalloproteinase-9	7693.56	13525.5	13030.5	16016.6	18695.7	12871.9	12133.8	17297.7	12.9094	13.7234	13.6696	13.9673	14.1904	13.6519	13.5667	14.0783	12.9094	13.7234	13.6696	13.9673	14.1904	13.6519	13.5667	14.0783	Mmp9	0.304419	0.312072	0.505745	4	4	1	0
Q9CRB2	NHP2_MOUSE	Nhp2	H/ACA ribonucleoprotein complex subunit 2	20497.5	22339.4	14892.1	21739.7	31124.6	25488.1	22001.5	19702.2	14.3232	14.4473	13.8623	14.408	14.9258	14.6375	14.4253	14.2661	14.3232	14.4473	13.8623	14.408	14.9258	14.6375	14.4253	14.2661	Nhp2	0.30348	0.173482	0.760745	4	4	1	0
Q8K211	COPT1_MOUSE	Slc31a1	High affinity copper uptake protein 1			5372.86	7714.46	6017.62	8307.43		8968.83			12.3915	12.9133	12.555	13.0202		13.1307	12.2035	12.1943	12.3915	12.9133	12.555	13.0202	12.2107	13.1307	Slc31a1	0.303478	0.306999	0.512863	3	2	1	0
F7BE84	F7BE84_MOUSE	Ankrd50	Ankyrin repeat domain 50 (Fragment)	5948.66	5029.51	5206.84	3348.66	4329.09	5397.39	6683.03	7745.74	12.5383	12.2962	12.3462	11.7094	12.0798	12.398	12.7063	12.9192	12.5383	12.2962	12.3462	11.7094	12.0798	12.398	12.7063	12.9192	Ankrd50	0.303314	0.280856	0.551517	4	4	1	0
A0A171EBK8	A0A171EBK8_MOUSE	Rap1gap2	RAP1 GTPase activating protein 2	36248.3	26401.5	31111.9	35782.5	31868.1	38682.5	53142	37691.9	15.1456	14.6883	14.9252	15.127	14.9598	15.2394	15.6976	15.202	15.1456	14.6883	14.9252	15.127	14.9598	15.2394	15.6976	15.202	Rap1gap2	0.303162	0.156804	0.804642	4	4	1	0
Q9WVD4	CLCN5_MOUSE	Clcn5	H(+)/Cl(-) exchange transporter 5	45339.7	58613.2	49011.2	53292.2	63738.7	72330.4	57247.8	60917.8	15.4685	15.8389	15.5808	15.7016	15.9599	16.1423	15.8049	15.8946	15.4685	15.8389	15.5808	15.7016	15.9599	16.1423	15.8049	15.8946	Clcn5	0.302955	0.0298563	1.52496	4	4	1	0
Q9DB91	MED29_MOUSE	Med29	Mediator of RNA polymerase II transcription subunit 29	35859.7	27054.6	31036.5	34722.3	39852.7	38639	39433.5	39866.3	15.1301	14.7236	14.9217	15.0836	15.2824	15.2378	15.2671	15.2829	15.1301	14.7236	14.9217	15.0836	15.2824	15.2378	15.2671	15.2829	Med29	0.302815	0.0170015	1.76951	4	4	1	0
O70589	CSKP_MOUSE	Cask	Peripheral plasma membrane protein CASK	97742.5	73200.8	67839.9	83770	85809.5	182904	81708.2	73407.8	16.5767	16.1596	16.0498	16.3541	16.3888	17.4807	16.3182	16.1636	16.5767	16.1596	16.0498	16.3541	16.3888	17.4807	16.3182	16.1636	Cask	0.302788	0.384446	0.415165	4	4	1	0
Q99JH8	ERD21_MOUSE	Kdelr1	ER lumen protein-retaining receptor 1	2778.42	2800.24	1921.53		2081.41		3835.6	4469.43	11.44	11.4513	10.908		11.0233		11.9052	12.1259	11.44	11.4513	10.908	12.2163	11.0233	12.1714	11.9052	12.1259	Kdelr1	0.302518	0.455665	0.341354	3	3	1	0
Q9JL16	ISG20_MOUSE	Isg20	Interferon-stimulated gene 20 kDa protein	17402.8	19336.4	17580.9	16002.9	15278.4	18096.2	28770.8	27534.3	14.087	14.239	14.1017	13.966	13.8992	14.1434	14.8123	14.7489	14.087	14.239	14.1017	13.966	13.8992	14.1434	14.8123	14.7489	Isg20	0.302509	0.240034	0.619728	4	4	1	0
Q9Z1X9	CDC45_MOUSE	Cdc45	Cell division control protein 45 homolog	40035.4	44636.8	42848.8	40714.2	40771.4	51262.4	51543.4	66942.2	15.289	15.4459	15.387	15.3132	15.3153	15.6456	15.6535	16.0306	15.289	15.4459	15.387	15.3132	15.3153	15.6456	15.6535	16.0306	Cdc45	0.302466	0.091178	1.04011	4	4	1	0
P0CG14	DERPC_MOUSE	Derpc	Decreased expression in renal and prostate cancer protein	14595.3	16396.9	23415.3	10787.9	20425	18761.4	18111.3	20118.9	13.8332	14.0011	14.5152	13.3971	14.318	14.1955	14.1446	14.2963	13.8332	14.0011	14.5152	13.3971	14.318	14.1955	14.1446	14.2963	Derpc	0.301938	0.245662	0.609661	4	4	1	0
P50518	VATE1_MOUSE	Atp6v1e1	V-type proton ATPase subunit E 1	449314	433211	247216	386116	492572	481024	450292	402192	18.7774	18.7247	17.9154	18.5587	18.91	18.8757	18.7805	18.6175	18.7774	18.7247	17.9154	18.5587	18.91	18.8757	18.7805	18.6175	Atp6v1e1	0.301897	0.198627	0.701963	4	4	1	0
P05555	ITAM_MOUSE	Itgam	Integrin alpha-M	413748	424333	399052	437411	575930	524119	494509	473725	18.6584	18.6948	18.6062	18.7386	19.1355	18.9995	18.9156	18.8537	18.6584	18.6948	18.6062	18.7386	19.1355	18.9995	18.9156	18.8537	Itgam	0.30158	0.00413318	2.38372	4	4	1	0
Q9EQ61	PESC_MOUSE	Pes1	Pescadillo homolog	77514.1	86305.3	70200.7	57981.2	76171.5	93234.1	87073.1	101603	16.2422	16.3972	16.0992	15.8233	16.217	16.5086	16.4099	16.6326	16.2422	16.3972	16.0992	15.8233	16.217	16.5086	16.4099	16.6326	Pes1	0.301557	0.0915566	1.03831	4	4	1	0
Q922B2	SYDC_MOUSE	Dars1	Aspartate--tRNA ligase, cytoplasmic	566620	540581	575439	579223	784018	675446	673682	660148	19.112	19.0442	19.1343	19.1438	19.5805	19.3655	19.3617	19.3324	19.112	19.0442	19.1343	19.1438	19.5805	19.3655	19.3617	19.3324	Dars1	0.301478	0.00271789	2.56577	4	4	1	0
Q9CPX9	APC11_MOUSE	Anapc11	Anaphase-promoting complex subunit 11	1893.74		2170.91	1585.02		1428.65		2371.4	10.887		11.0841	10.6303		10.4804		11.2115	10.887	12.1943	11.0841	10.6303	12.0989	10.4804	12.2107	11.2115	Anapc11	0.301467	0.592282	0.227472	2	3	1	0
Q60634	FLOT2_MOUSE	Flot2	Flotillin-2	86429.9	129345	107286	133613	145607	151857	119559	139678	16.3992	16.9809	16.7111	17.0277	17.1517	17.2124	16.8674	17.0917	16.3992	16.9809	16.7111	17.0277	17.1517	17.2124	16.8674	17.0917	Flot2	0.301068	0.114536	0.941057	4	4	1	0
P57716	NICA_MOUSE	Ncstn	Nicastrin	51408.3	43820.3	36156.2	49368.9	55364.2	60990.2	49993	54835.7	15.6497	15.4193	15.142	15.5913	15.7567	15.8963	15.6094	15.7428	15.6497	15.4193	15.142	15.5913	15.7567	15.8963	15.6094	15.7428	Ncstn	0.300732	0.0572525	1.24221	4	4	1	0
Q9Z2I0	LETM1_MOUSE	Letm1	Mitochondrial proton/calcium exchanger protein	130860	118187	103989	123152	134063	152650	137548	161872	16.9977	16.8507	16.6661	16.9101	17.0326	17.2199	17.0696	17.3045	16.9977	16.8507	16.6661	16.9101	17.0326	17.2199	17.0696	17.3045	Letm1	0.30049	0.0193566	1.71317	4	4	1	0
Q8VHK9	DHX36_MOUSE	Dhx36	ATP-dependent DNA/RNA helicase DHX36	82880.3	82138.8	85011.8	86528.4	84343.3	99932.6	117545	116239	16.3387	16.3258	16.3754	16.4009	16.364	16.6087	16.8429	16.8267	16.3387	16.3258	16.3754	16.4009	16.364	16.6087	16.8429	16.8267	Dhx36	0.300366	0.0384041	1.41562	4	4	1	0
Q9CYI4	LUC7L_MOUSE	Luc7l	Putative RNA-binding protein Luc7-like 1	342436	312389	308211	341627	337968	370353	433566	477018	18.3855	18.253	18.2336	18.3821	18.3665	18.4985	18.7259	18.8637	18.3855	18.253	18.2336	18.3821	18.3665	18.4985	18.7259	18.8637	Luc7l	0.300141	0.0448984	1.34777	4	4	1	0
Q9Z238	CCNE2_MOUSE	Ccne2	G1/S-specific cyclin-E2	19177.4	20401.7	26900.3	17023.3	19459.6	23066.5	28675.2	31990.5	14.2271	14.3164	14.7153	14.0552	14.2482	14.4935	14.8075	14.9654	14.2271	14.3164	14.7153	14.0552	14.2482	14.4935	14.8075	14.9654	Ccne2	0.300125	0.208007	0.681923	4	4	1	0
Q922M7	ASHWN_MOUSE		Ashwin	7115.57	10735.8	11272.1	7224.03	9829.34	9051.82	10646.2	15070.2	12.7968	13.3901	13.4605	12.8186	13.2629	13.144	13.3781	13.8794	12.7968	13.3901	13.4605	12.8186	13.2629	13.144	13.3781	13.8794		0.299593	0.260449	0.584278	4	4	1	0
P00375	DYR_MOUSE	Dhfr	Dihydrofolate reductase	103313	89670.6	94751.4	56922.5	96663.4	112394	127094	83028.6	16.6567	16.4523	16.5319	15.7967	16.5607	16.7782	16.9555	16.3413	16.6567	16.4523	16.5319	15.7967	16.5607	16.7782	16.9555	16.3413	Dhfr	0.299541	0.247462	0.606491	4	4	1	0
P15626	GSTM2_MOUSE	Gstm2	Glutathione S-transferase Mu 2		22601.4	17361			18501.3	15072.8	16510		14.4641	14.0836			14.1753	13.8797	14.0111	12.2035	14.4641	14.0836	12.2163	12.0989	14.1753	13.8797	14.0111	Gstm2	0.29936	0.711533	0.147805	3	2	1	0
Q61037	TSC2_MOUSE	Tsc2	Tuberin	39936.2	20565.8	15888.4	31842.3	26973.9	34023.5	30201.7	34372.5	15.2854	14.328	13.9557	14.9587	14.7193	15.0542	14.8823	15.069	15.2854	14.328	13.9557	14.9587	14.7193	15.0542	14.8823	15.069	Tsc2	0.299279	0.37387	0.427279	4	4	1	0
Q80WQ9	ZBED4_MOUSE	Zbed4	Zinc finger BED domain-containing protein 4	7907.48	9347.05	14475.6	8991.05	8876.59	12487.2	18080.1	11003.3	12.949	13.1903	13.8213	13.1343	13.1158	13.6082	14.1421	13.4256	12.949	13.1903	13.8213	13.1343	13.1158	13.6082	14.1421	13.4256	Zbed4	0.299202	0.337161	0.472163	4	4	1	0
Q99JN2	KLH22_MOUSE	Klhl22	Kelch-like protein 22	17472.9	13927.7		18175.3	13391.7	14725.3	14885.5	17056.3	14.0928	13.7657		14.1497	13.7091	13.846	13.8616	14.058	14.0928	13.7657	12.2707	14.1497	13.7091	13.846	13.8616	14.058	Klhl22	0.298942	0.528512	0.276945	4	3	1	0
Q3TWL2	PP4P1_MOUSE	Pip4p1	Type 1 phosphatidylinositol 4,5-bisphosphate 4-phosphatase	16793.7	15622.3	13590	16634.6	21853	18668.8	15781.9	21096	14.0356	13.9313	13.7303	14.0219	14.4155	14.1883	13.946	14.3647	14.0356	13.9313	13.7303	14.0219	14.4155	14.1883	13.946	14.3647	Pip4p1	0.29886	0.0572383	1.24231	4	4	1	0
A2ASZ8	SCMC2_MOUSE	Slc25a25	Mitochondrial adenyl nucleotide antiporter SLC25A25	24026.4	14793.3	17757.8	13610.2	26329.7	25635.1	19709.9	14781.6	14.5523	13.8527	14.1162	13.7324	14.6844	14.6458	14.2666	13.8515	14.5523	13.8527	14.1162	13.7324	14.6844	14.6458	14.2666	13.8515	Slc25a25	0.298707	0.304613	0.516252	4	4	1	0
O88845	AKA10_MOUSE	Akap10	A-kinase anchor protein 10, mitochondrial	66104.1	89006.1	76369.4	80530.6	94133.2	90591.9	115237	84262.7	16.0125	16.4416	16.2207	16.2972	16.5224	16.4671	16.8142	16.3626	16.0125	16.4416	16.2207	16.2972	16.5224	16.4671	16.8142	16.3626	Akap10	0.298584	0.0640103	1.19375	4	4	1	0
Q6ZQA0	NBEL2_MOUSE	Nbeal2	Neurobeachin-like protein 2	199738	178000	88458.4	157358	166698	184784	170395	215652	17.6077	17.4415	16.4327	17.2637	17.3469	17.4955	17.3785	17.7183	17.6077	17.4415	16.4327	17.2637	17.3469	17.4955	17.3785	17.7183	Nbeal2	0.298389	0.318117	0.497413	4	4	1	0
Q9D3P8	PLRKT_MOUSE	Plgrkt	Plasminogen receptor (KT)	133761	135038	94760.7	120988	132792	168828	137893	153202	17.0293	17.043	16.532	16.8845	17.0188	17.3652	17.0732	17.2251	17.0293	17.043	16.532	16.8845	17.0188	17.3652	17.0732	17.2251	Plgrkt	0.298365	0.0808971	1.09207	4	4	1	0
Q9DC61	MPPA_MOUSE	Pmpca	Mitochondrial-processing peptidase subunit alpha	253232	237007	223293	216442	260539	266119	372711	256108	17.9501	17.8546	17.7686	17.7236	17.9911	18.0217	18.5077	17.9664	17.9501	17.8546	17.7686	17.7236	17.9911	18.0217	18.5077	17.9664	Pmpca	0.297518	0.0752766	1.12334	4	4	1	0
P62309	RUXG_MOUSE	Snrpg	Small nuclear ribonucleoprotein G	4471720	4054530	3822140	4231190	5980910	4522820	4508820	5484570	22.0924	21.9511	21.8659	22.0126	22.5119	22.1088	22.1043	22.3869	22.0924	21.9511	21.8659	22.0126	22.5119	22.1088	22.1043	22.3869	Snrpg	0.297477	0.0387943	1.41123	4	4	1	0
Q02819	NUCB1_MOUSE	Nucb1	Nucleobindin-1	481389	410388	356709	476215	453758	558386	474254	637106	18.8768	18.6466	18.4444	18.8613	18.7916	19.0909	18.8553	19.2812	18.8768	18.6466	18.4444	18.8613	18.7916	19.0909	18.8553	19.2812	Nucb1	0.297457	0.0979257	1.0091	4	4	1	0
Q99LC8	EI2BA_MOUSE	Eif2b1	Translation initiation factor eIF2B subunit alpha	106358	100826	103951	79795.1	122625	111823	100171	147687	16.6986	16.6215	16.6655	16.284	16.9039	16.7709	16.6121	17.1722	16.6986	16.6215	16.6655	16.284	16.9039	16.7709	16.6121	17.1722	Eif2b1	0.297351	0.098932	1.00466	4	4	1	0
F8VQ54	F8VQ54_MOUSE	Dicer1	Endoribonuclease Dicer	44782.7	28301.6	29393.8	38993.2	53126.4	38643.8	44427.9	36282.3	15.4507	14.7886	14.8432	15.2509	15.6971	15.2379	15.4392	15.147	15.4507	14.7886	14.8432	15.2509	15.6971	15.2379	15.4392	15.147	Dicer1	0.29696	0.19054	0.720014	4	4	1	0
Q63961	EGLN_MOUSE	Eng	Endoglin	7715.8	9075.83	14867.7	11048.7	8041.77	7852.12	19529.8	21237.4	12.9136	13.1478	13.8599	13.4316	12.9733	12.9389	14.2534	14.3743	12.9136	13.1478	13.8599	13.4316	12.9733	12.9389	14.2534	14.3743	Eng	0.296744	0.527357	0.277895	4	4	1	0
Q9QXV1	CBX8_MOUSE	Cbx8	Chromobox protein homolog 8	27108.2	16728.8		21592	38244.9	16898.2	11467.8	14848.5	14.7264	14.03		14.3982	15.223	14.0446	13.4853	13.858	14.7264	14.03	12.2707	14.3982	15.223	14.0446	13.4853	13.858	Cbx8	0.296365	0.670832	0.173386	4	3	1	0
Q8BYH3	TRM13_MOUSE	Trmt13	tRNA:m(4)X modification enzyme TRM13 homolog		2688.92	4547.15	3967.02	4275.58	4828.99	4911.91			11.3928	12.1507	11.9538	12.0619	12.2375	12.2621		12.2035	11.3928	12.1507	11.9538	12.0619	12.2375	12.2621	12.3248	Trmt13	0.296347	0.177075	0.751843	3	3	1	0
Q9EQJ0	TPC1_MOUSE	Tpcn1	Two pore calcium channel protein 1	11550.1	14636.2	14774.7	13011.8	16249.3	20084.7	16835.8	13434.1	13.4956	13.8373	13.8508	13.6675	13.9881	14.2938	14.0392	13.7136	13.4956	13.8373	13.8508	13.6675	13.9881	14.2938	14.0392	13.7136	Tpcn1	0.295878	0.0879584	1.05572	4	4	1	0
Q07797	LG3BP_MOUSE	Lgals3bp	Galectin-3-binding protein	219031	199315	162398	249137	232813	213836	250397	321575	17.7408	17.6047	17.3092	17.9266	17.8288	17.7061	17.9339	18.2948	17.7408	17.6047	17.3092	17.9266	17.8288	17.7061	17.9339	18.2948	Lgals3bp	0.295598	0.154742	0.810393	4	4	1	0
P18155	MTDC_MOUSE	Mthfd2	Bifunctional methylenetetrahydrofolate dehydrogenase/cyclohydrolase, mitochondrial	34220.3	27940	34672.6	31051.8	32040.5	41419.5	36265.8	48503.5	15.0626	14.77	15.0815	14.9224	14.9676	15.338	15.1463	15.5658	15.0626	14.77	15.0815	14.9224	14.9676	15.338	15.1463	15.5658	Mthfd2	0.295312	0.0919584	1.03641	4	4	1	0
P67871	CSK2B_MOUSE	Csnk2b	Casein kinase II subunit beta	513499	470155	565301	430499	549370	556213	632651	689103	18.97	18.8428	19.1087	18.7157	19.0674	19.0853	19.2711	19.3944	18.97	18.8428	19.1087	18.7157	19.0674	19.0853	19.2711	19.3944	Csnk2b	0.295255	0.0425443	1.37116	4	4	1	0
Q3U3D7	T131L_MOUSE	Tmem131l	Transmembrane protein 131-like	8053.49	10059.8	11295.3	7352.41	10076.2	8795.04	12212.1	14089.6	12.9754	13.2963	13.4634	12.844	13.2987	13.1025	13.576	13.7823	12.9754	13.2963	13.4634	12.844	13.2987	13.1025	13.576	13.7823	Tmem131l	0.295089	0.203528	0.691375	4	4	1	0
Q8R2S9	ARP8_MOUSE	Actr8	Actin-related protein 8	27348.6	31692	25423.6	32116.3	35717.2	29020.6	39129.6	39530.5	14.7392	14.9518	14.6339	14.971	15.1243	14.8248	15.256	15.2707	14.7392	14.9518	14.6339	14.971	15.1243	14.8248	15.256	15.2707	Actr8	0.294966	0.0671192	1.17315	4	4	1	0
Q8VEL2	MTMRE_MOUSE	Mtmr14	Phosphatidylinositol-3,5-bisphosphate 3-phosphatase MTMR14	51791.1	48617.1	55261.6	55542.3	63671.4	62898.3	66990.4	65219.1	15.6604	15.5692	15.754	15.7613	15.9584	15.9407	16.0317	15.993	15.6604	15.5692	15.754	15.7613	15.9584	15.9407	16.0317	15.993	Mtmr14	0.294721	0.0010076	2.99671	4	4	1	0
Q9JKR6	HYOU1_MOUSE	Hyou1	Hypoxia up-regulated protein 1	795380	803416	817795	782238	1011600	999658	937756	975912	19.6013	19.6158	19.6414	19.5772	19.9482	19.9311	19.8389	19.8964	19.6013	19.6158	19.6414	19.5772	19.9482	19.9311	19.8389	19.8964	Hyou1	0.294707	3.99267e-05	4.39874	4	4	1	0
E9PWW6	E9PWW6_MOUSE	Zc3h7a	Zinc finger CCCH type containing 7 A	44891.9	39804.2	49025.3	40795.3	45171.3	55861.7	58789.7	54533.5	15.4542	15.2806	15.5812	15.3161	15.4631	15.7696	15.8433	15.7349	15.4542	15.2806	15.5812	15.3161	15.4631	15.7696	15.8433	15.7349	Zc3h7a	0.294667	0.0340405	1.468	4	4	1	0
Q78ZA7	NP1L4_MOUSE	Nap1l4	Nucleosome assembly protein 1-like 4	1626910	1342510	1386460	1715170	1858220	2028630	1445420	2155800	20.6337	20.3565	20.403	20.7099	20.8255	20.9521	20.4631	21.0398	20.6337	20.3565	20.403	20.7099	20.8255	20.9521	20.4631	21.0398	Nap1l4	0.294329	0.103503	0.985049	4	4	1	0
A0A1Y7VMY2	A0A1Y7VMY2_MOUSE	Med10	Mediator of RNA polymerase II transcription subunit 10	46841.7	72658.3	74041.1	66246.7	76224.2	76258.7	94597.6	68606.5	15.5155	16.1488	16.176	16.0156	16.218	16.2186	16.5295	16.0661	15.5155	16.1488	16.176	16.0156	16.218	16.2186	16.5295	16.0661	Med10	0.294051	0.156925	0.804307	4	4	1	0
Q99PG4	RGS18_MOUSE	Rgs18	Regulator of G-protein signaling 18	116264	107392	131561	110668	105944	138734	167344	166917	16.827	16.7125	17.0054	16.7559	16.6929	17.082	17.3525	17.3488	16.827	16.7125	17.0054	16.7559	16.6929	17.082	17.3525	17.3488	Rgs18	0.293828	0.131564	0.880863	4	4	1	0
Q9DBQ7	PACE1_MOUSE	Scyl3	Protein-associating with the carboxyl-terminal domain of ezrin	113543	145244	131124	131014	111883	174012	195700	167907	16.7929	17.1481	17.0006	16.9994	16.7716	17.4088	17.5783	17.3573	16.7929	17.1481	17.0006	16.9994	16.7716	17.4088	17.5783	17.3573	Scyl3	0.293778	0.17333	0.761125	4	4	1	0
A0AAA9WW07	A0AAA9WW07_MOUSE	Akap17a	A-kinase anchor protein 17A	139725	133343	117973	127672	173446	150664	173948	139139	17.0922	17.0248	16.8481	16.9621	17.4041	17.201	17.4083	17.0862	17.0922	17.0248	16.8481	16.9621	17.4041	17.201	17.4083	17.0862	Akap17a	0.293093	0.021358	1.67044	4	4	1	0
Q9D0K1	PEX13_MOUSE	Pex13	Peroxisomal membrane protein PEX13	37102.5	24071.4	36954.3	43776.2	39009.6	40656.4	43108.1	47605.3	15.1792	14.555	15.1735	15.4179	15.2515	15.3112	15.3957	15.5388	15.1792	14.555	15.1735	15.4179	15.2515	15.3112	15.3957	15.5388	Pex13	0.292917	0.183164	0.73716	4	4	1	0
P58468	SLX9_MOUSE	Slx9	Ribosome biogenesis protein SLX9 homolog	32611.7	24183	28261.7	33195.7	32991.3	37577.9	36817.8	36469.7	14.9931	14.5617	14.7866	15.0187	15.0098	15.1976	15.1681	15.1544	14.9931	14.5617	14.7866	15.0187	15.0098	15.1976	15.1681	15.1544	Slx9	0.292461	0.0429588	1.36695	4	4	1	0
Q6GQV7	EDRF1_MOUSE	Edrf1	Erythroid differentiation-related factor 1	25310.1	24891.3	23081.4	22557.8	30098.9	28318.6	25865.8	33452.5	14.6274	14.6034	14.4944	14.4613	14.8774	14.7895	14.6588	15.0298	14.6274	14.6034	14.4944	14.4613	14.8774	14.7895	14.6588	15.0298	Edrf1	0.292227	0.0158642	1.79958	4	4	1	0
Q8C1Y8	CCZ1_MOUSE	Ccz1	Vacuolar fusion protein CCZ1 homolog	108292	124632	115447	88197.8	123878	141885	143905	122134	16.7246	16.9273	16.8169	16.4285	16.9186	17.1144	17.1348	16.8981	16.7246	16.9273	16.8169	16.4285	16.9186	17.1144	17.1348	16.8981	Ccz1	0.292144	0.0565766	1.24736	4	4	1	0
Q9D0R9	WDR89_MOUSE	Wdr89	WD repeat-containing protein 89	30654.9	27608.3	30743.3	32299.5	29666.6	33336.4	37357.6	51131.7	14.9038	14.7528	14.908	14.9792	14.8566	15.0248	15.1891	15.6419	14.9038	14.7528	14.908	14.9792	14.8566	15.0248	15.1891	15.6419	Wdr89	0.292139	0.146945	0.832845	4	4	1	0
Q8VCY6	UTP6_MOUSE	Utp6	U3 small nucleolar RNA-associated protein 6 homolog	35235.6	31113.5	36043.8	38702.9	40182.2	42183.7	41934.2	48361.9	15.1047	14.9253	15.1375	15.2402	15.2943	15.3644	15.3558	15.5616	15.1047	14.9253	15.1375	15.2402	15.2943	15.3644	15.3558	15.5616	Utp6	0.292118	0.0156688	1.80496	4	4	1	0
Q6PDQ2	CHD4_MOUSE	Chd4	Chromodomain-helicase-DNA-binding protein 4	801835	752296	952386	569330	652177	1081570	1234200	843576	19.6129	19.5209	19.8612	19.1189	19.3149	20.0447	20.2351	19.6862	19.6129	19.5209	19.8612	19.1189	19.3149	20.0447	20.2351	19.6862	Chd4	0.291731	0.296525	0.527939	4	4	1	0
Q8VE62	PAIP1_MOUSE	Paip1	Polyadenylate-binding protein-interacting protein 1	78763.7	86356.3	52404.4	82419.1	83549.4	92641.2	83239.5	102348	16.2652	16.398	15.6774	16.3307	16.3503	16.4994	16.345	16.6431	16.2652	16.398	15.6774	16.3307	16.3503	16.4994	16.345	16.6431	Paip1	0.291616	0.156813	0.804618	4	4	1	0
Q8BLX4	FUCT1_MOUSE	Slc35c1	GDP-fucose transporter 1	27563.3	29132.6	32318.4	31684.3	38745.6	32778.6	38259	37980.2	14.7505	14.8303	14.9801	14.9515	15.2417	15.0005	15.2235	15.213	14.7505	14.8303	14.9801	14.9515	15.2417	15.0005	15.2235	15.213	Slc35c1	0.291582	0.00962627	2.01654	4	4	1	0
Q9JHF5	Q9JHF5_MOUSE	Tcirg1	V-type proton ATPase subunit a	333960	229578	126540	194048	334709	280363	249598	180378	18.3493	17.8086	16.9492	17.5661	18.3525	18.0969	17.9292	17.4607	18.3493	17.8086	16.9492	17.5661	18.3525	18.0969	17.9292	17.4607	Tcirg1	0.291542	0.431372	0.365148	4	4	1	0
E9Q5B5	E9Q5B5_MOUSE	Hk2	Hexokinase-2	9397.99	9493.43		8869.42	9584.15	11884	15015		13.1981	13.2127		13.1146	13.2264	13.5367	13.8741		13.1981	13.2127	12.2707	13.1146	13.2264	13.5367	13.8741	12.3248	Hk2	0.291476	0.496525	0.304059	3	3	1	0
A3KGF7	PLCB2_MOUSE	Plcb2	1-phosphatidylinositol 4,5-bisphosphate phosphodiesterase beta-2	54123.8	53759.2	81883.5	40273.5	58323.5	67353.8	80773	67761.5	15.724	15.7142	16.3213	15.2975	15.8318	16.0395	16.3016	16.0482	15.724	15.7142	16.3213	15.2975	15.8318	16.0395	16.3016	16.0482	Plcb2	0.290999	0.255476	0.59265	4	4	1	0
Q61598	GDIB_MOUSE	Gdi2	Rab GDP dissociation inhibitor beta	812250	942809	1196990	997370	879485	871580	1696820	1574360	19.6316	19.8466	20.191	19.9278	19.7463	19.7333	20.6944	20.5863	19.6316	19.8466	20.191	19.9278	19.7463	19.7333	20.6944	20.5863	Gdi2	0.290847	0.347453	0.459104	4	4	1	0
Q9JJ66	CDC20_MOUSE	Cdc20	Cell division cycle protein 20 homolog	63574.7	48317.2	62776.3	46713.1	67083.2	75439.5	69770.3	57129.1	15.9562	15.5602	15.9379	15.5115	16.0337	16.203	16.0903	15.8019	15.9562	15.5602	15.9379	15.5115	16.0337	16.203	16.0903	15.8019	Cdc20	0.290768	0.0936106	1.02867	4	4	1	0
O70585	DTNB_MOUSE	Dtnb	Dystrobrevin beta	3678.81	4486.45	7339.49	2805.33		4939.73	6961.43	5043.06	11.845	12.1314	12.8415	11.454		12.2702	12.7652	12.3001	11.845	12.1314	12.8415	11.454	12.0989	12.2702	12.7652	12.3001	Dtnb	0.290645	0.406565	0.39087	3	4	1	0
Q8BJZ3	LFG3_MOUSE	Tmbim1	Protein lifeguard 3	38693.3	28372.4	28380	33819.2	34281.7	46108.6	41401.9	36021.9	15.2398	14.7922	14.7926	15.0456	15.0652	15.4927	15.3374	15.1366	15.2398	14.7922	14.7926	15.0456	15.0652	15.4927	15.3374	15.1366	Tmbim1	0.290439	0.0933582	1.02985	4	4	1	0
G3UVU2	G3UVU2_MOUSE	Sf3a2	Splicing factor 3a, subunit 2	621335	524044	678036	504675	564042	722431	744376	820784	19.245	18.9993	19.371	18.945	19.1054	19.4625	19.5057	19.6466	19.245	18.9993	19.371	18.945	19.1054	19.4625	19.5057	19.6466	Sf3a2	0.28998	0.10704	0.970454	4	4	1	0
Q9D4H1	EXOC2_MOUSE	Exoc2	Exocyst complex component 2	115755	112241	128089	106488	127804	129786	151126	157958	16.8207	16.7762	16.9668	16.7003	16.9636	16.9858	17.2054	17.2692	16.8207	16.7762	16.9668	16.7003	16.9636	16.9858	17.2054	17.2692	Exoc2	0.289962	0.0227181	1.64363	4	4	1	0
Q99MI1	RB6I2_MOUSE	Erc1	ELKS/Rab6-interacting/CAST family member 1	22329.7		16978.1		16360.4	12298.2	18296.7		14.4467		14.0514		13.9979	13.5862	14.1593		14.4467	12.1943	14.0514	12.2163	13.9979	13.5862	14.1593	12.3248	Erc1	0.289875	0.703515	0.152726	3	2	1	0
Q4LDD4	ARAP1_MOUSE	Arap1	Arf-GAP with Rho-GAP domain, ANK repeat and PH domain-containing protein 1	129432	103175	115949	109280	142450	125754	137828	152980	16.9818	16.6547	16.8231	16.7377	17.1201	16.9402	17.0725	17.223	16.9818	16.6547	16.8231	16.7377	17.1201	16.9402	17.0725	17.223	Arap1	0.289616	0.0192182	1.71629	4	4	1	0
P97868	RBBP6_MOUSE	Rbbp6	E3 ubiquitin-protein ligase RBBP6	89824	108794	116681	107140	106382	130060	145724	135190	16.4548	16.7312	16.8322	16.7091	16.6989	16.9888	17.1529	17.0446	16.4548	16.7312	16.8322	16.7091	16.6989	16.9888	17.1529	17.0446	Rbbp6	0.289455	0.0611708	1.21346	4	4	1	0
Q9D1L9	LTOR5_MOUSE	Lamtor5	Ragulator complex protein LAMTOR5	59938.3	53108.4	72636.6	84888.4	60904.5	79525.2	94343.4	95816.9	15.8712	15.6967	16.1484	16.3733	15.8943	16.2791	16.5256	16.548	15.8712	15.6967	16.1484	16.3733	15.8943	16.2791	16.5256	16.548	Lamtor5	0.28937	0.223317	0.651078	4	4	1	0
A0A3B2W3F6	A0A3B2W3F6_MOUSE	Ift140	Intraflagellar transport 140	11414.3	8606.6	8515.36	11351.3	10278.2	11617.6	15945.5	11123.5	13.4786	13.0712	13.0559	13.4706	13.3273	13.504	13.9609	13.4413	13.4786	13.0712	13.0559	13.4706	13.3273	13.504	13.9609	13.4413	Ift140	0.289326	0.164632	0.783486	4	4	1	0
Q3UD82	PARP8_MOUSE	Parp8	Protein mono-ADP-ribosyltransferase PARP8	23562.9	28950.6	33256.8	25497	27293.3	35558	42099.7	31540.8	14.5242	14.8213	15.0214	14.638	14.7363	15.1179	15.3615	14.9449	14.5242	14.8213	15.0214	14.638	14.7363	15.1179	15.3615	14.9449	Parp8	0.288916	0.143047	0.844521	4	4	1	0
P09450	JUNB_MOUSE	Junb	Transcription factor JunB	32383	29000.5	27812.7	28907.8	44239.2	30398.8	39495.4	31654.3	14.9829	14.8238	14.7635	14.8192	15.433	14.8917	15.2694	14.9501	14.9829	14.8238	14.7635	14.8192	15.433	14.8917	15.2694	14.9501	Junb	0.288727	0.0805727	1.09381	4	4	1	0
E9QNP0	E9QNP0_MOUSE	Kxd1	KxDL motif-containing protein 1	172745	174879	256258	125226	250398	229383	242888	154695	17.3983	17.416	17.9672	16.9342	17.9339	17.8074	17.8899	17.2391	17.3983	17.416	17.9672	16.9342	17.9339	17.8074	17.8899	17.2391	Kxd1	0.288642	0.319563	0.495444	4	4	1	0
Q61102	ABCB7_MOUSE	Abcb7	Iron-sulfur clusters transporter ABCB7, mitochondrial	268606	268926	195491	282919	277250	311600	318613	323059	18.0351	18.0368	17.5767	18.11	18.0808	18.2493	18.2814	18.3014	18.0351	18.0368	17.5767	18.11	18.0808	18.2493	18.2814	18.3014	Abcb7	0.288573	0.0717461	1.1442	4	4	1	0
Q91ZV7	PLDX1_MOUSE	Plxdc1	Plexin domain-containing protein 1	88533	65404.6	77153.9	82493.2	110972	86879.5	94576.5	89943.5	16.4339	15.9971	16.2355	16.332	16.7598	16.4067	16.5292	16.4567	16.4339	15.9971	16.2355	16.332	16.7598	16.4067	16.5292	16.4567	Plxdc1	0.288505	0.0555309	1.25547	4	4	1	0
Q8JZR0	ACSL5_MOUSE	Acsl5	Long-chain-fatty-acid--CoA ligase 5	86345.3	82323.1	73029.3	77999.8	77389.5	91156.2	110844	115019	16.3978	16.329	16.1562	16.2512	16.2399	16.4761	16.7582	16.8115	16.3978	16.329	16.1562	16.2512	16.2399	16.4761	16.7582	16.8115	Acsl5	0.287844	0.090047	1.04553	4	4	1	0
P41234	ABCA2_MOUSE	Abca2	ATP-binding cassette sub-family A member 2	26594.5		24507.4	32670.5	22072.6	19279.2	21304.7	24441.7	14.6988		14.5809	14.9957	14.43	14.2348	14.3789	14.5771	14.6988	12.1943	14.5809	14.9957	14.43	14.2348	14.3789	14.5771	Abca2	0.287716	0.673907	0.1714	4	3	1	0
Q8BG15	CTSL2_MOUSE	Ctdspl2	CTD small phosphatase-like protein 2	118483	108118	101581	88863.7	108122	168079	128233	110156	16.8543	16.7222	16.6323	16.4393	16.7223	17.3588	16.9684	16.7492	16.8543	16.7222	16.6323	16.4393	16.7223	17.3588	16.9684	16.7492	Ctdspl2	0.287633	0.14346	0.843268	4	4	1	0
Q9WVF7	DPOE1_MOUSE	Pole	DNA polymerase epsilon catalytic subunit A	59536.1	69837.8	77856	73646.3	76713.5	88682.9	80283.1	96748	15.8615	16.0917	16.2485	16.1683	16.2272	16.4364	16.2928	16.5619	15.8615	16.0917	16.2485	16.1683	16.2272	16.4364	16.2928	16.5619	Pole	0.287068	0.0428124	1.36843	4	4	1	0
Q91W61	FXL15_MOUSE	Fbxl15	F-box/LRR-repeat protein 15	23622.9	17849.2	17273.8	16421.6	17226.8	23451.1	25248.1	25990.1	14.5279	14.1236	14.0763	14.0033	14.0724	14.5174	14.6239	14.6657	14.5279	14.1236	14.0763	14.0033	14.0724	14.5174	14.6239	14.6657	Fbxl15	0.287055	0.161735	0.791195	4	4	1	0
Q9D1C9	RRP7A_MOUSE	Rrp7a	Ribosomal RNA-processing protein 7 homolog A	66449.6	69525.1	66652.6	76350.4	82659.7	83886.3	80824.9	92959.6	16.02	16.0852	16.0244	16.2203	16.3349	16.3561	16.3025	16.5043	16.02	16.0852	16.0244	16.2203	16.3349	16.3561	16.3025	16.5043	Rrp7a	0.286983	0.00437685	2.35884	4	4	1	0
O55057	PDE6D_MOUSE	Pde6d	Retinal rod rhodopsin-sensitive cGMP 3',5'-cyclic phosphodiesterase subunit delta	31444.8	27390.5	25131.7	27555.8	41057.5	33765.3	25952.4	36731.1	14.9405	14.7414	14.6172	14.7501	15.3254	15.0433	14.6636	15.1647	14.9405	14.7414	14.6172	14.7501	15.3254	15.0433	14.6636	15.1647	Pde6d	0.286924	0.115354	0.937969	4	4	1	0
F8VQK5	F8VQK5_MOUSE	Sash1	SAM and SH3 domain containing 1	9738.61	10013.9		12000.5	7544.69	11325.9	11181	13400.3	13.2495	13.2897		13.5508	12.8812	13.4673	13.4488	13.71	13.2495	13.2897	12.2707	13.5508	12.8812	13.4673	13.4488	13.71	Sash1	0.286641	0.420455	0.376281	4	3	1	0
Q921W2	Q921W2_MOUSE	Tial1	Tia1 cytotoxic granule-associated RNA binding protein-like 1	11349.5	11898.9	13160.4	12019.1	9193.76	18584	14124.3	19595.4	13.4703	13.5385	13.6839	13.553	13.1664	14.1818	13.7859	14.2582	13.4703	13.5385	13.6839	13.553	13.1664	14.1818	13.7859	14.2582	Tial1	0.286623	0.301592	0.520581	4	4	1	0
Q6IRU7	CEP78_MOUSE	Cep78	Centrosomal protein of 78 kDa	10965.3	11738.6	9867.65	14751.5	14236	13797.2	15136.6	13949.1	13.4207	13.519	13.2685	13.8486	13.7973	13.7521	13.8858	13.7679	13.4207	13.519	13.2685	13.8486	13.7973	13.7521	13.8858	13.7679	Cep78	0.286572	0.0638702	1.1947	4	4	1	0
O88693	CEGT_MOUSE	Ugcg	Ceramide glucosyltransferase	2272.79	3708.88	2541.42			2636.93		4113.02	11.1502	11.8568	11.3114			11.3646		12.006	11.1502	11.8568	11.3114	12.2163	12.0989	11.3646	12.2107	12.006	Ugcg	0.286378	0.392366	0.406308	2	3	1	0
O88544	CSN4_MOUSE	Cops4	COP9 signalosome complex subunit 4	195921	212954	198684	178611	236944	227314	256502	237065	17.5799	17.7002	17.6001	17.4465	17.8542	17.7943	17.9686	17.8549	17.5799	17.7002	17.6001	17.4465	17.8542	17.7943	17.9686	17.8549	Cops4	0.286344	0.00410264	2.38694	4	4	1	0
Q8CEC6	PPWD1_MOUSE	Ppwd1	Peptidylprolyl isomerase domain and WD repeat-containing protein 1	89588.1	95423.5	98335.8	87275.4	92088.8	111053	119041	133303	16.451	16.5421	16.5854	16.4133	16.4907	16.7609	16.8611	17.0243	16.451	16.5421	16.5854	16.4133	16.4907	16.7609	16.8611	17.0243	Ppwd1	0.286321	0.0524927	1.2799	4	4	1	0
Q9ESN5	CENPK_MOUSE	Cenpk	Centromere protein K	30886.9	30217.4	26221.4	33262	40128.4	37449.6	35945.3	33322	14.9147	14.8831	14.6785	15.0216	15.2923	15.1927	15.1335	15.0242	14.9147	14.8831	14.6785	15.0216	15.2923	15.1927	15.1335	15.0242	Cenpk	0.286214	0.0199797	1.69941	4	4	1	0
Q8R5F7	IFIH1_MOUSE	Ifih1	Interferon-induced helicase C domain-containing protein 1	35898.3	39214.3	50711.5	36773.8	35934.3	44811	55162.6	65342.5	15.1316	15.2591	15.63	15.1664	15.1331	15.4516	15.7514	15.9957	15.1316	15.2591	15.63	15.1664	15.1331	15.4516	15.7514	15.9957	Ifih1	0.28616	0.23904	0.621529	4	4	1	0
P47915	RL29_MOUSE	Rpl29	Large ribosomal subunit protein eL29	949843	797627	320446	503719	1153700	703503	413376	804879	19.8573	19.6054	18.2897	18.9423	20.1378	19.4242	18.6571	19.6184	19.8573	19.6054	18.2897	18.9423	20.1378	19.4242	18.6571	19.6184	Rpl29	0.285719	0.563259	0.249292	4	4	1	0
Q7TN73	CASD1_MOUSE	Casd1	N-acetylneuraminate (7)9-O-acetyltransferase	27613.9	20814.2	18949.1	19588.2	25065.2	29969.7	30743	20397.5	14.7531	14.3453	14.2098	14.2577	14.6134	14.8712	14.908	14.3161	14.7531	14.3453	14.2098	14.2577	14.6134	14.8712	14.908	14.3161	Casd1	0.285691	0.172782	0.7625	4	4	1	0
E9Q5G3	KIF23_MOUSE	Kif23	Kinesin-like protein KIF23	82582.1	91547.1	122289	97147.5	91414.5	133590	123687	131161	16.3335	16.4822	16.8999	16.5679	16.4801	17.0275	16.9163	17.001	16.3335	16.4822	16.8999	16.5679	16.4801	17.0275	16.9163	17.001	Kif23	0.285327	0.154273	0.81171	4	4	1	0
Q64282	IFIT1_MOUSE	Ifit1	Interferon-induced protein with tetratricopeptide repeats 1			10537.5	6734.77	3178.05		14225.8	16577.1			13.3632	12.7174	11.6339		13.7962	14.0169	12.2035	12.1943	13.3632	12.7174	11.6339	12.1714	13.7962	14.0169	Ifit1	0.284972	0.677343	0.169191	3	2	1	0
Q9ERF3	SKI8_MOUSE	Skic8	Superkiller complex protein 8	219223	238024	298153	205810	226196	299140	344071	302716	17.742	17.8607	18.1857	17.651	17.7872	18.1905	18.3923	18.2076	17.742	17.8607	18.1857	17.651	17.7872	18.1905	18.3923	18.2076	Skic8	0.284548	0.150983	0.821072	4	4	1	0
P56873	ZNRD2_MOUSE	Znrd2	Protein ZNRD2	11132.7	16925.3	14353.8	15744.8	19217.6	18921.6	15153.4	16993.3	13.4425	14.0469	13.8091	13.9426	14.2301	14.2077	13.8874	14.0527	13.4425	14.0469	13.8091	13.9426	14.2301	14.2077	13.8874	14.0527	Znrd2	0.284194	0.114532	0.941073	4	4	1	0
B1AUR6	MMS22_MOUSE	Mms22l	Protein MMS22-like	27405.8	27463.3	31012.2	20980.9	29623.7	33843	28245.3	37996.9	14.7422	14.7452	14.9205	14.3568	14.8545	15.0466	14.7857	15.2136	14.7422	14.7452	14.9205	14.3568	14.8545	15.0466	14.7857	15.2136	Mms22l	0.283901	0.113663	0.94438	4	4	1	0
Q8R4G6	MGT5A_MOUSE	Mgat5	Alpha-1,6-mannosylglycoprotein 6-beta-N-acetylglucosaminyltransferase A	12556.5	8808.59	16936.2	22058.5	5377.63	14591.8	29065.2	39796.4	13.6161	13.1047	14.0478	14.429	12.3928	13.8329	14.827	15.2804	13.6161	13.1047	14.0478	14.429	12.3928	13.8329	14.827	15.2804	Mgat5	0.283817	0.699231	0.155379	4	4	1	0
P97807	FUMH_MOUSE	Fh	Fumarate hydratase, mitochondrial	841138	610191	634195	663448	936865	843012	760638	789407	19.682	19.2189	19.2746	19.3396	19.8375	19.6852	19.5369	19.5904	19.682	19.2189	19.2746	19.3396	19.8375	19.6852	19.5369	19.5904	Fh	0.283715	0.060789	1.21617	4	4	1	0
Q6S5J6	KRIT1_MOUSE	Krit1	Krev interaction trapped protein 1	28270.4	41312	25349	43392.8	50954.3	40210.6	41680.5	33023.1	14.787	15.3343	14.6296	15.4052	15.6369	15.2953	15.3471	15.0112	14.787	15.3343	14.6296	15.4052	15.6369	15.2953	15.3471	15.0112	Krit1	0.283598	0.268577	0.570931	4	4	1	0
O89086	RBM3_MOUSE	Rbm3	RNA-binding protein 3	956396	359055	1067120	497601	444810	782618	1191170	964677	19.8672	18.4538	20.0253	18.9246	18.7628	19.5779	20.1839	19.8797	19.8672	18.4538	20.0253	18.9246	18.7628	19.5779	20.1839	19.8797	Rbm3	0.28335	0.580439	0.236244	4	4	1	0
Q91XD7	CREL1_MOUSE	Creld1	Protein disulfide isomerase Creld1	31618.7	24244.9	25972.6	16422.8	28755.3	26467.5	34111	27625	14.9485	14.5654	14.6647	14.0034	14.8115	14.6919	15.0579	14.7537	14.9485	14.5654	14.6647	14.0034	14.8115	14.6919	15.0579	14.7537	Creld1	0.283278	0.233225	0.632226	4	4	1	0
P80317	TCPZ_MOUSE	Cct6a	T-complex protein 1 subunit zeta	1492170	1558380	1145340	1358740	1659490	1825440	1554580	1685320	20.509	20.5716	20.1273	20.3738	20.6623	20.7998	20.5681	20.6846	20.509	20.5716	20.1273	20.3738	20.6623	20.7998	20.5681	20.6846	Cct6a	0.283257	0.0411853	1.38526	4	4	1	0
Q6PHQ8	NAA35_MOUSE	Naa35	N-alpha-acetyltransferase 35, NatC auxiliary subunit	22903.2	24477.7	19012.8	19811.5	25320.1	25079.9	26254.5	27773.9	14.4833	14.5792	14.2147	14.2741	14.628	14.6142	14.6803	14.7614	14.4833	14.5792	14.2147	14.2741	14.628	14.6142	14.6803	14.7614	Naa35	0.283196	0.021888	1.65979	4	4	1	0
Q8C167	PPCEL_MOUSE	Prepl	Prolyl endopeptidase-like	24293	16562.9	14140.2	24225.5	29897.1	16710.1	20195.1	29912.9	14.5683	14.0157	13.7875	14.5642	14.8677	14.0284	14.3017	14.8685	14.5683	14.0157	13.7875	14.5642	14.8677	14.0284	14.3017	14.8685	Prepl	0.282669	0.365164	0.437513	4	4	1	0
F6ZGI7	F6ZGI7_MOUSE	Mocs2	Molybdopterin synthase sulfur carrier subunit	19428	22133.1	18419.3	30681.9	25706.6	28409.2	26310.9	27689.4	14.2458	14.4339	14.1689	14.9051	14.6499	14.7941	14.6834	14.757	14.2458	14.4339	14.1689	14.9051	14.6499	14.7941	14.6834	14.757	Mocs2	0.282636	0.144448	0.840289	4	4	1	0
O35134	RPA1_MOUSE	Polr1a	DNA-directed RNA polymerase I subunit RPA1	40991.4	37196.1	33495.7	40294.1	41514.1	61771.3	45890.8	38258	15.323	15.1829	15.0317	15.2983	15.3413	15.9146	15.4859	15.2235	15.323	15.1829	15.0317	15.2983	15.3413	15.9146	15.4859	15.2235	Polr1a	0.282372	0.137802	0.860745	4	4	1	0
Q9CQB2	MCRI2_MOUSE	Mcrip2	MAPK regulated corepressor interacting protein 2	8102.58	6310.74	7761.73	8400.82	8646.67	11992.9	9080.37	7745.9	12.9842	12.6236	12.9222	13.0363	13.0779	13.5499	13.1485	12.9192	12.9842	12.6236	12.9222	13.0363	13.0779	13.5499	13.1485	12.9192	Mcrip2	0.282335	0.133727	0.873779	4	4	1	0
A2AG58	BCLA3_MOUSE	Bclaf3	BCLAF1 and THRAP3 family member 3	20124.1	14955	30865	16268.8	20598.8	22118.7	33276.5	21801.4	14.2966	13.8683	14.9137	13.9898	14.3303	14.433	15.0222	14.4121	14.2966	13.8683	14.9137	13.9898	14.3303	14.433	15.0222	14.4121	Bclaf3	0.28228	0.356529	0.447906	4	4	1	0
P33611	DPOA2_MOUSE	Pola2	DNA polymerase alpha subunit B	103018	141299	166288	101727	121840	155739	184384	153731	16.6525	17.1084	17.3433	16.6343	16.8946	17.2488	17.4924	17.23	16.6525	17.1084	17.3433	16.6343	16.8946	17.2488	17.4924	17.23	Pola2	0.281801	0.235328	0.628325	4	4	1	0
Q91W39	NCOA5_MOUSE	Ncoa5	Nuclear receptor coactivator 5	108650	83775	112880	98723	111704	111137	133179	133954	16.7293	16.3542	16.7844	16.5911	16.7693	16.762	17.023	17.0314	16.7293	16.3542	16.7844	16.5911	16.7693	16.762	17.023	17.0314	Ncoa5	0.281649	0.0604952	1.21828	4	4	1	0
Q8BWJ3	KPB2_MOUSE	Phka2	Phosphorylase b kinase regulatory subunit alpha, liver isoform	179393	150150	189353	31117.9	160172	39996.7	217870	248172	17.4528	17.196	17.5307	14.9255	17.2893	15.2876	17.7331	17.921	17.4528	17.196	17.5307	14.9255	17.2893	15.2876	17.7331	17.921	Phka2	0.28149	0.756407	0.121244	4	4	1	0
Q8R409	HEXI1_MOUSE	Hexim1	Protein HEXIM1	86663.7	89766	96960	98199.1	110975	110146	114323	115639	16.4031	16.4539	16.5651	16.5834	16.7599	16.7491	16.8028	16.8193	16.4031	16.4539	16.5651	16.5834	16.7599	16.7491	16.8028	16.8193	Hexim1	0.281353	0.000936424	3.02853	4	4	1	0
Q9EPV8	UBL5_MOUSE	Ubl5	Ubiquitin-like protein 5	99316.3	71666.1	63183.6	90397.4	115372	93046.1	86188.9	95687.4	16.5997	16.129	15.9473	16.464	16.8159	16.5057	16.3952	16.546	16.5997	16.129	15.9473	16.464	16.8159	16.5057	16.3952	16.546	Ubl5	0.280711	0.158707	0.799404	4	4	1	0
A0A087WNL7;A0A087WQ44;A0A087WNX7;A0A087WP63	A0A087WNL7_MOUSE;A0A087WNX7_MOUSE;A0A087WP63_MOUSE;A0A087WQ44_MOUSE	Gm42715;Srcap	Snf2-related CREBBP activator protein	54413.2	57981.5	56895.5	54488.4	74276.7	68665.1	60995.7	68384.8	15.7317	15.8233	15.796	15.7337	16.1806	16.0673	15.8964	16.0614	15.7317	15.8233	15.796	15.7337	16.1806	16.0673	15.8964	16.0614	Gm42715;Srcap	0.280264	0.00428018	2.36854	4	4	1	0
P59708	SF3B6_MOUSE	Sf3b6	Splicing factor 3B subunit 6	440985	370462	286852	505894	470916	494459	389024	568766	18.7504	18.499	18.1299	18.9485	18.8451	18.9155	18.5695	19.1175	18.7504	18.499	18.1299	18.9485	18.8451	18.9155	18.5695	19.1175	Sf3b6	0.279955	0.230359	0.637595	4	4	1	0
Q9JHU9	INO1_MOUSE	Isyna1	Inositol-3-phosphate synthase 1	341254	331631	206158	304657	342089	333644	279711	483828	18.3805	18.3392	17.6534	18.2168	18.384	18.348	18.0936	18.8841	18.3805	18.3392	17.6534	18.2168	18.384	18.348	18.0936	18.8841	Isyna1	0.279938	0.280349	0.5523	4	4	1	0
Q9D2E2	TOE1_MOUSE	Toe1	Target of EGR1 protein 1	100341	73826.7	70545	90367.1	86663.6	104367	96124.5	118002	16.6146	16.1719	16.1063	16.4635	16.4031	16.6713	16.5526	16.8485	16.6146	16.1719	16.1063	16.4635	16.4031	16.6713	16.5526	16.8485	Toe1	0.279835	0.116633	0.933178	4	4	1	0
O54879	HMGB3_MOUSE	Hmgb3	High mobility group protein B3	287605	381385	288174	362570	339659	431275	432145	392716	18.1337	18.5409	18.1366	18.4679	18.3737	18.7182	18.7212	18.5831	18.1337	18.5409	18.1366	18.4679	18.3737	18.7182	18.7212	18.5831	Hmgb3	0.27929	0.084271	1.07432	4	4	1	0
Q2KN98	CYTSA_MOUSE	Specc1l	Cytospin-A	33811	31270.4	39179.7	16498.6	39072.7	37723.1	30043.1	33457.7	15.0452	14.9325	15.2578	14.0101	15.2539	15.2032	14.8747	15.0301	15.0452	14.9325	15.2578	14.0101	15.2539	15.2032	14.8747	15.0301	Specc1l	0.27906	0.371111	0.430496	4	4	1	0
P61514	RL37A_MOUSE	Rpl37a	Large ribosomal subunit protein eL43	1066400	845492	861041	936756	1182230	1155040	1075430	1073020	20.0243	19.6894	19.7157	19.8373	20.1731	20.1395	20.0365	20.0332	20.0243	19.6894	19.7157	19.8373	20.1731	20.1395	20.0365	20.0332	Rpl37a	0.278883	0.0162249	1.78982	4	4	1	0
Q9CVD2	ATX3_MOUSE	Atxn3	Ataxin-3	99194.1	99342.2	92625.7	115426	123218	125521	123600	119413	16.598	16.6001	16.4991	16.8166	16.9109	16.9376	16.9153	16.8656	16.598	16.6001	16.4991	16.8166	16.9109	16.9376	16.9153	16.8656	Atxn3	0.278881	0.00664324	2.17762	4	4	1	0
Q9D0D4	DIM1_MOUSE	Dimt1	Dimethyladenosine transferase	40678.2	43280.9	49222.2	39354.3	42558.6	57680	50930.5	59061.5	15.312	15.4014	15.587	15.2642	15.3772	15.8158	15.6362	15.8499	15.312	15.4014	15.587	15.2642	15.3772	15.8158	15.6362	15.8499	Dimt1	0.278613	0.0750258	1.12479	4	4	1	0
Q8BT60	CPNE3_MOUSE	Cpne3	Copine-3	346228	394476	281540	557554	506547	504317	398504	455939	18.4014	18.5896	18.103	19.0888	18.9503	18.944	18.6042	18.7985	18.4014	18.5896	18.103	19.0888	18.9503	18.944	18.6042	18.7985	Cpne3	0.278588	0.256739	0.590507	4	4	1	0
A2A6J4;A2A6J7	A2A6J4_MOUSE;A2A6J7_MOUSE	Lsp1	Lymphocyte specific 1	149653	150794	118801	150406	89078.7	150117	267958	243091	17.1913	17.2022	16.8582	17.1985	16.4428	17.1957	18.0316	17.8911	17.1913	17.2022	16.8582	17.1985	16.4428	17.1957	18.0316	17.8911	Lsp1	0.277783	0.486389	0.313016	4	4	1	0
Q8R5K2	UBP33_MOUSE	Usp33	Ubiquitin carboxyl-terminal hydrolase 33	22859.1	23707.1	19285.7	23155.8	25036.4	22537.8	34396.7	26934.2	14.4805	14.533	14.2352	14.4991	14.6117	14.4601	15.07	14.7172	14.4805	14.533	14.2352	14.4991	14.6117	14.4601	15.07	14.7172	Usp33	0.277773	0.106643	0.972068	4	4	1	0
Q9CR98	F136A_MOUSE	Fam136a	Protein FAM136A	40085.5	61469.9	57042.6	50517.6	54687.7	71014.5	64325.1	61393.3	15.2908	15.9076	15.7998	15.6245	15.7389	16.1158	15.9731	15.9058	15.2908	15.9076	15.7998	15.6245	15.7389	16.1158	15.9731	15.9058	Fam136a	0.277752	0.125157	0.902544	4	4	1	0
O54916	REPS1_MOUSE	Reps1	RalBP1-associated Eps domain-containing protein 1	57988.1	62479.1	63415.8	52547.3	74859	63986.8	73392.1	74166.8	15.8235	15.9311	15.9526	15.6813	16.1919	15.9655	16.1633	16.1785	15.8235	15.9311	15.9526	15.6813	16.1919	15.9655	16.1633	16.1785	Reps1	0.27769	0.0146536	1.83406	4	4	1	0
P53026	RL10A_MOUSE	Rpl10a	Large ribosomal subunit protein uL1	1268250	1274770	1385010	1278340	1285860	1355710	2030130	1745780	20.2744	20.2818	20.4015	20.2858	20.2943	20.3706	20.9531	20.7354	20.2744	20.2818	20.4015	20.2858	20.2943	20.3706	20.9531	20.7354	Rpl10a	0.277495	0.129567	0.887506	4	4	1	0
Q9ESJ4	SPN90_MOUSE	Nckipsd	NCK-interacting protein with SH3 domain	72724.6	73799.8	85837.9	67347.5	90471.6	86305.2	101489	84469.4	16.1502	16.1713	16.3893	16.0393	16.4652	16.3972	16.631	16.3661	16.1502	16.1713	16.3893	16.0393	16.4652	16.3972	16.631	16.3661	Nckipsd	0.277323	0.0257111	1.58988	4	4	1	0
Q0VBD2	MCM10_MOUSE	Mcm10	Protein MCM10 homolog	7219.26	6325.29	6307.61	11681.7	9462.03	7546.98	11272.9	9016.39	12.8176	12.6269	12.6229	13.512	13.2079	12.8817	13.4606	13.1383	12.8176	12.6269	12.6229	13.512	13.2079	12.8817	13.4606	13.1383	Mcm10	0.277283	0.295439	0.529532	4	4	1	0
Q61457	CCNE1_MOUSE	Ccne1	G1/S-specific cyclin-E1	18589.4		17852.8	17764.8	19561.2	16232.3	16841.1	11141.3	14.1822		14.1239	14.1167	14.2557	13.9866	14.0397	13.4436	14.1822	12.1943	14.1239	14.1167	14.2557	13.9866	14.0397	13.4436	Ccne1	0.277123	0.610945	0.213998	4	3	1	0
Q99LM2	CK5P3_MOUSE	Cdk5rap3	CDK5 regulatory subunit-associated protein 3	48693.6	36502.2	45357.9	54018.2	59581.4	53067	49477.6	60024.2	15.5714	15.1557	15.4691	15.7212	15.8626	15.6955	15.5945	15.8733	15.5714	15.1557	15.4691	15.7212	15.8626	15.6955	15.5945	15.8733	Cdk5rap3	0.27712	0.0903526	1.04406	4	4	1	0
Q9D8S4	ORN_MOUSE	Rexo2	Oligoribonuclease, mitochondrial	117625	140872	155196	122250	148835	165831	172821	158778	16.8438	17.104	17.2437	16.8995	17.1834	17.3394	17.3989	17.2767	16.8438	17.104	17.2437	16.8995	17.1834	17.3394	17.3989	17.2767	Rexo2	0.276803	0.0365961	1.43657	4	4	1	0
Q8R1Q9	RBSK_MOUSE	Rbks	Ribokinase	114149	96227	102398	103171	124345	120380	121065	137936	16.8006	16.5542	16.6438	16.6547	16.924	16.8772	16.8854	17.0736	16.8006	16.5542	16.6438	16.6547	16.924	16.8772	16.8854	17.0736	Rbks	0.276767	0.00678121	2.16869	4	4	1	0
Q9CYX7	RRP15_MOUSE	Rrp15	RRP15-like protein	115958	133051	138853	124044	142431	165274	168088	144609	16.8232	17.0216	17.0832	16.9205	17.1199	17.3345	17.3589	17.1418	16.8232	17.0216	17.0832	16.9205	17.1199	17.3345	17.3589	17.1418	Rrp15	0.276626	0.017222	1.76392	4	4	1	0
Q8CGK3	LONM_MOUSE	Lonp1	Lon protease homolog, mitochondrial	215617	201000	206395	209198	195401	234353	254077	346086	17.7181	17.6168	17.655	17.6745	17.5761	17.8383	17.9549	18.4008	17.7181	17.6168	17.655	17.6745	17.5761	17.8383	17.9549	18.4008	Lonp1	0.276393	0.161954	0.790608	4	4	1	0
Q61550	RAD21_MOUSE	Rad21	Double-strand-break repair protein rad21 homolog	300026	264427	254931	285930	333973	326987	330480	344738	18.1947	18.0125	17.9597	18.1253	18.3494	18.3189	18.3342	18.3951	18.1947	18.0125	17.9597	18.1253	18.3494	18.3189	18.3342	18.3951	Rad21	0.276326	0.00256062	2.59165	4	4	1	0
A0A0G2JGY6	A0A0G2JGY6_MOUSE	Supt20	SPT20 SAGA complex component	10152.2	7393.48	11276.6	5307.49	5145.95	11307.7	14591.2	11376.2	13.3095	12.852	13.461	12.3738	12.3292	13.465	13.8328	13.4737	13.3095	12.852	13.461	12.3738	12.3292	13.465	13.8328	13.4737	Supt20	0.276095	0.524414	0.280326	4	4	1	0
B2RUJ5	APBA1_MOUSE	Apba1	Amyloid-beta A4 precursor protein-binding family A member 1	28286.8	56814.3	54498.1	52867.5	44334.9	47893.4	78694.3	59576.9	14.7878	15.794	15.7339	15.6901	15.4362	15.5475	16.264	15.8625	14.7878	15.794	15.7339	15.6901	15.4362	15.5475	16.264	15.8625	Apba1	0.276078	0.396538	0.401715	4	4	1	0
Q9JI10	STK3_MOUSE	Stk3	Serine/threonine-protein kinase 3	46399.9	48713.8	44544.3	49084.6	53962.9	57722.1	54839	62172.3	15.5018	15.572	15.443	15.583	15.7197	15.8168	15.7429	15.924	15.5018	15.572	15.443	15.583	15.7197	15.8168	15.7429	15.924	Stk3	0.275901	0.00273938	2.56235	4	4	1	0
Q80YR2	FHI2B_MOUSE	Fhip2b	FHF complex subunit HOOK-interacting protein 2B	6842.78	8141.8	13770.9	15437.3	13900.9	10605.4	10589.2	16295.5	12.7404	12.9911	13.7493	13.9141	13.7629	13.3725	13.3703	13.9922	12.7404	12.9911	13.7493	13.9141	13.7629	13.3725	13.3703	13.9922	Fhip2b	0.275732	0.427563	0.369	4	4	1	0
Q6TYB5	FEZ2_MOUSE	Fez2	Fasciculation and elongation protein zeta-2	25152	25616.2	35246.2	31501.5	40117.5	34028.9	40512.1	27760.5	14.6184	14.6448	15.1052	14.9431	15.2919	15.0545	15.3061	14.7607	14.6184	14.6448	15.1052	14.9431	15.2919	15.0545	15.3061	14.7607	Fez2	0.27544	0.164862	0.782879	4	4	1	0
Q3UTB2	Q3UTB2_MOUSE	A630001G21Rik	RIKEN cDNA A630001G21 gene	20560	23584.3	29136.3	19143.1	24913.9	28214.6	30837.6	26750.1	14.3276	14.5255	14.8305	14.2245	14.6047	14.7842	14.9124	14.7073	14.3276	14.5255	14.8305	14.2245	14.6047	14.7842	14.9124	14.7073	A630001G21Rik	0.27508	0.113006	0.9469	4	4	1	0
A8C756	THADA_MOUSE	Thada	tRNA (32-2'-O)-methyltransferase regulator THADA	37953.8	35995.2	41618.1	37844	43784.9	44988.5	45603.4	51344.1	15.212	15.1355	15.3449	15.2078	15.4181	15.4573	15.4769	15.6479	15.212	15.1355	15.3449	15.2078	15.4181	15.4573	15.4769	15.6479	Thada	0.275001	0.0063056	2.20027	4	4	1	0
Q3U1T9	DEN1B_MOUSE	Dennd1b	DENN domain-containing protein 1B	8606.8	7025.42	8259.02	7177.12	9583.1	14236.3	10973.3		13.0713	12.7784	13.0118	12.8092	13.2263	13.7973	13.4217		13.0713	12.7784	13.0118	12.8092	13.2263	13.7973	13.4217	12.3248	Dennd1b	0.274882	0.424585	0.372036	3	4	1	0
A0A0G2JEP4	A0A0G2JEP4_MOUSE	Lrrfip2	Leucine-rich repeat flightless-interacting protein 2	105663	121206	100737	101994	139352	127208	128809	123415	16.6891	16.8871	16.6202	16.6381	17.0884	16.9568	16.9749	16.9132	16.6891	16.8871	16.6202	16.6381	17.0884	16.9568	16.9749	16.9132	Lrrfip2	0.274666	0.00866998	2.06198	4	4	1	0
Q91YU8	SSF1_MOUSE	Ppan	Suppressor of SWI4 1 homolog	25482.2	22438	28101.9	18589.2	29180.6	31386.7	27730.3	25183.3	14.6372	14.4537	14.7784	14.1822	14.8327	14.9379	14.7592	14.6202	14.6372	14.4537	14.7784	14.1822	14.8327	14.9379	14.7592	14.6202	Ppan	0.274632	0.107039	0.970458	4	4	1	0
Q9CQQ8	LSM7_MOUSE	Lsm7	U6 snRNA-associated Sm-like protein LSm7	77057.1	63940.3	31482.1	53353.8	107886	64472.2	41201.1	61814.7	16.2336	15.9644	14.9422	15.7033	16.7191	15.9764	15.3304	15.9157	16.2336	15.9644	14.9422	15.7033	16.7191	15.9764	15.3304	15.9157	Lsm7	0.274492	0.516163	0.287213	4	4	1	0
P52503	NDUS6_MOUSE	Ndufs6	NADH dehydrogenase [ubiquinone] iron-sulfur protein 6, mitochondrial	302737	305814	276521	311330	416429	365699	340726	328778	18.2077	18.2223	18.077	18.2481	18.6677	18.4803	18.3783	18.3268	18.2077	18.2223	18.077	18.2481	18.6677	18.4803	18.3783	18.3268	Ndufs6	0.274475	0.0174031	1.75937	4	4	1	0
Q9EPJ9	ARFG1_MOUSE	Arfgap1	ADP-ribosylation factor GTPase-activating protein 1	137013	129935	112196	134176	133660	163098	171028	153857	17.064	16.9874	16.7757	17.0338	17.0282	17.3154	17.3839	17.2312	17.064	16.9874	16.7757	17.0338	17.0282	17.3154	17.3839	17.2312	Arfgap1	0.27447	0.0346414	1.4604	4	4	1	0
Q5PPR2	Q5PPR2_MOUSE	Exoc1	Exocyst complex component 1	181057	182862	164744	191342	182150	220689	231933	239469	17.4661	17.4804	17.3299	17.5458	17.4748	17.7517	17.8233	17.8695	17.4661	17.4804	17.3299	17.5458	17.4748	17.7517	17.8233	17.8695	Exoc1	0.274277	0.032825	1.48379	4	4	1	0
Q9QXX8	NUFP1_MOUSE	Nufip1	FMR1-interacting protein NUFIP1	25826	29706.2	41037.4	30001	31075.7	42320.3	44606.9	34403.3	14.6565	14.8585	15.3247	14.8727	14.9235	15.3691	15.445	15.0703	14.6565	14.8585	15.3247	14.8727	14.9235	15.3691	15.445	15.0703	Nufip1	0.273853	0.193939	0.712335	4	4	1	0
O88952	LIN7C_MOUSE	Lin7c	Protein lin-7 homolog C	202175	184548	176639	175800	215580	200823	274137	208538	17.6252	17.4936	17.4304	17.4236	17.7179	17.6156	18.0645	17.67	17.6252	17.4936	17.4304	17.4236	17.7179	17.6156	18.0645	17.67	Lin7c	0.273754	0.0496228	1.30432	4	4	1	0
Q6ZQM0	RFFL_MOUSE	Rffl	E3 ubiquitin-protein ligase rififylin	30596.8	22789	39597.5		20968.9	24958.9	30703.9	17454.4	14.9011	14.476	15.2731		14.356	14.6073	14.9061	14.0913	14.9011	14.476	15.2731	12.2163	14.356	14.6073	14.9061	14.0913	Rffl	0.273523	0.712623	0.14714	4	3	1	0
Q61967	ZFP90_MOUSE	Zfp90	Zinc finger protein 90	9741	10466.5	9239.14	9228.44	8875.08	11899.2	13796.7	12715.6	13.2499	13.3535	13.1735	13.1719	13.1155	13.5386	13.752	13.6343	13.2499	13.3535	13.1735	13.1719	13.1155	13.5386	13.752	13.6343	Zfp90	0.272927	0.108899	0.962978	4	4	1	0
A0A1B0GR18	A0A1B0GR18_MOUSE	Mob2	MOB kinase activator 2	134269	147949	138929	174185	182612	177318	166145	190379	17.0348	17.1747	17.084	17.4103	17.4784	17.436	17.3421	17.5385	17.0348	17.1747	17.084	17.4103	17.4784	17.436	17.3421	17.5385	Mob2	0.272811	0.0261616	1.58234	4	4	1	0
Q9ER41	TOR1B_MOUSE	Tor1b	Torsin-1B	105297	63766	112943	104421	84108.5	130209	125920	122297	16.6841	15.9605	16.7852	16.6721	16.36	16.9905	16.9421	16.9	16.6841	15.9605	16.7852	16.6721	16.36	16.9905	16.9421	16.9	Tor1b	0.27268	0.29993	0.52298	4	4	1	0
Q6A009	LTN1_MOUSE	Ltn1	E3 ubiquitin-protein ligase listerin	35509.7	33791	40215.9	33970	41460.6	41140.7	48159.1	42498.5	15.1159	15.0444	15.2955	15.052	15.3395	15.3283	15.5555	15.3751	15.1159	15.0444	15.2955	15.052	15.3395	15.3283	15.5555	15.3751	Ltn1	0.272662	0.0134906	1.86997	4	4	1	0
Q9WUB3	PYGM_MOUSE	Pygm	Glycogen phosphorylase, muscle form	86078.2	50137.9	65102.7	36201	85325.5	33821.4	146935	51064.2	16.3934	15.6136	15.9904	15.1437	16.3807	15.0456	17.1648	15.64	16.3934	15.6136	15.9904	15.1437	16.3807	15.0456	17.1648	15.64	Pygm	0.272509	0.626059	0.203385	4	4	1	0
Q9CQK1	ZNHI3_MOUSE	Znhit3	Zinc finger HIT domain-containing protein 3	3415.49	5471.53	5666.55	6218.33	7959.99	5054.85	4934.99	7057.79	11.7379	12.4177	12.4683	12.6023	12.9586	12.3035	12.2688	12.785	11.7379	12.4177	12.4683	12.6023	12.9586	12.3035	12.2688	12.785	Znhit3	0.272416	0.334232	0.475952	4	4	1	0
Q8C9X6	EPC1_MOUSE	Epc1	Enhancer of polycomb homolog 1	18032.5	24194.1	20236.4	15689.9	20000.9	22687.3	24927.9	26062.2	14.1383	14.5624	14.3047	13.9375	14.2878	14.4696	14.6055	14.6697	14.1383	14.5624	14.3047	13.9375	14.2878	14.4696	14.6055	14.6697	Epc1	0.272407	0.133237	0.875374	4	4	1	0
Q9QYT7	PIGQ_MOUSE	Pigq	Phosphatidylinositol N-acetylglucosaminyltransferase subunit Q	9387.91	8372.87	9710.45	9595.97	9299.1	11660	11352.9	12660.7	13.1966	13.0315	13.2453	13.2282	13.1829	13.5093	13.4708	13.6281	13.1966	13.0315	13.2453	13.2282	13.1829	13.5093	13.4708	13.6281	Pigq	0.272342	0.0429156	1.36738	4	4	1	0
O88627	S28A2_MOUSE	Slc28a2	Sodium/nucleoside cotransporter 2	40847.4	32299.5	41061.2	34565.8	34579.5	47161.7	54688.3	44661.9	15.318	14.9792	15.3255	15.0771	15.0776	15.5253	15.7389	15.4468	15.318	14.9792	15.3255	15.0771	15.0776	15.5253	15.7389	15.4468	Slc28a2	0.272233	0.145917	0.835894	4	4	1	0
Q9DB10	EMRE_MOUSE	Smdt1	Essential MCU regulator, mitochondrial	31508.4	19783.3	22316.9	27703.4	33441.2	38513.8	23508.7	27067.2	14.9434	14.272	14.4458	14.7578	15.0293	15.2331	14.5209	14.7243	14.9434	14.272	14.4458	14.7578	15.0293	15.2331	14.5209	14.7243	Smdt1	0.272131	0.259895	0.585202	4	4	1	0
Q65Z40	WAPL_MOUSE	Wapl	Wings apart-like protein homolog	105408	102661	90480.8	100420	119734	120360	122111	118806	16.6856	16.6475	16.4653	16.6157	16.8695	16.877	16.8978	16.8582	16.6856	16.6475	16.4653	16.6157	16.8695	16.877	16.8978	16.8582	Wapl	0.272097	0.00143529	2.84306	4	4	1	0
Q3TUU5	TEX30_MOUSE	Tex30	Testis-expressed protein 30	62153.1	72882.2	87160.8	70373	79644.3	88408.8	87361.7	95898	15.9235	16.1533	16.4114	16.1027	16.2813	16.4319	16.4147	16.5492	15.9235	16.1533	16.4114	16.1027	16.2813	16.4319	16.4147	16.5492	Tex30	0.271542	0.0557557	1.25371	4	4	1	0
H3BJ67;H3BKQ3;H3BL92	H3BJ67_MOUSE;H3BKQ3_MOUSE;H3BL92_MOUSE	Evi5l	Ecotropic viral integration site 5 like	2729.41		3807.82						11.4144		11.8947						11.4144	12.1943	11.8947	12.2163	12.0989	12.1714	12.2107	12.3248	Evi5l	0.271512	0.208537	0.680818	0	2	1	0
Q3UFB2	BCD1_MOUSE	Znhit6	Box C/D snoRNA protein 1	7068.12	9773.72	8575.82	11590	13418.4	9625.92	14512.4	7770.02	12.7871	13.2547	13.0661	13.5006	13.7119	13.2327	13.825	12.9237	12.7871	13.2547	13.0661	13.5006	13.7119	13.2327	13.825	12.9237	Znhit6	0.27122	0.33486	0.475137	4	4	1	0
Q9Z0P5	TWF2_MOUSE	Twf2	Twinfilin-2	476462	458025	514329	331822	476333	581316	459831	620459	18.862	18.8051	18.9723	18.3401	18.8616	19.149	18.8107	19.243	18.862	18.8051	18.9723	18.3401	18.8616	19.149	18.8107	19.243	Twf2	0.271211	0.172481	0.763259	4	4	1	0
Q9R1C0	TAF7_MOUSE	Taf7	Transcription initiation factor TFIID subunit 7	27268	23357	33201.7	24395.7	29156.6	33229.8	38934	29007	14.7349	14.5116	15.019	14.5743	14.8315	15.0202	15.2487	14.8241	14.7349	14.5116	15.019	14.5743	14.8315	15.0202	15.2487	14.8241	Taf7	0.271196	0.122867	0.910564	4	4	1	0
Q9CPT3	NANP_MOUSE	Nanp	N-acylneuraminate-9-phosphatase	81418.2	83117.8	85785.1	73489	90625.7	102261	110906	88011.3	16.3131	16.3429	16.3884	16.1652	16.4676	16.6419	16.759	16.4254	16.3131	16.3429	16.3884	16.1652	16.4676	16.6419	16.759	16.4254	Nanp	0.271074	0.0250653	1.60093	4	4	1	0
Q99J83	ATG5_MOUSE	Atg5	Autophagy protein 5	28138.3	37766.6	48147.5	31792.8	37656.9	39605	51286.7	45083.4	14.7802	15.2048	15.5552	14.9564	15.2006	15.2734	15.6463	15.4603	14.7802	15.2048	15.5552	14.9564	15.2006	15.2734	15.6463	15.4603	Atg5	0.270993	0.215032	0.667497	4	4	1	0
Q80UK8	INT2_MOUSE	Ints2	Integrator complex subunit 2	45795.1	39398.5	36762.4	32856.8	55845.9	41318.8	48193.8	41515.2	15.4829	15.2659	15.1659	15.0039	15.7692	15.3345	15.5566	15.3414	15.4829	15.2659	15.1659	15.0039	15.7692	15.3345	15.5566	15.3414	Ints2	0.270745	0.109037	0.962425	4	4	1	0
Q61161	M4K2_MOUSE	Map4k2	Mitogen-activated protein kinase kinase kinase kinase 2	39697.3	35887.9	47320.5	43266.8	34156.2	51418.4	55424.1	63476.7	15.2768	15.1312	15.5302	15.401	15.0599	15.65	15.7582	15.9539	15.2768	15.1312	15.5302	15.401	15.0599	15.65	15.7582	15.9539	Map4k2	0.270727	0.245835	0.609357	4	4	1	0
E2JF22	PIEZ1_MOUSE	Piezo1	Piezo-type mechanosensitive ion channel component 1	48491.1	50465.6	48534.9	51022.9	55417.2	53895.7	64015.4	67121.9	15.5654	15.623	15.5667	15.6389	15.758	15.7179	15.9661	16.0345	15.5654	15.623	15.5667	15.6389	15.758	15.7179	15.9661	16.0345	Piezo1	0.27063	0.0146056	1.83548	4	4	1	0
Q5SSZ5	TENS3_MOUSE	Tns3	Tensin-3	63612.4	59852.5	61945.4	64208.9	79337.4	71989.5	76080.5	73707.5	15.957	15.8691	15.9187	15.9705	16.2757	16.1355	16.2152	16.1695	15.957	15.8691	15.9187	15.9705	16.2757	16.1355	16.2152	16.1695	Tns3	0.270159	0.00038432	3.41531	4	4	1	0
Q7TT79	MCPH1_MOUSE	Mcph1	Microcephalin	9551.95	10477.3	15547.1	8310.01	11281.6	16620.1	11458.1	12717	13.2216	13.355	13.9244	13.0206	13.4617	14.0206	13.4841	13.6345	13.2216	13.355	13.9244	13.0206	13.4617	14.0206	13.4841	13.6345	Mcph1	0.269831	0.290955	0.536174	4	4	1	0
Q9CPN9	Q9CPN9_MOUSE	Prss3b	Serine protease 3B	27624.8			31580.6	18623.9	22821.7		21186.8	14.7537			14.9468	14.1849	14.4781		14.3709	14.7537	12.1943	12.2707	14.9468	14.1849	14.4781	12.2107	14.3709	Prss3b	0.269773	0.781052	0.10732	3	2	1	0
Q8C7R4	UBA6_MOUSE	Uba6	Ubiquitin-like modifier-activating enzyme 6	247265	251780	281597	241773	275763	302954	326721	328066	17.9157	17.9418	18.1033	17.8833	18.0731	18.2087	18.3177	18.3236	17.9157	17.9418	18.1033	17.8833	18.0731	18.2087	18.3177	18.3236	Uba6	0.269767	0.0124252	1.9057	4	4	1	0
Q5DW34	EHMT1_MOUSE	Ehmt1	Histone-lysine N-methyltransferase EHMT1	114617	108874	122828	138920	120692	146351	157106	162057	16.8065	16.7323	16.9063	17.0839	16.881	17.1591	17.2614	17.3061	16.8065	16.7323	16.9063	17.0839	16.881	17.1591	17.2614	17.3061	Ehmt1	0.269657	0.069167	1.1601	4	4	1	0
Q9CQJ6	DENR_MOUSE	Denr	Density-regulated protein	33258.6	22088.4	17169	24650.5	46365.8	16489.3	19974.8	42995.3	15.0214	14.431	14.0675	14.5893	15.5008	14.0092	14.2859	15.3919	15.0214	14.431	14.0675	14.5893	15.5008	14.0092	14.2859	15.3919	Denr	0.269628	0.552062	0.258012	4	4	1	0
Q9D1C8	VPS28_MOUSE	Vps28	Vacuolar protein sorting-associated protein 28 homolog	69860	91974.1	85277.4	89050.8	84314.8	99893.3	101498	120412	16.0922	16.4889	16.3799	16.4423	16.3635	16.6081	16.6311	16.8776	16.0922	16.4889	16.3799	16.4423	16.3635	16.6081	16.6311	16.8776	Vps28	0.269244	0.0983835	1.00708	4	4	1	0
Q99MD9	NASP_MOUSE	Nasp	Nuclear autoantigenic sperm protein	601403	689825	589069	618284	731239	767948	714161	794736	19.198	19.3959	19.1681	19.2379	19.48	19.5506	19.4459	19.6001	19.198	19.3959	19.1681	19.2379	19.48	19.5506	19.4459	19.6001	Nasp	0.269202	0.0046587	2.33173	4	4	1	0
A0A0B4J1G5	A0A0B4J1G5_MOUSE	Elf2	E74-like factor 2	23494.5	24321.6	24863.7	28634	35458.2	31986.8	29341.8	25753.1	14.52	14.57	14.6018	14.8054	15.1138	14.9652	14.8407	14.6525	14.52	14.57	14.6018	14.8054	15.1138	14.9652	14.8407	14.6525	Elf2	0.268742	0.0598616	1.22285	4	4	1	0
Q9QYI3	DNJC7_MOUSE	Dnajc7	DnaJ homolog subfamily C member 7	214444	161684	174380	155964	259451	216352	197229	179437	17.7102	17.3028	17.4119	17.2509	17.9851	17.723	17.5895	17.4531	17.7102	17.3028	17.4119	17.2509	17.9851	17.723	17.5895	17.4531	Dnajc7	0.268742	0.129581	0.887458	4	4	1	0
E9Q7M2	T22D2_MOUSE	Tsc22d2	TSC22 domain family protein 2	75767.6	87398.1	67708.3	98510.4	85587.9	106672	114102	89113.8	16.2093	16.4153	16.047	16.588	16.3851	16.7028	16.8	16.4434	16.2093	16.4153	16.047	16.588	16.3851	16.7028	16.8	16.4434	Tsc22d2	0.267906	0.134282	0.871982	4	4	1	0
Q8BW72	KDM4A_MOUSE	Kdm4a	Lysine-specific demethylase 4A	72255.6	86729.9	71030	88477.9	100393	112312	82007.8	89452.6	16.1408	16.4042	16.1161	16.433	16.6153	16.7772	16.3235	16.4488	16.1408	16.4042	16.1161	16.433	16.6153	16.7772	16.3235	16.4488	Kdm4a	0.267632	0.0847352	1.07194	4	4	1	0
A2ACJ2	FP100_MOUSE	Faap100	Fanconi anemia core complex-associated protein 100	11941.8	11251.8	14350	10365.8	10110.6	14369.7	16268.8	17744.4	13.5437	13.4579	13.8088	13.3395	13.3036	13.8107	13.9898	14.1151	13.5437	13.4579	13.8088	13.3395	13.3036	13.8107	13.9898	14.1151	Faap100	0.267328	0.238607	0.622317	4	4	1	0
Q62523	ZYX_MOUSE	Zyx	Zyxin	528170	474541	490452	653044	856771	793322	449902	550322	19.0106	18.8562	18.9038	19.3168	19.7086	19.5975	18.7793	19.0699	19.0106	18.8562	18.9038	19.3168	19.7086	19.5975	18.7793	19.0699	Zyx	0.266969	0.313734	0.503438	4	4	1	0
Q9D2M8	UB2V2_MOUSE	Ube2v2	Ubiquitin-conjugating enzyme E2 variant 2	224278	128817	111263	192035	260493	224507	120927	182874	17.7749	16.975	16.7636	17.551	17.9909	17.7764	16.8838	17.4805	17.7749	16.975	16.7636	17.551	17.9909	17.7764	16.8838	17.4805	Ube2v2	0.266759	0.45995	0.337289	4	4	1	0
Q8CES0	NAA30_MOUSE	Naa30	N-alpha-acetyltransferase 30	59909.9	26732	50601.4	59165	48027.5	53161.3	85692.2	45904	15.8705	14.7063	15.6269	15.8525	15.5516	15.6981	16.3869	15.4863	15.8705	14.7063	15.6269	15.8525	15.5516	15.6981	16.3869	15.4863	Naa30	0.266684	0.467669	0.330062	4	4	1	0
Q80TH2	ERBIN_MOUSE	Erbin	Erbin	76459.3	83785.5	80744	59650.8	96558.5	66993.7	87625.4	113952	16.2224	16.3544	16.3011	15.8643	16.5591	16.0317	16.4191	16.7981	16.2224	16.3544	16.3011	15.8643	16.5591	16.0317	16.4191	16.7981	Erbin	0.266461	0.22038	0.656827	4	4	1	0
P70255	NFIC_MOUSE	Nfic	Nuclear factor 1 C-type	54536.4	53861.8	46938.6	59783	67464	63950.5	63582	62807.1	15.7349	15.717	15.5185	15.8674	16.0418	15.9647	15.9563	15.9386	15.7349	15.717	15.5185	15.8674	16.0418	15.9647	15.9563	15.9386	Nfic	0.265907	0.0124797	1.90379	4	4	1	0
H3BKJ7	H3BKJ7_MOUSE	Stx5a	Syntaxin 5A	32426	27198.7	44085.6	21590.8	35223.1	31540.5	53496.5	29517.3	14.9849	14.7313	15.428	14.3981	15.1042	14.9449	15.7072	14.8493	14.9849	14.7313	15.428	14.3981	15.1042	14.9449	15.7072	14.8493	Stx5a	0.26583	0.394966	0.40344	4	4	1	0
O70252	HMOX2_MOUSE	Hmox2	Heme oxygenase 2	194810	202162	262908	191118	175795	260874	324989	277034	17.5717	17.6252	18.0042	17.5441	17.4235	17.993	18.31	18.0797	17.5717	17.6252	18.0042	17.5441	17.4235	17.993	18.31	18.0797	Hmox2	0.265275	0.266811	0.573796	4	4	1	0
Q9JHT5	AMMR1_MOUSE	Ammecr1	Nuclear protein AMMECR1	7666.38	9428.43	12228.4	7957.04	7465.99	7277.05	16342.6	16509.9	12.9043	13.2028	13.5779	12.958	12.8661	12.8291	13.9963	14.011	12.9043	13.2028	13.5779	12.958	12.8661	12.8291	13.9963	14.011	Ammecr1	0.264888	0.49806	0.302718	4	4	1	0
Q9ERA6	TFP11_MOUSE	Tfip11	Tuftelin-interacting protein 11	117895	105906	113741	126721	132243	129950	152097	143449	16.8471	16.6924	16.7954	16.9513	17.0128	16.9876	17.2146	17.1302	16.8471	16.6924	16.7954	16.9513	17.0128	16.9876	17.2146	17.1302	Tfip11	0.264746	0.0127156	1.89566	4	4	1	0
Q9D554	SF3A3_MOUSE	Sf3a3	Splicing factor 3A subunit 3	461460	515964	457154	561530	567076	604751	586725	632706	18.8158	18.9769	18.8023	19.099	19.1132	19.206	19.1623	19.2712	18.8158	18.9769	18.8023	19.099	19.1132	19.206	19.1623	19.2712	Sf3a3	0.264646	0.0147989	1.82977	4	4	1	0
Q61846	MELK_MOUSE	Melk	Maternal embryonic leucine zipper kinase	81946.1	85896.8	97197.8	88931.6	81644.5	120597	127339	101046	16.3224	16.3903	16.5686	16.4404	16.3171	16.8798	16.9583	16.6247	16.3224	16.3903	16.5686	16.4404	16.3171	16.8798	16.9583	16.6247	Melk	0.26453	0.13618	0.865888	4	4	1	0
Q5NCR9	NSRP1_MOUSE	Nsrp1	Nuclear speckle splicing regulatory protein 1	36977	39400	36004.4	42132.8	46872.6	49339.2	51035.8	38979.9	15.1743	15.2659	15.1359	15.3627	15.5165	15.5904	15.6392	15.2504	15.1743	15.2659	15.1359	15.3627	15.5165	15.5904	15.6392	15.2504	Nsrp1	0.264445	0.0388005	1.41116	4	4	1	0
Q9D654	Q9D654_MOUSE	Zfp84	Zinc finger protein 84	21891.8	21892	28091.1	20114.1	25958.5	22410.3	28305.6	34233.6	14.4181	14.4181	14.7778	14.2959	14.6639	14.4519	14.7888	15.0631	14.4181	14.4181	14.7778	14.2959	14.6639	14.4519	14.7888	15.0631	Zfp84	0.264439	0.159646	0.796843	4	4	1	0
A0A0B4J1E3	A0A0B4J1E3_MOUSE	Ighmbp2	Immunoglobulin mu DNA binding protein 2	30249.6	19499.3	27191.5	17182.8	16824	28327.2	38673.7	31113.6	14.8846	14.2511	14.7309	14.0687	14.0382	14.7899	15.2391	14.9253	14.8846	14.2511	14.7309	14.0687	14.0382	14.7899	15.2391	14.9253	Ighmbp2	0.264287	0.44001	0.356538	4	4	1	0
E9PYI1	ZN568_MOUSE	Znf568	Zinc finger protein 568	12948.8	18182.2	14650.4	12273.1	16389.7	19710	14889.6	18308.8	13.6605	14.1502	13.8387	13.5832	14.0005	14.2666	13.862	14.1602	13.6605	14.1502	13.8387	13.5832	14.0005	14.2666	13.862	14.1602	Znf568	0.264194	0.137425	0.861936	4	4	1	0
Q80TA1	EPT1_MOUSE	Selenoi	Ethanolaminephosphotransferase 1		11291.9	16716.4	11013.4	9353.39	14024.9	10893.8	14267.7		13.463	14.029	13.427	13.1913	13.7757	13.4112	13.8005	12.2035	13.463	14.029	13.427	13.1913	13.7757	13.4112	13.8005	Selenoi	0.264047	0.545225	0.263425	4	3	1	0
P97377	CDK2_MOUSE	Cdk2	Cyclin-dependent kinase 2	226407	167169	336073	153334	186893	274556	316925	249173	17.7886	17.3509	18.3584	17.2263	17.5119	18.0667	18.2738	17.9268	17.7886	17.3509	18.3584	17.2263	17.5119	18.0667	18.2738	17.9268	Cdk2	0.263731	0.416599	0.380282	4	4	1	0
Q99PQ2	TRI11_MOUSE	Trim11	E3 ubiquitin-protein ligase TRIM11	16270.4	14659.9	16838.9	13581.5	26029.5	16546.2	12266.3	21439.2	13.99	13.8396	14.0395	13.7294	14.6679	14.0142	13.5824	14.388	13.99	13.8396	14.0395	13.7294	14.6679	14.0142	13.5824	14.388	Trim11	0.263508	0.324923	0.48822	4	4	1	0
Q8BP78	F10C1_MOUSE	Fra10ac1	Protein FRA10AC1 homolog	13742.2	20170.2	27040.5	23138	22544.6	21945.9	24872.3	29218.7	13.7463	14.2999	14.7228	14.498	14.4605	14.4217	14.6023	14.8346	13.7463	14.2999	14.7228	14.498	14.4605	14.4217	14.6023	14.8346	Fra10ac1	0.262985	0.294095	0.531513	4	4	1	0
Q8BU04	UBR7_MOUSE	Ubr7	Putative E3 ubiquitin-protein ligase UBR7	44160.9	41209.6	33736.6	38475.7	44262.9	45978.8	45339.8	53052.9	15.4305	15.3307	15.042	15.2317	15.4338	15.4887	15.4685	15.6951	15.4305	15.3307	15.042	15.2317	15.4338	15.4887	15.4685	15.6951	Ubr7	0.262816	0.0415237	1.3817	4	4	1	0
Q8BY46	ZN574_MOUSE	Znf574	Zinc finger protein 574	78471.6	80604.7	98975.6	70600.5	78784.5	100610	115557	99927.8	16.2599	16.2986	16.5948	16.1074	16.2656	16.6184	16.8182	16.6086	16.2599	16.2986	16.5948	16.1074	16.2656	16.6184	16.8182	16.6086	Znf574	0.262562	0.137913	0.860395	4	4	1	0
Q924Z5	TRAM2_MOUSE	Tram2	Translocating chain-associated membrane protein 2	39252.9	30643.8	41059	31399.6	40345.1	46167.4	42582	40481.8	15.2605	14.9033	15.3254	14.9385	15.3001	15.4946	15.378	15.305	15.2605	14.9033	15.3254	14.9385	15.3001	15.4946	15.378	15.305	Tram2	0.262486	0.0670193	1.1738	4	4	1	0
Q9QWH1	PHC2_MOUSE	Phc2	Polyhomeotic-like protein 2	60391.9	56887.9	59056.5	63600	69960.2	77051.8	81279.1	60977.9	15.8821	15.7958	15.8498	15.9567	16.0942	16.2335	16.3106	15.896	15.8821	15.7958	15.8498	15.9567	16.0942	16.2335	16.3106	15.896	Phc2	0.262484	0.0352833	1.45243	4	4	1	0
Q8K301	DDX52_MOUSE	Ddx52	Probable ATP-dependent RNA helicase DDX52	85559.1	93129.6	90974.7	107489	102454	105617	107259	138844	16.3846	16.507	16.4732	16.7138	16.6446	16.6885	16.7107	17.0831	16.3846	16.507	16.4732	16.7138	16.6446	16.6885	16.7107	17.0831	Ddx52	0.262088	0.0771684	1.11256	4	4	1	0
Q8VEJ4	NLE1_MOUSE	Nle1	Notchless protein homolog 1	22016.3	17601.7	22915.4	22762.1	29955.5	23969.1	24260.8	23998.3	14.4263	14.1034	14.484	14.4743	14.8705	14.5489	14.5663	14.5506	14.4263	14.1034	14.484	14.4743	14.8705	14.5489	14.5663	14.5506	Nle1	0.26208	0.0716789	1.14461	4	4	1	0
A6X8Z5	RHG31_MOUSE	Arhgap31	Rho GTPase-activating protein 31	26667.4	21164.7	24505.4	22034.9	22503.6	29753.1	29371.4	32039.3	14.7028	14.3694	14.5808	14.4275	14.4579	14.8608	14.8421	14.9676	14.7028	14.3694	14.5808	14.4275	14.4579	14.8608	14.8421	14.9676	Arhgap31	0.261956	0.0997441	1.00111	4	4	1	0
Q924Z4	CERS2_MOUSE	Cers2	Ceramide synthase 2	101523	119451	306536	282028	400853	222653	147545	164474	16.6314	16.8661	18.2257	18.1055	18.6127	17.7644	17.1708	17.3275	16.6314	16.8661	18.2257	18.1055	18.6127	17.7644	17.1708	17.3275	Cers2	0.261691	0.635364	0.196977	4	4	1	0
P10630	IF4A2_MOUSE	Eif4a2	Eukaryotic initiation factor 4A-II	24860.2	24414.4	18107.3	23921.1	25978	26353.5	29371.3	27005.8	14.6016	14.5754	14.1443	14.546	14.665	14.6857	14.8421	14.721	14.6016	14.5754	14.1443	14.546	14.665	14.6857	14.8421	14.721	Eif4a2	0.261634	0.0634612	1.19749	4	4	1	0
P62996	TRA2B_MOUSE	Tra2b	Transformer-2 protein homolog beta	1204630	1062400	1054920	851567	1098870	1321980	1414420	1155520	20.2002	20.0189	20.0087	19.6998	20.0676	20.3343	20.4318	20.1401	20.2002	20.0189	20.0087	19.6998	20.0676	20.3343	20.4318	20.1401	Tra2b	0.261558	0.0982841	1.00752	4	4	1	0
Q60989	XIAP_MOUSE	Xiap	E3 ubiquitin-protein ligase XIAP	34641.9	34380.2	32473.4	24107.9	34778.1	35700.4	45306	34197.5	15.0802	15.0693	14.987	14.5572	15.0859	15.1237	15.4674	15.0616	15.0802	15.0693	14.987	14.5572	15.0859	15.1237	15.4674	15.0616	Xiap	0.261213	0.14538	0.837494	4	4	1	0
Q9JI13	SAS10_MOUSE	Utp3	Something about silencing protein 10	21836	21727.3	21167.3	19514.6	28902.7	26221.2	26321	20269.2	14.4144	14.4072	14.3695	14.2523	14.8189	14.6784	14.6839	14.307	14.4144	14.4072	14.3695	14.2523	14.8189	14.6784	14.6839	14.307	Utp3	0.261208	0.0655525	1.18341	4	4	1	0
Q9QXA5	LSM4_MOUSE	Lsm4	U6 snRNA-associated Sm-like protein LSm4	164116	155768	136857	149937	200742	192446	170797	163908	17.3244	17.249	17.0623	17.194	17.615	17.5541	17.3819	17.3225	17.3244	17.249	17.0623	17.194	17.615	17.5541	17.3819	17.3225	Lsm4	0.260956	0.0257851	1.58863	4	4	1	0
O89106	FHIT_MOUSE	Fhit	Bis(5'-adenosyl)-triphosphatase	9156.52	8776.28	14688.5	8701.46	8714.32	9144.07	16148	16454.2	13.1606	13.0994	13.8424	13.087	13.0892	13.1586	13.9791	14.0062	13.1606	13.0994	13.8424	13.087	13.0892	13.1586	13.9791	14.0062	Fhit	0.260903	0.43291	0.363602	4	4	1	0
Q99LL3	CHSTC_MOUSE	Chst12	Carbohydrate sulfotransferase 12	68316.8	56710	59464.1	58644.3	69526.1	71423.3	74521.6	75249.8	16.06	15.7913	15.8597	15.8397	16.0853	16.1241	16.1854	16.1994	16.06	15.7913	15.8597	15.8397	16.0853	16.1241	16.1854	16.1994	Chst12	0.260861	0.00697803	2.15627	4	4	1	0
Q9CPX6	ATG3_MOUSE	Atg3	Ubiquitin-like-conjugating enzyme ATG3	107487	121763	182910	105266	129791	178022	164359	136754	16.7138	16.8937	17.4808	16.6837	16.9858	17.4417	17.3265	17.0612	16.7138	16.8937	17.4808	16.6837	16.9858	17.4417	17.3265	17.0612	Atg3	0.260817	0.269196	0.569931	4	4	1	0
Q9JMH6	TRXR1_MOUSE	Txnrd1	Thioredoxin reductase 1, cytoplasmic	433489	489644	529907	483159	544757	554233	611509	606396	18.7256	18.9014	19.0154	18.8821	19.0553	19.0801	19.222	19.2099	18.7256	18.9014	19.0154	18.8821	19.0553	19.0801	19.222	19.2099	Txnrd1	0.260693	0.0121784	1.91441	4	4	1	0
Q8BVE3	VATH_MOUSE	Atp6v1h	V-type proton ATPase subunit H	291785	318947	414350	189441	336763	382200	340430	343446	18.1545	18.283	18.6605	17.5314	18.3614	18.544	18.377	18.3897	18.1545	18.283	18.6605	17.5314	18.3614	18.544	18.377	18.3897	Atp6v1h	0.26067	0.316253	0.499965	4	4	1	0
B2RY04	DOCK5_MOUSE	Dock5	Dedicator of cytokinesis protein 5	51710.4	60666.1	59731.2	62379.2	59719.7	66650.4	76272.8	79294.1	15.6582	15.8886	15.8662	15.9288	15.8659	16.0243	16.2189	16.2749	15.6582	15.8886	15.8662	15.9288	15.8659	16.0243	16.2189	16.2749	Dock5	0.260577	0.0580257	1.23638	4	4	1	0
Q80TI0	ASTRB_MOUSE	Gramd1b	Protein Aster-B	18396.1	29190.3	46031.4	26016.2	29104.7	29283.1	46152.8	33659.7	14.1671	14.8332	15.4903	14.6671	14.829	14.8378	15.4941	15.0387	14.1671	14.8332	15.4903	14.6671	14.829	14.8378	15.4941	15.0387	Gramd1b	0.260461	0.439222	0.357316	4	4	1	0
A0A0N4SW73	A0A0N4SW73_MOUSE	Rab11fip5	RAB11 family interacting protein 5 (class I)	24745.9	21258.7	15149	21844.8	27420.5	22608.4	28591.7	20204.5	14.5949	14.3758	13.8869	14.415	14.743	14.4646	14.8033	14.3024	14.5949	14.3758	13.8869	14.415	14.743	14.4646	14.8033	14.3024	Rab11fip5	0.260158	0.224062	0.649631	4	4	1	0
P61963	DCAF7_MOUSE	Dcaf7	DDB1- and CUL4-associated factor 7	144203	90781	78455.6	75012.4	125838	109788	144999	79049.2	17.1377	16.4701	16.2596	16.1948	16.9412	16.7444	17.1457	16.2705	17.1377	16.4701	16.2596	16.1948	16.9412	16.7444	17.1457	16.2705	Dcaf7	0.25986	0.397801	0.400334	4	4	1	0
Q9ERI5	JMJD6_MOUSE	Jmjd6	Bifunctional arginine demethylase and lysyl-hydroxylase JMJD6	17229.5	19726	16488	19974.6	26396	23183.8	17029.4	22048.4	14.0726	14.2678	14.0091	14.2859	14.688	14.5008	14.0557	14.4284	14.0726	14.2678	14.0091	14.2859	14.688	14.5008	14.0557	14.4284	Jmjd6	0.259394	0.133881	0.873282	4	4	1	0
Q14CH7	SYAM_MOUSE	Aars2	Alanine--tRNA ligase, mitochondrial	31134.2	28829.1	41129.4	29094.2	37019.1	35516	38680.6	43327.7	14.9262	14.8152	15.3279	14.8284	15.176	15.1162	15.2393	15.403	14.9262	14.8152	15.3279	14.8284	15.176	15.1162	15.2393	15.403	Aars2	0.259178	0.103946	0.983193	4	4	1	0
Q8C735	LIN9_MOUSE	Lin9	Protein lin-9 homolog					5591.58	7833.84							12.449	12.9355			12.2035	12.1943	12.2707	12.2163	12.449	12.9355	12.2107	12.3248	Lin9	0.258798	0.157661	0.802275	2	0	1	0
A6H619	PHRF1_MOUSE	Phrf1	PHD and RING finger domain-containing protein 1	23856	25803.2	25557.3	28485.3	40100.6	17535.9	36141.1	36103.9	14.5421	14.6553	14.6414	14.7979	15.2913	14.098	15.1414	15.1399	14.5421	14.6553	14.6414	14.7979	15.2913	14.098	15.1414	15.1399	Phrf1	0.258469	0.392352	0.406324	4	4	1	0
Q80Y44	DDX10_MOUSE	Ddx10	Probable ATP-dependent RNA helicase DDX10	40684.8	39206.3	46394.8	31408	41571.9	45915.7	51899.6	48023.2	15.3122	15.2588	15.5017	14.9388	15.3433	15.4867	15.6634	15.5514	15.3122	15.2588	15.5017	14.9388	15.3433	15.4867	15.6634	15.5514	Ddx10	0.258345	0.103513	0.985004	4	4	1	0
P47802	MTX1_MOUSE	Mtx1	Metaxin-1	67059.9	67749.3	53782.8	59471.4	72380.8	74139.2	75165	73686.7	16.0332	16.0479	15.7149	15.8599	16.1433	16.1779	16.1978	16.1691	16.0332	16.0479	15.7149	15.8599	16.1433	16.1779	16.1978	16.1691	Mtx1	0.258078	0.0177397	1.75105	4	4	1	0
Q5U465	CC125_MOUSE	Ccdc125	Coiled-coil domain-containing protein 125	58142	52237.6	64446.6	55438.2	66217.9	73787.7	75868.7	59813	15.8273	15.6728	15.9758	15.7586	16.0149	16.1711	16.2112	15.8682	15.8273	15.6728	15.9758	15.7586	16.0149	16.1711	16.2112	15.8682	Ccdc125	0.257728	0.0438247	1.35828	4	4	1	0
P38533	HSF2_MOUSE	Hsf2	Heat shock factor protein 2	2709.02	5965.9	8631.89	4884.96	4528.66	6743.48	5370.5	8476.36	11.4036	12.5425	13.0755	12.2541	12.1449	12.7193	12.3908	13.0492	11.4036	12.5425	13.0755	12.2541	12.1449	12.7193	12.3908	13.0492	Hsf2	0.257136	0.545014	0.263592	4	4	1	0
Q91VN6	DDX41_MOUSE	Ddx41	Probable ATP-dependent RNA helicase DDX41	75300.1	83503.2	88094.7	70730.2	83016.2	99069.8	107396	90481.7	16.2004	16.3495	16.4268	16.11	16.3411	16.5962	16.7126	16.4653	16.2004	16.3495	16.4268	16.11	16.3411	16.5962	16.7126	16.4653	Ddx41	0.257117	0.0540361	1.26732	4	4	1	0
A2RTL5	RSRC2_MOUSE	Rsrc2	Arginine/serine-rich coiled-coil protein 2	18293	21348	30968.2	25765.7	29458	23900.6	29947.7	30138.9	14.159	14.3818	14.9185	14.6532	14.8464	14.5448	14.8702	14.8793	14.159	14.3818	14.9185	14.6532	14.8464	14.5448	14.8702	14.8793	Rsrc2	0.257037	0.21046	0.676829	4	4	1	0
Q8VCQ3	NRBF2_MOUSE	Nrbf2	Nuclear receptor-binding factor 2	22673.4	22307.5	27296.5	26770.5	24637.4	29946.2	32509.7	31379.1	14.4687	14.4452	14.7364	14.7084	14.5886	14.8701	14.9886	14.9375	14.4687	14.4452	14.7364	14.7084	14.5886	14.8701	14.9886	14.9375	Nrbf2	0.256502	0.0724156	1.14017	4	4	1	0
Q9R0P5	DEST_MOUSE	Dstn	Destrin	1219240	1453560	1285950	1285620	1746160	1589050	1503660	1429830	20.2176	20.4712	20.2944	20.294	20.7358	20.5997	20.52	20.4474	20.2176	20.4712	20.2944	20.294	20.7358	20.5997	20.52	20.4474	Dstn	0.25645	0.0202575	1.69341	4	4	1	0
Q9CQQ7	AT5F1_MOUSE	Atp5pb	ATP synthase F(0) complex subunit B1, mitochondrial	1927990	1523120	2061570	1746270	1773750	2138430	2550200	2223440	20.8787	20.5386	20.9753	20.7358	20.7584	21.0281	21.2822	21.0844	20.8787	20.5386	20.9753	20.7358	20.7584	21.0281	21.2822	21.0844	Atp5pb	0.256153	0.125155	0.902552	4	4	1	0
E9Q5F9	SETD2_MOUSE	Setd2	Histone-lysine N-methyltransferase SETD2	55516.1	45210.8	35229.5	43496.4	55501.7	54451.2	54741.2	47270.3	15.7606	15.4644	15.1045	15.4086	15.7602	15.7327	15.7403	15.5286	15.7606	15.4644	15.1045	15.4086	15.7602	15.7327	15.7403	15.5286	Setd2	0.255951	0.127878	0.893206	4	4	1	0
Q91ZW2	OFUT1_MOUSE	Pofut1	GDP-fucose protein O-fucosyltransferase 1	58087.8	54677.5	57135.5	55499.8	65897.5	72281.7	66999.9	64140.1	15.8259	15.7387	15.8021	15.7602	16.0079	16.1413	16.0319	15.9689	15.8259	15.7387	15.8021	15.7602	16.0079	16.1413	16.0319	15.9689	Pofut1	0.255797	0.000881731	3.05466	4	4	1	0
O08553	DPYL2_MOUSE	Dpysl2	Dihydropyrimidinase-related protein 2	432324	339020	299495	375358	463911	426866	435408	388008	18.7218	18.371	18.1922	18.5179	18.8235	18.7034	18.732	18.5657	18.7218	18.371	18.1922	18.5179	18.8235	18.7034	18.732	18.5657	Dpysl2	0.255451	0.0855881	1.06759	4	4	1	0
Q8BHG9	CGBP1_MOUSE	Cggbp1	CGG triplet repeat-binding protein 1	330713	315293	334312	324213	406959	379575	379834	390997	18.3352	18.2663	18.3508	18.3066	18.6345	18.534	18.535	18.5768	18.3352	18.2663	18.3508	18.3066	18.6345	18.534	18.535	18.5768	Cggbp1	0.255346	0.000146283	3.83481	4	4	1	0
E9PY16	E9PY16_MOUSE	Adap1	ArfGAP with dual PH domains 1	103120	102656	121503	119588	110157	125736	170019	132525	16.654	16.6475	16.8906	16.8677	16.7492	16.94	17.3753	17.0159	16.654	16.6475	16.8906	16.8677	16.7492	16.94	17.3753	17.0159	Adap1	0.255178	0.132755	0.876951	4	4	1	0
Q9D2C9	SNPC3_MOUSE	Snapc3	snRNA-activating protein complex subunit 3	11379.2	12820.4	12517.2	9330.39	12921.2	15106.5	17471.6	10135.2	13.4741	13.6462	13.6116	13.1877	13.6575	13.8829	14.0927	13.3071	13.4741	13.6462	13.6116	13.1877	13.6575	13.8829	14.0927	13.3071	Snapc3	0.255134	0.244517	0.61169	4	4	1	0
Q99KR6	RNF34_MOUSE	Rnf34	E3 ubiquitin-protein ligase RNF34	6897.97	9947.13	13985.9	9729.98	10007	13715.1	9367.59	14718.2	12.752	13.2801	13.7717	13.2482	13.2887	13.7435	13.1935	13.8453	12.752	13.2801	13.7717	13.2482	13.2887	13.7435	13.1935	13.8453	Rnf34	0.254762	0.371795	0.429696	4	4	1	0
Q3USZ8	DIK2A_MOUSE	Dipk2a	Divergent protein kinase domain 2A	24146.3	27085.5	37927.4	20135.7	31215	24609.4	35852.2	36736.9	14.5595	14.7252	15.211	14.2975	14.93	14.5869	15.1298	15.1649	14.5595	14.7252	15.211	14.2975	14.93	14.5869	15.1298	15.1649	Dipk2a	0.254605	0.317355	0.498455	4	4	1	0
Q69ZR9	TASOR_MOUSE	Tasor	Protein TASOR	30777.4	37425.6	36578.4	36641.2	37550.1	43093.9	37933.6	50930.5	14.9096	15.1917	15.1587	15.1612	15.1965	15.3952	15.2112	15.6362	14.9096	15.1917	15.1587	15.1612	15.1965	15.3952	15.2112	15.6362	Tasor	0.254488	0.0817625	1.08745	4	4	1	0
P00920	CAH2_MOUSE	Ca2	Carbonic anhydrase 2	123873	112499	146915	85992.4	112324	93882.6	192179	175922	16.9185	16.7796	17.1646	16.3919	16.7773	16.5186	17.5521	17.4246	16.9185	16.7796	17.1646	16.3919	16.7773	16.5186	17.5521	17.4246	Ca2	0.254486	0.424947	0.371666	4	4	1	0
Q9WUR9	KAD4_MOUSE	Ak4	Adenylate kinase 4, mitochondrial	49198.4	56721.7	66286.8	56847.7	44343	64347.9	99231.9	75137.9	15.5863	15.7916	16.0164	15.7948	15.4364	15.9736	16.5985	16.1973	15.5863	15.7916	16.0164	15.7948	15.4364	15.9736	16.5985	16.1973	Ak4	0.254152	0.36225	0.440991	4	4	1	0
Q9ERS5	PKHA2_MOUSE	Plekha2	Pleckstrin homology domain-containing family A member 2	41266.2	44325.2	52865.7	50668.1	49693	59141.6	49863.3	67635.1	15.3327	15.4358	15.69	15.6288	15.6008	15.8519	15.6057	16.0455	15.3327	15.4358	15.69	15.6288	15.6008	15.8519	15.6057	16.0455	Plekha2	0.254117	0.110297	0.957438	4	4	1	0
Q64522	H2A2B_MOUSE	H2ac21	Histone H2A type 2-B	2283450	2690490	1551160	2418900	2977260	3844750	3484100	1168750	21.1228	21.3594	20.5649	21.2059	21.5056	21.8745	21.7324	20.1565	21.1228	21.3594	20.5649	21.2059	21.5056	21.8745	21.7324	20.1565	H2ac21	0.253961	0.576894	0.238904	4	4	1	0
Q5NBY9	PATZ1_MOUSE	Patz1	POZ (BTB) and AT hook-containing zinc finger 1	36053	44866.8	50318.3	41805.1	43573.3	50412.8	54979.4	56956.9	15.1378	15.4534	15.6188	15.3514	15.4112	15.6215	15.7466	15.7976	15.1378	15.4534	15.6188	15.3514	15.4112	15.6215	15.7466	15.7976	Patz1	0.253867	0.103584	0.984706	4	4	1	0
Q78IK4	MIC27_MOUSE	Apool	MICOS complex subunit Mic27	65006.7	89556.7	140932	68877.7	51708.2	130991	151660	111189	15.9883	16.4505	17.1046	16.0717	15.6581	16.9991	17.2105	16.7627	15.9883	16.4505	17.1046	16.0717	15.6581	16.9991	17.2105	16.7627	Apool	0.253786	0.575737	0.239776	4	4	1	0
A2AU61	A2AU61_MOUSE	Raly	HnRNP-associated with lethal yellow (Fragment)		43149.4	47259.4	35733.5	24153.8	33099.4	28357.4	30638.5		15.3971	15.5283	15.125	14.56	15.0145	14.7914	14.9031	12.2035	15.3971	15.5283	15.125	14.56	15.0145	14.7914	14.9031	Raly	0.253774	0.760981	0.118626	4	3	1	0
Q5SXJ3	FANCJ_MOUSE	Brip1	Fanconi anemia group J protein homolog	43505	68011.7	73259.8	63915.3	65312.3	71015.8	82934.7	72711.8	15.4089	16.0535	16.1607	15.9639	15.9951	16.1159	16.3397	16.1499	15.4089	16.0535	16.1607	15.9639	15.9951	16.1159	16.3397	16.1499	Brip1	0.253378	0.213492	0.670619	4	4	1	0
D0QMC3	MNDAL_MOUSE	Mndal	Myeloid cell nuclear differentiation antigen-like protein	322793	397998	462532	326899	398054	388338	478898	529298	18.3002	18.6024	18.8192	18.3185	18.6026	18.567	18.8694	19.0137	18.3002	18.6024	18.8192	18.3185	18.6026	18.567	18.8694	19.0137	Mndal	0.253077	0.173962	0.759546	4	4	1	0
Q80XK6	ATG2B_MOUSE	Atg2b	Autophagy-related protein 2 homolog B	24084	24861.6	16421.5	23736.6	27880.2	24480.4	23975.3	28768.1	14.5558	14.6016	14.0033	14.5348	14.767	14.5793	14.5493	14.8122	14.5558	14.6016	14.0033	14.5348	14.767	14.5793	14.5493	14.8122	Atg2b	0.253048	0.154943	0.809829	4	4	1	0
P58501	PAXB1_MOUSE	Paxbp1	PAX3- and PAX7-binding protein 1	121085	128672	134975	132750	141537	142921	158030	176099	16.8857	16.9733	17.0423	17.0184	17.1108	17.1249	17.2698	17.426	16.8857	16.9733	17.0423	17.0184	17.1108	17.1249	17.2698	17.426	Paxbp1	0.252965	0.0209253	1.67933	4	4	1	0
Q9EQU3	TLR9_MOUSE	Tlr9	Toll-like receptor 9	56640.7	51268.6	65958.2	57079.3	63296.4	66899.3	75032.4	69375.3	15.7896	15.6458	16.0093	15.8007	15.9498	16.0297	16.1952	16.0821	15.7896	15.6458	16.0093	15.8007	15.9498	16.0297	16.1952	16.0821	Tlr9	0.252904	0.0317703	1.49798	4	4	1	0
O35680	RT12_MOUSE	Mrps12	Small ribosomal subunit protein uS12m	23275.7	53739.6	52632.9	64992.4	30724.2	54550.6	80048.8	64296.7	14.5065	15.7137	15.6837	15.988	14.9071	15.7353	16.2886	15.9725	14.5065	15.7137	15.6837	15.988	14.9071	15.7353	16.2886	15.9725	Mrps12	0.252887	0.588405	0.230324	4	4	1	0
Q8R3B7	BRD8_MOUSE	Brd8	Bromodomain-containing protein 8	37502.9	44025.9	47899.5	37597.5	46783.2	49650	46445.8	55560.2	15.1947	15.4261	15.5477	15.1983	15.5137	15.5995	15.5033	15.7618	15.1947	15.4261	15.5477	15.1983	15.5137	15.5995	15.5033	15.7618	Brd8	0.252846	0.0542007	1.266	4	4	1	0
Q64516	GLPK_MOUSE	Gk	Glycerol kinase	80719.6	74494.6	64828.7	70282.2	87059.1	79632.4	86675.7	91893	16.3006	16.1848	15.9843	16.1009	16.4097	16.2811	16.4033	16.4877	16.3006	16.1848	15.9843	16.1009	16.4097	16.2811	16.4033	16.4877	Gk	0.252772	0.0188626	1.7244	4	4	1	0
P35283	RAB12_MOUSE	Rab12	Ras-related protein Rab-12	16521.8	14962	15001	17089	19349.3	19907.9	17521.7	18901.5	14.0121	13.869	13.8728	14.0608	14.24	14.2811	14.0969	14.2062	14.0121	13.869	13.8728	14.0608	14.24	14.2811	14.0969	14.2062	Rab12	0.252366	0.00696037	2.15737	4	4	1	0
Q8R3I3	COG6_MOUSE	Cog6	Conserved oligomeric Golgi complex subunit 6	26215.2	31845.8	26068.3	27556.9	31229.4	33744.9	31693.8	36096.9	14.6781	14.9588	14.67	14.7501	14.9306	15.0424	14.9519	15.1396	14.6781	14.9588	14.67	14.7501	14.9306	15.0424	14.9519	15.1396	Cog6	0.251858	0.0224561	1.64867	4	4	1	0
P04202	TGFB1_MOUSE	Tgfb1	Transforming growth factor beta-1 proprotein	110621	88180.1	113477	95062.6	104858	118923	118462	143173	16.7553	16.4282	16.792	16.5366	16.6781	16.8597	16.8541	17.1274	16.7553	16.4282	16.792	16.5366	16.6781	16.8597	16.8541	17.1274	Tgfb1	0.251787	0.0952986	1.02091	4	4	1	0
Q920E5	FPPS_MOUSE	Fdps	Farnesyl pyrophosphate synthase	820318	612000	507093	755128	887436	790467	842632	653456	19.6458	19.2232	18.9519	19.5264	19.7593	19.5923	19.6845	19.3177	19.6458	19.2232	18.9519	19.5264	19.7593	19.5923	19.6845	19.3177	Fdps	0.251664	0.219382	0.658798	4	4	1	0
Q9EP89	LACTB_MOUSE	Lactb	Serine beta-lactamase-like protein LACTB, mitochondrial	137950	159553	223550	151762	159547	178305	246374	213802	17.0738	17.2837	17.7702	17.2115	17.2836	17.444	17.9105	17.7059	17.0738	17.2837	17.7702	17.2115	17.2836	17.444	17.9105	17.7059	Lactb	0.251216	0.267402	0.572835	4	4	1	0
Q922M5	CDA7L_MOUSE	Cdca7l	Cell division cycle-associated 7-like protein	38832.1	40707.5	43613.2	43927.6	45764.2	48852.2	51924.9	52332.1	15.245	15.313	15.4125	15.4228	15.4819	15.5761	15.6641	15.6754	15.245	15.313	15.4125	15.4228	15.4819	15.5761	15.6641	15.6754	Cdca7l	0.251082	0.00665486	2.17686	4	4	1	0
Q8BG19	TMTC4_MOUSE	Tmtc4	Protein O-mannosyl-transferase TMTC4	11688.3	11803.4	21569.6	12055.5	14699.8	14711.5	22009.4	15115.8	13.5128	13.5269	14.3967	13.5574	13.8435	13.8447	14.4258	13.8838	13.5128	13.5269	14.3967	13.5574	13.8435	13.8447	14.4258	13.8838	Tmtc4	0.25099	0.369893	0.431924	4	4	1	0
Q9Z1A1	Q9Z1A1_MOUSE	Tfg	TFG protein	231679	252489	262360	245114	316600	312383	234893	324439	17.8218	17.9459	18.0012	17.9031	18.2723	18.253	17.8416	18.3076	17.8218	17.9459	18.0012	17.9031	18.2723	18.253	17.8416	18.3076	Tfg	0.250645	0.0738621	1.13158	4	4	1	0
Q8K203	NEIL3_MOUSE	Neil3	Endonuclease 8-like 3	8004.07	11899.3	12756.4	11546.1	9769.24	16016.3	14736.3	12179.6	12.9665	13.5386	13.6389	13.4951	13.254	13.9673	13.8471	13.5722	12.9665	13.5386	13.6389	13.4951	13.254	13.9673	13.8471	13.5722	Neil3	0.250348	0.296252	0.528339	4	4	1	0
Q921K9;Q9CXE2	BCL7A_MOUSE;BCL7B_MOUSE	Bcl7a;Bcl7b	B-cell CLL/lymphoma 7 protein family member B	38116.9	50106.1	62106	33880	48269	50068	56080.7	59350.8	15.2181	15.6127	15.9224	15.0481	15.5588	15.6116	15.7752	15.857	15.2181	15.6127	15.9224	15.0481	15.5588	15.6116	15.7752	15.857	Bcl7a;Bcl7b	0.250294	0.275744	0.559494	4	4	1	0
Q8R2R3	AAGAB_MOUSE	Aagab	Alpha- and gamma-adaptin-binding protein p34	38709.7	33018	41816.4	45344.1	43245.8	50725.8	44491.2	49694	15.2404	15.011	15.3518	15.4686	15.4003	15.6304	15.4412	15.6008	15.2404	15.011	15.3518	15.4686	15.4003	15.6304	15.4412	15.6008	Aagab	0.250235	0.0687998	1.16241	4	4	1	0
A0A286YCX3;Q8BSL0	A0A286YCX3_MOUSE;Q8BSL0_MOUSE	Zkscan8	Zinc finger with KRAB and SCAN domains 8	10061.1	10613.5	8297.79	8657.27	9614.49	10109.9	11013	14332.8	13.2965	13.3736	13.0185	13.0797	13.231	13.3035	13.4269	13.807	13.2965	13.3736	13.0185	13.0797	13.231	13.3035	13.4269	13.807	Zkscan8	0.250027	0.155115	0.809347	4	4	1	0
Q8R1S4	MTSS1_MOUSE	Mtss1	Protein MTSS 1	9869.62	8187.22		7954.97	6781.25	9480.95	11881.4	8313.13	13.2688	12.9992		12.9576	12.7273	13.2108	13.5364	13.0212	13.2688	12.9992	12.2707	12.9576	12.7273	13.2108	13.5364	13.0212	Mtss1	0.249858	0.393779	0.404748	4	3	1	0
Q7M759	AB17B_MOUSE	Abhd17b	Alpha/beta hydrolase domain-containing protein 17B	43403.4	33061.6	38788.7	27281.4	35740.3	41396.2	50029.7	40952.9	15.4055	15.0129	15.2433	14.7356	15.1253	15.3372	15.6105	15.3217	15.4055	15.0129	15.2433	14.7356	15.1253	15.3372	15.6105	15.3217	Abhd17b	0.24932	0.207353	0.68329	4	4	1	0
O70310	NMT1_MOUSE	Nmt1	Glycylpeptide N-tetradecanoyltransferase 1	518773	418633	388048	456319	577041	497132	504492	530377	18.9847	18.6753	18.5659	18.7997	19.1383	18.9233	18.9445	19.0167	18.9847	18.6753	18.5659	18.7997	19.1383	18.9233	18.9445	19.0167	Nmt1	0.249271	0.0504024	1.29755	4	4	1	0
Q60596	XRCC1_MOUSE	Xrcc1	DNA repair protein XRCC1	124481	130804	153939	127032	126421	157461	173214	184279	16.9256	16.997	17.232	16.9548	16.9479	17.2646	17.4022	17.4915	16.9256	16.997	17.232	16.9548	16.9479	17.2646	17.4022	17.4915	Xrcc1	0.249199	0.12102	0.917142	4	4	1	0
Q8K0F1	TBC23_MOUSE	Tbc1d23	TBC1 domain family member 23	20326.8	25768.8	13626.2	12919.7	21194.5	22160.5	19890.4	19692.1	14.3111	14.6533	13.7341	13.6573	14.3714	14.4357	14.2798	14.2653	14.3111	14.6533	13.7341	13.6573	14.3714	14.4357	14.2798	14.2653	Tbc1d23	0.249101	0.341965	0.466019	4	4	1	0
Q80V62	FACD2_MOUSE	Fancd2	Fanconi anemia group D2 protein homolog	47382.4	62041	61752.6	50870.5	54414.5	61070.2	75078.7	73836.4	15.5321	15.9209	15.9142	15.6345	15.7317	15.8982	16.1961	16.172	15.5321	15.9209	15.9142	15.6345	15.7317	15.8982	16.1961	16.172	Fancd2	0.249073	0.146264	0.834863	4	4	1	0
Q3U319	BRE1B_MOUSE	Rnf40	E3 ubiquitin-protein ligase BRE1B	80475.7	101902	102224	93067.4	100851	117410	112818	116502	16.2963	16.6368	16.6414	16.506	16.6219	16.8412	16.7836	16.83	16.2963	16.6368	16.6414	16.506	16.6219	16.8412	16.7836	16.83	Rnf40	0.249061	0.0402203	1.39556	4	4	1	0
Q60631	GRB2_MOUSE	Grb2	Growth factor receptor-bound protein 2	1530550	1615610	1068250	1427640	1504320	1749050	1618830	1764400	20.5456	20.6236	20.0268	20.4452	20.5207	20.7381	20.6265	20.7507	20.5456	20.6236	20.0268	20.4452	20.5207	20.7381	20.6265	20.7507	Grb2	0.2487	0.133693	0.873892	4	4	1	0
P03975	IGEB_MOUSE	Iap	IgE-binding protein	15783.7	34550.1	14644.5	12582.6	27655.5	14526.4	22644.1	22002	13.9461	15.0764	13.8381	13.6191	14.7553	13.8264	14.4668	14.4253	13.9461	15.0764	13.8381	13.6191	14.7553	13.8264	14.4668	14.4253	Iap	0.248525	0.537219	0.269849	4	4	1	0
Q924C1	XPO5_MOUSE	Xpo5	Exportin-5	113637	132082	144368	120638	135644	148415	164409	157146	16.7941	17.0111	17.1394	16.8803	17.0495	17.1793	17.3269	17.2617	16.7941	17.0111	17.1394	16.8803	17.0495	17.1793	17.3269	17.2617	Xpo5	0.248139	0.0421275	1.37543	4	4	1	0
Q5RJH6	SMG7_MOUSE	Smg7	Nonsense-mediated mRNA decay factor SMG7	16347.6	22319	28678	18703.3	20354.4	26882.8	29756.6	23898	13.9968	14.446	14.8077	14.191	14.3131	14.7144	14.8609	14.5446	13.9968	14.446	14.8077	14.191	14.3131	14.7144	14.8609	14.5446	Smg7	0.247884	0.284711	0.545595	4	4	1	0
Q9WV72	ASB3_MOUSE	Asb3	Ankyrin repeat and SOCS box protein 3	5886.61		7856.65	5951.61	6753.52	5821.66	7606.77	8576.02	12.5232		12.9397	12.5391	12.7214	12.5072	12.8931	13.0661	12.5232	12.1943	12.9397	12.5391	12.7214	12.5072	12.8931	13.0661	Asb3	0.247871	0.24805	0.60546	4	3	1	0
Q4JK59	TET2_MOUSE	Tet2	Methylcytosine dioxygenase TET2	44060.6	38460.2	47955.4	41975.3	44886.2	58697.8	53901.1	47744.8	15.4272	15.2311	15.5494	15.3573	15.454	15.841	15.718	15.5431	15.4272	15.2311	15.5494	15.3573	15.454	15.841	15.718	15.5431	Tet2	0.247787	0.0641021	1.19313	4	4	1	0
Q80XI6	M3K11_MOUSE	Map3k11	Mitogen-activated protein kinase kinase kinase 11	8797.63	7791.17	11467.8		10018	6990.31	9125.28	11633.9	13.1029	12.9276	13.4853		13.2903	12.7711	13.1557	13.506	13.1029	12.9276	13.4853	12.2163	13.2903	12.7711	13.1557	13.506	Map3k11	0.247753	0.450992	0.345831	4	3	1	0
Q60848	HELLS_MOUSE	Hells	Lymphocyte-specific helicase	137423	134115	129136	143783	160091	164811	162192	158809	17.0683	17.0331	16.9785	17.1335	17.2885	17.3305	17.3073	17.2769	17.0683	17.0331	16.9785	17.1335	17.2885	17.3305	17.3073	17.2769	Hells	0.247455	0.000372247	3.42917	4	4	1	0
Q9JMA2	TGT_MOUSE	Qtrt1	Queuine tRNA-ribosyltransferase catalytic subunit 1	9642.56	10719.8	14107.9	7874.83	12461.7	10399.7	13765	12775.4	13.2352	13.388	13.7842	12.943	13.6052	13.3443	13.7487	13.6411	13.2352	13.388	13.7842	12.943	13.6052	13.3443	13.7487	13.6411	Qtrt1	0.247206	0.251957	0.598673	4	4	1	0
Q8K1C0	ANGE2_MOUSE	Angel2	Protein angel homolog 2	28022.6	33133.5	40598.5	30832.4	35914.1	41205	39609.6	39331.7	14.7743	15.016	15.3091	14.9122	15.1323	15.3305	15.2736	15.2634	14.7743	15.016	15.3091	14.9122	15.1323	15.3305	15.2736	15.2634	Angel2	0.247039	0.087129	1.05984	4	4	1	0
Q6P542	ABCF1_MOUSE	Abcf1	ATP-binding cassette sub-family F member 1	457224	462962	457501	425851	502009	532963	548631	557282	18.8025	18.8205	18.8034	18.7	18.9374	19.0237	19.0655	19.088	18.8025	18.8205	18.8034	18.7	18.9374	19.0237	19.0655	19.088	Abcf1	0.247018	0.00123117	2.90968	4	4	1	0
O35130	NEP1_MOUSE	Emg1	Ribosomal RNA small subunit methyltransferase NEP1	23052	18938.1	26940.1	20279.9	27705.3	18891	28298	31938.9	14.4926	14.209	14.7175	14.3078	14.7579	14.2054	14.7884	14.963	14.4926	14.209	14.7175	14.3078	14.7579	14.2054	14.7884	14.963	Emg1	0.246972	0.260121	0.584824	4	4	1	0
Q8C460	ERI3_MOUSE	Eri3	ERI1 exoribonuclease 3	56254.5	77804.9	117930	46890.9	82442.8	82830.6	92290.9	76117.7	15.7797	16.2476	16.8476	15.517	16.3311	16.3379	16.4939	16.2159	15.7797	16.2476	16.8476	15.517	16.3311	16.3379	16.4939	16.2159	Eri3	0.246745	0.438643	0.357889	4	4	1	0
Q80WR5	CA174_MOUSE		UPF0688 protein C1orf174 homolog	32040.3	22239.2	23320.7	23022	38712.3	30111	31170	20861	14.9676	14.4408	14.5093	14.4907	15.2405	14.878	14.9279	14.3485	14.9676	14.4408	14.5093	14.4907	15.2405	14.878	14.9279	14.3485		0.246608	0.309165	0.50981	4	4	1	0
Q99N94	RM09_MOUSE	Mrpl9	Large ribosomal subunit protein bL9m	99930.9	90220.4	88745.2	79275.5	114966	116877	89869.4	104061	16.6086	16.4612	16.4374	16.2746	16.8108	16.8346	16.4555	16.6671	16.6086	16.4612	16.4374	16.2746	16.8108	16.8346	16.4555	16.6671	Mrpl9	0.246578	0.0675635	1.17029	4	4	1	0
P0C7N9	PSMG4_MOUSE	Psmg4	Proteasome assembly chaperone 4	104026	102292	105839	103249	108754	115532	127518	143674	16.6666	16.6423	16.6915	16.6558	16.7307	16.8179	16.9603	17.1324	16.6666	16.6423	16.6915	16.6558	16.7307	16.8179	16.9603	17.1324	Psmg4	0.246306	0.0318334	1.49712	4	4	1	0
Q2EMV9	PAR14_MOUSE	Parp14	Protein mono-ADP-ribosyltransferase PARP14	58707.9	55600.2	55349.9	45677.1	54672.1	54953.5	72037.6	75387.9	15.8413	15.7628	15.7563	15.4792	15.7385	15.7459	16.1365	16.202	15.8413	15.7628	15.7563	15.4792	15.7385	15.7459	16.1365	16.202	Parp14	0.245851	0.145895	0.83596	4	4	1	0
Q9JK81	MYG1_MOUSE	Myg1	MYG1 exonuclease	96276.2	99841	109385	80298.8	101587	109289	122916	122288	16.5549	16.6073	16.7391	16.2931	16.6324	16.7378	16.9073	16.8999	16.5549	16.6073	16.7391	16.2931	16.6324	16.7378	16.9073	16.8999	Myg1	0.24575	0.0762554	1.11773	4	4	1	0
A0A1W2P7J4	A0A1W2P7J4_MOUSE	Atad2b	ATPase family, AAA domain containing 2B (Fragment)	39923.5	50013.6	47142.3	43041.4	47853.6	55253	51870.4	58378.1	15.285	15.61	15.5247	15.3934	15.5463	15.7538	15.6626	15.8331	15.285	15.61	15.5247	15.3934	15.5463	15.7538	15.6626	15.8331	Atad2b	0.245678	0.0407087	1.39031	4	4	1	0
Q9Z2X2	PSD10_MOUSE	Psmd10	26S proteasome non-ATPase regulatory subunit 10	330134	399081	450092	330931	330962	451797	567580	456938	18.3327	18.6063	18.7799	18.3362	18.3363	18.7853	19.1145	18.8016	18.3327	18.6063	18.7799	18.3362	18.3363	18.7853	19.1145	18.8016	Psmd10	0.24567	0.252147	0.598346	4	4	1	0
Q99P69	NUF2_MOUSE	Nuf2	Kinetochore protein Nuf2	32756.4	32359.8	26315.7	26070.9	31337	32788.7	35560.2	39294.5	14.9995	14.9819	14.6836	14.6702	14.9356	15.0009	15.118	15.262	14.9995	14.9819	14.6836	14.6702	14.9356	15.0009	15.118	15.262	Nuf2	0.245328	0.0780799	1.10746	4	4	1	0
[truncated: 6,346 more rows]

## Sheet: Cytoscape_Node_Table
@id	display name	name	query term	selected	shared name	stringdb::canonical name	stringdb::database identifier	stringdb::description	stringdb::enhancedLabel Passthrough	stringdb::full name	stringdb::imageurl	stringdb::namespace	stringdb::node color	stringdb::node type	stringdb::sequence	stringdb::species	stringdb::STRING style	stringdb::structures
[truncated: 129 more rows]

[truncated: 2 more sheets: String_enrichment_table, gProfiler_enrichment_table]
